# Supplementary material for: Molecular and anatomical characterization of parabrachial neurons and their axonal projections
Source: eLife journal article supplement (doi:10.7554/elife.81868), 2022-11-01

| Parabrachial Subnuclei |        |    |    |    |    |     |    |    |     |    | Nearby Nuclei |     |     |     |     |     |     |     |     |     |     |     |   |
|------------------------|--------|----|----|----|----|-----|----|----|-----|----|---------------|-----|-----|-----|-----|-----|-----|-----|-----|-----|-----|-----|---|
|                        | Bregma | le | lv | ld | lc | ls  | mm | me | scp | KF | CUN           | LDT | MEV | SUT | SLD | B   | PSV | CBm | CBg | CBp | PAG | LC  |   |
| Tac1<br>N12            | -5.0   | 1  | 2  | 1  | 2  | 2   | 2  | 1  | 1   |    | 1             | n/a |     | 1   | 1   | n/a |     |     |     |     |     | 1   |   |
|                        | -5.1   | 1  | 1  | 3  | 3  | 3   | 2  |    |     |    | 3             | n/a |     | 2   | 1   | n/a |     |     |     |     |     | 1   | 2 |
|                        | -5.2   |    | 1  | 1  | 4  | 3   | 1  |    | 1   |    | 3             | n/a |     | 1   | 2   |     |     |     |     |     |     | n/a | 2 |
|                        | -5.3   | 1  | 3  | 2  | 3  | 3   | 2  |    | 1   |    | n/a           | 2   |     | 1   | n/a |     |     |     |     |     |     | n/a | 2 |
|                        | -5.4   |    | 3  | 1  | 3  | n/a | 1  |    | 1   |    | n/a           | 1   |     |     | n/a |     |     |     |     |     |     | n/a | 2 |
| Brs3<br>N1             | -5.0   |    |    |    | 1  | 1   |    |    | 1   |    |               | n/a |     |     |     | n/a |     |     |     |     |     |     |   |
|                        | -5.1   |    | 1  | 1  | 2  |     |    |    | 1   |    |               | n/a |     |     |     | n/a |     |     |     |     |     | 1   |   |
|                        | -5.2   |    | 1  | 1  | 3  |     |    |    |     |    |               | n/a |     |     | 1   |     |     |     |     |     |     | n/a |   |
|                        | -5.3   |    | 3  | 1  | 3  |     |    |    | 1   |    | n/a           | 1   |     |     | n/a |     |     |     |     |     |     | n/a |   |
|                        | -5.4   |    | 1  | 3  | 3  | n/a | 1  |    | 1   |    | n/a           | 1   |     |     | n/a |     |     |     |     |     |     | n/a |   |
| Nmu<br>N13             | -5.0   |    |    |    |    |     | 1  |    | 1   |    |               | n/a |     |     |     | n/a |     |     |     |     |     |     |   |
|                        | -5.1   | 1  |    |    | 1  |     |    |    | 1   |    |               | n/a |     |     |     | n/a |     |     |     |     |     |     |   |
|                        | -5.2   |    |    |    | 1  |     | 1  |    | 1   | 1  |               | n/a |     |     |     |     |     |     |     |     |     | n/a |   |
|                        | -5.3   |    |    |    |    |     |    | 1  | 1   |    | n/a           |     |     |     | n/a |     |     |     |     |     |     | n/a |   |
|                        | -5.4   |    |    |    |    | n/a |    |    |     |    | n/a           |     |     |     | n/a |     |     |     |     |     |     | n/a |   |
| Pla2g2f<br>N14         | -5.0   |    |    |    |    |     |    |    |     |    |               | n/a |     |     |     | n/a |     |     |     |     |     |     |   |
|                        | -5.1   |    |    |    |    |     | 1  |    |     |    |               | n/a |     |     |     | n/a |     |     |     |     |     |     |   |
|                        | -5.2   |    |    |    |    |     | 2  |    |     |    |               | n/a |     |     |     |     |     |     |     |     |     | n/a |   |
|                        | -5.3   |    |    |    |    |     | 1  |    |     |    | n/a           |     |     |     | n/a |     |     |     |     |     |     | n/a |   |
|                        | -5.4   |    |    |    |    | n/a |    |    |     |    | n/a           |     |     |     | n/a |     |     |     |     |     |     | n/a |   |
| Gda<br>N15             | -5.0   | 4  | 1  | 1  | 2  | 2   | 2  |    | 1   | 2  |               | n/a |     |     |     | n/a |     |     |     |     |     |     |   |
|                        | -5.1   | 4  | 1  |    | 3  | 3   | 3  |    | 1   | 1  | 1             | n/a |     |     |     | n/a |     |     |     |     |     |     |   |
|                        | -5.2   | 4  | 1  |    | 3  | 3   | 3  |    |     |    | 1             | n/a |     |     |     |     |     |     |     |     |     | n/a |   |
|                        | -5.3   | 3  | 3  | 1  | 3  |     | 3  |    |     |    | n/a           |     |     |     | n/a |     |     |     |     |     |     | n/a | 1 |
|                        | -5.4   | 2  | 3  | 1  | 4  | n/a | 3  |    |     |    | n/a           |     |     |     | n/a |     |     |     |     |     |     | n/a | 1 |
| Calca<br>N15, N16      | -5.0   | 4  | 2  | 1  | 1  |     | 1  | 1  |     | 1  |               | n/a |     |     | 1   | n/a |     |     |     |     |     |     | 2 |
|                        | -5.1   | 4  | 2  | 1  | 1  |     | 2  | 1  | 1   | 1  |               | n/a |     |     |     | n/a |     |     |     |     |     |     | 3 |
|                        | -5.2   | 3  | 2  |    | 1  |     | 2  |    | 1   | 2  |               | n/a |     |     | 1   | 1   |     |     |     |     |     | n/a | 3 |
|                        | -5.3   | 2  | 1  | 1  |    |     | 2  |    | 1   | 1  | n/a           |     |     |     | n/a |     |     |     |     |     |     | n/a | 3 |
|                        | -5.4   | 1  | 2  | 1  |    | n/a | 2  |    | 2   |    | n/a           |     |     |     | n/a |     |     |     |     |     |     | n/a | 4 |
| Tac1<br>N15-N17        | -5.0   | 4  | 2  | 2  | 3  | 3   | 3  |    |     | 2  | 1             | n/a |     |     |     | n/a |     |     |     |     |     |     |   |
|                        | -5.1   | 3  | 3  | 2  | 3  | 2   | 3  |    |     | 1  | 1             | 1   | n/a |     |     | n/a |     |     |     |     |     |     |   |
|                        | -5.2   | 3  | 3  | 2  | 3  | 2   | 3  |    |     | 1  | 1             | 1   | n/a |     |     |     |     |     |     |     |     | n/a |   |
|                        | -5.3   | 3  | 3  | 1  | 3  |     | 3  |    |     | 1  | 1             | n/a |     |     |     | n/a |     |     |     |     |     | n/a |   |
|                        | -5.4   | 3  | 2  | 2  | 3  | n/a | 3  |    | 1   |    | n/a           |     |     |     | n/a |     |     |     |     |     |     | n/a |   |
| Satb2<br>N17           | -5.0   |    |    |    |    |     |    |    |     |    |               | n/a |     |     |     | n/a |     |     |     |     |     |     |   |
|                        | -5.1   |    | 1  |    |    |     | 2  |    |     |    |               | n/a |     |     |     | n/a |     |     |     |     |     |     |   |
|                        | -5.2   |    | 2  |    |    |     | 2  |    |     |    |               | n/a |     |     |     |     |     |     |     |     |     | n/a |   |
|                        | -5.3   | 2  | 2  | 1  |    |     | 2  |    | 1   |    | n/a           |     |     |     | n/a |     |     |     |     |     |     | n/a |   |
|                        | -5.4   | 1  | 2  |    | 1  | n/a | 3  |    | 2   |    | n/a           |     |     |     | n/a |     |     |     |     |     |     | n/a |   |
| Phox2b<br>N19          | -5.0   | 1  | 1  |    | 1  |     | 3  | 1  | 1   |    |               | n/a |     |     | 3   |     | n/a | 1   |     |     |     |     | 1 |
|                        | -5.1   | 1  | 2  |    | 1  | 1   | 3  | 2  | 1   |    |               | n/a |     |     | 3   |     | n/a | 1   |     |     |     |     | 1 |
|                        | -5.2   |    | 1  |    | 1  |     | 3  | 1  |     |    |               | n/a |     |     | 2   | 1   | 1   | 1   |     |     |     | n/a | 3 |
|                        | -5.3   |    |    |    |    |     | 3  |    |     |    | n/a           |     |     |     | 2   | n/a | 1   |     |     |     |     | n/a | 3 |
|                        | -5.4   |    |    |    | 1  | n/a | 1  |    |     |    | n/a           |     |     |     | n/a | n/a | 1   | 1   | 1   |     |     | n/a | 3 |
| Slc32a1<br>N20, N21    | -5.0   | 1  | 1  | 1  | 1  | 3   | 2  | 1  | 1   | 2  | 3             | n/a |     |     | 1   | 3   | n/a | 1   | 4   | 1   | 4   | 3   | 1 |
|                        | -5.1   | 1  | 1  | 1  | 1  | 3   | 2  | 1  | 1   | 3  | 3             | n/a |     |     | 1   | 3   | n/a | 1   | 4   | 1   | 4   | 3   | 2 |
|                        | -5.2   | 1  | 1  |    | 2  | 2   | 2  | 1  | 1   | 3  | 3             | n/a |     |     | 1   | 3   | 2   | 1   | 4   | 1   | 4   | n/a | 1 |
|                        | -5.3   | 1  |    | 1  | 1  | 1   | 1  | 1  | 1   | 3  | n/a           | 3   |     |     |     | n/a | 2   | 1   | 4   | 1   | 4   | n/a | 1 |
|                        | -5.4   |    | 1  | 1  | 1  | n/a | 1  |    | 1   | 3  | n/a           | 3   |     |     |     | n/a | 1   | 2   | 4   | 1   | 4   | n/a | 1 |
| Pnoc<br>N21            | -5.0   |    |    | 1  | 1  | 2   | 1  |    | 1   | 1  | 3             | n/a |     |     | 1   | 3   | n/a | 2   |     |     |     | 2   |   |
|                        | -5.1   | 1  | 1  | 1  |    | 1   | 1  |    | 1   | 2  | 3             | n/a |     |     | 1   | 3   | n/a | 1   |     |     |     | 1   | 3 |
|                        | -5.2   | 1  | 1  | 3  | 1  | 1   | 1  | 1  | 1   | 2  | 2             | n/a |     |     | 1   | 2   | 1   | 2   |     |     |     | n/a | 2 |
|                        | -5.3   | 1  |    | 3  |    |     | 1  | 1  |     | 1  | n/a           | 3   |     |     | 1   | n/a | 1   | 3   |     |     |     | n/a | 2 |
|                        | -5.4   |    |    | 3  | 2  | n/a |    |    | 1   | 2  | n/a           | 3   |     |     |     | n/a | 1   | 2   |     |     |     | n/a | 2 |

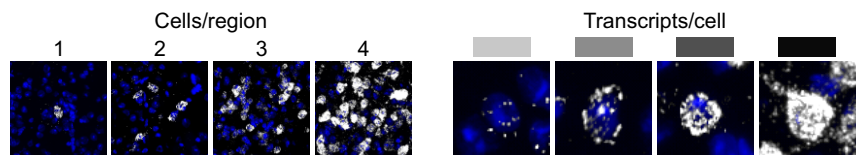

Supplement: supp [file elife-81868-supp-v1.zip]
