# Supplementary material for: Molecular and anatomical characterization of parabrachial neurons and their axonal projections
Source: eLife journal article supplement (doi:10.7554/elife.81868), 2022-11-01

|                         | Parabrachial Subnuclei |    |    |    |    |     |    |    |     |    |     | Nearby Nuclei |     |     |     |     |     |     |     |     |     |    |
|-------------------------|------------------------|----|----|----|----|-----|----|----|-----|----|-----|---------------|-----|-----|-----|-----|-----|-----|-----|-----|-----|----|
|                         | Bregma                 | le | lv | ld | lc | ls  | mm | me | scp | KF | CUN | LDT           | MEV | SUT | SLD | B   | PSV | CBm | CBg | CBp | PAG | LC |
| <i>Slc17a7</i><br>N1    | -5.0                   |    | 1  | 1  |    |     |    | 1  |     | 1  |     | n/a           | 4   |     |     | n/a | 4   | 2   | 4   |     |     |    |
|                         | -5.1                   |    |    | 1  |    |     |    | 1  |     |    |     | n/a           | 4   |     |     | n/a | 3   | 2   | 4   |     | 1   |    |
|                         | -5.2                   |    |    | 1  |    |     | 1  | 1  |     |    |     | n/a           | 4   |     | 1   |     | 3   | 2   | 4   |     | n/a |    |
|                         | -5.3                   |    |    | 1  |    |     |    |    |     |    | n/a |               | 4   |     | n/a |     | 4   |     | 4   |     | n/a |    |
|                         | -5.4                   |    |    |    |    | n/a |    |    |     |    | n/a |               | 4   |     | n/a |     | 2   |     | 4   |     | n/a | 1  |
| <i>Piezo2</i><br>N2     | -5.0                   |    |    |    |    |     |    |    |     |    |     | n/a           | 4   |     |     | n/a |     |     |     |     |     |    |
|                         | -5.1                   |    | 1  | 2  | 1  | 2   |    |    |     |    | 1   | n/a           | 4   |     |     | n/a |     |     |     |     |     |    |
|                         | -5.2                   |    |    | 1  | 1  | 1   |    |    |     |    |     | n/a           | 4   |     |     |     |     |     |     |     | n/a |    |
|                         | -5.3                   |    | 1  |    | 1  |     |    |    |     |    | n/a |               | 4   |     | n/a |     |     |     |     |     | n/a |    |
|                         | -5.4                   |    | 2  | 1  | 2  | n/a | 1  |    |     |    | n/a |               | 4   |     | n/a | 1   |     |     |     |     | n/a |    |
| <i>Nfib</i><br>N3       | -5.0                   |    |    |    |    |     |    |    |     |    |     | n/a           |     |     |     | n/a | 1   |     | 4   |     |     |    |
|                         | -5.1                   |    |    |    |    |     |    |    |     |    |     | n/a           |     |     |     | n/a | 2   |     | 4   |     |     |    |
|                         | -5.2                   |    |    |    |    |     |    |    |     |    |     | n/a           |     |     |     |     | 2   |     | 4   |     | n/a |    |
|                         | -5.3                   |    |    |    |    |     |    |    |     |    | n/a | 3             |     |     | n/a |     | 3   |     | 4   |     | n/a |    |
|                         | -5.4                   |    |    |    |    | n/a |    |    |     |    | n/a | 3             |     |     | n/a |     | 2   |     | 4   |     | n/a |    |
| <i>Pappa</i><br>N4      | -5.0                   |    |    |    |    |     |    |    |     |    |     | n/a           |     |     |     | n/a |     |     | 3   |     |     |    |
|                         | -5.1                   |    |    |    |    |     |    |    |     |    |     | n/a           |     |     |     | n/a |     |     | 3   |     |     |    |
|                         | -5.2                   |    |    |    |    |     |    |    |     |    |     | n/a           |     |     |     |     |     |     | 3   |     | n/a |    |
|                         | -5.3                   |    |    | 1  |    |     |    |    |     |    | n/a |               | 1   |     | n/a | 2   |     |     | 3   |     | n/a |    |
|                         | -5.4                   |    |    | 1  |    | n/a |    |    |     |    | n/a |               | 3   |     | n/a | 3   |     |     | 3   |     | n/a |    |
| <i>Th</i><br>N5, N10    | -5.0                   | 1  | 2  | 1  | 1  | 2   |    |    |     |    | 1   | n/a           |     |     |     | n/a |     |     |     |     |     | 3  |
|                         | -5.1                   |    | 2  | 3  | 1  | 1   | 1  |    |     |    | 1   | n/a           |     |     |     | n/a |     |     |     |     |     | 3  |
|                         | -5.2                   | 1  |    | 4  | 1  |     |    |    |     |    |     | n/a           |     |     | 1   | 1   |     |     |     |     | n/a | 3  |
|                         | -5.3                   |    |    | 3  |    |     |    |    |     |    | n/a |               |     |     | n/a |     |     |     |     |     | n/a | 3  |
|                         | -5.4                   |    | 1  | 1  |    | n/a |    |    |     |    | n/a |               |     |     | n/a |     |     |     |     |     | n/a | 4  |
| <i>Ghrh</i><br>N5, N10  | -5.0                   | 1  | 1  | 1  | 1  | 1   |    |    |     |    |     | n/a           |     |     |     | n/a |     |     |     |     |     |    |
|                         | -5.1                   | 1  | 1  | 3  |    |     |    |    |     |    |     | n/a           |     |     |     | n/a |     |     |     |     |     |    |
|                         | -5.2                   | 1  |    | 3  |    |     |    |    |     |    |     | n/a           |     |     |     |     |     |     |     |     | n/a | 1  |
|                         | -5.3                   |    |    | 2  |    |     |    |    |     |    | n/a |               |     |     | n/a |     |     |     |     |     | n/a |    |
|                         | -5.4                   |    | 1  | 1  |    | n/a |    |    |     |    | n/a |               |     |     | n/a |     |     |     |     |     | n/a | 1  |
| <i>Crh</i><br>N6        | -5.0                   | 3  | 1  |    |    |     | 1  | 1  |     | 1  |     | n/a           |     |     | 3   | n/a |     |     |     |     |     |    |
|                         | -5.1                   | 2  | 1  | 1  |    |     |    |    |     |    |     | n/a           |     |     | 1   | n/a |     |     |     |     |     | 2  |
|                         | -5.2                   |    | 1  | 1  |    |     |    |    |     |    |     | n/a           |     |     | 1   | 3   |     |     |     |     | n/a |    |
|                         | -5.3                   |    | 1  | 1  |    |     |    |    |     |    | n/a |               |     |     | n/a | 4   |     |     |     |     | n/a | 1  |
|                         | -5.4                   |    |    | 2  |    | n/a |    |    |     |    | n/a |               |     |     | n/a | 3   |     |     |     |     | n/a |    |
| <i>Stk32b</i><br>N7, N8 | -5.0                   | 3  | 2  | 3  | 1  | 1   | 1  |    | 1   |    | 1   | n/a           |     |     | 2   | n/a |     |     |     |     |     |    |
|                         | -5.1                   | 3  | 3  | 3  | 2  | 2   | 2  |    | 1   |    | 2   | n/a           |     | 2   | 2   | n/a |     |     |     |     | 2   | 3  |
|                         | -5.2                   | 2  | 2  | 2  | 3  | 3   | 3  |    | 1   | 1  | 2   | n/a           |     |     | 3   | 2   |     |     |     |     | n/a | 3  |
|                         | -5.3                   |    | 1  | 1  | 3  | 3   | 2  | 1  | 1   | 1  | n/a | 2             |     |     | n/a | 1   |     |     |     |     | n/a | 3  |
|                         | -5.4                   |    | 2  | 1  | 2  | n/a | 2  |    | 1   |    | n/a | 2             |     |     | n/a | 2   |     |     |     |     | n/a | 3  |
| <i>Calcr</i><br>N8      | -5.0                   |    | 2  | 1  | 1  | 1   | 1  |    |     |    |     | n/a           |     |     | 1   | n/a |     |     |     |     |     | 2  |
|                         | -5.1                   | 1  | 2  | 2  | 1  | 2   | 1  |    | 1   |    | 1   | n/a           |     |     |     | n/a |     |     |     |     | 1   | 3  |
|                         | -5.2                   |    |    | 1  | 1  | 1   | 1  |    |     |    |     | n/a           |     |     | 1   | 1   |     |     |     |     | n/a | 3  |
|                         | -5.3                   |    | 2  |    |    |     | 1  |    |     |    | n/a | 1             |     |     | n/a | 1   |     |     |     |     | n/a | 3  |
|                         | -5.4                   |    | 1  | 1  | 1  | n/a | 1  |    |     |    | n/a | 1             |     |     | n/a | 2   |     |     |     |     | n/a | 4  |
| <i>Gal</i><br>N9        | -5.0                   |    |    |    | 1  |     | 1  |    | 1   |    |     | n/a           |     |     | 2   | n/a |     |     |     |     |     | 1  |
|                         | -5.1                   |    |    |    |    |     | 1  |    | 1   |    |     | n/a           |     |     | 1   | n/a |     |     |     |     |     | 3  |
|                         | -5.2                   |    |    |    |    |     | 1  |    |     |    |     | n/a           |     |     | 1   |     |     |     |     |     | n/a | 3  |
|                         | -5.3                   |    |    |    |    |     |    |    |     |    | n/a |               |     |     | n/a |     |     |     |     |     | n/a | 4  |
|                         | -5.4                   |    |    |    |    | n/a |    |    | 1   |    | n/a |               |     |     | n/a |     |     |     |     |     | n/a | 4  |
| <i>Npnt</i><br>N9       | -5.0                   |    |    |    |    |     |    |    |     |    |     | n/a           |     |     | 3   | n/a |     |     |     |     |     |    |
|                         | -5.1                   |    |    |    |    |     |    |    |     |    |     | n/a           |     |     | 2   | n/a |     |     |     |     |     | 1  |
|                         | -5.2                   |    |    | 2  |    |     |    |    |     |    |     | n/a           |     |     |     |     | 1   |     |     |     | n/a | 1  |
|                         | -5.3                   |    |    | 2  |    |     |    |    |     |    | n/a | 1             |     |     | n/a | 1   | 2   |     |     |     | n/a | 1  |
|                         | -5.4                   |    |    | 2  |    | n/a |    |    |     |    | n/a |               |     |     | n/a |     |     |     |     |     | n/a | 1  |
| <i>Pdyn</i><br>N9, N10  | -5.0                   |    | 3  | 1  | 1  | 1   |    |    |     |    |     | n/a           |     |     | 1   | n/a |     |     |     |     |     |    |
|                         | -5.1                   | 1  | 3  | 3  | 1  | 1   |    |    |     |    |     | n/a           |     |     |     | n/a |     |     |     |     | 1   | 2  |
|                         | -5.2                   |    | 1  | 4  | 2  | 1   | 1  |    |     |    |     | n/a           |     |     | 2   |     |     |     |     |     | n/a | 2  |
|                         | -5.3                   |    |    | 4  | 1  |     | 1  |    |     |    | n/a | 1             |     |     | n/a |     |     |     |     |     | n/a | 2  |
|                         | -5.4                   |    |    | 3  |    | n/a | 1  |    |     |    | n/a | 1             |     |     | n/a |     |     |     |     |     | n/a | 2  |
| <i>Pax5</i><br>N11      | -5.0                   | 1  | 2  | 2  | 3  | 3   | 1  |    | 2   |    | 3   | n/a           |     |     | 1   | n/a |     |     |     |     | 3   |    |
|                         | -5.1                   | 1  | 2  | 3  | 3  | 4   | 1  |    | 1   |    | 3   | n/a           |     |     |     | n/a |     |     |     |     | 2   | 2  |
|                         | -5.2                   | 1  | 1  | 1  | 3  | 4   | 1  |    | 1   |    | 2   | n/a           |     |     | 1   |     |     |     |     |     | n/a | 2  |
|                         | -5.3                   | 1  | 3  | 1  | 3  | 3   | 1  |    | 1   |    | n/a |               |     |     | n/a |     |     |     |     |     | n/a | 2  |
|                         | -5.4                   |    | 3  | 1  | 3  | n/a | 2  |    | 1   |    | n/a |               |     |     | n/a |     |     |     |     |     | n/a | 1  |

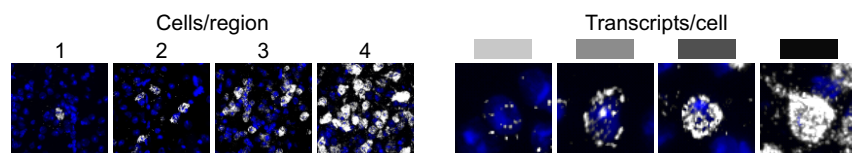

Supplement: supp [file elife-81868-supp-v1.zip]
