# Supplementary material for: Molecular and anatomical characterization of parabrachial neurons and their axonal projections
Source: eLife journal article supplement (doi:10.7554/elife.81868), 2022-11-01

# cluster-specific features

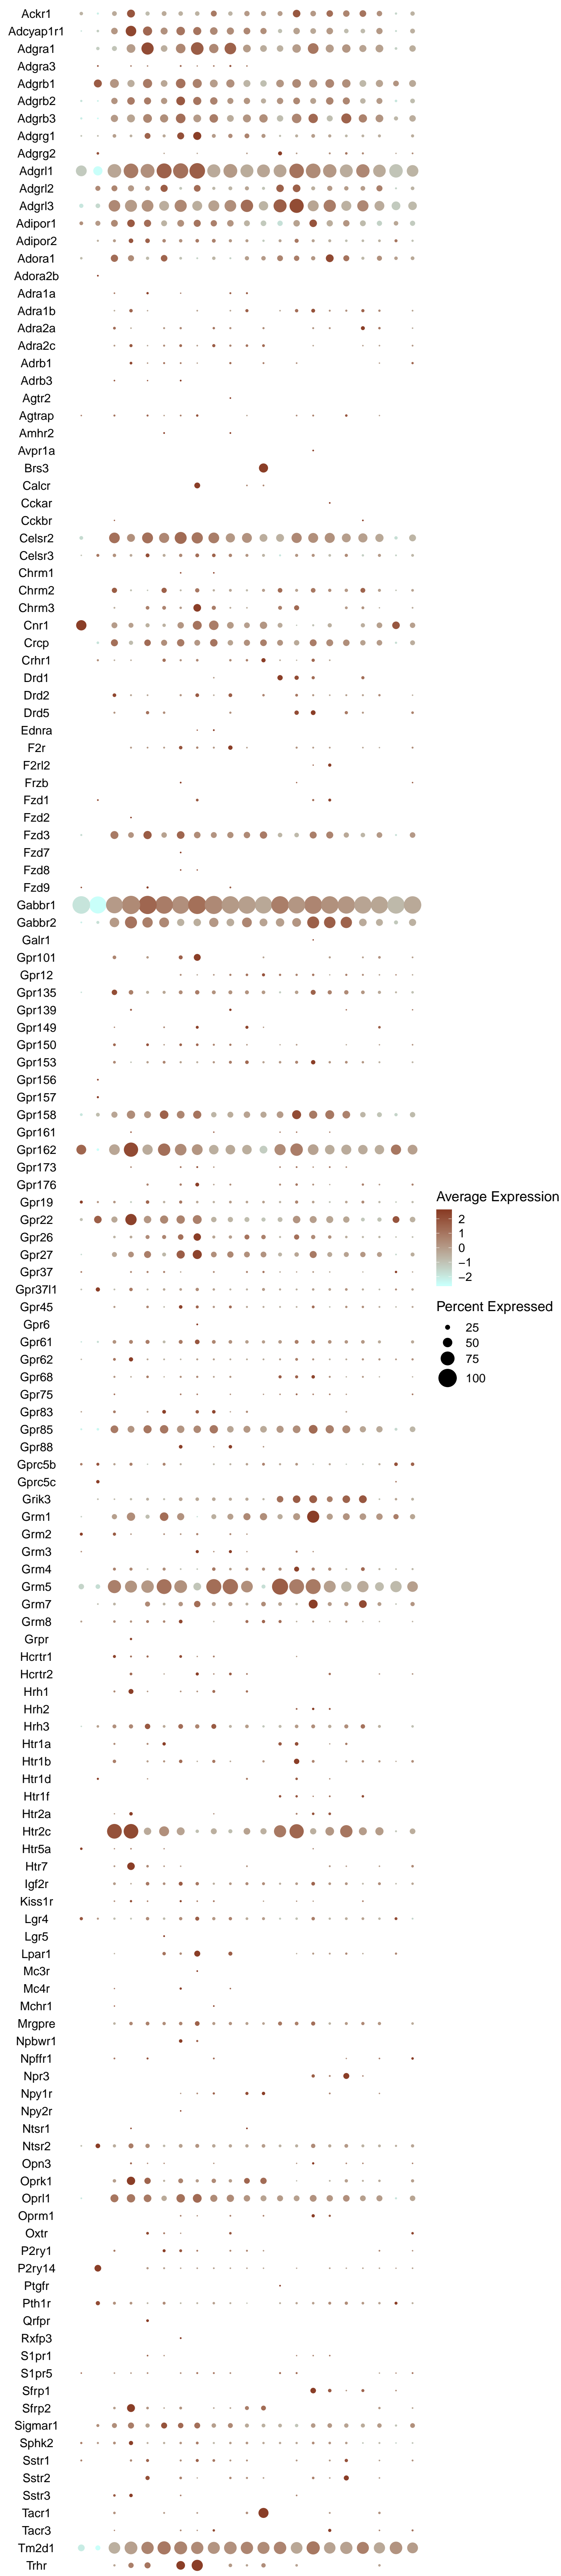

Supplement: supp [file elife-81868-supp-v1.zip]
