# Supplementary material for: Molecular and anatomical characterization of parabrachial neurons and their axonal projections
Source: eLife. 2022 Nov 1;11:e81868. doi: 10.7554/eLife.81868 (PMC9668336; doi:10.7554/eLife.81868)
Supplement: Supplementary file 1. [file elife-81868-supp1.xlsx]

## Sheet: average
	Microglia	VLMCs	Stromal	Astrocytes	Oligodendrocytes	OPCs	Neurons
0610005C13Rik	0	0.00961524	0.000776397	0.00905106	0.00146138	0	0.00691229
0610009B22Rik	0.164483	0.11513	0.192139	0.199975	0.215958	0.248172	0.256629
0610009O20Rik	0.0556869	0.0768474	0.096898	0.0670534	0.0926648	0.0958393	0.0749529
0610010F05Rik	0.0355353	0.00961524	0.0426889	0.0268382	0.0487281	0.0453597	0.147486
0610010K14Rik	0.305504	0.162742	0.22935	0.121734	0.194082	0.15298	0.203627
0610012G03Rik	0.427757	0.548936	0.4826	0.55475	0.482985	0.557619	0.802186
0610030E20Rik	0.11502	0.11513	0.128528	0.0962931	0.117682	0.0952602	0.153972
0610037L13Rik	0.149301	0.153246	0.182983	0.140301	0.181671	0.185668	0.181453
0610038B21Rik	0.00192123	0	0.00155279	0.00062422	0.000417537	0.00116347	0.00180513
0610039K10Rik	0.009606	0	0.00465837	0.000936329	0.000417537	0.0017452	0.0012768
0610040B10Rik	0.0336152	0.0288422	0.0434646	0.0349492	0.0541489	0.0447785	0.0923268
0610040F04Rik	0.00192123	0	0.00310559	0.00187266	0.000835073	0	0.0166857
0610040J01Rik	0.303669	0	0.00621114	0.00717847	0.00365344	0.0395476	0.00475497
0610043K17Rik	0.000960615	0	0.00621114	0.00530584	0.00114822	0.00116347	0.0103903
1010001B22Rik	0.00480306	0	0.0139747	0.0199737	0.0235886	0.0127978	0.0066041
1110002L01Rik	0.0144087	0.00961524	0.0170799	0.0177893	0.0248409	0.0157062	0.0559739
1110002O04Rik	0	0	0	0.00124844	0.00396659	0	0.00167305
1110004E09Rik	0.056646	0.0960063	0.116969	0.0801265	0.0984837	0.0883087	0.142388
1110004F10Rik	0.429515	0.782915	0.70429	0.623066	0.635825	0.723923	0.702394
1110006O24Rik	0.000960615	0	0.00854027	0.0102994	0.0101251	0.00523558	0.00902555
1110008F13Rik	0.425999	0.330489	0.359446	0.374458	0.40569	0.386468	0.32348
1110008L16Rik	0.0172902	0	0.0504444	0.00811477	0.0103338	0.010471	0.0296263
1110008P14Rik	0.287106	0.330489	0.379056	0.415816	0.378575	0.408015	0.671425
1110012L19Rik	0.0547277	0.153246	0.0914872	0.0608239	0.0838266	0.091785	0.111205
1110015O18Rik	0.00288184	0	0.00698752	0.0034332	0.0032359	0.010471	0.0302424
1110017D15Rik	0.00480306	0.0192296	0.0116457	0.012172	0.00751559	0.0157062	0.0812736
1110019D14Rik	0.0144087	0.0576604	0.00931664	0.0199737	0.0205622	0.00988931	0.0176542
1110020A21Rik	0.00288184	0	0.014751	0.00749057	0.0170138	0.00523558	0.00783684
1110032A03Rik	0.109292	0.153246	0.145449	0.143082	0.224009	0.144926	0.270837
1110032F04Rik	0.00480306	0.00961524	0.010093	0.00686636	0.00615863	0.00639903	0.0532923
1110034G24Rik	0.0643168	0.153246	0.145449	0.0648733	0.0682143	0.06743	0.0827216
1110035H17Rik	0.0153692	0.0288422	0.049669	0.00624216	0.00469727	0.0145428	0.0499946
1110038F14Rik	0.191904	0.209992	0.234642	0.160977	0.211162	0.230643	0.162668
1110046J04Rik	0.0182507	0.105573	0.0597471	0.0265262	0.0726917	0.0314084	0.0948693
1110051M20Rik	0.0681509	0.0768474	0.0744653	0.0928752	0.125868	0.165618	0.272705
1110059E24Rik	0.0825192	0.0768474	0.144681	0.118945	0.129906	0.11204	0.212547
1110059G10Rik	0.100694	0.0864308	0.114655	0.0813708	0.125557	0.0958393	0.113042
1110065P20Rik	0.189073	0.375713	0.346298	0.291425	0.528131	0.322479	0.568719
1190002N15Rik	0.0288145	0.00961524	0.0341549	0.030582	0.0767513	0.038385	0.0823267
1190005I06Rik	0.0297747	0.0288422	0.0605221	0.108402	0.482519	0.0517512	0.06573
1190007I07Rik	0.0786892	0.0576604	0.0628468	0.0714124	0.0757105	0.0906263	0.160669
1300002E11Rik	0.0336152	0.0192296	0.078336	0.0371325	0.0764391	0.043035	0.049379
1300014J16Rik	0.0134482	0	0.000776397	0.00218477	0.000626305	0	0.00435872
1300017J02Rik	0.00192123	0	0.000776397	0.00031211	0.000626305	0.00116347	0.00114472
1500002C15Rik	0.00672425	0.0384521	0.00698752	0.00249688	0.00250522	0.0058173	0.017258
1500009C09Rik	0.113111	0.162742	0.122365	0.32893	0.0996263	0.275165	0.588477
1500009L16Rik	0.0671925	0.21939	0.2595	0.0698558	0.0559207	0.112618	0.351416
1500011B03Rik	0.17206	0.429025	0.251231	0.308146	0.377893	0.429383	1.14265
1500011K16Rik	0.323803	0.375713	0.349956	0.354571	0.364427	0.384845	0.422044
1500015A07Rik	0.0115271	0.0288422	0.0217374	0.0252782	0.0189968	0.0110527	0.0816685
1500015L24Rik	0	0	0.00232919	0.00031211	0.0160745	0	0.000352221
1500035N22Rik	0.00288184	0	0.00388198	0.00249688	0.00281837	0.00116347	0.0236847
1520401A03Rik	0	0	0	0.00062422	0.000313152	0	0.00242152
1600002K03Rik	0.0412947	0.0192296	0.0349308	0.0324537	0.0301624	0.0476841	0.0774552
1600010M07Rik	0.056646	0	0.00388198	0.00031211	0.000417537	0	0.000528332
1600012H06Rik	0.0345752	0.0288422	0.0597471	0.0598893	0.0719629	0.0523321	0.0459487
1600014C10Rik	0.0767737	0.0288422	0.0550963	0.0212219	0.0331881	0.0407101	0.146919
1600014C23Rik	0	0	0.000776397	0.00624216	0.000626305	0.00116347	0.00123277
1600020E01Rik	0.0499312	0.0576604	0.102306	0.0592662	0.0716506	0.0616247	0.097455
1700001C02Rik	0	0	0	0.00312109	0.000521921	0.000581734	0.00136486
1700001F09Rik	0	0	0.000776397	0	0.000417537	0.000581734	0.00343415
1700001L05Rik	0.00192123	0	0.000776397	0.000936329	0.000313152	0	0.00224541
1700001L19Rik	0.0508906	0.0288422	0.0504444	0.06207	0.0465385	0.0906263	0.254455
1700001O22Rik	0.00480306	0.0192296	0.00543476	0.00624216	0.00553233	0.0267566	0.0379427
1700003E16Rik	0.00480306	0	0.0077639	0.00530584	0.00490604	0.00698075	0.0503024
1700003F12Rik	0.0355353	0	0.0077639	0.016229	0.00501042	0.00756246	0.0340268
1700003L19Rik	0	0	0	0	0	0.00116347	0.00220138
1700003M07Rik	0.000960615	0	0.000776397	0.00749057	0.00125261	0.000581734	0.00259763
1700007G11Rik	0.000960615	0	0.000776397	0.000936329	0.000730689	0	0.00391845
1700007K13Rik	0.00768484	0.0192296	0.0139747	0.110574	0.0108557	0.0162878	0.0356108
1700008J07Rik	0.0259337	0.0192296	0.020185	0.0159169	0.0215015	0.0157062	0.0269857
1700008O03Rik	0.0105666	0	0.0116457	0.0106115	0.0154482	0.0197777	0.0825461
1700010I14Rik	0.0172902	0.00961524	0.00465837	0.00468163	0.00594986	0.00290866	0.0170379
1700011D18Rik	0	0	0.000776397	0.00062422	0.000835073	0.00116347	0.00356623
1700011I03Rik	0.00864542	0	0	0.00124844	0.00114822	0	0.00268568
1700012B09Rik	0.00576366	0.00961524	0.00388198	0.00405742	0.00417535	0.00290866	0.0379867
1700012C14Rik	0.000960615	0	0.00155279	0.00249688	0.000730689	0.000581734	0.00647202
1700013F07Rik	0	0	0.000776397	0.000936329	0.000313152	0	0.00356623
1700015F17Rik	0.000960615	0	0.000776397	0	0.00135699	0.0017452	0.00422664
1700016D06Rik	0	0	0	0.00031211	0.000521921	0	0.00211333
1700016K19Rik	0.00288184	0	0.00621114	0.00530584	0.00354905	0.0017452	0.0356988
1700017B05Rik	0.241638	0	0.0225136	0.0283982	0.0051148	0.0157062	0.0171699
1700017N19Rik	0	0	0	0.00031211	0.000626305	0.000581734	0.00228944
1700018L02Rik	0.000960615	0.00961524	0.0108694	0.00249688	0.00438412	0.00349039	0.0119312
1700019D03Rik	0.00288184	0	0.00931664	0.0343253	0.053315	0.0656886	0.067619
1700019L13Rik	0.0105666	0	0.0263945	0.00187266	0.0032359	0.00639903	0.0120193
1700020D05Rik	0.000960615	0	0.000776397	0.00280898	0.00250522	0	0.00316999
1700020I14Rik	0.125511	0.153246	0.281217	0.121734	0.134873	0.135709	0.254796
1700020L24Rik	0.00672425	0	0.00310559	0.0034332	0.036422	0.010471	0.00616383
1700021F05Rik	0.0978266	0.0864308	0.130838	0.0941182	0.0880906	0.114352	0.189244
1700021N21Rik	0.000960615	0	0	0.00124844	0.00125261	0	0.00352221
1700023F06Rik	0.0201715	0.00961524	0.0380343	0.0514754	0.0350659	0.0610441	0.214613
1700025G04Rik	0.0508906	0.0480584	0.101534	0.0654962	0.147275	0.308631	0.30086
1700026J14Rik	0.00288184	0	0.00310559	0.00124844	0.00334029	0.00290866	0.00537135
1700027A07Rik	0	0	0.00155279	0.00062422	0.000417537	0	0.00457886
1700028J19Rik	0.00192123	0	0.00232919	0.000936329	0.00240083	0.00698075	0.0038304
1700028K03Rik	0	0.00961524	0.00388198	0.000936329	0.00219206	0	0.0142205
1700028P14Rik	0	0	0	0.00249688	0.000730689	0	0.00906957
1700029I15Rik	0.000960615	0.00961524	0.00543476	0.00717847	0.00219206	0.00523558	0.0139123
1700029J07Rik	0.00192123	0.0288422	0.0077639	0.0411869	0.0178487	0.0145428	0.0382507
1700030C14Rik	0	0	0	0.00062422	0.000521921	0.0017452	0.0066041
1700030J22Rik	0.00672425	0.00961524	0.010093	0.00405742	0.00396659	0.00232693	0.0309905
1700030K09Rik	0.0163297	0.0288422	0.024066	0.0265262	0.0179531	0.0267566	0.0457288
1700031P21Rik	0	0.00961524	0.00310559	0	0.000208768	0	0.00202527
1700034H15Rik	0.00192123	0	0.00155279	0.00031211	0.000626305	0.000581734	0.00616383
1700034I23Rik	0	0	0	0.00062422	0.000208768	0.000581734	0.00123277
1700034P13Rik	0	0	0	0.00031211	0.00250522	0.0017452	0.00136486
1700037C18Rik	0.026894	0.0288422	0.0279467	0.021846	0.0484153	0.0232672	0.065071
1700037H04Rik	0.0643168	0.0480584	0.101534	0.0838592	0.0788327	0.108571	0.365431
1700040D17Rik	0.000960615	0	0.00155279	0.00405742	0.00532357	0.00349039	0.00937775
1700041G16Rik	0.00864542	0.00961524	0.00621114	0.00468163	0.00250522	0.00465385	0.00550343
1700047I17Rik2	0	0	0	0.000936329	0.00532357	0.000581734	0.0020693
1700047M11Rik	0.026894	0.0864308	0.0535458	0.0608239	0.630897	0.151255	0.0272057
1700048O20Rik	0.00480306	0.0192296	0.0116457	0.00717847	0.00521918	0.0139612	0.0539957
1700052K11Rik	0.0182507	0.0384521	0.0263945	0.0102994	0.00908129	0.0133795	0.0498187
1700054M17Rik	0	0	0	0	0.000104384	0	0.00233346
1700055D18Rik	0.0124877	0.00961524	0.00155279	0.00312109	0.0026096	0.000581734	0.0103023
1700056E22Rik	0.00192123	0	0.00232919	0.00249688	0.0032359	0.0017452	0.00541537
1700056N10Rik	0.000960615	0.0192296	0.000776397	0.00031211	0.000730689	0.000581734	0.00290582
1700058P15Rik	0.00672425	0	0.000776397	0.00124844	0.000208768	0.000581734	0.00189319
1700060C20Rik	0	0	0	0.00031211	0.000104384	0	0.00132083
1700061G19Rik	0	0	0.000776397	0.00031211	0.000104384	0	0.00154097
1700063D05Rik	0.0336152	0.0864308	0.0341549	0.021846	0.552195	0.0168695	0.0323107
1700064M15Rik	0.00192123	0	0.000776397	0.00187266	0.00104384	0.000581734	0.00607578
1700065D16Rik	0.00192123	0	0.00155279	0.00062422	0.00125261	0.00290866	0.00673618
1700066B17Rik	0.000960615	0	0	0	0.00334029	0	4.4e-05
1700066B19Rik	0.0364953	0	0.00388198	0.00312109	0.00594986	0.00290866	0.0293622
1700066M21Rik	0.0153692	0.0288422	0.0209612	0.0299581	0.0635272	0.0523321	0.0610285
1700069B07Rik	0	0	0.000776397	0.00031211	0.00396659	0	0.0012768
1700084C06Rik	0.000960615	0	0	0.00031211	0.000521921	0	0.00180513
1700084E18Rik	0.00576366	0	0.00465837	0.0118599	0.00542795	0.00698075	0.00757268
1700086O06Rik	0.0115271	0	0.024066	0.0240301	0.0188924	0.0203593	0.0728014
1700086P04Rik	0.00768484	0	0.000776397	0.0034332	0.00438412	0.0017452	0.0118872
1700088E04Rik	0.00864542	0.0288422	0.012422	0.0259022	0.0118995	0.0110527	0.0514896
1700093K21Rik	0.000960615	0	0.00155279	0.00031211	0.000104384	0.00232693	0.0158493
1700095J03Rik	0.000960615	0	0.00310559	0.00156055	0.000313152	0.00116347	0.00664813
1700096K18Rik	0.0355353	0.00961524	0.0225136	0.0439933	0.0736287	0.0482651	0.0416381
1700102H20Rik	0.00288184	0	0.00155279	0.00624216	0.00229645	0.0017452	0.00444678
1700102P08Rik	0.00192123	0.00961524	0.000776397	0.00124844	0.000626305	0.00116347	0.004799
1700105P06Rik	0.000960615	0	0.00465837	0.00312109	0.00114822	0.00232693	0.0128557
1700109H08Rik	0.00288184	0.00961524	0.00310559	0.00218477	0.000939457	0.000581734	0.00330207
1700112D23Rik	0.00672425	0	0.00388198	0.0034332	0.00668053	0.00349039	0.0128117
1700112J16Rik	0.00480306	0	0.00465837	0.00561795	0.00521918	0.00698075	0.0306385
1700113A16Rik	0.0105666	0.0192296	0.0116457	0.0296461	0.0494579	0.00988931	0.0208676
1700123J17Rik	0	0	0	0.00062422	0.000208768	0.0017452	0.0012768
1700123O20Rik	0.109292	0.134212	0.11774	0.127928	0.154603	0.133979	0.146615
1700124L16Rik	0.00768484	0	0.00854027	0.00655426	0.00647177	0.0116344	0.082239
1700125G22Rik	0	0	0	0.00031211	0	0	0.00123277
1700125H20Rik	0.000960615	0	0.00232919	0.000936329	0.00104384	0	0.00519524
1810009A15Rik	0.00672425	0.0192296	0.0108694	0.00842687	0.0141958	0.00756246	0.0277339
1810010D01Rik	0	0	0.000776397	0.00062422	0.000521921	0.00116347	0.0012768
1810010H24Rik	0.00768484	0.0384521	0.0116457	0.0252782	0.0128389	0.0697515	0.0627423
1810011H11Rik	0.087305	0	0	0	0	0	0.000352221
1810013D15Rik	0	0	0.00232919	0.00749057	0.000521921	0.000581734	0.000572359
1810013L24Rik	0.142647	0.0480584	0.0845266	0.0847922	0.0620687	0.0453597	0.118553
1810019N24Rik	0.00192123	0	0	0	0.000208768	0	0.00396248
1810020O05Rik	0	0	0	0.00031211	0.000313152	0	0.00339012
1810021B22Rik	0.0192111	0.0384521	0.00854027	0.0168531	0.0136739	0.00639903	0.01739
1810022K09Rik	0.211672	0.228769	0.241436	0.194771	0.228995	0.24535	0.345068
1810024B03Rik	0.0182507	0.0960063	0.0170799	0.0205978	0.0223363	0.0139612	0.0092897
1810030O07Rik	0.056646	0.0480584	0.0481181	0.0265262	0.0474769	0.0505892	0.0929844
1810032O08Rik	0.0172902	0	0.0364826	0.0168531	0.0189968	0.0290826	0.0587431
1810037I17Rik	0.723038	0.853914	1.07019	0.948162	1.48181	0.773386	0.679611
1810041H14Rik	0.00576366	0	0.00155279	0.00218477	0.00302713	0.0017452	0.0119752
1810041L15Rik	0.0134482	0.0192296	0.0248422	0.0246542	0.0100207	0.276285	0.166968
1810043G02Rik	0.107382	0.0384521	0.108483	0.0993993	0.208915	0.0969973	0.265823
1810044D09Rik	0.021132	0.00961524	0.0116457	0.0240301	0.02818	0.0122161	0.0199872
1810055G02Rik	0.00576366	0.0384521	0.0294988	0.0293341	0.0377781	0.0529131	0.0332348
1810058I24Rik	0.272318	0.548936	0.345566	0.219214	0.536973	0.24535	0.208412
1810062G17Rik	0.000960615	0	0.00388198	0.00156055	0.00918568	0	0.00171708
1810062O18Rik	0.00192123	0	0	0.00156055	0.00177453	0.0017452	0.0103463
2010005H15Rik	0.00192123	0	0.00310559	0.00031211	0.00156576	0.0017452	0.0135161
2010007H06Rik	0.000960615	0.0384521	0.0170799	0.00686636	0.000208768	0	0.00250957
2010013B24Rik	0.0163297	0	0	0	0.000104384	0.000581734	0.00105666
2010015M23Rik	0.00288184	0.0192296	0.00621114	0.012172	0.00929005	0.0133795	0.0376348
2010107E04Rik	0.908285	1.07728	1.08957	1.24394	1.03896	1.21031	1.12115
2010109A12Rik	0.0124877	0.0384521	0.0232898	0.00811477	0.00542795	0.00756246	0.0419021
2010111I01Rik	0.0355353	0.11513	0.580242	0.0517871	0.172936	0.0807731	0.127074
2010300C02Rik	0.00576366	0.00961524	0.00388198	0.00749057	0.00678492	0.0186144	0.0658178
2010308F09Rik	0	0	0.000776397	0.00124844	0.000730689	0	0.00387442
2010315B03Rik	0.0374552	0.0480584	0.0209612	0.0396276	0.0192055	0.0226857	0.0663011
2010320M18Rik	0.0432142	0.124677	0.090714	0.0832372	0.0526896	0.0714923	0.108448
2200002D01Rik	0.00288184	0	0.077562	0.00062422	0.00114822	0	0.00220138
2210008F06Rik	0.000960615	0	0.00465837	0.00218477	0.00427974	0.000581734	0.0203394
2210011C24Rik	0.021132	0.0384521	0.0186325	0.0168531	0.0386125	0.0319899	0.0339828
2210016F16Rik	0.249097	0.0864308	0.0945794	0.0558386	0.061652	0.0993131	0.159713
2210016L21Rik	0.291714	0.506863	0.408569	0.479536	0.496749	0.543016	0.763636
2210406O10Rik	0.00384245	0	0.00698752	0.00686636	0.0124214	0.0127978	0.0382947
2210408I21Rik	0.00672425	0.00961524	0.0139747	0.0149807	0.0226494	0.0162878	0.0503464
2300009A05Rik	0.0882619	0.0576604	0.171518	0.161593	0.148514	0.156429	0.266418
2310001H17Rik	0.0134482	0.0192296	0.0302749	0.00124844	0.000939457	0.000581734	0.0143525
2310003N18Rik	0.00192123	0	0.00155279	0.000936329	0.000104384	0	0.00334609
2310009B15Rik	0.0987826	0.238128	0.119282	0.150801	0.0970293	0.140319	0.334168
2310011J03Rik	0.1455	0.209992	0.159264	0.0984675	0.268777	0.0790335	0.10941
2310016G11Rik	0	0	0	0.00312109	0.00313152	0.00116347	0.000132083
2310022A10Rik	0.0230527	0.0288422	0.058972	0.0299581	0.0393427	0.0372224	0.106084
2310022B05Rik	0.0920888	0.11513	0.299835	0.634211	0.38635	0.0865701	0.0486314
2310026L22Rik	0	0	0	0.00031211	0.000104384	0	0.0012768
2310030G06Rik	0.000960615	0	0.0248422	0.00124844	0.00240083	0.00232693	0.0213078
2310033P09Rik	0.206032	0.21939	0.1868	0.0925644	0.136631	0.111462	0.222481
2310034G01Rik	0.00768484	0.00961524	0.0077639	0.00717847	0.0115864	0.00639903	0.0271617
2310034O05Rik	0.00192123	0	0.000776397	0.00124844	0.000521921	0	0.00396248
2310035C23Rik	0.0806043	0.143735	0.096898	0.108402	0.133217	0.150105	0.277116
2310039H08Rik	0.0470528	0.228769	0.140069	0.0711011	0.0926648	0.043035	0.101486
2310040G07Rik	0.00288184	0	0.0170799	0.0177893	0.000730689	0.0058173	0.0109186
2310040G24Rik	0.0844337	0.00961524	0.0217374	0.0127962	0.0109601	0.0145428	0.0403184
2310047D07Rik	0.00864542	0	0.000776397	0.00218477	0.00208768	0.00290866	0.00616383
2310057M21Rik	0.0230527	0.0768474	0.0512198	0.0411869	0.051126	0.0401288	0.119864
2310061I04Rik	0.0681509	0.11513	0.126988	0.128238	0.0954708	0.115508	0.266418
2310068J16Rik	0.0105666	0.00961524	0.0077639	0.0131082	0.0186837	0.00407212	0.02813
2310074N15Rik	0.00288184	0.0192296	0.012422	0.0106115	0.0109601	0.0116344	0.0335428
2310075C17Rik	0.00192123	0	0	0	0	0	0.00202527
2410002F23Rik	0.103561	0.105573	0.078336	0.0860361	0.108036	0.162748	0.210393
2410004B18Rik	0.125511	0.134212	0.150057	0.161901	0.295473	0.159302	0.243695
2410004I01Rik	0.00288184	0	0.000776397	0.00187266	0.00177453	0.00523558	0.0196791
2410004P03Rik	0	0	0.000776397	0.00499374	0.000939457	0.000581734	0.00845321
2410015M20Rik	0.668569	0.790169	0.751113	0.907611	0.831504	0.977885	1.30329
2410018L13Rik	0.00480306	0	0.00543476	0.00717847	0.00480165	0.00407212	0.0477958
2410080I02Rik	0.0124877	0.105573	0.0512198	0.0146686	0.0112732	0.0162878	0.0182264
2410089E03Rik	0.0355353	0.067257	0.0767879	0.0966037	0.0573798	0.0993131	0.291838
2410131K14Rik	0.0432142	0.0480584	0.0349308	0.0424342	0.0398642	0.0348969	0.133186
2510002D24Rik	0.0892188	0.0768474	0.159264	0.122044	0.0664438	0.127058	0.266036
2510009E07Rik	0.0499312	0.0288422	0.0829793	0.0411869	0.0998341	0.0604634	0.109192
2510017J16Rik	0.00288184	0	0.0108694	0.00124844	0.00417535	0.00407212	0.0132519
2510039O18Rik	0.116928	0.0576604	0.0760137	0.0262142	0.0769595	0.0587213	0.0769724
2510046G10Rik	0.00768484	0.0384521	0.0504444	0.00936316	0.0194142	0.0116344	0.0253572
2600006K01Rik	0.00192123	0	0.00698752	0.00780267	0.00407097	0.00756246	0.0384707
2600014E21Rik	0.00192123	0	0.00155279	0.000936329	0.000626305	0.0162878	0.0135601
2610001J05Rik	0.400361	0.489796	0.433499	0.406041	0.646928	0.575597	0.425272
2610002M06Rik	0.0278542	0.0192296	0.0566467	0.0333896	0.0409072	0.0476841	0.152841
2610008E11Rik	0.0124877	0.0384521	0.0349308	0.0374444	0.0396556	0.053494	0.062962
2610020C07Rik	0.00384245	0	0.00931664	0.00655426	0.00709806	0.00639903	0.0215279
2610021A01Rik	0.0124877	0.00961524	0.0077639	0.0127962	0.0168051	0.0203593	0.0333228
2610027F03Rik	0	0	0.00310559	0.00405742	0.000521921	0.00116347	0.00528329
2610028E06Rik	0.00288184	0	0.00465837	0.00374531	0.00187891	0.00349039	0.0313426
2610035D17Rik	0.0489718	0.0192296	0.0760137	0.0816819	0.0975488	0.116664	0.13288
2610037D02Rik	0.0623995	0.0288422	0.0318269	0.0471112	0.0318318	0.0250119	0.0883366
2610042L04Rik	0.00384245	0.00961524	0.00388198	0.00062422	0.000835073	0.00116347	0.0110507
2610044O15Rik8	0.021132	0	0.0333789	0.0262142	0.0298494	0.0343155	0.0813614
2610301B20Rik	0.0326551	0.0864308	0.0558715	0.0714124	0.0620687	0.0842517	0.178421
2610318N02Rik	0.00192123	0	0.000776397	0.000936329	0.000313152	0.000581734	0.0091136
2610507B11Rik	0.0978266	0.0480584	0.127758	0.147714	0.125764	0.103364	0.251255
2610524H06Rik	0.0422545	0.0384521	0.0674953	0.0791931	0.0943277	0.154705	0.268458
2610528A11Rik	0.0825192	0	0.000776397	0.00031211	0.000417537	0	0.00105666
2700012I20Rik	0.00672425	0	0.00465837	0.00187266	0.00699368	0.00290866	0.00264166
2700016F22Rik	0.00768484	0.00961524	0.00232919	0.00499374	0.0051148	0.00523558	0.0110067
2700033N17Rik	0.00384245	0.00961524	0.00854027	0.00374531	0.00626301	0.00349039	0.0235526
2700038G22Rik	0.0480123	0	0.0217374	0.0146686	0.0184749	0.0174511	0.0516215
2700046A07Rik	0.00480306	0.0960063	0.046567	0.00811477	0.201555	0.00407212	0.00722047
2700046G09Rik	0.0105666	0	0.020185	0.0290221	0.0441402	0.0139612	0.0497307
2700049A03Rik	0.0182507	0	0.0294988	0.0152928	0.0158657	0.019196	0.0410223
2700062C07Rik	0.0547277	0.0768474	0.0566467	0.0443051	0.0892343	0.062786	0.122967
2700069I18Rik	0	0.0192296	0.000776397	0.00156055	0.00187891	0.00116347	0.0287461
2700081O15Rik	0.0115271	0.0192296	0.0287228	0.0296461	0.00814187	0.0273381	0.0480157
2700097O09Rik	0.0374552	0.0576604	0.058197	0.0854142	0.100873	0.102207	0.158365
2810001G20Rik	0.0480123	0.0576604	0.0814317	0.100642	0.0656105	0.0941019	0.207593
2810004N23Rik	0.171114	0.134212	0.150825	0.174519	0.242299	0.214182	0.250103
2810006K23Rik	0.0460932	0.0960063	0.0620719	0.0393157	0.0474769	0.0575598	0.0839501
2810021J22Rik	0.0172902	0.00961524	0.0186325	0.00967526	0.0113776	0.0139612	0.0362708
2810032G03Rik	0.00384245	0.00961524	0.00465837	0.00624216	0.00396659	0.00465385	0.0450691
2810049E08Rik	0.000960615	0	0.00465837	0.00749057	0.00334029	0.00290866	0.0174341
2810402E24Rik	0.0853909	0.0480584	0.0760137	0.0333896	0.0403857	0.0633665	0.066345
2810403A07Rik	0.056646	0.0864308	0.090714	0.137828	0.053732	0.0790335	0.153972
2810405F17Rik	0.0240131	0.0192296	0.0139747	0.0159169	0.00835063	0.00698075	0.0292742
2810408A11Rik	0.000960615	0	0.00232919	0.00124844	0.00135699	0.00116347	0.000660415
2810414N06Rik	0.00288184	0.00961524	0.00388198	0.00218477	0.0159701	0.00349039	0.0135601
2810425M01Rik	0.00192123	0	0	0.00156055	0.000521921	0.00116347	0.00250957
2810429I04Rik	0.00480306	0	0.0077639	0.0034332	0.0645689	0.00639903	0.024741
2810454H06Rik	0.0528093	0.0864308	0.0930334	0.0124841	0.0185793	0.0476841	0.0834237
2810455O05Rik	0.00480306	0	0	0.000936329	0.00490604	0.00232693	0.0125035
2810457G06Rik	0.00192123	0.0192296	0.0131984	0.00873896	0.00438412	0.00756246	0.0184906
2810459M11Rik	0.00288184	0	0.00310559	0.0377563	0.0038622	0.0255935	0.0147487
2810474O19Rik	0.140745	0.153246	0.107711	0.0527221	0.0582135	0.0610441	0.104901
2900009J06Rik	0.009606	0.0192296	0.0178562	0.00717847	0.00626301	0.00698075	0.0318266
2900011O08Rik	0.1531	0.238128	0.200517	0.268004	0.181774	0.426722	0.782366
2900026A02Rik	0.009606	0	0.189851	0.012172	0.00803749	0.00639903	0.0576443
2900045O20Rik	0.000960615	0	0.00232919	0.00312109	0.00146138	0.00290866	0.0145286
2900052N01Rik	0.0144087	0.00961524	0.014751	0.149875	0.0157614	0.0151245	0.0169058
2900055J20Rik	0.009606	0.0384521	0.0232898	0.00561795	0.0521684	0.0343155	0.171222
2900060B14Rik	0.180573	0.0768474	0.0667207	0.0127962	0.00929005	0.0389663	0.105996
2900072N19Rik	0	0	0.00155279	0	0.000208768	0.000581734	0.00299388
2900076A07Rik	0.0144087	0.0288422	0.0341549	0.0530338	0.0521684	0.0395476	0.0953514
2900079G21Rik	0.0105666	0.00961524	0.00543476	0.00749057	0.00584548	0.0209409	0.0628301
2900089D17Rik	0.009606	0	0.0108694	0.00561795	0.00427974	0.00290866	0.0066041
2900093K20Rik	0.0230527	0.0960063	0.0512198	0.0658077	0.0612352	0.0441974	0.124628
2900097C17Rik	0.325627	0.429025	0.433499	0.467772	0.341546	0.369651	1.23349
3010003L21Rik	0.00384245	0	0.012422	0.00062422	0.00897692	0.00116347	0.00171708
3100002H09Rik	0	0	0	0.00124844	0.00281837	0.0226857	0.0044908
3100003L05Rik	0	0	0	0	0.000208768	0	0.00268568
3110001I22Rik	0.00576366	0	0.00931664	0.00436952	0.00407097	0.00290866	0.00730852
3110002H16Rik	0.0259337	0.0384521	0.0341549	0.0237181	0.0250496	0.0203593	0.042254
3110006O06Rik	0.000960615	0	0	0.00031211	0.000208768	0.000581734	0.00264166
3110009E18Rik	0.0201715	0.0384521	0.0194087	0.0168531	0.0293277	0.0302455	0.0329707
3110021N24Rik	0.00576366	0.0480584	0.0333789	0.0458641	0.0896502	0.0639471	0.152057
3110035E14Rik	0.0105666	0.00961524	0.0108694	0.0249662	0.00887254	0.404257	0.028262
3110040N11Rik	0.0364953	0.0480584	0.0550963	0.0312059	0.0461214	0.0412913	0.1372
3110043O21Rik	0.0480123	0.0384521	0.0372585	0.022158	0.0378824	0.0436162	0.094694
3110045C21Rik	0.000960615	0	0.00465837	0.00468163	0.011482	0.00232693	0.0109627
3110062M04Rik	0.059523	0.0480584	0.096898	0.030582	0.0403857	0.0395476	0.062918
3110070M22Rik	0.00576366	0	0.0194087	0.00468163	0.00751559	0.00407212	0.0131639
3110079O15Rik	0.000960615	0	0	0.00124844	0.000521921	0.00349039	0.00409456
3110082I17Rik	0.031695	0.0384521	0.0450159	0.02247	0.0197273	0.0151245	0.0666965
3110082J24Rik	0.0182507	0.0192296	0.0139747	0.112435	0.117371	0.0127978	0.0127236
3110099E03Rik	0	0	0	0.00031211	0.000104384	0.000581734	0.00114472
3222401L13Rik	0.0825192	0.172224	0.106939	0.108712	0.0861148	0.0697515	0.0684975
3300002I08Rik	0.00288184	0.0192296	0.00155279	0.00593005	0.0104382	0.00698075	0.0116671
3300002P13Rik	0	0	0	0.00062422	0.000313152	0	0.00198124
3632451O06Rik	0.0182507	0.0384521	0.0318269	0.0315179	0.0261974	0.537956	0.171309
3830406C13Rik	0.0767737	0.143735	0.146218	0.138446	0.146655	0.118397	0.212116
3930402G23Rik	0	0	0.00465837	0.000936329	0.000521921	0	0.00171708
4430402I18Rik	0.0124877	0.00961524	0.0860738	0.0561503	0.0100207	0.543016	0.196376
4631405J19Rik	0	0	0.00854027	0.00124844	0.000313152	0	0.00215735
4632404H12Rik	0.00864542	0	0.0116457	0.00998735	0.0133608	0.0127978	0.0357428
4632411P08Rik	0	0.00961524	0.000776397	0.00218477	0.00187891	0.000581734	0.00867334
4632415L05Rik	0.057605	0.0768474	0.078336	0.0947396	0.0715465	0.0877292	0.162321
4632428C04Rik	0.00288184	0	0.00155279	0.00280898	0.00135699	0.00116347	0.0104784
4732414G09Rik	0.00192123	0.0192296	0.00310559	0.00905106	0.00427974	0.00639903	0.0317826
4732419C18Rik	0.000960615	0	0	0	0.00240083	0.000581734	0.00598773
4732440D04Rik	0.00480306	0.00961524	0.0131984	0.0230941	0.00908129	0.00756246	0.0478838
4732463B04Rik	0.000960615	0	0.000776397	0	0.000208768	0.00232693	0.0201193
4732471J01Rik	0.0192111	0	0.00698752	0.00468163	0.00887254	0.00639903	0.0321347
4732491K20Rik	0.0124877	0.0384521	0.0178562	0.0312059	0.0227538	0.0221041	0.0808348
4732496C06Rik	0.00192123	0.00961524	0.010093	0.00405742	0.00657615	0.0058173	0.0495109
4831440D22Rik	0	0	0	0.00062422	0.00125261	0.000581734	0.00277374
4831440E17Rik	0.00192123	0	0.00310559	0.0106115	0.00281837	0.00116347	0.0110507
4833412C05Rik	0.000960615	0	0.00232919	0	0.000730689	0	0.00233346
4833413G10Rik	0.000960615	0.0192296	0.00155279	0.00280898	0.00553233	0.00116347	0.0049751
4833418N02Rik	0.0201715	0	0.00931664	0.00124844	0.00302713	0.00232693	0.0040065
4833420G17Rik	0.0882619	0.067257	0.0914872	0.125761	0.0999379	0.120707	0.144131
4833422C13Rik	0.00480306	0	0.0294988	0.0193496	0.0044885	0.00698075	0.0334548
4833427G06Rik	0	0	0.00232919	0	0.000104384	0	0.00176111
4833439L19Rik	0.154998	0.247466	0.22935	0.168982	0.340856	0.165618	0.233422
4833445I07Rik	0.201327	0	0.00388198	0.00218477	0.00156576	0.00290866	0.0197231
4921504A21Rik	0.00192123	0.00961524	0.00232919	0.0106115	0.0264061	0.00639903	0.0317386
4921507P07Rik	0	0.00961524	0.00388198	0.00031211	0.000730689	0.00116347	0.00871736
4921516A02Rik	0.000960615	0	0	0	0.00114822	0.00116347	0.00374234
4921524J17Rik	0.0882619	0.143735	0.186037	0.0682989	0.0769595	0.109149	0.148052
4922502N22Rik	0.000960615	0	0	0.000936329	0.000626305	0.0139612	0.000572359
4930402H24Rik	0.0786892	0.209992	0.151593	0.568718	0.375361	0.170207	0.270837
4930403P22Rik	0.00480306	0	0.00543476	0.00405742	0.00271398	0.0058173	0.0134721
4930404N11Rik	0.00576366	0	0.00465837	0.00062422	0.00104384	0.00349039	0.0121073
4930408O17Rik	0.000960615	0	0	0	0.00292275	0	0.00154097
4930412M03Rik	0	0	0.000776397	0.000936329	0.00146138	0	0.000968608
4930413F20Rik	0	0	0.000776397	0.00062422	0.000104384	0.00290866	0.0123274
4930426D05Rik	0.00480306	0.0192296	0.00931664	0.00655426	0.00542795	0.00698075	0.0473121
4930426I24Rik	0.00288184	0.0192296	0.010093	0.00655426	0.00730682	0.00290866	0.00418261
4930426L09Rik	0.00480306	0	0.00310559	0.000936329	0.00542795	0.00116347	0.00184916
4930430F08Rik	0.0307348	0.00961524	0.0442402	0.0595777	0.0824743	0.0558174	0.087591
4930432K21Rik	0.000960615	0.00961524	0.00388198	0.00156055	0.00375782	0.00116347	0.00906957
4930434B07Rik	0	0	0	0	0	0	0.00149694
4930444M15Rik	0.000960615	0	0.00543476	0.00031211	0.000417537	0.0122161	0.0192829
4930444P10Rik	0.00192123	0	0	0.00124844	0.0019833	0.00465385	0.0146607
4930447C04Rik	0.00288184	0.0192296	0.0108694	0.00436952	0.0026096	0.0093076	0.116148
4930451I11Rik	0	0	0	0	0.000313152	0.000581734	0.00281777
4930452B06Rik	0.00384245	0	0.0077639	0.00499374	0.00334029	0.00349039	0.0292742
4930452G13Rik	0	0	0.00155279	0	0.0109601	0.00872589	0.00330207
4930453N24Rik	0.0364953	0.0576604	0.0535458	0.0333896	0.0633188	0.0372224	0.0689367
4930455G09Rik	0.00576366	0	0.00388198	0.00124844	0.0188924	0	0.00823308
4930458D05Rik	0.00192123	0.00961524	0.00232919	0.00187266	0.000626305	0.000581734	0.011491
4930461C15Rik	0	0.00961524	0	0.000936329	0.00271398	0.000581734	0.00272971
4930480K23Rik	0.00288184	0	0.00388198	0.00405742	0.00313152	0.00523558	0.00620786
4930481A15Rik	0.0432142	0.0192296	0.0426889	0.0321418	0.0494579	0.0122161	0.0265896
4930484H19Rik	0	0	0	0.00062422	0.000104384	0	0.00198124
4930488L21Rik	0.000960615	0	0.000776397	0.00530584	0.00782873	0.00232693	0.0159814
4930500F10Rik	0	0	0.00155279	0	0.00125261	0	0.00801295
4930500L23Rik	0.00288184	0.00961524	0.00310559	0.00561795	0.00271398	0.00523558	0.0367988
4930500M09Rik	0	0	0.00155279	0.00031211	0.000208768	0	0.00211333
4930502E18Rik	0.000960615	0	0.000776397	0.00062422	0.000521921	0	0.00422664
4930503L19Rik	0.00768484	0.00961524	0.0519952	0.012172	0.0191011	0.0186144	0.0276899
4930507D05Rik	0.00192123	0	0.00155279	0.000936329	0.000835073	0.00232693	0.00972996
4930509G22Rik	0.00192123	0	0.00155279	0.00156055	0.000626305	0.00116347	0.00515121
4930513N10Rik	0.00288184	0.00961524	0.0139747	0.00031211	0.000521921	0	0.0106985
4930515G01Rik	0.000960615	0	0.00465837	0	0.00156576	0.00232693	0.00576759
4930518I15Rik	0.00768484	0	0.0108694	0.0171652	0.00584548	0.00814418	0.0296263
4930519A11Rik	0.000960615	0	0	0	0.000313152	0	0.00343415
4930522L14Rik	0.00768484	0.00961524	0.0163036	0.00593005	0.0173269	0.0145428	0.0138242
4930523C07Rik	0.0220923	0.067257	0.71903	0.0290221	0.0032359	0.0133795	0.00453483
4930524B15Rik	0.00192123	0	0.00155279	0.000936329	0.000521921	0	0.00603175
4930524J08Rik	0.00480306	0	0.00465837	0.00749057	0.00699368	0.00232693	0.0163776
4930524O07Rik	0.00384245	0	0	0.00249688	0.000835073	0.000581734	0.00387442
4930525G20Rik	0	0	0.000776397	0.000936329	0.000521921	0.000581734	0.00334609
4930528G23Rik	0	0	0	0	0	0	0.001585
4930532G15Rik	0.021132	0.0480584	0.0574219	0.00842687	0.00636739	0.0651082	0.116454
4930537H20Rik	0.0192111	0	0.00155279	0.00062422	0.000417537	0.00349039	0.0059437
4930539E08Rik	0.00192123	0.00961524	0.00155279	0.00031211	0.000939457	0.000581734	0.0201633
4930539J05Rik	0.0345752	0	0.00931664	0.00561795	0.0155526	0.0093076	0.0210877
4930540M05Rik	0	0	0	0.00031211	0.000208768	0	0.00132083
4930544F09Rik	0	0	0	0.00031211	0.000417537	0	0.0040065
4930548H24Rik	0	0	0.00155279	0.000936329	0	0.00290866	0.00233346
4930550C14Rik	0.000960615	0	0.00310559	0.00436952	0.0038622	0.00116347	0.00118875
4930553P18Rik	0.00384245	0	0.00388198	0.00405742	0.00407097	0.00349039	0.0209116
4930555F03Rik	0	0	0	0	0.000313152	0.00116347	0.00228944
4930558K02Rik	0.00288184	0	0.00232919	0.00062422	0.000939457	0.00639903	0.0100822
4930565N06Rik	0	0	0	0.00062422	0.000521921	0.00116347	0.000924581
4930568G15Rik	0.000960615	0	0	0.00031211	0.000104384	0	0.00457886
4930570G19Rik	0.009606	0.00961524	0.00698752	0.02247	0.0162832	0.0244304	0.0809664
4930572G02Rik	0.00192123	0	0	0.000936329	0.00396659	0.000581734	0.00237749
4930579G24Rik	0.00384245	0.0288422	0.0131984	0.00499374	0.0299538	0.010471	0.00986203
4930589L23Rik	0.00288184	0	0.00232919	0.00124844	0.000939457	0.00407212	0.00550343
4930590J08Rik	0	0	0.00621114	0.00156055	0.00167015	0.00349039	0.013296
4930592C13Rik	0	0	0	0.00031211	0.000521921	0	0.00272971
4930593C16Rik	0	0	0.00155279	0	0.000835073	0	0.00427067
4930594M22Rik	0	0.0288422	0.000776397	0.00187266	0.000208768	0	0.0012768
4930598A11Rik	0	0	0.000776397	0	0	0	0.00180513
4931406C07Rik	0.0844337	0.0576604	0.058197	0.0664305	0.0800814	0.0604634	0.0668722
4931406P16Rik	0.0537685	0.0864308	0.313918	0.0717238	0.270086	0.106836	0.109367
4931414P19Rik	0.00480306	0	0.0139747	0.00780267	0.00521918	0.00988931	0.0103903
4931423N10Rik	0	0	0	0	0.000104384	0	0.00136486
4931428F04Rik	0.0105666	0.0192296	0.012422	0.0156049	0.0137783	0.0343155	0.101267
4931440F15Rik	0.00192123	0	0.00155279	0.00405742	0.00208768	0.00349039	0.0228924
4931440J10Rik	0.000960615	0	0.000776397	0	0.000104384	0.000581734	0.000968608
4932422M17Rik	0.0192111	0.00961524	0.0155273	0.00624216	0.00626301	0.0093076	0.0356548
4932435O22Rik	0	0	0.00310559	0	0.00459289	0.000581734	0.00189319
4932438A13Rik	0.066234	0.153246	0.113113	0.103436	0.110526	0.137438	0.366008
4932438H23Rik	0.00288184	0	0.00543476	0.0358849	0.00553233	0.0017452	0.0049751
4932443I19Rik	0.00192123	0	0.00232919	0.0262142	0.00281837	0.00349039	0.0159373
4932443L11Rik	0.000960615	0	0.000776397	0.00062422	0.000417537	0.00290866	0.0020693
4932702P03Rik	0	0	0.00232919	0.00031211	0.000208768	0	0.00268568
4933402D24Rik	0.000960615	0	0	0	0.000104384	0	0.00184916
4933404O12Rik	0.00384245	0.00961524	0.00621114	0.00686636	0.0110645	0.00988931	0.0375028
4933405L10Rik	0.000960615	0	0	0.00312109	0.000835073	0	0.00378637
4933406C10Rik	0.00384245	0	0.00155279	0.00312109	0.00626301	0.00349039	0.0131639
4933406I18Rik	0.00576366	0	0	0.00031211	0.000417537	0.00349039	0.00950983
4933406P04Rik	0.00768484	0.0192296	0.00698752	0.000936329	0.00208768	0.000581734	0.00792489
4933407L21Rik	0.00576366	0.0288422	0.00931664	0.0268382	0.00563671	0.0139612	0.0340708
4933408B17Rik	0.000960615	0.0192296	0.00388198	0.00405742	0.00104384	0.00465385	0.0176982
4933408J17Rik	0	0	0.000776397	0	0	0	0.00171708
4933412O06Rik	0	0	0	0.00031211	0.000417537	0.00232693	0.0136922
4933415A04Rik	0.000960615	0	0.00155279	0.00374531	0.00657615	0.00523558	0.00132083
4933417D19Rik	0	0	0	0.000936329	0.00156576	0.0017452	0.00233346
4933424G06Rik	0.00192123	0.00961524	0	0.00156055	0.000730689	0.00407212	0.0135161
4933427D14Rik	0.0163297	0.0192296	0.0263945	0.021846	0.0195186	0.0145428	0.0778064
4933427E11Rik	0	0	0.000776397	0.00031211	0.000313152	0.00116347	0.00074847
4933428P19Rik	0.00192123	0.00961524	0.00232919	0.000936329	0.000208768	0.00290866	0.00884944
4933429H19Rik	0	0.00961524	0.00388198	0.00124844	0.00135699	0.00349039	0.00334609
4933431E20Rik	0.0230527	0.0768474	0.0512198	0.113985	0.243312	0.0726528	0.110986
4933433G15Rik	0.0614407	0	0.00310559	0.00124844	0.000835073	0.0017452	0.00427067
4933434E20Rik	0.212612	0.303033	0.190614	0.241406	0.374094	0.279085	0.40913
5031425E22Rik	0.321065	0.143735	0.183747	0.153886	0.0731081	0.0714923	0.174866
5031425F14Rik	0.00576366	0	0.00698752	0.00686636	0.00490604	0.0093076	0.0613361
5031439G07Rik	0.176791	0.153246	0.147754	0.743792	0.556343	0.121285	0.193351
5033403F01Rik	0.000960615	0	0.000776397	0.000936329	0.00177453	0.00116347	0.00537135
5033406O09Rik	0.00192123	0.00961524	0.0108694	0.00312109	0.0133608	0.00116347	0.0238167
5033417F24Rik	0.00288184	0.00961524	0.00465837	0.00499374	0.00647177	0.00116347	0.0215279
5033421B08Rik	0.00192123	0	0.00155279	0	0.00563671	0	0.000352221
5033426O07Rik	0.0134482	0.0192296	0.00388198	0.0152928	0.0026096	0.254937	0.00440275
5033430I15Rik	0.0182507	0.00961524	0.0217374	0.0159169	0.0115864	0.0162878	0.0837308
5330413P13Rik	0.000960615	0	0.00155279	0.00031211	0.0019833	0.000581734	0.0114029
5330416C01Rik	0	0	0.000776397	0	0.000104384	0.00639903	0.00224541
5330417C22Rik	0.00480306	0.0192296	0.00388198	0.00374531	0.00313152	0.00872589	0.159713
5330434G04Rik	0.0153692	0.0288422	0.0380343	0.0271502	0.0527938	0.083672	0.415373
5330439A09Rik	0	0	0	0.00062422	0.000208768	0	0.00167305
5430402O13Rik	0	0	0.00310559	0.0034332	0.0044885	0.00232693	0.00484302
5430403G16Rik	0.00672425	0	0.0116457	0.00499374	0.00584548	0.0139612	0.0110507
5430416N02Rik	0.0153692	0.0192296	0.0178562	0.0115478	0.0267192	0.0186144	0.0535121
5430421F17Rik	0	0.00961524	0.000776397	0	0.000104384	0	0.000924581
5430427N15Rik	0	0	0	0.00468163	0.000939457	0	0.000264166
5430431A17Rik	0.00192123	0	0.000776397	0.00187266	0.00918568	0.00465385	0.00695631
5530401A14Rik	0	0.00961524	0.000776397	0.00031211	0	0	0.00501913
5730403I07Rik	0.000960615	0.00961524	0.00155279	0	0.0234843	0	0.00264166
5730409E04Rik	0.0508906	0.0480584	0.0721424	0.0564619	0.0584219	0.0511702	0.157061
5730422E09Rik	0.00192123	0	0	0.00124844	0.000313152	0	0.00506316
5730455P16Rik	0.0528093	0.067257	0.061297	0.075459	0.0905859	0.0796134	0.208283
5730480H06Rik	0.0326551	0.0480584	0.0395859	0.0414987	0.0419501	0.0337341	0.0683657
5730507C01Rik	0.000960615	0.00961524	0.000776397	0.00031211	0.000730689	0.0017452	0.00453483
5730522E02Rik	0.00192123	0	0	0.000936329	0.000104384	0.00232693	0.00858529
5730559C18Rik	0.000960615	0	0.00388198	0.00624216	0.0026096	0.0975763	0.00475497
5830418P13Rik	0	0	0	0	0	0	0.00211333
5830454E08Rik	0.00480306	0.00961524	0.0263945	0.0165411	0.0157614	0.0151245	0.0430018
5830473C10Rik	0	0	0	0.00031211	0	0	0.00105666
5930412G12Rik	0.00384245	0	0.020185	0.0252782	0.00313152	0.00349039	0.00528329
5930422O12Rik	0	0	0	0.00062422	0.000417537	0.00116347	0.00475497
5930430L01Rik	0.009606	0.0960063	0.0488936	0.0857252	0.0147176	0.0296641	0.058831
6030407O03Rik	0.00192123	0	0	0.000936329	0.0303711	0.00232693	0.00228944
6030408B16Rik	0	0	0.000776397	0.00062422	0.000730689	0.00116347	0.00268568
6030419C18Rik	0.0278542	0.0288422	0.0326029	0.0520988	0.0269279	0.0749734	0.203066
6030443J06Rik	0.00192123	0.00961524	0.000776397	0.00655426	0.0044885	0.010471	0.00854126
6030445D17Rik	0	0	0.0077639	0.000936329	0.000521921	0.000581734	0.004799
6030458C11Rik	0.0259337	0.0576604	0.0310509	0.0617585	0.038091	0.0680104	0.133753
6230400D17Rik	0.00384245	0.0192296	0.0170799	0.0184134	0.0108557	0.0127978	0.042122
6330403K07Rik	1.30922	1.65435	1.49387	1.81548	1.29365	1.96867	2.56705
6330403L08Rik	0.0105666	0.0192296	0.0263945	0.00218477	0.0165963	0.00349039	0.0259294
6330403N20Rik	0.00288184	0	0.000776397	0.00031211	0.000208768	0	0.00162902
6330409D20Rik	0.00288184	0.00961524	0.00232919	0.00218477	0.00334029	0.00349039	0.028306
6330418K02Rik	0.0403349	0.00961524	0.0302749	0.0246542	0.0258844	0.026175	0.0730649
6330420H09Rik	0	0	0	0	0.000417537	0	0.00171708
6330562C20Rik	0.00480306	0.0384521	0.0302749	0.0115478	0.0361091	0.0110527	0.0309025
6330576A10Rik	0	0.00961524	0	0.00124844	0.000417537	0.00116347	0.00228944
6430503K07Rik	0.00864542	0	0.0131984	0.042746	0.0807057	0.0302455	0.00603175
6430531B16Rik	0.000960615	0	0.00155279	0.00593005	0.00125261	0.00116347	0.0149688
6430548M08Rik	0.0374552	0.0288422	0.0527705	0.0530338	0.0591513	0.0593021	0.257864
6430550D23Rik	0.00288184	0.00961524	0	0.00405742	0.00250522	0.00116347	0.00427067
6430571L13Rik	0	0	0.00232919	0.00312109	0.00177453	0.00232693	0.0240368
6430573F11Rik	0.00576366	0.00961524	0.0302749	0.086969	0.0138826	0.0162878	0.0466084
6430573P05Rik	0.00768484	0.00961524	0.0077639	0.00218477	0.00354905	0.00349039	0.00669215
6430584L05Rik	0	0	0.000776397	0.00062422	0.000104384	0.00116347	0.00162902
6430628N08Rik	0.00192123	0	0.00155279	0.00156055	0.000417537	0.00232693	0.0216599
6430710C18Rik	0	0	0	0	0	0	0.00294985
6530403H02Rik	0	0	0.00232919	0	0.000417537	0	0.013384
6530409C15Rik	0.00288184	0	0.00310559	0.00187266	0.0266148	0.00349039	0.00893749
6530437J22Rik	0.00288184	0	0.00155279	0.00156055	0.00271398	0.00290866	0.0123274
6720427I07Rik	0.00480306	0	0.0077639	0.0240301	0.00334029	0.00698075	0.0236847
6720483E21Rik	0.000960615	0	0.00388198	0.00499374	0.00292275	0.000581734	0.00893749
6720489N17Rik	0.00288184	0.00961524	0.00155279	0.00405742	0.00636739	0.00349039	0.0109627
6820408C15Rik	0.000960615	0	0.00543476	0.00156055	0.00354905	0.00290866	0.0213958
8030423F21Rik	0.000960615	0	0.000776397	0.00124844	0.000417537	0.00232693	0.00466691
8030462N17Rik	0.00384245	0	0.00465837	0.00156055	0.00240083	0.000581734	0.00378637
8430408G22Rik	0.000960615	0	0.145449	0.00062422	0.000939457	0	0.00110069
8430432A02Rik	0.00288184	0	0.00310559	0.00156055	0.00156576	0.00290866	0.00541537
9030025P20Rik	0.00864542	0.0192296	0.00698752	0.00998735	0.0136739	0.019196	0.0266336
9030612E09Rik	0.00384245	0.0192296	0.000776397	0.00280898	0.00292275	0.00756246	0.0222761
9030624G23Rik	0	0.00961524	0.0155273	0.00124844	0.00135699	0.000581734	0.00788087
9030624J02Rik	0.112157	0.11513	0.100761	0.0860361	0.10108	0.0929435	0.145177
9130008F23Rik	0.000960615	0.0192296	0.0225136	0.00062422	0	0.000581734	0.00171708
9130011E15Rik	0.00288184	0	0.00543476	0.000936329	0.00313152	0.00290866	0.00730852
9130019O22Rik	0.0105666	0	0.010093	0.00405742	0.00730682	0.00872589	0.0156292
9130023H24Rik	0.00768484	0	0.0139747	0.00717847	0.00876815	0.00756246	0.00796892
9130213A22Rik	0.00192123	0	0.00155279	0.00405742	0.000835073	0.00465385	0.00620786
9130221H12Rik	0.00768484	0	0.0131984	0.00561795	0.00626301	0.00465385	0.0176982
9130230L23Rik	0.0115271	0	0.000776397	0.000936329	0.000417537	0	0.00171708
9130401M01Rik	0.0633582	0.0768474	0.102306	0.0751477	0.102223	0.124749	0.181453
9130410C08Rik	0	0	0.000776397	0	0	0	0.00140888
9130604C24Rik	0.00576366	0.00961524	0.0139747	0.00655426	0.0127345	0.00523558	0.0169498
9230104M06Rik	0.00192123	0	0.000776397	0.000936329	0.00219206	0.00116347	0.00171708
9230110C19Rik	0.000960615	0	0	0.00468163	0.00146138	0.00349039	0.015189
9230111E07Rik	0.000960615	0	0.00310559	0.00218477	0.000417537	0.00232693	0.00272971
9230112J17Rik	0	0	0.012422	0.00031211	0.000104384	0	0.000924581
9330020H09Rik	0.0220923	0.00961524	0.0256183	0.0237181	0.0145089	0.0180328	0.0437495
9330102E08Rik	0.00192123	0	0	0.000936329	0.00114822	0.00116347	0.00999411
9330104G04Rik	0.00576366	0.0192296	0.00698752	0.00187266	0.018788	0.00756246	0.0459487
9330111N05Rik	0.000960615	0	0.000776397	0	0.0051148	0	0.000924581
9330121J05Rik	0.00192123	0	0.00155279	0.0152928	0.00187891	0.00465385	0.00440275
9330136K24Rik	0	0	0.00310559	0.00530584	0.00146138	0.00349039	0.0125476
9330158H04Rik	0.00576366	0.00961524	0.0077639	0.00499374	0.00469727	0.00465385	0.0593145
9330159F19Rik	0.026894	0.00961524	0.0512198	0.113675	0.169027	0.165618	0.261399
9330160F10Rik	0.0489718	0.0288422	0.0263945	0.0174773	0.0118995	0.0127978	0.0728014
9330161L09Rik	0.000960615	0	0	0.00031211	0.000313152	0.00232693	0.0038304
9330171B17Rik	0.000960615	0	0.000776397	0.000936329	0.000835073	0.000581734	0.0111388
9330179D12Rik	0.00576366	0	0.00621114	0.00530584	0.00407097	0.0122161	0.0332348
9330182L06Rik	0.00768484	0	0.014751	0.00873896	0.0657147	0.0314084	0.124933
9330198I05Rik	0	0	0.00155279	0.00062422	0.000208768	0.000581734	0.00286179
9330198N18Rik	0	0	0.00155279	0.00062422	0.000730689	0	0.00250957
9330199G10Rik	0.00288184	0	0.000776397	0.00218477	0.0295364	0	0.00110069
9430002A10Rik	0	0	0	0.00031211	0.00104384	0	0.00193721
9430015G10Rik	0.0144087	0	0.020185	0.0152928	0.0143001	0.0168695	0.0473121
9430037G07Rik	0.000960615	0	0.000776397	0.00218477	0.000730689	0.000581734	0.00638397
9430038I01Rik	0.039375	0.0384521	0.0566467	0.0243422	0.0403857	0.0372224	0.0733723
9430041J12Rik	0.000960615	0	0.00388198	0.0542805	0.00354905	0.00349039	0.0198992
9430060I03Rik	0.0623995	0.00961524	0.0333789	0.00905106	0.0101251	0.0116344	0.0789037
9430065F17Rik	0.00288184	0	0.00465837	0.0118599	0.0180575	0.00814418	0.0183585
9430078K24Rik	0	0	0	0.00031211	0	0.000581734	0.00259763
9430085M18Rik	0.00192123	0.00961524	0.00155279	0.00062422	0.000730689	0.00116347	0.0043147
9430097D07Rik	0	0	0.000776397	0.00031211	0.000521921	0	0.00669215
9530026P05Rik	0.00288184	0.0576604	0.0194087	0.0112357	0.00208768	0.00290866	0.0223642
9530034E10Rik	0.0124877	0	0.0442402	0.00967526	0.0287017	0.0151245	0.0198111
9530036O11Rik	0	0	0.00232919	0.00062422	0.00146138	0.010471	0.0292742
9530046B11Rik	0	0	0	0.00156055	0.000208768	0.00116347	0.00316999
9530059O14Rik	0.0105666	0.0192296	0.024066	0.00749057	0.0567545	0.0894676	0.324483
9530068E07Rik	0.182463	0.228769	0.185274	0.110574	0.194697	0.198804	0.301029
9530077C05Rik	0.0163297	0.0288422	0.0263945	0.0321418	0.0194142	0.0343155	0.088205
9530082P21Rik	0.0124877	0	0.0310509	0.0143566	0.0111689	0.0180328	0.0453329
9630001P10Rik	0	0	0	0.00031211	0.000626305	0.00232693	0.00783684
9630002D21Rik	0	0	0	0	0.000417537	0	0.00136486
9630009A06Rik	0.000960615	0.00961524	0.00232919	0.00124844	0.023693	0	0.000660415
9630013A20Rik	0.000960615	0	0.00232919	0.000936329	0.00407097	0.062786	0.00211333
9630028H03Rik	0	0	0	0.00031211	0	0	0.00176111
9630041A04Rik	0	0	0.000776397	0.00031211	0.000835073	0.000581734	0.000704442
9930004E17Rik	0.000960615	0	0.00388198	0.00062422	0.000208768	0	0.00233346
9930012K11Rik	0.00384245	0.0192296	0.0232898	0.00405742	0.0109601	0.00116347	0.0253572
9930021J03Rik	0.059523	0.0960063	0.096898	0.074214	0.113742	0.10105	0.223555
9930104L06Rik	0.00480306	0.0192296	0.0194087	0.0109236	0.0191011	0.00872589	0.0432657
9930111J21Rik2	0.0940017	0.00961524	0.0674953	0	0.000521921	0	0.000528332
A030001D20Rik	0.0144087	0.0288422	0.0209612	0.0215339	0.0227538	0.0354783	0.102186
A030005L19Rik	0	0	0.00155279	0.00124844	0.000521921	0.00407212	0.00347818
A130010J15Rik	0.0307348	0.0192296	0.0349308	0.0196617	0.0153439	0.0412913	0.0506542
A130051J06Rik	0.00192123	0.00961524	0.00155279	0.00062422	0	0	0.00259763
A130077B15Rik	0.0163297	0	0	0	0.000521921	0.00116347	0.00237749
A230001M10Rik	0.00768484	0.00961524	0.010093	0.00280898	0.125246	0.0017452	0.00290582
A230005M16Rik	0.00192123	0	0	0.000936329	0.000626305	0.0017452	0.0066041
A230006K03Rik	0.00480306	0.00961524	0.00388198	0.00593005	0.00407097	0.00698075	0.162408
A230009B12Rik	0.0115271	0.0480584	0.0186325	0.00312109	0.169027	0.00465385	0.00523927
A230020J21Rik	0.000960615	0	0	0	0.000313152	0.000581734	0.00136486
A230050P20Rik	0.0604819	0.134212	0.0822055	0.0785708	0.0434102	0.116086	0.311371
A230057D06Rik	0.0105666	0	0.014751	0.0283982	0.0192055	0.062786	0.192703
A230060F14Rik	0.000960615	0	0.000776397	0.00031211	0.00187891	0.00232693	0.00286179
A230065N10Rik	0	0	0.00621114	0.00062422	0.000417537	0.00407212	0.00484302
A230072E10Rik	0.00192123	0	0.00155279	0.00624216	0.00344467	0.0017452	0.0263255
A230077H06Rik	0.00192123	0	0.000776397	0.00124844	0.000939457	0.0250119	0.01334
A230083G16Rik	0.000960615	0	0	0.00280898	0.00208768	0.00232693	0.0061198
A230083N12Rik	0.00192123	0	0.00310559	0.00156055	0.000626305	0.00116347	0.00501913
A230087F16Rik	0.00384245	0	0.00621114	0.00218477	0.00177453	0.0145428	0.106303
A230107N01Rik	0.00288184	0	0.00310559	0.00561795	0.00208768	0.00349039	0.0101702
A2m	0.00192123	0.0192296	0.00232919	0.0365087	0.00156576	0.00116347	0.00202527
A2ml1	0.0968705	0.143735	0.119282	0.156045	0.0958864	0.173646	0.168097
A330008L17Rik	0.000960615	0	0.00465837	0.00374531	0.00396659	0.00698075	0.0330587
A330009N23Rik	0.00384245	0	0.0333789	0.00405742	0.00521918	0.0058173	0.0322227
A330015K06Rik	0.00480306	0	0.00698752	0.00124844	0.0770636	0.0017452	0.00233346
A330032B11Rik	0	0	0	0.000936329	0.000939457	0	0.00233346
A330033J07Rik	0	0	0.000776397	0.00031211	0.000313152	0.000581734	0.00435872
A330035P11Rik	0.00480306	0	0.00232919	0.00062422	0.00146138	0.000581734	0.00215735
A330041J22Rik	0.00768484	0	0.00698752	0.02247	0.00761997	0.0093076	0.0447172
A330048O09Rik	0.000960615	0.00961524	0.00621114	0.0361968	0.00396659	0.00290866	0.00823308
A330049N07Rik	0.00192123	0.00961524	0.00232919	0.00031211	0.0390298	0.0017452	0.001585
A330069E16Rik	0.0412947	0.0960063	0.058972	0.0605124	0.065923	0.06743	0.320886
A330069K06Rik	0	0	0	0.00031211	0.000313152	0	0.00132083
A330070K13Rik	0.000960615	0	0.000776397	0.00062422	0.000835073	0	0.00440275
A330074K22Rik	0.000960615	0	0.00310559	0.00312109	0.00135699	0.000581734	0.0142205
A330076C08Rik	0.0105666	0.0192296	0.0217374	0.254425	0.0121083	0.00639903	0.0156292
A330084C13Rik	0.00288184	0.00961524	0.00155279	0.00062422	0.00125261	0.00116347	0.0162015
A330087D11Rik	0.000960615	0	0.00155279	0.022158	0.000417537	0.0017452	0.000880553
A330094K24Rik	0.000960615	0	0.000776397	0.00062422	0.000104384	0.00116347	0.00237749
A330102I10Rik	0.009606	0.0288422	0.00854027	0.00717847	0.00751559	0.0348969	0.0526328
A430005L14Rik	0.130275	0.238128	0.188326	0.0872799	0.133321	0.125326	0.207119
A430027H14Rik	0.00384245	0	0.00543476	0.00936316	0.00365344	0.0290826	0.062215
A430033K04Rik	0.0134482	0	0.0194087	0.0205978	0.0165963	0.0255935	0.0626983
A430046D13Rik	0.0182507	0.00961524	0.0333789	0.0202858	0.0244235	0.0145428	0.0531604
A430057M04Rik	0.00480306	0	0.00155279	0.00031211	0.000313152	0.000581734	0.00457886
A430073D23Rik	0	0	0.00310559	0.00624216	0.00250522	0.00523558	0.00242152
A430078I02Rik	0.0144087	0.00961524	0.00388198	0.00031211	0.000626305	0	0.00814503
A430105I19Rik	0.00576366	0.00961524	0.0574219	0.016229	0.0189968	0.00465385	0.0110947
A430105J06Rik	0.00480306	0	0.010093	0.0102994	0.00177453	0.0058173	0.0176542
A430106G13Rik	0.00672425	0	0.00543476	0.00436952	0.00709806	0.0157062	0.0117111
A430110L20Rik	0.009606	0	0.00155279	0.00530584	0.00104384	0	0.0040065
A4galt	0.000960615	0.134212	0.120824	0.00031211	0.000208768	0	0.000836525
A530017D24Rik	0.0134482	0.0384521	0.0217374	0.00873896	0.0118995	0.0244304	0.0631817
A530076I17Rik	0	0	0.000776397	0.00374531	0.000626305	0.000581734	0.00074847
A530095I07Rik	0	0	0.000776397	0.000936329	0.000313152	0.00116347	0.00277374
A630001G21Rik	0.0767737	0	0.000776397	0	0	0.00116347	0.000484304
A630023P12Rik	0	0	0	0	0	0	0.00171708
A630072M18Rik	0.00672425	0.0384521	0.0450159	0.0287102	0.0118995	0.019196	0.0260174
A630089N07Rik	0.00576366	0	0.00543476	0.00936316	0.00354905	0.00698075	0.0158493
A730011C13Rik	0	0	0.00232919	0.00218477	0.00167015	0.000581734	0.00466691
A730015C16Rik	0.000960615	0	0.0131984	0.00031211	0.00104384	0	0.00356623
A730017C20Rik	0.129322	0.181691	0.119282	0.201505	0.134355	0.354921	0.610395
A730020M07Rik	0.00480306	0.0288422	0.00232919	0.02247	0.00177453	0.00290866	0.00250957
A730035I17Rik	0	0	0	0.00062422	0.000104384	0	0.00118875
A730043L09Rik	0.000960615	0	0.000776397	0.00031211	0.000208768	0	0.00162902
A730046J19Rik	0.00192123	0.00961524	0.000776397	0	0.000939457	0.00290866	0.0170819
A730049H05Rik	0	0.00961524	0	0	0.000208768	0.0017452	0.00316999
A730056A06Rik	0	0.0288422	0.00621114	0.0199737	0.00313152	0.00988931	0.00669215
A730060N03Rik	0.00192123	0	0.00310559	0.00062422	0.000730689	0	0.0205595
A730063M14Rik	0.0201715	0.0384521	0.0217374	0.0143566	0.0183706	0.0116344	0.0250491
A730071L15Rik	0.00192123	0	0.00388198	0.00187266	0.000521921	0.0017452	0.0102142
A730081D07Rik	0.000960615	0	0.00310559	0.00436952	0.0032359	0.00465385	0.0169498
A730098A19Rik	0.00480306	0	0.000776397	0.00593005	0.00584548	0.00639903	0.0316946
A830005F24Rik	0.00384245	0.00961524	0	0.00156055	0.00553233	0.00290866	0.00964191
A830008E24Rik	0.0508906	0.00961524	0	0.0115478	0.000313152	0	0.00105666
A830009L08Rik	0.000960615	0.00961524	0	0.00655426	0.00281837	0.0017452	0.00339012
A830010M20Rik	0.0345752	0.00961524	0.0364826	0.0474229	0.14273	0.0639471	0.157061
A830011K09Rik	0.000960615	0	0	0.00156055	0.00114822	0.00290866	0.0121513
A830018L16Rik	0.0105666	0.0288422	0.0225136	0.0115478	0.0101251	0.0116344	0.178377
A830019P07Rik	0.000960615	0.00961524	0.00310559	0.0177893	0.00281837	0.0017452	0.00294985
A830029E22Rik	0.000960615	0	0.00155279	0	0.000313152	0	0.00339012
A830031A19Rik	0	0	0	0.00031211	0.000313152	0	0.00233346
A830035O19Rik	0.000960615	0.00961524	0.00465837	0.00312109	0.00302713	0.00232693	0.00893749
A830036E02Rik	0	0	0	0	0.000104384	0	0.00259763
A830052D11Rik	0.0115271	0	0.010093	0.00530584	0.0346486	0.00232693	0.0165536
A830082K12Rik	0.0163297	0.0192296	0.0349308	0.0598893	0.00897692	0.0354783	0.0965785
A830092H15Rik	0.00384245	0.0384521	0.00310559	0.00249688	0.00281837	0.0110527	0.0702983
A930001A20Rik	0.000960615	0	0	0.00811477	0.00146138	0.000581734	0.00101264
A930002C04Rik	0.000960615	0	0	0	0.000104384	0.0017452	0.00224541
A930003A15Rik	0.00480306	0	0.00465837	0.00062422	0.0279713	0.0017452	0.00268568
A930003O13Rik	0.00288184	0.00961524	0.00388198	0.00312109	0.0019833	0.00872589	0.0151009
A930004D18Rik	0.00192123	0.00961524	0.00621114	0.00312109	0.00407097	0.00232693	0.0184906
A930006I01Rik	0.00576366	0	0.00310559	0.00187266	0.0630063	0.0017452	0.00352221
A930007I19Rik	0.0499312	0	0.00232919	0.00031211	0.000835073	0.00116347	0.00532732
A930009A15Rik	0.00384245	0	0.00155279	0.00967526	0.00354905	0.109149	0.00405053
A930012L18Rik	0.00288184	0.0192296	0.00310559	0.00530584	0.00240083	0.00290866	0.0146167
A930015D03Rik	0.00192123	0.00961524	0.00388198	0.00561795	0.00480165	0.00872589	0.0122834
A930016O22Rik	0.00192123	0	0.000776397	0.00062422	0.000417537	0.000581734	0.00700034
A930017K11Rik	0.00192123	0.0192296	0.000776397	0.00062422	0.0293277	0.00116347	0.00162902
A930024E05Rik	0.00576366	0.00961524	0.00388198	0.00624216	0.00292275	0.00523558	0.0108306
A930024N18Rik	0	0.00961524	0.00155279	0.00031211	0.00167015	0.0017452	0.0061198
A930028N01Rik	0	0	0.00931664	0.00405742	0.0272409	0.00116347	0.00334609
A930029G22Rik	0.0278542	0.0288422	0.0155273	0.00593005	0.0019833	0.0093076	0.0274258
A930033H14Rik	0.0220923	0	0.0326029	0.00062422	0.000521921	0.0017452	0.0236406
A930041C12Rik	0	0	0	0.00031211	0.000313152	0	0.0012768
AA387200	0	0	0.000776397	0.00031211	0.000104384	0	0.00220138
AA467197	0.00672425	0	0.000776397	0.00124844	0.00490604	0.00407212	0.00356623
AA543186	0.000960615	0	0.000776397	0.00124844	0.00187891	0	0.00308193
AA986860	0.00288184	0.00961524	0.00388198	0.0034332	0.0145089	0.00232693	0.00818905
Aaas	0.0105666	0.0288422	0.0155273	0.0115478	0.0133608	0.0174511	0.0285701
Aacs	0.0182507	0	0.0170799	0.022782	0.0544616	0.0378037	0.0810103
Aadat	0	0	0	0	0	0	0.00145291
Aaed1	0.0508906	0.11513	0.153128	0.0433697	0.0492494	0.0436162	0.0876787
Aagab	0.118836	0.0192296	0.0349308	0.0262142	0.0357961	0.0296641	0.0907046
Aak1	0.0786892	0.0768474	0.103078	0.117706	0.0767513	0.136285	0.392969
Aamdc	0.188129	0.284604	0.363087	0.290827	0.571955	0.267311	0.32235
Aamp	0.553443	0.768304	0.510186	0.4644	0.69515	0.476263	0.44143
Aanat	0	0	0	0	0.000104384	0	0.00228944
Aar2	0.0288145	0.0864308	0.0519952	0.035573	0.0610268	0.0494272	0.106346
Aard	0.0201715	0	0.0302749	0.0299581	0.0174313	0.0447785	0.1484
Aars	0.188129	0.143735	0.0853002	0.0875908	0.110941	0.119552	0.211599
Aars2	0.0201715	0.0288422	0.020185	0.0259022	0.0168051	0.0133795	0.0634453
Aarsd1	0.009606	0	0.0209612	0.0124841	0.0157614	0.0151245	0.0666086
Aasdh	0.00864542	0.00961524	0.0139747	0.0177893	0.0129433	0.010471	0.0319586
Aasdhppt	0.0691092	0.11513	0.0876208	0.0745253	0.107932	0.0964183	0.142432
Aass	0	0	0.00232919	0.0205978	0.00208768	0	0.00184916
Aatf	0.0844337	0.124677	0.0388101	0.0237181	0.0382996	0.047103	0.0656421
Aatk	0.0528093	0.124677	0.104623	0.108712	0.523559	0.163896	0.283384
AB041806	0.000960615	0	0.00155279	0.00062422	0.00104384	0.00349039	0.0305064
Abat	0.0633582	0.172224	0.0891675	0.310528	0.0900661	0.151255	0.373955
Abca1	0.20321	0.143735	0.0388101	0.200587	0.0309971	0.131673	0.0274698
Abca2	0.0777315	0.162742	0.11774	0.133808	0.898759	0.125326	0.320676
Abca3	0.0547277	0.0576604	0.0550963	0.0654962	0.0361091	0.083672	0.201599
Abca4	0	0.00961524	0.000776397	0.00218477	0.000417537	0	0.000968608
Abca5	0.009606	0.0768474	0.0380343	0.0262142	0.0252583	0.0709121	0.232222
Abca6	0.000960615	0	0.000776397	0.00124844	0.0149264	0.0319899	0.00286179
Abca7	0.0240131	0.00961524	0.0256183	0.0152928	0.0223363	0.0418726	0.0462566
Abca8a	0.0124877	0.804573	0.0364826	0.00187266	0.133631	0.00465385	0.00466691
Abca8b	0.00192123	0.0384521	0.00465837	0.00436952	0.012317	0.0180328	0.0403624
Abca9	0.11979	0.11513	0.00621114	0	0.000104384	0	0.00145291
Abcb10	0.0249734	0.0384521	0.0411375	0.0321418	0.090274	0.030827	0.115229
Abcb1a	0.000960615	0.0288422	0.556268	0	0.000730689	0	0.00290582
Abcb1b	0.0633582	0	0.00543476	0.00998735	0.00250522	0.0151245	0.0105664
Abcb4	0.031695	0	0.00388198	0.0106115	0.00167015	0.0476841	0.0100822
Abcb6	0.0163297	0.0384521	0.0170799	0.0159169	0.0118995	0.0226857	0.0518853
Abcb7	0.0297747	0.0192296	0.0403617	0.0249662	0.0279713	0.047103	0.139206
Abcb8	0.0345752	0.0192296	0.0419132	0.0717238	0.161716	0.106257	0.119733
Abcb9	0.0220923	0.0288422	0.0287228	0.122663	0.0264061	0.0139612	0.111336
Abcc1	0.0220923	0	0.0155273	0.0109236	0.0225451	0.0273381	0.05083
Abcc10	0.009606	0.00961524	0.014751	0.0237181	0.00960319	0.0093076	0.0662132
Abcc3	0.0633582	0	0	0	0.000521921	0.000581734	0.000880553
Abcc4	0.00384245	0	0.0822055	0.00405742	0.000417537	0.0058173	0.00427067
Abcc5	0.11979	0.0768474	0.102306	0.187722	0.139216	0.157004	0.29867
Abcc8	0.000960615	0	0.00310559	0.00280898	0.00167015	0.0017452	0.0354788
Abcc9	0	0	0.199756	0.00124844	0.000417537	0.00116347	0.0074406
Abcd1	0.0643168	0.00961524	0.0357067	0.022158	0.0226494	0.0244304	0.0370188
Abcd2	0.0719839	0.0192296	0.0108694	0.0748365	0.0051148	0.00756246	0.024609
Abcd3	0.086348	0.181691	0.0984434	0.198139	0.134769	0.266188	0.195209
Abcd4	0.0460932	0.0960063	0.0628468	0.113675	0.0571714	0.123594	0.104507
Abce1	0.0806043	0.067257	0.123906	0.0704785	0.0849708	0.083672	0.174996
Abcf1	0.221058	0.21939	0.290166	0.164057	0.341842	0.205645	0.220633
Abcf2	0.0940017	0.0576604	0.104623	0.074214	0.0832025	0.0888881	0.15432
Abcf3	0.074858	0.0960063	0.0744653	0.0723464	0.0912096	0.1051	0.166968
Abcg1	0.066234	0.0864308	0.0450159	0.022158	0.279037	0.232909	0.162016
Abcg2	0.0489718	0.0960063	0.656098	0.0230941	0.0105426	0.154705	0.0398785
Abcg4	0.0105666	0.00961524	0.0209612	0.0380682	0.00981195	0.0546557	0.170658
Abhd10	0.0441739	0.0960063	0.0953523	0.0872799	0.065923	0.117241	0.137112
Abhd11	0.102606	0.0960063	0.0860738	0.166828	0.114364	0.120707	0.225959
Abhd12	1.22137	0.339589	0.201278	0.362191	0.476632	0.732577	0.680428
Abhd13	0.0364953	0.0384521	0.0310509	0.0418105	0.0244235	0.0354783	0.0802204
Abhd14a	0.0796468	0.293831	0.113113	0.186802	0.266359	0.207353	0.224886
Abhd14b	0.0547277	0.143735	0.112341	0.225305	0.0487281	0.0273381	0.124409
Abhd15	0.0508906	0	0.000776397	0.00374531	0.00177453	0	0.00361026
Abhd16a	0.166378	0.284604	0.230107	0.18404	0.223296	0.268434	0.298122
Abhd17a	0.225743	0.21939	0.307996	0.156353	0.527126	0.171927	0.257098
Abhd17b	0.0643168	0.0384521	0.0729167	0.0913212	0.379937	0.137438	0.125196
Abhd17c	0.211672	0.0864308	0.0550963	0.055527	0.0804976	0.128212	0.0985504
Abhd18	0.021132	0.0192296	0.0364826	0.100952	0.0462257	0.0755535	0.196807
Abhd2	0.087305	0.0960063	0.663067	0.153578	0.0878827	1.13947	0.113348
Abhd3	0.056646	0.0768474	0.058972	0.53552	0.107932	0.220433	0.0593584
Abhd4	0.0806043	0.0384521	0.0806579	0.129785	0.206259	0.094681	0.0374148
Abhd5	0.0384151	0.0480584	0.0674953	0.0299581	0.227368	0.0348969	0.0226283
Abhd6	0.194732	0.0384521	0.0636217	0.125141	0.0829945	0.125326	0.107485
Abhd8	0.174899	0.357707	0.306513	0.30457	0.152539	0.296397	0.704004
Abi1	0.206973	0.162742	0.151593	0.173904	0.0839307	0.130519	0.196764
Abi2	0.0537685	0.181691	0.143913	0.118325	0.10897	0.258879	0.411686
Abi3	0.793148	0	0.0225136	0.00124844	0.00313152	0.00232693	0.0049751
Abi3bp	0.00288184	0.00961524	0.014751	0.0187255	0.0038622	0.00639903	0.196678
Abl1	0.103561	0.0960063	0.0899408	0.0252782	0.145209	0.0267566	0.0466524
Abl2	0.0326551	0.00961524	0.0333789	0.0299581	0.0232756	0.0296641	0.0871524
Ablim1	0.0432142	0.0288422	0.45888	0.146479	0.0245278	0.0354783	0.192616
Ablim2	0.0278542	0.0288422	0.0333789	0.0623815	0.0980682	0.0523321	0.237749
Ablim3	0.009606	0.00961524	0.0194087	0.0102994	0.00960319	0.0151245	0.127205
Abr	0.118836	0.153246	0.226324	0.38493	0.0525854	0.191955	0.402914
Abracl	0.234165	0.0768474	0.158497	0.0293341	0.0229625	0.0598828	0.112867
Abraxas1	0.00864542	0.00961524	0.0178562	0.0243422	0.0182662	0.0325713	0.045157
Abraxas2	0.0825192	0.067257	0.0736911	0.0798154	0.0707135	0.0906263	0.17751
Abt1	0.0604819	0.0864308	0.107711	0.0486699	0.069464	0.0639471	0.124453
Abtb1	0.130275	0.124677	0.0999886	0.0798154	0.100353	0.115508	0.169009
Abtb2	0.009606	0.0288422	0.0279467	0.035573	0.0513344	0.108571	0.0110507
AC061963.1	0.000960615	0	0.000776397	0.000936329	0.00104384	0.00116347	0.00906957
AC078895.1	0.00480306	0	0.00698752	0.00405742	0.00459289	0.00756246	0.0543474
AC101921.1	0.00192123	0	0.00155279	0.00187266	0.000730689	0.0360597	0.0275578
AC110166.2	0	0	0	0.00187266	0.000626305	0.0017452	0.00638397
AC110241.2	0	0	0	0.00031211	0.00334029	0	0
AC113587.1	0.000960615	0	0.00155279	0.00062422	0.000626305	0.00116347	0.00246555
AC114585.1	0	0	0	0.00249688	0.000626305	0.00116347	0.0190188
AC116487.2	0	0	0	0.000936329	0.00845501	0	0.00184916
AC118542.1	0.00576366	0.00961524	0.00931664	0.00374531	0.00438412	0.00639903	0.117853
AC122413.1	0.00672425	0	0.00698752	0.00624216	0.00699368	0.00639903	0.0293622
AC123724.1	0.00480306	0	0.00698752	0.00280898	0.00375782	0.00232693	0.00757268
AC123870.1	0	0.00961524	0	0.00156055	0.00657615	0.00116347	0.000132083
AC124532.2	0	0	0.00232919	0.00062422	0.000521921	0.0017452	0.00316999
AC124561.1	0	0	0.000776397	0	0	0.000581734	0.0141764
AC124739.2	0	0	0.000776397	0.00124844	0.000835073	0.000581734	0.00876139
AC125141.1	0.00192123	0	0	0.00405742	0.000521921	0.010471	0.00633994
AC125141.3	0	0	0	0	0.000313152	0	0.00193721
AC125371.2	0	0	0	0	0.000104384	0.00116347	0.00378637
AC126055.1	0	0	0	0.00062422	0.00208768	0.00116347	0.00074847
AC127341.3	0.0422545	0	0.014751	0.00187266	0.000939457	0.0017452	0.0163776
AC127341.5	0.00192123	0	0	0.00156055	0.000626305	0.0017452	0.00290582
AC129328.1	0.000960615	0.00961524	0.00310559	0.00655426	0.00427974	0.00407212	0.00884944
AC130815.2	0.00672425	0.153246	0.0194087	0.00062422	0.0181618	0	0.00149694
AC133505.1	0.00576366	0	0.00621114	0.00717847	0.0530023	0.0162878	0.00264166
AC139671.1	0.00864542	0	0.010093	0	0	0	0.000440276
AC140186.1	0.000960615	0	0	0.00156055	0.00292275	0.000581734	0.00277374
AC140300.1	0	0.00961524	0	0.00062422	0.000417537	0.00232693	0.00330207
AC144408.3	0.00192123	0	0	0.00062422	0.000417537	0.000581734	0.00180513
AC146911.1	0.0767737	0.00961524	0.024066	0.0177893	0.027867	0.0441974	0.0448491
AC149090.1	0.422478	0.275353	0.248973	0.353103	0.160892	0.438939	0.806388
AC150035.3	0.00288184	0	0.00155279	0	0.000104384	0	0.0012768
AC151836.1	0.000960615	0	0.014751	0	0.000417537	0	0.000176111
AC152827.1	0.00384245	0.00961524	0.00854027	0.00967526	0.00887254	0.0058173	0.0190628
AC153140.2	0.000960615	0	0.00155279	0.00062422	0.000626305	0.00232693	0.00369831
AC154200.1	0	0	0	0.00031211	0.000313152	0	0.00105666
AC154509.1	0	0	0	0	0	0.00116347	0.00220138
AC154683.1	0.000960615	0	0.0108694	0.0140445	0.000730689	0	0.00220138
AC154760.1	0.00480306	0.0192296	0.00155279	0.00624216	0.00281837	0.0058173	0.0242569
AC156026.1	0	0	0	0	0.000313152	0	0.00510719
AC158554.1	0.00192123	0	0.00155279	0.00156055	0.000626305	0	0.00352221
AC159282.1	0	0	0.000776397	0	0	0	0.00180513
AC160336.1	0.107382	0.256784	0.139301	0.0969144	0.0986915	0.107414	0.339207
AC160562.1	0.0364953	0	0	0	0.000104384	0	0.000264166
AC161165.3	0	0	0.00155279	0.00156055	0.00313152	0.0017452	0.00942178
AC161165.6	0.00672425	0	0.00465837	0.00530584	0.00605424	0.00465385	0.0216599
AC161199.1	0.000960615	0	0	0	0	0	0.00132083
AC161376.2	0.00384245	0.0288422	0.00543476	0.00124844	0.0950551	0.0017452	0.00268568
AC162302.1	0.00288184	0.0192296	0.0108694	0.00593005	0.00949881	0.00290866	0.00391845
AC163032.1	0.00768484	0.00961524	0.00931664	0.0115478	0.0167007	0.0127978	0.0449371
AC163040.1	0.00192123	0	0.00465837	0.00062422	0.00177453	0.000581734	0.00572356
AC163633.1	0.00384245	0	0.000776397	0.0034332	0.00281837	0.0017452	0.0315186
AC163720.3	0.000960615	0	0.00155279	0.00031211	0.000939457	0	0.00299388
AC164424.1	0	0.00961524	0.00543476	0.000936329	0.000835073	0.00407212	0.0171259
AC165271.1	0	0	0	0.00156055	0.000104384	0	0.00114472
AC165953.2	0.0201715	0.0288422	0.024066	0.0315179	0.0204579	0.0325713	0.113392
AC168977.1	0.00192123	0	0.000776397	0	0	0.000581734	0.00933373
AC174678.1	0.00288184	0	0.00155279	0.00436952	0.00219206	0.00290866	0.0049751
Acaa1a	0.357378	0.348662	0.30503	0.319446	0.455768	0.359294	0.225444
Acaa1b	0.00192123	0	0.00232919	0.000936329	0.00125261	0.00232693	0.00884944
Acaa2	0.0671925	0.181691	0.126217	0.113055	0.0189968	0.0139612	0.0324867
Acaca	0.0201715	0.143735	0.0535458	0.0981569	0.262225	0.0755535	0.179677
Acacb	0.00480306	0	0.0395859	0.0137324	0.00302713	0.00232693	0.0309025
Acad10	0.00576366	0	0.00621114	0.00561795	0.00334029	0.0017452	0.00924568
Acad11	0.00864542	0.00961524	0.0263945	0.0312059	0.0273452	0.0168695	0.0320026
Acad12	0.021132	0.0384521	0.0225136	0.022782	0.0158657	0.00639903	0.0156292
Acad8	0.0470528	0.0480584	0.0705935	0.0726577	0.0775839	0.062786	0.073504
Acad9	0.0288145	0.00961524	0.0341549	0.0346373	0.042263	0.0453597	0.0825461
Acadl	0.0547277	0.105573	0.118511	0.0993993	0.107621	0.0517512	0.0238607
Acadm	0.171114	0.275353	0.238418	0.155737	0.0967176	0.104522	0.112386
Acads	0.261189	0.0864308	0.078336	0.0573967	0.0279713	0.0587213	0.0365788
Acadsb	0.0499312	0.181691	0.0961252	0.0910104	0.0585261	0.11493	0.197498
Acadvl	0.130275	0.172224	0.142376	0.144626	0.132183	0.104522	0.140644
Acan	0.00192123	0	0.00310559	0.00405742	0.000835073	0.0726528	0.00391845
Acap2	0.129322	0.11513	0.0945794	0.111814	0.255156	0.0825125	0.0673993
Acap3	0.026894	0.0288422	0.046567	0.0343253	0.0376738	0.18624	0.0906608
Acat1	0.173007	0.191142	0.250478	0.222565	0.22747	0.259442	0.249207
Acat2	0.058564	0.0192296	0.0760137	0.108712	0.16563	0.140319	0.198751
Acat3	0.00192123	0	0.000776397	0.0106115	0.00271398	0.0017452	0.00272971
Acbd3	0.148351	0.21939	0.142376	0.0785708	0.107725	0.102207	0.158191
Acbd4	0.0345752	0.105573	0.123136	0.0695444	0.0306841	0.0656886	0.137374
Acbd5	0.100694	0.105573	0.136993	0.136591	0.190905	0.175938	0.212245
Acbd6	0.221995	0.256784	0.239927	0.167136	0.237733	0.214182	0.255734
Acbd7	0.000960615	0	0.00388198	0.00405742	0.00532357	0.00523558	0.0268536
Accs	0.0307348	0.0288422	0.0131984	0.0209098	0.00626301	0.0186144	0.0256653
Acd	0.0901755	0.0768474	0.0930334	0.0776373	0.0888185	0.0883087	0.17556
Ace	0.00288184	0.00961524	0.0341549	0.00280898	0.00187891	0.0116344	0.0732405
Ace2	0.000960615	0	0.0512198	0	0.00167015	0.000581734	0.000264166
Acer2	0.0182507	0.0192296	0.106939	0.00749057	0.0189968	0.00756246	0.0463445
Acer3	0.130275	0.0192296	0.0287228	0.0711011	0.018788	0.0505892	0.102055
Ache	0.072942	0.067257	0.0860738	0.0763926	0.0456001	0.210769	0.666208
Acin1	0.361886	0.303033	0.384118	0.356625	0.337798	0.352186	0.383888
Ackr1	0.0124877	0.0288422	0.0271706	0.0159169	0.0122126	0.0319899	0.221321
Ackr3	0.00288184	0.00961524	0.389891	0.0315179	0.0019833	0.073233	0.0066041
Acly	0.177737	0.11513	0.187563	0.142464	0.189777	0.141471	0.309649
Aco1	0.031695	0.0288422	0.0364826	0.0343253	0.0267192	0.0331527	0.0340708
Aco2	0.222933	0.209992	0.347762	0.528978	0.338686	0.394569	0.494502
Acot1	0.00672425	0.0192296	0.024066	0.042746	0.19695	0.073233	0.0210877
Acot11	0.0144087	0.00961524	0.014751	0.139683	0.0127345	0.00698075	0.0256653
Acot13	0.297237	0.312211	0.305772	0.42841	0.354432	0.364749	0.448031
Acot2	0.0326551	0.0768474	0.0752396	0.0611354	0.113535	0.099892	0.0365348
Acot3	0.00288184	0	0.00232919	0.00156055	0.000521921	0.000581734	0.00867334
Acot4	0	0	0	0.000936329	0.000626305	0.000581734	0.00669215
Acot6	0.00192123	0.00961524	0.0077639	0.016229	0.019936	0.0133795	0.0159373
Acot7	0.299076	0.455263	0.338968	0.438098	1.10322	0.589959	0.649414
Acot8	0.0528093	0.0384521	0.0434646	0.0679876	0.09017	0.0703318	0.103018
Acot9	0.0374552	0.0192296	0.0752396	0.0143566	0.0296408	0.0244304	0.0624786
Acox1	0.0623995	0.143735	0.099216	0.136282	0.101807	0.131096	0.24737
Acox3	0.298156	0.172224	0.0519952	0.0343253	0.0319361	0.0203593	0.0838624
Acp1	0.31192	0.375713	0.460983	0.781335	0.505261	1.31801	1.0892
Acp2	0.155947	0.067257	0.0651712	0.0931859	0.0445573	0.117241	0.192098
Acp5	0.000960615	0	0.00155279	0	0.000104384	0.000581734	0.00123277
Acp6	0.0719839	0.0480584	0.024066	0.0449287	0.0293277	0.0581406	0.0622589
Acp7	0	0	0.000776397	0.00031211	0.000104384	0	0.00272971
Acr	0.000960615	0	0	0.00062422	0.000104384	0	0.00700034
Acrbp	0.0230527	0.0288422	0.024066	0.042746	0.0200404	0.0348969	0.0935543
Acsbg1	0.0671925	0.11513	0.0643965	0.933786	0.0746696	0.12244	0.0561937
Acsf2	0.0249734	0.134212	0.0194087	0.0686103	0.0306841	0.00407212	0.00669215
Acsf3	0.0172902	0.0480584	0.0163036	0.0177893	0.0130476	0.0186144	0.0512258
Acsl1	0.109292	0.143735	0.158497	0.0102994	0.160273	0.0401288	0.154755
Acsl3	0.131227	0.238128	0.174578	1.3125	0.252122	0.387009	0.396968
Acsl4	0.0719839	0.0288422	0.0457914	0.030582	0.0250496	0.0412913	0.242541
Acsl5	0.11979	0.0192296	0.0558715	0.0137324	0.00741121	0.0598828	0.107441
Acsl6	0.0537685	0.143735	0.0760137	0.866063	0.0566503	0.124749	0.196635
Acsm5	0	0	0.000776397	0.0112357	0.000939457	0	0.000660415
Acss1	0.059523	0.00961524	0.0271706	0.107471	0.0128389	0.0738131	0.0111828
Acss2	0.0220923	0.0768474	0.0434646	0.129476	0.107932	0.0389663	0.0817124
Acss3	0.00192123	0.0288422	0.00232919	0.0318298	0.00146138	0.00232693	0.00290582
Acta1	0.00864542	0.00961524	0.00854027	0.0124841	0.00939443	0.0151245	0.0889506
Acta2	0.0777315	0.0480584	3.3247	0.0190376	0.0144045	0.0279196	0.0270737
Actb	3.84283	2.85668	3.69179	2.65806	3.51037	3.3561	2.75019
Actg1	1.88009	1.57334	1.95522	1.37723	1.31204	1.9815	1.51372
Actl6a	0.0997385	0.0384521	0.120824	0.0773262	0.102846	0.109149	0.109192
Actl6b	0.0384151	0.067257	0.046567	0.0552154	0.0402814	0.0894676	0.302165
Actn1	0.0528093	0.153246	0.716583	0.0205978	0.0241104	0.0319899	0.151143
Actn2	0.00192123	0.00961524	0.000776397	0.00062422	0.000730689	0.00232693	0.0105664
Actn3	0	0	0.00155279	0.000936329	0.000208768	0.000581734	0.004799
Actn4	0.0882619	0.21939	0.869244	0.104367	0.207179	0.116086	0.115229
Actr10	0.117882	0.200575	0.181456	0.177285	0.177151	0.238003	0.356922
Actr1a	0.127417	0.0864308	0.16003	0.133498	0.341743	0.195381	0.25616
Actr1b	0.129322	0.172224	0.198995	0.167136	0.145106	0.216456	0.489682
Actr2	0.479923	0.366725	0.361631	0.200893	0.207792	0.260004	0.621551
Actr3	0.504714	0.200575	0.417144	0.148332	0.243211	0.274604	0.402181
Actr3b	0.031695	0.0288422	0.0543211	0.0810598	0.0307885	0.0622054	0.172958
Actr5	0.026894	0.0864308	0.0364826	0.0237181	0.0271365	0.0238488	0.0510499
Actr6	0.0403349	0.067257	0.0550963	0.0595777	0.0747737	0.0668496	0.126943
Actr8	0.100694	0.134212	0.121595	0.0745253	0.10295	0.0772936	0.164189
Actrt3	0.00384245	0	0.000776397	0.00124844	0.00135699	0.00232693	0.0184465
Acvr1	0.0451336	0.0288422	0.0442402	0.0480464	0.0175356	0.0441974	0.0655103
Acvr1b	0.0220923	0.0192296	0.0178562	0.0240301	0.0108557	0.0314084	0.160321
Acvr1c	0.00480306	0.00961524	0.00543476	0.0686103	0.00229645	0.00232693	0.0348188
Acvr2a	0.00672425	0.0192296	0.0279467	0.0102994	0.00720244	0.0209409	0.0843011
Acvr2b	0.056646	0.067257	0.0883942	0.0383801	0.0682143	0.0813529	0.184181
Acvrl1	0.066234	0	0.449746	0.00062422	0.000730689	0.00349039	0.00171708
Acy1	0.056646	0.0192296	0.0178562	0.0617585	0.108659	0.0221041	0.0242128
Acy3	0.000960615	0.0288422	0.0434646	0.00249688	0.0950551	0.00290866	0.00396248
Acyp1	0.111202	0.153246	0.11774	0.146479	0.177973	0.12244	0.18747
Acyp2	0.0920888	0.303033	0.170753	0.252006	0.317896	0.236871	0.294285
Ada	0.00864542	0.0192296	0.00698752	0.00124844	0.0177444	0	0.00149694
Adal	0.0134482	0.00961524	0.0116457	0.0230941	0.019936	0.0325713	0.0732844
Adam10	0.21449	0.0960063	0.156196	0.102505	0.197974	0.185096	0.190758
Adam11	0.021132	0.0768474	0.0256183	0.0496051	0.0273452	0.0975763	0.211642
Adam12	0.000960615	0	0.00155279	0.00249688	0.00114822	0.0314084	0.00550343
Adam15	0.330183	0.0768474	0.316875	0.0813708	0.0981721	0.0952602	0.218785
Adam17	0.103561	0.0384521	0.0674953	0.0365087	0.0450787	0.0482651	0.0240808
Adam19	0.00672425	0.0192296	0.012422	0.00530584	0.0768554	0.0133795	0.0389106
Adam1a	0	0	0.000776397	0.000936329	0.00219206	0.000581734	0.00642799
Adam21	0	0	0	0.000936329	0.000417537	0.000581734	0.00272971
Adam22	0.0201715	0.0480584	0.0473426	0.0343253	0.065923	0.130519	0.385977
Adam23	0.0182507	0	0.0256183	0.022158	0.03444	0.12244	0.293357
Adam28	0	0	0.000776397	0.00062422	0.000417537	0	0.00154097
Adam32	0.000960615	0	0	0.00031211	0.00135699	0.00232693	0.00316999
Adam33	0.0182507	0.00961524	0.0131984	0.0034332	0.00187891	0.000581734	0.0267216
Adam4	0.00288184	0	0.00155279	0.000936329	0.00104384	0	0.00356623
Adam8	0.00576366	0	0.00621114	0.00312109	0.00156576	0.0058173	0.0217479
Adam9	0.0604819	0.0768474	0.0550963	0.0174773	0.101288	0.24083	0.0724501
Adamts1	0.566682	0.143735	0.706756	0.0127962	0.0291191	0.131673	0.01334
Adamts10	0.0115271	0.143735	0.0744653	0.038692	0.00657615	0.0436162	0.0702983
Adamts12	0	0.0960063	0.00155279	0.00499374	0.000313152	0	0.00369831
Adamts15	0.000960615	0.0192296	0.0341549	0.00218477	0.00125261	0.00290866	0.0245209
Adamts16	0.009606	0	0.00465837	0.00187266	0.000626305	0.000581734	0.011579
Adamts17	0	0	0.00310559	0.00062422	0.000208768	0.0017452	0.0117111
Adamts18	0.000960615	0	0.00232919	0.000936329	0.000521921	0.000581734	0.0342028
Adamts19	0	0	0.00155279	0	0.000104384	0	0.00607578
Adamts2	0.00864542	0.124677	0.024066	0.0124841	0.0269279	0.0151245	0.202074
Adamts20	0.00192123	0.00961524	0.00465837	0.0318298	0.0197273	0.00290866	0.0145286
Adamts3	0	0	0	0	0.000104384	0.0058173	0.00330207
Adamts4	0.0115271	0.0384521	0.024066	0.00405742	0.192033	0.0162878	0.00620786
Adamts5	0.00384245	0.0768474	0.0372585	0.0146686	0.00250522	0.0180328	0.0410223
Adamts6	0.00672425	0.0192296	0.00388198	0.00499374	0.00313152	0.00872589	0.0082771
Adamts8	0	0	0.0318269	0.00031211	0.000313152	0.00116347	0.00814503
Adamts9	0.000960615	0.0192296	0.00854027	0.0262142	0.00187891	0.0110527	0.0072645
Adamtsl1	0.00384245	0.0192296	0.0976707	0.00187266	0.107725	0.00698075	0.0464765
Adamtsl2	0.00576366	0.00961524	0.0217374	0.00998735	0.00334029	0.00349039	0.0268976
Adamtsl3	0	0.00961524	0	0.00031211	0.000626305	0.0122161	0.00237749
Adamtsl4	0.00480306	0.00961524	0.0357067	0.00249688	0.130009	0.00407212	0.00656007
Adamtsl5	0.00768484	0.0192296	0.0651712	0.00780267	0.000939457	0.00290866	0.00471094
Adap1	0.059523	0.134212	0.0535458	0.0449287	0.40164	0.0563983	0.208498
Adap2	0.541787	0.153246	0.358717	0.00249688	0.00167015	0.00116347	0.00189319
Adap2os	0.472172	0.0960063	0.299092	0.00124844	0.00177453	0.00349039	0.001585
Adar	0.0623995	0.067257	0.083753	0.0767038	0.0458086	0.091785	0.34814
Adarb1	0.0288145	0.0192296	0.0543211	0.0290221	0.0168051	0.0372224	0.212245
Adarb2	0.00384245	0	0.014751	0.00936316	0.0068893	0.193668	0.127991
Adat1	0.0134482	0.00961524	0.0178562	0.0181014	0.0135695	0.0133795	0.0625225
Adat2	0.00768484	0.00961524	0.00698752	0.00436952	0.0178487	0.00523558	0.0140884
Adck1	0.0480123	0.0192296	0.0341549	0.0570851	0.0362134	0.0598828	0.085354
Adck2	0.0432142	0.0480584	0.0574219	0.0496051	0.0485196	0.0883087	0.110855
Adck5	0.0451336	0.00961524	0.0349308	0.0280862	0.0136739	0.0645276	0.0988133
Adcy1	0.00288184	0.0480584	0.0163036	0.0134203	0.00584548	0.0296641	0.13877
Adcy10	0	0	0.00465837	0.00655426	0.015657	0.0279196	0.015365
Adcy2	0.0201715	0.0288422	0.0310509	0.0714124	0.0172225	0.0447785	0.353735
Adcy3	0.0278542	0.0288422	0.0287228	0.03027	0.0134651	0.0813529	0.181497
Adcy4	0.000960615	0	0.0860738	0.00031211	0.000208768	0	0.000396249
Adcy5	0.0182507	0.181691	0.177636	0.0187255	0.124314	0.0517512	0.15519
Adcy6	0.0115271	0.00961524	0.119282	0.0190376	0.00897692	0.0203593	0.0731088
Adcy7	0.0719839	0.0192296	0.00465837	0.00280898	0.00240083	0.00290866	0.106959
Adcy8	0.009606	0.0192296	0.0131984	0.0795042	0.00553233	0.0517512	0.102887
Adcy9	0.0153692	0.0288422	0.105395	0.0196617	0.0109601	0.0168695	0.0748212
Adcyap1	0.0288145	0.0960063	0.049669	0.0414987	0.0306841	0.0505892	0.691641
Adcyap1r1	0.0403349	0.0576604	0.0651712	0.440656	0.0339183	0.316393	0.263356
Add1	0.17206	0.256784	0.242191	0.215555	0.435383	0.235174	0.388064
Add2	0.0460932	0.0480584	0.0372585	0.0489817	0.0372565	0.0935227	0.374202
Add3	0.087305	0.247466	0.143913	0.191095	0.219119	0.0610441	0.0833798
Adgb	0.00192123	0	0	0.000936329	0	0.00116347	0.00347818
Adgra1	0.0240131	0.0384521	0.0357067	0.353397	0.0420544	0.171353	0.320551
Adgra2	0.000960615	0.0768474	0.133147	0.00062422	0.000730689	0.00232693	0.00493108
Adgra3	0.0153692	0.00961524	0.0372585	0.0340134	0.00761997	0.038385	0.0406703
Adgrb1	0.0345752	0.11513	0.0543211	0.38435	0.0592555	0.228376	0.361221
Adgrb2	0.0220923	0.0576604	0.0419132	0.185575	0.0339183	0.150105	0.287106
Adgrb3	0.0288145	0.0576604	0.0457914	0.288431	0.0365263	0.205075	0.368275
Adgrd1	0	0	0	0.00031211	0.000104384	0	0.00110069
Adgre1	0.456592	0	0.00310559	0.0034332	0.00240083	0.00407212	0.0043147
Adgre5	0.009606	0.162742	0.146986	0.0243422	0.0032359	0.00639903	0.00519524
Adgrf4	0.000960615	0	0	0.00124844	0.00114822	0	0.0020693
Adgrf5	0.00192123	0.105573	0.38195	0	0.000730689	0.0017452	0.00246555
Adgrg1	0.473035	0.0576604	0.126988	0.438098	0.0311015	0.216456	0.160495
Adgrg2	0.00288184	0.00961524	0.00465837	0.00312109	0.00929005	0.00407212	0.052369
Adgrg3	0	0	0.00232919	0.000936329	0.000208768	0.000581734	0.000924581
Adgrg6	0	0.0192296	0.00310559	0.00062422	0.0224407	0	0.00162902
Adgrl1	0.0614407	0.21939	0.225567	0.276429	0.0401771	0.230076	0.730039
Adgrl2	0.0240131	0.00961524	0.101534	0.00842687	0.00584548	0.0110527	0.207033
Adgrl3	0.0528093	0.0576604	0.0922604	0.349872	0.0453915	0.41979	0.545476
Adgrl4	0.00192123	0	0.330886	0	0.000835073	0.00116347	0.00180513
Adgrv1	0.00288184	0.0384521	0.0077639	0.00280898	0.122346	0.00814418	0.00774879
Adh5	0.175845	0.200575	0.159264	0.135045	0.241082	0.135132	0.085003
Adhfe1	0.009606	0	0.00931664	0.0795042	0.0159701	0.0127978	0.00757268
Adi1	0.0739001	0.0960063	0.0566467	0.0496051	0.308347	0.0575598	0.0774991
Adipor1	0.426878	0.209992	0.408569	0.121114	0.5242	0.167339	0.212245
Adipor2	0.0614407	0.0384521	0.197472	0.0605124	0.478316	0.0645276	0.0931159
Adk	0.0892188	0.26608	0.176107	0.517754	0.276324	0.189098	0.12052
Adm	0.00768484	0.143735	0.0426889	0.0283982	0.00156576	0.0500082	0.00391845
Adnp	0.009606	0	0.00854027	0.0034332	0.00939443	0.0116344	0.0295823
Adnp2	0.0230527	0.00961524	0.0302749	0.0181014	0.0124214	0.0232672	0.0469163
Ado	0.113111	0.11513	0.168457	0.0714124	0.856279	0.219297	0.078772
Adora1	0.0403349	0.0384521	0.0481181	0.205174	0.257076	0.282443	0.148052
Adora2a	0.00288184	0.162742	0.101534	0.00062422	0.000417537	0.000581734	0.0020693
Adora2b	0.0144087	0.143735	0.0271706	0.20334	0.00918568	0.12648	0.0127677
Adora3	0.176791	0	0.00232919	0	0.000417537	0	0.000440276
Adpgk	0.0489718	0.0576604	0.0225136	0.0330776	0.034127	0.0389663	0.0968853
Adprh	0.321978	0.191142	0.192901	0.255936	0.201862	0.396186	0.349052
Adprhl1	0.000960615	0	0	0.00062422	0.00167015	0	0.000924581
Adprhl2	0.0777315	0.0864308	0.0945794	0.0962931	0.103365	0.146077	0.144654
Adprm	0.0480123	0.00961524	0.0597471	0.0461758	0.0401771	0.0569791	0.0955706
Adra1a	0.000960615	0	0.00465837	0.0184134	0.000939457	0.0273381	0.0277779
Adra1b	0.00576366	0.0384521	0.0170799	0.0377563	0.0277626	0.0569791	0.115186
Adra2a	0.00576366	0.0288422	0.0178562	0.104057	0.00761997	0.00639903	0.0800448
Adra2c	0.00768484	0.0192296	0.0108694	0.00686636	0.00459289	0.0145428	0.05593
Adrb1	0.138843	0.0192296	0.00465837	0.0411869	0.00302713	0.0093076	0.0368428
Adrb2	0.498756	0	0.0667207	0.00280898	0.00146138	0.00290866	0.00796892
Adrb3	0.00384245	0.00961524	0	0.00062422	0.00104384	0.0017452	0.0191509
Adrm1	0.266758	0.153246	0.263253	0.148023	0.249694	0.163896	0.210867
Adsl	0.066234	0.0576604	0.0883942	0.0380682	0.0497707	0.0482651	0.10801
Adss	0.100694	0.162742	0.139301	0.10654	0.0928727	0.0993131	0.265866
Adssl1	0.0911322	0.0576604	0.0814317	0.0271502	0.64074	0.0348969	0.0913623
Aebp1	0.00288184	0.11513	0.0263945	0.00593005	0.0731081	0.0912057	0.00629591
Aebp2	0.056646	0.11513	0.118511	0.0433697	0.0859068	0.0604634	0.143913
Aen	0.0480123	0.0480584	0.0767879	0.0763926	0.0553996	0.0593021	0.110067
Aes	0.728312	1.02334	1.0097	0.864278	1.30013	1.00295	1.25546
AF529169	0.00864542	0.00961524	0.0131984	0.00624216	0.0051148	0.0151245	0.0933351
Afap1	0.0240131	0.247466	0.151593	0.0552154	0.0836186	0.0761335	0.0677947
Afap1l1	0.0489718	0.0192296	0.21116	0.00468163	0.0722753	0.0116344	0.0149248
Afap1l2	0.00768484	0.0192296	0.120824	0.0312059	0.00407097	0.131096	0.00713242
Afdn	0.0336152	0.209992	0.251231	0.0978463	0.140973	0.111462	0.299681
Aff1	0.0489718	0.0192296	0.0597471	0.021846	0.0150307	0.00639903	0.00959788
Aff2	0.00384245	0.0192296	0.010093	0.00811477	0.00647177	0.0197777	0.0636211
Aff3	0.0172902	0.0480584	0.0163036	0.0137324	0.0243191	0.0215225	0.112605
Aff4	0.109292	0.200575	0.198233	0.139064	0.159243	0.183952	0.392805
Afg1l	0.0115271	0	0.0232898	0.0165411	0.0146133	0.0186144	0.0556223
Afg3l1	0.0892188	0.0576604	0.0876208	0.091632	0.141903	0.163896	0.170311
Afg3l2	0.0528093	0.0192296	0.0574219	0.0464876	0.0386125	0.0685908	0.185913
Afmid	0.00576366	0	0.000776397	0.00124844	0.000417537	0.000581734	0.00964191
Afp	0.0192111	0	0	0	0.000104384	0	0.000924581
Aftph	0.144549	0.162742	0.118511	0.0496051	0.073941	0.0685908	0.174779
Aga	0.112157	0.105573	0.0426889	0.0745253	0.0813299	0.0389663	0.0304184
Agap1	0.05185	0.0960063	0.133916	0.0838592	0.349422	0.244785	0.292893
Agap2	0.00480306	0	0.00465837	0.00312109	0.00240083	0.0116344	0.0311665
Agap3	0.0796468	0.0480584	0.130068	0.104367	0.116438	0.136285	0.383151
Agbl2	0.000960615	0	0	0.0034332	0.000939457	0.0017452	0.00440275
Agbl3	0.0153692	0.0192296	0.0139747	0.0330776	0.0309971	0.0244304	0.0399225
Agbl4	0.00384245	0	0.00388198	0.0034332	0.00281837	0.00523558	0.0395705
Agbl5	0.00384245	0	0.0131984	0.00624216	0.00521918	0.0180328	0.0371068
Ager	0.00288184	0.00961524	0.0170799	0.00218477	0.000521921	0	0.00220138
Agfg1	0.0652754	0.0768474	0.156196	0.0542805	0.101288	0.141471	0.189503
Agfg2	0.057605	0.0960063	0.0504444	0.0841702	0.058005	0.0668496	0.159017
Aggf1	0.130275	0.0960063	0.122365	0.0844812	0.160789	0.0964183	0.166013
Agk	0.0384151	0.0192296	0.0574219	0.0411869	0.0427844	0.0738131	0.191579
Agl	0.0508906	0.0768474	0.078336	0.218604	0.0502919	0.101628	0.162277
Agmat	0.00288184	0.00961524	0.00232919	0.00312109	0.00208768	0.00290866	0.0214398
Agmo	0.13694	0.0384521	0.0248422	0.0383801	0.053732	0.0174511	0.00396248
Ago1	0.0508906	0.0384521	0.049669	0.0405632	0.0664438	0.0447785	0.127117
Ago2	0.0806043	0.0960063	0.144681	0.0947396	0.0448701	0.11204	0.250914
Ago3	0.05185	0.0960063	0.0543211	0.0773262	0.120273	0.107414	0.153058
Ago4	0.026894	0.0288422	0.0186325	0.0171652	0.0127345	0.0558174	0.0789037
Agpat1	0.039375	0.0576604	0.0481181	0.0511637	0.0522726	0.0685908	0.165318
Agpat2	0.100694	0.0384521	0.0512198	0.00624216	0.00219206	0.010471	0.0208236
Agpat3	0.142647	0.21939	0.167691	0.23473	0.279037	0.173646	0.244337
Agpat4	0.0700675	0.489796	0.153128	0.0701671	1.15641	0.421391	0.288121
Agpat5	0.108337	0.143735	0.121595	0.716453	0.168924	0.574105	0.183142
Agps	0.0719839	0	0.0333789	0.0268382	0.0797692	0.0412913	0.0815808
Agrn	0.0240131	0.0864308	0.231619	0.0835482	0.0315188	0.151255	0.159539
Agrp	0	0.00961524	0.000776397	0.00124844	0.000313152	0.00116347	0.00713242
Agt	0.165431	0.303033	0.146218	1.85148	0.131562	0.0656886	0.080747
Agtpbp1	0.0489718	0.0768474	0.10385	0.0667419	0.111253	0.0987342	0.246858
Agtr1a	0	0	0.000776397	0.00031211	0.000313152	0.000581734	0.00814503
Agtr2	0	0	0.00155279	0.00124844	0.000521921	0	0.0174341
Agtrap	0.0336152	0.124677	0.0667207	0.0480464	0.00855939	0.00814418	0.0478838
Ahctf1	0.0278542	0.0768474	0.0953523	0.0405632	0.0520642	0.0505892	0.123492
Ahcy	0.00672425	0.00961524	0.00854027	0.00249688	0.0146133	0.010471	0.0332348
Ahcyl1	0.0949581	0.172224	0.236153	0.593713	0.162231	0.141471	0.239803
Ahcyl2	0.0786892	0.0960063	0.0938065	0.262578	0.098276	0.11493	0.275165
Ahdc1	0.0547277	0.172224	0.123136	0.100331	0.0294321	0.0697515	0.178377
Ahi1	0.925502	1.49818	1.22622	1.52814	1.04616	1.70516	2.44449
Ahnak	0.039375	0.303033	0.771356	0.00530584	0.00156576	0.0017452	0.00435872
Ahnak2	0.039375	0.0960063	0.0357067	0.0414987	0.0411158	0.0488462	0.0644559
Ahr	0.00576366	0.00961524	0.0116457	0.00156055	0.00146138	0.00290866	0.0445852
Ahsa1	0.345623	0.293831	0.336766	0.283935	0.51328	0.361477	0.365348
Ahsa2	0.0987826	0.0576604	0.099216	0.0661191	0.143143	0.0952602	0.150534
AI115009	0	0	0.000776397	0.00031211	0.000208768	0.000581734	0.0030379
AI182371	0.000960615	0	0.000776397	0.00249688	0.0019833	0.000581734	0.000616387
AI197445	0.000960615	0	0.000776397	0.00031211	0.00281837	0.0017452	0.00149694
AI314180	0.066234	0.067257	0.071368	0.0863471	0.0522726	0.117241	0.219688
AI413582	0.4048	0.303033	0.262503	0.474782	0.628038	0.334616	0.702324
AI429214	0.000960615	0.0192296	0.00155279	0.00156055	0.00156576	0.000581734	0.00321401
AI464131	0.0153692	0.0480584	0.00931664	0.275827	0.0174313	0.0221041	0.0150129
AI467606	0.057605	0	0.0938065	0.00124844	0.00135699	0.00116347	0.0346428
AI480526	0.0249734	0.0192296	0.0395859	0.0959824	0.0320404	0.0302455	0.124234
AI504432	0.0249734	0.0192296	0.024066	0.0171652	0.0212928	0.0412913	0.320049
AI593442	0.05185	0.143735	0.105395	0.0925644	0.0464343	0.171927	0.962426
AI597479	0.0307348	0.0384521	0.0419132	0.0259022	0.0488324	0.030827	0.109848
AI606181	0.00384245	0	0.00931664	0.00530584	0.00709806	0.00872589	0.0166417
AI661453	0.000960615	0	0.010093	0	0.000208768	0	0.00105666
AI837181	0.121697	0.0864308	0.139301	0.0661191	0.102327	0.109149	0.187341
AI839979	0.00192123	0	0.000776397	0.00187266	0.000417537	0.000581734	0.00567954
AI847159	0	0	0	0	0.000104384	0.000581734	0.00132083
AI849053	0.00576366	0	0.00155279	0.0502286	0.00396659	0.0145428	0.00532732
AI854703	0.0115271	0.0576604	0.0217374	0.0209098	0.0150307	0.0401288	0.12489
AI987944	0.0403349	0.0192296	0.0263945	0.0230941	0.0454958	0.0389663	0.0533362
Aida	0.0806043	0.0864308	0.142376	0.101263	0.0880906	0.0755535	0.268501
Aif1	1.76869	0	0.0139747	0.0109236	0.010647	0.0157062	0.0161574
Aif1l	0.0105666	0.00961524	0.113884	0.0109236	0.17859	0.0139612	0.00651605
Aifm1	0.0230527	0.0192296	0.0512198	0.0517871	0.0389255	0.0906263	0.110154
Aifm2	0.00384245	0.0192296	0.0186325	0.0184134	0.0152395	0.0168695	0.0400105
Aifm3	0.0163297	0.0480584	0.0279467	0.238373	0.0198317	0.00988931	0.0864945
Aig1	0.123604	0.0768474	0.14929	0.217995	0.583982	0.31584	0.344653
Aim2	0.103561	0	0.00698752	0.00031211	0.00939443	0.00116347	0.00607578
Aimp1	0.271392	0.393604	0.340436	0.262879	0.351191	0.361477	0.371323
Aimp2	0.0786892	0.0864308	0.0814317	0.06207	0.10295	0.090047	0.105952
Aip	0.270466	0.357707	0.275986	0.211283	0.313722	0.209631	0.468476
Airn	0	0	0.0411375	0.00187266	0.00187891	0.00814418	0.0222761
Ajap1	0.0163297	0.0480584	0.078336	0.0149807	0.0104382	0.0784535	0.260462
Ajuba	0.00768484	0.0192296	0.0628468	0.00124844	0.000730689	0	0.000308194
Ak1	0.248165	0.143735	0.161563	0.269208	0.178179	0.147803	0.36506
AK157302	0.00288184	0.00961524	0.00854027	0.0034332	0.00490604	0.00349039	0.024741
Ak2	0.135036	0.0768474	0.0868473	0.116466	0.127835	0.0906263	0.121787
Ak3	0.0652754	0.191142	0.21799	0.124212	0.413674	0.0819327	0.0617316
Ak4	0.009606	0.0288422	0.0271706	0.0520988	0.00981195	0.0139612	0.0967977
Ak5	0.0124877	0.0384521	0.0163036	0.016229	0.021084	0.0453597	0.121176
Ak6	0.0806043	0.105573	0.103078	0.0723464	0.0871548	0.0883087	0.159061
Ak7	0	0	0.00155279	0	0.000521921	0	0.00264166
Ak8	0.00288184	0	0.000776397	0.00062422	0.000835073	0.00116347	0.00633994
Akain1	0.00768484	0	0.010093	0.00499374	0.00720244	0.00698075	0.0441014
Akap1	0.009606	0.0288422	0.0574219	0.0174773	0.0234843	0.0418726	0.0658178
Akap10	0.021132	0.0576604	0.0333789	0.0131082	0.0189968	0.0314084	0.0469163
Akap11	0.100694	0.200575	0.192139	0.187109	0.174684	0.166191	0.592322
Akap12	0.0374552	0.446549	0.342635	0.0365087	0.02818	0.0842517	0.142868
Akap13	0.427757	0.181691	0.232375	0.050852	0.0115864	0.114352	0.065071
Akap17b	0.0124877	0.0384521	0.046567	0.0411869	0.0251539	0.0453597	0.132793
Akap2	0.00672425	0.0864308	0.26925	0.00842687	0.0235886	0.00349039	0.0177862
Akap5	0.0105666	0	0.00465837	0.00686636	0.00521918	0.0157062	0.0590068
Akap6	0.0412947	0.0864308	0.101534	0.0944289	0.0782083	0.0854109	0.333584
Akap7	0.0451336	0.357707	0.158497	0.0841702	0.0970293	0.15183	0.20147
Akap8	0.106427	0.0480584	0.146986	0.109333	0.0796652	0.106836	0.176557
Akap8l	0.196617	0.209992	0.192901	0.187109	0.149959	0.231776	0.363863
Akap9	0.2351	0.565524	0.417144	0.479816	0.37029	0.493406	0.625511
Akip1	0.0470528	0.0384521	0.0845266	0.0181014	0.0265105	0.0145428	0.0222761
Akirin1	0.283414	0.143735	0.187563	0.160361	0.276022	0.2102	0.227204
Akirin2	0.375369	0.348662	0.237663	0.20548	0.302066	0.211907	0.268543
Akna	0.059523	0.00961524	0.014751	0.00156055	0.000417537	0.00465385	0.0012768
Akr1a1	1.09226	1.14022	1.08487	0.752962	0.939419	0.918315	1.13826
Akr1b10	0.227616	0.0768474	0.049669	0.216165	0.0154482	0.0958393	0.0916254
Akr1b3	0.318324	0.181691	0.14929	0.0711011	0.200941	0.110884	0.138508
Akr1b7	0	0	0	0.00031211	0.000521921	0.00116347	0.00259763
Akr1b8	0	0.00961524	0.00931664	0.00405742	0.000730689	0	0.001585
Akr1c14	0	0	0.0527705	0	0.000104384	0.000581734	0.000176111
Akr1cl	0	0	0	0	0.000208768	0	0.00405053
Akr1e1	0.0508906	0.0288422	0.0419132	0.0533455	0.0783124	0.0813529	0.0668282
Akr7a5	0.160691	0.191142	0.126217	0.139683	0.31581	0.158728	0.157408
Akt1	0.25096	0.143735	0.205841	0.0776373	0.0898581	0.124172	0.222868
Akt1s1	0.156896	0.124677	0.18222	0.138446	0.28235	0.165618	0.174432
Akt2	0.0691092	0.067257	0.0883942	0.0514754	0.0706094	0.0796134	0.0717914
Akt3	0.0163297	0.0480584	0.0729167	0.0265262	0.0231712	0.030827	0.110942
Aktip	0.190017	0.26608	0.327941	0.235641	0.469417	0.285797	0.595415
AL589670.1	0.000960615	0.0288422	0.00931664	0.0209098	0.00177453	0.0157062	0.00550343
AL589692.1	0.000960615	0	0.00543476	0.00530584	0.00417535	0.00116347	0.0107425
AL590144.2	0.056646	0.00961524	0.0077639	0.00124844	0.000730689	0.00232693	0.0043147
AL591952.3	0.0163297	0.00961524	0.0155273	0.00780267	0.0130476	0.00407212	0.0216599
AL603867.1	0	0	0	0	0.000208768	0.00116347	0.00409456
AL732309.1	0	0	0.00155279	0	0.00135699	0	0.00184916
AL732506.1	0	0	0.000776397	0.000936329	0.00177453	0.000581734	0.0123715
Alad	0.05185	0.162742	0.106939	0.0735915	0.0867388	0.142047	0.132444
Alas1	0.111202	0.0480584	0.20356	0.055527	0.0536277	0.0401288	0.0876349
Alcam	0.0777315	0.162742	0.132377	0.432404	0.130734	0.587984	1.01922
Aldh16a1	0.0422545	0.00961524	0.0178562	0.00499374	0.019623	0.00465385	0.0180504
Aldh18a1	0.0153692	0	0.0186325	0.00593005	0.0051148	0.0424538	0.0448052
Aldh1a1	0.0240131	0.581972	0.0357067	0.228043	0.0403857	0.0447785	0.0241688
Aldh1a2	0.00192123	0.228769	0.00388198	0.00124844	0.000626305	0.000581734	0.0149248
Aldh1a3	0.00480306	0.0384521	0.0163036	0.030894	0.0171182	0.0162878	0.0408903
Aldh1b1	0.00384245	0.00961524	0.000776397	0.00218477	0.00146138	0.0157062	0.0288341
Aldh1l1	0.0163297	0.00961524	0.0194087	0.194465	0.0135695	0.0127978	0.0178743
Aldh1l2	0.00864542	0	0.00931664	0.00187266	0.013152	0.0180328	0.0147487
Aldh2	0.225743	0.63843	0.565627	0.338977	0.102638	0.22951	0.138334
Aldh3a2	0.059523	0.0960063	0.0519952	0.03027	0.0652981	0.0459408	0.0667404
Aldh3b1	0.0643168	0.0288422	0.024066	0.00998735	0.0568587	0.00756246	0.00563551
Aldh3b2	0.00672425	0.0288422	0.0178562	0.0159169	0.033501	0.0093076	0.108141
Aldh4a1	0.0153692	0.0576604	0.0442402	0.0352611	0.0268235	0.0255935	0.0437495
Aldh5a1	0.0153692	0.0192296	0.0349308	0.0851032	0.0348572	0.0593021	0.180674
Aldh6a1	0.0441739	0.134212	0.0705935	0.164981	0.19193	0.0854109	0.0756554
Aldh7a1	0.0719839	0.228769	0.0914872	0.164981	0.0781043	0.1051	0.095702
Aldh8a1	0	0	0.00155279	0	0.000104384	0	0.00352221
Aldh9a1	0.072942	0.0576604	0.0535458	0.0611354	0.0840347	0.0459408	0.0666965
Aldoa	1.64491	1.94975	1.91905	2.14602	1.90834	2.05751	1.88983
Aldob	0	0	0	0.00031211	0.000835073	0.0017452	0.0124595
Aldoc	0.896911	1.24183	0.92993	3.08299	0.954763	1.50488	0.773314
Alg1	0.113111	0.0384521	0.0984434	0.091632	0.0666521	0.106257	0.109279
Alg10b	0.021132	0.0768474	0.0333789	0.0283982	0.0198317	0.0360597	0.10223
Alg11	0.0355353	0.00961524	0.0326029	0.0533455	0.0488324	0.0651082	0.202074
Alg12	0.0192111	0.0192296	0.0194087	0.0243422	0.0149264	0.0273381	0.0390426
Alg13	0.00768484	0	0.0108694	0.0106115	0.0241104	0.0127978	0.0302424
Alg14	0.056646	0.067257	0.116969	0.0393157	0.12711	0.062786	0.0899592
Alg2	0.0297747	0.0384521	0.083753	0.152652	0.0719629	0.211907	0.612462
Alg3	0.0556869	0.0768474	0.0287228	0.0514754	0.0346486	0.0662691	0.0445852
Alg5	0.176791	0.0960063	0.0899408	0.13257	0.110008	0.179946	0.137112
Alg6	0.0201715	0.0192296	0.0248422	0.0358849	0.0273452	0.0540749	0.0754798
Alg8	0.0374552	0	0.00854027	0.00811477	0.0135695	0.0221041	0.0230244
Alg9	0.0451336	0.0288422	0.0341549	0.0255902	0.0354832	0.0372224	0.0632695
Alk	0	0	0.00155279	0.00062422	0.000417537	0.0017452	0.00972996
Alkal2	0.000960615	0	0.00232919	0.00031211	0.000208768	0	0.00642799
Alkbh1	0.102606	0.172224	0.0814317	0.118325	0.0936002	0.15528	0.229392
Alkbh2	0.0412947	0.0576604	0.0450159	0.0181014	0.0167007	0.0226857	0.080747
Alkbh3	0.0691092	0.0480584	0.0543211	0.0424342	0.0461214	0.0337341	0.0524129
Alkbh4	0.0201715	0	0.0139747	0.0109236	0.0153439	0.0180328	0.0228484
Alkbh5	0.171114	0.330489	0.379056	0.202728	0.356395	0.283002	0.288966
Alkbh6	0.108337	0.105573	0.142376	0.139064	0.165218	0.16447	0.271134
Alkbh7	0.107382	0.256784	0.122365	0.160361	0.140766	0.127058	0.23792
Alkbh8	0.0288145	0.0768474	0.0636217	0.0458641	0.0441402	0.0749734	0.175603
Alms1	0.00672425	0.00961524	0.0116457	0.0321418	0.00427974	0.030827	0.0648513
Alox12	0	0	0.0163036	0	0	0	0.000176111
Alox5	0.059523	0	0	0.00031211	0.000313152	0.000581734	0.000308194
Alox5ap	1.00349	0	0.012422	0.00624216	0.0051148	0.0145428	0.0417701
Alox8	0.00288184	0	0.00310559	0.0034332	0.00250522	0.00116347	0.0228043
Aloxe3	0.000960615	0.00961524	0.00465837	0.00249688	0.00187891	0.00349039	0.0393066
Alpk1	0.00192123	0	0.0077639	0.00561795	0.000208768	0	0.000528332
Alpk2	0	0	0.000776397	0.00031211	0	0	0.00233346
Alpl	0.00384245	0.067257	0.0829793	0.0583315	0.00438412	0.0127978	0.00427067
Als2	0.00384245	0	0.00931664	0.00998735	0.013987	0.0110527	0.0435736
Als2cl	0.00768484	0.00961524	0.0279467	0.0608239	0.00469727	0.0174511	0.0175221
Alyref	0.219182	0.143735	0.236153	0.145244	0.342335	0.146077	0.186994
Alyref2	0.0815618	0.0960063	0.0457914	0.0393157	0.0379867	0.0680104	0.0948693
Amacr	0.0220923	0.0384521	0.0287228	0.0293341	0.0198317	0.0337341	0.0441894
Ambra1	0.0336152	0.0864308	0.0426889	0.0396276	0.0282843	0.0348969	0.092283
Amd1	0.0345752	0.0480584	0.0876208	0.0573967	0.195823	0.0668496	0.0975864
Amd2	0.0115271	0.0384521	0.0357067	0.012172	0.0398642	0.0203593	0.0551827
Amdhd2	0.072942	0.0864308	0.071368	0.0455523	0.0987954	0.0546557	0.112823
Amer1	0.0249734	0.0192296	0.0574219	0.0483582	0.03444	0.062786	0.0734601
Amer2	0.0470528	0.0384521	0.0450159	0.183734	0.295073	0.209061	0.26391
Amer3	0.00768484	0.00961524	0.010093	0.00312109	0.00271398	0.00349039	0.0529405
Amfr	0.201327	0.143735	0.205841	0.164365	0.186701	0.217592	0.275123
Amh	0.000960615	0	0	0.000936329	0.000417537	0.00290866	0.00475497
Amhr2	0.00192123	0	0.00232919	0.00468163	0.00114822	0.000581734	0.0132519
Amigo1	0.0220923	0	0.0302749	0.0365087	0.014822	0.0215225	0.161538
Amigo2	0.009606	0.0192296	0.0999886	0.0337015	0.00720244	0.00698075	0.181063
Amigo3	0.0115271	0.00961524	0.00388198	0.00312109	0.00313152	0.00232693	0.00603175
Ammecr1	0.00864542	0.00961524	0.0217374	0.00936316	0.0129433	0.0290826	0.0460806
Ammecr1l	0.056646	0.124677	0.0822055	0.081993	0.0532108	0.0720725	0.131746
Amn	0.0201715	0.0192296	0.0155273	0.0249662	0.0182662	0.0267566	0.192789
Amn1	0.0614407	0.0480584	0.0829793	0.136282	0.198997	0.108571	0.219258
Amot	0.00384245	0.00961524	0.0333789	0.0396276	0.00459289	0.00756246	0.0143085
Amotl1	0.0499312	0.256784	0.297606	0.0978463	0.0232756	0.1051	0.24673
Amotl2	0.0124877	0.209992	0.192901	0.03027	0.120792	0.0894676	0.062171
Ampd2	0.0355353	0.067257	0.0682699	0.0959824	0.0301624	0.0581406	0.189893
Ampd3	0.0134482	0.0288422	0.024066	0.0474229	0.00678492	0.169633	0.0590947
Amph	0.0700675	0.0288422	0.104623	0.104988	0.141697	0.143774	0.395051
Amt	0.0182507	0.0480584	0.0372585	0.0987781	0.0336054	0.0622054	0.0856611
Amy1	0.009606	0.0192296	0.00854027	0.0277742	0.0122126	0.0122161	0.085354
Amz1	0.0987826	0.0384521	0.0131984	0.0152928	0.00929005	0.235174	0.0561937
Amz2	0.066234	0.11513	0.100761	0.0714124	0.108244	0.0587213	0.151404
Anapc1	0.0432142	0.0384521	0.0868473	0.0704785	0.0588387	0.0796134	0.14387
Anapc10	0.0633582	0.0576604	0.0767879	0.0477347	0.0561292	0.0854109	0.101223
Anapc11	0.602627	0.86771	0.916612	0.670017	1.27449	0.771614	0.918213
Anapc13	0.58065	0.63843	0.627942	0.543939	0.668669	0.456361	0.450706
Anapc15	0.0806043	0	0.0760137	0.0377563	0.0581093	0.0488462	0.128122
Anapc16	0.188129	0.339589	0.310958	0.280334	0.417513	0.212476	0.230636
Anapc2	0.114066	0.0960063	0.105395	0.0832372	0.138079	0.102207	0.160973
Anapc4	0.0691092	0.0768474	0.0682699	0.0474229	0.0477897	0.0622054	0.157278
Anapc5	0.240704	0.200575	0.367451	0.187109	0.319981	0.283002	0.425353
Anapc7	0.072942	0.067257	0.0891675	0.0424342	0.0643606	0.0929435	0.118465
Ang	0.453115	0.0480584	0.0194087	0.00374531	0.00208768	0.00116347	0.0066041
Angel1	0.00768484	0	0.010093	0.0146686	0.0104382	0.0127978	0.0212638
Angel2	0.112157	0.143735	0.143913	0.131332	0.14149	0.141471	0.211556
Angpt1	0.000960615	0.00961524	0.0380343	0.0171652	0.00167015	0.0232672	0.0235526
Angpt2	0	0.0576604	0.0512198	0.000936329	0.000835073	0.00232693	0.00523927
Angptl1	0.00288184	0	0.00310559	0.00499374	0.000417537	0.0622054	0.00167305
Angptl2	0.000960615	0.134212	0.0504444	0.00218477	0.000626305	0.00232693	0.00290582
Angptl4	0.00576366	0.284604	0.0473426	0.0695444	0.0038622	0.00116347	0.00686826
Angptl6	0.0432142	0.0288422	0.0403617	0.0545921	0.0895463	0.0952602	0.139162
Angptl7	0.00480306	0	0.000776397	0.00031211	0.000626305	0	0.00378637
Ank	0.0834765	0.134212	0.0938065	0.199057	0.601132	0.118397	0.204274
Ank1	0.00576366	0	0.0131984	0.0131082	0.00772435	0.0226857	0.116235
Ank2	0.313751	0.731166	0.460282	1.28828	1.44601	0.834119	1.21478
Ank3	0.086348	0.143735	0.123906	0.103746	0.671209	0.357108	0.738728
Ankdd1a	0.000960615	0	0.00232919	0.00031211	0.000104384	0	0.00541537
Ankdd1b	0	0	0.00232919	0.000936329	0.000626305	0.00116347	0.00136486
Ankef1	0.00288184	0	0.00465837	0.0034332	0.000313152	0.000581734	0.0337188
Ankfn1	0	0	0	0.000936329	0	0.00116347	0.00176111
Ankfy1	0.0758159	0.0480584	0.083753	0.0602008	0.0696722	0.0680104	0.119427
Ankhd1	0.066234	0.153246	0.0984434	0.077015	0.0719629	0.0761335	0.123492
Ankib1	0.0403349	0.0960063	0.0597471	0.0449287	0.200123	0.0743933	0.119952
Ankle1	0	0	0	0.00031211	0.000104384	0.00523558	0.00110069
Ankle2	0.0796468	0.0768474	0.0705935	0.0732802	0.04633	0.0854109	0.103719
Ankmy1	0.00192123	0	0.000776397	0.00124844	0.00104384	0	0.00365429
Ankmy2	0.0460932	0.0384521	0.0643965	0.0461758	0.034127	0.0563983	0.142955
Ankra2	0.14645	0.21939	0.170753	0.232907	0.285861	0.308631	0.337542
Ankrd1	0	0	0.000776397	0.000936329	0.000208768	0.000581734	0.00180513
Ankrd10	0.12837	0.162742	0.136224	0.0975357	0.0691516	0.138014	0.217237
Ankrd11	0.503013	0.581972	0.56696	0.48818	0.559674	1.15724	0.618943
Ankrd12	0.205091	0.321363	0.400683	0.355745	0.35453	0.487706	0.570795
Ankrd13a	0.15215	0.0288422	0.142376	0.0149807	0.182903	0.0302455	0.0587431
Ankrd13b	0.0124877	0.0192296	0.0170799	0.0177893	0.0545658	0.0151245	0.0988133
Ankrd13c	0.059523	0.0288422	0.0868473	0.0664305	0.0823703	0.0854109	0.152623
Ankrd13d	0.0355353	0.0192296	0.0310509	0.0446169	0.0270322	0.0465219	0.173565
Ankrd16	0.0336152	0.0480584	0.0326029	0.0577083	0.0258844	0.0436162	0.087898
Ankrd17	0.150251	0.275353	0.153128	0.160361	0.123175	0.227242	0.412902
Ankrd2	0.000960615	0	0	0.00249688	0.00344467	0.00232693	0.0229804
Ankrd23	0.00192123	0	0.00155279	0.00124844	0.00313152	0.00116347	0.00374234
Ankrd24	0.0528093	0.0384521	0.0574219	0.0810598	0.0766473	0.0703318	0.230121
Ankrd26	0.0403349	0.0576604	0.078336	0.061447	0.099107	0.0772936	0.150708
Ankrd27	0.031695	0.0480584	0.0442402	0.022158	0.0306841	0.0314084	0.0495109
Ankrd28	0.021132	0.0288422	0.0349308	0.0246542	0.183314	0.111462	0.0510059
Ankrd29	0.00768484	0	0.0248422	0.00905106	0.00678492	0.0244304	0.0649831
Ankrd33b	0.00192123	0.00961524	0.0349308	0.00156055	0.000521921	0.00116347	0.0179183
Ankrd34a	0.0163297	0	0.0217374	0.0137324	0.0141958	0.0145428	0.124016
Ankrd34b	0.0115271	0	0.0248422	0.0156049	0.0132564	0.0215225	0.146876
Ankrd34c	0.00288184	0	0.00543476	0.00624216	0.0032359	0.00698075	0.05593
Ankrd35	0.00288184	0.0288422	0.0077639	0.0196617	0.00709806	0.0180328	0.0358748
Ankrd37	0.021132	0	0.103078	0.0333896	0.0378824	0.0360597	0.129694
Ankrd39	0.0432142	0.0768474	0.0938065	0.0542805	0.111564	0.0767136	0.142388
Ankrd40	0.117882	0.0864308	0.175342	0.134736	0.2722	0.0755535	0.11899
Ankrd42	0.00480306	0.0192296	0.00854027	0.00655426	0.00553233	0.010471	0.0519733
Ankrd44	0.225743	0.0864308	0.07911	0.0112357	0.0354832	0.106257	0.118465
Ankrd45	0.00288184	0.0192296	0.0131984	0.00624216	0.00584548	0.00639903	0.0701226
Ankrd46	0.109292	0.209992	0.170753	0.15111	0.249694	0.22951	0.319253
Ankrd49	0.05185	0.0960063	0.0395859	0.0424342	0.0724835	0.0459408	0.0862752
Ankrd50	0.0240131	0.0864308	0.113113	0.0193496	0.0171182	0.0232672	0.105602
Ankrd52	0.009606	0	0.00155279	0.00499374	0.00730682	0.0058173	0.0154091
Ankrd54	0.056646	0.0864308	0.0667207	0.0608239	0.0669646	0.0680104	0.12371
Ankrd55	0.00672425	0.0192296	0.00621114	0.00561795	0.00417535	0.00232693	0.10188
Ankrd6	0.00672425	0.0192296	0.0248422	0.021846	0.0125258	0.0447785	0.135935
Ankrd66	0.00192123	0	0.000776397	0.00905106	0.000730689	0.000581734	0.00118875
Ankrd9	0.026894	0.067257	0.0504444	0.0549037	0.0343356	0.0389663	0.0983751
Anks1	0.0326551	0	0.0651712	0.0720351	0.0307885	0.0151245	0.0367548
Anks1b	0.074858	0.105573	0.0860738	0.101573	0.546229	0.596361	0.49681
Anks3	0.0710258	0.067257	0.0752396	0.0975357	0.0700887	0.0854109	0.158626
Anks6	0.00576366	0	0.00931664	0.00374531	0.00542795	0.0093076	0.0162455
Ankub1	0.00384245	0.0288422	0.00854027	0.00187266	0.162128	0.0017452	0.00325804
Ankzf1	0.0480123	0.0480584	0.0512198	0.0514754	0.0395513	0.0343155	0.100916
Anln	0.0355353	0.067257	0.0574219	0.0181014	0.870259	0.0203593	0.0176542
Ano1	0.00480306	0	0.183747	0.00249688	0.00187891	0.00116347	0.00766074
Ano10	0.0249734	0.0576604	0.058972	0.0315179	0.0520642	0.043035	0.0539078
Ano2	0	0	0	0.00031211	0.000208768	0.0017452	0.00475497
Ano3	0.00480306	0.00961524	0.010093	0.00218477	0.00146138	0.019196	0.0669161
Ano4	0.00864542	0.0192296	0.0263945	0.00530584	0.118512	0.0244304	0.0430897
Ano5	0.000960615	0	0.000776397	0.000936329	0.000208768	0.0017452	0.00986203
Ano6	0.0451336	0.067257	0.15236	0.0580199	0.00438412	0.0651082	0.0894768
Ano7	0.00288184	0	0.000776397	0.00062422	0.000835073	0	0.0148368
Ano8	0.0153692	0.0288422	0.0170799	0.0237181	0.0221276	0.0232672	0.0970168
Anp32a	0.581469	0.321363	0.713518	0.405753	0.308547	0.358747	0.406491
Anp32b	0.338367	0.293831	0.501947	0.160052	0.397584	0.303632	0.221192
Anp32e	0.201327	0.134212	0.230107	0.13288	0.16254	0.184524	0.166751
Anpep	0.000960615	0.0384521	0.058972	0	0.000417537	0	0.000220138
Antxr1	0.009606	0.0192296	0.0170799	0.0505403	0.0116908	0.0488462	0.0272497
Antxr2	0.00288184	0.067257	0.010093	0.00280898	0.000104384	0.00290866	0.000704442
Anxa11	0.0547277	0.0384521	0.126988	0.0109236	0.00438412	0.00349039	0.0134721
Anxa2	0.0758159	0.693147	0.427823	0.0773262	0.0683185	0.11204	0.0943433
Anxa3	1.04143	0.0384521	0.507443	0.00842687	0.00772435	0.00639903	0.0147047
Anxa4	0.0441739	0.00961524	0.0419132	0.00280898	0.00741121	0.00232693	0.00396248
Anxa5	0.295397	0.489796	0.731213	0.329522	0.779566	0.135132	0.131265
Anxa6	0.165431	0.11513	0.198233	0.113675	0.0432016	0.157579	0.133448
Anxa7	0.142647	0.209992	0.28644	0.0838592	0.0446616	0.0726528	0.162581
Anxa9	0.000960615	0	0.00232919	0.00249688	0.00135699	0.000581734	0.00466691
Aoc2	0.000960615	0	0.00621114	0.00187266	0.000521921	0.00116347	0.0113149
Aoc3	0.000960615	0	0.132377	0.00062422	0.000208768	0.000581734	0.000704442
Aox1	0.00768484	0.00961524	0.010093	0.0390038	0.00365344	0.00232693	0.00471094
Aox2	0	0	0	0	0	0	0.00237749
Ap1ar	0.0959143	0.162742	0.160797	0.0807487	0.0886105	0.124172	0.304354
Ap1b1	0.137891	0.0480584	0.077562	0.107781	0.0697764	0.100471	0.282284
Ap1g1	0.0671925	0.0960063	0.0868473	0.0561503	0.0592555	0.0714923	0.190412
Ap1g2	0.0201715	0	0.00621114	0.00873896	0.00532357	0.00232693	0.0226723
Ap1m1	0.0968705	0.067257	0.109255	0.0950503	0.0821622	0.127635	0.175993
Ap1s1	0.205091	0.26608	0.233131	0.182506	0.280644	0.238568	0.541844
Ap1s2	0.213551	0.124677	0.15773	0.117086	0.116853	0.189098	0.43465
Ap1s3	0.00480306	0	0.00465837	0.00405742	0.00167015	0.00232693	0.0293622
Ap2a1	0.16922	0.172224	0.240682	0.205174	1.35862	0.529325	0.285288
Ap2a2	0.242571	0.238128	0.322782	0.299497	0.253639	0.495475	0.823142
Ap2b1	0.299995	0.348662	0.299835	0.245649	0.26646	0.335717	0.523738
Ap2m1	0.718504	0.83297	0.941544	0.627221	0.849427	0.867318	1.08148
Ap2s1	0.676349	0.811723	0.691283	0.647853	0.922396	0.703701	0.810251
Ap3b1	0.0949581	0.0768474	0.0729167	0.0390038	0.0484153	0.0273381	0.0717036
Ap3b2	0.0345752	0.0384521	0.0488936	0.0928752	0.110215	0.133979	0.254455
Ap3d1	0.0940017	0.143735	0.123136	0.138446	0.0930806	0.130519	0.23565
Ap3m1	0.0432142	0.0768474	0.0752396	0.095361	0.1098	0.0813529	0.0957459
Ap3m2	0.0499312	0.0288422	0.0504444	0.061447	0.0472684	0.0894676	0.241728
Ap3s1	0.17206	0.200575	0.27449	0.145244	0.0913135	0.195951	0.381552
Ap3s2	0.0499312	0.0480584	0.0597471	0.0452405	0.0899621	0.0848313	0.147529
Ap4b1	0.0249734	0.0288422	0.0225136	0.012172	0.0180575	0.0151245	0.0224962
Ap4e1	0.0115271	0.00961524	0.0116457	0.00998735	0.0157614	0.0139612	0.0372828
Ap4m1	0.021132	0.00961524	0.0318269	0.0396276	0.0270322	0.0285011	0.0692442
Ap4s1	0.13218	0.21939	0.186037	0.166212	0.181466	0.216456	0.324483
Ap5b1	0.0115271	0	0.00388198	0.00031211	0.00187891	0.0058173	0.00352221
Ap5m1	0.0192111	0.0576604	0.0457914	0.0352611	0.0351702	0.0459408	0.0861436
Ap5s1	0.0547277	0.0576604	0.0597471	0.0773262	0.0674853	0.090047	0.114836
Ap5z1	0.0326551	0.0192296	0.0217374	0.0181014	0.0897542	0.043035	0.0480597
Apaf1	0.0201715	0.0192296	0.014751	0.0124841	0.00855939	0.0157062	0.042078
Apba1	0.039375	0.0192296	0.109255	0.0399394	0.0736287	0.0587213	0.225315
Apba2	0.0307348	0.0288422	0.046567	0.177285	0.0727958	0.171353	0.239675
Apba3	0.0326551	0.067257	0.0574219	0.0371325	0.058005	0.0319899	0.0600177
Apbb1	0.204151	0.420216	0.30132	0.260767	0.892622	0.402644	0.483632
Apbb1ip	0.491071	0.0288422	0.00232919	0.00156055	0.0168051	0.026175	0.00334609
Apbb2	0.0844337	0.11513	0.355799	0.0910104	0.476352	0.131096	0.209618
Apc	0.13218	0.0192296	0.138532	0.278232	0.227571	0.141471	0.246131
Apc2	0.0355353	0.0960063	0.0744653	0.16929	0.0387168	0.206784	0.314308
Apeh	0.066234	0.0288422	0.0419132	0.030894	0.0202491	0.0215225	0.0855733
Apex1	0.202268	0.0864308	0.0636217	0.108712	0.0834106	0.124749	0.173001
Apex2	0.00864542	0.00961524	0.012422	0.00873896	0.00939443	0.0133795	0.0287461
Aph1a	0.171114	0.162742	0.168457	0.156662	0.173245	0.152405	0.128602
Aph1b	0.009606	0.0480584	0.0419132	0.0617585	0.0356918	0.0964183	0.109235
Aph1c	0.0201715	0.00961524	0.010093	0.0436815	0.0143001	0.0587213	0.0259734
Api5	0.11502	0.0576604	0.11774	0.0682989	0.102638	0.0912057	0.131527
Apip	0.0671925	0.105573	0.0876208	0.0757702	0.103469	0.101628	0.0915815
Aplf	0.0144087	0.00961524	0.012422	0.00593005	0.0160745	0.00698075	0.0146607
Apln	0.009606	0.00961524	0.0155273	0.0795042	0.126903	0.00872589	0.011579
Aplp1	0.723792	1.4087	1.10682	1.2759	3.50112	1.43764	1.58768
Aplp2	0.33655	1.05359	1.11879	0.620204	0.840645	1.08915	1.19612
Apmap	0.0643168	0.067257	0.0682699	0.0692331	0.0538362	0.124749	0.186129
Apoa1	0.00384245	0.0192296	0.024066	0.0168531	0.00782873	0.0162878	0.0880735
Apoa2	0.00672425	0.00961524	0.00931664	0.00593005	0.00375782	0.00756246	0.060545
Apobec1	0.057605	0.0288422	0.0209612	0.00624216	0.000835073	0.000581734	0.00101264
Apobec3	0.188129	0.0192296	0.0605221	0.0312059	0.00334029	0.0238488	0.00405053
Apobr	0.0240131	0	0	0.00249688	0.00793311	0.00523558	0.000704442
Apoc1	0.0153692	0	0.010093	0.125761	0.0133608	0.010471	0.0124155
Apoc3	0.000960615	0	0	0.00280898	0.000208768	0	0.00735255
Apod	0.304587	4.51667	0.542148	0.153269	3.00958	0.199375	0.126069
Apoe	3.59336	3.01718	2.33517	4.71235	2.34331	3.41999	1.18272
Apoh	0.000960615	0	0.000776397	0.00156055	0.00146138	0.000581734	0.00396248
Apol6	0	0	0.000776397	0	0.000104384	0.000581734	0.00162902
Apol8	0.00576366	0	0.00388198	0.00124844	0.000939457	0.00232693	0.01334
Apol9a	0	0.00961524	0.00155279	0.00031211	0.000313152	0.000581734	0.0020693
Apold1	0.00576366	0	0.639515	0.00249688	0.00334029	0.00349039	0.0167297
Apoo	0.0489718	0.0192296	0.0736911	0.101884	0.0745655	0.117241	0.188638
Apool	0.0249734	0.0288422	0.0263945	0.0159169	0.0269279	0.0162878	0.0137802
Apopt1	0.168273	0.21939	0.177636	0.173904	0.304061	0.18338	0.234022
App	0.7253	1.3259	1.37933	0.850362	1.87743	1.29482	1.88933
Appbp2	0.0997385	0.0864308	0.110798	0.0959824	0.188855	0.150105	0.242413
Appbp2os	0.000960615	0	0.000776397	0.00124844	0.00146138	0.000581734	0.000924581
Appl1	0.0911322	0.0864308	0.133916	0.0882126	0.131562	0.179374	0.293231
Appl2	0.0691092	0.209992	0.058972	0.333071	0.133631	0.0645276	0.0599737
Aprt	0.22387	0.238128	0.197472	0.131023	0.0877787	0.203366	0.274317
Aptx	0.0777315	0.0768474	0.0721424	0.0664305	0.126282	0.0906263	0.141429
Aqp11	0.0115271	0.00961524	0.130838	0.0411869	0.0118995	0.0215225	0.0706496
Aqp4	0.0528093	0.0960063	0.061297	0.964257	0.043723	0.0139612	0.0377227
Aqp5	0	0	0	0.00156055	0.000313152	0.00756246	0.00162902
Aqp6	0	0	0	0.00031211	0.000208768	0	0.0020693
Aqp9	0.000960615	0	0.00232919	0.0414987	0.00114822	0.000581734	0.00211333
Aqr	0.0911322	0.0864308	0.101534	0.0751477	0.081434	0.105679	0.141124
Ar	0.0134482	0.153246	0.103078	0.0274622	0.0204579	0.036641	0.262718
Araf	0.315581	0.581972	0.469375	0.486231	0.435098	0.553099	1.16676
Arap1	0.086348	0.0768474	0.0395859	0.0230941	0.0306841	0.0226857	0.008101
Arap2	0.0460932	0.0864308	0.170753	0.194771	0.329892	0.0604634	0.0478398
Arap3	0.0815618	0	0.0729167	0	0.000626305	0.0017452	0.00105666
Arc	0.00480306	0.0192296	0.0302749	0.00124844	0.0964059	0.00290866	0.0279539
Arcn1	0.107382	0.191142	0.140838	0.0882126	0.117786	0.0859906	0.202074
Areg	0	0	0	0.00062422	0	0	0.004799
Arel1	0.0297747	0.0384521	0.0434646	0.0215339	0.0402814	0.0447785	0.0816246
Arf1	0.727559	0.825922	0.755899	0.458768	0.553188	0.666291	1.06146
Arf2	0.0614407	0.067257	0.0752396	0.0337015	0.0464343	0.0587213	0.158235
Arf3	0.202268	0.238128	0.237663	0.163749	0.124832	0.186811	0.904776
Arf4	0.717747	0.839985	0.522485	0.368916	0.327714	0.527798	0.520144
Arf4os	0.00192123	0.00961524	0.000776397	0.00312109	0.00156576	0.0017452	0.00708839
Arf5	0.741048	0.753554	0.792504	0.744759	0.738364	1.10279	1.10307
Arf6	0.286183	0.143735	0.338968	0.0795042	0.120792	0.108571	0.145874
Arfgap1	0.0786892	0.0192296	0.124677	0.0888344	0.0966137	0.147228	0.185869
Arfgap2	0.148351	0.143735	0.16003	0.141537	0.19111	0.185668	0.177684
Arfgap3	0.0326551	0.191142	0.0605221	0.0215339	0.106272	0.0273381	0.0670479
Arfgef1	0.0412947	0.0864308	0.0814317	0.06207	0.0681102	0.0854109	0.203195
Arfgef2	0.0172902	0.0288422	0.0357067	0.0184134	0.0425759	0.0209409	0.108579
Arfgef3	0.0374552	0.0768474	0.058972	0.0421224	0.0519599	0.1051	0.44859
Arfip1	0.0336152	0.0864308	0.112341	0.0318298	0.111668	0.0418726	0.0594024
Arfip2	0.0767737	0.0576604	0.130068	0.124522	0.131769	0.123017	0.171092
Arfrp1	0.194732	0.153246	0.177636	0.128238	0.16151	0.1725	0.234537
Arg1	0	0	0.00155279	0.000936329	0.000417537	0.00116347	0.00387442
Arg2	0	0.00961524	0.000776397	0	0.00114822	0.000581734	0.00620786
Arglu1	0.675572	1.19476	0.832228	1.15374	0.704383	0.943717	1.00227
Arhgap1	0.056646	0.0192296	0.151593	0.0449287	0.0448701	0.0563983	0.125676
Arhgap10	0.0105666	0.0480584	0.183747	0.00405742	0.0032359	0.0162878	0.015233
Arhgap11a	0.0288145	0.00961524	0	0.00124844	0.0019833	0.00698075	0.00321401
Arhgap12	0.10165	0.0960063	0.0419132	0.078882	0.0436187	0.0703318	0.142868
Arhgap15	0.0115271	0.00961524	0.0178562	0.00686636	0.1016	0.0139612	0.0249171
Arhgap17	0.120744	0.0480584	0.112341	0.0533455	0.0577966	0.0529131	0.0630498
Arhgap18	0.0297747	0.0864308	0.0318269	0.00561795	0.0019833	0.00232693	0.0501265
Arhgap19	0.0278542	0	0.00698752	0.00156055	0.00240083	0.00407212	0.00638397
Arhgap20	0.0297747	0.284604	0.0426889	0.0430579	0.0324578	0.163322	0.293484
Arhgap21	0.0364953	0.238128	0.0535458	0.103436	0.121413	0.0668496	0.13048
Arhgap22	0.137891	0.0288422	0.0077639	0.00374531	0.0057411	0.0668496	0.0267216
Arhgap23	0.0307348	0.067257	0.071368	0.0318298	0.323454	0.047103	0.0939488
Arhgap24	0.0432142	0.0288422	0.0364826	0.0411869	0.0203535	0.103943	0.16319
Arhgap25	0.150251	0	0.020185	0.00031211	0.000521921	0.000581734	0.000616387
Arhgap26	0.0124877	0.0480584	0.0419132	0.0455523	0.0111689	0.0354783	0.169052
Arhgap27	0.0930453	0.00961524	0.0574219	0.00624216	0.00960319	0.0203593	0.0857488
Arhgap27os1	0.009606	0	0.0108694	0	0.000208768	0	0.00484302
Arhgap27os2	0.0134482	0.0576604	0.0186325	0.021846	0.0169094	0.030827	0.121044
Arhgap28	0	0.00961524	0.000776397	0.00031211	0.000104384	0.00116347	0.0012768
Arhgap29	0.0144087	0.455263	0.441283	0.00499374	0.0044885	0.00116347	0.00717645
Arhgap30	0.215429	0	0	0	0.000730689	0	0.000792498
Arhgap31	0.174899	0.238128	0.534712	0.0981569	0.100769	0.776923	0.0198552
Arhgap32	0.0307348	0.067257	0.0442402	0.0648733	0.0559207	0.0645276	0.200693
Arhgap33	0.0134482	0	0.0271706	0.0234061	0.0405943	0.0459408	0.126812
Arhgap35	0.0336152	0.134212	0.083753	0.0595777	0.0740451	0.153555	0.209834
Arhgap36	0.00864542	0.0192296	0.0186325	0.0118599	0.0125258	0.0157062	0.165405
Arhgap39	0.113111	0.00961524	0.0349308	0.0496051	0.134666	0.0552366	0.148749
Arhgap4	0.0432142	0.00961524	0.000776397	0.00156055	0.000835073	0.000581734	0.0103463
Arhgap42	0.00192123	0.0288422	0.099216	0.0259022	0.00365344	0.0116344	0.0175661
Arhgap44	0.0412947	0.0480584	0.0628468	0.0467994	0.0360047	0.0761335	0.260462
Arhgap45	0.372677	0	0.00310559	0.00156055	0.00135699	0.00116347	0.00312596
Arhgap5	0.525859	0.321363	0.210401	0.601885	0.286362	0.223271	0.270879
Arhgap6	0.0124877	0.0384521	0.112341	0.00780267	0.00761997	0.010471	0.100128
Arhgap8	0	0	0.012422	0.000936329	0	0.000581734	0.00101264
Arhgap9	0.106427	0	0.00388198	0.00062422	0.000417537	0.000581734	0.000792498
Arhgdia	0.853941	0.63843	0.690661	0.365994	0.772748	0.417118	0.52505
Arhgdib	0.875247	0.0192296	0.197472	0.00905106	0.00761997	0.00523558	0.0212197
Arhgdig	0.294477	0.357707	0.290166	0.34899	0.230927	0.419255	1.24546
Arhgef1	0.216367	0.124677	0.179928	0.117706	0.0735246	0.15528	0.143957
Arhgef10	0.0201715	0.0768474	0.058197	0.0530338	0.46152	0.053494	0.0232885
Arhgef10l	0.0288145	0.0384521	0.0302749	0.0461758	0.00887254	0.0505892	0.072538
Arhgef11	0.0153692	0.0384521	0.0442402	0.0274622	0.0184749	0.0302455	0.111117
Arhgef12	0.0901755	0.191142	0.400683	0.382025	0.129181	0.157579	0.291711
Arhgef15	0.0172902	0.0192296	0.14929	0.0246542	0.0204579	0.0354783	0.193524
Arhgef16	0	0	0.00310559	0.000936329	0.000730689	0.000581734	0.00893749
Arhgef17	0.0249734	0.067257	0.232375	0.0474229	0.028806	0.0517512	0.209489
Arhgef18	0.0230527	0.00961524	0.0380343	0.0383801	0.0216058	0.0238488	0.0898276
Arhgef19	0.0105666	0.0192296	0.0163036	0.0838592	0.025467	0.030827	0.00906957
Arhgef2	0.144549	0.0960063	0.284202	0.0436815	0.287665	0.0749734	0.0825461
Arhgef25	0.031695	0.124677	0.248973	0.0661191	0.0212928	0.0546557	0.189028
Arhgef26	0.021132	0.0480584	0.0217374	0.29651	0.0171182	0.0540749	0.0306825
Arhgef28	0.0134482	0.0288422	0.0287228	0.0549037	0.123071	0.0691711	0.0816685
Arhgef3	0.0259337	0.00961524	0.0535458	0.00873896	0.00887254	0.0459408	0.042166
Arhgef33	0.00192123	0	0.00232919	0.00280898	0.00167015	0.00116347	0.0120633
Arhgef37	0	0	0.000776397	0.00062422	0.00281837	0.00116347	0.000792498
Arhgef38	0	0	0	0	0	0	0.00369831
Arhgef4	0.0882619	0.105573	0.0891675	0.185882	0.0576924	0.130519	0.352244
Arhgef40	0.11979	0.228769	0.096898	0.114605	0.0465385	0.161599	0.145046
Arhgef5	0.00384245	0.00961524	0.058972	0.00499374	0.000417537	0	0.000616387
Arhgef6	0.107382	0.0384521	0.0558715	0.0109236	0.0038622	0.0319899	0.0340708
Arhgef7	0.0384151	0.0384521	0.334562	0.0745253	0.0378824	0.0929435	0.175516
Arhgef9	0.0480123	0.0384521	0.0690445	0.109953	0.0620687	0.127058	0.343032
Arid1a	0.31192	0.162742	0.257247	0.198445	0.183211	0.206784	0.311287
Arid1b	0.058564	0.0864308	0.115427	0.0605124	0.0700887	0.0807731	0.172827
Arid2	0.0940017	0.067257	0.112341	0.0984675	0.0610268	0.104522	0.151883
Arid3a	0.0307348	0	0.0163036	0.000936329	0.00720244	0.0017452	0.0314746
Arid3b	0.087305	0.00961524	0.014751	0.00936316	0.00845501	0.00407212	0.0251371
Arid4a	0.236969	0.228769	0.261752	0.130095	0.119652	0.199945	0.361097
Arid4b	0.126464	0.153246	0.173048	0.166212	0.280142	0.182808	0.300271
Arid5a	0.0758159	0.0192296	0.115427	0.0536571	0.0377781	0.0145428	0.0132519
Arid5b	0.174899	0.0480584	0.393493	0.06207	0.482705	0.0714923	0.13986
Arih1	0.0920888	0.0480584	0.108483	0.0810598	0.0824743	0.0871497	0.186778
Arih2	0.059523	0.0576604	0.0674953	0.0467994	0.067277	0.0610441	0.119383
Arl1	0.283414	0.429025	0.377608	0.192627	0.272804	0.340118	0.462727
Arl10	0.0681509	0.0576604	0.0186325	0.0177893	0.024006	0.0162878	0.0353468
Arl11	0.109292	0	0	0.00031211	0.000208768	0	0.000704442
Arl13b	0.031695	0.067257	0.0822055	0.0337015	0.102015	0.0395476	0.0525009
Arl14ep	0.039375	0.0768474	0.0574219	0.0639389	0.068006	0.0859906	0.139336
Arl15	0.0124877	0.00961524	0.0248422	0.00749057	0.00584548	0.019196	0.04199
Arl16	0.0623995	0.105573	0.077562	0.081993	0.0905859	0.113196	0.246217
Arl2	0.307339	0.515346	0.379056	0.455947	1.02569	0.445818	0.592024
Arl2bp	0.188129	0.228769	0.61889	0.343693	0.58007	0.896105	0.477645
Arl3	0.296317	0.53221	0.448338	0.55502	0.436716	0.483032	0.700852
Arl4a	0.039375	0.238128	0.562957	0.0471112	0.0545658	0.174219	0.157452
Arl4c	0.331093	0	0.0643965	0.0558386	0.0287017	0.136861	0.371281
Arl4d	0.0182507	0.209992	0.102306	0.00499374	0.155428	0.00465385	0.0150129
Arl5a	0.0604819	0.0768474	0.0643965	0.0443051	0.0602975	0.0569791	0.176123
Arl5b	0.0336152	0.105573	0.0605221	0.0340134	0.0202491	0.0412913	0.101354
Arl5c	0.0796468	0.0192296	0.0139747	0.00374531	0.000835073	0.0093076	0.00603175
Arl6	0.0460932	0.0864308	0.0961252	0.0978463	0.132183	0.101628	0.191406
Arl6ip1	0.970804	0.90831	0.755899	1.07689	0.971525	1.43371	1.5241
Arl6ip4	0.183408	0.209992	0.257247	0.183427	0.245745	0.226108	0.391989
Arl6ip5	0.349245	0.498346	0.446224	0.352516	0.383825	0.553099	0.67627
Arl6ip6	0.0710258	0.00961524	0.0736911	0.0906996	0.0597765	0.115508	0.112605
Arl8a	0.268612	0.330489	0.257998	0.349284	0.620217	0.426722	0.638503
Arl8b	0.217306	0.143735	0.215714	0.263181	0.286663	0.33076	0.633077
Armc1	0.129322	0.247466	0.227081	0.205785	0.291071	0.241395	0.354688
Armc10	0.0259337	0.0288422	0.0388101	0.0168531	0.0209797	0.0255935	0.0693759
Armc2	0.00672425	0.0288422	0.0232898	0.0209098	0.00876815	0.00698075	0.0526328
Armc3	0.0758159	0	0.00931664	0.00124844	0.000835073	0.000581734	0.000836525
Armc5	0.0671925	0.0576604	0.0426889	0.0246542	0.0242148	0.0325713	0.0349948
Armc6	0.0249734	0.0384521	0.0395859	0.0296461	0.0479983	0.0558174	0.103675
Armc7	0.0201715	0.00961524	0.00931664	0.00780267	0.00876815	0.00523558	0.0266336
Armc8	0.056646	0.0288422	0.0922604	0.0645619	0.0538362	0.0743933	0.199355
Armc9	0.0201715	0.0288422	0.0232898	0.0365087	0.019623	0.0209409	0.13877
Armcx1	0.0288145	0.0480584	0.0899408	0.0698558	0.0688391	0.106257	0.282199
Armcx2	0.0412947	0.0864308	0.079884	0.0443051	0.0359004	0.06743	0.214742
Armcx3	0.0825192	0.153246	0.102306	0.0673648	0.0819542	0.185668	0.244337
Armcx4	0.0144087	0	0.0139747	0.0202858	0.00908129	0.0267566	0.15419
Armcx5	0.0345752	0.0480584	0.0535458	0.0327657	0.0441402	0.0540749	0.12253
Armcx6	0.0134482	0.105573	0.0279467	0.0177893	0.0124214	0.0517512	0.107178
Armt1	0.0326551	0.0576604	0.0256183	0.030582	0.027867	0.0407101	0.0794304
Arnt	0.0384151	0.105573	0.078336	0.0436815	0.0360047	0.0453597	0.0952638
Arnt2	0.0499312	0.0384521	0.046567	0.0872799	0.151095	0.0888881	0.186865
Arntl	0.0144087	0.00961524	0.020185	0.038692	0.0122126	0.0221041	0.073987
Arntl2	0	0	0.0108694	0.00624216	0.0103338	0.00639903	0.0238167
Arpc1a	0.453115	0.662094	0.481906	0.354278	1.50197	0.495992	0.434329
Arpc1b	1.38545	0.375713	0.603265	0.0246542	0.256873	0.0680104	0.0293182
Arpc2	1.33928	0.498346	0.869798	0.292622	0.39052	0.443703	0.418043
Arpc3	0.83372	0.446549	0.623422	0.269208	0.353451	0.399417	0.462766
Arpc4	0.824564	0.393604	0.371809	0.295015	0.300968	0.424058	0.523699
Arpc5	0.521647	0.275353	0.472863	0.211283	0.659835	0.314732	0.370582
Arpc5l	0.46093	0.420216	0.537419	0.49235	0.531508	0.551589	0.79629
Arpin	0.00576366	0.0288422	0.0535458	0.0255902	0.0319361	0.0255935	0.0381187
Arpp19	0.651328	0.622476	0.888493	0.566575	0.941259	0.500638	0.604255
Arpp21	0.0336152	0.0384521	0.0411375	0.13288	0.0260931	0.277406	0.279574
Arrb1	0.0959143	0.0768474	0.065946	0.183734	0.0277626	0.0935227	0.234922
Arrb2	0.485075	0.0384521	0.0597471	0.0430579	0.0488324	0.0790335	0.189417
Arrdc1	0.130275	0	0.0481181	0.0115478	0.0107514	0.0215225	0.0766212
Arrdc2	0.0307348	0.0384521	0.0426889	0.0259022	0.207894	0.0348969	0.0319586
Arrdc3	0.109292	0.0192296	0.0760137	0.0505403	0.397198	0.047103	0.0604132
Arrdc4	0.0336152	0	0.0116457	0.00905106	0.0068893	0.0174511	0.0462566
Arsa	0.05185	0.0576604	0.0326029	0.0492934	0.0536277	0.0232672	0.109542
Arsb	0.240704	0.0576604	0.046567	0.0956717	0.0783124	0.413374	0.137418
Arsg	0.0480123	0.0768474	0.0341549	0.016229	0.484011	0.0180328	0.0233325
Arsj	0.000960615	0	0.000776397	0.00218477	0.000626305	0.0180328	0.013428
Arsk	0.058564	0.0576604	0.0349308	0.0810598	0.033814	0.0441974	0.0178743
Art3	0.00576366	0	0.209641	0.0034332	0.145726	0.00232693	0.00554745
Art5	0	0	0	0	0	0	0.00193721
Artn	0.000960615	0	0.0077639	0.00187266	0.00114822	0.00290866	0.0142645
Arv1	0.009606	0.0288422	0.0077639	0.0143566	0.0104382	0.0110527	0.0341148
Arvcf	0.0460932	0.0192296	0.0682699	0.0330776	0.0237973	0.0906263	0.0815808
Arxes1	0.0297747	0.067257	0.0372585	0.256238	0.0239017	0.378343	0.334834
Arxes2	0.0940017	0.172224	0.0961252	0.730424	0.0635272	0.617384	0.623349
As3mt	0.1531	0.0960063	0.140069	0.0975357	0.0971332	0.108571	0.132269
Asah1	0.767683	0.162742	0.156196	0.332184	0.121931	0.35984	0.222094
Asah2	0.00768484	0	0.00698752	0.00280898	0.0175356	0.00872589	0.0187547
Asap1	0.234165	0.247466	0.199756	0.264387	0.150372	0.291938	0.240402
Asap2	0.0288145	0.124677	0.198233	0.174211	0.0920412	0.124749	0.149358
Asap3	0.021132	0	0.0077639	0.00561795	0.0051148	0.0180328	0.0190628
Asb1	0.0201715	0.0192296	0.0263945	0.0193496	0.036422	0.0221041	0.0934666
Asb10	0.0192111	0	0.0155273	0	0	0	0.000396249
Asb11	0.000960615	0	0.0209612	0	0.000104384	0	0.000176111
Asb13	0.0643168	0.0480584	0.069819	0.0567735	0.0314145	0.0685908	0.100653
Asb16	0.000960615	0.00961524	0.00543476	0.00249688	0.00208768	0.00232693	0.0334548
Asb18	0	0	0	0.00062422	0.000417537	0	0.00321401
Asb2	0.0853909	0	0.402836	0.000936329	0.0026096	0.0017452	0.00849723
Asb3	0.0384151	0.0576604	0.0519952	0.0436815	0.0443487	0.0622054	0.0911869
Asb4	0.0124877	0.00961524	0.049669	0.0193496	0.014822	0.026175	0.196419
Asb5	0.000960615	0.00961524	0.020185	0.00124844	0.0032359	0.000581734	0.00515121
Asb6	0.0412947	0.0864308	0.0543211	0.0280862	0.0475812	0.0395476	0.0724941
Asb7	0.0259337	0.0384521	0.0450159	0.0371325	0.0355875	0.0343155	0.0812736
Asb8	0.087305	0.067257	0.107711	0.102815	0.121103	0.110884	0.146397
Ascc1	0.112157	0.0576604	0.0767879	0.0414987	0.0830985	0.0587213	0.121088
Ascc2	0.0326551	0.00961524	0.0287228	0.0243422	0.0352745	0.0290826	0.0575124
Ascc3	0.0508906	0.0384521	0.0566467	0.0399394	0.0561292	0.0523321	0.117591
Ascl1	0.00288184	0	0.0077639	0.0152928	0.00344467	0.244785	0.0195911
Ascl2	0.0105666	0.0288422	0.00465837	0.000936329	0.000208768	0	0.00347818
Ascl4	0.000960615	0	0	0.00062422	0.000626305	0.00116347	0.00264166
Asf1a	0.0652754	0.0768474	0.0868473	0.0639389	0.0947434	0.0796134	0.0689367
Asf1b	0.00768484	0	0.00621114	0.00124844	0.00344467	0.00988931	0.0094658
Asgr1	0	0.00961524	0	0.00031211	0.000939457	0.0017452	0.00440275
Ash1l	0.177737	0.172224	0.246713	0.240496	0.162849	0.237437	0.350918
Ash2l	0.0920888	0.0480584	0.069819	0.0664305	0.0956786	0.0749734	0.137069
Asic1	0.0182507	0.0384521	0.024066	0.0524105	0.0175356	0.353827	0.224543
Asic2	0.0230527	0.0288422	0.0287228	0.0611354	0.0140914	0.134556	0.22729
Asic3	0	0	0	0.00062422	0.00521918	0.00407212	0.00695631
Asic4	0.00480306	0.00961524	0.00310559	0.00624216	0.00146138	0.0929435	0.0160694
Asl	0.0978266	0.0768474	0.061297	0.050852	0.0387168	0.0969973	0.171396
Asna1	0.206973	0.191142	0.167691	0.176055	0.260408	0.215319	0.222524
Asns	0.0489718	0.0288422	0.0512198	0.0517871	0.0399685	0.0923643	0.201038
Asnsd1	0.0892188	0.0480584	0.0519952	0.0399394	0.0712341	0.0738131	0.0784209
Aspa	0.039375	0.0960063	0.0519952	0.0511637	0.921177	0.0180328	0.019371
Aspdh	0.000960615	0	0.00155279	0.00031211	0.00302713	0.00232693	0.0129438
Aspg	0	0.0576604	0.000776397	0.00749057	0.000208768	0	0.000528332
Asph	0.281567	0.134212	0.136993	0.174211	0.0271365	0.128212	0.299765
Asphd1	0.00768484	0.0384521	0.0163036	0.00905106	0.0137783	0.0133795	0.105952
Asphd2	0.031695	0.00961524	0.0357067	0.0947396	0.0549827	0.131673	0.327826
Aspm	0	0	0	0.00187266	0	0.00988931	0.00356623
Aspn	0.00864542	0	0.608488	0.00031211	0.000730689	0.00116347	0.00171708
Asprv1	0	0	0	0	0.000521921	0	0.00369831
Aspscr1	0.131227	0.105573	0.144681	0.117396	0.172628	0.132249	0.159061
Asrgl1	0.100694	0.181691	0.114655	0.698631	0.414827	0.479911	0.122093
Ass1	0.0691092	0.0960063	0.107711	0.0851032	0.0668604	0.12244	0.291627
Aste1	0.0336152	0.0384521	0.0434646	0.0265262	0.0215015	0.0581406	0.0681021
Astn1	0.0278542	0.0384521	0.046567	0.199669	0.0175356	0.189098	0.390722
Astn2	0.00384245	0.00961524	0.0108694	0.016229	0.00490604	0.0906263	0.124234
Asxl1	0.0614407	0.0192296	0.0566467	0.0290221	0.0467471	0.0465219	0.112211
Asxl2	0.0901755	0.105573	0.107711	0.136591	0.0927688	0.128212	0.163233
Asxl3	0.00384245	0.00961524	0.00698752	0.00468163	0.0330837	0.0325713	0.0924584
Atad1	0.116928	0.105573	0.146986	0.188949	0.190598	0.315286	0.380157
Atad2	0.0201715	0.00961524	0.0225136	0.012172	0.00814187	0.0238488	0.0346868
Atad2b	0.0556869	0.0768474	0.090714	0.0922536	0.0797692	0.0790335	0.109979
Atad3a	0.066234	0.0960063	0.058972	0.0701671	0.0655064	0.11204	0.157756
Atad3aos	0.000960615	0.067257	0.00931664	0.0152928	0.0211884	0.00814418	0.0113149
Atad5	0.0115271	0.00961524	0.0163036	0.0127962	0.0110645	0.0133795	0.0252692
Atat1	0.0758159	0.181691	0.0736911	0.136591	0.250402	0.1725	0.222438
Atcay	0.0307348	0.0384521	0.0481181	0.0536571	0.0435145	0.181663	0.390559
Atcayos	0.00480306	0	0.192139	0.00062422	0.000417537	0.00407212	0.0143525
Ate1	0.121697	0.162742	0.207362	0.20334	0.155531	0.195381	0.377941
Atf1	0.137891	0.067257	0.109255	0.042746	0.0474769	0.0453597	0.0925022
Atf2	0.0758159	0.067257	0.135455	0.109953	0.127628	0.120707	0.340663
Atf3	1.59291	0.0192296	0.837897	0.0159169	0.0107514	0.00988931	0.0201193
Atf4	0.452245	0.393604	0.495057	0.229564	0.245137	0.299182	0.412699
Atf5	0.0336152	0.228769	0.264003	0.0312059	0.0541489	0.0238488	0.0684975
Atf6	0.0451336	0	0.0364826	0.0168531	0.0326664	0.0267566	0.0590068
Atf6b	0.127417	0.11513	0.0930334	0.0885235	0.140146	0.175365	0.106565
Atf7	0.0508906	0.124677	0.0667207	0.0642504	0.072067	0.0447785	0.047532
Atf7ip	0.109292	0.124677	0.150057	0.169598	0.201248	0.230076	0.176253
Atg10	0.0480123	0.00961524	0.0512198	0.0340134	0.0623812	0.038385	0.111467
Atg101	0.168273	0.191142	0.160797	0.097225	0.137251	0.224974	0.201944
Atg12	0.0643168	0.067257	0.112341	0.0816819	0.0794571	0.0755535	0.180284
Atg13	0.0403349	0.0576604	0.11157	0.0499168	0.0620687	0.0645276	0.171135
Atg14	0.0480123	0.0768474	0.0535458	0.0368206	0.0526896	0.0482651	0.0868893
Atg16l1	0.0547277	0.00961524	0.0868473	0.0542805	0.0585261	0.0610441	0.131091
Atg16l2	0.021132	0.0480584	0.0690445	0.0461758	0.0228581	0.0691711	0.114092
Atg2a	0.0249734	0.0288422	0.0395859	0.0343253	0.0322491	0.0279196	0.0940365
Atg2b	0.0201715	0.00961524	0.0225136	0.0143566	0.0183706	0.0314084	0.0670918
Atg3	0.186241	0.105573	0.163862	0.124522	0.265855	0.165618	0.141298
Atg4a	0.0134482	0.00961524	0.0450159	0.00842687	0.0227538	0.00756246	0.0108746
Atg4b	0.066234	0.0576604	0.090714	0.0711011	0.116646	0.127058	0.171352
Atg4c	0.058564	0.0576604	0.0519952	0.0480464	0.248985	0.0703318	0.131047
Atg4d	0.066234	0.0768474	0.090714	0.0452405	0.117579	0.06743	0.114005
Atg5	0.176791	0.0480584	0.0953523	0.075459	0.0864268	0.10105	0.142737
Atg7	0.0508906	0.0576604	0.0488936	0.030582	0.0450787	0.0447785	0.0552706
Atg9a	0.0460932	0.153246	0.090714	0.122044	0.0950551	0.118397	0.235607
Atg9b	0.00576366	0.0480584	0.014751	0.0127962	0.00553233	0.010471	0.156756
Atic	0.0691092	0.0576604	0.0442402	0.0446169	0.0462257	0.0871497	0.122312
Atl1	0.0499312	0.0768474	0.0535458	0.0639389	0.0932884	0.15528	0.451863
Atl2	0.0412947	0.0384521	0.0822055	0.207008	0.0274496	0.036641	0.157756
Atl3	0.009606	0.0192296	0.0271706	0.00905106	0.0391341	0.0232672	0.0251812
Atm	0.0105666	0.00961524	0.0155273	0.016229	0.0234843	0.0273381	0.0412422
Atmin	0.0671925	0	0.0372585	0.0343253	0.0336054	0.0540749	0.163016
Atn1	0.058564	0.134212	0.104623	0.107161	0.123382	0.0941019	0.215086
Atoh7	0	0	0.00232919	0.000936329	0.00104384	0.00290866	0.028482
Atoh8	0	0.00961524	0.00543476	0.00187266	0.000417537	0.0058173	0.00118875
Atox1	1.16427	0.839985	1.55047	0.745727	0.929616	0.694427	0.759348
Atp10a	0.00384245	0	0.145449	0.00031211	0.000208768	0.000581734	0.0038304
Atp10b	0.00192123	0	0.00232919	0.00031211	0.0354832	0.00407212	0.001585
Atp11a	0.0345752	0.0384521	0.0760137	0.0573967	0.184033	0.0587213	0.117722
Atp11b	0.0470528	0.0576604	0.0930334	0.0913212	0.0522726	0.0848313	0.201815
Atp11c	0.0182507	0.0384521	0.0411375	0.0134203	0.00929005	0.0255935	0.0565454
Atp13a1	0.0643168	0.0480584	0.0442402	0.0542805	0.0355875	0.0685908	0.106784
Atp13a2	0.139794	0.0960063	0.0682699	0.0882126	0.0604017	0.16447	0.329329
Atp13a3	0.0911322	0.11513	0.0930334	0.0421224	0.0312058	0.0877292	0.173521
Atp13a4	0.0172902	0.00961524	0.0232898	0.315882	0.0144045	0.0238488	0.0168178
Atp13a5	0.00864542	0	0.263253	0.0452405	0.00365344	0.000581734	0.0044908
Atp1a1	0.282491	0.124677	0.216473	0.103125	0.435669	0.387009	0.354936
Atp1a2	0.623546	2.84783	2.12203	3.10331	0.453974	1.41251	0.315985
Atp1a3	0.200385	0.393604	0.347762	0.359263	0.16254	0.598818	1.64575
Atp1b1	0.44789	0.960656	1.09098	0.965711	0.41617	1.12725	2.46407
Atp1b2	0.369983	0.874558	1.03932	2.53172	0.269583	0.937806	0.652879
Atp1b3	0.31741	0.646353	0.336766	0.112435	1.07181	0.318054	0.30006
Atp23	0.026894	0.0192296	0.0178562	0.0124841	0.00939443	0.0255935	0.0481037
Atp2a2	0.162587	0.321363	0.71597	0.686392	0.229911	0.332964	0.82447
Atp2a3	0.00576366	0	0.124677	0	0.000208768	0.000581734	0.00123277
Atp2b1	0.378953	0.375713	0.563625	0.295912	0.230724	0.662978	1.41702
Atp2b2	0.0432142	0.0480584	0.0550963	0.130095	0.0292234	0.114352	0.538895
Atp2b3	0.00192123	0.00961524	0.00310559	0.00218477	0.00250522	0.00814418	0.0952638
Atp2b4	0.0153692	0.143735	0.230863	0.0739027	0.0113776	0.0546557	0.286768
Atp2c1	0.200385	0.256784	0.249725	0.21647	0.274916	0.248172	0.342492
Atp2c2	0	0	0	0	0	0.00116347	0.00453483
Atp4a	0	0	0.00310559	0.000936329	0.000730689	0.00756246	0.0118432
Atp5a1	0.841423	0.928176	1.04273	0.920331	0.719162	0.908264	1.01762
Atp5b	1.28429	1.45646	1.58155	1.52801	1.24383	1.62154	1.3577
Atp5c1	0.749976	0.700822	0.845235	0.817749	0.780752	0.749298	0.745256
Atp5d	1.00473	1.16233	1.2304	1.27848	1.17985	1.2802	1.21536
Atp5e	1.33409	1.39081	1.61919	1.51027	1.34205	1.47138	1.49029
Atp5f1	0.687181	0.662094	0.722695	0.838132	0.845346	0.921117	1.05669
Atp5g1	1.27387	1.58475	1.46666	1.67311	1.52789	1.6801	1.81762
Atp5g2	1.0911	0.881374	1.05533	1.009	1.15342	1.00295	0.840605
Atp5g3	0.776462	1.07728	1.08957	1.22012	0.823383	1.14351	1.40587
Atp5h	1.38771	1.68581	1.64896	1.69938	1.69296	1.6847	1.54404
Atp5j	1.5018	1.76225	1.97146	1.88998	1.60122	1.78784	1.92
Atp5j2	1.5244	1.71638	1.74183	1.86138	1.64039	1.88146	1.77777
Atp5k	1.12032	1.29691	1.53364	1.6002	1.34286	1.60617	1.56615
Atp5l	1.49935	1.91705	1.85488	1.88146	1.67233	1.7967	1.82525
Atp5o.1	0.864977	1.15132	0.979893	1.31891	1.04053	1.21508	1.18171
Atp5s	0.026894	0.0864308	0.0326029	0.0293341	0.0506047	0.0500082	0.123055
Atp6ap1	0.610701	0.677692	0.299835	0.350754	0.554271	0.622239	0.777195
Atp6ap1l	0.000960615	0	0.00155279	0.0034332	0.00135699	0.0517512	0.0066041
Atp6ap2	0.375369	0.21939	0.197472	0.296211	0.319684	0.348351	0.715372
Atp6v0a1	0.150251	0.153246	0.160797	0.17667	0.122346	0.196522	0.634462
Atp6v0a2	0.133132	0.0384521	0.065946	0.0704785	0.0751901	0.0958393	0.0939488
Atp6v0b	1.51397	1.12336	1.12062	1.54508	1.57153	1.87189	1.7556
Atp6v0c	0.0614407	0.00961524	0.00310559	0.00468163	0.00501042	0.00872589	0.0180944
Atp6v0d1	0.31741	0.293831	0.294632	0.319149	0.425748	0.490299	0.510686
Atp6v0e	0.793869	0.662094	0.675665	1.0824	0.461426	1.35292	0.125763
Atp6v0e2	0.158794	0.321363	0.40642	0.426125	0.640481	0.780892	1.27287
Atp6v1a	0.271392	0.446549	0.372534	0.382607	0.381007	0.469474	1.05963
Atp6v1b2	0.357378	0.402505	0.322044	0.434398	0.363644	0.497541	0.917121
Atp6v1c1	0.344717	0.348662	0.271497	0.281835	0.293173	0.319714	0.620927
Atp6v1c2	0.000960615	0.00961524	0	0.00062422	0.000835073	0.000581734	0.00567954
Atp6v1d	0.387001	0.420216	0.455371	0.45905	0.464908	0.46581	0.812146
Atp6v1e1	0.800346	1.18942	0.951495	1.10048	1.20405	1.16685	1.09774
Atp6v1f	1.19928	1.15132	1.14733	1.17222	1.26557	1.29985	1.34825
Atp6v1g1	1.16918	1.15684	1.03883	0.879165	1.33246	0.905032	0.984982
Atp6v1g2	0.394135	0.614446	0.468677	0.550433	0.379256	0.598818	1.2921
Atp6v1h	0.112157	0.143735	0.148522	0.124522	0.122657	0.189098	0.321932
Atp7a	0.0230527	0.0480584	0.0194087	0.0177893	0.0147176	0.010471	0.0206035
Atp7b	0.00288184	0	0.00310559	0.0271502	0.00271398	0.0127978	0.008101
Atp8a1	0.1512	0.0480584	0.14929	0.125451	0.365307	0.162174	0.515304
Atp8a2	0.104517	0.0288422	0.0326029	0.0274622	0.019936	0.0691711	0.223813
Atp8b1	0.00672425	0.00961524	0.0519952	0.00031211	0.0195186	0.00116347	0.0040065
Atp8b2	0.00384245	0.0192296	0.0271706	0.00905106	0.00240083	0.0151245	0.0722745
Atp8b3	0.00192123	0.00961524	0.00388198	0.00156055	0.00135699	0.000581734	0.0131199
Atp8b5	0	0	0	0.00124844	0.00250522	0	0.00457886
Atp9a	0.0796468	0.228769	0.118511	0.0872799	0.430809	0.346706	0.762793
Atp9b	0.0556869	0.0288422	0.0411375	0.0449287	0.0375694	0.0703318	0.133317
Atpaf1	0.0374552	0.0576604	0.0426889	0.0446169	0.0685267	0.0500082	0.12454
Atpaf2	0.0528093	0.0384521	0.0628468	0.0455523	0.0436187	0.0476841	0.125982
Atpif1	1.61224	1.57716	1.75833	1.74117	1.30494	1.89523	2.07452
Atr	0.0326551	0.0576604	0.0271706	0.0502286	0.0303711	0.0517512	0.117635
Atraid	0.564207	0.860828	0.466581	0.938877	0.771396	0.980949	0.62672
Atrip	0.0739001	0.0384521	0.0395859	0.0312059	0.0384039	0.0662691	0.0695516
Atrn	0.0336152	0.0864308	0.071368	0.100642	0.156562	0.116664	0.25829
Atrnl1	0.00384245	0.0768474	0.0163036	0.0118599	0.0038622	0.0174511	0.0819757
Atrx	0.215429	0.26608	0.326468	0.27703	0.226656	0.321374	0.354936
Atxn1	0.0806043	0.0576604	0.177636	0.146171	0.102846	0.157004	0.290613
Atxn10	0.252822	0.284604	0.154662	0.218909	0.195311	0.342315	0.341578
Atxn1l	0.0220923	0.0192296	0.0450159	0.0190376	0.0374651	0.0255935	0.0433097
Atxn2	0.0844337	0.0960063	0.099216	0.153269	0.185469	0.151255	0.266078
Atxn2l	0.114066	0.0576604	0.14929	0.141846	0.112186	0.143198	0.288628
Atxn3	0.0201715	0.0288422	0.0294988	0.0118599	0.0331881	0.0116344	0.0525009
Atxn7	0.0604819	0.0576604	0.0930334	0.0779485	0.0291191	0.0360597	0.0936858
Atxn7l1	0.0489718	0.0480584	0.0450159	0.0489817	0.0295364	0.0250119	0.146223
Atxn7l2	0.0115271	0	0.0155273	0.0190376	0.00970757	0.00988931	0.0379867
Atxn7l3	0.0336152	0.067257	0.058972	0.0352611	0.0505005	0.0494272	0.18946
Atxn7l3b	0.703299	1.20009	0.989564	1.04506	1.42651	1.32698	1.1454
AU019823	0.0460932	0.0384521	0.0729167	0.0449287	0.0612352	0.0505892	0.0781136
AU020206	0.0940017	0.00961524	0.0178562	0.00374531	0.000417537	0.00116347	0.0012768
AU021092	0	0.00961524	0.147754	0	0	0.000581734	0.000308194
AU022252	0.026894	0.0288422	0.0605221	0.0446169	0.0606101	0.0662691	0.0904415
AU022754	0.00192123	0	0.000776397	0.00156055	0.000313152	0.000581734	0.00466691
AU023762	0	0	0	0.00062422	0.000208768	0	0.00228944
AU040320	0.0307348	0.0192296	0.0333789	0.0414987	0.0706094	0.0453597	0.122661
AU040972	0	0	0	0.000936329	0.00584548	0.00116347	0.000396249
AU041133	0.0144087	0.0192296	0.012422	0.0127962	0.0138826	0.026175	0.0549189
Auh	0.13218	0.172224	0.165394	0.173289	0.333057	0.217024	0.326155
Aunip	0	0	0.000776397	0.00062422	0.000835073	0.000581734	0.00228944
Aup1	0.32745	0.124677	0.163862	0.20548	0.234586	0.21475	0.219086
Aurka	0	0	0.00232919	0.00218477	0.0038622	0.00523558	0.0030379
Aurkaip1	0.421597	0.700822	0.613696	0.588952	0.658046	0.68977	0.861497
Auts2	0.059523	0.557248	0.164628	0.473942	0.213102	0.2102	0.591464
AV099323	0.00672425	0.00961524	0.00931664	0.00405742	0.00365344	0.00116347	0.00184916
Aven	0.0307348	0.0192296	0.0411375	0.022158	0.323255	0.0302455	0.0433097
Avil	0.0134482	0.0288422	0.014751	0.0187255	0.0157614	0.0180328	0.0327947
Avl9	0.0489718	0.0864308	0.096898	0.0511637	0.0771676	0.0761335	0.209747
Avp	0.00192123	0	0.00155279	0.00062422	0.000730689	0	0.00801295
Avpi1	0.0528093	0.0960063	0.160797	0.097225	0.0614436	0.0772936	0.179417
Avpr1a	0	0.0192296	0.000776397	0.00062422	0.000521921	0.00116347	0.0136041
AW011738	0.00768484	0	0.0705935	0.012172	0.000939457	0.00232693	0.00294985
AW112010	0.074858	0	0.179164	0.00031211	0.000417537	0.00232693	0.00074847
AW121686	0	0	0	0	0.000208768	0	0.0043147
AW146154	0.0172902	0.00961524	0.0186325	0.0140445	0.0192055	0.00988931	0.0324427
AW209491	0.0508906	0.0480584	0.0651712	0.0561503	0.0476855	0.0726528	0.173955
AW495222	0.00288184	0.00961524	0.00388198	0.00436952	0.0038622	0.0186144	0.0210877
AW549877	0.0537685	0.0960063	0.0945794	0.089767	0.0954708	0.0941019	0.138246
AW551984	0.0307348	0.0864308	0.0504444	0.0424342	0.0279713	0.0546557	0.400227
AW554918	0.009606	0.0288422	0.024066	0.0102994	0.0193099	0.00756246	0.0444533
Axdnd1	0	0	0.000776397	0.00593005	0.000208768	0	0.00149694
Axin1	0.0345752	0.0288422	0.058197	0.0140445	0.0309971	0.0215225	0.0457288
Axin2	0.00768484	0.0960063	0.131607	0.012172	0.014822	0.0296641	0.0623028
Axl	0.0336152	0.393604	0.278229	0.111504	0.00772435	0.0633665	0.00990606
AY036118	0.0134482	0.0288422	0.0232898	0.0283982	0.0208753	0.0372224	0.0728453
AY074887	0.00480306	0	0.00310559	0.00249688	0.00125261	0.0017452	0.0082771
Azi2	0.118836	0.11513	0.146218	0.0993993	0.128767	0.11204	0.256501
Azin1	0.175845	0.134212	0.118511	0.118945	0.10243	0.151255	0.189071
Azin2	0.0172902	0.0576604	0.0442402	0.0318298	0.0103338	0.0505892	0.112648
B130006D01Rik	0.0288145	0.00961524	0.0116457	0.00873896	0.00542795	0.00698075	0.0327507
B130046B21Rik	0	0	0	0.00031211	0.000417537	0.00116347	0.00488705
B230110G15Rik	0	0	0	0.00031211	0.000104384	0	0.00110069
B230112J18Rik	0	0	0	0.00374531	0.000417537	0.00232693	0.00118875
B230118H07Rik	0.111202	0.11513	0.138532	0.188335	0.306454	0.195951	0.174779
B230208H11Rik	0.00192123	0	0.00543476	0.00468163	0.00114822	0.000581734	0.00343415
B230209E15Rik	0.086348	0.0768474	0.101534	0.135973	0.111253	0.30641	0.749038
B230217C12Rik	0.0671925	0.11513	0.0945794	0.0894562	0.0894423	0.118397	0.34324
B230217O12Rik	0.0201715	0.0288422	0.024066	0.0209098	0.019936	0.0314084	0.134539
B230219D22Rik	0.35828	0.472595	0.706756	0.335139	0.640826	0.390251	0.62939
B230303O12Rik	0.000960615	0.00961524	0.00155279	0.00593005	0.00281837	0.00349039	0.0112268
B230307C23Rik	0.0182507	0.105573	0.0248422	0.0243422	0.0245278	0.0221041	0.05083
B230311B06Rik	0.00672425	0	0.00698752	0.0757702	0.011482	0.00872589	0.00730852
B230312C02Rik	0.0278542	0.0192296	0.046567	0.0492934	0.0297451	0.0412913	0.192487
B230317F23Rik	0.00384245	0	0.00310559	0.00780267	0.00187891	0.00639903	0.0302424
B230322F03Rik	0.00192123	0.00961524	0.0131984	0.00499374	0.00720244	0.00756246	0.021924
B230323A14Rik	0.00576366	0	0.00621114	0.0779485	0.00375782	0.00232693	0.00493108
B230334C09Rik	0.00672425	0.0192296	0.0186325	0.0159169	0.00678492	0.0685908	0.200693
B230344G16Rik	0.000960615	0.00961524	0.00543476	0.00156055	0.0685267	0.00290866	0.00352221
B230354K17Rik	0.0124877	0.00961524	0.0225136	0.0321418	0.0272409	0.062786	0.0816246
B230369F24Rik	0.0115271	0.00961524	0.0263945	0.016229	0.0161788	0.0157062	0.0619513
B230398E01Rik	0.00192123	0	0	0.00124844	0.00104384	0.000581734	0.00272971
B2m	2.8086	0.860828	1.23749	0.478139	0.154293	0.672898	0.224156
B3galnt1	0.086348	0.0192296	0.058197	0.0202858	0.0402814	0.091785	0.239846
B3galnt2	0.00768484	0.0288422	0.0279467	0.0127962	0.0122126	0.0162878	0.0364468
B3galt1	0.00480306	0	0.0194087	0.0296461	0.0271365	0.0186144	0.114136
B3galt2	0.00768484	0	0.014751	0.151418	0.0127345	0.0221041	0.106915
B3galt4	0.0451336	0.00961524	0.0139747	0.0124841	0.0259887	0.0203593	0.0302864
B3galt5	0.0240131	0.0192296	0.0178562	0.0265262	0.204214	0.00698075	0.0748212
B3galt6	0.0422545	0.0192296	0.0294988	0.0396276	0.0413244	0.090047	0.145133
B3gat1	0.0288145	0.0288422	0.0302749	0.0396276	0.103261	0.198234	0.26059
B3gat2	0.0326551	0.0192296	0.0294988	0.0424342	0.0244235	0.310851	0.21586
B3gat3	0.130275	0.26608	0.154662	0.194465	0.22869	0.187955	0.563048
B3glct	0.0240131	0.0288422	0.0178562	0.0259022	0.0168051	0.0447785	0.0886436
B3gnt2	0.00192123	0.00961524	0.0217374	0	0.00532357	0.00116347	0.0156292
B3gnt4	0.00288184	0	0.00388198	0.00374531	0.0173269	0.00523558	0.0176982
B3gnt5	0	0	0.00155279	0.00062422	0.000521921	0.0174511	0.00462289
B3gnt6	0	0	0.000776397	0	0.000417537	0.00116347	0.0040065
B3gnt7	0.00384245	0	0	0.000936329	0.000208768	0.0314084	0.00515121
B3gnt8	0.00480306	0.0384521	0.00698752	0.00124844	0.000417537	0	0.00220138
B3gnt9	0.00576366	0.0864308	0.020185	0.00187266	0.100769	0.00698075	0.0243449
B3gntl1	0.00192123	0	0.0077639	0.00624216	0.00605424	0.00639903	0.0121513
B430010I23Rik	0.0739001	0.0480584	0.210401	0.0299581	0.168821	0.00407212	0.0832043
B430218F22Rik	0	0	0.00155279	0.00062422	0.000417537	0.0017452	0.00664813
B430219N15Rik	0.000960615	0	0.00155279	0.00124844	0.000417537	0	0.00114472
B430305J03Rik	0.000960615	0	0.000776397	0.00031211	0.000417537	0.0017452	0.00268568
B4galnt1	0.074858	0	0.0217374	0.0265262	0.0215015	0.16906	0.210135
B4galnt4	0.009606	0.00961524	0.0225136	0.0177893	0.0122126	0.0319899	0.20134
B4galt1	0.199444	0	0.0426889	0.00967526	0.00125261	0.000581734	0.011623
B4galt2	0.0115271	0.0192296	0.0411375	0.0371325	0.0239017	0.0645276	0.1262
B4galt3	0.118836	0.0384521	0.058972	0.0648733	0.0589429	0.144926	0.186778
B4galt4	0.113111	0.0864308	0.215714	0.0517871	0.0153439	0.0975763	0.078377
B4galt5	0.0230527	0.00961524	0.0442402	0.0296461	0.00730682	0.0407101	0.184484
B4galt6	0.149301	0.134212	0.0953523	0.102815	0.0572756	0.232343	0.647642
B4galt7	0.0336152	0.0384521	0.0310509	0.0511637	0.0339183	0.0633665	0.141168
B4gat1	0.12837	0.247466	0.126988	0.265292	0.251414	0.310851	0.384339
B630019A10Rik	0.00192123	0	0.00155279	0.00624216	0.000626305	0.00116347	0.00325804
B630019K06Rik	0.133132	0.312211	0.169222	0.193546	0.166763	0.271801	0.803172
B830012L14Rik	0.00384245	0	0.0163036	0.00655426	0.000939457	0.019196	0.289008
B830042I05Rik	0	0	0.000776397	0	0.000104384	0	0.00440275
B930025P03Rik	0	0	0	0.00156055	0.000835073	0.000581734	0.00629591
B930036N10Rik	1.26787	0.312211	0.116198	0.0127962	0.00929005	0.0465219	0.121613
B930082K07Rik	0.00288184	0	0.014751	0.00187266	0.00615863	0.00116347	0.0199872
B930094E09Rik	0	0	0.00155279	0.00062422	0.00135699	0.00116347	0.00184916
B9d1	0.0259337	0.067257	0.0845266	0.112435	0.0827864	0.0285011	0.137418
B9d1os	0.000960615	0.00961524	0.00232919	0.000936329	0.00167015	0.0197777	0.0025536
B9d2	0.102606	0.11513	0.102306	0.0857252	0.0620687	0.0755535	0.211772
Baalc	0.072942	0.0960063	0.0736911	0.476741	0.0648814	0.197663	0.231365
Babam1	0.162587	0.153246	0.214956	0.129476	0.197359	0.160451	0.231794
Babam2	0.117882	0.143735	0.105395	0.0997099	0.172319	0.139743	0.121875
Bace1	0.0288145	0.0768474	0.10385	0.0723464	0.238342	0.131096	0.188119
Bace2	0.00192123	0.00961524	0.00621114	0.0131082	0.0742533	0.00523558	0.0214838
Bach1	0.0739001	0.0480584	0.065946	0.0124841	0.0291191	0.0232672	0.0302864
Bach2	0.026894	0.00961524	0.0279467	0.0249662	0.0308928	0.0575598	0.0561058
Bad	0.218244	0.275353	0.313178	0.223174	0.234687	0.226108	0.364812
Bag1	0.589634	0.402505	0.629876	0.39883	0.357964	0.362023	0.890064
Bag2	0.0134482	0.00961524	0.0395859	0.016229	0.0133608	0.030827	0.0700787
Bag3	0.05185	0.0864308	0.0876208	0.0496051	0.0506047	0.026175	0.0268536
Bag4	0.058564	0.105573	0.0550963	0.075459	0.0817461	0.0912057	0.26391
Bag5	0.087305	0.0960063	0.168457	0.0798154	0.0999379	0.117819	0.161799
Bag6	0.123604	0.0960063	0.176871	0.123902	0.148824	0.15068	0.201038
Bahcc1	0.009606	0.0192296	0.0232898	0.0106115	0.0195186	0.0378037	0.0408023
Bahd1	0.00864542	0.0288422	0.0209612	0.00998735	0.00876815	0.0145428	0.0373268
Baiap2	0.0470528	0.0480584	0.123906	0.0748365	0.02578	0.0883087	0.244294
Baiap2l1	0	0	0.0155273	0.00031211	0.000521921	0	0.00233346
Baiap2l2	0	0	0.00931664	0	0.000730689	0.0017452	0.00633994
Baiap3	0.072942	0.105573	0.099216	0.0835482	0.0566503	0.0923643	0.569399
Bak1	0.0777315	0.0576604	0.083753	0.0455523	0.0523769	0.103364	0.0446732
Bambi	0.0153692	0.0288422	0.079884	0.0255902	0.0161788	0.0360597	0.0312985
Banf1	0.187185	0.238128	0.328678	0.166828	0.21861	0.202226	0.252322
Banf2os	0	0	0.00155279	0.00031211	0.00271398	0.000581734	0.000704442
Bank1	0.0652754	0	0.000776397	0	0.000313152	0.000581734	0.00211333
Banp	0.0739001	0.0864308	0.0829793	0.0520988	0.0626938	0.0935227	0.137592
Bap1	0.0432142	0.0768474	0.0736911	0.0436815	0.044453	0.0610441	0.147703
Bard1	0.00480306	0.00961524	0.00155279	0.000936329	0.00281837	0.00698075	0.0143085
Barhl1	0	0	0	0.00031211	0.000208768	0	0.00250957
Barhl2	0.000960615	0	0.000776397	0.00124844	0.000626305	0	0.00541537
Barx2	0.00864542	0.0384521	0.0139747	0.0127962	0.0566503	0.0302455	0.080352
Basp1	1.83173	0.901625	0.857569	1.03131	0.656852	1.52343	1.92844
Batf	0.0240131	0	0.00621114	0	0.000104384	0	0.000176111
Batf3	0.134084	0	0	0.00062422	0.000521921	0.00116347	0.000880553
Bax	0.418952	0.293831	0.435625	0.365409	0.4289	0.596361	0.381962
Baz1a	0.124558	0.00961524	0.0248422	0.0034332	0.0026096	0.00465385	0.000792498
Baz1b	0.138843	0.21939	0.21799	0.118016	0.134562	0.107992	0.235907
Baz2a	0.0556869	0.0960063	0.0976707	0.0564619	0.0528981	0.0593021	0.118728
Baz2b	0.10165	0.124677	0.199756	0.123902	0.238241	0.102786	0.151361
BB031773	0	0	0.00155279	0	0.000104384	0	0.00435872
Bbc3	0.156896	0.00961524	0.0388101	0.00655426	0.0162832	0.0244304	0.0534241
Bbip1	0.171114	0.162742	0.206602	0.209146	0.287365	0.213613	0.219946
Bbof1	0.00768484	0.0192296	0.0116457	0.0318298	0.0154482	0.0174511	0.0649831
Bbox1	0.00480306	0	0.00854027	0.0605124	0.00501042	0.00465385	0.0059437
Bbs1	0.009606	0.00961524	0.012422	0.0165411	0.0136739	0.0139612	0.0608087
Bbs10	0.00288184	0	0.00931664	0.00561795	0.0038622	0.0127978	0.0209556
Bbs12	0.00480306	0	0.00621114	0.00499374	0.00177453	0.00349039	0.0203834
Bbs2	0.0240131	0.0576604	0.024066	0.030894	0.0242148	0.0139612	0.0702104
Bbs4	0.0278542	0.0960063	0.0450159	0.0474229	0.0433059	0.0662691	0.178811
Bbs5	0.0124877	0.0384521	0.0131984	0.0209098	0.0163876	0.0157062	0.0721867
Bbs7	0.0163297	0.00961524	0.0163036	0.0115478	0.0108557	0.0250119	0.0482356
Bbs9	0.117882	0.0192296	0.0163036	0.00873896	0.0153439	0.0116344	0.0413742
Bbx	0.0978266	0.067257	0.171518	0.0577083	0.173348	0.0761335	0.155364
BC002059	0.00864542	0.00961524	0.0131984	0.0134203	0.00929005	0.00872589	0.0231565
BC003331	0.0968705	0.0576604	0.0930334	0.0801265	0.0954708	0.1051	0.175993
BC003965	0.138843	0.124677	0.190614	0.151727	0.21759	0.178229	0.266418
BC004004	0.17206	0.105573	0.150825	0.152961	0.292372	0.193668	0.250018
BC005537	0.237903	0.303033	0.313918	0.218299	0.287265	0.277966	0.387982
BC005561	0.0853909	0.191142	0.137763	0.195384	0.177973	0.294726	0.228448
BC005624	0.276946	0.191142	0.24822	0.226826	0.393425	0.247608	0.375682
BC016548	0	0	0	0.00593005	0.00365344	0	0.000220138
[truncated: 15,039 more rows]

## Sheet: percent
	Microglia	VLMCs	Stromal	Astrocytes	Oligodendrocytes	OPCs	Neurons
0610005C13Rik	0	0.00961538	0.000776398	0.00873908	0.00146138	0	0.00678026
0610009B22Rik	0.14025	0.0961538	0.156832	0.136392	0.190919	0.154741	0.229428
0610009O20Rik	0.0528338	0.0673077	0.0815217	0.0546192	0.0872651	0.0663176	0.0728217
0610010F05Rik	0.0317003	0.00961538	0.0403727	0.0196629	0.0455115	0.0296684	0.141681
0610010K14Rik	0.245917	0.105769	0.176242	0.0864544	0.175678	0.0977312	0.189627
0610012G03Rik	0.340058	0.298077	0.322981	0.303995	0.365449	0.28854	0.575397
0610030E20Rik	0.107589	0.0865385	0.111025	0.0714732	0.108038	0.063409	0.146216
0610037L13Rik	0.130644	0.125	0.15295	0.0980025	0.161065	0.11751	0.169066
0610038B21Rik	0.00192123	0	0.0015528	0.00062422	0.000417537	0.000581734	0.00180513
0610039K10Rik	0.00960615	0	0.00465839	0.00062422	0.000417537	0.00116347	0.0012768
0610040B10Rik	0.0326609	0.0288462	0.0372671	0.0277778	0.051357	0.0308319	0.0900806
0610040F04Rik	0.00192123	0	0.00310559	0.00187266	0.000835073	0	0.0165544
0610040J01Rik	0.260327	0	0.00543478	0.00655431	0.00344468	0.0354857	0.00471096
0610043K17Rik	0.000960615	0	0.00621118	0.00530587	0.00104384	0.00116347	0.0103905
1010001B22Rik	0.00480307	0	0.0131988	0.0193508	0.023382	0.0110529	0.00656012
1110002L01Rik	0.0144092	0.00961538	0.0147516	0.0168539	0.0245303	0.0116347	0.0549905
1110002O04Rik	0	0	0	0.00062422	0.0039666	0	0.00167305
1110004E09Rik	0.0528338	0.0865385	0.102484	0.0571161	0.0893528	0.061082	0.136882
1110004F10Rik	0.337176	0.413462	0.44177	0.33583	0.456576	0.368819	0.509664
1110006O24Rik	0.000960615	0	0.00698758	0.00998752	0.0101253	0.00465387	0.00898164
1110008F13Rik	0.335255	0.201923	0.26087	0.229401	0.33048	0.216405	0.276582
1110008L16Rik	0.0163305	0	0.0481366	0.00717853	0.0102296	0.00814427	0.0293664
1110008P14Rik	0.225744	0.192308	0.261646	0.224719	0.295825	0.217568	0.493682
1110012L19Rik	0.0537944	0.0961538	0.0784161	0.0496255	0.0781837	0.0651542	0.107648
1110015O18Rik	0.00288184	0	0.00621118	0.00343321	0.00323591	0.0069808	0.0299828
1110017D15Rik	0.00480307	0.0192308	0.00931677	0.0109238	0.00720251	0.00930774	0.0791617
1110019D14Rik	0.0134486	0.0576923	0.00854037	0.0184145	0.0199374	0.008726	0.0174349
1110020A21Rik	0.00288184	0	0.0147516	0.00749064	0.0165971	0.00465387	0.00779289
1110032A03Rik	0.092219	0.115385	0.11646	0.0958177	0.194781	0.0866783	0.242945
1110032F04Rik	0.00480307	0.00961538	0.00854037	0.00593009	0.00615866	0.00407213	0.049311
1110034G24Rik	0.0605187	0.134615	0.123447	0.0521223	0.0654489	0.0471204	0.0806146
1110035H17Rik	0.0153698	0.0288462	0.0442547	0.00593009	0.00469729	0.0104712	0.0487386
1110038F14Rik	0.162344	0.163462	0.190994	0.115481	0.186221	0.146597	0.153216
1110046J04Rik	0.0182517	0.0865385	0.0496894	0.0224719	0.0693111	0.0238511	0.0925461
1110051M20Rik	0.0585975	0.0673077	0.0597826	0.0655431	0.111482	0.10413	0.24246
1110059E24Rik	0.0768492	0.0673077	0.11413	0.088015	0.11858	0.0732984	0.198212
1110059G10Rik	0.0931796	0.0673077	0.0954969	0.0611735	0.114927	0.069808	0.109321
1110065P20Rik	0.166186	0.259615	0.246118	0.166355	0.393006	0.18441	0.439704
1190002N15Rik	0.0268972	0.00961538	0.0318323	0.0268414	0.0720251	0.0279232	0.078017
1190005I06Rik	0.0278578	0.0288462	0.0473602	0.0814607	0.364301	0.0319953	0.0639281
1190007I07Rik	0.0682037	0.0576923	0.0559006	0.0546192	0.0709812	0.0593368	0.153789
1300002E11Rik	0.0336215	0.0192308	0.0706522	0.0318352	0.0727557	0.0331588	0.0486946
1300014J16Rik	0.0134486	0	0.000776398	0.00218477	0.000626305	0	0.00431471
1300017J02Rik	0.00192123	0	0.000776398	0.00031211	0.000626305	0.00116347	0.00114472
1500002C15Rik	0.00384246	0.0384615	0.00698758	0.00249688	0.00240084	0.0052356	0.0169506
1500009C09Rik	0.0989433	0.115385	0.0978261	0.196629	0.0863257	0.16114	0.451724
1500009L16Rik	0.0643612	0.153846	0.190217	0.0477528	0.05	0.0709715	0.290098
1500011B03Rik	0.143132	0.240385	0.166925	0.168227	0.292902	0.223386	0.733853
1500011K16Rik	0.268012	0.230769	0.247671	0.213795	0.299269	0.212333	0.348259
1500015A07Rik	0.0105668	0.0192308	0.0209627	0.0221598	0.0178497	0.00814427	0.0801303
1500015L24Rik	0	0	0.00232919	0.00031211	0.015762	0	0.000352221
1500035N22Rik	0.00288184	0	0.00388199	0.00249688	0.00281837	0.00116347	0.0235108
1520401A03Rik	0	0	0	0.00062422	0.000313152	0	0.00242152
1600002K03Rik	0.0403458	0.0192308	0.0326087	0.0277778	0.0290188	0.0354857	0.0747589
1600010M07Rik	0.0518732	0	0.00232919	0.00031211	0.000417537	0	0.000484304
1600012H06Rik	0.0345821	0.0288462	0.052795	0.0524345	0.0688935	0.0360675	0.0450843
1600014C10Rik	0.0682037	0.0288462	0.0496894	0.0177903	0.031524	0.0273415	0.141725
1600014C23Rik	0	0	0.000776398	0.0062422	0.000626305	0.00116347	0.00123277
1600020E01Rik	0.0441883	0.0480769	0.0807453	0.0490012	0.0665971	0.0413031	0.0950557
1700001C02Rik	0	0	0	0.0031211	0.000521921	0.000581734	0.00132083
1700001F09Rik	0	0	0.000776398	0	0.000417537	0.000581734	0.00325805
1700001L05Rik	0.00192123	0	0.000776398	0.00093633	0.000313152	0	0.00224541
1700001L19Rik	0.0441883	0.0192308	0.0419255	0.0421348	0.0416493	0.054683	0.225201
1700001O22Rik	0.00480307	0.0192308	0.00543478	0.00561798	0.00553236	0.0215241	0.0374235
1700003E16Rik	0.00480307	0	0.00621118	0.00468165	0.00480167	0.0052356	0.0497953
1700003F12Rik	0.0345821	0	0.00776398	0.0146692	0.00490605	0.00581734	0.0305992
1700003L19Rik	0	0	0	0	0	0.000581734	0.00220138
1700003M07Rik	0.000960615	0	0.000776398	0.00686642	0.00125261	0.000581734	0.00259763
1700007G11Rik	0.000960615	0	0.000776398	0.00093633	0.000626305	0	0.00387443
1700007K13Rik	0.00768492	0.0192308	0.0131988	0.0895755	0.0105428	0.0104712	0.035002
1700008J07Rik	0.0240154	0.0192308	0.0178571	0.0146692	0.0210856	0.0127981	0.0269009
1700008O03Rik	0.0105668	0	0.0108696	0.0093633	0.0146138	0.0139616	0.0810989
1700010I14Rik	0.0163305	0.00961538	0.00465839	0.00468165	0.0059499	0.00290867	0.0169506
1700011D18Rik	0	0	0.000776398	0.00062422	0.000835073	0.000581734	0.00356624
1700011I03Rik	0.00864553	0	0	0.00124844	0.00114823	0	0.00268569
1700012B09Rik	0.00384246	0.00961538	0.00388199	0.0031211	0.00417537	0.0017452	0.036631
1700012C14Rik	0.000960615	0	0.0015528	0.00218477	0.000730689	0.000581734	0.00647206
1700013F07Rik	0	0	0.000776398	0.00093633	0.000313152	0	0.00356624
1700015F17Rik	0.000960615	0	0.000776398	0	0.00135699	0.00116347	0.00422665
1700016D06Rik	0	0	0	0.00031211	0.000521921	0	0.00211333
1700016K19Rik	0.00288184	0	0.00465839	0.00374532	0.00344468	0.00116347	0.0345617
1700017B05Rik	0.211335	0	0.0225155	0.0271536	0.00501044	0.0127981	0.0169947
1700017N19Rik	0	0	0	0.00031211	0.000626305	0.000581734	0.00224541
1700018L02Rik	0.000960615	0.00961538	0.0108696	0.00249688	0.00427975	0.00290867	0.0118875
1700019D03Rik	0.00288184	0	0.00854037	0.031211	0.0504175	0.0477022	0.0661295
1700019L13Rik	0.00960615	0	0.0256211	0.00187266	0.00323591	0.00581734	0.0118875
1700020D05Rik	0.000960615	0	0.000776398	0.00280899	0.00250522	0	0.00316999
1700020I14Rik	0.113353	0.105769	0.220497	0.0886392	0.122547	0.0860966	0.212213
1700020L24Rik	0.0067243	0	0.00310559	0.00343321	0.0353862	0.00930774	0.00607582
1700021F05Rik	0.0931796	0.0769231	0.111025	0.0683521	0.0808977	0.0762071	0.177343
1700021N21Rik	0.000960615	0	0	0.00093633	0.00125261	0	0.00352221
1700023F06Rik	0.0201729	0.00961538	0.0310559	0.036829	0.0312109	0.0378127	0.198036
1700025G04Rik	0.0480307	0.0288462	0.0799689	0.0474407	0.13215	0.185573	0.263902
1700026J14Rik	0.00288184	0	0.00310559	0.00124844	0.00334029	0.00232693	0.00532735
1700027A07Rik	0	0	0.0015528	0.00062422	0.000417537	0	0.00457888
1700028J19Rik	0.00192123	0	0.00232919	0.00093633	0.00240084	0.00639907	0.00378638
1700028K03Rik	0	0.00961538	0.00388199	0.00093633	0.00219207	0	0.0140888
1700028P14Rik	0	0	0	0.00249688	0.000730689	0	0.00898164
1700029I15Rik	0.000960615	0.00961538	0.00543478	0.00717853	0.00219207	0.00465387	0.0137807
1700029J07Rik	0.00192123	0.0288462	0.00776398	0.036829	0.0177453	0.0116347	0.0379078
1700030C14Rik	0	0	0	0.00062422	0.000521921	0.0017452	0.00656012
1700030J22Rik	0.0067243	0.00961538	0.00931677	0.00405743	0.00375783	0.0017452	0.0308194
1700030K09Rik	0.0144092	0.0288462	0.0232919	0.0221598	0.017119	0.0221059	0.0452164
1700031P21Rik	0	0.00961538	0.00310559	0	0.000208768	0	0.00198124
1700034H15Rik	0.00192123	0	0.0015528	0.00031211	0.000626305	0.000581734	0.00616387
1700034I23Rik	0	0	0	0.00062422	0.000208768	0.000581734	0.00123277
1700034P13Rik	0	0	0	0.00031211	0.00250522	0.0017452	0.00136486
1700037C18Rik	0.024976	0.0288462	0.0240683	0.0184145	0.0465553	0.0180337	0.0643684
1700037H04Rik	0.0566763	0.0480769	0.0799689	0.0546192	0.0718163	0.0657359	0.309294
1700040D17Rik	0.000960615	0	0.0015528	0.00374532	0.00532359	0.0034904	0.00933386
1700041G16Rik	0.00864553	0.00961538	0.00621118	0.00468165	0.00240084	0.00465387	0.00545943
1700047I17Rik2	0	0	0	0.00062422	0.00532359	0.000581734	0.0020693
1700047M11Rik	0.0259366	0.0769231	0.0458075	0.0440075	0.471086	0.0942408	0.0259323
1700048O20Rik	0.00480307	0.0192308	0.0108696	0.00593009	0.00511482	0.0110529	0.0527892
1700052K11Rik	0.0182517	0.0384615	0.0232919	0.0093633	0.00887265	0.0110529	0.049311
1700054M17Rik	0	0	0	0	0.000104384	0	0.00224541
1700055D18Rik	0.012488	0.00961538	0.0015528	0.00280899	0.0026096	0.000581734	0.0102144
1700056E22Rik	0.00192123	0	0.00232919	0.00249688	0.00313152	0.0017452	0.00532735
1700056N10Rik	0.000960615	0.0192308	0.000776398	0.00031211	0.000730689	0.000581734	0.00290582
1700058P15Rik	0.0067243	0	0.000776398	0.00124844	0.000208768	0.000581734	0.00180513
1700060C20Rik	0	0	0	0.00031211	0.000104384	0	0.00132083
1700061G19Rik	0	0	0.000776398	0.00031211	0.000104384	0	0.00154097
1700063D05Rik	0.0240154	0.0673077	0.0225155	0.0168539	0.300731	0.0116347	0.0303351
1700064M15Rik	0.00192123	0	0.000776398	0.00187266	0.00104384	0.000581734	0.00607582
1700065D16Rik	0.00192123	0	0.0015528	0.00062422	0.00114823	0.00232693	0.00673623
1700066B17Rik	0.000960615	0	0	0	0.00334029	0	4.40276e-05
1700066B19Rik	0.0355427	0	0.00388199	0.00280899	0.00584551	0.00232693	0.0288821
1700066M21Rik	0.0153698	0.0288462	0.0201863	0.0268414	0.0597077	0.0407213	0.0600977
1700069B07Rik	0	0	0.000776398	0.00031211	0.0039666	0	0.0012768
1700084C06Rik	0.000960615	0	0	0.00031211	0.000521921	0	0.00180513
1700084E18Rik	0.00576369	0	0.00465839	0.0109238	0.00521921	0.00581734	0.00752873
1700086O06Rik	0.0115274	0	0.0217391	0.0205993	0.0181628	0.0139616	0.0715449
1700086P04Rik	0.00768492	0	0.000776398	0.00343321	0.00438413	0.0017452	0.0116673
1700088E04Rik	0.00864553	0.0288462	0.011646	0.0221598	0.0115866	0.008726	0.050984
1700093K21Rik	0.000960615	0	0.0015528	0.00031211	0.000104384	0.00232693	0.0154097
1700095J03Rik	0.000960615	0	0.00310559	0.00156055	0.000313152	0.00116347	0.00660415
1700096K18Rik	0.0345821	0.00961538	0.0217391	0.0365169	0.0699374	0.0401396	0.0409897
1700102H20Rik	0.00288184	0	0.0015528	0.00561798	0.00229645	0.0017452	0.00444679
1700102P08Rik	0.00192123	0.00961538	0.000776398	0.00124844	0.000626305	0.00116347	0.00479901
1700105P06Rik	0.000960615	0	0.00465839	0.0031211	0.00114823	0.00232693	0.01268
1700109H08Rik	0.00288184	0.00961538	0.00310559	0.00187266	0.000835073	0.000581734	0.00330207
1700112D23Rik	0.00576369	0	0.00388199	0.00343321	0.0065762	0.00290867	0.012768
1700112J16Rik	0.00480307	0	0.00465839	0.00468165	0.00501044	0.00581734	0.0304231
1700113A16Rik	0.0105668	0.0192308	0.0108696	0.0274657	0.0483299	0.00814427	0.020693
1700123J17Rik	0	0	0	0.00062422	0.000208768	0.0017452	0.0012768
1700123O20Rik	0.104707	0.0865385	0.0993789	0.0926966	0.143215	0.0907504	0.140184
1700124L16Rik	0.00768492	0	0.00776398	0.00593009	0.00626305	0.00814427	0.0801303
1700125G22Rik	0	0	0	0.00031211	0	0	0.00123277
1700125H20Rik	0.000960615	0	0.00232919	0.00093633	0.00104384	0	0.00506318
1810009A15Rik	0.0067243	0.0192308	0.0108696	0.00749064	0.0138831	0.0069808	0.0275613
1810010D01Rik	0	0	0.000776398	0.00062422	0.000521921	0.00116347	0.00118875
1810010H24Rik	0.0067243	0.0192308	0.011646	0.0240325	0.0125261	0.0535195	0.0606701
1810011H11Rik	0.0806916	0	0	0	0	0	0.000352221
1810013D15Rik	0	0	0.00232919	0.00717853	0.000521921	0.000581734	0.000572359
1810013L24Rik	0.126801	0.0384615	0.0799689	0.0683521	0.0599165	0.0319953	0.115617
1810019N24Rik	0.00192123	0	0	0	0.000208768	0	0.00396249
1810020O05Rik	0	0	0	0.00031211	0.000313152	0	0.00339013
1810021B22Rik	0.0192123	0.0384615	0.00854037	0.0168539	0.0135699	0.00581734	0.0173909
1810022K09Rik	0.179635	0.173077	0.181677	0.12578	0.196347	0.14078	0.29657
1810024B03Rik	0.0182517	0.0865385	0.0163043	0.0196629	0.0218163	0.0122164	0.00924581
1810030O07Rik	0.0537944	0.0384615	0.0465839	0.0234082	0.0449896	0.0343223	0.0898604
1810032O08Rik	0.0172911	0	0.0349379	0.0152934	0.0183716	0.0221059	0.0578083
1810037I17Rik	0.470701	0.471154	0.57764	0.467541	0.791858	0.382199	0.502796
1810041H14Rik	0.00576369	0	0.0015528	0.00187266	0.00302714	0.0017452	0.0119315
1810041L15Rik	0.0115274	0.00961538	0.0248447	0.0205993	0.00949896	0.175684	0.150839
1810043G02Rik	0.0931796	0.0384615	0.0892857	0.0689763	0.162735	0.0616638	0.238278
1810044D09Rik	0.0192123	0.00961538	0.011646	0.019975	0.0278706	0.00988947	0.0195483
1810055G02Rik	0.00576369	0.0384615	0.0279503	0.0274657	0.036952	0.0413031	0.0329327
1810058I24Rik	0.227666	0.336538	0.256211	0.142634	0.407411	0.151251	0.189979
1810062G17Rik	0.000960615	0	0.00388199	0.00156055	0.0091858	0	0.00171708
1810062O18Rik	0.00192123	0	0	0.00156055	0.00177453	0.0017452	0.0103025
2010005H15Rik	0.00192123	0	0.00310559	0.00031211	0.00156576	0.00116347	0.012768
2010007H06Rik	0.000960615	0.0384615	0.0170807	0.00655431	0.000208768	0	0.00250958
2010013B24Rik	0.0153698	0	0	0	0.000104384	0.000581734	0.00105666
2010015M23Rik	0.00288184	0.0192308	0.00621118	0.0106117	0.0091858	0.0116347	0.0371593
2010107E04Rik	0.586936	0.576923	0.629658	0.639513	0.648017	0.688191	0.709462
2010109A12Rik	0.012488	0.0288462	0.0217391	0.00780275	0.00521921	0.00639907	0.041474
2010111I01Rik	0.0326609	0.0865385	0.354037	0.0383895	0.155532	0.0511926	0.116541
2010300C02Rik	0.00576369	0.00961538	0.00388199	0.00655431	0.0065762	0.0133799	0.0645445
2010308F09Rik	0	0	0.000776398	0.00124844	0.000730689	0	0.00383041
2010315B03Rik	0.037464	0.0384615	0.0209627	0.0337079	0.0186848	0.017452	0.065293
2010320M18Rik	0.0422671	0.115385	0.0799689	0.0677278	0.0501044	0.0477022	0.106195
2200002D01Rik	0.00288184	0	0.0613354	0.00062422	0.00114823	0	0.00220138
2210008F06Rik	0.000960615	0	0.00465839	0.00218477	0.00417537	0.000581734	0.0202527
2210011C24Rik	0.0192123	0.0288462	0.0186335	0.0146692	0.035595	0.0244328	0.0330207
2210016F16Rik	0.211335	0.0769231	0.0830745	0.0468165	0.0575157	0.0657359	0.14921
2210016L21Rik	0.222863	0.317308	0.262422	0.261548	0.371816	0.287958	0.553472
2210406O10Rik	0.00384246	0	0.00698758	0.0062422	0.0121086	0.00930774	0.0377757
2210408I21Rik	0.0067243	0.00961538	0.0131988	0.0124844	0.0222338	0.0145433	0.0496192
2300009A05Rik	0.0826129	0.0480769	0.139752	0.109238	0.134447	0.0977312	0.238938
2310001H17Rik	0.0134486	0.0192308	0.0279503	0.00124844	0.000939457	0.000581734	0.0134725
2310003N18Rik	0.00192123	0	0.0015528	0.00062422	0.000104384	0	0.00330207
2310009B15Rik	0.0883766	0.144231	0.0986025	0.0992509	0.0870564	0.0849331	0.28345
2310011J03Rik	0.133525	0.134615	0.13587	0.0745943	0.229958	0.0552647	0.10549
2310016G11Rik	0	0	0	0.00280899	0.00313152	0.000581734	0.000132083
2310022A10Rik	0.0220941	0.0288462	0.0543478	0.0252809	0.0373695	0.0250145	0.104037
2310022B05Rik	0.0768492	0.0865385	0.231366	0.38171	0.292484	0.0599186	0.0457447
2310026L22Rik	0	0	0	0.00031211	0.000104384	0	0.00123277
2310030G06Rik	0.000960615	0	0.0225155	0.00124844	0.00229645	0.00232693	0.0210892
2310033P09Rik	0.174832	0.163462	0.154503	0.065231	0.120668	0.0692263	0.20398
2310034G01Rik	0.0067243	0.00961538	0.00776398	0.00717853	0.0111691	0.00465387	0.0269449
2310034O05Rik	0.00192123	0	0.000776398	0.00093633	0.000521921	0	0.00391846
2310035C23Rik	0.0710855	0.0961538	0.0877329	0.0752185	0.118372	0.0913322	0.243121
2310039H08Rik	0.0451489	0.163462	0.120342	0.056804	0.0868476	0.0325771	0.0988861
2310040G07Rik	0.00288184	0	0.0170807	0.0174782	0.000730689	0.00581734	0.0108748
2310040G24Rik	0.079731	0.00961538	0.0201863	0.0118602	0.0105428	0.0116347	0.0394047
2310047D07Rik	0.00864553	0	0.000776398	0.00218477	0.00208768	0.00290867	0.00616387
2310057M21Rik	0.0230548	0.0576923	0.0450311	0.0308989	0.0484342	0.0285049	0.116585
2310061I04Rik	0.0595581	0.0673077	0.100155	0.0886392	0.0863257	0.0762071	0.239422
2310068J16Rik	0.0105668	0.00961538	0.00776398	0.0127965	0.018476	0.00290867	0.0280016
2310074N15Rik	0.00288184	0.0192308	0.011646	0.0093633	0.0107516	0.00930774	0.0332409
2310075C17Rik	0.000960615	0	0	0	0	0	0.00202527
2410002F23Rik	0.0931796	0.0769231	0.0621118	0.0611735	0.0987474	0.107039	0.194866
2410004B18Rik	0.113353	0.0961538	0.11646	0.112672	0.251566	0.10064	0.22256
2410004I01Rik	0.00288184	0	0.000776398	0.00187266	0.00177453	0.00407213	0.0191961
2410004P03Rik	0	0	0.000776398	0.00499376	0.000939457	0.000581734	0.00823317
2410015M20Rik	0.472622	0.480769	0.475155	0.484082	0.559499	0.586387	0.767578
2410018L13Rik	0.00480307	0	0.00465839	0.00593009	0.0045929	0.00290867	0.0468454
2410080I02Rik	0.012488	0.105769	0.0465839	0.0140449	0.0111691	0.0122164	0.0181834
2410089E03Rik	0.0336215	0.0576923	0.068323	0.071161	0.0539666	0.0628272	0.260732
2410131K14Rik	0.037464	0.0480769	0.0310559	0.0355805	0.038309	0.0232693	0.128737
2510002D24Rik	0.0816523	0.0576923	0.125	0.0848939	0.060334	0.0762071	0.240215
2510009E07Rik	0.0470701	0.0192308	0.0729814	0.0330836	0.0908142	0.0453752	0.106591
2510017J16Rik	0.00288184	0	0.0108696	0.00124844	0.00417537	0.00407213	0.0131643
2510039O18Rik	0.106628	0.0384615	0.068323	0.0234082	0.0728601	0.0413031	0.0755074
2510046G10Rik	0.00768492	0.0384615	0.0450311	0.00873908	0.0188935	0.0104712	0.0253159
2600006K01Rik	0.00192123	0	0.00698758	0.00686642	0.00407098	0.00581734	0.0381279
2600014E21Rik	0.00192123	0	0.0015528	0.00093633	0.000521921	0.0145433	0.011095
2610001J05Rik	0.310279	0.336538	0.319876	0.23377	0.474217	0.311227	0.339057
2610002M06Rik	0.0268972	0.0192308	0.0481366	0.0243446	0.0390397	0.034904	0.148021
2610008E11Rik	0.012488	0.0384615	0.0341615	0.03402	0.0389353	0.0407213	0.0619469
2610020C07Rik	0.00384246	0	0.00931677	0.00655431	0.00678497	0.00465387	0.0213094
2610021A01Rik	0.012488	0.00961538	0.00776398	0.0124844	0.0162839	0.0162885	0.0328446
2610027F03Rik	0	0	0.00232919	0.00374532	0.000521921	0.000581734	0.00519526
2610028E06Rik	0.00288184	0	0.00465839	0.00343321	0.00177453	0.00290867	0.0300709
2610035D17Rik	0.0441883	0.0192308	0.0621118	0.0633583	0.091023	0.0791158	0.128164
2610037D02Rik	0.0605187	0.0288462	0.0295031	0.0408864	0.0304802	0.0197789	0.0862502
2610042L04Rik	0.00384246	0.00961538	0.00388199	0.00031211	0.000835073	0.00116347	0.0109629
2610044O15Rik8	0.0211335	0	0.0302795	0.0237203	0.0283925	0.026178	0.079646
2610301B20Rik	0.0278578	0.0576923	0.0473602	0.0543071	0.0579332	0.0552647	0.168362
2610318N02Rik	0.00192123	0	0.000776398	0.00093633	0.000313152	0.000581734	0.00889359
2610507B11Rik	0.0854947	0.0480769	0.111801	0.108302	0.115762	0.0639907	0.226082
2610524H06Rik	0.0384246	0.0288462	0.0551242	0.0558677	0.0854906	0.0971495	0.235636
2610528A11Rik	0.074928	0	0.000776398	0.00031211	0.000417537	0	0.00105666
2700012I20Rik	0.00576369	0	0.00465839	0.00187266	0.00688935	0.00290867	0.00264166
2700016F22Rik	0.00768492	0.00961538	0.00232919	0.00499376	0.00511482	0.00407213	0.0108748
2700033N17Rik	0.00288184	0.00961538	0.00854037	0.00374532	0.0059499	0.00290867	0.0232466
2700038G22Rik	0.0422671	0	0.0178571	0.0106117	0.017119	0.0133799	0.0492229
2700046A07Rik	0.00480307	0.0961538	0.0427019	0.00749064	0.156994	0.00232693	0.00708845
2700046G09Rik	0.0105668	0	0.0170807	0.0252809	0.0424843	0.0110529	0.0491349
2700049A03Rik	0.0182517	0	0.0271739	0.0140449	0.0153445	0.0162885	0.0403293
2700062C07Rik	0.0489914	0.0576923	0.0520186	0.0355805	0.0840292	0.0418848	0.120151
2700069I18Rik	0	0.00961538	0.000776398	0.00156055	0.00187891	0.00116347	0.0280456
2700081O15Rik	0.0105668	0.0192308	0.0279503	0.0271536	0.00793319	0.0238511	0.0475499
2700097O09Rik	0.0365034	0.0480769	0.0535714	0.065231	0.093737	0.0663176	0.149034
2810001G20Rik	0.0451489	0.0384615	0.0675466	0.0708489	0.059499	0.0622455	0.193193
2810004N23Rik	0.145053	0.0961538	0.118012	0.116417	0.205428	0.129145	0.22278
2810006K23Rik	0.0432277	0.0769231	0.0582298	0.0324594	0.0457203	0.0407213	0.0821556
2810021J22Rik	0.0172911	0.00961538	0.0186335	0.00873908	0.0111691	0.0122164	0.0360146
2810032G03Rik	0.00384246	0.00961538	0.00465839	0.00530587	0.0039666	0.0034904	0.0446881
2810049E08Rik	0.000960615	0	0.00388199	0.00749064	0.00334029	0.00232693	0.0173029
2810402E24Rik	0.0806916	0.0384615	0.0636646	0.0293383	0.0382046	0.0447935	0.0644565
2810403A07Rik	0.0566763	0.0673077	0.0784161	0.104557	0.0504175	0.054683	0.147052
2810405F17Rik	0.0230548	0.0192308	0.0139752	0.0149813	0.00824635	0.0052356	0.0289262
2810408A11Rik	0.000960615	0	0.00232919	0.00124844	0.00125261	0.00116347	0.000660415
2810414N06Rik	0.00288184	0.00961538	0.00388199	0.00218477	0.015762	0.00290867	0.0133844
2810425M01Rik	0.00192123	0	0	0.00156055	0.000521921	0.00116347	0.00250958
2810429I04Rik	0.00480307	0	0.00698758	0.0031211	0.0611691	0.00465387	0.0246995
2810454H06Rik	0.0480307	0.0769231	0.0815217	0.0118602	0.0176409	0.0366492	0.0814071
2810455O05Rik	0.00480307	0	0	0.00093633	0.00490605	0.00232693	0.0124158
2810457G06Rik	0.00192123	0.0192308	0.011646	0.00842697	0.00427975	0.00581734	0.0181834
2810459M11Rik	0.00288184	0	0.00310559	0.0358926	0.00375783	0.0221059	0.0147052
2810474O19Rik	0.122959	0.125	0.0916149	0.045568	0.0558455	0.0447935	0.101836
2900009J06Rik	0.00768492	0.0192308	0.015528	0.00686642	0.00584551	0.00581734	0.0315238
2900011O08Rik	0.126801	0.153846	0.13354	0.153246	0.151775	0.226876	0.552679
2900026A02Rik	0.00864553	0	0.159161	0.0115481	0.00782881	0.0034904	0.0566636
2900045O20Rik	0.000960615	0	0.00232919	0.0031211	0.00146138	0.00232693	0.0145291
2900052N01Rik	0.012488	0.00961538	0.0131988	0.117665	0.0150313	0.0104712	0.0166865
2900055J20Rik	0.00768492	0.0384615	0.0186335	0.00436954	0.0478079	0.0238511	0.152027
2900060B14Rik	0.127762	0.0673077	0.0582298	0.00998752	0.00897704	0.0267597	0.0991503
2900072N19Rik	0	0	0.0015528	0	0.000208768	0.000581734	0.00299388
2900076A07Rik	0.0134486	0.0288462	0.0318323	0.0446317	0.0496868	0.0279232	0.0936028
2900079G21Rik	0.00960615	0.00961538	0.00543478	0.0062422	0.00542797	0.0162885	0.0613305
2900089D17Rik	0.00864553	0	0.0108696	0.00561798	0.00417537	0.00290867	0.00660415
2900093K20Rik	0.0192123	0.0769231	0.0450311	0.0514981	0.0568894	0.0296684	0.119623
2900097C17Rik	0.251681	0.278846	0.278727	0.254057	0.264196	0.197789	0.718883
3010003L21Rik	0.00384246	0	0.011646	0.00062422	0.00845511	0.00116347	0.00167305
3100002H09Rik	0	0	0	0.00124844	0.00281837	0.0215241	0.00440276
3100003L05Rik	0	0	0	0	0.000208768	0	0.00246555
3110001I22Rik	0.00576369	0	0.00931677	0.00436954	0.00407098	0.00290867	0.00730859
3110002H16Rik	0.024976	0.0384615	0.0302795	0.0221598	0.0246347	0.0145433	0.0415621
3110006O06Rik	0.000960615	0	0	0.00031211	0.000208768	0.000581734	0.00264166
3110009E18Rik	0.0201729	0.0288462	0.0178571	0.0140449	0.0280793	0.0215241	0.031876
3110021N24Rik	0.00576369	0.0480769	0.0310559	0.0377653	0.0838205	0.0395579	0.142165
3110035E14Rik	0.00960615	0.00961538	0.00931677	0.0187266	0.00866388	0.272251	0.0274292
3110040N11Rik	0.0336215	0.0384615	0.0504658	0.0230961	0.043737	0.0267597	0.132303
3110043O21Rik	0.0441883	0.0384615	0.0341615	0.0196629	0.0366388	0.0308319	0.0929864
3110045C21Rik	0.000960615	0	0.00310559	0.00468165	0.0112735	0.00232693	0.0109189
3110062M04Rik	0.0518732	0.0480769	0.0900621	0.0268414	0.0391441	0.0279232	0.0619029
3110070M22Rik	0.00576369	0	0.0194099	0.00468165	0.00751566	0.00407213	0.0131202
3110079O15Rik	0.000960615	0	0	0.00124844	0.000521921	0.00232693	0.00391846
3110082I17Rik	0.0297791	0.0384615	0.0395963	0.0193508	0.0189979	0.0110529	0.0656452
3110082J24Rik	0.0182517	0.0192308	0.0131988	0.0895755	0.100731	0.00988947	0.0125919
3110099E03Rik	0	0	0	0.00031211	0.000104384	0.000581734	0.00114472
3222401L13Rik	0.0778098	0.105769	0.0885093	0.0783396	0.0798539	0.0488656	0.0651169
3300002I08Rik	0.00288184	0.0192308	0.0015528	0.00593009	0.0100209	0.00639907	0.0115793
3300002P13Rik	0	0	0	0.00062422	0.000313152	0	0.00198124
3632451O06Rik	0.0144092	0.0192308	0.0295031	0.0218477	0.0245303	0.302501	0.155506
3830406C13Rik	0.0720461	0.125	0.128106	0.102372	0.133507	0.0727167	0.19786
3930402G23Rik	0	0	0.00465839	0.00093633	0.000521921	0	0.00171708
4430402I18Rik	0.00960615	0.00961538	0.068323	0.0433833	0.00960334	0.293194	0.17796
4631405J19Rik	0	0	0.00776398	0.00124844	0.000313152	0	0.00211333
4632404H12Rik	0.00864553	0	0.0108696	0.0093633	0.0131524	0.00930774	0.0353102
4632411P08Rik	0	0.00961538	0.000776398	0.00218477	0.00187891	0.000581734	0.00858539
4632415L05Rik	0.0518732	0.0769231	0.0698758	0.0717853	0.0674322	0.0575916	0.154185
4632428C04Rik	0.00288184	0	0.0015528	0.00280899	0.00135699	0.00116347	0.0103025
4732414G09Rik	0.00192123	0.00961538	0.00310559	0.00780275	0.00407098	0.00581734	0.0314357
4732419C18Rik	0.000960615	0	0	0	0.00229645	0.000581734	0.00594373
4732440D04Rik	0.00480307	0.00961538	0.0124224	0.0205993	0.00897704	0.00581734	0.0471096
4732463B04Rik	0.000960615	0	0.000776398	0	0.000208768	0.0017452	0.0199445
4732471J01Rik	0.0192123	0	0.00698758	0.00436954	0.00876827	0.00407213	0.03192
4732491K20Rik	0.012488	0.0288462	0.0139752	0.0265293	0.0219207	0.0157068	0.0793378
4732496C06Rik	0.00192123	0.00961538	0.00931677	0.00405743	0.0065762	0.0052356	0.0486506
4831440D22Rik	0	0	0	0.00062422	0.00114823	0.000581734	0.00277374
4831440E17Rik	0.00192123	0	0.00310559	0.0106117	0.00271399	0.00116347	0.0110069
4833412C05Rik	0.000960615	0	0.00232919	0	0.000730689	0	0.00233347
4833413G10Rik	0.000960615	0.0192308	0.0015528	0.00280899	0.00553236	0.00116347	0.00497512
4833418N02Rik	0.0201729	0	0.00931677	0.00124844	0.00302714	0.00232693	0.00400652
4833420G17Rik	0.0816523	0.0576923	0.0807453	0.0930087	0.0925887	0.080861	0.137322
4833422C13Rik	0.00480307	0	0.0240683	0.0165418	0.00417537	0.00407213	0.0329327
4833427G06Rik	0	0	0.00232919	0	0.000104384	0	0.00176111
4833439L19Rik	0.138329	0.153846	0.189441	0.112672	0.284238	0.101803	0.214415
4833445I07Rik	0.176753	0	0.00388199	0.00218477	0.00146138	0.00232693	0.0195042
4921504A21Rik	0.00192123	0.00961538	0.0015528	0.0102996	0.0257829	0.00581734	0.0314357
4921507P07Rik	0	0.00961538	0.00388199	0.00031211	0.000730689	0.00116347	0.00871747
4921516A02Rik	0.000960615	0	0	0	0.00114823	0.00116347	0.00369832
4921524J17Rik	0.079731	0.134615	0.159938	0.0536829	0.0709812	0.0756254	0.141549
4922502N22Rik	0.000960615	0	0	0.00093633	0.000626305	0.0133799	0.000572359
4930402H24Rik	0.0614793	0.144231	0.125	0.333645	0.306576	0.102385	0.236913
4930403P22Rik	0.00480307	0	0.00543478	0.00405743	0.0026096	0.00407213	0.0133404
4930404N11Rik	0.00576369	0	0.00465839	0.00062422	0.000939457	0.00290867	0.0120195
4930408O17Rik	0.000960615	0	0	0	0.00292276	0	0.00149694
4930412M03Rik	0	0	0.000776398	0.00093633	0.00146138	0	0.000968608
4930413F20Rik	0	0	0.000776398	0.00062422	0.000104384	0.00290867	0.0123277
4930426D05Rik	0.00480307	0.0192308	0.00854037	0.00561798	0.00521921	0.00407213	0.0449082
4930426I24Rik	0.00288184	0.0192308	0.0100932	0.0062422	0.00699374	0.00232693	0.00418263
4930426L09Rik	0.00480307	0	0.00310559	0.00093633	0.00521921	0.000581734	0.00184916
4930430F08Rik	0.0297791	0.00961538	0.0419255	0.0502497	0.0780793	0.0383944	0.0853256
4930432K21Rik	0.000960615	0.00961538	0.00388199	0.00156055	0.00375783	0.00116347	0.0090697
4930434B07Rik	0	0	0	0	0	0	0.00149694
4930444M15Rik	0.000960615	0	0.00543478	0.00031211	0.000417537	0.0104712	0.0189759
4930444P10Rik	0.00192123	0	0	0.00124844	0.00187891	0.00465387	0.014397
4930447C04Rik	0.00192123	0.0192308	0.0108696	0.00374532	0.00250522	0.00639907	0.109849
4930451I11Rik	0	0	0	0	0.000313152	0.000581734	0.00281777
4930452B06Rik	0.00384246	0	0.00776398	0.00468165	0.00334029	0.00232693	0.0290142
4930452G13Rik	0	0	0.0015528	0	0.0108559	0.00756254	0.00330207
4930453N24Rik	0.0365034	0.0480769	0.048913	0.0296504	0.0610647	0.0308319	0.0676265
4930455G09Rik	0.00480307	0	0.00388199	0.00124844	0.0181628	0	0.00818914
4930458D05Rik	0.00192123	0.00961538	0.00232919	0.00187266	0.000626305	0.000581734	0.0114032
4930461C15Rik	0	0.00961538	0	0.00093633	0.00271399	0.000581734	0.00272971
4930480K23Rik	0.00288184	0	0.00388199	0.00343321	0.00313152	0.00465387	0.00616387
4930481A15Rik	0.0422671	0.0192308	0.0388199	0.0299625	0.0474948	0.0116347	0.0263285
4930484H19Rik	0	0	0	0.00062422	0.000104384	0	0.00198124
4930488L21Rik	0.000960615	0	0.000776398	0.00468165	0.00782881	0.00232693	0.01585
4930500F10Rik	0	0	0.0015528	0	0.00125261	0	0.007969
4930500L23Rik	0.00288184	0.00961538	0.00310559	0.00499376	0.0026096	0.0034904	0.0364109
4930500M09Rik	0	0	0.0015528	0.00031211	0.000208768	0	0.00211333
4930502E18Rik	0.000960615	0	0.000776398	0.00062422	0.000521921	0	0.00422665
4930503L19Rik	0.00768492	0.00961538	0.0465839	0.0115481	0.0188935	0.017452	0.0273852
4930507D05Rik	0.00192123	0	0.0015528	0.00093633	0.000835073	0.00232693	0.00973011
4930509G22Rik	0.00192123	0	0.0015528	0.00156055	0.000626305	0.000581734	0.00515123
4930513N10Rik	0.00288184	0.00961538	0.0108696	0.00031211	0.000521921	0	0.0106547
4930515G01Rik	0.000960615	0	0.00465839	0	0.00156576	0.00232693	0.00572359
4930518I15Rik	0.00768492	0	0.0108696	0.0165418	0.00574113	0.0069808	0.0291903
4930519A11Rik	0.000960615	0	0	0	0.000313152	0	0.00343416
4930522L14Rik	0.00768492	0.00961538	0.0147516	0.00530587	0.0170146	0.0122164	0.0136486
4930523C07Rik	0.0192123	0.0576923	0.462733	0.0246567	0.00313152	0.00988947	0.00427068
4930524B15Rik	0.00192123	0	0.0015528	0.00093633	0.000521921	0	0.00603179
4930524J08Rik	0.00480307	0	0.00465839	0.00717853	0.00678497	0.00232693	0.0162462
4930524O07Rik	0.00384246	0	0	0.00249688	0.000835073	0.000581734	0.00383041
4930525G20Rik	0	0	0.000776398	0.00093633	0.000521921	0.000581734	0.0033461
4930528G23Rik	0	0	0	0	0	0	0.001585
4930532G15Rik	0.0211335	0.0480769	0.0512422	0.00717853	0.00626305	0.04363	0.109321
4930537H20Rik	0.0172911	0	0.0015528	0.00062422	0.000417537	0.0034904	0.00594373
4930539E08Rik	0.00192123	0.00961538	0.0015528	0.00031211	0.000939457	0.000581734	0.0199886
4930539J05Rik	0.0317003	0	0.00854037	0.00561798	0.0153445	0.00814427	0.0210452
4930540M05Rik	0	0	0	0.00031211	0.000208768	0	0.00132083
4930544F09Rik	0	0	0	0.00031211	0.000417537	0	0.00396249
4930548H24Rik	0	0	0.0015528	0.00062422	0	0.00290867	0.00215735
4930550C14Rik	0.000960615	0	0.00310559	0.00405743	0.00375783	0.00116347	0.00118875
4930553P18Rik	0.00384246	0	0.00310559	0.00343321	0.0039666	0.00290867	0.0209131
4930555F03Rik	0	0	0	0	0.000313152	0.00116347	0.00228944
4930558K02Rik	0.00288184	0	0.00232919	0.00062422	0.000939457	0.00639907	0.00999428
4930565N06Rik	0	0	0	0.00062422	0.000521921	0.00116347	0.000924581
4930568G15Rik	0.000960615	0	0	0.00031211	0.000104384	0	0.00453485
4930570G19Rik	0.00960615	0.00961538	0.00621118	0.0202871	0.015762	0.017452	0.07969
4930572G02Rik	0.00192123	0	0	0.00093633	0.0039666	0.000581734	0.00237749
4930579G24Rik	0.00384246	0.0288462	0.0131988	0.00468165	0.0294363	0.00814427	0.00977414
4930589L23Rik	0.00288184	0	0.00232919	0.00124844	0.000939457	0.0034904	0.0054154
4930590J08Rik	0	0	0.00621118	0.00156055	0.00167015	0.00290867	0.0132964
4930592C13Rik	0	0	0	0.00031211	0.000521921	0	0.00272971
4930593C16Rik	0	0	0.000776398	0	0.000835073	0	0.00422665
4930594M22Rik	0	0.0288462	0.000776398	0.00156055	0.000208768	0	0.00118875
4930598A11Rik	0	0	0.000776398	0	0	0	0.00180513
4931406C07Rik	0.079731	0.0480769	0.052795	0.0583645	0.0751566	0.0424666	0.0657773
4931406P16Rik	0.0480307	0.0865385	0.235248	0.0549313	0.234029	0.0732984	0.105446
4931414P19Rik	0.00480307	0	0.0139752	0.00780275	0.00521921	0.00988947	0.0103465
4931423N10Rik	0	0	0	0	0.000104384	0	0.00136486
4931428F04Rik	0.00960615	0.0192308	0.0124224	0.0127965	0.0131524	0.0244328	0.0996786
4931440F15Rik	0.00192123	0	0.0015528	0.00405743	0.00208768	0.00290867	0.0228504
4931440J10Rik	0.000960615	0	0.000776398	0	0.000104384	0.000581734	0.000968608
4932422M17Rik	0.0192123	0.00961538	0.015528	0.00499376	0.00615866	0.00756254	0.0348699
4932435O22Rik	0	0	0.00310559	0	0.00448852	0.000581734	0.00189319
4932438A13Rik	0.0576369	0.115385	0.100155	0.0683521	0.100418	0.080861	0.30969
4932438H23Rik	0.00288184	0	0.00543478	0.0330836	0.00542797	0.0017452	0.0049311
4932443I19Rik	0.00192123	0	0.00232919	0.0259051	0.00281837	0.0034904	0.015938
4932443L11Rik	0.000960615	0	0.000776398	0.00062422	0.000417537	0.00232693	0.0020693
4932702P03Rik	0	0	0.00232919	0.00031211	0.000208768	0	0.00268569
4933402D24Rik	0.000960615	0	0	0	0.000104384	0	0.00184916
4933404O12Rik	0.00384246	0.00961538	0.00621118	0.0062422	0.0106472	0.00930774	0.0373354
4933405L10Rik	0.000960615	0	0	0.00249688	0.000835073	0	0.00378638
4933406C10Rik	0.00384246	0	0.0015528	0.0031211	0.00605428	0.00290867	0.0130762
4933406I18Rik	0.00576369	0	0	0.00031211	0.000417537	0.00232693	0.00946594
4933406P04Rik	0.00768492	0.0192308	0.00698758	0.00093633	0.0019833	0.000581734	0.00788095
4933407L21Rik	0.00576369	0.0192308	0.00854037	0.0243446	0.00553236	0.0116347	0.0336371
4933408B17Rik	0.000960615	0.0192308	0.00388199	0.00405743	0.00104384	0.00465387	0.017567
4933408J17Rik	0	0	0.000776398	0	0	0	0.00171708
4933412O06Rik	0	0	0	0.00031211	0.000417537	0.00232693	0.0136486
4933415A04Rik	0.000960615	0	0.0015528	0.0031211	0.0065762	0.00407213	0.00118875
4933417D19Rik	0	0	0	0.00093633	0.00156576	0.0017452	0.00233347
4933424G06Rik	0.00192123	0.00961538	0	0.00124844	0.000730689	0.0034904	0.0133404
4933427D14Rik	0.0163305	0.00961538	0.0232919	0.0190387	0.0189979	0.0110529	0.0763439
4933427E11Rik	0	0	0.000776398	0.00031211	0.000313152	0.00116347	0.00074847
4933428P19Rik	0.00192123	0.00961538	0.00232919	0.00093633	0.000208768	0.00290867	0.00884956
4933429H19Rik	0	0.00961538	0.00388199	0.00124844	0.00135699	0.0034904	0.0033461
4933431E20Rik	0.0230548	0.0576923	0.0450311	0.085206	0.213152	0.0494474	0.107824
4933433G15Rik	0.0595581	0	0.00232919	0.00124844	0.000835073	0.0017452	0.00427068
4933434E20Rik	0.184438	0.211538	0.153727	0.152934	0.301148	0.16114	0.334082
5031425E22Rik	0.246878	0.134615	0.149845	0.110175	0.0693111	0.0447935	0.162946
5031425F14Rik	0.00576369	0	0.00621118	0.0062422	0.00469729	0.0052356	0.0447321
5031439G07Rik	0.144092	0.0961538	0.121118	0.418851	0.419415	0.0750436	0.170343
5033403F01Rik	0.000960615	0	0.000776398	0.00093633	0.00177453	0.00116347	0.00537137
5033406O09Rik	0.00192123	0.00961538	0.00931677	0.00280899	0.013048	0.000581734	0.0226302
5033417F24Rik	0.00288184	0.00961538	0.00465839	0.00499376	0.00647182	0.00116347	0.0213974
5033421B08Rik	0.00192123	0	0.000776398	0	0.00542797	0	0.000352221
5033426O07Rik	0.0105668	0.00961538	0.00388199	0.0115481	0.0026096	0.179174	0.00435874
5033430I15Rik	0.0182517	0.00961538	0.0194099	0.0124844	0.0109603	0.0116347	0.0815832
5330413P13Rik	0.000960615	0	0.0015528	0.00031211	0.0019833	0.000581734	0.0113591
5330416C01Rik	0	0	0.000776398	0	0.000104384	0.0052356	0.00224541
5330417C22Rik	0.00384246	0.00961538	0.00388199	0.00343321	0.00302714	0.00639907	0.148857
5330434G04Rik	0.012488	0.0192308	0.0318323	0.0187266	0.0494781	0.0511926	0.339717
5330439A09Rik	0	0	0	0.00062422	0.000208768	0	0.00167305
5430402O13Rik	0	0	0.00310559	0.00280899	0.00448852	0.00232693	0.00484304
5430403G16Rik	0.0067243	0	0.0108696	0.00468165	0.00563674	0.0122164	0.0110069
5430416N02Rik	0.0153698	0.0192308	0.0163043	0.0102996	0.0262004	0.0145433	0.052481
5430421F17Rik	0	0.00961538	0.000776398	0	0.000104384	0	0.000924581
5430427N15Rik	0	0	0	0.00405743	0.000939457	0	0.000264166
5430431A17Rik	0.00192123	0	0.000776398	0.00187266	0.00876827	0.00465387	0.00686831
5530401A14Rik	0	0.00961538	0.000776398	0.00031211	0	0	0.00501915
5730403I07Rik	0.000960615	0.00961538	0.0015528	0	0.0224426	0	0.00250958
5730409E04Rik	0.0480307	0.0384615	0.0582298	0.0430712	0.0546973	0.0337405	0.151455
5730422E09Rik	0.00192123	0	0	0.00124844	0.000313152	0	0.00501915
5730455P16Rik	0.0451489	0.0576923	0.0512422	0.0564919	0.0839248	0.0529378	0.194514
5730480H06Rik	0.0297791	0.0480769	0.0333851	0.0358926	0.0407098	0.026178	0.0673623
5730507C01Rik	0.000960615	0.00961538	0.000776398	0.00031211	0.000730689	0.00116347	0.00453485
5730522E02Rik	0.00192123	0	0	0.00093633	0.000104384	0.00232693	0.00849734
5730559C18Rik	0.000960615	0	0.00388199	0.00530587	0.0026096	0.0860966	0.00475499
5830418P13Rik	0	0	0	0	0	0	0.00211333
5830454E08Rik	0.00480307	0.00961538	0.0248447	0.0149813	0.0151357	0.0110529	0.0426188
5830473C10Rik	0	0	0	0.00031211	0	0	0.00105666
5930412G12Rik	0.00384246	0	0.0186335	0.0224719	0.00313152	0.00290867	0.00519526
5930422O12Rik	0	0	0	0.00062422	0.000417537	0.00116347	0.0046229
5930430L01Rik	0.00864553	0.0769231	0.0465839	0.0730337	0.0143006	0.0232693	0.0575882
6030407O03Rik	0.00192123	0	0	0.00093633	0.0286013	0.00232693	0.00228944
6030408B16Rik	0	0	0.000776398	0.00062422	0.000730689	0.00116347	0.00268569
6030419C18Rik	0.0259366	0.0288462	0.0302795	0.0377653	0.025261	0.0529378	0.189187
6030443J06Rik	0.00192123	0.00961538	0.000776398	0.00655431	0.00448852	0.0104712	0.00854136
6030445D17Rik	0	0	0.00776398	0.00093633	0.000521921	0.000581734	0.00475499
6030458C11Rik	0.0259366	0.0576923	0.0271739	0.0490012	0.0351775	0.0453752	0.129177
6230400D17Rik	0.00384246	0.0192308	0.0147516	0.0159176	0.0106472	0.008726	0.0416942
6330403K07Rik	0.748319	0.894231	0.784161	0.940387	0.696555	0.969168	0.972042
6330403L08Rik	0.0105668	0.0192308	0.0248447	0.00218477	0.0161795	0.0034904	0.0257121
6330403N20Rik	0.00288184	0	0.000776398	0.00031211	0.000208768	0	0.00162902
6330409D20Rik	0.00288184	0.00961538	0.00232919	0.00218477	0.00313152	0.0034904	0.0280896
6330418K02Rik	0.0384246	0.00961538	0.0271739	0.022784	0.0249478	0.0209424	0.0723374
6330420H09Rik	0	0	0	0	0.000417537	0	0.00171708
6330562C20Rik	0.00480307	0.0288462	0.0287267	0.0106117	0.0352818	0.00988947	0.0307753
6330576A10Rik	0	0.00961538	0	0.00093633	0.000313152	0.00116347	0.00228944
6430503K07Rik	0.00864553	0	0.0131988	0.0377653	0.0754697	0.0232693	0.00589971
6430531B16Rik	0.000960615	0	0.0015528	0.00561798	0.00125261	0.00116347	0.0149694
6430548M08Rik	0.0336215	0.0288462	0.0427019	0.0402622	0.0552192	0.0389761	0.226654
6430550D23Rik	0.00288184	0.00961538	0	0.00374532	0.00240084	0.00116347	0.00427068
6430571L13Rik	0	0	0.00232919	0.0031211	0.00177453	0.00232693	0.023863
6430573F11Rik	0.00576369	0.00961538	0.0279503	0.0752185	0.0132568	0.0110529	0.0457447
6430573P05Rik	0.00768492	0.00961538	0.00776398	0.00218477	0.00354906	0.0034904	0.0066922
6430584L05Rik	0	0	0.000776398	0.00062422	0.000104384	0.00116347	0.00162902
6430628N08Rik	0.00192123	0	0.0015528	0.00156055	0.000417537	0.00232693	0.0208251
6430710C18Rik	0	0	0	0	0	0	0.00294985
6530403H02Rik	0	0	0.00232919	0	0.000417537	0	0.0131643
6530409C15Rik	0.00288184	0	0.00310559	0.00187266	0.0258873	0.00232693	0.00889359
6530437J22Rik	0.00288184	0	0.0015528	0.00156055	0.00271399	0.00290867	0.0121957
6720427I07Rik	0.00480307	0	0.00776398	0.0237203	0.00334029	0.00465387	0.0233347
6720483E21Rik	0.000960615	0	0.00388199	0.00499376	0.00292276	0.000581734	0.00889359
6720489N17Rik	0.00288184	0.00961538	0.0015528	0.00405743	0.00626305	0.0034904	0.0109629
6820408C15Rik	0.000960615	0	0.00465839	0.00156055	0.00354906	0.00232693	0.0210452
8030423F21Rik	0.000960615	0	0.000776398	0.00124844	0.000417537	0.0017452	0.0046229
8030462N17Rik	0.00288184	0	0.00465839	0.00156055	0.00240084	0.000581734	0.00378638
8430408G22Rik	0.000960615	0	0.0838509	0.00062422	0.000939457	0	0.00105666
8430432A02Rik	0.00288184	0	0.00310559	0.00156055	0.00156576	0.00232693	0.0054154
9030025P20Rik	0.00864553	0.0192308	0.00698758	0.00998752	0.0135699	0.0157068	0.0264166
9030612E09Rik	0.00384246	0.0192308	0.000776398	0.00280899	0.00292276	0.0069808	0.022278
9030624G23Rik	0	0.00961538	0.0147516	0.00124844	0.00135699	0.000581734	0.00783692
9030624J02Rik	0.0979827	0.0961538	0.0892857	0.06804	0.0950939	0.0645724	0.137895
9130008F23Rik	0.000960615	0.0192308	0.0217391	0.00062422	0	0.000581734	0.00171708
9130011E15Rik	0.00288184	0	0.00543478	0.00093633	0.00302714	0.00290867	0.00726456
9130019O22Rik	0.00960615	0	0.0100932	0.00405743	0.00730689	0.00814427	0.0155858
9130023H24Rik	0.00768492	0	0.0131988	0.00655431	0.00876827	0.00756254	0.00792498
9130213A22Rik	0.00192123	0	0.0015528	0.00374532	0.000835073	0.00407213	0.0062079
9130221H12Rik	0.00768492	0	0.0124224	0.00530587	0.0059499	0.00465387	0.017567
9130230L23Rik	0.0115274	0	0.000776398	0.00093633	0.000417537	0	0.00118875
9130401M01Rik	0.0576369	0.0576923	0.0854037	0.0536829	0.094572	0.0767888	0.17162
9130410C08Rik	0	0	0.000776398	0	0	0	0.00140888
9130604C24Rik	0.00576369	0.00961538	0.0139752	0.00655431	0.0124217	0.00465387	0.0168626
9230104M06Rik	0.00192123	0	0.000776398	0.00093633	0.00219207	0.00116347	0.00171708
9230110C19Rik	0.000960615	0	0	0.00468165	0.00146138	0.00232693	0.0148813
9230111E07Rik	0.000960615	0	0.00310559	0.00218477	0.000417537	0.0017452	0.00272971
9230112J17Rik	0	0	0.011646	0.00031211	0.000104384	0	0.000924581
9330020H09Rik	0.0211335	0.00961538	0.0256211	0.0193508	0.0139875	0.0127981	0.0431031
9330102E08Rik	0.00192123	0	0	0.00093633	0.00114823	0.00116347	0.00995025
9330104G04Rik	0.00576369	0.0192308	0.00698758	0.00187266	0.018476	0.00581734	0.0454365
9330111N05Rik	0.000960615	0	0.000776398	0	0.00501044	0	0.000924581
9330121J05Rik	0.00192123	0	0.0015528	0.0152934	0.00177453	0.00407213	0.00435874
9330136K24Rik	0	0	0.00310559	0.00530587	0.00146138	0.00290867	0.0121076
9330158H04Rik	0.00576369	0.00961538	0.00698758	0.00436954	0.0045929	0.00290867	0.0576322
9330159F19Rik	0.024976	0.00961538	0.0450311	0.0789638	0.148852	0.0977312	0.237617
9330160F10Rik	0.0451489	0.0288462	0.0256211	0.0165418	0.0117954	0.00930774	0.0714128
9330161L09Rik	0.000960615	0	0	0.00031211	0.000313152	0.0017452	0.00383041
9330171B17Rik	0.000960615	0	0.000776398	0.00093633	0.000835073	0.000581734	0.011139
9330179D12Rik	0.00576369	0	0.00621118	0.00468165	0.00407098	0.00930774	0.0329767
9330182L06Rik	0.00768492	0	0.0147516	0.00655431	0.0623173	0.0232693	0.118919
9330198I05Rik	0	0	0.000776398	0.00062422	0.000208768	0.000581734	0.0028618
9330198N18Rik	0	0	0.0015528	0.00062422	0.000730689	0	0.00250958
9330199G10Rik	0.00288184	0	0.000776398	0.00156055	0.0283925	0	0.00110069
9430002A10Rik	0	0	0	0.00031211	0.00104384	0	0.00189319
9430015G10Rik	0.0144092	0	0.0201863	0.0134207	0.0135699	0.0122164	0.0465372
9430037G07Rik	0.000960615	0	0.000776398	0.00218477	0.000730689	0.000581734	0.00629595
9430038I01Rik	0.0365034	0.0384615	0.052795	0.0218477	0.0382046	0.0285049	0.0718972
9430041J12Rik	0.000960615	0	0.00388199	0.0493134	0.00354906	0.0034904	0.0198565
9430060I03Rik	0.0605187	0.00961538	0.0318323	0.00905119	0.0101253	0.00814427	0.0771364
9430065F17Rik	0.00288184	0	0.00465839	0.0115481	0.0179541	0.00756254	0.0183155
9430078K24Rik	0	0	0	0.00031211	0	0.000581734	0.00259763
9430085M18Rik	0.00192123	0.00961538	0.0015528	0.00062422	0.000730689	0.00116347	0.00418263
9430097D07Rik	0	0	0.000776398	0.00031211	0.000521921	0	0.00664818
9530026P05Rik	0.00288184	0.0576923	0.0194099	0.0109238	0.0019833	0.00290867	0.022234
9530034E10Rik	0.012488	0	0.0380435	0.0093633	0.0279749	0.0145433	0.0196363
9530036O11Rik	0	0	0.00232919	0.00062422	0.00135699	0.00814427	0.0289262
9530046B11Rik	0	0	0	0.00156055	0.000208768	0.00116347	0.00312596
9530059O14Rik	0.0067243	0.0192308	0.0209627	0.00530587	0.0522965	0.04363	0.264078
9530068E07Rik	0.161383	0.182692	0.148292	0.0786517	0.168476	0.119837	0.260952
9530077C05Rik	0.0163305	0.0288462	0.0240683	0.0271536	0.0185804	0.0244328	0.0861621
9530082P21Rik	0.0115274	0	0.0287267	0.0127965	0.0110647	0.0145433	0.044512
9630001P10Rik	0	0	0	0.00031211	0.000626305	0.00232693	0.00783692
9630002D21Rik	0	0	0	0	0.000313152	0	0.00136486
9630009A06Rik	0.000960615	0.00961538	0.00232919	0.00124844	0.0232777	0	0.000660415
9630013A20Rik	0.000960615	0	0.00232919	0.00093633	0.00292276	0.026178	0.00211333
9630028H03Rik	0	0	0	0.00031211	0	0	0.00176111
9630041A04Rik	0	0	0.000776398	0.00031211	0.000835073	0.000581734	0.000704442
9930004E17Rik	0.000960615	0	0.00388199	0.00062422	0.000208768	0	0.00228944
9930012K11Rik	0.00384246	0.0192308	0.0209627	0.00343321	0.0109603	0.000581734	0.0248756
9930021J03Rik	0.0537944	0.0576923	0.0861801	0.0546192	0.105532	0.0680628	0.207326
9930104L06Rik	0.00480307	0.00961538	0.0178571	0.00967541	0.0188935	0.0069808	0.0425747
9930111J21Rik2	0.092219	0.00961538	0.0621118	0	0.000521921	0	0.000528332
A030001D20Rik	0.012488	0.0288462	0.0201863	0.0193508	0.0217119	0.0285049	0.100207
A030005L19Rik	0	0	0.0015528	0.00124844	0.000521921	0.00407213	0.00343416
A130010J15Rik	0.0288184	0.0192308	0.0310559	0.0174782	0.0146138	0.0302501	0.0498393
A130051J06Rik	0.00192123	0.00961538	0.0015528	0.00062422	0	0	0.0025536
A130077B15Rik	0.0163305	0	0	0	0.000521921	0.00116347	0.00233347
A230001M10Rik	0.00768492	0.00961538	0.0100932	0.00249688	0.116284	0.0017452	0.00277374
A230005M16Rik	0.00192123	0	0	0.00093633	0.000626305	0.00116347	0.00660415
A230006K03Rik	0.00480307	0.00961538	0.00388199	0.00405743	0.00386221	0.0052356	0.154009
A230009B12Rik	0.0115274	0.0384615	0.015528	0.0031211	0.132985	0.0034904	0.00519526
A230020J21Rik	0.000960615	0	0	0	0.000313152	0.000581734	0.00136486
A230050P20Rik	0.0576369	0.105769	0.0690994	0.053995	0.0392484	0.0727167	0.275393
A230057D06Rik	0.0105668	0	0.0131988	0.0205993	0.018476	0.0418848	0.178796
A230060F14Rik	0.000960615	0	0.000776398	0.00031211	0.00187891	0.0017452	0.0028618
A230065N10Rik	0	0	0.00621118	0.00062422	0.000417537	0.0034904	0.00479901
A230072E10Rik	0.00192123	0	0.0015528	0.00561798	0.00344468	0.0017452	0.0262405
A230077H06Rik	0.00192123	0	0.000776398	0.00124844	0.000939457	0.0215241	0.0132964
A230083G16Rik	0.000960615	0	0	0.00218477	0.00208768	0.00232693	0.00607582
A230083N12Rik	0.00192123	0	0.00310559	0.00124844	0.000626305	0.00116347	0.00501915
A230087F16Rik	0.00384246	0	0.00543478	0.00218477	0.00177453	0.0104712	0.102937
A230107N01Rik	0.00288184	0	0.00310559	0.00561798	0.00208768	0.00290867	0.0101704
A2m	0.00192123	0.0192308	0.00232919	0.031211	0.00156576	0.00116347	0.00198124
A2ml1	0.0874159	0.105769	0.0885093	0.0948814	0.0798539	0.0954043	0.131775
A330008L17Rik	0.000960615	0	0.00465839	0.00343321	0.00386221	0.00581734	0.0325805
A330009N23Rik	0.00384246	0	0.0318323	0.00343321	0.00521921	0.0052356	0.0320081
A330015K06Rik	0.00480307	0	0.00698758	0.00124844	0.0719207	0.0017452	0.00228944
A330032B11Rik	0	0	0	0.00093633	0.000835073	0	0.00233347
A330033J07Rik	0	0	0.000776398	0.00031211	0.000313152	0.000581734	0.00431471
A330035P11Rik	0.00384246	0	0.00232919	0.00062422	0.00146138	0.000581734	0.00215735
A330041J22Rik	0.00768492	0	0.00543478	0.0209114	0.00741127	0.00756254	0.0443358
A330048O09Rik	0.000960615	0.00961538	0.00621118	0.0337079	0.0039666	0.00290867	0.00814512
A330049N07Rik	0.00192123	0.00961538	0.00232919	0.00031211	0.0382046	0.0017452	0.001585
A330069E16Rik	0.0384246	0.0288462	0.0357143	0.0346442	0.0480167	0.0383944	0.172764
A330069K06Rik	0	0	0	0.00031211	0.000313152	0	0.0012768
A330070K13Rik	0.000960615	0	0.000776398	0.00062422	0.000835073	0	0.00435874
A330074K22Rik	0.000960615	0	0.00310559	0.0031211	0.00135699	0.000581734	0.0141769
A330076C08Rik	0.0105668	0.0192308	0.0163043	0.196941	0.0110647	0.0052356	0.0154977
A330084C13Rik	0.00288184	0.00961538	0.0015528	0.00062422	0.00125261	0.00116347	0.0147493
A330087D11Rik	0.000960615	0	0.0015528	0.0202871	0.000417537	0.00116347	0.000880553
A330094K24Rik	0.000960615	0	0.000776398	0.00062422	0.000104384	0.000581734	0.00237749
A330102I10Rik	0.00864553	0.0288462	0.00854037	0.00655431	0.00751566	0.0255963	0.0515564
A430005L14Rik	0.118156	0.163462	0.149068	0.0642946	0.122234	0.0843514	0.194514
A430027H14Rik	0.00384246	0	0.00543478	0.00842697	0.00365344	0.0209424	0.0614186
A430033K04Rik	0.0134486	0	0.0194099	0.0193508	0.0160752	0.0191972	0.0618148
A430046D13Rik	0.0182517	0.00961538	0.0333851	0.0177903	0.0237996	0.0110529	0.0524369
A430057M04Rik	0.00480307	0	0.0015528	0.00031211	0.000313152	0.000581734	0.00457888
A430073D23Rik	0	0	0.00310559	0.0062422	0.00250522	0.00407213	0.00242152
A430078I02Rik	0.0144092	0.00961538	0.00388199	0.00031211	0.000626305	0	0.00810109
A430105I19Rik	0.00576369	0.00961538	0.0543478	0.0140449	0.0186848	0.00407213	0.011095
A430105J06Rik	0.00480307	0	0.00776398	0.00967541	0.00177453	0.00465387	0.017523
A430106G13Rik	0.00576369	0	0.00543478	0.00436954	0.00709812	0.0127981	0.0116233
A430110L20Rik	0.00960615	0	0.0015528	0.00530587	0.00104384	0	0.00396249
A4galt	0.000960615	0.125	0.106366	0.00031211	0.000208768	0	0.000704442
A530017D24Rik	0.012488	0.0288462	0.0194099	0.00842697	0.0117954	0.0186155	0.062123
A530076I17Rik	0	0	0.000776398	0.00374532	0.000626305	0.000581734	0.00074847
A530095I07Rik	0	0	0.000776398	0.00062422	0.000313152	0.000581734	0.00277374
A630001G21Rik	0.0739673	0	0.000776398	0	0	0.000581734	0.000484304
A630023P12Rik	0	0	0	0	0	0	0.00171708
A630072M18Rik	0.0067243	0.0384615	0.0419255	0.0265293	0.0117954	0.0157068	0.0257121
A630089N07Rik	0.00576369	0	0.00543478	0.0093633	0.00344468	0.00639907	0.0155858
A730011C13Rik	0	0	0.00232919	0.00218477	0.00167015	0.000581734	0.00466693
A730015C16Rik	0.000960615	0	0.0124224	0.00031211	0.000939457	0	0.00352221
A730017C20Rik	0.112392	0.125	0.0908385	0.118602	0.111587	0.197208	0.459869
A730020M07Rik	0.00384246	0.0288462	0.00232919	0.0212235	0.00177453	0.00290867	0.00246555
A730035I17Rik	0	0	0	0.00062422	0.000104384	0	0.00118875
A730043L09Rik	0.000960615	0	0.000776398	0.00031211	0.000208768	0	0.00162902
A730046J19Rik	0.00192123	0.00961538	0.000776398	0	0.000939457	0.0017452	0.0167305
A730049H05Rik	0	0.00961538	0	0	0.000208768	0.00116347	0.00316999
A730056A06Rik	0	0.0288462	0.00621118	0.0190387	0.00302714	0.00988947	0.00664818
A730060N03Rik	0.00192123	0	0.00310559	0.00062422	0.000730689	0	0.0205609
A730063M14Rik	0.0201729	0.0288462	0.0201863	0.0134207	0.0180585	0.00930774	0.0247435
A730071L15Rik	0.00192123	0	0.00388199	0.00187266	0.000521921	0.0017452	0.0102144
A730081D07Rik	0.000960615	0	0.00310559	0.00374532	0.00323591	0.00290867	0.0169066
A730098A19Rik	0.00480307	0	0.000776398	0.00468165	0.00563674	0.00581734	0.0312596
A830005F24Rik	0.00384246	0.00961538	0	0.00156055	0.00553236	0.00290867	0.00950997
A830008E24Rik	0.049952	0.00961538	0	0.011236	0.000208768	0	0.00105666
A830009L08Rik	0.000960615	0.00961538	0	0.00655431	0.00281837	0.00116347	0.00339013
A830010M20Rik	0.0345821	0.00961538	0.0349379	0.0355805	0.12881	0.0413031	0.150619
A830011K09Rik	0.000960615	0	0	0.00156055	0.00114823	0.00290867	0.0120195
A830018L16Rik	0.00960615	0.0192308	0.0186335	0.00998752	0.00981211	0.00814427	0.161317
A830019P07Rik	0.000960615	0.00961538	0.00310559	0.0165418	0.00281837	0.0017452	0.00294985
A830029E22Rik	0.000960615	0	0.0015528	0	0.000313152	0	0.0033461
A830031A19Rik	0	0	0	0.00031211	0.000313152	0	0.00233347
A830035O19Rik	0.000960615	0.00961538	0.00465839	0.0031211	0.00302714	0.00232693	0.00889359
A830036E02Rik	0	0	0	0	0.000104384	0	0.00259763
A830052D11Rik	0.0105668	0	0.00931677	0.00468165	0.0337161	0.0017452	0.0164223
A830082K12Rik	0.0153698	0.0192308	0.0302795	0.0524345	0.00845511	0.0290867	0.0911813
A830092H15Rik	0.00384246	0.00961538	0.00310559	0.00249688	0.00271399	0.008726	0.0690354
A930001A20Rik	0.000960615	0	0	0.00780275	0.00146138	0.000581734	0.00101264
A930002C04Rik	0.000960615	0	0	0	0.000104384	0.0017452	0.00224541
A930003A15Rik	0.00480307	0	0.00465839	0.00062422	0.0271399	0.0017452	0.00268569
A930003O13Rik	0.00288184	0.00961538	0.00388199	0.00280899	0.0019833	0.00814427	0.0150575
A930004D18Rik	0.00192123	0.00961538	0.00621118	0.0031211	0.00407098	0.00232693	0.0183155
A930006I01Rik	0.00480307	0	0.00310559	0.00156055	0.0381002	0.0017452	0.00347818
A930007I19Rik	0.0480307	0	0.00232919	0.00031211	0.000835073	0.00116347	0.00532735
A930009A15Rik	0.00384246	0	0.0015528	0.00873908	0.00344468	0.0988947	0.00405054
A930012L18Rik	0.00288184	0.0192308	0.00310559	0.00499376	0.00240084	0.00232693	0.0145291
A930015D03Rik	0.00192123	0.00961538	0.00388199	0.00561798	0.00480167	0.008726	0.0122397
A930016O22Rik	0.00192123	0	0.000776398	0.00062422	0.000417537	0.000581734	0.0070004
A930017K11Rik	0.00192123	0.0192308	0.000776398	0.00062422	0.02881	0.000581734	0.00154097
A930024E05Rik	0.00576369	0.00961538	0.00388199	0.00593009	0.00292276	0.00407213	0.0107427
A930024N18Rik	0	0.00961538	0.0015528	0.00031211	0.00167015	0.00116347	0.00611984
A930028N01Rik	0	0	0.00931677	0.00405743	0.0257829	0.00116347	0.00325805
A930029G22Rik	0.0268972	0.0288462	0.015528	0.00561798	0.0019833	0.00639907	0.027121
A930033H14Rik	0.0220941	0	0.0310559	0.00062422	0.000521921	0.0017452	0.0233787
A930041C12Rik	0	0	0	0.00031211	0.000313152	0	0.00123277
AA387200	0	0	0.000776398	0.00031211	0.000104384	0	0.00220138
AA467197	0.00384246	0	0.000776398	0.00124844	0.00490605	0.0034904	0.00356624
AA543186	0.000960615	0	0.000776398	0.00124844	0.00187891	0	0.00308194
AA986860	0.00192123	0.00961538	0.00388199	0.00343321	0.0140919	0.00232693	0.00814512
Aaas	0.0105668	0.0288462	0.015528	0.011236	0.013048	0.0127981	0.0280016
Aacs	0.0172911	0	0.015528	0.0205993	0.0509395	0.0255963	0.0792057
Aadat	0	0	0	0	0	0	0.00145291
Aaed1	0.0451489	0.105769	0.13354	0.036829	0.0473904	0.0302501	0.0848413
Aagab	0.108549	0.0192308	0.0310559	0.0212235	0.0346555	0.0226876	0.0884515
Aak1	0.0691643	0.0769231	0.0892857	0.0830212	0.0712944	0.0837696	0.336812
Aamdc	0.162344	0.221154	0.263975	0.177278	0.4238	0.158813	0.277286
Aamp	0.413064	0.490385	0.343944	0.26623	0.501044	0.265271	0.355831
Aanat	0	0	0	0	0.000104384	0	0.00228944
Aar2	0.0288184	0.0769231	0.0458075	0.0302747	0.0580376	0.0343223	0.103289
Aard	0.0182517	0	0.0256211	0.0237203	0.0163883	0.0308319	0.13631
Aars	0.172911	0.105769	0.0753106	0.0674157	0.102923	0.0779523	0.196319
Aars2	0.0201729	0.0288462	0.0170807	0.0224719	0.0164927	0.0110529	0.0617708
Aarsd1	0.00960615	0	0.0194099	0.011236	0.0154489	0.0127981	0.0659534
Aasdh	0.00864553	0.00961538	0.0131988	0.0159176	0.0127349	0.00988947	0.0317439
Aasdhppt	0.0634006	0.0865385	0.0729814	0.0543071	0.100209	0.0628272	0.136882
Aass	0	0	0.00232919	0.0196629	0.00208768	0	0.00180513
Aatf	0.0768492	0.105769	0.0364907	0.0221598	0.0370564	0.034904	0.0645005
Aatk	0.0509126	0.0673077	0.0830745	0.0736579	0.394781	0.0913322	0.248536
AB041806	0.000960615	0	0.0015528	0.00062422	0.00104384	0.00290867	0.030247
Abat	0.0576369	0.105769	0.0706522	0.196005	0.081524	0.0965678	0.30969
Abca1	0.154659	0.144231	0.0333851	0.159488	0.0298539	0.0919139	0.0266808
Abca2	0.0605187	0.0961538	0.0908385	0.0858302	0.596868	0.0738802	0.264122
Abca3	0.0518732	0.0480769	0.0481366	0.051186	0.0344468	0.0541012	0.184784
Abca4	0	0.00961538	0.000776398	0.00218477	0.000417537	0	0.000968608
Abca5	0.00864553	0.0576923	0.0349379	0.0196629	0.0231733	0.0471204	0.209616
Abca6	0.000960615	0	0.000776398	0.00124844	0.0148225	0.0290867	0.0028618
Abca7	0.0240154	0.00961538	0.0240683	0.0134207	0.0213987	0.0296684	0.0442038
Abca8a	0.0115274	0.490385	0.0310559	0.00156055	0.114092	0.00407213	0.0046229
Abca8b	0.00192123	0.0384615	0.00465839	0.00436954	0.0122129	0.0139616	0.039801
Abca9	0.107589	0.0865385	0.00621118	0	0.000104384	0	0.00145291
Abcb10	0.0240154	0.0384615	0.0380435	0.0259051	0.0832985	0.0215241	0.111962
Abcb1a	0.000960615	0.00961538	0.292702	0	0.000730689	0	0.00277374
Abcb1b	0.0595581	0	0.00543478	0.00998752	0.00250522	0.0145433	0.0104786
Abcb4	0.0297791	0	0.00388199	0.0102996	0.00167015	0.0424666	0.0100823
Abcb6	0.0153698	0.0384615	0.0170807	0.0140449	0.0113779	0.017452	0.0507639
Abcb7	0.0288184	0.00961538	0.0357143	0.0205993	0.0272443	0.0337405	0.131907
Abcb8	0.0326609	0.0192308	0.0372671	0.0552434	0.14071	0.0663176	0.114692
Abcb9	0.0192123	0.0192308	0.0279503	0.0951935	0.0257829	0.00930774	0.106415
Abcc1	0.0220941	0	0.0147516	0.00967541	0.0222338	0.0232693	0.0498393
Abcc10	0.00960615	0.00961538	0.0139752	0.0209114	0.00929019	0.00814427	0.0646766
Abcc3	0.0605187	0	0	0	0.000521921	0.000581734	0.000880553
Abcc4	0.00384246	0	0.0753106	0.00405743	0.000417537	0.00581734	0.00427068
Abcc5	0.0979827	0.0673077	0.0885093	0.127965	0.123382	0.0936591	0.263241
Abcc8	0.000960615	0	0.00310559	0.00280899	0.00167015	0.00116347	0.0347378
Abcc9	0	0	0.138975	0.00124844	0.000417537	0.00116347	0.00691234
Abcd1	0.0595581	0.00961538	0.0357143	0.0202871	0.0220251	0.0197789	0.036587
Abcd2	0.067243	0.0192308	0.0100932	0.0664794	0.00511482	0.00465387	0.0243473
Abcd3	0.0758886	0.144231	0.0807453	0.139825	0.120772	0.15765	0.18113
Abcd4	0.0422671	0.0769231	0.0590062	0.0895755	0.0543841	0.0796975	0.0993264
Abce1	0.0701249	0.0576923	0.104037	0.0555556	0.076096	0.054683	0.159072
Abcf1	0.194044	0.153846	0.214286	0.10799	0.284551	0.121001	0.202571
Abcf2	0.0874159	0.0480769	0.0861801	0.0564919	0.0780793	0.0593368	0.147625
Abcf3	0.0691643	0.0769231	0.0659938	0.0543071	0.0837161	0.0680628	0.15982
Abcg1	0.0585975	0.0865385	0.0411491	0.0174782	0.236013	0.140198	0.14987
Abcg2	0.0470701	0.0769231	0.340062	0.0205993	0.0101253	0.103549	0.0386563
Abcg4	0.0105668	0.00961538	0.0194099	0.0302747	0.00908142	0.0372309	0.162286
Abhd10	0.0422671	0.0576923	0.0838509	0.0699126	0.0620042	0.0703898	0.132259
Abhd11	0.0912584	0.0865385	0.068323	0.114232	0.105741	0.0756254	0.208251
Abhd12	0.720461	0.211538	0.145963	0.207241	0.352296	0.374636	0.49082
Abhd13	0.0355427	0.0384615	0.0295031	0.036829	0.023904	0.0273415	0.0782371
Abhd14a	0.0701249	0.211538	0.0900621	0.132022	0.226931	0.116347	0.20081
Abhd14b	0.0489914	0.115385	0.0931677	0.1598	0.0455115	0.0203607	0.117378
Abhd15	0.0489914	0	0.000776398	0.00374532	0.00177453	0	0.00361027
Abhd16a	0.146974	0.201923	0.197205	0.125468	0.193215	0.154741	0.24836
Abhd17a	0.190202	0.134615	0.228261	0.102996	0.387787	0.108202	0.230177
Abhd17b	0.0585975	0.0192308	0.0636646	0.0658552	0.314196	0.0913322	0.118787
Abhd17c	0.183477	0.0673077	0.0504658	0.0471286	0.076618	0.0855148	0.0957161
Abhd18	0.0182517	0.0192308	0.0326087	0.0733458	0.0433194	0.0477022	0.183243
Abhd2	0.0585975	0.0384615	0.317547	0.0758427	0.0724426	0.411286	0.090697
Abhd3	0.0509126	0.0673077	0.0504658	0.357366	0.0979123	0.132635	0.0566196
Abhd4	0.0758886	0.0384615	0.0698758	0.100187	0.183299	0.0703898	0.0368952
Abhd5	0.0365034	0.0480769	0.0613354	0.0252809	0.20334	0.0273415	0.022366
Abhd6	0.17195	0.0384615	0.0574534	0.0970662	0.0772443	0.0878418	0.103421
Abhd8	0.152738	0.240385	0.215839	0.176654	0.126514	0.166958	0.524457
Abi1	0.179635	0.125	0.125	0.122971	0.0771399	0.0837696	0.184168
Abi2	0.0489914	0.134615	0.106366	0.0792759	0.0984342	0.14776	0.34663
Abi3	0.520653	0	0.0209627	0.00093633	0.00292276	0.0017452	0.0049311
Abi3bp	0.00288184	0.00961538	0.011646	0.0121723	0.00386221	0.00581734	0.105931
Abl1	0.0960615	0.0673077	0.0799689	0.0224719	0.132985	0.0209424	0.0460529
Abl2	0.0326609	0.00961538	0.0326087	0.0268414	0.0226514	0.0209424	0.0853696
Ablim1	0.0393852	0.0288462	0.291149	0.10799	0.022547	0.0226876	0.179149
Ablim2	0.0240154	0.0288462	0.0279503	0.0415106	0.0856994	0.0354857	0.218245
Ablim3	0.00864553	0.00961538	0.0178571	0.00780275	0.00908142	0.0104712	0.123013
Abr	0.106628	0.105769	0.175466	0.236267	0.0469729	0.115183	0.341787
Abracl	0.199808	0.0673077	0.131988	0.022784	0.0217119	0.0424666	0.109189
Abraxas1	0.00864553	0.00961538	0.0178571	0.0224719	0.0176409	0.0255963	0.0448201
Abraxas2	0.0758886	0.0673077	0.0628882	0.0580524	0.0662839	0.061082	0.16867
Abt1	0.0566763	0.0673077	0.0947205	0.039638	0.0662839	0.0482839	0.120944
Abtb1	0.114313	0.0961538	0.0854037	0.0605493	0.0931106	0.0744619	0.159248
Abtb2	0.00960615	0.0192308	0.0271739	0.0337079	0.0495825	0.0843514	0.0109189
AC061963.1	0.000960615	0	0.000776398	0.00093633	0.00104384	0.00116347	0.0090697
AC078895.1	0.00480307	0	0.00698758	0.00343321	0.00438413	0.00639907	0.0538018
AC101921.1	0.00192123	0	0.0015528	0.00187266	0.000730689	0.0296684	0.0272091
AC110166.2	0	0	0	0.00187266	0.000626305	0.00116347	0.00638401
AC110241.2	0	0	0	0.00031211	0.00334029	0	0
AC113587.1	0.000960615	0	0.0015528	0.00062422	0.000626305	0.00116347	0.00246555
AC114585.1	0	0	0	0.00249688	0.000626305	0.00116347	0.0188438
AC116487.2	0	0	0	0.00093633	0.00835073	0	0.00184916
AC118542.1	0.00576369	0.00961538	0.00854037	0.0031211	0.0039666	0.0052356	0.109717
AC122413.1	0.0067243	0	0.00621118	0.00561798	0.00699374	0.00581734	0.0293664
AC123724.1	0.00480307	0	0.00698758	0.00280899	0.00375783	0.00232693	0.00757276
AC123870.1	0	0.00961538	0	0.00156055	0.00647182	0.00116347	0.000132083
AC124532.2	0	0	0.00232919	0.00062422	0.000521921	0.000581734	0.00316999
AC124561.1	0	0	0.000776398	0	0	0.000581734	0.0140008
AC124739.2	0	0	0.000776398	0.00124844	0.000835073	0.000581734	0.00871747
AC125141.1	0.00192123	0	0	0.00405743	0.000521921	0.0104712	0.00629595
AC125141.3	0	0	0	0	0.000313152	0	0.00189319
AC125371.2	0	0	0	0	0.000104384	0.00116347	0.00378638
AC126055.1	0	0	0	0.00062422	0.00208768	0.00116347	0.000704442
AC127341.3	0.037464	0	0.0131988	0.00187266	0.000939457	0.0017452	0.0161581
AC127341.5	0.00192123	0	0	0.00156055	0.000626305	0.00116347	0.00290582
AC129328.1	0.000960615	0.00961538	0.00310559	0.00655431	0.00427975	0.00407213	0.00880553
AC130815.2	0.0067243	0.125	0.0186335	0.00062422	0.0173278	0	0.00149694
AC133505.1	0.00576369	0	0.00621118	0.00655431	0.0498956	0.0145433	0.00259763
AC139671.1	0.00864553	0	0.00931677	0	0	0	0.000440276
AC140186.1	0.000960615	0	0	0.00093633	0.00292276	0.000581734	0.00250958
AC140300.1	0	0.00961538	0	0.00062422	0.000417537	0.0017452	0.00330207
AC144408.3	0.00192123	0	0	0.00062422	0.000417537	0.000581734	0.00176111
AC146911.1	0.0720461	0.00961538	0.0209627	0.0165418	0.0271399	0.0308319	0.0434553
AC149090.1	0.3122	0.173077	0.174689	0.202871	0.135386	0.233275	0.528772
AC150035.3	0.00288184	0	0.0015528	0	0.000104384	0	0.0012768
AC151836.1	0.000960615	0	0.0147516	0	0.000417537	0	0.000176111
AC152827.1	0.00384246	0.00961538	0.00854037	0.00905119	0.00876827	0.00581734	0.0189759
AC153140.2	0.000960615	0	0.0015528	0.00062422	0.000626305	0.00232693	0.00369832
AC154200.1	0	0	0	0.00031211	0.000313152	0	0.00105666
AC154509.1	0	0	0	0	0	0.000581734	0.00215735
AC154683.1	0.000960615	0	0.0100932	0.0131086	0.000730689	0	0.00198124
AC154760.1	0.00384246	0.0192308	0.0015528	0.0062422	0.00281837	0.00465387	0.0241272
AC156026.1	0	0	0	0	0.000313152	0	0.00510721
AC158554.1	0.00192123	0	0.0015528	0.00156055	0.000626305	0	0.00343416
AC159282.1	0	0	0.000776398	0	0	0	0.00180513
AC160336.1	0.079731	0.125	0.0916149	0.0608614	0.081524	0.0552647	0.215119
AC160562.1	0.0345821	0	0	0	0.000104384	0	0.000264166
AC161165.3	0	0	0.0015528	0.00156055	0.00313152	0.0017452	0.00937789
AC161165.6	0.0067243	0	0.00465839	0.00530587	0.00584551	0.00465387	0.0216616
AC161199.1	0.000960615	0	0	0	0	0	0.00132083
AC161376.2	0.00288184	0.0288462	0.00543478	0.00124844	0.0882046	0.0017452	0.00268569
AC162302.1	0.00288184	0.0192308	0.0108696	0.00593009	0.00949896	0.00232693	0.00391846
AC163032.1	0.00768492	0.00961538	0.00854037	0.0093633	0.0164927	0.00988947	0.0443358
AC163040.1	0.00192123	0	0.00465839	0.00062422	0.00177453	0.000581734	0.00563554
AC163633.1	0.00384246	0	0.000776398	0.00280899	0.00281837	0.00116347	0.0309074
AC163720.3	0.000960615	0	0.0015528	0.00031211	0.000939457	0	0.00228944
AC164424.1	0	0.00961538	0.00543478	0.00093633	0.000835073	0.0034904	0.0170827
AC165271.1	0	0	0	0.00156055	0.000104384	0	0.00114472
AC165953.2	0.0192123	0.0192308	0.0240683	0.0252809	0.019833	0.0255963	0.110333
AC168977.1	0.00192123	0	0.000776398	0	0	0.000581734	0.00924581
AC174678.1	0.00288184	0	0.0015528	0.00436954	0.00219207	0.00232693	0.00484304
Acaa1a	0.292027	0.259615	0.234472	0.206305	0.363257	0.208842	0.197596
Acaa1b	0.00192123	0	0.00232919	0.00093633	0.00125261	0.00232693	0.00871747
Acaa2	0.0634006	0.153846	0.11646	0.0955056	0.0179541	0.00988947	0.0320962
Acaca	0.0192123	0.0961538	0.0496894	0.0699126	0.221921	0.0488656	0.168318
Acacb	0.00480307	0	0.0357143	0.0124844	0.00302714	0.00232693	0.0304671
Acad10	0.00576369	0	0.00621118	0.00561798	0.00334029	0.0017452	0.00920178
Acad11	0.00864553	0.00961538	0.0248447	0.0305868	0.0267223	0.0139616	0.0316559
Acad12	0.0182517	0.0384615	0.0225155	0.0209114	0.0155532	0.00639907	0.0154097
Acad8	0.0441883	0.0480769	0.064441	0.0599251	0.0728601	0.0447935	0.0719412
Acad9	0.024976	0.00961538	0.0295031	0.0290262	0.0409186	0.0319953	0.0810549
Acadl	0.054755	0.0865385	0.100932	0.0855181	0.101461	0.0401396	0.0232906
Acadm	0.148895	0.192308	0.188665	0.114544	0.0888309	0.069808	0.108352
Acads	0.222863	0.0673077	0.0698758	0.0524345	0.0269311	0.0418848	0.0359706
Acadsb	0.0470701	0.163462	0.0799689	0.0683521	0.0549061	0.0750436	0.186281
Acadvl	0.115274	0.134615	0.118012	0.109238	0.118267	0.0663176	0.129177
Acan	0.00192123	0	0.00310559	0.00343321	0.000835073	0.0581734	0.00391846
Acap2	0.120077	0.105769	0.0861801	0.0870787	0.221294	0.0564282	0.0654251
Acap3	0.0259366	0.0288462	0.0434783	0.0305868	0.0356994	0.129145	0.0884515
Acat1	0.154659	0.125	0.187112	0.14794	0.194259	0.15765	0.224453
Acat2	0.0557157	0.0192308	0.0636646	0.0780275	0.146451	0.0901687	0.185312
Acat3	0.00192123	0	0.000776398	0.0106117	0.0026096	0.00116347	0.00272971
Acbd3	0.132565	0.144231	0.121118	0.0614856	0.0984342	0.0657359	0.15031
Acbd4	0.0317003	0.0961538	0.102484	0.0580524	0.0287056	0.0465387	0.132127
Acbd5	0.0874159	0.0673077	0.109472	0.0986267	0.167223	0.111693	0.197772
Acbd6	0.195005	0.182692	0.189441	0.114232	0.20595	0.136126	0.230749
Acbd7	0.000960615	0	0.00310559	0.0031211	0.00521921	0.00465387	0.0262845
Accs	0.0307397	0.0288462	0.0131988	0.0193508	0.00626305	0.0162885	0.025404
Acd	0.079731	0.0769231	0.0830745	0.056804	0.0827766	0.0541012	0.167569
Ace	0.00288184	0.00961538	0.0287267	0.00218477	0.00187891	0.008726	0.0710166
Ace2	0.000960615	0	0.0450311	0	0.00167015	0.000581734	0.000264166
Acer2	0.0163305	0.0192308	0.0892857	0.00686642	0.0187891	0.0052356	0.0457447
Acer3	0.119116	0.0192308	0.0271739	0.0599251	0.0178497	0.0360675	0.0976533
Ache	0.0653218	0.0480769	0.0636646	0.0471286	0.0397704	0.118674	0.458944
Acin1	0.28146	0.221154	0.276398	0.219413	0.27714	0.20128	0.323471
Ackr1	0.0105668	0.0192308	0.0225155	0.0121723	0.011691	0.0221059	0.201471
Ackr3	0.00288184	0.00961538	0.267857	0.0308989	0.0019833	0.0570099	0.00638401
Acly	0.145053	0.105769	0.14441	0.0970662	0.163048	0.08726	0.234359
Aco1	0.0297791	0.0288462	0.0341615	0.0318352	0.026096	0.0255963	0.033417
Aco2	0.181556	0.144231	0.253882	0.30025	0.275365	0.217568	0.385946
Acot1	0.0067243	0.0192308	0.0209627	0.0355805	0.16785	0.0564282	0.0204729
Acot11	0.0144092	0.00961538	0.0139752	0.117041	0.0122129	0.0052356	0.025536
Acot13	0.238232	0.230769	0.225932	0.249376	0.285595	0.198371	0.363977
Acot2	0.0307397	0.0673077	0.0652174	0.0536829	0.100104	0.0703898	0.0351781
Acot3	0.00288184	0	0.00232919	0.00156055	0.000521921	0.000581734	0.00862942
Acot4	0	0	0	0.00062422	0.000626305	0.000581734	0.00660415
Acot6	0.00192123	0.00961538	0.00776398	0.0146692	0.0195198	0.0104712	0.0157179
Acot7	0.226705	0.269231	0.21972	0.234707	0.661273	0.295521	0.486682
Acot8	0.0509126	0.0288462	0.0388199	0.0549313	0.0844468	0.0511926	0.0999428
Acot9	0.0336215	0.0192308	0.0659938	0.0121723	0.0290188	0.017452	0.0614186
Acox1	0.0585975	0.105769	0.0877329	0.0992509	0.0939457	0.0878418	0.2289
Acox3	0.205572	0.115385	0.0395963	0.0293383	0.0299582	0.017452	0.078105
Acp1	0.239193	0.230769	0.290373	0.398564	0.371399	0.628272	0.688989
Acp2	0.136407	0.0673077	0.056677	0.0683521	0.04238	0.0732984	0.180689
Acp5	0.000960615	0	0.0015528	0	0.000104384	0.000581734	0.00123277
Acp6	0.0682037	0.0480769	0.0240683	0.0383895	0.0278706	0.0395579	0.0593052
Acp7	0	0	0.000776398	0.00031211	0.000104384	0	0.00272971
Acr	0.000960615	0	0	0.00062422	0.000104384	0	0.0070004
Acrbp	0.0230548	0.0288462	0.0225155	0.0365169	0.0195198	0.0255963	0.0873509
Acsbg1	0.0605187	0.0865385	0.0504658	0.525281	0.0641962	0.080861	0.0536697
Acsf2	0.0240154	0.105769	0.0170807	0.0611735	0.0299582	0.0034904	0.00660415
Acsf3	0.012488	0.0384615	0.0163043	0.0168539	0.0129436	0.0116347	0.0503676
Acsl1	0.0951009	0.105769	0.128106	0.00842697	0.142276	0.0273415	0.14397
Acsl3	0.0893372	0.144231	0.131211	0.667291	0.201983	0.190809	0.318804
Acsl4	0.0662824	0.0288462	0.0403727	0.0240325	0.0240084	0.0255963	0.219082
Acsl5	0.110471	0.0192308	0.048913	0.0115481	0.00720251	0.0418848	0.104037
Acsl6	0.0461095	0.0961538	0.0582298	0.494694	0.0454071	0.0791158	0.175802
Acsm5	0	0	0.000776398	0.0102996	0.000939457	0	0.000660415
Acss1	0.054755	0.00961538	0.0248447	0.0980025	0.0124217	0.0541012	0.011183
Acss2	0.0211335	0.0576923	0.0380435	0.101436	0.0995825	0.026178	0.0792938
Acss3	0.00192123	0.0192308	0.00232919	0.0308989	0.00146138	0.00116347	0.00290582
Acta1	0.00864553	0.00961538	0.00854037	0.00967541	0.00908142	0.0110529	0.0864703
Acta2	0.0115274	0.0384615	0.524068	0.0149813	0.0134656	0.0157068	0.0243913
Actb	1	0.980769	0.996118	0.991261	0.996138	0.999418	0.920354
Actg1	0.907781	0.817308	0.921584	0.806492	0.753027	0.940081	0.860124
Actl6a	0.0941402	0.0288462	0.107143	0.0611735	0.0966597	0.0756254	0.10571
Actl6b	0.0345821	0.0384615	0.0380435	0.0374532	0.0370564	0.0575916	0.269009
Actn1	0.0441883	0.125	0.403727	0.0162297	0.0234864	0.0215241	0.143442
Actn2	0.00192123	0.00961538	0.000776398	0.00062422	0.000730689	0.0017452	0.0103905
Actn3	0	0	0.0015528	0.00093633	0.000208768	0.000581734	0.00479901
Actn4	0.0787704	0.192308	0.524068	0.0764669	0.181628	0.0715532	0.110333
Actr10	0.104707	0.134615	0.152174	0.117041	0.155637	0.145433	0.301942
Actr1a	0.117195	0.0769231	0.129658	0.0914482	0.280689	0.121582	0.229648
Actr1b	0.116234	0.105769	0.156056	0.102684	0.127557	0.127981	0.389909
Actr2	0.361191	0.211538	0.254658	0.122971	0.175992	0.150669	0.464624
Actr3	0.379443	0.144231	0.295031	0.0964419	0.208768	0.159395	0.339629
Actr3b	0.024976	0.0288462	0.0450311	0.0599251	0.0289144	0.0407213	0.163255
Actr5	0.0259366	0.0576923	0.0357143	0.0212235	0.0256785	0.0180337	0.0502796
Actr6	0.0365034	0.0673077	0.0458075	0.0465044	0.068476	0.0471204	0.123057
Actr8	0.0902978	0.0769231	0.103261	0.0549313	0.0940501	0.0500291	0.157135
Actrt3	0.00384246	0	0.000776398	0.00124844	0.00135699	0.00232693	0.0182715
Acvr1	0.0413064	0.0288462	0.0388199	0.0427591	0.0170146	0.0325771	0.0642804
Acvr1b	0.0211335	0.00961538	0.0170807	0.0190387	0.0106472	0.0221059	0.151763
Acvr1c	0.00480307	0.00961538	0.00543478	0.0564919	0.00229645	0.0017452	0.0307313
Acvr2a	0.0067243	0.0192308	0.0263975	0.0102996	0.00720251	0.0180337	0.0823317
Acvr2b	0.0509126	0.0480769	0.0714286	0.0296504	0.0638831	0.0552647	0.172632
Acvrl1	0.0585975	0	0.264752	0.00062422	0.000730689	0.0034904	0.00171708
Acy1	0.049952	0.0192308	0.0178571	0.0527466	0.0992693	0.0162885	0.0239951
Acy3	0.000960615	0.0288462	0.0419255	0.00249688	0.080167	0.00232693	0.00387443
Acyp1	0.0989433	0.125	0.0962733	0.105181	0.15929	0.0756254	0.173557
Acyp2	0.0816523	0.211538	0.13354	0.162921	0.2619	0.135544	0.256153
Ada	0.00864553	0.0192308	0.00698758	0.00124844	0.0173278	0	0.00149694
Adal	0.0134486	0.00961538	0.0100932	0.0193508	0.0194154	0.0255963	0.0719852
Adam10	0.182517	0.0769231	0.132764	0.0730337	0.171608	0.11402	0.173249
Adam11	0.0211335	0.0576923	0.0225155	0.0393258	0.0264092	0.0587551	0.189627
Adam12	0.000960615	0	0.0015528	0.00249688	0.00114823	0.0296684	0.00550346
Adam15	0.270893	0.0576923	0.225932	0.0571161	0.0881002	0.0605003	0.194074
Adam17	0.0931796	0.0384615	0.0636646	0.0324594	0.043737	0.0354857	0.0236869
Adam19	0.0067243	0.0192308	0.011646	0.00374532	0.0719207	0.0110529	0.0385242
Adam1a	0	0	0.000776398	0.00093633	0.00219207	0.000581734	0.00638401
Adam21	0	0	0	0.00093633	0.000417537	0.000581734	0.00272971
Adam22	0.0172911	0.0384615	0.0427019	0.0268414	0.0606472	0.0820244	0.32532
Adam23	0.0163305	0	0.0232919	0.0152934	0.0323591	0.0796975	0.247479
Adam28	0	0	0.000776398	0.00062422	0.000417537	0	0.00145291
Adam32	0.000960615	0	0	0.00031211	0.00135699	0.00232693	0.00316999
Adam33	0.0144092	0.00961538	0.0124224	0.0031211	0.00187891	0.000581734	0.0253599
Adam4	0.00288184	0	0.0015528	0.00093633	0.00104384	0	0.00356624
Adam8	0.00576369	0	0.00543478	0.00280899	0.00156576	0.0052356	0.0214415
Adam9	0.0566763	0.0769231	0.0520186	0.0162297	0.0941545	0.156486	0.0702241
Adamts1	0.260327	0.115385	0.361025	0.0102996	0.0263048	0.0831879	0.0129001
Adamts10	0.0115274	0.134615	0.0628882	0.0321473	0.00636743	0.0325771	0.0688152
Adamts12	0	0.0769231	0.0015528	0.00499376	0.000313152	0	0.00361027
Adamts15	0.000960615	0.0192308	0.0295031	0.00187266	0.00125261	0.00232693	0.0243033
Adamts16	0.00960615	0	0.00232919	0.00187266	0.000626305	0.000581734	0.0115352
Adamts17	0	0	0.00310559	0.00062422	0.000208768	0.0017452	0.0117114
Adamts18	0.000960615	0	0.00232919	0.00093633	0.000521921	0.000581734	0.0332849
Adamts19	0	0	0.0015528	0	0.000104384	0	0.00607582
Adamts2	0.0067243	0.0769231	0.0225155	0.0102996	0.025261	0.0104712	0.152776
Adamts20	0.00192123	0.00961538	0.00465839	0.0290262	0.0196242	0.00290867	0.014397
Adamts3	0	0	0	0	0.000104384	0.00407213	0.00330207
Adamts4	0.0115274	0.0288462	0.0209627	0.00405743	0.171399	0.00930774	0.00616387
Adamts5	0.00384246	0.0673077	0.0333851	0.0124844	0.00240084	0.0133799	0.0396249
Adamts6	0.0067243	0.0192308	0.00388199	0.00499376	0.00313152	0.008726	0.00818914
Adamts8	0	0	0.0279503	0.00031211	0.000313152	0.000581734	0.00805706
Adamts9	0.000960615	0.0192308	0.00776398	0.0259051	0.00177453	0.008726	0.00717651
Adamtsl1	0.00288184	0.00961538	0.0861801	0.00187266	0.0983299	0.00407213	0.043059
Adamtsl2	0.00576369	0.00961538	0.0194099	0.00967541	0.00334029	0.00232693	0.0263285
Adamtsl3	0	0.00961538	0	0.00031211	0.000626305	0.0104712	0.00233347
Adamtsl4	0.00384246	0.00961538	0.0333851	0.00249688	0.120877	0.00290867	0.00651609
Adamtsl5	0.00768492	0.0192308	0.060559	0.00780275	0.000939457	0.0017452	0.0046229
Adap1	0.054755	0.0961538	0.0481366	0.0318352	0.327557	0.0366492	0.193502
Adap2	0.392891	0.105769	0.23913	0.00249688	0.00146138	0.00116347	0.00189319
Adap2os	0.352546	0.0576923	0.215062	0.00124844	0.00167015	0.0017452	0.00154097
Adar	0.0557157	0.0480769	0.072205	0.0521223	0.0414405	0.0564282	0.303395
Adarb1	0.024976	0.00961538	0.048913	0.0234082	0.0153445	0.0255963	0.196936
Adarb2	0.00384246	0	0.011646	0.00749064	0.0065762	0.131472	0.103993
Adat1	0.0134486	0.00961538	0.015528	0.0168539	0.0131524	0.0122164	0.0615066
Adat2	0.00768492	0.00961538	0.00621118	0.00405743	0.0173278	0.0052356	0.0140008
Adck1	0.0461095	0.0192308	0.0326087	0.045568	0.0348643	0.0465387	0.0831242
Adck2	0.0422671	0.0480769	0.0520186	0.039638	0.0461378	0.0616638	0.107031
Adck5	0.0441883	0.00961538	0.0302795	0.022784	0.013048	0.045957	0.0957601
Adcy1	0.00288184	0.0384615	0.0139752	0.00967541	0.00563674	0.0197789	0.128253
Adcy10	0	0	0.00465839	0.00561798	0.0154489	0.0232693	0.0151455
Adcy2	0.0192123	0.0192308	0.0287267	0.0518102	0.0153445	0.0279232	0.272091
Adcy3	0.0240154	0.0288462	0.0287267	0.0218477	0.013048	0.0529378	0.170387
Adcy4	0.000960615	0	0.076087	0.00031211	0.000104384	0	0.000396249
Adcy5	0.0172911	0.144231	0.138199	0.0124844	0.112213	0.0314136	0.146876
Adcy6	0.0115274	0.00961538	0.103261	0.0165418	0.00887265	0.0157068	0.0719412
Adcy7	0.0653218	0.0192308	0.00465839	0.00218477	0.00240084	0.00290867	0.102981
Adcy8	0.00768492	0.0192308	0.0124224	0.0639825	0.00532359	0.0343223	0.0964646
Adcy9	0.0153698	0.0288462	0.0877329	0.0177903	0.0106472	0.0133799	0.0736142
Adcyap1	0.024976	0.0673077	0.0364907	0.0274657	0.0270355	0.0302501	0.353586
Adcyap1r1	0.0365034	0.0480769	0.0535714	0.27216	0.0296451	0.187318	0.231365
Add1	0.138329	0.153846	0.185559	0.133271	0.334656	0.137289	0.328138
Add2	0.0393852	0.0288462	0.0333851	0.0358926	0.0349687	0.0570099	0.32105
Add3	0.0816523	0.163462	0.122671	0.14201	0.191336	0.04363	0.081275
Adgb	0.00192123	0	0	0.00093633	0	0.00116347	0.00347818
Adgra1	0.0211335	0.0384615	0.0318323	0.224095	0.0384134	0.107039	0.276714
Adgra2	0.000960615	0.0576923	0.120342	0.00062422	0.000730689	0.00232693	0.0049311
Adgra3	0.0153698	0.00961538	0.0341615	0.0315231	0.00751566	0.0285049	0.0395809
Adgrb1	0.0307397	0.0865385	0.0504658	0.234395	0.0519833	0.137871	0.301149
Adgrb2	0.0201729	0.0480769	0.0364907	0.133271	0.0308977	0.0936591	0.250517
Adgrb3	0.0259366	0.0384615	0.0388199	0.191948	0.0338205	0.122746	0.304319
Adgrd1	0	0	0	0.00031211	0.000104384	0	0.00110069
Adgre1	0.361191	0	0.00310559	0.00249688	0.00219207	0.00290867	0.00409457
Adgre5	0.00768492	0.134615	0.128882	0.0224719	0.00313152	0.00465387	0.00515123
Adgrf4	0.000960615	0	0	0.00124844	0.00114823	0	0.0020693
Adgrf5	0.00192123	0.0961538	0.23059	0	0.000730689	0.00116347	0.00233347
Adgrg1	0.360231	0.0480769	0.104037	0.283084	0.0279749	0.130308	0.146964
Adgrg2	0.00288184	0.00961538	0.00465839	0.00249688	0.00876827	0.00290867	0.0486065
Adgrg3	0	0	0.00232919	0.00093633	0.000208768	0.000581734	0.000924581
Adgrg6	0	0.0192308	0.00310559	0.00062422	0.0213987	0	0.00162902
Adgrl1	0.049952	0.134615	0.156832	0.166355	0.035595	0.132635	0.529961
Adgrl2	0.0220941	0.00961538	0.0791925	0.0062422	0.00532359	0.008726	0.180513
Adgrl3	0.0413064	0.0480769	0.0737578	0.215356	0.0409186	0.238511	0.410118
Adgrl4	0.00192123	0	0.215062	0	0.000835073	0.00116347	0.00180513
Adgrv1	0.00288184	0.0384615	0.00698758	0.00280899	0.111482	0.00581734	0.00770484
Adh5	0.154659	0.134615	0.127329	0.0998752	0.208038	0.0936591	0.0792938
Adhfe1	0.00960615	0	0.00854037	0.0717853	0.0155532	0.0110529	0.0074847
Adi1	0.067243	0.0865385	0.052795	0.0415106	0.259395	0.0413031	0.0755074
Adipor1	0.335255	0.163462	0.284938	0.0827091	0.406785	0.10413	0.191388
Adipor2	0.054755	0.0384615	0.158385	0.0443196	0.369729	0.0407213	0.0889799
Adk	0.0787704	0.201923	0.138975	0.322722	0.235386	0.122746	0.113063
Adm	0.00768492	0.0865385	0.0333851	0.0230961	0.00146138	0.0401396	0.00378638
Adnp	0.00960615	0	0.00854037	0.00343321	0.00929019	0.0104712	0.0294545
Adnp2	0.0220941	0.00961538	0.0302795	0.0168539	0.0122129	0.0191972	0.0464932
Ado	0.092219	0.0961538	0.128882	0.0543071	0.588727	0.137289	0.0739665
Adora1	0.0345821	0.0384615	0.0403727	0.145131	0.221503	0.166376	0.135297
Adora2a	0.00288184	0.144231	0.0923913	0.00062422	0.000417537	0.000581734	0.00202527
Adora2b	0.0144092	0.134615	0.0263975	0.166667	0.00876827	0.0890052	0.0121076
Adora3	0.149856	0	0.00232919	0	0.000417537	0	0.000440276
Adpgk	0.0441883	0.0576923	0.0225155	0.028402	0.0320459	0.0285049	0.0932506
Adprh	0.26609	0.125	0.164596	0.162921	0.176618	0.227458	0.285783
Adprhl1	0.000960615	0	0	0.00062422	0.00167015	0	0.000880553
Adprhl2	0.0710855	0.0769231	0.0854037	0.0702247	0.0947808	0.0977312	0.138335
Adprm	0.0461095	0.00961538	0.0543478	0.039638	0.0382046	0.0401396	0.0936028
Adra1a	0.000960615	0	0.00465839	0.0177903	0.000939457	0.0232693	0.0272531
Adra1b	0.00576369	0.0384615	0.0147516	0.031211	0.0268267	0.0389761	0.10254
Adra2a	0.00576369	0.0288462	0.0170807	0.0883271	0.00730689	0.00465387	0.0746709
Adra2c	0.0067243	0.00961538	0.0108696	0.00530587	0.0045929	0.0116347	0.0552107
Adrb1	0.115274	0.0192308	0.00465839	0.0380774	0.00271399	0.0069808	0.0360146
Adrb2	0.371758	0	0.056677	0.00187266	0.00146138	0.00232693	0.00774887
Adrb3	0.00384246	0.00961538	0	0.00062422	0.00104384	0.00116347	0.0186677
Adrm1	0.220941	0.125	0.208075	0.105493	0.217015	0.10413	0.193149
Adsl	0.0605187	0.0480769	0.0776398	0.0333958	0.0471816	0.0366492	0.104698
Adss	0.0951009	0.125	0.111801	0.07397	0.0854906	0.0663176	0.241844
Adssl1	0.0835735	0.0384615	0.0690994	0.0205993	0.445407	0.0209424	0.0862502
Aebp1	0.00288184	0.0961538	0.0209627	0.00530587	0.0650313	0.0616638	0.00616387
Aebp2	0.049952	0.0961538	0.100932	0.0324594	0.0803758	0.0413031	0.139392
Aen	0.0470701	0.0480769	0.0698758	0.0642946	0.0519833	0.0424666	0.107516
Aes	0.506244	0.615385	0.611025	0.512484	0.767432	0.696335	0.751024
AF529169	0.00864553	0.00961538	0.0124224	0.00530587	0.00490605	0.00930774	0.0897724
Afap1	0.0201729	0.173077	0.125776	0.0461923	0.0781837	0.0552647	0.0663497
Afap1l1	0.0451489	0.0192308	0.168478	0.00436954	0.0691023	0.00930774	0.0147933
Afap1l2	0.00768492	0.0192308	0.104814	0.0287141	0.0039666	0.107621	0.00673623
Afdn	0.0326609	0.153846	0.190994	0.0696005	0.127349	0.072135	0.266279
Aff1	0.0451489	0.0192308	0.0551242	0.0212235	0.0147182	0.00581734	0.009554
Aff2	0.00384246	0.00961538	0.0100932	0.00717853	0.00636743	0.0157068	0.0625193
Aff3	0.0153698	0.0384615	0.0163043	0.0121723	0.0234864	0.0145433	0.108792
Aff4	0.0989433	0.115385	0.149068	0.0967541	0.140919	0.111693	0.335447
Afg1l	0.0115274	0	0.0225155	0.0149813	0.0143006	0.0145433	0.0550786
Afg3l1	0.0730067	0.0576923	0.0784161	0.0686642	0.127975	0.105294	0.159732
Afg3l2	0.0509126	0.0192308	0.052795	0.0355805	0.0364301	0.0471204	0.174878
Afmid	0.00576369	0	0.000776398	0.00124844	0.000417537	0.000581734	0.00959803
Afp	0.0172911	0	0	0	0.000104384	0	0.000880553
Aftph	0.122959	0.105769	0.100932	0.0365169	0.0693111	0.04363	0.16594
Aga	0.104707	0.0961538	0.0364907	0.0627341	0.075261	0.0296684	0.0297627
Agap1	0.0461095	0.0961538	0.113354	0.0574282	0.287578	0.143106	0.256285
Agap2	0.00480307	0	0.00465839	0.00249688	0.00240084	0.008726	0.0309955
Agap3	0.0739673	0.0384615	0.107143	0.0702247	0.105428	0.0826062	0.329679
Agbl2	0.000960615	0	0	0.00343321	0.000939457	0.0017452	0.00431471
Agbl3	0.0153698	0.0192308	0.0124224	0.028402	0.0298539	0.0180337	0.0395368
Agbl4	0.00384246	0	0.00388199	0.0031211	0.00271399	0.0034904	0.0392727
Agbl5	0.00384246	0	0.0124224	0.00593009	0.00521921	0.0139616	0.036631
Ager	0.00288184	0.00961538	0.0163043	0.00218477	0.000521921	0	0.00220138
Agfg1	0.06244	0.0673077	0.124224	0.0427591	0.0943633	0.0913322	0.178312
Agfg2	0.0537944	0.0576923	0.0434783	0.0630462	0.0542797	0.0447935	0.15238
Aggf1	0.114313	0.0769231	0.104037	0.0649189	0.14572	0.0639907	0.157135
Agk	0.0336215	0.0192308	0.048913	0.0318352	0.039666	0.045957	0.178048
Agl	0.0441883	0.0769231	0.0628882	0.154494	0.0455115	0.0645724	0.135253
Agmat	0.00288184	0.00961538	0.0015528	0.00280899	0.0019833	0.00290867	0.0202967
Agmo	0.126801	0.0384615	0.0225155	0.0321473	0.0495825	0.0116347	0.00391846
Ago1	0.0470701	0.0384615	0.0450311	0.0337079	0.0635699	0.0354857	0.122617
Ago2	0.0758886	0.0769231	0.121118	0.0655431	0.0422756	0.0663176	0.227579
Ago3	0.0489914	0.0769231	0.048913	0.0552434	0.111065	0.0750436	0.144235
Ago4	0.0268972	0.0288462	0.0170807	0.0162297	0.0126305	0.0389761	0.0769603
Agpat1	0.0365034	0.0384615	0.0427019	0.0418227	0.0487474	0.045957	0.155858
Agpat2	0.0960615	0.0384615	0.048913	0.00530587	0.00219207	0.008726	0.020649
Agpat3	0.12488	0.173077	0.139752	0.155743	0.237683	0.107039	0.2171
Agpat4	0.0566763	0.307692	0.111801	0.0465044	0.703653	0.21815	0.237441
Agpat5	0.0931796	0.115385	0.0993789	0.42166	0.145825	0.312973	0.167173
Agps	0.0662824	0	0.0302795	0.0240325	0.0753653	0.0296684	0.079602
Agrn	0.0240154	0.0865385	0.184006	0.0630462	0.0298539	0.095986	0.148813
Agrp	0	0.00961538	0.000776398	0.00124844	0.000313152	0.00116347	0.00713248
Agt	0.0902978	0.125	0.0799689	0.825843	0.0771399	0.0395579	0.0671422
Agtpbp1	0.0432277	0.0480769	0.0815217	0.045568	0.100418	0.0622455	0.225201
Agtr1a	0	0	0.000776398	0.00031211	0.000313152	0.000581734	0.00779289
Agtr2	0	0	0.0015528	0.00124844	0.000417537	0	0.0165984
Agtrap	0.0326609	0.0961538	0.060559	0.0436954	0.00824635	0.00756254	0.0468014
Ahctf1	0.024976	0.0673077	0.0838509	0.0337079	0.0496868	0.0337405	0.118522
Ahcy	0.0067243	0.00961538	0.00854037	0.00249688	0.014405	0.00814427	0.0327566
Ahcyl1	0.0826129	0.125	0.192547	0.351436	0.14572	0.08726	0.217276
Ahcyl2	0.0710855	0.0576923	0.0807453	0.176966	0.0900835	0.072135	0.24585
Ahdc1	0.0518732	0.134615	0.104814	0.0780275	0.0286013	0.0482839	0.170211
Ahi1	0.569645	0.903846	0.732143	0.905119	0.612944	0.95637	0.965702
Ahnak	0.0268972	0.211538	0.473602	0.00530587	0.00146138	0.000581734	0.00422665
Ahnak2	0.0384246	0.0769231	0.0326087	0.0358926	0.0391441	0.0325771	0.0451724
Ahr	0.00576369	0.00961538	0.011646	0.00124844	0.00135699	0.0017452	0.0431911
Ahsa1	0.276657	0.173077	0.246118	0.168539	0.389353	0.20477	0.310439
Ahsa2	0.0912584	0.0480769	0.0854037	0.0480649	0.129332	0.0657359	0.143882
AI115009	0	0	0.000776398	0.00031211	0.000208768	0.000581734	0.00303791
AI182371	0.000960615	0	0.000776398	0.00218477	0.0019833	0.000581734	0.000616387
AI197445	0.000960615	0	0.000776398	0.00031211	0.00281837	0.00116347	0.00149694
AI314180	0.0557157	0.0480769	0.0636646	0.0646067	0.05	0.072135	0.201779
AI413582	0.323727	0.192308	0.184783	0.261548	0.453653	0.183246	0.518205
AI429214	0.000960615	0.0192308	0.0015528	0.00156055	0.00156576	0.000581734	0.00321402
AI464131	0.0144092	0.0384615	0.00854037	0.213171	0.0165971	0.0151251	0.0148373
AI467606	0.0557157	0	0.0822981	0.00124844	0.00135699	0.00116347	0.0339453
AI480526	0.024976	0.0192308	0.0380435	0.0755306	0.0302714	0.0221059	0.117774
AI504432	0.0220941	0.0192308	0.0201863	0.0127965	0.0200418	0.0267597	0.273192
AI593442	0.0413064	0.0769231	0.0652174	0.051186	0.0384134	0.0994764	0.485801
AI597479	0.0297791	0.0384615	0.0372671	0.0224719	0.0462422	0.0221059	0.107471
AI606181	0.00384246	0	0.00931677	0.00499376	0.00699374	0.00756254	0.0166425
AI661453	0.000960615	0	0.00931677	0	0.000208768	0	0.00105666
AI837181	0.106628	0.0673077	0.118789	0.0502497	0.0949896	0.0732984	0.177872
AI839979	0.00192123	0	0.000776398	0.00187266	0.000417537	0.000581734	0.00567957
AI847159	0	0	0	0	0.000104384	0.000581734	0.00132083
AI849053	0.00576369	0	0.000776398	0.0465044	0.00386221	0.0139616	0.00532735
AI854703	0.0115274	0.0480769	0.0194099	0.0162297	0.014405	0.0279232	0.121736
AI987944	0.0393852	0.0192308	0.0248447	0.0202871	0.0443633	0.0279232	0.052481
Aida	0.0730067	0.0576923	0.117236	0.0699126	0.0816284	0.0511926	0.243649
Aif1	0.837656	0	0.011646	0.00905119	0.00991649	0.008726	0.0154097
Aif1l	0.00960615	0.00961538	0.0970497	0.0093633	0.156263	0.0116347	0.00651609
Aifm1	0.0220941	0.0192308	0.0450311	0.0418227	0.0373695	0.0651542	0.105182
Aifm2	0.00384246	0.0192308	0.0178571	0.0162297	0.0150313	0.0133799	0.0395368
Aifm3	0.0163305	0.0384615	0.0248447	0.172597	0.0185804	0.0069808	0.0818034
Aig1	0.105668	0.0480769	0.117236	0.137016	0.434342	0.179756	0.279223
Aim2	0.0989433	0	0.00698758	0.00031211	0.00929019	0.00116347	0.00607582
Aimp1	0.217099	0.259615	0.254658	0.1598	0.28904	0.208261	0.313345
Aimp2	0.0691643	0.0769231	0.0690994	0.0499376	0.0948852	0.0599186	0.102408
Aip	0.229587	0.230769	0.197205	0.131086	0.260543	0.126236	0.380223
Airn	0	0	0.0357143	0.00187266	0.00187891	0.0069808	0.0219258
Ajap1	0.0163305	0.0384615	0.0659938	0.0115481	0.00981211	0.052356	0.229164
Ajuba	0.00768492	0.0192308	0.0543478	0.00124844	0.000626305	0	0.000308194
Ak1	0.207493	0.0961538	0.121894	0.168539	0.154489	0.0919139	0.311011
AK157302	0.00288184	0.00961538	0.00854037	0.0031211	0.00480167	0.00290867	0.0245234
Ak2	0.121998	0.0769231	0.0745342	0.0877029	0.118476	0.0645724	0.118126
Ak3	0.0605187	0.163462	0.177795	0.0933208	0.320877	0.054683	0.06045
Ak4	0.00864553	0.0288462	0.0263975	0.0461923	0.00960334	0.0116347	0.0942632
Ak5	0.012488	0.0288462	0.015528	0.0127965	0.0196242	0.0325771	0.116849
Ak6	0.0739673	0.0769231	0.0900621	0.0536829	0.0812109	0.0605003	0.152116
Ak7	0	0	0.0015528	0	0.000521921	0	0.00259763
Ak8	0.00288184	0	0.000776398	0.00062422	0.000835073	0.00116347	0.00629595
Akain1	0.0067243	0	0.00854037	0.00468165	0.00668058	0.0052356	0.0427949
Akap1	0.00960615	0.0192308	0.048913	0.0165418	0.022547	0.0296684	0.0647206
Akap10	0.0211335	0.0480769	0.0271739	0.0124844	0.0185804	0.0221059	0.0463611
Akap11	0.0893372	0.125	0.146739	0.119226	0.151461	0.0954043	0.455642
Akap12	0.0345821	0.211538	0.256988	0.0290262	0.0257829	0.0581734	0.126051
Akap13	0.337176	0.144231	0.180124	0.0411985	0.0113779	0.0814427	0.0630036
Akap17b	0.012488	0.0384615	0.0411491	0.0343321	0.0248434	0.0325771	0.128517
Akap2	0.0067243	0.0769231	0.215062	0.00811486	0.0226514	0.00290867	0.0177431
Akap5	0.0105668	0	0.00465839	0.0062422	0.00501044	0.0110529	0.0584247
Akap6	0.0393852	0.0673077	0.0799689	0.0605493	0.0704593	0.0541012	0.289482
Akap7	0.0441883	0.230769	0.126553	0.0636704	0.0885177	0.0948226	0.180205
Akap8	0.100865	0.0480769	0.118789	0.0814607	0.0731733	0.0715532	0.163651
Akap8l	0.163305	0.153846	0.150621	0.12578	0.133612	0.13438	0.304275
Akap9	0.190202	0.346154	0.292702	0.266854	0.300418	0.262362	0.471492
Akip1	0.0451489	0.0384615	0.0799689	0.0149813	0.0262004	0.0122164	0.0220138
Akirin1	0.238232	0.125	0.149845	0.110487	0.235177	0.130308	0.20737
Akirin2	0.29683	0.240385	0.188665	0.137328	0.255637	0.128563	0.238894
Akna	0.0576369	0.00961538	0.0139752	0.00156055	0.000417537	0.00407213	0.0012768
Akr1a1	0.660903	0.663462	0.628882	0.401998	0.606159	0.556719	0.709506
Akr1b10	0.193084	0.0673077	0.0450311	0.161049	0.0147182	0.0663176	0.0886277
Akr1b3	0.262248	0.144231	0.124224	0.0527466	0.177453	0.0744619	0.131775
Akr1b7	0	0	0	0.00031211	0.000521921	0.000581734	0.00237749
Akr1b8	0	0.00961538	0.00931677	0.00405743	0.000730689	0	0.001585
Akr1c14	0	0	0.0481366	0	0.000104384	0.000581734	0.000176111
Akr1cl	0	0	0	0	0.000208768	0	0.00405054
Akr1e1	0.0451489	0.0288462	0.0411491	0.0468165	0.0744259	0.0605003	0.0657773
Akr7a5	0.142171	0.115385	0.101708	0.100187	0.266388	0.10064	0.147581
Akt1	0.210375	0.115385	0.163043	0.0574282	0.0835073	0.080861	0.20671
Akt1s1	0.142171	0.0769231	0.149068	0.0983146	0.242484	0.105876	0.16572
Akt2	0.0634006	0.0576923	0.0791925	0.0461923	0.0676409	0.0552647	0.0704002
Akt3	0.0163305	0.0480769	0.0621118	0.0215356	0.0222338	0.0232693	0.10822
Aktip	0.164265	0.182692	0.229814	0.140762	0.359916	0.161722	0.466517
AL589670.1	0.000960615	0.0288462	0.00854037	0.0202871	0.00177453	0.0139616	0.00545943
AL589692.1	0.000960615	0	0.00543478	0.00530587	0.00417537	0.00116347	0.0105226
AL590144.2	0.0528338	0.00961538	0.00776398	0.00124844	0.000730689	0.00232693	0.00427068
AL591952.3	0.0163305	0.00961538	0.0147516	0.00686642	0.0127349	0.00407213	0.0214415
AL603867.1	0	0	0	0	0.000208768	0.000581734	0.00409457
AL732309.1	0	0	0.0015528	0	0.00135699	0	0.00180513
AL732506.1	0	0	0.000776398	0.00093633	0.00177453	0.000581734	0.0123277
Alad	0.049952	0.105769	0.0877329	0.0599251	0.0807933	0.0942408	0.126403
Alas1	0.0989433	0.0384615	0.159938	0.0449438	0.0511482	0.0314136	0.0858099
Alcam	0.0595581	0.0865385	0.0776398	0.238764	0.110856	0.311809	0.52481
Aldh16a1	0.0403458	0.00961538	0.0178571	0.00499376	0.0193111	0.00465387	0.0180073
Aldh18a1	0.0153698	0	0.0186335	0.00561798	0.00480167	0.0319953	0.0440717
Aldh1a1	0.0230548	0.394231	0.0310559	0.170724	0.0390397	0.0302501	0.0229384
Aldh1a2	0.00192123	0.173077	0.00388199	0.00124844	0.000626305	0.000581734	0.0121957
Aldh1a3	0.00480307	0.0288462	0.011646	0.0221598	0.0134656	0.00756254	0.0287501
Aldh1b1	0.00384246	0.00961538	0.000776398	0.00218477	0.00146138	0.0127981	0.0284859
Aldh1l1	0.0163305	0.00961538	0.015528	0.156367	0.0134656	0.0104712	0.0174349
Aldh1l2	0.00864553	0	0.00931677	0.00187266	0.0126305	0.0162885	0.0145732
Aldh2	0.180596	0.384615	0.354814	0.220974	0.0926931	0.14427	0.128693
Aldh3a2	0.0566763	0.0865385	0.0496894	0.0271536	0.0624217	0.0354857	0.0655572
Aldh3b1	0.0634006	0.0288462	0.0209627	0.00905119	0.0541754	0.00756254	0.00559151
Aldh3b2	0.0067243	0.0192308	0.0139752	0.0121723	0.0319415	0.0069808	0.0974772
Aldh4a1	0.0153698	0.0384615	0.0434783	0.03402	0.0257829	0.0203607	0.0433232
Aldh5a1	0.0144092	0.0192308	0.0333851	0.0655431	0.0335073	0.0407213	0.168098
Aldh6a1	0.0403458	0.115385	0.0613354	0.125156	0.170772	0.0599186	0.073218
Aldh7a1	0.0643612	0.173077	0.0815217	0.131398	0.0723382	0.0750436	0.0931185
Aldh8a1	0	0	0.0015528	0	0.000104384	0	0.00352221
Aldh9a1	0.0691643	0.0480769	0.0512422	0.0521223	0.0797495	0.0325771	0.0656893
Aldoa	0.848223	0.971154	0.912267	0.962547	0.919102	0.954043	0.93638
Aldob	0	0	0	0.00031211	0.000835073	0.0017452	0.0123718
Aldoc	0.539866	0.567308	0.456522	0.966916	0.553445	0.719023	0.497292
Alg1	0.106628	0.0384615	0.0830745	0.071161	0.0625261	0.0663176	0.103993
Alg10b	0.0211335	0.0769231	0.0295031	0.0246567	0.0192067	0.0267597	0.0997667
Alg11	0.0336215	0.00961538	0.0279503	0.0405743	0.0465553	0.0424666	0.187073
Alg12	0.0182517	0.0192308	0.0178571	0.0202871	0.0147182	0.0186155	0.0387443
Alg13	0.00768492	0	0.0108696	0.00998752	0.0237996	0.0110529	0.0299828
Alg14	0.054755	0.0576923	0.103261	0.0302747	0.116597	0.0447935	0.0878792
Alg2	0.0278578	0.0288462	0.0652174	0.0983146	0.0640919	0.123909	0.45802
Alg3	0.0537944	0.0673077	0.0271739	0.0446317	0.032881	0.0465387	0.0435874
Alg5	0.15562	0.0673077	0.076087	0.100187	0.100626	0.114602	0.128561
Alg6	0.0182517	0.0192308	0.0225155	0.0302747	0.0264092	0.0383944	0.0734381
Alg8	0.0365034	0	0.00854037	0.00811486	0.0133612	0.0168703	0.0229384
Alg9	0.0441883	0.0288462	0.0318323	0.0230961	0.0344468	0.0290867	0.062167
Alk	0	0	0.0015528	0.00062422	0.000417537	0.0017452	0.00973011
Alkal2	0.000960615	0	0.00232919	0.00031211	0.000208768	0	0.00625193
Alkbh1	0.0902978	0.105769	0.0706522	0.0839576	0.0862213	0.0965678	0.210848
Alkbh2	0.0393852	0.0480769	0.0411491	0.0159176	0.0159708	0.0162885	0.079602
Alkbh3	0.0682037	0.0480769	0.048913	0.0371411	0.0447808	0.0244328	0.0518205
Alkbh4	0.0201729	0	0.0131988	0.00998752	0.0149269	0.0151251	0.0227623
Alkbh5	0.143132	0.230769	0.246118	0.130774	0.27119	0.155323	0.23229
Alkbh6	0.0979827	0.0576923	0.113354	0.0961298	0.14499	0.10064	0.243253
Alkbh7	0.092219	0.211538	0.103261	0.111423	0.12547	0.0814427	0.217761
Alkbh8	0.0259366	0.0576923	0.0543478	0.036829	0.0419624	0.0506108	0.167305
Alms1	0.0067243	0.00961538	0.011646	0.0271536	0.00427975	0.0226876	0.0632237
Alox12	0	0	0.0147516	0	0	0	0.000176111
Alox5	0.0585975	0	0	0.00031211	0.000313152	0.000581734	0.000308194
Alox5ap	0.626321	0	0.00931677	0.00561798	0.00480167	0.00988947	0.041386
Alox8	0.00288184	0	0.00310559	0.00343321	0.00250522	0.00116347	0.0214415
Aloxe3	0.000960615	0.00961538	0.00465839	0.00249688	0.00167015	0.00290867	0.0385682
Alpk1	0.00192123	0	0.00621118	0.00561798	0.000208768	0	0.000528332
Alpk2	0	0	0.000776398	0.00031211	0	0	0.00215735
Alpl	0.00384246	0.0288462	0.0667702	0.0546192	0.00438413	0.0122164	0.0041386
Als2	0.00384246	0	0.00931677	0.00905119	0.0134656	0.00930774	0.0412979
Als2cl	0.00768492	0.00961538	0.0271739	0.0558677	0.00469729	0.0133799	0.0166865
Alyref	0.195005	0.105769	0.184006	0.101436	0.291545	0.0948226	0.174349
Alyref2	0.0768492	0.0769231	0.0411491	0.0343321	0.0365344	0.0506108	0.092414
Amacr	0.0220941	0.0384615	0.0271739	0.0265293	0.0189979	0.0255963	0.0434993
Ambra1	0.0326609	0.0673077	0.0403727	0.0327715	0.027453	0.0267597	0.0902567
Amd1	0.0336215	0.0288462	0.0729814	0.0452559	0.173173	0.0506108	0.0950117
Amd2	0.0105668	0.0384615	0.0318323	0.0109238	0.0387265	0.0145433	0.0543741
Amdhd2	0.0682037	0.0673077	0.0613354	0.0362047	0.090501	0.0395579	0.108924
Amer1	0.024976	0.0192308	0.0535714	0.0433833	0.0334029	0.0442118	0.071589
Amer2	0.0432277	0.0288462	0.0395963	0.130462	0.239144	0.131472	0.235724
Amer3	0.00768492	0.00961538	0.00931677	0.0031211	0.00271399	0.00290867	0.0519526
Amfr	0.17195	0.0961538	0.170031	0.112984	0.164301	0.129727	0.244089
Amh	0.000960615	0	0	0.00093633	0.000417537	0.00232693	0.00475499
Amhr2	0.00192123	0	0.00232919	0.00468165	0.00114823	0.000581734	0.0131643
Amigo1	0.0220941	0	0.0287267	0.0302747	0.014405	0.0151251	0.150839
Amigo2	0.00960615	0.0192308	0.0815217	0.0240325	0.00626305	0.00639907	0.159204
Amigo3	0.0115274	0.00961538	0.00388199	0.0031211	0.00313152	0.0017452	0.00581165
Ammecr1	0.00864553	0.00961538	0.0194099	0.00842697	0.0126305	0.0250145	0.0449522
Ammecr1l	0.0509126	0.0865385	0.0753106	0.0636704	0.0502088	0.0541012	0.12724
Amn	0.0182517	0.0192308	0.0131988	0.0187266	0.0172234	0.017452	0.173557
Amn1	0.0528338	0.0480769	0.0737578	0.0939451	0.175887	0.0709715	0.198212
Amot	0.00384246	0.00961538	0.0333851	0.0383895	0.0045929	0.00639907	0.0142209
Amotl1	0.0461095	0.192308	0.215062	0.0705368	0.02119	0.0686446	0.219346
Amotl2	0.0115274	0.182692	0.158385	0.0271536	0.111795	0.0651542	0.0611544
Ampd2	0.0336215	0.0576923	0.0574534	0.0705368	0.02881	0.0395579	0.17862
Ampd3	0.0134486	0.0288462	0.0232919	0.0436954	0.00636743	0.122164	0.0584687
Amph	0.0643612	0.0192308	0.0838509	0.0724095	0.125157	0.0849331	0.325232
Amt	0.0172911	0.0480769	0.0341615	0.0783396	0.0317328	0.0430483	0.0814071
Amy1	0.00864553	0.0192308	0.00776398	0.0243446	0.0118998	0.008726	0.0823317
Amz1	0.0893372	0.0288462	0.0131988	0.0134207	0.0091858	0.160558	0.0550786
Amz2	0.0634006	0.0865385	0.0861801	0.0549313	0.100939	0.0395579	0.144983
Anapc1	0.0413064	0.0384615	0.0791925	0.0536829	0.056263	0.0581734	0.137983
Anapc10	0.054755	0.0480769	0.0698758	0.0411985	0.0537578	0.0628272	0.100251
Anapc11	0.428434	0.490385	0.536491	0.346442	0.729019	0.418266	0.632986
Anapc13	0.428434	0.365385	0.411491	0.299625	0.479019	0.248982	0.359134
Anapc15	0.0739673	0	0.0613354	0.0308989	0.0551148	0.0354857	0.124862
Anapc16	0.165226	0.221154	0.240683	0.180712	0.339144	0.138453	0.207194
Anapc2	0.0979827	0.0576923	0.0892857	0.0639825	0.124008	0.0663176	0.153128
Anapc4	0.0653218	0.0480769	0.0597826	0.0374532	0.0451983	0.0418848	0.149386
Anapc5	0.206532	0.173077	0.271739	0.117353	0.264614	0.166958	0.348435
Anapc7	0.0662824	0.0480769	0.0784161	0.0343321	0.0607516	0.0616638	0.114252
Ang	0.352546	0.0480769	0.0186335	0.00374532	0.00208768	0.00116347	0.00660415
Angel1	0.00768492	0	0.0100932	0.0140449	0.0102296	0.0110529	0.0211773
Angel2	0.0999039	0.115385	0.123447	0.0933208	0.128601	0.0919139	0.195131
Angpt1	0.000960615	0.00961538	0.0357143	0.0159176	0.00167015	0.0180337	0.022234
Angpt2	0	0.0576923	0.0434783	0.00093633	0.000835073	0.00232693	0.00519526
Angptl1	0.00288184	0	0.00310559	0.00468165	0.000417537	0.0465387	0.001585
Angptl2	0.000960615	0.134615	0.0450311	0.00218477	0.000626305	0.0017452	0.00290582
Angptl4	0.00576369	0.211538	0.0388199	0.0617978	0.00375783	0.00116347	0.00686831
Angptl6	0.0422671	0.0192308	0.0364907	0.0418227	0.0843424	0.0622455	0.13402
Angptl7	0.00480307	0	0.000776398	0.00031211	0.000521921	0	0.00374235
Ank	0.0768492	0.105769	0.0768634	0.13015	0.420877	0.072135	0.182142
Ank1	0.00576369	0	0.0124224	0.0106117	0.00751566	0.0162885	0.112006
Ank2	0.227666	0.480769	0.322205	0.691323	0.806785	0.629436	0.754282
Ank3	0.0720461	0.105769	0.0900621	0.0614856	0.463257	0.19139	0.541628
Ankdd1a	0.000960615	0	0.0015528	0.00031211	0.000104384	0	0.00532735
Ankdd1b	0	0	0.00232919	0.00093633	0.000626305	0.00116347	0.00136486
Ankef1	0.00288184	0	0.00465839	0.00280899	0.000313152	0.000581734	0.0330648
Ankfn1	0	0	0	0.00093633	0	0.000581734	0.00176111
Ankfy1	0.0710855	0.0480769	0.072205	0.0480649	0.0660752	0.0471204	0.114956
Ankhd1	0.0605187	0.125	0.0885093	0.0611735	0.0679541	0.0506108	0.119711
Ankib1	0.0384246	0.0865385	0.0543478	0.03402	0.17881	0.0488656	0.115485
Ankle1	0	0	0	0.00031211	0.000104384	0.0034904	0.00110069
Ankle2	0.0730067	0.0673077	0.0652174	0.0593009	0.0442589	0.061082	0.0999428
Ankmy1	0.00192123	0	0.000776398	0.00124844	0.00104384	0	0.00361027
Ankmy2	0.0432277	0.0384615	0.0582298	0.0352684	0.0330898	0.0418848	0.138951
Ankra2	0.127762	0.125	0.131211	0.148252	0.240605	0.183246	0.29045
Ankrd1	0	0	0.000776398	0.00093633	0.000208768	0.000581734	0.00180513
Ankrd10	0.114313	0.134615	0.120342	0.071161	0.064405	0.0890052	0.200502
Ankrd11	0.384246	0.326923	0.373447	0.268727	0.409603	0.549156	0.468718
Ankrd12	0.169068	0.211538	0.27795	0.202871	0.283716	0.265271	0.442698
Ankrd13a	0.136407	0.0288462	0.122671	0.0131086	0.16096	0.0238511	0.0569718
Ankrd13b	0.012488	0.0192308	0.0163043	0.0146692	0.0521921	0.0127981	0.0964206
Ankrd13c	0.054755	0.0288462	0.072205	0.0502497	0.0768267	0.0570099	0.146128
Ankrd13d	0.0326609	0.00961538	0.0271739	0.0343321	0.0256785	0.0290867	0.165104
Ankrd16	0.0326609	0.0480769	0.0310559	0.0480649	0.0249478	0.0296684	0.0850614
Ankrd17	0.128722	0.201923	0.123447	0.107054	0.109395	0.136707	0.34773
Ankrd2	0.000960615	0	0	0.00249688	0.00344468	0.0017452	0.0224981
Ankrd23	0.00192123	0	0.0015528	0.00124844	0.00313152	0.00116347	0.00374235
Ankrd24	0.0470701	0.0384615	0.0504658	0.0571161	0.0708768	0.0453752	0.207414
Ankrd26	0.0403458	0.0576923	0.0675466	0.0458801	0.0908142	0.0517743	0.14397
Ankrd27	0.0297791	0.0480769	0.0395963	0.0202871	0.0298539	0.0238511	0.0486946
Ankrd28	0.0192123	0.0192308	0.0341615	0.0205993	0.16263	0.0767888	0.0500154
Ankrd29	0.00768492	0	0.0240683	0.00717853	0.00636743	0.0197789	0.06362
Ankrd33b	0.00192123	0.00961538	0.0333851	0.00156055	0.000521921	0.000581734	0.017479
Ankrd34a	0.0134486	0	0.0170807	0.0106117	0.0132568	0.0116347	0.12178
Ankrd34b	0.00960615	0	0.0232919	0.0124844	0.0123173	0.0162885	0.136222
Ankrd34c	0.00288184	0	0.00543478	0.00593009	0.00323591	0.00465387	0.0549025
Ankrd35	0.00288184	0.0288462	0.00776398	0.0168539	0.00699374	0.0127981	0.0353102
Ankrd37	0.0192123	0	0.0737578	0.0274657	0.0365344	0.0244328	0.125479
Ankrd39	0.0393852	0.0576923	0.0815217	0.0424469	0.104071	0.0552647	0.137454
Ankrd40	0.10951	0.0673077	0.149845	0.099563	0.232881	0.054683	0.113811
Ankrd42	0.00480307	0.00961538	0.00776398	0.0062422	0.00521921	0.008726	0.0514243
Ankrd44	0.186359	0.0673077	0.0698758	0.00967541	0.0343424	0.0686446	0.113811
Ankrd45	0.00288184	0.0192308	0.0124224	0.00561798	0.00532359	0.0052356	0.0689033
Ankrd46	0.0931796	0.144231	0.138975	0.101748	0.208038	0.133217	0.281161
Ankrd49	0.0489914	0.0673077	0.0357143	0.0371411	0.0680585	0.0343223	0.0834764
Ankrd50	0.0240154	0.0769231	0.100155	0.0152934	0.0168058	0.0168703	0.102981
Ankrd52	0.00960615	0	0.0015528	0.00468165	0.00730689	0.0052356	0.0152776
Ankrd54	0.0518732	0.0769231	0.0628882	0.0471286	0.0638831	0.045957	0.119843
Ankrd55	0.0067243	0.00961538	0.00543478	0.00468165	0.00407098	0.00232693	0.0991503
Ankrd6	0.0067243	0.0192308	0.0225155	0.0165418	0.011691	0.0302501	0.131863
Ankrd66	0.00192123	0	0.000776398	0.00749064	0.000730689	0.000581734	0.00118875
Ankrd9	0.024976	0.0673077	0.0473602	0.0465044	0.0326722	0.0273415	0.095496
Anks1	0.0317003	0	0.0621118	0.0649189	0.0296451	0.0104712	0.0361907
Anks1b	0.0691643	0.0865385	0.068323	0.0674157	0.40428	0.321117	0.37538
Anks3	0.067243	0.0576923	0.0652174	0.0727216	0.0659708	0.0570099	0.149166
Anks6	0.00576369	0	0.00931677	0.00374532	0.00542797	0.00756254	0.0161581
Ankub1	0.00288184	0.0192308	0.00854037	0.00124844	0.145616	0.0017452	0.00325805
Ankzf1	0.0422671	0.0480769	0.0458075	0.0424469	0.0373695	0.0273415	0.0980496
Anln	0.0278578	0.0384615	0.0419255	0.0127965	0.509812	0.0151251	0.0166425
Ano1	0.00480307	0	0.152174	0.00218477	0.00187891	0.00116347	0.00722053
Ano10	0.024976	0.0480769	0.0559006	0.0280899	0.0496868	0.0308319	0.0532735
Ano2	0	0	0	0.00031211	0.000208768	0.0017452	0.00457888
Ano3	0.00384246	0.00961538	0.00854037	0.00218477	0.00125261	0.0145433	0.0630036
Ano4	0.00864553	0.0192308	0.0232919	0.00499376	0.109081	0.0191972	0.0422225
Ano5	0.000960615	0	0.000776398	0.00093633	0.000208768	0.0017452	0.00986219
Ano6	0.0441883	0.0673077	0.128882	0.0499376	0.00427975	0.0447935	0.0867345
Ano7	0.00288184	0	0.000776398	0.00062422	0.000835073	0	0.0147052
Ano8	0.0153698	0.0192308	0.0170807	0.019975	0.0217119	0.0180337	0.0942632
Anp32a	0.428434	0.192308	0.436335	0.246567	0.258038	0.200116	0.336283
Anp32b	0.262248	0.182692	0.359472	0.108614	0.322756	0.179756	0.197948
Anp32e	0.169068	0.125	0.174689	0.0945693	0.145407	0.124491	0.157575
Anpep	0.000960615	0.0384615	0.052795	0	0.000417537	0	0.000220138
Antxr1	0.00768492	0.0192308	0.0163043	0.0452559	0.0115866	0.0372309	0.0266808
Antxr2	0.00288184	0.0576923	0.00931677	0.00280899	0.000104384	0.00290867	0.000704442
Anxa11	0.0528338	0.0384615	0.118789	0.0102996	0.00438413	0.00290867	0.0133844
Anxa2	0.0643612	0.403846	0.305901	0.0583645	0.0620042	0.0692263	0.0622991
Anxa3	0.6244	0.0288462	0.318323	0.00811486	0.00751566	0.00407213	0.0138247
Anxa4	0.0441883	0.00961538	0.0395963	0.00280899	0.00741127	0.00232693	0.00396249
Anxa5	0.235351	0.326923	0.465062	0.210674	0.317954	0.0779523	0.117202
Anxa6	0.137368	0.0961538	0.154503	0.0845818	0.0394572	0.101222	0.124378
Anxa7	0.126801	0.173077	0.221273	0.0617978	0.0421712	0.0477022	0.154097
Anxa9	0.000960615	0	0.00232919	0.00249688	0.00135699	0.000581734	0.00466693
Aoc2	0.000960615	0	0.00621118	0.00187266	0.000521921	0.00116347	0.0109629
Aoc3	0.000960615	0	0.111025	0.00062422	0.000208768	0.000581734	0.000704442
Aox1	0.00576369	0.00961538	0.00931677	0.0358926	0.00365344	0.0017452	0.0046229
Aox2	0	0	0	0	0	0	0.00233347
Ap1ar	0.0883766	0.105769	0.131988	0.0599251	0.0798539	0.0738802	0.271739
Ap1b1	0.121037	0.0480769	0.0636646	0.0745943	0.0623173	0.0663176	0.254128
Ap1g1	0.06244	0.0576923	0.0729814	0.0418227	0.0573069	0.0494474	0.180557
Ap1g2	0.0201729	0	0.00543478	0.00811486	0.00501044	0.0017452	0.0224101
Ap1m1	0.0931796	0.0673077	0.0954969	0.0664794	0.0764092	0.0826062	0.16528
Ap1s1	0.165226	0.153846	0.174689	0.115481	0.23309	0.137871	0.429622
Ap1s2	0.185399	0.0673077	0.115683	0.0749064	0.102401	0.106457	0.333245
Ap1s3	0.00480307	0	0.00465839	0.0031211	0.00167015	0.0017452	0.0290582
Ap2a1	0.131604	0.125	0.169255	0.123596	0.701461	0.270506	0.243165
Ap2a2	0.194044	0.153846	0.222826	0.168851	0.20501	0.264689	0.587461
Ap2b1	0.243036	0.211538	0.226708	0.150437	0.221608	0.185573	0.424338
Ap2m1	0.503362	0.451923	0.563665	0.331149	0.564927	0.489238	0.716154
Ap2s1	0.469741	0.471154	0.420807	0.342385	0.603758	0.355439	0.578303
Ap3b1	0.0931796	0.0576923	0.0652174	0.0349563	0.0451983	0.0221059	0.0706203
Ap3b2	0.0326609	0.0288462	0.0419255	0.0646067	0.0992693	0.080861	0.230133
Ap3d1	0.0854947	0.105769	0.100932	0.0967541	0.0850731	0.0843514	0.216528
Ap3m1	0.0413064	0.0673077	0.0690994	0.0783396	0.102818	0.052356	0.0928983
Ap3m2	0.0441883	0.0192308	0.0427019	0.0458801	0.043215	0.0541012	0.221239
Ap3s1	0.153698	0.144231	0.20264	0.0976904	0.0819415	0.119837	0.326201
Ap3s2	0.0480307	0.0384615	0.052795	0.0352684	0.0835073	0.054683	0.142341
Ap4b1	0.024976	0.0288462	0.0217391	0.011236	0.0178497	0.0122164	0.0224101
Ap4e1	0.0115274	0.00961538	0.011646	0.0093633	0.0153445	0.0116347	0.0368071
Ap4m1	0.0211335	0.00961538	0.0240683	0.0349563	0.026618	0.0209424	0.0677586
Ap4s1	0.115274	0.144231	0.149068	0.114232	0.15762	0.133799	0.285651
Ap5b1	0.0115274	0	0.00388199	0.00031211	0.00187891	0.0052356	0.00352221
Ap5m1	0.0182517	0.0576923	0.0419255	0.0308989	0.0343424	0.0302501	0.0847532
Ap5s1	0.0528338	0.0576923	0.0520186	0.0608614	0.0645094	0.0622455	0.112315
Ap5z1	0.0317003	0.0192308	0.0186335	0.0152934	0.0841336	0.0314136	0.0473738
Apaf1	0.0201729	0.0192308	0.0139752	0.0109238	0.00835073	0.0127981	0.0416942
Apba1	0.0365034	0.0192308	0.0900621	0.031211	0.0704593	0.0401396	0.203452
Apba2	0.0268972	0.0288462	0.0380435	0.126092	0.0665971	0.109948	0.215956
Apba3	0.0307397	0.0576923	0.052795	0.0330836	0.0558455	0.0250145	0.0587329
Apbb1	0.17195	0.221154	0.208075	0.151061	0.57547	0.223967	0.388896
Apbb1ip	0.361191	0.0192308	0.00232919	0.00156055	0.0164927	0.0215241	0.00321402
Apbb2	0.0778098	0.0769231	0.249224	0.0621099	0.341232	0.0820244	0.189847
Apc	0.114313	0.0192308	0.113354	0.184457	0.19833	0.0855148	0.223528
Apc2	0.0307397	0.0673077	0.0628882	0.117978	0.0354906	0.123909	0.277506
Apeh	0.0614793	0.0288462	0.0364907	0.0280899	0.0186848	0.0162885	0.0834324
Apex1	0.169068	0.0673077	0.0582298	0.0792759	0.0763048	0.0878418	0.163343
Apex2	0.00864553	0.00961538	0.011646	0.00780275	0.00929019	0.0116347	0.028662
Aph1a	0.15658	0.125	0.142081	0.111735	0.154697	0.0936591	0.121869
Aph1b	0.00960615	0.0384615	0.0395963	0.0505618	0.0337161	0.0657359	0.106239
Aph1c	0.0192123	0.00961538	0.00931677	0.0383895	0.0139875	0.0413031	0.0256681
Api5	0.107589	0.0384615	0.102484	0.0527466	0.0957203	0.061082	0.1268
Apip	0.0662824	0.0961538	0.0768634	0.0611735	0.0971816	0.0703898	0.0893321
Aplf	0.0144092	0.00961538	0.0124224	0.00561798	0.015762	0.0069808	0.0145291
Apln	0.00960615	0.00961538	0.015528	0.0671036	0.115553	0.00581734	0.0114912
Aplp1	0.378482	0.817308	0.666149	0.901373	0.999896	0.928447	0.757143
Aplp2	0.243036	0.615385	0.617236	0.339888	0.549478	0.595113	0.707348
Apmap	0.0576369	0.0576923	0.060559	0.0518102	0.0505219	0.0779523	0.169462
Apoa1	0.00384246	0.0192308	0.0209627	0.0118602	0.00762004	0.0122164	0.0856338
Apoa2	0.0067243	0.00961538	0.00854037	0.00530587	0.00375783	0.00639907	0.0593493
Apobec1	0.0566763	0.0288462	0.0209627	0.0062422	0.000835073	0.000581734	0.00101264
Apobec3	0.163305	0.00961538	0.052795	0.0302747	0.00334029	0.0197789	0.00400652
Apobr	0.0240154	0	0	0.00218477	0.00772443	0.00407213	0.000704442
Apoc1	0.012488	0	0.00931677	0.0886392	0.0131524	0.008726	0.0120195
Apoc3	0.000960615	0	0	0.00218477	0.000208768	0	0.00722053
Apod	0.133525	1	0.166925	0.0761548	0.9738	0.0936591	0.0918417
Apoe	0.726225	0.971154	0.86413	1	0.781211	0.989529	0.54537
Apoh	0.000960615	0	0.000776398	0.00156055	0.00146138	0.000581734	0.00391846
Apol6	0	0	0.000776398	0	0.000104384	0.000581734	0.001585
Apol8	0.00576369	0	0.00388199	0.00124844	0.000939457	0.00232693	0.0131202
Apol9a	0	0.00961538	0.0015528	0.00031211	0.000313152	0.000581734	0.0020693
Apold1	0.00480307	0	0.371894	0.00218477	0.00334029	0.0034904	0.0164223
Apoo	0.0470701	0.0192308	0.0621118	0.0749064	0.0682672	0.072135	0.173249
Apool	0.0240154	0.0288462	0.0240683	0.0146692	0.0262004	0.0133799	0.0135165
Apopt1	0.146974	0.153846	0.139752	0.112672	0.256472	0.113438	0.211861
App	0.458213	0.807692	0.786491	0.702559	0.913048	0.855148	0.891384
Appbp2	0.0902978	0.0769231	0.0923913	0.0671036	0.167745	0.0965678	0.221019
Appbp2os	0.000960615	0	0.000776398	0.00124844	0.00146138	0.000581734	0.000924581
Appl1	0.0816523	0.0673077	0.111801	0.0608614	0.116701	0.118674	0.263417
Appl2	0.0643612	0.153846	0.0504658	0.235331	0.123382	0.0442118	0.0576762
Aprt	0.189241	0.163462	0.15295	0.0895755	0.0748434	0.132635	0.248316
Aptx	0.0691643	0.0480769	0.0597826	0.0468165	0.117537	0.0616638	0.136398
Aqp11	0.0105668	0.00961538	0.110248	0.0358926	0.0112735	0.0151251	0.0695637
Aqp4	0.0365034	0.0480769	0.0411491	0.535268	0.0354906	0.008726	0.0348259
Aqp5	0	0	0	0.00156055	0.000313152	0.0069808	0.00154097
Aqp6	0	0	0	0.00031211	0.000208768	0	0.00202527
Aqp9	0.000960615	0	0.00232919	0.0390137	0.00114823	0.000581734	0.00211333
Aqr	0.0826129	0.0865385	0.0916149	0.0602372	0.076096	0.0709715	0.135121
Ar	0.0134486	0.115385	0.0776398	0.0190387	0.0192067	0.0250145	0.216
Araf	0.244957	0.317308	0.292702	0.259675	0.325261	0.289122	0.749219
Arap1	0.079731	0.0673077	0.0372671	0.0202871	0.0295407	0.0186155	0.00801303
Arap2	0.0403458	0.0576923	0.136646	0.141074	0.26952	0.0407213	0.0455246
Arap3	0.0778098	0	0.0690994	0	0.000626305	0.0017452	0.00105666
Arc	0.00480307	0.00961538	0.0240683	0.00124844	0.0899791	0.00232693	0.027077
Arcn1	0.0960615	0.153846	0.118012	0.0639825	0.108038	0.0581734	0.188658
Areg	0	0	0	0.00062422	0	0	0.00427068
Arel1	0.0288184	0.0288462	0.0395963	0.0193508	0.038309	0.0325771	0.0794699
Arf1	0.487992	0.509615	0.46118	0.249064	0.404697	0.33217	0.666667
Arf2	0.0595581	0.0576923	0.0667702	0.0274657	0.0441545	0.0383944	0.14899
Arf3	0.166186	0.144231	0.166149	0.0989388	0.109708	0.109366	0.615991
Arf4	0.502402	0.432692	0.356366	0.224095	0.266388	0.281559	0.391362
Arf4os	0.00192123	0.00961538	0.000776398	0.00249688	0.00146138	0.0017452	0.00708845
Arf5	0.502402	0.442308	0.474379	0.38171	0.514301	0.545666	0.677541
Arf6	0.236311	0.105769	0.246118	0.0617978	0.11263	0.0732984	0.138995
Arfgap1	0.0758886	0.0192308	0.102484	0.0636704	0.0892484	0.0919139	0.176155
Arfgap2	0.125841	0.105769	0.129658	0.102684	0.169415	0.11402	0.168054
Arfgap3	0.0307397	0.144231	0.0543478	0.0187266	0.0980167	0.0209424	0.0656012
Arfgef1	0.0393852	0.0769231	0.0745342	0.0477528	0.0634656	0.0570099	0.189627
Arfgef2	0.0163305	0.0288462	0.0318323	0.0162297	0.0401879	0.0157068	0.10571
Arfgef3	0.0307397	0.0576923	0.0496894	0.0277778	0.0484342	0.0651542	0.371505
Arfip1	0.0326609	0.0673077	0.0962733	0.0280899	0.102192	0.0325771	0.0583366
Arfip2	0.0691643	0.0576923	0.111801	0.0886392	0.119415	0.0767888	0.161405
Arfrp1	0.169068	0.125	0.146739	0.0905119	0.146138	0.108202	0.214679
Arg1	0	0	0.0015528	0.00093633	0.000417537	0.00116347	0.00343416
Arg2	0	0.00961538	0.000776398	0	0.00104384	0.000581734	0.00616387
Arglu1	0.458213	0.596154	0.475155	0.561486	0.48048	0.440372	0.653899
Arhgap1	0.0509126	0.0192308	0.122671	0.0355805	0.0427975	0.0418848	0.122529
Arhgap10	0.0105668	0.0384615	0.15528	0.00374532	0.00313152	0.0145433	0.0150575
Arhgap11a	0.0288184	0.00961538	0	0.00124844	0.0019833	0.00581734	0.00321402
Arhgap12	0.0902978	0.0673077	0.0380435	0.0602372	0.041023	0.0511926	0.137718
Arhgap15	0.0115274	0.00961538	0.0178571	0.00561798	0.0914405	0.0104712	0.0237309
Arhgap17	0.111431	0.0480769	0.0986025	0.045568	0.055428	0.0418848	0.0614626
Arhgap18	0.0288184	0.0865385	0.0302795	0.00499376	0.00187891	0.00232693	0.0492669
Arhgap19	0.024976	0	0.00698758	0.00156055	0.00240084	0.0034904	0.00633998
Arhgap20	0.0240154	0.192308	0.0364907	0.0308989	0.0280793	0.105294	0.256461
Arhgap21	0.0365034	0.163462	0.0465839	0.0814607	0.111482	0.0453752	0.123586
Arhgap22	0.121998	0.0288462	0.00776398	0.00374532	0.00574113	0.0494474	0.0263285
Arhgap23	0.0278578	0.0576923	0.0613354	0.0230961	0.271503	0.0337405	0.0908731
Arhgap24	0.0422671	0.0288462	0.0326087	0.0333958	0.0196242	0.0738802	0.151279
Arhgap25	0.137368	0	0.0201863	0.00031211	0.000521921	0.000581734	0.000616387
Arhgap26	0.0115274	0.0288462	0.0372671	0.0362047	0.0102296	0.0250145	0.159996
Arhgap27	0.0864553	0.00961538	0.0520186	0.00530587	0.00949896	0.0151251	0.0831682
Arhgap27os1	0.00864553	0	0.0108696	0	0.000208768	0	0.00484304
Arhgap27os2	0.0134486	0.0480769	0.0178571	0.0159176	0.0158664	0.0209424	0.115969
Arhgap28	0	0.00961538	0.000776398	0.00031211	0.000104384	0.000581734	0.0012768
Arhgap29	0.012488	0.355769	0.343168	0.00499376	0.00448852	0.00116347	0.00704442
Arhgap30	0.195005	0	0	0	0.000730689	0	0.000792498
Arhgap31	0.144092	0.182692	0.315994	0.0692884	0.0934238	0.429319	0.0184476
Arhgap32	0.0268972	0.0673077	0.0388199	0.0505618	0.0529228	0.0413031	0.187998
Arhgap33	0.012488	0	0.0248447	0.017166	0.0392484	0.0354857	0.122617
Arhgap35	0.0326609	0.0865385	0.0729814	0.0465044	0.0697286	0.101222	0.195042
Arhgap36	0.00768492	0.0192308	0.0131988	0.00967541	0.0114823	0.0110529	0.130234
Arhgap39	0.0874159	0.00961538	0.0318323	0.0358926	0.123591	0.0389761	0.141065
Arhgap4	0.0422671	0.00961538	0.000776398	0.00156055	0.000835073	0.000581734	0.0103025
Arhgap42	0.00192123	0.0288462	0.0892857	0.0246567	0.00365344	0.008726	0.0172588
Arhgap44	0.037464	0.0384615	0.052795	0.0349563	0.0325678	0.0465387	0.234755
Arhgap45	0.31316	0	0.00310559	0.00156055	0.00135699	0.00116347	0.00303791
Arhgap5	0.389049	0.211538	0.167702	0.348315	0.236639	0.133799	0.239642
Arhgap6	0.0115274	0.0288462	0.0908385	0.00686642	0.00730689	0.00930774	0.0910932
Arhgap8	0	0	0.0100932	0.00062422	0	0.000581734	0.00101264
Arhgap9	0.0970221	0	0.00388199	0.00062422	0.000417537	0.000581734	0.000792498
Arhgdia	0.583093	0.384615	0.440994	0.209738	0.529436	0.23153	0.41681
Arhgdib	0.573487	0.0192308	0.14441	0.00749064	0.00730689	0.00465387	0.020737
Arhgdig	0.217099	0.201923	0.185559	0.185393	0.179854	0.212914	0.74257
Arhgef1	0.18732	0.0961538	0.149068	0.0873908	0.0678497	0.101803	0.134813
Arhgef10	0.0192123	0.0576923	0.0504658	0.0418227	0.36691	0.0378127	0.0228063
Arhgef10l	0.0268972	0.0384615	0.0287267	0.0383895	0.00876827	0.0378127	0.0706203
Arhgef11	0.0153698	0.0384615	0.0419255	0.0230961	0.0175365	0.0221059	0.109145
Arhgef12	0.079731	0.144231	0.296584	0.241573	0.11691	0.0971495	0.25809
Arhgef15	0.0144092	0.0192308	0.113354	0.0174782	0.0189979	0.0226876	0.182891
Arhgef16	0	0	0.00310559	0.00093633	0.000730689	0.000581734	0.00880553
Arhgef17	0.0240154	0.0576923	0.178571	0.0349563	0.0269311	0.0366492	0.197112
Arhgef18	0.0220941	0.00961538	0.0333851	0.0337079	0.0209812	0.0168703	0.0883195
Arhgef19	0.0105668	0.0192308	0.015528	0.07397	0.023904	0.0267597	0.00898164
Arhgef2	0.129683	0.0673077	0.225932	0.0346442	0.244572	0.0506108	0.0799542
Arhgef25	0.0307397	0.0961538	0.187888	0.0477528	0.019833	0.0354857	0.177828
Arhgef26	0.0192123	0.0288462	0.0201863	0.22191	0.0160752	0.0453752	0.0296746
Arhgef28	0.012488	0.0288462	0.0271739	0.045568	0.114301	0.0500291	0.0790737
Arhgef3	0.0259366	0.00961538	0.048913	0.00811486	0.00887265	0.0343223	0.0415621
Arhgef33	0.00192123	0	0.00232919	0.00280899	0.00167015	0.00116347	0.0120636
Arhgef37	0	0	0.000776398	0.00062422	0.00281837	0.000581734	0.000792498
Arhgef38	0	0	0	0	0	0	0.00369832
Arhgef4	0.0778098	0.0769231	0.0659938	0.125156	0.0524008	0.0779523	0.302866
Arhgef40	0.103746	0.201923	0.0830745	0.0774032	0.0331942	0.0977312	0.123894
Arhgef5	0.00384246	0.00961538	0.0543478	0.00468165	0.000417537	0	0.000616387
Arhgef6	0.0999039	0.0384615	0.0512422	0.00998752	0.00375783	0.0250145	0.0337252
Arhgef7	0.0355427	0.0288462	0.23059	0.0564919	0.035595	0.0616638	0.166469
Arhgef9	0.0432277	0.0288462	0.0582298	0.0742821	0.0568894	0.0796975	0.296394
Arid1a	0.257445	0.115385	0.201863	0.137016	0.160856	0.129145	0.273368
Arid1b	0.054755	0.0865385	0.0993789	0.0471286	0.0651357	0.0564282	0.163078
Arid2	0.0854947	0.0576923	0.0986025	0.0758427	0.0565762	0.0709715	0.145732
Arid3a	0.0307397	0	0.0163043	0.00093633	0.00720251	0.0017452	0.0311716
Arid3b	0.0826129	0.00961538	0.0147516	0.0093633	0.00845511	0.0034904	0.0250517
Arid4a	0.192123	0.153846	0.188665	0.0848939	0.107307	0.118674	0.30903
Arid4b	0.121037	0.115385	0.142081	0.109551	0.237056	0.113438	0.264254
Arid5a	0.067243	0.00961538	0.104037	0.0477528	0.0367432	0.0122164	0.0132523
Arid5b	0.146974	0.0480769	0.28882	0.0452559	0.36785	0.0442118	0.129309
Arih1	0.0864553	0.0384615	0.0993789	0.0580524	0.0769311	0.0558464	0.175362
Arih2	0.0528338	0.0384615	0.0597826	0.0377653	0.0632568	0.0424666	0.116409
Arl1	0.235351	0.307692	0.271739	0.123596	0.230376	0.190809	0.360014
Arl10	0.06244	0.0576923	0.0170807	0.0168539	0.0234864	0.0122164	0.03509
Arl11	0.103746	0	0	0.00031211	0.000208768	0	0.000704442
Arl13b	0.0317003	0.0576923	0.0698758	0.0299625	0.0949896	0.0331588	0.0517325
Arl14ep	0.0384246	0.0673077	0.0481366	0.0505618	0.0643006	0.0599186	0.134989
Arl15	0.012488	0.00961538	0.0240683	0.00686642	0.00584551	0.0151251	0.0417382
Arl16	0.0585975	0.0769231	0.0652174	0.0593009	0.0831942	0.0686446	0.225686
Arl2	0.233429	0.278846	0.253882	0.247815	0.649374	0.240256	0.453705
Arl2bp	0.15658	0.134615	0.370342	0.203184	0.433403	0.433392	0.387707
Arl3	0.233429	0.326923	0.309783	0.300562	0.340919	0.257126	0.521155
Arl4a	0.0384246	0.173077	0.311335	0.0365169	0.0496868	0.111111	0.148241
Arl4c	0.258405	0	0.052795	0.0362047	0.0262004	0.0826062	0.317263
Arl4d	0.0182517	0.153846	0.0861801	0.00499376	0.134029	0.00465387	0.0146612
Arl5a	0.054755	0.0480769	0.0551242	0.0362047	0.0574113	0.0407213	0.16845
Arl5b	0.0336215	0.0769231	0.0481366	0.0308989	0.0196242	0.0302501	0.0980936
Arl5c	0.0730067	0.0192308	0.0131988	0.00374532	0.000835073	0.008726	0.00603179
Arl6	0.0432277	0.0576923	0.0815217	0.0755306	0.120877	0.0645724	0.179809
Arl6ip1	0.646494	0.625	0.51087	0.654806	0.623382	0.829552	0.835205
Arl6ip4	0.158501	0.144231	0.201863	0.115169	0.206994	0.13438	0.329151
Arl6ip5	0.270893	0.307692	0.293478	0.207241	0.299896	0.297266	0.457667
Arl6ip6	0.0653218	0.00961538	0.0667702	0.0736579	0.0560543	0.0756254	0.10822
Arl8a	0.225744	0.201923	0.182453	0.209114	0.451566	0.230948	0.483424
Arl8b	0.186359	0.125	0.164596	0.157615	0.235908	0.189645	0.465328
Armc1	0.115274	0.153846	0.175466	0.135768	0.242589	0.146597	0.306476
Armc10	0.0259366	0.0288462	0.0364907	0.0143571	0.0207724	0.0191972	0.0682429
Armc2	0.0067243	0.0288462	0.0209627	0.0174782	0.00845511	0.00465387	0.0522168
Armc3	0.0701249	0	0.00854037	0.00124844	0.000835073	0.000581734	0.000836525
Armc5	0.0643612	0.0576923	0.0403727	0.0221598	0.0232777	0.0244328	0.0344296
Armc6	0.0240154	0.0288462	0.0349379	0.0259051	0.0457203	0.0418848	0.100779
Armc7	0.0201729	0.00961538	0.00931677	0.00749064	0.0085595	0.00465387	0.0265487
Armc8	0.0528338	0.0192308	0.076087	0.0499376	0.0506263	0.0471204	0.187073
Armc9	0.0182517	0.0288462	0.0209627	0.0308989	0.018476	0.0162885	0.133448
Armcx1	0.0259366	0.0384615	0.0745342	0.0477528	0.0628392	0.0680628	0.252146
Armcx2	0.037464	0.0673077	0.0667702	0.0321473	0.0334029	0.045957	0.195967
Armcx3	0.074928	0.134615	0.0822981	0.0477528	0.0735908	0.11402	0.218157
Armcx4	0.0134486	0	0.0124224	0.0177903	0.0085595	0.0180337	0.146788
Armcx5	0.0336215	0.0480769	0.0450311	0.0277778	0.0424843	0.0389761	0.118699
Armcx6	0.0134486	0.0769231	0.0240683	0.0156055	0.0115866	0.0366492	0.0999868
Armt1	0.0268972	0.0576923	0.0232919	0.0277778	0.0270355	0.0308319	0.077973
Arnt	0.037464	0.0961538	0.0690994	0.0358926	0.0347599	0.0337405	0.09237
Arnt2	0.0432277	0.0288462	0.0419255	0.0642946	0.137161	0.0570099	0.173909
Arntl	0.0144092	0.00961538	0.0194099	0.0352684	0.0115866	0.0157068	0.0731299
Arntl2	0	0	0.0108696	0.00561798	0.010334	0.00465387	0.0237309
Arpc1a	0.341979	0.375	0.298913	0.19975	0.78904	0.258871	0.350196
Arpc1b	0.79731	0.259615	0.361801	0.0202871	0.189666	0.0378127	0.0283098
Arpc2	0.768492	0.317308	0.523292	0.174157	0.312422	0.2484	0.345177
Arpc3	0.567723	0.317308	0.395186	0.165106	0.291545	0.211169	0.365077
Arpc4	0.560999	0.230769	0.264752	0.176654	0.247704	0.23153	0.407124
Arpc5	0.387128	0.192308	0.326863	0.127029	0.478914	0.182083	0.302162
Arpc5l	0.345821	0.259615	0.359472	0.268414	0.398539	0.29203	0.573196
Arpin	0.00576369	0.0288462	0.0504658	0.0234082	0.0313152	0.0197789	0.0376436
Arpp19	0.470701	0.336538	0.538043	0.309301	0.615449	0.269343	0.464007
Arpp21	0.0288184	0.0288462	0.0364907	0.0926966	0.0246347	0.167539	0.20332
Arrb1	0.0864553	0.0576923	0.0559006	0.129838	0.0262004	0.0628272	0.214591
Arrb2	0.37464	0.0384615	0.0496894	0.0327715	0.0450939	0.0500291	0.174878
Arrdc1	0.120077	0	0.0442547	0.00967541	0.0104384	0.0157068	0.0742306
Arrdc2	0.0307397	0.0384615	0.0372671	0.0234082	0.181733	0.0232693	0.0316559
Arrdc3	0.0893372	0.00961538	0.0628882	0.0393258	0.315553	0.0319953	0.0587329
Arrdc4	0.0336215	0	0.011646	0.00873908	0.00647182	0.0145433	0.0457007
Arsa	0.0451489	0.0576923	0.0287267	0.0374532	0.0506263	0.0157068	0.10527
Arsb	0.197887	0.0576923	0.0395963	0.0730337	0.0719207	0.230948	0.13019
Arsg	0.037464	0.0576923	0.0295031	0.0124844	0.378601	0.0122164	0.0227623
Arsj	0.000960615	0	0.000776398	0.00218477	0.000626305	0.0162885	0.0129441
Arsk	0.0518732	0.0576923	0.0310559	0.0714732	0.0329854	0.0325771	0.0176551
Art3	0.00480307	0	0.132764	0.00249688	0.0951983	0.00116347	0.0054154
Art5	0	0	0	0	0	0	0.00193722
Artn	0.000960615	0	0.00776398	0.00187266	0.00114823	0.00290867	0.0142209
Arv1	0.00960615	0.0288462	0.00776398	0.0137328	0.0104384	0.0104712	0.0336371
Arvcf	0.0432277	0.0192308	0.0590062	0.0296504	0.0229645	0.0674811	0.0802624
Arxes1	0.0259366	0.0576923	0.0341615	0.166979	0.0212944	0.222222	0.273588
Arxes2	0.0739673	0.105769	0.068323	0.395755	0.0539666	0.319372	0.441025
As3mt	0.132565	0.0865385	0.118012	0.0730337	0.0892484	0.0703898	0.123101
Asah1	0.528338	0.125	0.124224	0.212547	0.108455	0.207097	0.195791
Asah2	0.00576369	0	0.00621118	0.00280899	0.0175365	0.0069808	0.0185356
Asap1	0.197887	0.192308	0.159161	0.176654	0.134029	0.177429	0.212433
Asap2	0.0259366	0.0961538	0.148292	0.124532	0.0849687	0.0826062	0.141197
Asap3	0.0211335	0	0.00776398	0.00561798	0.00490605	0.0157068	0.019064
Asb1	0.0201729	0.0192308	0.0256211	0.0168539	0.0353862	0.0186155	0.0917096
Asb10	0.0172911	0	0.0147516	0	0	0	0.000396249
Asb11	0.000960615	0	0.0201863	0	0.000104384	0	0.000176111
Asb13	0.0605187	0.0288462	0.0636646	0.0490012	0.0289144	0.0477022	0.0988861
Asb16	0.000960615	0.00961538	0.00465839	0.00249688	0.00208768	0.00232693	0.0330648
Asb18	0	0	0	0.00062422	0.000417537	0	0.00321402
Asb2	0.079731	0	0.252329	0.00093633	0.00250522	0.0017452	0.0082772
Asb3	0.0355427	0.0480769	0.048913	0.0377653	0.0421712	0.04363	0.0888038
Asb4	0.012488	0.00961538	0.0372671	0.0146692	0.0138831	0.0168703	0.128649
Asb5	0.000960615	0.00961538	0.0201863	0.00124844	0.00323591	0.000581734	0.00510721
Asb6	0.0393852	0.0673077	0.0473602	0.0237203	0.0457203	0.0285049	0.0712367
Asb7	0.0240154	0.0384615	0.0411491	0.0324594	0.0346555	0.0267597	0.0794699
Asb8	0.0778098	0.0480769	0.0939441	0.076779	0.110856	0.0744619	0.139744
Ascc1	0.108549	0.0384615	0.0667702	0.0324594	0.0772443	0.0418848	0.117862
Ascc2	0.0317003	0.00961538	0.0271739	0.0221598	0.0341336	0.0232693	0.0568397
Ascc3	0.0489914	0.0384615	0.0512422	0.0321473	0.0529228	0.0378127	0.114384
Ascl1	0.00288184	0	0.00698758	0.0124844	0.00344468	0.170448	0.019152
Ascl2	0.0105668	0.0288462	0.00465839	0.00093633	0.000208768	0	0.00347818
Ascl4	0.000960615	0	0	0.00062422	0.000626305	0.000581734	0.00259763
Asf1a	0.0634006	0.0673077	0.076087	0.0555556	0.089666	0.0605003	0.0676265
Asf1b	0.00768492	0	0.00621118	0.00124844	0.00323591	0.00756254	0.00933386
Asgr1	0	0.00961538	0	0.00031211	0.000939457	0.00116347	0.00352221
Ash1l	0.151777	0.125	0.192547	0.159176	0.14238	0.144852	0.303923
Ash2l	0.0816523	0.0384615	0.0613354	0.0546192	0.0890397	0.054683	0.132127
Asic1	0.0163305	0.0384615	0.0201863	0.0408864	0.0158664	0.197789	0.203936
Asic2	0.0211335	0.0288462	0.0256211	0.0486891	0.0132568	0.0843514	0.202659
Asic3	0	0	0	0.00062422	0.00521921	0.0034904	0.00664818
Asic4	0.00480307	0.00961538	0.00310559	0.00561798	0.00146138	0.0703898	0.0151895
Asl	0.0902978	0.0576923	0.0535714	0.0380774	0.0368476	0.0651542	0.15621
Asna1	0.179635	0.125	0.135093	0.11829	0.224426	0.126818	0.203011
Asns	0.0403458	0.0192308	0.0442547	0.0355805	0.0358038	0.0593368	0.183948
Asnsd1	0.0854947	0.0384615	0.0465839	0.0315231	0.0683716	0.052356	0.0770924
Aspa	0.0365034	0.0769231	0.0419255	0.0371411	0.616075	0.0122164	0.0182715
Aspdh	0.000960615	0	0.0015528	0.00031211	0.00292276	0.00232693	0.012812
Aspg	0	0.0384615	0.000776398	0.00655431	0.000208768	0	0.000528332
Asph	0.231508	0.115385	0.113354	0.122971	0.0250522	0.0791158	0.25853
Asphd1	0.00768492	0.0288462	0.0139752	0.00842697	0.0131524	0.0104712	0.103465
Asphd2	0.0288184	0.00961538	0.0318323	0.0686642	0.0507307	0.0814427	0.287589
Aspm	0	0	0	0.00187266	0	0.0069808	0.00356624
Aspn	0.00480307	0	0.365683	0.00031211	0.000730689	0.00116347	0.00162902
Asprv1	0	0	0	0	0.000521921	0	0.00369832
Aspscr1	0.118156	0.0865385	0.126553	0.0830212	0.15261	0.0878418	0.149958
Asrgl1	0.0883766	0.134615	0.0916149	0.398876	0.331733	0.274578	0.115044
Ass1	0.0585975	0.0673077	0.0892857	0.0577403	0.0584551	0.0715532	0.252939
Aste1	0.0317003	0.0384615	0.0380435	0.022784	0.0209812	0.0413031	0.0659534
Astn1	0.0259366	0.0384615	0.0395963	0.131086	0.0158664	0.112856	0.326333
Astn2	0.00288184	0.00961538	0.0108696	0.0146692	0.00480167	0.0622455	0.116365
Asxl1	0.0585975	0.0192308	0.0535714	0.0243446	0.0447808	0.0319953	0.109189
Asxl2	0.0778098	0.0769231	0.0900621	0.0967541	0.0859081	0.0820244	0.154405
Asxl3	0.00384246	0.00961538	0.00621118	0.00374532	0.0313152	0.0215241	0.0898604
Atad1	0.0951009	0.0769231	0.117236	0.126404	0.162317	0.17801	0.306565
Atad2	0.0163305	0.00961538	0.0225155	0.0109238	0.00793319	0.0168703	0.0339453
Atad2b	0.0489914	0.0673077	0.0807453	0.0742821	0.0744259	0.0587551	0.106767
Atad3a	0.0605187	0.0769231	0.052795	0.051186	0.0615866	0.0779523	0.147361
Atad3aos	0.000960615	0.0576923	0.00931677	0.0140449	0.0209812	0.0069808	0.0112271
Atad5	0.0115274	0.00961538	0.015528	0.0118602	0.0106472	0.00930774	0.0250077
Atat1	0.0701249	0.125	0.0636646	0.0955056	0.214509	0.113438	0.203276
Atcay	0.0259366	0.0288462	0.0395963	0.0371411	0.0392484	0.11402	0.331044
Atcayos	0.00384246	0	0.126553	0.00062422	0.000417537	0.00290867	0.0142209
Ate1	0.101825	0.125	0.163043	0.135456	0.137474	0.118092	0.323295
Atf1	0.121037	0.0673077	0.0970497	0.0377653	0.0456159	0.034904	0.0903888
Atf2	0.0701249	0.0576923	0.11413	0.0770911	0.115449	0.0762071	0.29952
Atf3	0.655139	0.0192308	0.341615	0.0106117	0.0100209	0.00639907	0.0194602
Atf4	0.357349	0.259615	0.333075	0.142946	0.20501	0.176265	0.340554
Atf5	0.0307397	0.163462	0.171584	0.0265293	0.0511482	0.0180337	0.0665258
Atf6	0.0432277	0	0.0333851	0.0152934	0.0314196	0.0215241	0.0583366
Atf6b	0.115274	0.0961538	0.0815217	0.0696005	0.128497	0.11402	0.100779
Atf7	0.0461095	0.105769	0.0621118	0.0583645	0.0692067	0.0319953	0.0463611
Atf7ip	0.0970221	0.105769	0.129658	0.124532	0.177662	0.137289	0.16321
Atg10	0.0451489	0.00961538	0.0450311	0.0265293	0.0590814	0.0279232	0.108616
Atg101	0.152738	0.144231	0.135093	0.0733458	0.123695	0.139034	0.184476
Atg12	0.0585975	0.0480769	0.0993789	0.0589888	0.0746347	0.0506108	0.170739
Atg13	0.0384246	0.0480769	0.0954969	0.0399501	0.0586639	0.0453752	0.163034
Atg14	0.0461095	0.0576923	0.0481366	0.0308989	0.0494781	0.034904	0.0853256
Atg16l1	0.0509126	0.00961538	0.0768634	0.0402622	0.0545929	0.0442118	0.126976
Atg16l2	0.0201729	0.0480769	0.0621118	0.0358926	0.0217119	0.0465387	0.108836
Atg2a	0.0230548	0.0288462	0.0388199	0.0287141	0.0307933	0.0209424	0.0918417
Atg2b	0.0201729	0.00961538	0.0225155	0.0127965	0.0177453	0.0215241	0.0657773
Atg3	0.164265	0.105769	0.13354	0.0889513	0.226409	0.100058	0.134813
Atg4a	0.012488	0.00961538	0.0434783	0.00842697	0.022547	0.0069808	0.0107868
Atg4b	0.0605187	0.0576923	0.0784161	0.0496255	0.105532	0.0814427	0.162286
Atg4c	0.0537944	0.0576923	0.0450311	0.0355805	0.214823	0.0453752	0.124686
Atg4d	0.0585975	0.0673077	0.0799689	0.0365169	0.108142	0.0488656	0.110421
Atg5	0.157541	0.0480769	0.0854037	0.0583645	0.0810021	0.0663176	0.136398
Atg7	0.0470701	0.0480769	0.0458075	0.0293383	0.043215	0.0314136	0.0547704
Atg9a	0.0432277	0.115385	0.0745342	0.0895755	0.0871608	0.0738802	0.213446
Atg9b	0.00576369	0.0384615	0.0139752	0.011236	0.00521921	0.00756254	0.148021
Atic	0.0653218	0.0480769	0.0388199	0.0387016	0.0447808	0.0581734	0.117774
Atl1	0.0441883	0.0576923	0.0411491	0.0436954	0.0824635	0.0919139	0.365209
Atl2	0.0403458	0.0384615	0.0698758	0.151685	0.0248434	0.0232693	0.148813
Atl3	0.00864553	0.0192308	0.0256211	0.00905119	0.0379958	0.0157068	0.0248756
Atm	0.0105668	0.00961538	0.0139752	0.0149813	0.0222338	0.0221059	0.0408577
Atmin	0.0662824	0	0.0349379	0.0259051	0.0322547	0.0366492	0.155902
Atn1	0.054755	0.125	0.0885093	0.0752185	0.112213	0.061082	0.201647
Atoh7	0	0	0.00232919	0.00093633	0.00104384	0.00290867	0.0279135
Atoh8	0	0.00961538	0.00543478	0.00187266	0.000417537	0.0052356	0.00118875
Atox1	0.690682	0.480769	0.673137	0.378589	0.606785	0.343805	0.542421
Atp10a	0.00384246	0	0.124224	0.00031211	0.000208768	0.000581734	0.00378638
Atp10b	0.00192123	0	0.00232919	0.00031211	0.0343424	0.00290867	0.001585
Atp11a	0.0288184	0.0192308	0.0667702	0.0465044	0.16524	0.0401396	0.102496
Atp11b	0.0432277	0.0384615	0.0776398	0.0664794	0.0496868	0.0541012	0.185356
Atp11c	0.0182517	0.0288462	0.0403727	0.0121723	0.0091858	0.0186155	0.0546383
Atp13a1	0.06244	0.0384615	0.0427019	0.0458801	0.0336117	0.0447935	0.101924
Atp13a2	0.121998	0.0769231	0.0551242	0.0627341	0.055428	0.0994764	0.279091
Atp13a3	0.0883766	0.0865385	0.076087	0.0324594	0.0302714	0.0587551	0.162066
Atp13a4	0.0134486	0.00961538	0.0194099	0.240325	0.0132568	0.0186155	0.0162462
Atp13a5	0.0067243	0	0.177795	0.0402622	0.00354906	0.000581734	0.00422665
Atp1a1	0.231508	0.0961538	0.170807	0.0696005	0.339875	0.213496	0.270198
Atp1a2	0.18828	0.980769	0.737578	0.991261	0.165762	0.667248	0.149694
Atp1a3	0.166186	0.259615	0.222826	0.2397	0.131524	0.43281	0.860564
Atp1b1	0.314121	0.605769	0.618789	0.708177	0.294885	0.820826	0.972395
Atp1b2	0.158501	0.336538	0.528727	0.965044	0.136013	0.454334	0.452516
Atp1b3	0.254563	0.413462	0.234472	0.0736579	0.667015	0.182664	0.251354
Atp23	0.0268972	0.0192308	0.015528	0.0121723	0.00887265	0.0203607	0.0475939
Atp2a2	0.132565	0.221154	0.40528	0.362984	0.191232	0.177429	0.544314
Atp2a3	0.00384246	0	0.107919	0	0.000208768	0.000581734	0.00123277
Atp2b1	0.293948	0.163462	0.335404	0.159488	0.179749	0.334497	0.704751
Atp2b2	0.037464	0.0288462	0.0411491	0.0870787	0.026618	0.0686446	0.404482
Atp2b3	0.00192123	0.00961538	0.00310559	0.00218477	0.00240084	0.0069808	0.0921939
Atp2b4	0.0134486	0.125	0.170807	0.0508739	0.0106472	0.0360675	0.232334
Atp2c1	0.173871	0.173077	0.187888	0.14201	0.229541	0.142525	0.278211
Atp2c2	0	0	0	0	0	0.00116347	0.00453485
Atp4a	0	0	0.00310559	0.00093633	0.000730689	0.0069808	0.0117994
Atp5a1	0.574448	0.548077	0.588509	0.463483	0.486743	0.486329	0.668296
Atp5b	0.763689	0.75	0.841615	0.814295	0.731942	0.89587	0.79897
Atp5c1	0.512968	0.403846	0.507764	0.431336	0.530167	0.378709	0.529829
Atp5d	0.642651	0.701923	0.718944	0.699126	0.721608	0.789412	0.75842
Atp5e	0.792507	0.778846	0.865683	0.819288	0.780793	0.862129	0.820323
Atp5f1	0.490874	0.365385	0.425466	0.427278	0.558664	0.461896	0.658433
Atp5g1	0.756004	0.855769	0.849379	0.904806	0.845407	0.92961	0.917624
Atp5g2	0.665706	0.538462	0.593944	0.507491	0.702505	0.493892	0.583675
Atp5g3	0.512968	0.586538	0.642081	0.658552	0.542171	0.720186	0.78717
Atp5h	0.79731	0.846154	0.886646	0.883895	0.893006	0.931937	0.866992
Atp5j	0.853026	0.951923	0.961957	0.959738	0.863987	0.965678	0.953859
Atp5j2	0.838617	0.913462	0.923137	0.948502	0.884134	0.95986	0.919341
Atp5k	0.681076	0.759615	0.833851	0.835206	0.775052	0.897615	0.870867
Atp5l	0.848223	0.951923	0.948758	0.952247	0.887056	0.964514	0.929336
Atp5o.1	0.567723	0.634615	0.581522	0.682272	0.658768	0.726003	0.732444
Atp5s	0.0268972	0.0673077	0.0310559	0.0240325	0.048643	0.0366492	0.120063
Atp6ap1	0.417867	0.394231	0.216615	0.197566	0.402714	0.315881	0.518161
Atp6ap1l	0.000960615	0	0.0015528	0.0031211	0.00135699	0.045957	0.00598776
Atp6ap2	0.286263	0.134615	0.145186	0.178527	0.25334	0.18441	0.461586
Atp6v0a1	0.121998	0.0961538	0.131988	0.113296	0.108142	0.108202	0.477876
Atp6v0a2	0.119116	0.0384615	0.0613354	0.0558677	0.0702505	0.0680628	0.0910932
Atp6v0b	0.849183	0.721154	0.709627	0.860175	0.850522	0.933682	0.822392
Atp6v0c	0.0605187	0.00961538	0.00310559	0.00405743	0.00480167	0.00756254	0.0179193
Atp6v0d1	0.26609	0.182692	0.212733	0.190075	0.336221	0.269343	0.398494
Atp6v0e	0.557157	0.375	0.437888	0.588015	0.366493	0.663758	0.113283
Atp6v0e2	0.126801	0.201923	0.250776	0.234707	0.446242	0.439791	0.758464
Atp6v1a	0.224784	0.269231	0.249224	0.212859	0.292484	0.241419	0.667591
Atp6v1b2	0.279539	0.221154	0.22205	0.243134	0.275678	0.260617	0.625193
Atp6v1c1	0.277618	0.230769	0.194099	0.166667	0.237265	0.179756	0.480166
Atp6v1c2	0.000960615	0.00961538	0	0.00062422	0.000835073	0.000581734	0.00563554
Atp6v1d	0.292027	0.269231	0.306677	0.249064	0.349687	0.247818	0.580372
Atp6v1e1	0.528338	0.673077	0.545807	0.553059	0.721712	0.658522	0.701669
Atp6v1f	0.736792	0.663462	0.69177	0.679151	0.76357	0.808028	0.823185
Atp6v1g1	0.723343	0.634615	0.611025	0.465356	0.74572	0.550902	0.637564
Atp6v1g2	0.285303	0.346154	0.273292	0.284956	0.275574	0.317045	0.734865
Atp6v1h	0.0960615	0.0961538	0.121118	0.085206	0.110021	0.118092	0.280148
Atp7a	0.0230548	0.0480769	0.0178571	0.0162297	0.014405	0.008726	0.0204729
Atp7b	0.00288184	0	0.00310559	0.025593	0.0026096	0.0104712	0.00805706
Atp8a1	0.138329	0.0384615	0.117236	0.0845818	0.292171	0.0942408	0.380663
Atp8a2	0.0979827	0.0192308	0.0295031	0.0193508	0.0189979	0.0418848	0.194162
Atp8b1	0.0067243	0.00961538	0.0465839	0.00031211	0.0193111	0.00116347	0.00396249
Atp8b2	0.00384246	0.0192308	0.0271739	0.00842697	0.00240084	0.0122164	0.0707524
Atp8b3	0.00192123	0.00961538	0.00388199	0.00156055	0.00135699	0.000581734	0.0130762
Atp8b5	0	0	0	0.00124844	0.00250522	0	0.00457888
Atp9a	0.0653218	0.144231	0.0939441	0.053995	0.329958	0.184991	0.537446
Atp9b	0.054755	0.0288462	0.0372671	0.0371411	0.0348643	0.0471204	0.12746
Atpaf1	0.0355427	0.0576923	0.0380435	0.0362047	0.0643006	0.0360675	0.120151
Atpaf2	0.0518732	0.0384615	0.056677	0.0365169	0.0409186	0.0343223	0.116893
Atpif1	0.864553	0.884615	0.881211	0.915418	0.73904	0.965678	0.960023
Atr	0.0317003	0.0480769	0.0248447	0.0405743	0.0292276	0.0360675	0.112271
Atraid	0.404419	0.451923	0.317547	0.498752	0.531942	0.495637	0.428389
Atrip	0.0682037	0.0192308	0.0372671	0.0271536	0.0366388	0.0477022	0.0682429
Atrn	0.0326609	0.0384615	0.060559	0.0686642	0.140084	0.0709715	0.233611
Atrnl1	0.00384246	0.0673077	0.015528	0.00873908	0.00386221	0.0116347	0.079602
Atrx	0.180596	0.173077	0.231366	0.184457	0.192171	0.186736	0.301986
Atxn1	0.0710855	0.0384615	0.136646	0.102372	0.0924843	0.0965678	0.254128
Atxn10	0.205572	0.201923	0.117236	0.144195	0.167119	0.198371	0.296922
Atxn1l	0.0211335	0.0192308	0.0395963	0.0177903	0.0366388	0.0203607	0.0428389
Atxn2	0.0739673	0.0865385	0.0869565	0.106742	0.166284	0.0965678	0.240215
Atxn2l	0.102786	0.0576923	0.117236	0.101436	0.101879	0.0890052	0.250693
Atxn3	0.0201729	0.0288462	0.0271739	0.0109238	0.0319415	0.0104712	0.0518205
Atxn7	0.0537944	0.0576923	0.0838509	0.0667915	0.0277662	0.0267597	0.0916656
Atxn7l1	0.0480307	0.0384615	0.0411491	0.0387016	0.0281837	0.0180337	0.141373
Atxn7l2	0.0115274	0	0.0139752	0.0184145	0.00949896	0.0069808	0.0376436
Atxn7l3	0.0326609	0.0576923	0.0512422	0.0259051	0.0468685	0.0343223	0.179677
Atxn7l3b	0.491835	0.663462	0.614907	0.59176	0.805532	0.801629	0.723154
AU019823	0.0422671	0.0384615	0.060559	0.0371411	0.0584551	0.0372309	0.0765201
AU020206	0.0854947	0.00961538	0.0178571	0.00374532	0.000417537	0.00116347	0.0012768
AU021092	0	0.00961538	0.112578	0	0	0.000581734	0.000308194
AU022252	0.0259366	0.0288462	0.0559006	0.0387016	0.0582463	0.0506108	0.0884515
AU022754	0.00192123	0	0.000776398	0.00156055	0.000313152	0.000581734	0.00466693
AU023762	0	0	0	0.00062422	0.000208768	0	0.00224541
AU040320	0.0288184	0.0192308	0.0302795	0.03402	0.065762	0.0343223	0.118302
AU040972	0	0	0	0.00062422	0.00584551	0.000581734	0.000396249
AU041133	0.0144092	0.00961538	0.011646	0.0115481	0.0136743	0.0215241	0.0543741
Auh	0.116234	0.125	0.13587	0.112672	0.277453	0.1274	0.280236
Aunip	0	0	0.000776398	0.00062422	0.000835073	0.000581734	0.00228944
Aup1	0.269933	0.115385	0.138199	0.137953	0.203132	0.129145	0.197288
Aurka	0	0	0.00232919	0.00218477	0.00386221	0.00407213	0.00303791
Aurkaip1	0.32853	0.442308	0.385093	0.315543	0.467432	0.346713	0.6045
Auts2	0.0518732	0.346154	0.120342	0.27216	0.175887	0.120419	0.425615
AV099323	0.0067243	0.00961538	0.00931677	0.00374532	0.00365344	0.00116347	0.00180513
Aven	0.0307397	0.0192308	0.0333851	0.017166	0.208559	0.0215241	0.0425307
Avil	0.0134486	0.0192308	0.011646	0.0168539	0.0148225	0.0139616	0.0230265
Avl9	0.0432277	0.0576923	0.0830745	0.0399501	0.0729645	0.0482839	0.196055
Avp	0.00192123	0	0.0015528	0.00062422	0.000730689	0	0.00488707
Avpi1	0.0480307	0.0865385	0.132764	0.0720974	0.0573069	0.052356	0.16911
Avpr1a	0	0.0192308	0.000776398	0.00062422	0.000521921	0.000581734	0.0131643
AW011738	0.0067243	0	0.0667702	0.0121723	0.000939457	0.00232693	0.00294985
AW112010	0.0451489	0	0.138199	0.00031211	0.000417537	0.00232693	0.000704442
AW121686	0	0	0	0	0.000208768	0	0.00427068
AW146154	0.0172911	0.00961538	0.0178571	0.0134207	0.0188935	0.0069808	0.0320081
AW209491	0.0480307	0.0384615	0.0574534	0.0449438	0.0460334	0.0488656	0.166116
AW495222	0.00288184	0.00961538	0.00388199	0.00405743	0.00386221	0.0162885	0.0208691
AW549877	0.049952	0.0769231	0.0791925	0.0736579	0.088309	0.0645724	0.132215
AW551984	0.0259366	0.0576923	0.0395963	0.0287141	0.0253653	0.0343223	0.319244
AW554918	0.00960615	0.0288462	0.0217391	0.00967541	0.0188935	0.00639907	0.0438515
Axdnd1	0	0	0.000776398	0.00593009	0.000208768	0	0.00149694
Axin1	0.0326609	0.0288462	0.0559006	0.0134207	0.030167	0.0162885	0.0454365
Axin2	0.00768492	0.0865385	0.109472	0.011236	0.0141962	0.0250145	0.0616387
Axl	0.0288184	0.288462	0.217391	0.0980025	0.00741127	0.0488656	0.00986219
AY036118	0.0134486	0.0288462	0.0186335	0.0252809	0.0200418	0.0273415	0.0710606
AY074887	0.00480307	0	0.00310559	0.00249688	0.000939457	0.0017452	0.00757276
Azi2	0.105668	0.0961538	0.121894	0.0702247	0.117328	0.0686446	0.234976
Azin1	0.149856	0.105769	0.0993789	0.0901998	0.0919624	0.0948226	0.174878
Azin2	0.0163305	0.0576923	0.0403727	0.0259051	0.0100209	0.0372309	0.109849
B130006D01Rik	0.0278578	0.00961538	0.0108696	0.00811486	0.00521921	0.00581734	0.0322282
B130046B21Rik	0	0	0	0.00031211	0.000417537	0.00116347	0.00488707
B230110G15Rik	0	0	0	0.00031211	0.000104384	0	0.00110069
B230112J18Rik	0	0	0	0.00374532	0.000417537	0.00232693	0.00118875
B230118H07Rik	0.0979827	0.105769	0.10559	0.132647	0.258768	0.122164	0.16277
B230208H11Rik	0.00192123	0	0.00465839	0.00468165	0.00104384	0.000581734	0.00343416
B230209E15Rik	0.0710855	0.0576923	0.0737578	0.0770911	0.0941545	0.169866	0.523621
B230217C12Rik	0.0557157	0.0961538	0.0776398	0.0611735	0.0817328	0.0738802	0.298507
B230217O12Rik	0.0182517	0.0288462	0.0186335	0.0162297	0.0188935	0.0209424	0.130586
B230219D22Rik	0.295869	0.307692	0.450311	0.192572	0.461691	0.211169	0.472681
B230303O12Rik	0.000960615	0.00961538	0.0015528	0.00593009	0.00281837	0.00290867	0.011183
B230307C23Rik	0.0172911	0.0865385	0.0209627	0.0234082	0.0236952	0.0186155	0.0502796
B230311B06Rik	0.0067243	0	0.00698758	0.0702247	0.0110647	0.00756254	0.00726456
B230312C02Rik	0.0259366	0.0192308	0.0364907	0.0343321	0.027453	0.0221059	0.0983137
B230317F23Rik	0.00384246	0	0.00310559	0.00717853	0.00187891	0.00465387	0.0299828
B230322F03Rik	0.00192123	0.00961538	0.0124224	0.00499376	0.00709812	0.0052356	0.0216616
B230323A14Rik	0.00576369	0	0.00543478	0.0702247	0.00354906	0.00232693	0.0049311
B230334C09Rik	0.00576369	0.0192308	0.015528	0.0118602	0.00626305	0.0447935	0.185665
B230344G16Rik	0.000960615	0.00961538	0.00388199	0.00156055	0.0653445	0.00232693	0.00352221
B230354K17Rik	0.012488	0.00961538	0.0209627	0.0277778	0.0265136	0.0471204	0.079646
B230369F24Rik	0.0115274	0.00961538	0.0240683	0.0149813	0.0158664	0.0122164	0.0609783
B230398E01Rik	0.00192123	0	0	0.00124844	0.00104384	0.000581734	0.00272971
B2m	0.989433	0.519231	0.521739	0.286829	0.128392	0.354857	0.172236
B3galnt1	0.0816523	0.0192308	0.0458075	0.0143571	0.0385177	0.0605003	0.215119
B3galnt2	0.00768492	0.0192308	0.0263975	0.0118602	0.0120042	0.0145433	0.0361467
B3galt1	0.00480307	0	0.0163043	0.0262172	0.0256785	0.0122164	0.106063
B3galt2	0.00768492	0	0.0139752	0.117041	0.011691	0.0162885	0.0985779
B3galt4	0.0432277	0.00961538	0.0124224	0.0121723	0.0257829	0.0151251	0.0298067
B3galt5	0.0220941	0.00961538	0.0178571	0.022784	0.177453	0.00581734	0.0724695
B3galt6	0.037464	0.0192308	0.0256211	0.0308989	0.0402923	0.0605003	0.137454
B3gat1	0.024976	0.0288462	0.0271739	0.028402	0.0965553	0.123909	0.218421
B3gat2	0.0288184	0.00961538	0.0263975	0.0308989	0.022547	0.193717	0.181438
B3gat3	0.112392	0.182692	0.125	0.121723	0.197599	0.110529	0.444239
B3glct	0.0220941	0.0288462	0.0163043	0.0230961	0.0160752	0.0325771	0.0836966
B3gnt2	0.00192123	0.00961538	0.0217391	0	0.00532359	0.00116347	0.0155858
B3gnt4	0.00288184	0	0.00388199	0.00374532	0.0173278	0.00465387	0.0176111
B3gnt5	0	0	0.0015528	0.00062422	0.000521921	0.0157068	0.0046229
B3gnt6	0	0	0.000776398	0	0.000417537	0.00116347	0.00400652
B3gnt7	0.00384246	0	0	0.00093633	0.000208768	0.0279232	0.00510721
B3gnt8	0.00480307	0.0384615	0.00698758	0.00124844	0.000417537	0	0.00215735
B3gnt9	0.00576369	0.0865385	0.0194099	0.00156055	0.0944676	0.00639907	0.0237749
B3gntl1	0.00192123	0	0.00776398	0.0062422	0.00605428	0.00639907	0.0121516
B430010I23Rik	0.0691643	0.0384615	0.148292	0.0246567	0.145094	0.00290867	0.0793819
B430218F22Rik	0	0	0.0015528	0.00062422	0.000417537	0.00116347	0.00660415
B430219N15Rik	0.000960615	0	0.0015528	0.00124844	0.000417537	0	0.00114472
B430305J03Rik	0.000960615	0	0.000776398	0.00031211	0.000417537	0.00116347	0.00264166
B4galnt1	0.067243	0	0.0186335	0.0193508	0.0203549	0.104712	0.192577
B4galnt4	0.00960615	0.00961538	0.0217391	0.0127965	0.0114823	0.0209424	0.187954
B4galt1	0.174832	0	0.0380435	0.00967541	0.00125261	0.000581734	0.0115793
B4galt2	0.0115274	0.0192308	0.0388199	0.0308989	0.0227557	0.0482839	0.122969
B4galt3	0.107589	0.0384615	0.0512422	0.0477528	0.0553236	0.08726	0.172192
B4galt4	0.101825	0.0769231	0.168478	0.0440075	0.0147182	0.0668994	0.076432
B4galt5	0.0201729	0.00961538	0.0419255	0.0221598	0.00668058	0.026178	0.173645
B4galt6	0.131604	0.0865385	0.0753106	0.0658552	0.0516701	0.139616	0.489455
B4galt7	0.0326609	0.0384615	0.0287267	0.0390137	0.0323591	0.04363	0.134769
B4gat1	0.113353	0.201923	0.106366	0.174157	0.211691	0.183246	0.298243
B630019A10Rik	0.00192123	0	0.0015528	0.0062422	0.000626305	0.00116347	0.00294985
B630019K06Rik	0.110471	0.182692	0.118789	0.111423	0.13904	0.152414	0.533043
B830012L14Rik	0.00384246	0	0.0139752	0.00561798	0.000939457	0.0133799	0.251354
B830042I05Rik	0	0	0.000776398	0	0.000104384	0	0.00435874
B930025P03Rik	0	0	0	0.00156055	0.000835073	0.000581734	0.00625193
B930036N10Rik	0.504323	0.182692	0.0815217	0.0093633	0.00741127	0.0354857	0.0960683
B930082K07Rik	0.00288184	0	0.0147516	0.00187266	0.00605428	0.00116347	0.0198124
B930094E09Rik	0	0	0.0015528	0.00062422	0.00135699	0.00116347	0.00184916
B9d1	0.0259366	0.0576923	0.0706522	0.0867665	0.0770355	0.0197789	0.130014
B9d1os	0.000960615	0.00961538	0.00232919	0.00093633	0.00156576	0.0151251	0.00250958
B9d2	0.0912584	0.0865385	0.0854037	0.0655431	0.0580376	0.0471204	0.194338
Baalc	0.0662824	0.0673077	0.0628882	0.287141	0.0577244	0.122164	0.211861
Babam1	0.142171	0.0961538	0.170807	0.0877029	0.174635	0.101222	0.21098
Babam2	0.110471	0.0961538	0.0923913	0.0727216	0.155428	0.0930774	0.115529
Bace1	0.0268972	0.0576923	0.0892857	0.0552434	0.20501	0.0791158	0.174217
Bace2	0.00192123	0.00961538	0.00621118	0.0118602	0.0670146	0.00407213	0.0191961
Bach1	0.0710855	0.0384615	0.064441	0.011236	0.0286013	0.0186155	0.0301149
Bach2	0.0259366	0.00961538	0.0256211	0.0237203	0.0298539	0.0453752	0.0551666
Bad	0.178674	0.201923	0.239907	0.14201	0.20167	0.136126	0.311408
Bag1	0.433237	0.221154	0.401398	0.218477	0.283925	0.192554	0.58931
Bag2	0.0134486	0.00961538	0.0372671	0.0152934	0.0126305	0.0238511	0.0686391
Bag3	0.0489914	0.0673077	0.0784161	0.0443196	0.0487474	0.0191972	0.0245674
Bag4	0.0566763	0.0769231	0.0473602	0.0524345	0.0746347	0.0587551	0.240567
Bag5	0.0826129	0.0865385	0.136646	0.0574282	0.0925887	0.0756254	0.154889
Bag6	0.110471	0.0769231	0.145186	0.0861423	0.133194	0.0954043	0.185092
Bahcc1	0.00864553	0.0192308	0.0217391	0.00967541	0.0192067	0.0319953	0.0404174
Bahd1	0.00864553	0.0288462	0.0186335	0.00967541	0.00835073	0.0127981	0.0370273
Baiap2	0.0413064	0.0480769	0.100155	0.0527466	0.0235908	0.0575916	0.216264
Baiap2l1	0	0	0.0139752	0.00031211	0.000521921	0	0.00220138
Baiap2l2	0	0	0.00931677	0	0.000730689	0.0017452	0.00633998
Baiap3	0.0653218	0.0769231	0.0768634	0.0549313	0.0507307	0.054683	0.420332
Bak1	0.0720461	0.0384615	0.0799689	0.0390137	0.0503132	0.0732984	0.0440717
Bambi	0.0153698	0.0288462	0.0675466	0.0221598	0.0154489	0.026178	0.0308634
Banf1	0.167147	0.163462	0.25	0.112047	0.193841	0.124491	0.226786
Banf2os	0	0	0.0015528	0.00031211	0.00271399	0.000581734	0.000704442
Bank1	0.0614793	0	0.000776398	0	0.000313152	0.000581734	0.00202527
Banp	0.0653218	0.0673077	0.0729814	0.0418227	0.0596033	0.063409	0.131731
Bap1	0.0393852	0.0480769	0.064441	0.0346442	0.0420668	0.0418848	0.141461
Bard1	0.00384246	0.00961538	0.0015528	0.00093633	0.00281837	0.00639907	0.014265
Barhl1	0	0	0	0.00031211	0.000208768	0	0.00237749
Barhl2	0.000960615	0	0.000776398	0.00124844	0.000626305	0	0.00510721
Barx2	0.00864553	0.0288462	0.0124224	0.00998752	0.0507307	0.0203607	0.0771364
Basp1	0.892411	0.634615	0.534161	0.671348	0.439875	0.908668	0.86871
Batf	0.0240154	0	0.00621118	0	0.000104384	0	0.000176111
Batf3	0.113353	0	0	0.00062422	0.000521921	0.00116347	0.000880553
Bax	0.334294	0.211538	0.309783	0.223471	0.343006	0.319953	0.313961
Baz1a	0.117195	0.00961538	0.0240683	0.00343321	0.0026096	0.00407213	0.000792498
Baz1b	0.126801	0.144231	0.176242	0.0848939	0.120355	0.0692263	0.218157
Baz2a	0.0509126	0.0961538	0.0923913	0.0446317	0.0491649	0.0424666	0.115529
Baz2b	0.0893372	0.105769	0.169255	0.0914482	0.20595	0.0674811	0.142297
BB031773	0	0	0.0015528	0	0.000104384	0	0.00435874
Bbc3	0.14025	0.00961538	0.0357143	0.0062422	0.0156576	0.0180337	0.052525
Bbip1	0.152738	0.125	0.16382	0.139513	0.242902	0.131472	0.201735
Bbof1	0.00768492	0.0192308	0.011646	0.0287141	0.0146138	0.0133799	0.0634879
Bbox1	0.00480307	0	0.00776398	0.0549313	0.00501044	0.0034904	0.00589971
Bbs1	0.00960615	0.00961538	0.0124224	0.0162297	0.0133612	0.0127981	0.0600977
Bbs10	0.00288184	0	0.00931677	0.00561798	0.00386221	0.00988947	0.0208691
Bbs12	0.00480307	0	0.00465839	0.00468165	0.00177453	0.0034904	0.0202967
Bbs2	0.0230548	0.0576923	0.0232919	0.0287141	0.0234864	0.0110529	0.0687272
Bbs4	0.0268972	0.0865385	0.0395963	0.0337079	0.0387265	0.0447935	0.168714
Bbs5	0.0105668	0.0384615	0.0131988	0.0181024	0.0159708	0.0122164	0.0705763
Bbs7	0.0163305	0.00961538	0.0139752	0.0115481	0.0104384	0.0191972	0.047726
Bbs9	0.108549	0.0192308	0.0163043	0.00749064	0.0152401	0.00988947	0.0409897
Bbx	0.0826129	0.0576923	0.135093	0.0427591	0.155846	0.0465387	0.145467
BC002059	0.00864553	0.00961538	0.011646	0.0131086	0.00908142	0.00814427	0.0228944
BC003331	0.0912584	0.0480769	0.0854037	0.0593009	0.0887265	0.0651542	0.16506
BC003965	0.123919	0.0865385	0.156056	0.102684	0.191023	0.106457	0.240919
BC004004	0.153698	0.0961538	0.127329	0.108926	0.247599	0.118092	0.21917
BC005537	0.196926	0.211538	0.231366	0.138889	0.240814	0.158232	0.327302
BC005561	0.0768492	0.144231	0.115683	0.13764	0.158455	0.177429	0.205257
BC005624	0.230548	0.134615	0.184783	0.14201	0.321921	0.144852	0.321798
BC016548	0	0	0	0.00468165	0.00365344	0	0.000220138
[truncated: 15,039 more rows]

## Sheet: p-values
	Microglia	VLMCs	Stromal	Astrocytes	Oligodendrocytes	OPCs	Neurons
0610005C13Rik	1	1	1	5.11436e-14	5.99065e-05	0.30401	5.43233e-10
0610009B22Rik	9.31496e-23	0.400296	1.58558e-18	3.38157e-191	2.11346e-112	2.07905e-117	0
0610009O20Rik	0.00154459	1	1.40297e-07	1.80886e-67	2.8437e-42	4.67707e-50	2.12839e-153
0610010F05Rik	9.31072e-22	1	3.61888e-21	6.06677e-134	2.32607e-191	1.40649e-65	0
0610010K14Rik	9.52606e-36	1	9.29116e-22	1.38896e-165	5.82498e-111	1.65068e-100	0
0610012G03Rik	2.25299e-20	1	4.51884e-17	2.54531e-60	1.25724e-148	1.99718e-52	4.86922e-267
0610030E20Rik	1.71176e-10	1	9.4522e-05	1.01853e-138	5.9839e-87	1.64431e-70	0
0610037L13Rik	3.64826e-10	1	2.1767e-10	9.33732e-159	4.60461e-80	2.77144e-95	0
0610038B21Rik	6.88604e-07	6.68279e-25	1	NA	1.27493e-15	NA	3.49011e-22
0610039K10Rik	3.90197e-73	1	8.97958e-13	NA	7.09582e-40	NA	NA
0610040B10Rik	2.75168e-07	1	1.54916e-09	6.69247e-83	1.54268e-49	3.99421e-49	4.78278e-217
0610040F04Rik	1	1	0.141363	1.45882e-10	8.64059e-33	0.0017178	2.57864e-75
0610040J01Rik	0	1	2.97011e-07	2.33868e-05	2.18824e-67	8.27714e-60	0
0610043K17Rik	0.77408	1	0.100943	1	9.69674e-18	0.00127498	7.35398e-28
1010001B22Rik	1	1	1	1.56882e-24	1.34381e-30	0.00015069	3.13726e-55
1110002L01Rik	0.000260965	1	1.51174e-05	3.05766e-40	2.43182e-43	9.64054e-20	1.097e-139
1110002O04Rik	1	1	0.00258088	1	0.0336658	1	NA
1110004E09Rik	1.5577e-17	1	8.94085e-11	4.26269e-128	4.62904e-100	2.93072e-72	0
1110004F10Rik	9.17615e-23	1	0.332926	2.04895e-41	1	1.03996e-44	1.13406e-35
1110006O24Rik	1	1	1	9.84533e-06	0.101445	0.00400893	NA
1110008F13Rik	2.31702e-06	1	9.62854e-11	7.36772e-171	7.80862e-50	2.98682e-108	0
1110008L16Rik	1	1	2.53619e-10	7.77611e-21	1.05672e-34	4.79099e-13	6.99588e-80
1110008P14Rik	1.44397e-31	1	1.82028e-20	1.03518e-104	3.43759e-158	4.19422e-63	0
1110012L19Rik	2.02702e-07	1	2.27738e-06	1.91863e-84	9.14003e-53	1.58297e-60	3.52158e-231
1110015O18Rik	1.46396e-07	1	0.155585	4.27898e-12	4.12781e-63	3.07894e-07	2.46535e-130
1110017D15Rik	3.15851e-12	1	5.13595e-19	1.7051e-39	6.02966e-154	4.80561e-36	0
1110019D14Rik	1	1	1	1.40616e-21	7.28268e-07	1.47752e-09	NA
1110020A21Rik	1	1	1	1	2.45309e-23	0.00931984	2.1405e-23
1110032A03Rik	2.25906e-42	0.0421564	5.44472e-34	2.06707e-233	2.76212e-118	4.36406e-126	0
1110032F04Rik	5.35722e-05	1	0.0617087	2.08966e-25	1.98014e-85	1.3508e-14	1.41248e-167
1110034G24Rik	0.0101683	1	9.62444e-21	1.01315e-76	4.31153e-48	1.14579e-59	1.70436e-222
1110035H17Rik	0.0207781	1	0.00274615	2.06183e-32	6.25068e-96	1.16952e-12	8.13758e-152
1110038F14Rik	5.00299e-11	1	1.25294e-14	9.90158e-140	1.4369e-81	7.28277e-107	0
1110046J04Rik	9.7758e-16	1	8.13231e-13	8.92905e-69	1.91368e-39	1.89618e-46	5.90666e-184
1110051M20Rik	7.05334e-49	0.975997	7.53055e-48	2.64367e-193	7.37611e-263	2.80625e-105	0
1110059E24Rik	2.53624e-30	1	3.02172e-34	1.03965e-169	4.09896e-201	4.55553e-95	0
1110059G10Rik	3.47485e-07	1	2.81395e-14	6.58334e-103	5.46758e-70	1.08704e-51	0
1110065P20Rik	1.08193e-60	1	3.91927e-16	7.41478e-157	5.07389e-24	3.38371e-72	2.20247e-162
1190002N15Rik	2.53589e-07	1	1.17357e-07	3.12417e-51	3.48203e-50	5.92477e-31	6.93373e-121
1190005I06Rik	4.40602e-37	1	4.97167e-23	1.00355e-51	0	4.90147e-58	0
1190007I07Rik	3.78768e-16	1	2.40353e-19	4.14417e-141	3.71438e-146	1.42357e-86	0
1300002E11Rik	5.32813e-06	1	1.36694e-05	2.94576e-48	3.92859e-43	4.99827e-30	1.54487e-135
1300014J16Rik	2.77797e-07	1	1	1	1.51153e-06	2.39187e-05	5.63825e-06
1300017J02Rik	6.84709e-33	2.6761e-61	NA	1.34485e-136	NA	NA	NA
1500002C15Rik	1	1	1	7.39558e-09	1.83303e-23	0.0897434	1.4912e-51
1500009C09Rik	9.36321e-68	0.0986934	5.49165e-76	1.82601e-99	0	7.52784e-66	0
1500009L16Rik	1.73954e-57	1	4.25798e-20	2.11592e-236	0	1.18221e-100	0
1500011B03Rik	1.40095e-134	1	7.72588e-131	1.69517e-275	0	6.10741e-78	0
1500011K16Rik	0.493602	1	1.21692e-10	1.39919e-128	3.31814e-05	1.63006e-89	1.23231e-174
1500015A07Rik	1.14719e-13	1	1.44778e-05	1.45064e-65	2.69859e-110	4.07293e-33	1.431e-269
1500015L24Rik	6.63273e-15	1	1	8.03358e-13	4.28311e-219	4.39446e-17	1.17731e-194
1500035N22Rik	1	1	0.188916	0.00337165	3.35142e-22	3.92698e-06	2.41473e-53
1520401A03Rik	1	7.53381e-22	1.33265e-40	1	1.83965e-10	2.48141e-32	1.25541e-07
1600002K03Rik	0.0607234	1	0.000119718	2.54962e-56	9.30779e-74	3.19743e-29	1.07726e-183
1600010M07Rik	0	1	NA	9.08223e-27	2.13206e-81	2.2769e-139	0
1600012H06Rik	2.15579e-06	1	1	3.0227e-70	1.87856e-34	5.31892e-35	1.33507e-122
1600014C10Rik	1.22009e-12	1	2.30335e-14	2.28312e-130	6.23168e-231	1.60481e-73	0
1600014C23Rik	0.00578956	1	NA	5.44922e-07	0.00792232	NA	1
1600020E01Rik	1.40442e-07	1	3.52648e-26	4.31059e-84	3.85404e-62	2.5856e-53	1.0963e-271
1700001C02Rik	1	1	1	1	NA	NA	NA
1700001F09Rik	3.93925e-11	1	1	4.58687e-119	5.94966e-30	0.177932	2.67141e-66
1700001L19Rik	1.18928e-38	0.00253346	1.26204e-52	6.47689e-136	0	7.06275e-90	0
1700001O22Rik	0.00175731	1	0.0111029	3.69937e-22	3.83058e-63	2.93706e-23	2.14077e-140
1700003E16Rik	2.72517e-07	1	1.00907e-05	1.74406e-22	2.7488e-93	9.14824e-14	9.72611e-200
1700003F12Rik	0.000229357	1	1	0.145481	4.05249e-51	6.77099e-05	1.31064e-69
1700003L19Rik	2.12597e-19	1	1.38365e-25	4.26854e-126	0	NA	5.76051e-78
1700003M07Rik	1	1	1	1.15152e-07	0.149676	1	8.05787e-12
1700007G11Rik	9.16277e-06	1	1	0.963093	5.25547e-38	2.57062e-23	8.28902e-65
1700007K13Rik	0.00581067	1	1	4.2143e-191	6.77445e-56	2.54928e-10	2.21909e-168
1700008O03Rik	2.13563e-10	1	5.84345e-13	2.42464e-53	1.8492e-104	6.32065e-32	1.38016e-282
1700010I14Rik	1	1	1	0.000149849	9.08821e-09	0.138738	1.95699e-31
1700011D18Rik	1.81433e-12	1	1	0.000760548	2.5945e-09	1	1.77358e-19
1700011I03Rik	6.20401e-47	1	5.049e-69	0.969933	1.86102e-30	1.12688e-67	8.89919e-90
1700012B09Rik	2.57296e-05	1	0.00215341	5.21724e-12	1.79378e-46	2.37002e-10	1.30674e-95
1700012C14Rik	1	1	1	1	1.63687e-11	1	3.41962e-20
1700013F07Rik	1.95008e-16	1	1	1	3.81284e-43	7.07219e-40	1.01595e-81
1700015F17Rik	1	1	1	2.53852e-86	9.63697e-07	1	5.11429e-29
1700016D06Rik	2.5463e-28	1	8.62755e-80	4.42538e-18	1.87251e-20	8.06656e-117	5.01606e-80
1700016K19Rik	0.0156314	1	1.10481e-05	2.31523e-20	2.25837e-57	2.62627e-11	9.37835e-134
1700017B05Rik	4.8223e-184	1	1	9.50232e-06	2.44658e-41	0.0281849	1.82569e-74
1700017N19Rik	2.85886e-16	1	8.34112e-64	8.40171e-07	1.36764e-30	1.84274e-05	4.98219e-78
1700018L02Rik	1	1	1	0.0366044	2.9145e-05	1	3.57701e-18
1700019D03Rik	2.64646e-18	1	1.08045e-14	4.19696e-63	6.22777e-20	1.95962e-52	1.03237e-156
1700019L13Rik	1	1	2.00734e-06	4.6896e-06	3.06241e-11	0.00995722	3.64868e-23
1700020D05Rik	1	1	1	NA	NA	1	2.19223e-06
1700020I14Rik	7.31433e-26	1	1.66364e-11	4.88298e-137	1.88527e-200	6.49138e-72	0
1700020L24Rik	1	1	1	4.02831e-07	1.87355e-97	8.02848e-05	4.75317e-53
1700021F05Rik	7.80222e-20	1	3.46754e-16	1.66528e-151	1.46199e-190	4.26597e-85	0
1700021N21Rik	5.78456e-08	1	8.11987e-69	0.00361629	3.93061e-27	1.34201e-72	4.58444e-82
1700023F06Rik	3.56111e-49	0.556001	3.84399e-41	3.49566e-149	0	3.21265e-91	0
1700025G04Rik	7.84694e-68	0.00127725	5.06392e-55	2.33976e-258	6.16613e-234	1.6945e-154	0
1700026J14Rik	1	1	1	1	1	1	4.68485e-06
1700027A07Rik	6.67839e-05	1	1	1	1.40593e-05	2.24465e-12	1.51785e-15
1700028J19Rik	1	1	1	0.00244867	1	1.12915e-06	0.0765038
1700028K03Rik	1	1	1	4.58574e-06	2.19584e-16	0.0116167	3.14495e-42
1700028P14Rik	2.89458e-09	1	8.20904e-20	1	5.2405e-23	6.11777e-18	3.5756e-43
1700029I15Rik	1	1	1	1.30105e-10	5.91621e-20	7.45332e-06	3.76454e-40
1700029J07Rik	6.00242e-08	1	0.0605164	3.52339e-75	4.15125e-20	4.90531e-15	2.12392e-103
1700030C14Rik	3.10062e-09	1	1.30132e-12	0.232829	4.73893e-23	1	3.38448e-28
1700030J22Rik	0.480307	1	0.0207162	7.55643e-10	3.00662e-44	2.24574e-08	8.03267e-97
1700030K09Rik	0.0192484	1	0.699578	2.49164e-42	4.23498e-41	9.99485e-19	2.81583e-134
1700031P21Rik	4.86306e-41	1	1.57261e-09	0	4.27771e-87	7.07894e-117	2.68727e-70
1700034H15Rik	1	1	1	0.336339	4.69355e-08	1	4.70206e-21
1700034I23Rik	7.10294e-11	1.22293e-25	4.22918e-64	NA	0.0316347	NA	2.72963e-05
1700034P13Rik	1	1	1	1	1	1	1
1700037C18Rik	3.79073e-06	1	2.73323e-12	1.88117e-49	6.75645e-42	1.91865e-35	7.44335e-165
1700037H04Rik	7.13162e-64	9.02558e-06	8.3898e-49	5.06606e-207	0	3.86268e-119	0
1700040D17Rik	1	1	1	3.64171e-07	0.481421	0.026421	1.56393e-21
1700041G16Rik	0.51	1	1	NA	1.87523e-11	NA	2.11379e-30
1700047I17Rik2	1	1	1	1	1.67291e-09	1	0.0789147
1700047M11Rik	4.6949e-42	1	2.34529e-33	3.08238e-89	0	3.57969e-22	0
1700048O20Rik	4.49349e-07	1	0.000410408	1.27848e-34	6.11982e-109	3.44913e-19	4.1304e-211
1700052K11Rik	1	0.466998	3.67147e-06	4.19311e-32	1.33844e-65	4.68064e-23	7.71409e-165
1700054M17Rik	1.04446e-07	1	3.9141e-36	4.34183e-49	3.2043e-25	3.35976e-21	1.3867e-53
1700055D18Rik	1	1	0.581857	0.775971	8.31857e-08	1	1.55163e-18
1700056E22Rik	1	1	1	1	0.000498897	1	1.23663e-11
1700056N10Rik	1.79157e-07	0.00980043	1	1	0.000778599	1	1.24567e-06
1700058P15Rik	1.38311e-24	1	NA	NA	3.08859e-66	NA	6.74096e-09
1700060C20Rik	1.89973e-22	1	7.25835e-88	1.57753e-06	1.79986e-42	2.89502e-80	6.8766e-68
1700061G19Rik	8.72263e-24	9.47938e-60	NA	1	3.47503e-17	9.05613e-135	1.14166e-18
1700063D05Rik	4.09258e-19	1	1.15389e-23	2.88085e-77	0	2.94955e-53	0
1700064M15Rik	0.000289737	1	1	1	2.38913e-17	0.0425982	7.00183e-46
1700065D16Rik	0.163032	1	1	4.89267e-05	1.87964e-07	0.0131718	1.6612e-15
1700066B19Rik	3.04423e-05	1	0.0394518	3.47131e-20	2.9824e-33	2.00038e-08	1.21428e-62
1700066M21Rik	5.83578e-08	1	6.39097e-06	1.67875e-45	7.77119e-65	2.47096e-28	2.69462e-174
1700069B07Rik	4.86534e-12	1	1	0.000326295	4.37927e-24	8.55433e-31	8.24907e-11
1700084E18Rik	1	1	1	2.50732e-07	0.061864	0.655323	5.03157e-25
1700086O06Rik	1.05639e-10	1	1.62849e-07	9.65774e-59	3.85911e-93	5.31252e-38	1.38662e-245
1700088E04Rik	0.00144882	1	0.0123844	1.83779e-50	1.17718e-56	2.37855e-17	6.14842e-169
1700093K21Rik	1	1	1	3.36224e-09	2.40978e-39	1	2.82743e-68
1700095J03Rik	3.05446e-07	1	0.0600937	1	1.47391e-81	1.04963e-05	7.43435e-61
1700096K18Rik	0.000195146	1	0.800096	1.12573e-51	4.04289e-44	1.08223e-18	8.04785e-119
1700102H20Rik	1	1	0.0405689	1	1	1	1
1700102P08Rik	1	1	1	0.0243421	6.43826e-09	1	8.71085e-09
1700105P06Rik	1	1	1	1.82467e-06	3.8951e-23	0.0259284	3.61146e-40
1700109H08Rik	1	1	1	1	0.122809	1	4.16652e-05
1700112D23Rik	1	1	1	0.556409	1	1.30226e-05	4.59867e-16
1700112J16Rik	0.231063	1	0.0595094	2.8536e-27	2.43652e-47	2.45489e-09	2.27591e-118
1700113A16Rik	1	1	1	NA	5.86361e-55	4.99838e-07	8.66521e-64
1700123J17Rik	0.000259229	1	6.51644e-75	NA	4.78227e-41	3.41262e-07	6.75082e-56
1700123O20Rik	1.06066e-11	6.13631e-10	1.42005e-07	2.85923e-158	3.06046e-79	1.85324e-77	0
1700124L16Rik	1.25387e-10	1	4.96075e-13	1.61845e-52	2.43657e-165	3.32488e-26	0
1700125G22Rik	4.00855e-15	1	2.18271e-48	0.715778	0	1.16952e-59	6.97828e-70
1700125H20Rik	1	1	1	1	0.0709736	1.61236e-13	1.61125e-06
1810009A15Rik	0.00223877	1	1	3.28411e-08	1.04677e-30	8.91234e-07	3.89791e-76
1810010D01Rik	0	5.27695e-180	NA	NA	NA	NA	NA
1810010H24Rik	1.44302e-08	1	6.98645e-05	1.47758e-31	3.99691e-83	1.72163e-48	1.38077e-166
1810011H11Rik	0	1	4.50926e-155	0	0	3.42103e-133	0
1810013D15Rik	8.82919e-07	1	1	5.3164e-40	NA	NA	3.0157e-11
1810013L24Rik	3.50611e-18	1	3.26136e-08	6.6192e-148	5.34026e-120	9.55278e-63	0
1810020O05Rik	1	1	1	1	0.000839148	1	6.90699e-10
1810021B22Rik	0.118877	1	0.203275	8.31326e-14	8.38431e-11	3.15592e-06	1.52495e-62
1810022K09Rik	9.80874e-19	1	9.43161e-30	5.92214e-201	4.24848e-121	2.43586e-120	0
1810024B03Rik	1	0.0651607	1	5.51405e-06	2.98572e-09	0.554814	5.3397e-39
1810030O07Rik	3.35661e-06	1	0.0137081	1.34049e-68	2.43146e-64	9.87584e-46	3.91875e-205
1810032O08Rik	0.0143658	1	0.035154	4.28439e-41	4.05779e-65	1.67032e-29	3.56421e-180
1810037I17Rik	7.51811e-24	1	0.000130546	2.42362e-11	0	8.51374e-15	0
1810041H14Rik	1	1	1	1	4.37434e-09	0.0676303	2.23025e-26
1810041L15Rik	4.42306e-34	1	1.44898e-25	1.35414e-99	0	1.37289e-157	0
1810043G02Rik	4.72139e-36	0.000161962	6.66791e-42	1.68453e-219	3.95701e-252	2.43104e-118	0
1810044D09Rik	1	1	1	3.13462e-35	4.74449e-12	0.000297583	1.34209e-22
1810055G02Rik	6.0442e-06	1	1	7.7863e-40	5.8399e-12	7.62183e-41	NA
1810058I24Rik	7.40935e-05	0.00667066	6.54886e-09	1.73001e-158	0	4.96677e-78	0
1810062G17Rik	1	1	1	1	4.20424e-25	1.43456e-10	4.13234e-23
1810062O18Rik	1	1	4.01793e-05	1	1.0726e-10	1	2.20259e-28
2010005H15Rik	9.67823e-08	1	0.751913	2.37984e-30	1.55639e-48	1.15503e-10	2.41053e-110
2010007H06Rik	1	0.00917031	2.04203e-10	0.099177	1.38117e-13	9.17435e-19	NA
2010013B24Rik	4.56221e-177	1	2.98563e-64	0	3.78701e-94	NA	NA
2010015M23Rik	5.72411e-05	1	1.52666e-05	6.05551e-29	1.58866e-38	1.77928e-16	2.3975e-116
2010107E04Rik	8.88919e-13	1	1	1.40646e-67	7.00907e-13	7.51696e-15	1.0733e-19
2010109A12Rik	0.00107713	1	1	5.22143e-32	2.88209e-73	2.8922e-17	1.32285e-146
2010111I01Rik	1.67603e-28	1	0	2.36234e-113	4.77865e-92	1.12055e-49	5.35881e-256
2010300C02Rik	9.52416e-08	1	1.74178e-12	4.77141e-44	5.61652e-123	2.9593e-39	1.0203e-269
2010308F09Rik	3.13189e-16	1	0.182345	1	5.04643e-16	2.56729e-33	3.64718e-30
2010315B03Rik	0.00195763	1	0.0406692	1.25663e-73	5.39647e-74	1.40497e-29	5.10911e-190
2010320M18Rik	1.14932e-08	1	4.03815e-09	5.81337e-85	8.70707e-77	1.07939e-59	9.76643e-295
2200002D01Rik	1	1	1.21718e-87	0.427509	0.000951596	1	1.35655e-18
2210008F06Rik	0.00133032	1	1	2.82648e-06	2.2296e-34	0.000284443	1.31707e-71
2210011C24Rik	1	1	1	2.12616e-20	3.73402e-25	6.94473e-12	2.34081e-74
2210016F16Rik	7.44113e-38	1	5.55471e-06	8.66668e-109	9.43575e-171	5.91798e-59	0
2210016L21Rik	2.3689e-49	1	1.00199e-33	2.5422e-80	1.87611e-86	6.13176e-35	3.34994e-284
2210406O10Rik	6.26418e-05	1	0.0626418	1.3176e-34	3.34303e-39	2.13141e-19	1.1282e-115
2210408I21Rik	3.52274e-07	1	0.000107999	5.7587e-54	6.99548e-40	2.27111e-18	8.92546e-146
2300009A05Rik	2.26214e-41	0.0193899	4.91921e-21	1.37275e-198	9.24621e-213	3.28286e-109	0
2310001H17Rik	1	1	1.10538e-10	0.000528259	2.96689e-38	0.00243509	5.31004e-42
2310009B15Rik	2.84603e-42	0.114557	1.49332e-39	2.76381e-189	0	2.34105e-111	0
2310011J03Rik	9.44258e-11	0.000920409	1.40603e-05	1.15298e-101	8.3851145754942e-313	1.27845e-59	0
2310016G11Rik	4.26328e-11	1	2.86506e-16	0.782658	3.21688e-28	NA	3.44153e-56
2310022A10Rik	3.4403e-15	1	3.13093e-09	1.37885e-93	1.03122e-122	9.7183e-54	0
2310022B05Rik	1.79776e-18	1	8.95958e-24	0	0	3.32707e-53	0
2310026L22Rik	2.65649e-296	5.20469e-37	2.09527e-154	1.04695e-75	2.46835e-101	0	3.04667e-297
2310030G06Rik	1	1	1.26493e-05	1.17833e-07	7.01045e-33	0.0739152	8.29091e-60
2310033P09Rik	1.88433e-13	1	7.9808e-11	1.13011e-181	9.12142e-173	1.91542e-109	0
2310034G01Rik	0.0233426	1	0.754496	1.02669e-10	3.34634e-22	2.83609e-09	5.73817e-76
2310034O05Rik	0.0382614	1	1	1	4.23367e-25	5.43835e-35	1.12896e-49
2310035C23Rik	1.88377e-44	1	1.07757e-32	1.0623e-198	1.14509e-244	6.9727e-107	0
2310039H08Rik	3.76873e-12	1.43283e-09	2.42088e-20	7.93193e-110	3.98502e-41	1.01847e-47	6.81609e-216
2310040G07Rik	1	1	0.360641	9.07013e-36	2.39189e-27	0.0508259	3.54493e-48
2310040G24Rik	6.37506e-21	1	0.367825	7.42442e-16	1.98927e-39	1.64873e-11	1.68829e-82
2310047D07Rik	1	1	1	1	0.0204831	0.130401	2.53725e-05
2310057M21Rik	1.07972e-19	1	7.93644e-12	2.13197e-108	2.76198e-123	5.87154e-50	0
2310061I04Rik	5.1589e-48	0.00291264	2.0521e-30	2.62507e-201	0	4.83716e-112	0
2310068J16Rik	0.0157574	1	1	5.22191e-26	3.49103e-19	3.25226e-14	1.9447e-72
2310074N15Rik	0.000179149	1	0.060841	7.47326e-30	7.27318e-33	4.73999e-13	1.76508e-102
2410002F23Rik	5.73826e-21	0.0119514	6.49291e-30	3.80148e-173	1.3621e-193	3.84387e-103	0
2410004B18Rik	6.45142e-36	0.0252137	8.63484e-37	1.93275e-190	2.50566e-165	9.43774e-121	0
2410004I01Rik	1	1	0.00369816	0.00293303	8.05515e-24	0.00167503	1.76223e-39
2410004P03Rik	7.18747e-09	1	1	NA	6.56008e-14	0.568012	5.16675e-25
2410015M20Rik	7.99934e-43	0.0250288	1.77304e-50	2.30953e-17	0	2.27997e-06	0
2410018L13Rik	0.000154631	1	8.75899e-07	1.01923e-34	2.53613e-92	3.11246e-16	6.40964e-206
2410080I02Rik	1	7.5555e-05	8.67138e-13	6.85124e-05	1.71574e-06	0.00117829	1.70187e-37
2410089E03Rik	5.74441e-62	1	4.33688e-42	1.50006e-194	0	4.54665e-107	0
2410131K14Rik	1.10526e-17	1	9.70436e-19	4.82872e-98	3.95672e-171	1.29881e-61	0
2510002D24Rik	8.45961e-36	1	1.40382e-23	5.23046e-188	0	2.48933e-120	0
2510009E07Rik	3.63785e-10	1	2.27783e-08	5.50577e-108	1.38552e-56	3.8998e-56	1.75942e-244
2510017J16Rik	1	1	1	3.3699e-08	1.23825e-09	0.0116223	3.03919e-28
2510039O18Rik	9.5166e-14	1	2.70192e-06	3.5424e-67	2.07605e-40	1.83039e-39	3.04017e-167
2510046G10Rik	1	1	2.7964e-09	1.03252e-13	4.41909e-07	3.73999e-05	5.85023e-50
2600006K01Rik	0.000149475	1	0.00229479	2.46127e-19	4.07119e-62	6.29615e-11	3.07153e-137
2600014E21Rik	1	9.38439e-51	1.67291e-15	0.00426539	5.92699e-45	1	2.35285e-19
2610001J05Rik	1	1	0.000688918	1.46315e-95	1.03185e-222	7.41774e-82	1.18454e-253
2610002M06Rik	7.53785e-27	1	1.48056e-24	3.56955e-137	1.54292e-246	4.21976e-75	0
2610008E11Rik	6.55463e-08	1	1	3.27272e-65	8.54978e-38	2.68156e-46	7.71259e-153
2610020C07Rik	1	1	1	9.43762e-05	9.86822e-17	0.00102171	5.58299e-46
2610021A01Rik	1	1	0.0206291	1.26399e-21	1.24939e-27	2.75374e-15	1.44917e-99
2610027F03Rik	1	1	1	4.16376e-06	1.62483e-06	1	2.06549e-13
2610028E06Rik	1.44336e-06	1	0.000214346	2.24631e-05	1.10088e-67	5.82061e-09	2.11643e-119
2610035D17Rik	1.03337e-14	1	2.40229e-16	4.21407e-86	1.03108e-65	2.63751e-68	0
2610037D02Rik	3.885e-05	1	0.0013962	1.52191e-88	5.11284e-99	2.50245e-33	1.98472e-248
2610042L04Rik	1	1	1	2.89581e-05	1.45439e-19	1	3.89053e-41
2610044O15Rik8	4.06375e-09	1	4.94775e-06	1.02425e-66	1.95359e-98	1.18387e-34	1.88587e-258
2610301B20Rik	3.01179e-36	0.0192429	4.09919e-30	1.55856e-145	8.76616e-230	7.17386e-82	0
2610318N02Rik	0.00519047	1	1	0.448142	5.88479e-50	0.000751632	5.89e-60
2610507B11Rik	2.44762e-31	0.0816717	1.19497e-17	4.67294e-187	2.77689e-225	9.45603e-114	0
2610524H06Rik	4.05003e-54	0.0153945	1.07451e-45	1.75794e-185	4.39914e-302	1.11261e-96	0
2610528A11Rik	0	1	5.86073e-08	8.74028e-26	1.03599e-75	1.48711e-72	0
2700012I20Rik	7.77404e-13	1	6.75824e-10	1	1.36432e-79	4.50943e-10	4.04243e-166
2700033N17Rik	0.305509	1	1	7.52057e-12	1.27791e-31	0.000263752	9.27491e-69
2700038G22Rik	1	1	0.000498914	3.69819e-31	4.90055e-40	1.69944e-13	1.36776e-115
2700046A07Rik	5.73216e-12	1	0.34324	9.09316e-25	0	1.09677e-25	0
2700046G09Rik	4.26843e-07	1	1.95792e-08	1.7155e-52	NA	6.93204e-23	2.28877e-110
2700049A03Rik	0.37872	1	0.000158754	2.31477e-35	1.34949e-32	1.51837e-16	5.28252e-110
2700062C07Rik	7.61875e-16	1	6.20546e-17	2.55895e-120	1.82196e-90	2.29539e-71	0
2700069I18Rik	4.57068e-24	0.0831023	8.54954e-08	1.30403e-11	6.57701e-64	2.6631e-12	1.42237e-142
2700081O15Rik	0.00297312	1	0.0410731	2.08231e-51	3.2652e-86	4.81063e-17	9.42471e-183
2700097O09Rik	1.21145e-25	1	1.82082e-19	2.59148e-117	3.27198e-78	1.42935e-71	0
2810001G20Rik	1.62043e-38	1	9.13486e-28	9.89609e-156	8.40814553660768e-311	1.70183e-95	0
2810004N23Rik	2.03614e-19	1	4.30564e-32	3.48511e-185	2.6155e-95	1.43389e-110	0
2810006K23Rik	0.000810592	0.0844643	0.0326074	9.3601e-78	4.37645e-52	4.9033e-52	2.29423e-200
2810021J22Rik	0.691255	1	1	7.90221e-33	3.1115e-43	1.03328e-24	1.79094e-125
2810032G03Rik	8.80184e-05	1	5.54063e-10	3.28293e-31	6.32004e-84	2.5263e-23	2.22963e-189
2810049E08Rik	0.0773661	2.44711e-09	1	9.21832e-05	1.61626e-24	0.0445071	1.42843e-43
2810402E24Rik	7.72195e-06	1	0.00485716	1.21815e-52	2.99608e-26	5.02788e-41	3.93895e-118
2810403A07Rik	6.07491e-18	1	7.39288e-09	2.36347e-166	7.38526e-201	1.39849e-65	0
2810405F17Rik	1	1	1	1.3705e-27	2.33204e-32	2.5846e-09	1.78976e-63
2810414N06Rik	0.31014	1	0.0328554	0.0451018	1.15316e-13	6.06586e-07	3.68537e-23
2810429I04Rik	5.1323e-06	1	0.00369452	6.33955e-27	4.07672e-119	7.34277e-12	2.56416e-68
2810454H06Rik	1.29243e-08	1	4.81105e-22	7.91504e-57	1.66621e-116	7.22857e-29	1.40456e-220
2810455O05Rik	1	1	0.432128	7.31924e-06	0.00245437	1	7.96859e-26
2810457G06Rik	0.0994957	1	1	4.04251e-08	4.09367e-20	1.00598e-08	1.44156e-51
2810459M11Rik	1	1	0.613789	2.90615e-44	2.70662e-20	1.81723e-08	4.9582e-44
2810474O19Rik	3.1747e-19	0.212677	6.91513e-12	6.99331e-88	6.01482e-73	6.84467e-43	5.0567e-247
2900009J06Rik	0.00644062	1	1	1.82243e-12	5.09218e-49	2.7102e-06	4.20418e-106
2900011O08Rik	9.48445e-81	0.104287	1.16958e-83	4.747e-175	0	1.05783e-40	0
2900026A02Rik	7.41808e-08	1	1.07485e-176	3.93097e-39	1.17114e-111	6.79057e-28	5.52214e-243
2900045O20Rik	1	1	1	1	7.64596e-18	0.00310552	1.0822e-34
2900052N01Rik	1	1	1	2.053e-250	6.32014e-19	0.00141675	1.23922e-126
2900055J20Rik	2.40939e-39	1	3.9676e-30	5.41652e-150	8.51099e-191	2.63309e-53	0
2900060B14Rik	4.62257e-65	1	1	7.32108e-67	8.4212e-227	4.83587e-24	7.57610142645884e-319
2900072N19Rik	1	0.000263975	NA	3.21656e-06	9.54187e-12	1	6.27079e-08
2900076A07Rik	7.3171e-19	1	3.67127e-09	3.39997e-98	3.64383e-72	6.81685e-44	1.0681e-261
2900079G21Rik	1.3678e-06	1	4.19116e-10	8.60325e-31	3.34696e-121	3.59066e-17	4.02249e-247
2900089D17Rik	1	1	1	NA	0.0388053	1	4.77269e-19
2900093K20Rik	2.0181e-24	1	2.24525e-12	5.68881e-100	1.55393e-88	1.61031e-52	4.85013e-301
2900097C17Rik	1.78614e-111	9.84915e-06	9.32215e-96	6.40351e-198	0	2.98968e-135	0
3100002H09Rik	0.00287255	1	8.30197e-17	0.188675	1.08426e-24	4.36568e-33	NA
3100003L05Rik	2.63041e-24	1	1.73084e-51	2.18713e-167	1.47485e-40	2.24043e-56	3.76119e-118
3110002H16Rik	1	1	0.000550214	1.36067e-36	3.57961e-26	7.29182e-18	4.00128e-89
3110006O06Rik	1	1	1	1	0.34871	1	9.6162e-06
3110009E18Rik	0.00625769	1	1	5.81362e-22	NA	2.7347e-20	6.56656e-62
3110021N24Rik	2.11817e-44	1	4.33489e-23	1.23538e-115	9.17075e-87	4.01334e-65	0
3110035E14Rik	1.02256e-07	1	0.000635626	0.0815161	4.90123e-75	0	7.52083e-187
3110040N11Rik	1.58932e-19	1	4.56387e-12	7.98861e-104	6.52008e-160	4.37678e-62	0
3110043O21Rik	8.94553e-12	1	4.78913e-06	1.6213e-79	2.08939e-94	4.5375e-59	9.95863e-274
3110045C21Rik	1	1	0.381724	1	1.01078e-09	1	1.12697e-21
3110062M04Rik	1.1995e-07	1	8.60534e-13	1.60626e-49	4.74532e-38	5.04556e-35	4.01922e-125
3110070M22Rik	1	1	1	0.194925	0.0245061	1	1.09996e-15
3110079O15Rik	1	1	1	0.000957628	0.00143921	1	1.26002e-11
3110082I17Rik	0.0104574	1	3.9565e-07	6.15337e-34	8.05622e-64	1.53398e-19	1.14956e-176
3110082J24Rik	0.111354	1	0.0016688	2.25645e-74	2.6934e-195	2.2418e-11	1.28407e-269
3110099E03Rik	4.82904e-91	1	1.79958e-238	6.33654e-15	1.24159e-182	NA	7.12249e-206
3222401L13Rik	9.336e-07	5.85926e-07	8.36932e-11	3.28655e-96	3.51075e-32	5.10574e-23	3.88947e-138
3300002I08Rik	1	1	1	3.51373e-07	NA	0.000368039	3.06948e-11
3300002P13Rik	1.10835e-15	1	8.06375e-30	NA	7.18986e-20	1.14084e-38	2.92122e-50
3632451O06Rik	2.45098e-32	1	1.59534e-27	2.07538e-118	0	0	0
3830406C13Rik	7.24124e-35	1	2.81203e-12	6.51608e-184	3.52819e-144	1.40219e-108	0
3930402G23Rik	5.47694e-28	1	6.19601e-31	NA	1.48829e-23	6.73512e-105	2.07405e-26
4430402I18Rik	4.63706e-51	1	5.59021e-12	1.35792e-98	0	0	0
4631405J19Rik	3.26075e-11	1	2.23466e-13	1	2.35922e-20	4.59842e-34	9.71272e-22
4632404H12Rik	0.143749	1	1	2.62757e-33	1.09559e-29	1.11946e-18	5.73795e-98
4632411P08Rik	1	1	1	1	0.00012543	1	5.24435e-18
4632415L05Rik	6.5117e-22	1	2.11669e-15	2.24841e-162	1.41957e-193	1.05855e-79	0
4632428C04Rik	1	1	1	0.0147804	1.14082e-16	1	3.96807e-29
4732414G09Rik	0.0056048	1	0.000815692	1.30348e-31	5.90721e-54	2.56413e-09	1.01085e-117
4732419C18Rik	1	1	1	0.0883355	4.67944e-05	1	3.32286e-16
4732440D04Rik	2.25533e-05	1	0.342444	1.41084e-57	1.87493e-66	3.97903e-19	1.62858e-153
4732463B04Rik	1	1	0.219745	6.55416e-13	1.04885e-49	1.62429e-06	7.50959e-102
4732471J01Rik	0.000160918	1	0.161885	4.66365e-26	6.07704e-34	4.68113e-13	1.32543e-89
4732491K20Rik	5.41381e-11	1	4.3849e-14	1.63705e-85	4.44199e-106	1.76229e-37	1.87926e-276
4732496C06Rik	1.15764e-08	1	0.00906899	6.90803e-36	1.53338e-70	1.60392e-16	6.57607e-164
4831440D22Rik	1	1	1	1	0.00288848	1	0.937546
4831440E17Rik	1	1	1	1.4001e-29	6.68045e-13	0.642495	2.06773e-46
4833412C05Rik	5.27652e-05	1	NA	4.46111e-223	4.63212e-06	8.90738e-65	7.07364e-20
4833413G10Rik	1	1	1	0.0015161	1.88975e-06	1	1.7486e-15
4833418N02Rik	7.48302e-12	1	1	1	1	1	NA
4833420G17Rik	1.59473e-08	1	7.50663e-09	1.54449e-138	2.66876e-93	5.79379e-75	0
4833422C13Rik	0.0162256	1	2.79062e-09	8.78796e-30	1.04609e-64	8.59567e-14	2.28647e-138
4833427G06Rik	1.98635e-21	1	0.0030106	2.55573e-256	5.87862e-69	3.71301e-70	1.16811e-80
4833439L19Rik	3.63244e-29	0.0308904	2.21373e-16	1.14956e-208	6.22815e-217	1.19298e-119	0
4833445I07Rik	1.09463e-191	1	0.000793916	9.13403e-09	9.07202e-59	3.43491e-07	2.41263e-53
4921504A21Rik	1.83608e-05	1	4.94539e-09	3.80581e-17	1.12473e-19	9.26824e-08	2.06692e-62
4921507P07Rik	1	1	1	0.102586	7.69435e-09	1	2.44013e-20
4921516A02Rik	1	1	1.54263e-06	1.92154e-52	0.021834	1	8.04229e-12
4921524J17Rik	8.51027e-08	1	2.88195e-27	2.33539e-94	8.05498e-142	1.67964e-64	0
4930402H24Rik	1.78519e-75	1	5.54908e-38	0	1.97244e-85	1.38545e-111	0
4930403P22Rik	1	1	1	6.49414e-07	2.60643e-18	0.000157064	2.20491e-40
4930404N11Rik	1	1	1	0.000703931	1.81358e-25	1	4.5547e-45
4930408O17Rik	1	1	1.62256e-30	4.06338e-154	9.23173e-12	8.80068e-39	0.00029625
4930412M03Rik	7.49478e-20	4.42654e-07	NA	NA	NA	8.57784e-88	NA
4930413F20Rik	1	1	1	0.000104549	7.47006e-29	0.369308	1.07566e-50
4930426D05Rik	0.000540929	1	0.0624532	6.7934e-24	5.82942e-70	6.38296e-12	2.06891e-148
4930426I24Rik	1	1	1	1	1	1	7.81166e-07
4930426L09Rik	1	1	NA	1	0.0376391	1	1
4930430F08Rik	2.13183e-11	1	2.31867e-05	1.2036e-78	2.2721e-47	6.96379e-44	2.5138e-183
4930432K21Rik	1	1	1	0.122215	0.0777763	1	1.6851e-17
4930434B07Rik	3.13419e-48	1	1.82609e-133	0	0	8.04669e-182	3.33583e-270
4930444M15Rik	1	1	1	3.81213e-12	1.22961e-44	1.39813e-09	1.03913e-71
4930444P10Rik	1	1	0.26723	1.06445e-05	2.35816e-26	2.5463e-06	1.13848e-49
4930447C04Rik	6.93974e-27	1	4.9974e-19	2.86317e-88	3.22224e-302	2.14152e-41	0
4930451I11Rik	7.5586e-12	1	6.77118e-63	7.48426e-123	2.1341e-40	0.125447	1.65056e-81
4930452B06Rik	0.0006811	1	1	1.01474e-14	1.70755e-55	8.01572e-08	8.99454e-115
4930452G13Rik	2.68847e-06	1	1	9.17199e-57	5.52699e-22	1	1.02187e-19
4930453N24Rik	1.22606e-05	1	0.00151776	5.79711e-67	6.72807e-46	1.8313e-29	1.63223e-166
4930455G09Rik	1	1	1	0.00661139	2.46177e-26	1.05882e-20	6.4043e-12
4930458D05Rik	1	1	1	1	2.75609e-27	0.0153829	5.95998e-51
4930461C15Rik	7.06265e-15	1	2.64813e-13	1	1	1	1.28759e-06
4930480K23Rik	1	1	1	1	1	NA	0.00401491
4930481A15Rik	1	1	0.8254	9.22792e-20	5.41784e-24	4.97102e-07	3.38729e-69
4930484H19Rik	3.65478e-300	6.56955e-42	5.54355e-61	NA	1.97836e-20	3.76319e-267	6.1653e-138
4930488L21Rik	1	1	0.22265	4.42393e-18	5.38419e-07	0.00438185	1.86617e-42
4930500F10Rik	2.95075e-09	1	1	2.66065e-51	1.37423e-19	3.00176e-21	8.21379e-41
4930500L23Rik	0.0133104	1	3.13465e-05	2.71075e-10	1.87468e-61	5.19047e-09	4.87059e-126
4930500M09Rik	1.14499e-15	1	0.528246	1.69378e-05	3.98282e-31	3.48377e-38	8.65997e-37
4930502E18Rik	4.05421e-09	1	1	0.00865406	1.51737e-28	6.12614e-38	9.36237e-67
4930503L19Rik	1	1	1.77599e-10	6.77866e-23	2.73719e-15	4.65713e-13	3.23299e-66
4930507D05Rik	0.0029114	1	1	0.763417	7.68697e-26	1	9.72172e-50
4930509G22Rik	1	1	1	1	2.27893e-06	1	1.40158e-09
4930513N10Rik	1	1	0.430068	4.52841e-05	1.70508e-20	0.335987	8.35867e-33
4930515G01Rik	1	1	1	1.38952e-25	0.040749	1	1.7171e-07
4930518I15Rik	1	1	1	2.753e-29	2.47176e-41	6.99902e-08	1.44591e-85
4930519A11Rik	1	1	1	1	0.0204245	1	4.67913e-09
4930522L14Rik	1	1	1	0.00171048	2.05531e-11	0.00732621	6.45116e-26
4930523C07Rik	1	1	0	2.2875e-10	4.7929e-68	1	3.52381e-195
4930524B15Rik	0.00015777	1	0.0729822	0.246086	4.01673e-36	8.59049e-70	2.24354e-45
4930524J08Rik	0.245265	1	1	0.000288435	3.36117e-20	0.259668	3.11492e-47
4930524O07Rik	1	1	7.99242e-07	1	0.000379148	1	1.08309e-08
4930525G20Rik	3.26814e-16	1	1	1	6.96782e-25	0.00252106	9.09815e-56
4930528G23Rik	1.47054e-21	1	5.20523e-56	5.88169e-161	0	2.78503e-69	0
4930532G15Rik	2.56727e-13	1	9.82592e-07	1.92521e-77	2.99645e-265	3.17414e-37	0
4930537H20Rik	7.67993e-08	1	1	1	6.61924e-12	1	1.85164e-08
4930539E08Rik	1	1	0.331884	1.19357e-10	1.14005e-34	0.000280007	5.26625e-78
4930539J05Rik	2.80207e-07	1	1	1.08324e-09	1.73859e-05	4.43065e-08	5.53282e-46
4930540M05Rik	3.45046e-09	1	5.25632e-15	1.50307e-07	5.75844e-34	1.7618e-50	8.04701e-58
4930544F09Rik	1.98489e-14	1	1.34793e-30	5.10066e-11	3.30762e-28	2.91381e-54	6.55953e-71
4930548H24Rik	1	1	1	1	0.000285224	1	0.478549
4930550C14Rik	1	1	0.551586	1	1.12804e-10	1	9.07425e-36
4930553P18Rik	1	1	0.875575	0.056646	9.00392e-16	0.00288756	4.14024e-40
4930555F03Rik	1.23925e-05	1	0.00014093	5.6052e-87	4.79218e-07	NA	1.22537e-15
4930558K02Rik	1	1	1	0.000914027	5.76265e-15	NA	7.17669e-31
4930565N06Rik	1	1	1.22806e-07	NA	NA	NA	NA
4930568G15Rik	1	1	0.00154964	0.543964	1.6744e-18	1	3.87552e-24
4930570G19Rik	8.74737e-13	1	5.71647e-16	1.04393e-63	4.48584e-116	5.60213e-38	1.26444e-294
4930579G24Rik	0.331045	1	1	0.355267	9.52513e-48	1.64997e-06	7.36144e-50
4930589L23Rik	1	1	1	1	0.000448643	1	2.78428e-09
4930590J08Rik	1	1	1	1.12851e-07	4.01792e-19	8.06078e-09	9.20556e-48
4930592C13Rik	1.57699e-11	1	4.11388e-46	0.0389348	2.7129e-28	6.62012e-26	1.31674e-49
4930593C16Rik	8.87523e-05	1	1	9.35433e-19	0.518893	1	2.14102e-09
4930594M22Rik	4.68282e-09	8.72418e-07	NA	1	3.86124e-07	3.63899e-22	NA
4930598A11Rik	1	1	NA	1.00223e-45	1.00128e-54	5.85947e-13	1.47434e-25
4931406C07Rik	0.00266258	1	1	3.24353e-75	2.0669e-22	4.32875e-43	7.38832e-157
4931406P16Rik	1.31475e-24	1	2.8982e-66	1.58169e-111	8.0557e-289	4.24112e-55	0
4931414P19Rik	1	1	1	0.177044	0.000220008	1	3.05218e-18
4931423N10Rik	1.27368e-79	9.02066e-79	5.84302e-256	3.58654e-257	1.81964e-44	0	3.26175e-170
4931428F04Rik	7.67274e-19	1	1.76217e-15	1.45199e-85	5.1527e-206	1.05367e-55	0
4931440F15Rik	1	1	1	1.62904e-16	3.72332e-39	5.04209e-07	6.22373e-85
4932422M17Rik	0.635865	1	1	2.69342e-26	1.03202e-50	4.9697e-10	1.13146e-95
4932435O22Rik	6.11539e-41	1	4.84143e-09	0	1.81542e-155	1.30688e-09	1.4917e-154
4932438A13Rik	3.54704e-69	0.497504	6.2837e-43	1.83513e-263	0	2.568e-134	0
4932438H23Rik	1	1	1	6.55791e-94	0.542245	1	1.94792e-48
4932443I19Rik	1	1	1	2.73235e-30	1.72442e-24	0.82618	1.50452e-35
4932443L11Rik	0.000397167	1	1	0.0843347	7.44662e-17	1.20593e-07	3.93586e-18
4932702P03Rik	0.00469775	1	NA	0.0218239	1.60453e-32	3.6796e-15	1.88346e-20
4933404O12Rik	0.000607539	1	0.0132978	1.23667e-28	2.16531e-38	1.22204e-12	3.81744e-119
4933405L10Rik	0.006686	1	2.9269e-30	1	1.37111e-12	7.18893e-23	1.84238e-30
4933406C10Rik	1	1	1	0.00492829	0.664943	0.0155882	7.27908e-21
4933406P04Rik	0.872068	1	1	0.0483352	1.51729e-25	0.480457	8.12609e-49
4933407L21Rik	1	1	1	7.46968e-34	3.24214e-50	7.89888e-10	3.9228e-103
4933408B17Rik	1	1	1	7.18079e-10	1.58002e-33	0.00120429	1.17458e-63
4933408J17Rik	0.000654278	1	NA	1.29021e-134	0	1.10517e-34	3.05882e-95
4933412O06Rik	1	1	1	1.44146e-07	7.69411e-31	3.31603e-05	2.87628e-67
4933415A04Rik	1	1	1	NA	2.86145e-11	1	2.39186e-15
4933417D19Rik	7.47069e-08	1	4.87979e-18	1	NA	NA	1
4933424G06Rik	1	1	1	3.98692e-07	1.33301e-27	1	4.78219e-56
4933427D14Rik	2.70036e-12	1	8.04024e-07	3.23444e-59	1.88918e-102	3.25518e-33	2.13402e-241
4933427E11Rik	0	1.84724e-98	NA	0	2.23119e-18	NA	0
4933428P19Rik	1	1	1	0.0129926	3.52491e-18	0.0668869	9.12041e-32
4933429H19Rik	1	1	1	1	0.137174	NA	0.0764783
4933431E20Rik	9.08102e-39	0.375532	4.22462e-22	3.18403e-119	4.79849e-297	1.86276e-60	0
4933433G15Rik	3.67136e-66	1	1	1	4.37454e-06	1	1
4933434E20Rik	2.40298e-30	1	7.53037e-44	5.56181e-170	4.94843e-35	2.14569e-96	3.42715e-293
5031425E22Rik	5.77047e-75	1	8.24111e-12	2.25527e-152	5.1305e-218	1.51667e-75	0
5031425F14Rik	3.38667e-05	1	0.000388348	1.79563e-11	5.08472e-78	2.80554e-06	2.43786e-145
5031439G07Rik	1.78801e-29	0.486885	4.00095e-43	0	0	1.68289e-112	0
5033403F01Rik	1	1	1	0.0119329	0.862578	4.17172e-05	1.62033e-09
5033406O09Rik	0.00739669	1	1	3.67446e-14	7.16182e-07	1.63499e-08	9.83258e-31
5033417F24Rik	1	1	1	6.46227e-06	9.44753e-15	0.000206272	7.03181e-49
5033426O07Rik	1	1	1	NA	1.76257e-29	0	1.04937e-112
5033430I15Rik	2.97168e-09	1	5.01407e-06	5.31032e-43	1.07885e-129	3.87443e-25	1.90719e-273
5330413P13Rik	1	1	1	6.95666e-05	2.65543e-10	1	2.84515e-33
5330416C01Rik	1.43684e-35	1	0.0764677	0	2.38835e-183	2.35112e-43	7.68669e-41
5330417C22Rik	1.28395e-36	1	1.01987e-42	2.13609e-132	0	1.17859e-61	0
5330434G04Rik	3.16119e-112	2.0463e-06	4.31516e-106	0	0	1.05064e-139	0
5330439A09Rik	1.78519e-12	1	2.51475e-95	NA	7.54759e-49	3.72749e-53	3.60257e-63
5430402O13Rik	9.48128e-05	1	1	1	NA	1	1
5430403G16Rik	1	1	1	2.10937e-08	5.38876e-05	3.55493e-09	6.66927e-34
5430416N02Rik	0.000231293	1	1.50683e-09	1.88228e-34	1.27234e-43	1.25332e-21	2.08908e-135
5430421F17Rik	2.29092e-20	0.370644	NA	3.06142e-166	3.69857e-32	0	3.03789e-32
5430427N15Rik	2.14682e-37	1.23913e-43	2.44148e-190	8.02629e-29	NA	0	6.92975e-25
5430431A17Rik	1	1	1	0.216741	0.000413841	1	1.0788e-07
5530401A14Rik	8.08731e-91	0.000271056	1	1	1.01472e-16	1.52292e-21	3.93326e-38
5730403I07Rik	0.988273	1	0.101525	8.49529e-138	5.43464e-170	8.18298e-28	7.90428e-122
5730409E04Rik	4.40043e-21	1	9.83164e-28	2.63585e-151	1.97485e-215	5.38564e-84	0
5730422E09Rik	1	1	1	0.012655	1.80011e-07	1	1.83847e-14
5730455P16Rik	1.25056e-39	1	2.32711e-38	7.98328e-184	3.11467e-235	1.3144e-98	0
5730480H06Rik	3.13186e-06	1	5.68647e-12	1.12693e-69	1.54393e-42	1.31555e-32	5.42848e-194
5730507C01Rik	1	1	1	1	0.0105649	1	3.8557e-10
5730522E02Rik	1	1	1	0.00242129	1.44588e-18	1	1.52866e-36
5730559C18Rik	0.0522849	1	1	1	5.2949e-23	4.58175e-173	5.98776e-95
5830418P13Rik	1.22386e-23	1	1.50768e-45	1.5772e-267	0	2.27007e-81	3.09258e-208
5830454E08Rik	1.31179e-05	1	0.507933	3.10021e-41	1.67182e-37	8.87663e-23	9.91175e-120
5830473C10Rik	1.38753e-38	1	1.0138e-162	6.00958e-07	0	9.70491e-179	1.45975e-229
5930412G12Rik	1	1	1	6.80267e-52	2.38901e-05	1	3.86319e-30
5930422O12Rik	1	3.56324e-16	2.67757e-33	1	2.43986e-14	1	1.02217e-10
5930430L01Rik	1.88049e-10	1	0.0208585	1.44749e-135	7.44252e-82	2.14506e-19	1.67118e-189
6030407O03Rik	0.205744	1	3.18572e-22	0.0020702	2.06695e-162	0.013081	2.43313e-131
6030408B16Rik	5.19473e-05	1	1	1	2.16537e-31	1	2.47384e-50
6030419C18Rik	2.73551e-43	1	3.18019e-36	1.58989e-158	0	1.48369e-74	0
6030443J06Rik	1	1	1	NA	0.0572495	4.41886e-10	3.69681e-24
6030445D17Rik	1	1	1	1	3.30398e-05	1	1.73061e-07
6030458C11Rik	1.95512e-18	1	2.30237e-18	1.06404e-112	2.67598e-192	3.73139e-63	0
6230400D17Rik	1.08501e-05	1	0.249199	5.34325e-47	6.78357e-45	1.35456e-22	6.20611e-128
6330403K07Rik	1.24036e-190	3.3278e-08	8.9795e-176	1.16164506276031e-312	0	6.57432e-130	0
6330403L08Rik	0.431121	1	2.58907e-18	1.10132e-22	1.80455e-10	6.20464e-09	1.88344e-64
6330403N20Rik	1	1	NA	0.00570187	1.62411e-07	2.56696e-26	1.54196e-07
6330409D20Rik	0.00139683	1	0.00652691	3.96226e-18	7.067e-57	7.13815e-10	3.07256e-120
6330418K02Rik	0.000963847	1	1.48198e-06	8.29199e-55	7.64599e-71	1.19249e-39	5.28464e-225
6330420H09Rik	3.06794e-16	1	4.09151e-95	1.24619e-245	2.57521e-14	2.89871e-62	4.35152e-66
6330562C20Rik	5.55871e-06	NA	NA	2.10634e-30	6.2546e-29	2.61795e-12	3.19237e-76
6330576A10Rik	0.00820449	1	1.46187e-29	1	6.30421e-29	1	3.56761e-46
6430503K07Rik	1	1	1	6.14274e-14	1.1059e-205	0.00500665	2.17404e-210
6430531B16Rik	1	1	1	3.56469e-07	1.44981e-28	0.00624389	4.948e-62
6430548M08Rik	4.06597e-52	0.664486	2.89946e-50	9.8742e-187	0	3.77368e-100	0
6430571L13Rik	0.00568427	1	0.271636	2.59585e-12	6.8481e-49	8.89225e-06	3.05999e-98
6430573F11Rik	4.57384e-09	1	1	9.94844e-143	1.22113e-73	1.74478e-17	1.69224e-165
6430573P05Rik	6.43984e-06	1	1	1	1.63616e-16	0.374406	5.76465e-43
6430584L05Rik	4.2541e-26	1	NA	NA	9.46262e-103	NA	2.86787e-61
6430628N08Rik	3.4335e-22	5.98306e-22	0.404597	1.08051e-06	2.52908e-55	0.275122	7.75628e-91
6430710C18Rik	1.14015e-25	1	1.78965e-45	8.26742e-217	0	4.88372e-65	0
6530403H02Rik	1.92031e-07	1	1	4.24187e-31	5.03503e-25	0.00905364	4.70181e-55
6530409C15Rik	1	1	1	0.00635744	2.16348e-50	0.00454971	3.43467e-25
6530437J22Rik	1	1	1	0.00374694	2.16124e-09	0.000297935	3.53733e-30
6720427I07Rik	1	1	1	8.30464e-41	2.67108e-42	4.6774e-06	7.65051e-70
6720483E21Rik	1	1	1	2.17812e-06	3.43635e-05	1	4.20105e-14
6720489N17Rik	1	1	1	1	0.00238065	1	1.52068e-17
6820408C15Rik	0.22724	1	0.20571	1.87253e-13	1.43119e-32	1.91335e-08	1.54104e-75
8030423F21Rik	0.000114624	1	1	1	3.05198e-21	0.717273	3.06465e-31
8430408G22Rik	2.64864e-12	1	0	1.37938e-15	8.61329e-61	5.49737e-98	0
8430432A02Rik	1	1	1	1	4.00398e-09	1	5.92937e-18
9030025P20Rik	1	1	1	3.31916e-17	1.10445e-16	3.66709e-17	1.14226e-56
9030612E09Rik	0.400855	0.929116	0.00621708	3.57749e-10	2.87392e-34	0.000907327	9.68697e-78
9030624G23Rik	1	1	5.56746e-11	0.00162821	2.32979e-08	1	2.11924e-27
9030624J02Rik	3.67551e-09	1	9.66423e-10	2.02752e-120	4.50897e-102	4.99507e-65	0
9130008F23Rik	1	1	9.96863e-25	1	4.39747e-50	1	NA
9130011E15Rik	1	1	NA	0.133485	0.00160346	0.419962	3.7233e-17
9130019O22Rik	1	1	1	4.82374e-15	2.82195e-13	8.39659e-07	7.52363e-52
9130213A22Rik	1	1	1	NA	2.75461e-08	NA	1.57771e-21
9130221H12Rik	1	1	1	1.50507e-11	1.8969e-18	1.20827e-06	6.69078e-56
9130230L23Rik	6.592e-56	1	NA	NA	6.55577e-12	1.58818e-56	NA
9130401M01Rik	5.4534e-24	1	1.83079e-20	1.20102e-162	1.26819e-151	5.63515e-103	0
9130410C08Rik	1	1	NA	1.19809e-42	1.42274e-34	3.89717e-08	1.29126e-10
9130604C24Rik	1	1	NA	1.93325e-05	6.31386e-05	0.256081	5.58761e-24
9230110C19Rik	1	1	0.250626	2.94123e-10	1.89179e-24	0.0558944	1.84014e-54
9230111E07Rik	0.0970526	1	1	NA	3.13475e-14	NA	2.42495e-23
9230112J17Rik	1	1.66445e-15	3.46918e-13	1	4.74144e-09	1.45947e-79	NA
9330020H09Rik	1	1	1	1.65986e-46	4.38338e-41	2.09424e-18	3.31258e-127
9330102E08Rik	1	1	1	0.00014206	7.7331e-15	1	1.83687e-33
9330104G04Rik	4.1481e-05	1	0.00031876	2.84592e-37	7.58537e-27	1.05033e-13	2.18225e-104
9330111N05Rik	1	4.77363e-07	1	3.27326e-161	1.62167e-41	7.62534e-58	4.66981e-19
9330121J05Rik	1	1	1	2.93896e-15	0.659805	NA	0.00744239
9330136K24Rik	1	1	1	0.000215936	1.51897e-18	0.0721657	4.15454e-40
9330158H04Rik	6.15306e-09	1	3.70211e-09	2.8808e-43	7.55759e-119	4.09359e-21	1.17819e-254
9330159F19Rik	1.73656e-80	5.91889e-05	8.52258e-61	4.17056e-205	8.78838e-195	4.15181e-133	0
9330160F10Rik	0.000328269	1	0.0376419	2.08424e-54	1.36058e-114	1.33017e-31	2.92106e-218
9330161L09Rik	1	1	1	1	1.3375e-05	NA	1.76105e-10
9330171B17Rik	1	1	1	5.04159e-06	4.44029e-17	0.217768	3.26911e-44
9330179D12Rik	0.0271854	1	0.0217627	4.39553e-11	1.25424e-37	1.11985e-07	1.14982e-87
9330182L06Rik	1.19315e-30	1	1.53935e-24	3.42092e-116	2.88663e-79	5.57367e-49	2.10872e-282
9330198I05Rik	0	1.47491e-108	1.16866e-19	8.90596e-53	5.92603e-68	4.0125e-104	2.30477e-232
9330198N18Rik	3.52577e-13	1	NA	1	0.00014419	3.20348e-28	3.69635e-18
9330199G10Rik	1	1	1	1	1.96815e-139	6.37054e-12	8.33089e-97
9430002A10Rik	1.65994e-10	1	4.34418e-12	2.37546e-07	NA	2.01992e-40	7.83924e-12
9430015G10Rik	0.614191	1	1	5.24629e-33	1.45685e-51	1.50065e-14	2.38859e-128
9430037G07Rik	1	1	1	1	5.72432e-09	1	2.09321e-18
9430038I01Rik	0.000148565	1	5.52915e-08	2.2828e-69	4.67583e-61	7.07145e-48	1.85614e-222
9430041J12Rik	0.0128206	1	1	3.10611e-145	2.56901e-40	0.000342655	6.35669e-113
9430060I03Rik	4.01061e-08	1	0.0425512	1.87692e-60	4.28168e-138	1.6403e-38	7.1273e-250
9430065F17Rik	1	1	1	4.7312e-15	4.83875e-09	0.000206558	1.14178e-29
9430078K24Rik	4.41449e-37	1	1.37447e-39	2.83293e-11	0	0.13519	2.85941e-173
9430085M18Rik	3.44227e-06	1	1	0.00522703	2.40098e-21	0.0550405	1.23627e-52
9430097D07Rik	1	1	1	0.221451	2.32228e-09	1	3.53241e-22
9530026P05Rik	1	1	0.558294	7.15641e-27	1.45422e-46	7.28281e-05	4.26489e-84
9530034E10Rik	1	1	1.2377e-19	1.8964e-16	3.23902e-25	0.0125239	8.41525e-68
9530036O11Rik	0.000466827	1	0.0143889	7.7646e-19	4.11784e-62	1.70869e-12	1.01846e-124
9530046B11Rik	3.81832e-07	1	1	NA	1.49488e-16	1	5.50457e-21
9530059O14Rik	5.62314e-94	0.00231013	6.17168e-90	0	0	5.73232e-136	0
9530068E07Rik	1.23163e-21	0.376538	1.44466e-23	3.8067e-229	2.29771e-167	7.1914e-117	0
9530077C05Rik	7.65555e-11	1	5.22285e-06	5.8884e-72	1.08857e-136	2.35699e-38	1.53234e-304
9530082P21Rik	0.00242583	1	1	4.19602e-30	2.69281e-60	5.57255e-27	5.65872e-134
9630001P10Rik	1	1	1	0.0127665	7.32977e-12	0.503499	4.96033e-31
9630002D21Rik	5.7544e-24	1	4.09694e-100	3.45747e-250	2.30925e-27	3.89152e-78	3.01876e-90
9630009A06Rik	0.274913	1	0.615001	0.0301194	2.35701e-277	2.09611e-29	2.5641e-294
9630013A20Rik	1	1.64326e-12	1	0.000848819	NA	2.75405e-31	6.40897e-06
9630028H03Rik	2.8529e-32	1	3.6123e-136	2.16164e-08	0	5.46821e-106	2.64016e-260
9630041A04Rik	8.77606e-23	0.00100548	NA	1	NA	NA	NA
9930004E17Rik	1.02185e-10	1	6.00268e-30	6.2231e-05	5.04632e-98	6.43906e-126	3.18047e-59
9930012K11Rik	0.526738	1	1	9.54628e-17	1.97956e-19	9.38616e-10	6.77065e-48
9930021J03Rik	2.92673e-39	1.25943e-09	2.13041e-27	2.72107e-206	1.05189e-218	1.88084e-102	0
9930104L06Rik	2.58894e-07	1	0.000991281	2.86044e-41	3.6695e-33	2.06773e-15	1.29198e-115
9930111J21Rik2	0	0.0180803	3.26423e-292	0	2.05289e-169	1.44449e-112	0
A030001D20Rik	1.17512e-21	1	5.08879e-15	4.0314e-66	6.5675e-149	2.87365e-33	0
A030005L19Rik	3.75887e-06	4.13658e-16	NA	1	0.0018114	1	0.205681
A130010J15Rik	1	1	1	1.29233e-38	4.08595e-59	7.98143e-34	5.80616e-161
A130077B15Rik	4.81261e-09	1	0.000163754	8.17155e-65	0.0168751	1	1
A230001M10Rik	0.0129493	1	0.0589081	2.99003e-26	0	1.2804e-14	0
A230005M16Rik	1	1	4.10249e-09	1	1.26056e-19	1	2.27619e-16
A230006K03Rik	6.30365e-37	1	1.43454e-44	6.25381e-137	0	7.55404e-64	0
A230009B12Rik	0.000759196	1	0.182496	8.17853e-30	0	4.01531e-18	0
A230050P20Rik	9.57677e-56	0.0405033	1.79822e-46	1.14222e-232	0	1.55481e-113	0
A230057D06Rik	6.90782e-44	0.0313	6.50243e-43	1.93717e-139	0	1.54251e-67	0
A230060F14Rik	1.0485e-07	1	0.0547426	7.79004e-26	NA	NA	9.61877e-14
A230065N10Rik	9.64131e-06	1	1	1	4.8829e-12	NA	3.4502e-12
A230072E10Rik	0.345178	1	0.0114053	1.03038e-30	5.65185e-46	3.30795e-07	2.25893e-106
A230077H06Rik	1	1	1	7.06979e-06	4.62977e-28	7.14939e-33	7.76197e-58
A230083G16Rik	0.0570966	1	3.68859e-26	1	0.000281656	0.0299808	7.62492e-25
A230083N12Rik	1	1	NA	1	3.81069e-18	1	2.68531e-09
A230087F16Rik	1.289e-22	1	3.13817e-23	1.38076e-84	5.2324e-289	1.46519e-41	0
A230107N01Rik	1	1	1	0.000381474	3.71371e-13	1	1.14771e-32
A2m	1	1	1	3.88089e-81	2.00603e-07	0.00118549	4.62297e-46
A2ml1	3.42916e-12	1	0.00592004	3.47417e-36	1.84842e-121	2.2098e-22	9.67816e-178
A330008L17Rik	0.000216529	1	0.108115	1.76549e-17	3.9088e-54	1.15609e-13	8.19441e-102
A330009N23Rik	0.00739138	1	4.34231e-06	2.12696e-07	4.15322e-33	2.23089e-10	1.92885e-75
A330015K06Rik	0.617102	1	0.143288	1.41108e-15	0	2.55268e-08	7.38751e-247
A330032B11Rik	7.12231e-29	1.40564e-29	6.897e-73	1	2.08226e-12	4.71827e-77	0.018864
A330033J07Rik	2.32082e-12	1	1	4.86568e-13	2.16085e-52	1	7.04539e-65
A330035P11Rik	9.15344e-11	1	NA	1	6.43078e-33	0.0440141	5.10638e-64
A330041J22Rik	0.0402731	1	3.74711e-09	2.44218e-37	4.41134e-62	1.68544e-13	4.59904e-155
A330048O09Rik	1	1	1	5.05077e-79	1.0412e-08	0.00700155	1.03732e-40
A330049N07Rik	1	NA	1	2.09826e-11	6.03144e-205	0.0343482	2.32206e-142
A330069E16Rik	1.59484e-41	0.824006	1.5847e-29	3.77065e-89	1.62199e-235	3.62023e-44	0
A330069K06Rik	6.12901e-117	7.31135e-57	8.84045e-231	9.04553e-146	5.65469e-54	0	0
A330070K13Rik	2.2809e-05	1	1	0.303468	1.16618e-37	3.88705e-22	6.19862e-66
A330074K22Rik	1	1	1	5.06941e-05	1.37858e-24	0.134415	8.08873e-50
A330076C08Rik	0.00605879	1	1	0	8.89139e-42	1.20765e-09	1.0112e-209
A330084C13Rik	0.00122002	1	1	2.05838e-06	1.93828e-43	0.0245097	1.48642e-84
A330087D11Rik	1	1	NA	6.00945e-48	0.00204982	1	2.01629e-10
A330094K24Rik	0.534452	1	0.298467	0.0807582	1.93641e-82	1	2.04631e-41
A330102I10Rik	0.000123059	1	8.76104e-07	4.72924e-35	2.60871e-89	3.95323e-36	7.1982e-183
A430005L14Rik	7.9752e-18	0.650151	8.14572e-31	2.74514e-156	1.13489e-186	1.1527e-104	0
A430027H14Rik	4.52015e-09	1	7.05185e-10	5.49887e-39	2.22524e-143	7.42e-32	2.7468e-279
A430033K04Rik	1.17741e-07	1	0.0118543	1.36859e-55	2.07247e-82	1.36694e-35	1.54193e-214
A430046D13Rik	0.000221429	1	0.000203904	7.64291e-52	4.59201e-47	7.06288e-31	3.6031e-163
A430057M04Rik	0.00187822	1	1	1	1.46782e-07	1	2.23211e-09
A430073D23Rik	1	1	NA	1	NA	1	1
A430078I02Rik	4.17258e-07	1	1	0.0507104	9.32682e-23	5.52459e-09	2.53932e-30
A430105I19Rik	1	1	3.54873e-24	NA	1.69639e-06	0.0553576	4.29643e-39
A430105J06Rik	1	1	1	8.58389e-23	3.01465e-31	0.00245868	5.02493e-56
A430106G13Rik	1	1	1	3.12682e-06	2.6079e-10	1.42258e-09	1.34302e-34
A430110L20Rik	0.014119	1	1	1	0.0819323	1	0.00867289
A4galt	1	7.15046e-12	1.03496e-203	0.00862187	4.15384e-14	1	1.16423e-51
A530017D24Rik	0.000166749	1	0.000241965	3.04242e-49	4.21011e-99	7.64427e-27	1.86122e-216
A530076I17Rik	5.59195e-09	1	NA	0.000192672	NA	NA	NA
A530095I07Rik	1.42204e-141	4.12656e-25	1	6.34107e-08	5.5522e-47	1	3.43984e-84
A630001G21Rik	0	1	0.00014011	0	0	5.65003e-21	0
A630023P12Rik	2.27338e-19	1	4.4468e-27	1.20611e-274	0	1.3504e-60	0
A630072M18Rik	1	1	0.00459885	5.15301e-18	1.42751e-11	4.37827e-07	2.91964e-42
A630089N07Rik	1	1	1	2.44025e-10	9.47728e-20	0.000630652	4.98936e-46
A730011C13Rik	1	1	1	1	0.0187323	1	1.7006e-09
A730015C16Rik	1	1	0.000271324	1	1	2.88278e-07	1
A730017C20Rik	4.29732e-60	0.00668514	8.45516e-89	3.45078e-185	0	5.23672e-51	0
A730035I17Rik	1	1	1.84512e-42	NA	9.01747e-05	9.06863e-13	1
A730046J19Rik	1	NA	0.968255	9.39585e-42	8.13207e-28	0.918783	3.31621e-61
A730049H05Rik	7.97058e-06	1	5.76853e-13	1.92938e-58	1.48083e-19	1	2.84778e-33
A730056A06Rik	1.13781e-05	1	1	1.38558e-19	0.000656578	1	NA
A730060N03Rik	0.0427106	1	1	1.90489e-09	6.19816e-54	1.47798e-16	5.03452e-99
A730063M14Rik	1	1	1	3.79138e-20	6.41019e-09	1.31288e-12	3.23013e-51
A730071L15Rik	1	1	1	0.115884	2.04262e-19	1	2.15089e-33
A730081D07Rik	0.00622707	1	1	8.8452e-05	1.25176e-33	0.021292	3.40272e-72
A730098A19Rik	1	1	3.67976e-07	2.5757e-18	5.33482e-44	1.67426e-10	1.89146e-113
A830005F24Rik	1	1	7.65121e-08	1	1	1	0.0105729
A830008E24Rik	6.78606e-182	1	1.13847e-44	1.63667e-59	1.1022e-80	8.93414e-57	2.38425e-287
A830009L08Rik	1	1	1	1.23795e-06	NA	1	NA
A830010M20Rik	3.32262e-35	0.109904	1.83147e-35	1.17051e-167	1.60443e-134	1.54802e-85	0
A830011K09Rik	1	1	1.33911e-08	1	1.11775e-15	0.196456	5.56489e-24
A830018L16Rik	6.75817e-36	1	4.54861e-29	6.87128e-129	0	4.24368e-68	0
A830019P07Rik	1	1	1	1.98272e-20	7.76275e-05	1	7.3279e-16
A830029E22Rik	1	1	NA	2.10497e-52	1.03642e-10	1.05117e-15	4.13214e-22
A830031A19Rik	1	1	1	1	0.00311962	1	5.12877e-06
A830035O19Rik	1	1	1	1	4.74366e-08	1	3.10519e-22
A830036E02Rik	1	1	1	1	0.0787383	1	6.74549e-09
A830052D11Rik	1	1	1	1.27516e-08	6.26142e-63	2.60223e-07	4.15229e-50
A830082K12Rik	2.41457e-11	1	0.019444	9.63856e-59	7.30895e-205	2.45059e-20	5.43898e-295
A830092H15Rik	7.16955e-10	2.06331e-12	1.79293e-13	4.73639e-48	3.85771e-157	1.1947e-24	0
A930001A20Rik	1	1	0.00111997	2.32117e-07	1	1	1
A930003A15Rik	1	1	1	3.75096e-06	1.88971e-113	1	5.99193e-63
A930003O13Rik	1	NA	1	1.71984e-09	5.41227e-26	4.63789e-09	5.45541e-56
A930004D18Rik	1	1	1	2.45796e-13	5.43059e-22	1.77961e-05	1.28698e-60
A930006I01Rik	1	1	0.276705	5.37305e-06	2.56696e-183	0.00130752	9.94915e-140
A930007I19Rik	7.33956e-50	1	1	0.290395	7.12879e-08	1	1
A930009A15Rik	1	1	1	1	2.49864e-07	6.95778e-199	3.64027e-60
A930012L18Rik	1	1	1	7.2361e-10	1.23097e-22	0.924376	4.34141e-45
A930015D03Rik	1	1	1	6.78596e-06	4.59414e-07	NA	2.14196e-28
A930016O22Rik	1	1	1	1	8.3992e-11	1	1.92867e-21
A930017K11Rik	1	1	1	1.17363e-06	2.207e-135	0.00546466	7.6676e-78
A930024E05Rik	1	1	1	8.64537e-11	5.14255e-11	0.01444	6.82941e-28
A930024N18Rik	1	1	1	1	3.0199e-05	1	8.87127e-16
A930028N01Rik	1	1	NA	1	4.48097e-76	1	1.25122e-41
A930029G22Rik	1.15432e-05	1	1	5.01127e-18	3.67668e-61	4.5461e-13	1.96122e-105
A930033H14Rik	0.000858276	1	0.000536778	4.23181e-16	1.24584e-63	3.23017e-07	2.12393e-65
A930041C12Rik	1.93795e-41	1	7.59403e-85	4.80872e-17	3.51454e-44	1.5515e-174	1.0092e-108
AA387200	1.58161e-15	1	NA	2.48577e-10	3.83526e-76	6.04735e-61	2.68843e-75
AA543186	0.0373959	1	1	1	9.85057e-21	9.81843e-17	3.86504e-38
AA986860	1	1	1	1	8.70378e-14	1	1.0024e-08
Aaas	1	1	1	4.76388e-20	4.66563e-14	3.65594e-11	5.64795e-53
Aacs	8.20905e-11	1	3.14828e-13	2.94899e-64	1.34984e-37	5.24089e-41	2.92501e-171
Aadat	7.4498330693512e-317	3.12985e-45	1.2142e-265	0	0	0	0
Aaed1	1.82776e-05	1	2.42013e-28	7.03777e-62	4.43122e-69	3.44518e-37	7.09897e-191
Aagab	7.29655e-19	1	1.37606e-09	7.17871e-77	1.25761e-86	3.70776e-38	5.64358e-236
Aak1	1.95779e-68	0.00319735	7.72758e-56	3.17817e-245	0	7.5494e-136	0
Aamdc	2.15952e-32	1	5.15725e-05	2.7648e-144	0	1.14071e-85	0
Aamp	1	1	1	2.65636e-81	3.77782e-290	7.461e-45	1.08414011412626e-315
Aanat	2.64558e-292	8.6872e-81	4.61521e-207	0	1.01421e-78	0	0
Aar2	1.95629e-17	1	8.67902e-08	1.81025e-89	3.55663e-72	2.47936e-49	1.40011e-254
Aard	9.10618e-23	1	3.85473e-18	1.36576e-85	1.17491e-286	1.08623e-44	0
Aars	5.72656e-18	0.139997	1.49478e-24	3.11599e-183	9.72563e-213	9.17073e-110	0
Aars2	0.00548914	1	3.79779e-09	2.02534e-48	5.87791e-75	1.46e-22	3.76914e-180
Aarsd1	1.30293e-08	1	1.22709e-08	7.32965e-56	4.11356e-90	1.42907e-29	1.3589e-232
Aasdh	0.0255402	1	1	3.1379e-32	6.60195e-23	1.76585e-09	1.00192e-81
Aasdhppt	2.82905e-13	1	8.2046e-13	1.7774e-129	1.71032e-82	9.2773e-75	0
Aass	1	1	1	2.23789e-57	1	1	5.71357e-14
Aatf	6.43368e-08	0.0205754	0.00896689	2.36306e-54	5.75595e-39	2.13278e-39	4.27204e-158
Aatk	7.98542e-92	1.18759e-05	4.95244e-69	4.6208e-279	0	2.45957e-136	0
AB041806	0.0201142	1	0.000505416	2.14422e-20	7.79368e-66	1.33959e-06	2.63981e-139
Abat	1.50242e-74	0.220729	4.38283e-69	1.85423e-189	0	6.73483e-106	0
Abca1	2.48544e-47	0.168498	1	4.397e-215	6.65338e-42	9.68751e-29	1.04107e-238
Abca2	2.01944e-93	0.00111623	1.02442e-85	4.65701e-279	0	1.96154e-149	0
Abca3	8.09498e-28	1	2.93732e-20	6.17706e-145	0	2.21795e-85	0
Abca4	9.24509e-277	0.00118514	NA	4.85912e-22	1.25269e-51	0	NA
Abca5	8.95043e-59	1	1.54004e-41	5.31702e-191	0	4.24518e-75	0
Abca6	1	1	1	0.000984745	6.61374e-24	2.13408e-36	1.08029e-36
Abca7	1	1	1	3.00628e-29	3.45818e-26	6.76795e-18	4.33091e-76
Abca8a	0.599565	2.69813e-67	1	2.75329e-34	0	7.75345e-12	0
Abca8b	4.91489e-06	1	3.90742e-05	9.45019e-30	3.64602e-53	8.08557e-17	4.39395e-127
Abca9	0	9.72737e-32	1	2.24269e-265	1.85435e-210	9.12771e-69	0
Abcb10	6.4942e-21	1	8.41893e-16	9.62929e-118	2.88731e-68	1.83106e-60	4.27563e-270
Abcb1a	2.04298e-18	0.0239638	0	3.07956e-308	9.11737e-258	8.61858e-99	0
Abcb1b	3.87906e-30	1	1	NA	3.32702e-22	4.13121e-08	4.78311e-29
Abcb4	0.000376943	1	1	NA	1.31812e-23	5.77973e-55	5.16716e-49
Abcb6	1.6117e-28	0.00030265	1	8.11294e-17	2.32339e-84	2.0876e-07	4.52511e-113
Abcb7	2.26692e-14	1	1.09472e-11	1.15633e-93	7.43325e-229	1.59635e-32	0
Abcb8	1.74688e-26	1	1.03641e-22	8.35338e-87	9.95384e-162	2.23929e-49	0
Abcb9	7.25242e-16	1	9.52446e-14	1.94008e-177	2.83054e-166	1.06967e-49	0
Abcc1	0.0328569	1	0.0212302	9.62836e-38	4.01966e-32	2.56008e-26	3.84633e-106
Abcc10	2.00552e-07	1	3.96324e-05	1.36546e-45	6.23304e-113	8.54187e-25	1.09064e-226
Abcc3	0	1	1.69696e-79	1.07274e-304	5.80233e-45	2.44848e-08	0
Abcc4	1	1	4.20919e-88	1	1.34839e-28	NA	1.01466e-16
Abcc5	3.63071e-39	0.0100352	9.16965e-45	2.27003e-187	2.76017e-300	7.51787e-125	0
Abcc8	4.32565e-18	1.20796e-35	0.000104765	7.12363e-16	7.82511e-91	3.89179e-08	2.91869e-138
Abcc9	1	1	3.27954e-178	0.00465045	9.07097e-30	1	1.08434e-11
Abcd1	1.50149e-10	1	1	6.75281e-31	4.9616e-20	8.49732e-14	1.41332e-85
Abcd2	6.50751e-13	1	1	2.22152e-138	5.48429e-58	1.01029e-12	3.69976e-125
Abcd3	5.07017e-25	1	2.12983e-28	1.62965e-177	1.36052e-116	2.52072e-161	0
Abcd4	2.72041e-09	1	0.017985	4.91255e-114	6.81058e-85	7.01008e-62	5.28426e-245
Abce1	1.1397e-13	1	3.12372e-06	2.91336e-114	1.27685e-145	1.45872e-60	0
Abcf1	3.04291e-13	1	1.41968e-23	1.72958e-206	2.2404e-189	1.30068e-123	0
Abcf2	1.13785e-09	1	2.3826e-17	5.00588e-141	2.76676e-147	6.5797e-80	0
Abcf3	5.27532e-20	4.15905e-05	5.04645e-19	1.63886e-142	1.52832e-155	8.66808e-88	0
Abcg1	1.24146e-26	1	4.91388e-43	6.37557e-213	2.42246e-229	1.60806e-94	0
Abcg2	1.08938e-09	1	0	1.28773e-07	2.43838e-93	2.70052e-40	2.58205e-265
Abcg4	2.45461e-39	1	2.00619e-34	2.8621e-126	0	5.52857e-75	0
Abhd10	6.24624e-19	0.114477	5.25748e-10	2.8139e-119	5.12789e-127	4.81951e-90	0
Abhd11	1.34773e-25	1	4.89117e-43	4.6454e-202	5.2019e-227	2.65519e-109	0
Abhd12	5.5600503295353e-314	1	2.84805e-95	2.38704e-136	1.70772e-95	1.08919e-66	1.13641e-169
Abhd13	0.000404494	1	0.000124095	3.56115e-74	1.98737e-99	6.41448e-31	6.94429e-224
Abhd14a	4.22501e-43	1	5.57093e-34	8.55455e-149	9.95681e-81	6.92976e-109	0
Abhd14b	1.98462e-10	1	0.000288271	5.65499e-228	1.80249e-143	1.72422e-48	4.73209e-282
Abhd15	5.00157e-70	1	1	NA	8.43819e-16	3.12424e-19	9.31284e-54
Abhd16a	2.34365e-22	1	3.00143e-08	1.01589e-160	4.43641e-101	1.66461e-105	0
Abhd17a	1.64494e-14	0.574709	7.40167e-08	2.50968e-204	0	1.27808e-98	0
Abhd17b	1.07995e-32	0.00045801	1.33898e-25	6.87686e-127	0	6.45424e-54	0
Abhd17c	2.89805e-38	1	1.74671e-05	3.63253e-78	1.78465e-54	1.75963e-87	8.812e-254
Abhd18	1.03333e-44	0.289281	1.40231e-35	5.77376e-140	0	1.34963e-80	0
Abhd2	1.51939e-07	1	4.45937e-109	5.41365e-17	1.93177e-164	0	0
Abhd3	5.74844e-14	1	2.59632e-09	0	1.90077e-70	4.67012e-28	0
Abhd4	0.000220119	1	1	1.19967e-64	0	2.28901e-16	0
Abhd5	0.000114561	1	1	1.66638e-37	0	6.73865e-21	0
Abhd6	1.74037e-20	1	5.13484e-05	3.67956e-128	6.77605e-59	7.31722e-58	7.96312e-266
Abhd8	1.67737e-62	1	3.55439e-31	6.99989e-150	0	8.20193e-79	0
Abi1	8.83991e-18	0.64928	6.63303e-14	2.56774e-199	4.61525e-278	4.70063e-100	0
Abi2	8.59765e-89	1	2.15655e-52	6.0392e-266	0	3.49889e-132	0
Abi3	0	1	0.0269774	1.72981e-110	1.79389e-220	5.59047e-37	0
Abi3bp	9.27193e-23	1	7.37654e-18	4.53646e-51	1.131e-275	2.42332e-38	0
Abl1	9.00947e-06	1	0.117441	1.34197e-57	7.35021e-235	1.93962e-26	3.14031e-270
Abl2	7.38059e-07	1	0.00222442	3.28204e-80	1.98286e-126	8.12177e-42	2.64356e-288
Ablim1	1.61918e-34	0.370035	0	7.77545e-132	0	3.85315e-89	0
Ablim2	2.66395e-62	0.00942662	7.9505e-63	1.73009e-204	0	4.4822e-106	0
Ablim3	4.43315e-24	1	2.20072e-18	2.42839e-108	9.76876e-296	2.03244e-54	0
Abr	1.1537e-48	0.0901962	9.95918e-20	1.80663e-247	0	1.49739e-108	0
Abracl	1.94624e-67	1	2.52068e-43	1.57736e-90	2.74836e-236	1.72784e-45	0
Abraxas1	1.00894e-05	1	1	1.27339e-33	5.5135e-35	9.20639e-25	7.12804e-127
Abraxas2	1.02363e-15	1	5.24554e-20	1.98842e-159	7.27599e-223	9.00301e-78	0
Abt1	3.6353e-09	1	NA	3.23344e-78	2.88567e-86	9.02456e-59	3.26917e-298
Abtb1	1.79812e-13	0.180073	1.17518e-15	1.23544e-137	3.07473e-125	2.94184e-87	0
Abtb2	1	1	1	2.1223e-24	2.08211e-64	1.14168e-73	2.63925e-151
AC061963.1	0.0303819	1	1	0.107284	6.18866e-29	1	4.2363e-58
AC078895.1	2.46458e-06	1	1.17579e-07	1.90299e-30	1.44797e-98	9.45183e-17	1.37999e-218
AC101921.1	0.0219419	1	0.00325185	5.19505e-12	6.62562e-69	3.19382e-25	2.0125e-100
AC110166.2	0.00127611	1	2.34137e-07	1	3.16257e-08	1	4.29951e-11
AC110241.2	2.1056e-67	1	3.92485e-153	3.70142e-24	0	2.98051e-239	0
AC113587.1	1	1	NA	0.0973913	1	0.00112095	0.000681362
AC114585.1	0.314673	1	0.0178445	1.38541e-07	1.20048e-40	0.011999	3.63082e-81
AC116487.2	1.78109e-05	1	0.000428144	1	5.27892e-28	1.76202e-13	1.39381e-16
AC118542.1	2.26207e-18	1	6.3772e-20	2.09983e-78	5.37833e-265	2.05408e-38	0
AC122413.1	1	1	0.612224	8.18136e-12	1.12771e-30	0.000390515	2.57223e-77
AC123724.1	1	1	1	1	0.00624062	1	3.24443e-11
AC123870.1	5.37278e-07	1	1.85481e-08	NA	2.66761e-74	1	2.05607e-111
AC124532.2	4.03329e-31	1	NA	0.000296627	6.48073e-27	0.00269254	4.69936e-46
AC124561.1	4.11504e-48	1.11451e-17	1	6.53337e-17	1.08456e-38	0.0667022	8.0615e-78
AC124739.2	1.49487e-08	1	1	1	1.80004e-12	1	5.51702e-27
AC125141.1	1	1	1	1	2.26249e-13	0.0465757	4.18153e-12
AC125141.3	2.09776e-09	1	1.30402e-20	3.75561e-94	5.77914e-08	2.92401e-25	1.31837e-34
AC125371.2	5.75434e-08	8.30133e-14	2.76963e-36	3.86191e-07	1.42971e-09	1	5.40669e-13
AC126055.1	3.59722e-94	8.89043e-48	3.84993e-186	NA	5.1133e-147	NA	NA
AC127341.3	1.27499e-10	1	1	1.56006e-08	2.07033e-36	0.010564	2.19146e-35
AC129328.1	1	1	1	NA	0.767321	1	5.06924e-11
AC130815.2	1	4.89322e-14	0.000137836	0.00166896	8.52808e-63	9.23565e-15	4.41968e-116
AC133505.1	1	1	1	0.672549	2.92833e-190	NA	4.29089e-143
AC139671.1	1.15661815110605e-316	0.248994	0	0	0	2.2166e-292	0
AC140186.1	1	1	1	1	1	1	1
AC140300.1	4.29713e-12	1	2.03214e-10	1	8.46624e-12	NA	2.74058e-17
AC144408.3	2.26628e-08	1	1.90543e-53	NA	6.73079e-23	NA	6.74068e-30
AC146911.1	1.4466e-06	1	1	1.61568e-26	5.61644e-21	5.58165e-21	5.83361e-59
AC149090.1	1.2291e-12	0.103208	1.12554e-64	6.99594e-113	0	8.24974e-43	0
AC150035.3	4.85444e-10	5.61604e-43	1	0	1.40744e-100	0	4.56951e-138
AC152827.1	1	1	1	2.364e-15	6.10041e-06	2.36726e-05	1.23561e-38
AC153140.2	1	1	1	1	0.00470879	1	1.1666e-06
AC154200.1	2.47276e-42	1	6.76369e-98	6.94716e-28	2.97767e-44	2.56902e-228	1.52453e-87
AC154509.1	2.94259e-29	1	3.29342e-42	5.5475e-264	0	NA	1.18159e-213
AC154683.1	1	1	5.45028e-12	1.92923e-50	2.51671e-15	1.19278e-46	8.11706e-42
AC154760.1	1	1	0.000136487	3.35382e-23	8.88531e-40	3.76083e-08	4.43205e-90
AC156026.1	9.5668e-05	1	1	1.113e-46	3.87643e-07	2.82674e-07	4.26712e-26
AC159282.1	1.33762e-29	1	NA	9.15107e-279	0	6.64289e-86	1.02629e-220
AC160336.1	3.63431e-21	1	2.83968e-15	1.88052e-120	0	6.34031e-57	0
AC160562.1	0	1	9.62896e-255	0	1.1435e-237	2.71217e-261	0
AC161165.3	1	1	1	0.137569	0.000337243	1	4.9355e-17
AC161165.6	1	1	1	2.07866e-14	1.16157e-22	9.60209e-09	3.68622e-71
AC161376.2	4.45012e-05	1	0.00176	9.91589e-22	0	2.24128e-09	1.24868e-256
AC162302.1	1	1	1	NA	6.58928e-07	1	4.55509e-15
AC163032.1	0.00167468	1	2.68332e-06	2.11231e-40	2.89679e-39	5.20814e-21	3.36058e-132
AC163040.1	1	1	1	1	0.000947493	1	3.66093e-10
AC163633.1	0.0344953	1	5.41449e-05	3.13629e-18	1.76657e-52	1.60361e-08	7.49816e-128
AC163720.3	1	1	NA	1	1	5.92107e-14	0.00289121
AC164424.1	0.907086	NA	1	6.7509e-12	4.59592e-34	0.000465117	6.90316e-72
AC165271.1	7.03419e-15	5.46163e-23	3.85051e-104	1	2.82044e-24	2.86171e-84	1.32979e-07
AC165953.2	1.30181e-15	1	7.01699e-13	3.73078e-92	1.28213e-197	8.88343e-46	0
AC168977.1	1	1	1	0.00123926	2.9094e-21	1	2.39521e-40
AC174678.1	1	1	1	NA	1	1	0.002697
Acaa1a	8.04123e-05	1	3.89296e-06	6.23256e-134	2.73459e-231	4.50834e-89	0
Acaa1b	1	1	1	0.000559153	5.29099e-12	1	1.87264e-28
Acaa2	0.0126765	0.000333849	5.65714e-37	1.58025e-160	2.80686e-38	2.074e-15	1.42684e-173
Acaca	3.85218e-65	1	2.32305e-45	1.55653e-171	2.66762e-230	9.14819e-98	0
Acacb	5.41305e-05	1	0.000192658	2.08223e-11	6.22861e-70	1.67048e-07	2.47475e-101
Acad10	1	1	1	2.24385e-11	2.50654e-05	0.00615894	1.0952e-25
Acad11	0.0154391	1	1	3.02752e-53	6.45688e-11	2.3002e-15	2.43551e-72
Acad12	1	1	1	4.10336e-24	NA	3.63717e-05	4.45639e-30
Acad8	2.29146e-06	1	1	1.00876e-81	4.23503e-28	3.17711e-42	7.17781e-184
Acad9	1.87864e-07	1	1.47141e-11	8.12681e-71	7.02334e-60	1.40804e-42	8.78003e-222
Acadl	1	1	2.47164e-14	9.80766e-71	1.01148e-134	8.81104e-14	7.19043e-270
Acadm	1.77667e-09	0.000104822	7.4371e-49	1.24433e-137	4.44188e-83	2.43418e-53	0
Acads	7.97247e-121	1	4.68018e-05	1.52196e-37	7.9073e-33	1.52099e-19	5.15376e-121
Acadsb	1.27392e-31	1	1.08266e-19	4.07958e-169	0	1.47671e-102	0
Acadvl	0.0661092	1	0.0001864	5.29528e-95	5.92942e-47	1.48154e-51	1.65841e-209
Acan	1	1	1	1	6.95606e-15	1.02299e-109	7.02844e-31
Acap2	7.09748e-09	1	1	5.41179e-63	0	1.68826e-38	0
Acap3	3.07855e-11	1	0.000244634	2.88304e-69	5.37641e-110	6.91854e-155	4.26628e-302
Acat1	1.36237e-21	0.296159	1.16864e-26	1.93799e-191	7.44504e-111	2.72131e-111	0
Acat2	2.03924e-42	0.00877043	2.95274e-31	8.11935e-175	1.35637e-126	6.51101e-95	0
Acat3	1	1	1	2.81407e-08	NA	1	1.19465e-05
Acbd3	6.42336e-12	2.12474e-05	9.47739e-16	5.62349e-131	2.25837e-134	1.33793e-89	0
Acbd4	1.63315e-19	1	2.54478e-14	6.78414e-103	3.73578e-237	2.04856e-53	0
Acbd5	5.929e-30	0.00876383	2.4981e-24	4.48547e-184	3.78332e-158	1.14038e-108	0
Acbd6	1.73164e-14	1	3.03877e-19	1.65849e-211	8.77545e-124	9.83724e-119	0
Acbd7	0.0502457	1	0.00687695	3.27007e-14	5.09874e-32	2.05827e-06	1.87207e-81
Accs	0.0159144	1	1	1.68023e-32	1.05687e-34	1.02003e-16	2.1924e-79
Acd	4.50791e-18	0.527821	5.93585e-14	3.30235e-158	4.73498e-180	3.06425e-96	0
Ace	4.5488e-13	1	4.79633e-11	2.81217e-54	9.35805e-183	1.52238e-24	4.06432138174386e-310
Ace2	3.01141e-13	1	0	0	NA	8.07047e-10	0
Acer2	0.0105686	1	3.0058e-53	2.29671e-24	1.70849e-20	5.82746e-14	1.42868e-102
Acer3	4.47447e-15	1	3.13901e-09	7.64074e-99	1.54271e-188	4.43841e-44	2.232e-295
Ache	5.34868e-58	0.0174609	9.56935e-76	3.60708e-298	0	3.63487e-54	0
Acin1	0.00771675	1	5.29898e-10	6.61478e-156	5.02515e-31	1.75414e-103	3.37336e-306
Ackr1	1.02925e-53	0.408284	1.53633e-45	7.79375e-188	0	1.93957e-88	0
Ackr3	0.0503918	1	0	3.03966e-19	4.16247e-56	1.06792e-36	3.6891e-127
Acly	1.38905e-21	0.0793466	4.81242e-24	1.20604e-178	2.4972e-280	9.98089e-87	0
Aco1	1	1	1	3.45698e-45	6.47399e-21	6.61157e-18	4.54996e-96
Aco2	2.06185e-33	0.167134	1.52751e-10	2.06871e-189	1.38588e-112	8.65156e-88	5.80569e-302
Acot1	8.90263e-14	1	4.45848e-06	1.14057e-05	0	5.23637e-12	0
Acot11	1	1	1	2.4638e-273	2.72254e-33	1.94041e-12	5.7473e-187
Acot13	4.87988e-08	1	6.74826e-15	3.7591e-151	2.34397e-29	9.80983e-93	1.10183e-226
Acot2	0.920673	1	1	2.86771e-22	4.43317e-102	7.89307e-26	2.93831e-205
Acot3	1	1	1	0.534885	2.90988e-14	1	1.42386e-28
Acot4	0.029549	1	2.1685e-12	0.188354	6.92099e-29	1	3.18754e-56
Acot6	0.488054	1	1	7.11208e-20	2.61003e-14	3.65752e-08	NA
Acot7	8.90681e-66	1	1.64029e-63	2.01878e-124	0	4.98169e-23	0
Acot8	1.99891e-09	1	4.32514e-12	1.71981e-94	7.48507e-70	1.64163e-55	3.50642e-266
Acot9	0.00282644	1	2.63701e-18	1.52664e-49	4.5536e-44	8.59414e-27	1.14046e-147
Acox1	8.46521e-51	0.834697	5.3033e-28	3.02305e-200	3.46251068566877e-313	8.63216e-110	0
Acox3	1.68967e-156	1	1.23691e-05	1.26255e-52	3.5474e-89	1.07635e-22	2.16656e-189
Acp1	1.85544e-87	5.48965e-05	5.85897e-65	1.70176e-19	0	4.33758e-188	6.45182430547987e-312
Acp2	1.61424e-15	1	9.39345e-24	1.66901e-166	0	1.05605e-99	0
Acp6	0.00336705	NA	0.00267616	4.91046e-38	7.64484e-42	6.85162e-23	3.96077e-108
Acp7	0	5.56757e-118	4.44332e-43	3.26677e-209	3.24367e-88	0	0
Acr	1	1.60378e-08	1.89948e-26	0.0194803	2.62854e-18	3.28952e-05	1.00964e-25
Acrbp	1.3112e-07	1	6.6798e-06	1.4639e-40	2.40231e-126	4.66092e-23	9.94805e-228
Acsbg1	1.04611e-24	1	3.98408e-10	0	2.44411e-177	1.66936e-22	0
Acsf2	1	0.000372277	1	9.65715e-119	1.13111e-52	0.000595356	1.41575e-95
Acsf3	1.0448e-08	1	0.0007024	1.38241e-37	1.04975e-67	1.87371e-25	1.31133e-157
Acsl1	5.92087e-11	1	7.54148e-16	7.46461e-190	2.84238e-81	6.79705e-76	4.45713e-274
Acsl3	4.05382e-68	1	2.65036e-58	0	0	2.55238e-63	0
Acsl4	2.41991e-27	0.361984	5.99349e-41	9.1462e-194	0	5.27223e-100	0
Acsl5	4.38819e-18	1	3.24168e-09	4.19838e-79	1.05084e-267	1.62662e-54	0
Acsl6	2.2822e-45	1	1.00963e-35	0	0	1.15322e-56	0
Acsm5	1.39275e-17	6.10311e-11	NA	2.2068e-17	1	7.50945e-21	0.00346705
Acss1	0.000193014	1	1	8.69931e-177	3.51983e-18	1.12493e-26	3.14391e-173
Acss2	2.7943e-19	1	7.29149e-07	6.9991e-153	5.98802e-35	6.88531e-40	6.08931e-195
Acss3	1	1	1	6.35672e-101	0.000315898	1	9.64318e-48
Acta1	1.46011e-13	1	9.133e-13	1.2484e-72	1.66126e-177	1.18829e-30	0
Acta2	1	0.130415	0	3.58467e-42	3.66973e-147	2.21609e-10	0
Actb	2.69783e-105	1	2.60687e-71	5.50941e-138	0	8.24907e-10	0
Actg1	2.25615e-142	1	4.51811e-231	1.0127e-36	6.41196e-190	9.94451e-280	2.23487e-164
Actl6a	7.88183e-07	1	2.3114e-05	4.8952e-105	3.70314e-58	4.08005e-64	8.90391e-256
Actl6b	3.08827e-64	0.0374083	8.06869e-67	3.484e-228	0	1.92975e-110	0
Actn1	1.65537e-14	1	0	3.40271e-135	0	8.57299e-58	0
Actn2	1	1	1	0.000112444	3.30961e-19	1	2.56484e-34
Actn3	0	2.6985e-38	1	5.44117e-11	1.0331e-38	1.12608e-24	1.27e-92
Actn4	8.02554e-16	1	0	1.65758e-93	3.79785e-102	1.44956e-50	0
Actr10	2.09292e-48	1	3.66709e-31	7.79276e-214	1.1758e-292	1.08528e-117	0
Actr1a	5.02137e-36	0.181389	3.43327e-30	1.55187e-220	2.16165e-207	3.43631e-114	0
Actr1b	2.21507e-56	0.00590446	1.21691e-30	1.84676e-246	0	5.62682e-117	0
Actr2	1	1	3.60641e-07	1.08717e-225	0	5.29092e-92	0
Actr3	2.03757e-30	1	8.62664e-32	2.76566e-266	1.00788e-163	5.00182e-120	0
Actr3b	4.97712e-34	1	8.06296e-26	2.1689e-125	0	2.27717e-70	0
Actr5	0.013451	1	1	6.20949e-37	8.29698e-44	1.65982e-23	6.01756e-147
Actr6	2.1594e-17	1	1.16923e-16	1.43484e-102	1.22796e-98	4.09449e-56	0
Actr8	1.65693e-10	0.00610308	1.57819e-14	1.04849e-149	8.49898e-139	6.91795e-88	0
Actrt3	1	1	0.224989	2.02483e-09	1.97213e-32	1	5.23386e-69
Acvr1	0.0312716	1	1.05483e-08	2.54761e-59	3.27078e-93	3.28211e-30	3.54853e-201
Acvr1b	5.82052e-24	1	2.44599e-27	5.74243e-122	0	2.04861e-57	0
Acvr1c	0.0183576	1	0.00314417	1.24172e-54	9.96566e-78	3.30589e-10	1.88321e-56
Acvr2a	8.87676e-15	1	8.08419e-05	8.49971e-56	3.36583e-172	1.30295e-27	0
Acvr2b	1.10114e-25	1	8.18267e-22	7.68174e-150	5.05556e-218	3.01788e-76	0
Acvrl1	6.49272e-42	1	0	1.19331e-90	2.55903870404832e-317	2.684e-23	0
Acy1	1	1	0.0808379	3.38885e-43	1.89576e-159	2.38559e-14	1.42232e-201
Acy3	1.23724e-06	1	0.0397144	7.03579e-15	1.06906e-302	2.03974e-08	5.29357e-241
Acyp1	2.5675e-20	1	2.01032e-22	3.09581e-166	7.95027e-101	8.27819e-93	0
Acyp2	8.05362e-62	1	2.11884e-30	1.05303e-173	5.24441e-89	2.54505e-122	0
Ada	1	1	1	1	2.7242e-50	1	7.54207e-35
Adal	4.26702e-08	1	6.10276e-12	3.39982e-50	3.1897e-83	2.95724e-29	4.87085e-221
Adam10	4.65704e-11	1	6.8771e-11	3.9625e-154	2.72045e-81	7.6593e-98	0
Adam11	5.69829e-35	1	7.55066e-36	1.06649e-114	0	1.30842e-61	0
Adam12	1	1	1	0.414832	3.86197e-07	3.97117e-46	8.99078e-25
Adam15	5.13452e-32	1	3.41283e-62	7.05751e-152	1.14142e-226	4.99948e-85	0
Adam17	1.59935e-19	1	9.10201e-05	9.0237e-37	6.53403e-21	1.19743e-21	7.19053e-106
Adam19	1.64417e-07	1	1.83874e-05	2.79592e-52	1.22006e-110	1.28835e-17	1.78604e-82
Adam1a	1	1	1	0.399604	0.74848	1	2.1284e-12
Adam21	1	1	0.000356403	1	2.65033e-08	1	8.34064e-14
Adam22	2.74574e-102	0.00226799	1.68586e-83	1.01014685686118e-318	0	5.99268e-118	0
Adam23	1.22612e-43	7.36721e-32	1.00088e-49	4.76521e-213	0	1.74916e-41	0
Adam28	1.37686e-137	1.08631e-69	NA	NA	1.14531e-72	0	2.52979e-30
Adam32	1	1	0.000165844	0.486636	1	NA	0.0850075
Adam33	2.10419e-14	8.89217e-05	1	3.92724e-06	1.76485e-55	3.53497e-07	3.82694e-68
Adam4	0.589847	1	1	1	0.82317	4.83496e-05	0.000483192
Adam8	1	1	1	1.51194e-10	1.97762e-41	0.000143776	7.5416e-76
Adam9	0.00475319	1	0.139265	1.26118e-67	3.04632e-55	1.76474e-174	3.41298e-208
Adamts1	2.07715e-172	1	0	9.02118e-18	4.77478e-58	3.29296e-27	4.125136719364e-314
Adamts10	2.49499e-07	0.139324	4.70561e-16	5.11164e-52	2.3954e-160	4.58608e-25	5.81784e-239
Adamts12	2.24439e-13	4.79092e-16	1	0.1293	4.31242e-40	1.07663e-28	1
Adamts15	0.0548548	1	1.85173e-21	2.49539e-14	1.7253e-52	1.66264e-07	6.23506e-99
Adamts16	1	1	1	0.000349631	1.37158e-22	1	2.72291e-39
Adamts17	1	1	1	3.52634e-06	4.69022e-28	2.07522e-05	6.33974e-49
Adamts18	0.00103284	1	0.0112174	7.01269e-21	1.26936e-81	2.10304e-09	6.44908e-159
Adamts19	1	1	1	0.382679	8.82088e-12	1	2.18324e-25
Adamts2	3.71093e-36	1	1.74593e-28	2.73067e-118	1.51688e-286	1.12587e-60	0
Adamts20	1	1	1	1.21906e-52	2.21258e-20	1.56e-05	2.03876e-57
Adamts3	1	1	1	0.00640295	3.77582e-05	0.871379	5.05702e-07
Adamts4	8.60353e-09	1	0.11874	5.72929e-43	0	6.90033e-25	0
Adamts5	0.00060604	1	1.99075e-08	7.2689e-19	5.0144e-92	3.06146e-14	3.42556e-142
Adamts8	5.41564e-41	3.14035e-31	2.11439e-16	0.00413679	1.23247e-34	0.000159535	2.74522e-06
Adamts9	1	1	1	1.62174e-61	8.33462e-13	0.000163012	1.38363e-43
Adamtsl1	2.3855e-15	1	5.95065e-09	1.77862e-63	1.35248e-133	2.1219e-27	6.19424e-64
Adamtsl2	0.344203	1	1	1.17524e-22	8.13336e-51	5.43314e-10	1.48826e-61
Adamtsl3	2.14606e-18	0.337089	3.3003e-17	1	0.0243323	7.8158e-05	NA
Adamtsl4	1.8715e-06	1	1	2.117e-37	0	1.2263e-16	0
Adamtsl5	1	1	3.76929e-60	1	1.62463e-11	1	5.17846e-17
Adap1	8.28123e-60	1	3.539e-73	1.58371e-285	0	2.08117e-152	0
Adap2	0	0.0065872	0	4.59594e-58	4.56587e-247	9.3798e-38	0
Adap2os	0	0.182357	0	5.11449e-74	4.00427e-247	3.31874e-31	0
Adar	9.60965e-62	0.058118	2.0345e-50	3.94602e-254	0	4.47309e-133	0
Adarb1	3.99149e-42	0.0233947	1.63462e-27	1.17861e-168	0	7.90503e-88	0
Adarb2	2.39822e-24	1	5.81926e-19	4.72892e-69	7.42311e-265	3.92652e-41	2.95122e-308
Adat1	9.35879e-05	1	3.38177e-08	5.09696e-51	3.54309e-86	2.88879e-20	7.36156e-198
Adat2	1	1	1	0.00163384	6.32476e-12	1	3.71249e-19
Adck1	0.000107516	1	0.000113561	6.00695e-80	1.82476e-80	1.12343e-43	1.3407e-221
Adck2	2.1842e-09	1	0.00799193	1.11022e-79	1.79089e-95	1.05312e-66	8.76676e-269
Adck5	5.5274e-05	1	4.06725e-10	4.31994e-62	4.01808e-190	4.22113e-41	0
Adcy1	1.33676e-32	1	1.77187e-22	8.35775e-98	0	1.22219e-40	0
Adcy10	0.0216002	1	1	6.67832e-09	0.0173862	6.71299e-17	5.56278e-24
Adcy2	4.38877e-69	1	3.60817e-62	1.00004e-151	0	9.05566e-99	0
Adcy3	8.26041e-32	1	3.96659e-27	3.88823e-130	0	8.84219e-77	0
Adcy4	3.64423e-19	1	0	1.75969e-57	1.95702e-298	7.83824e-155	0
Adcy5	2.14756e-44	1	4.72377e-68	2.8717e-180	1.6434e-105	2.13629e-85	0
Adcy6	3.87898e-09	1	8.00389e-66	2.09578e-51	4.53252e-149	2.42413e-28	1.31838e-264
Adcy7	2.7053e-07	1	7.83091e-23	5.61791e-92	1.18896e-277	2.70501e-38	0
Adcy8	1.16144e-17	1	3.10448e-12	NA	4.26527e-275	3.79744e-20	0
Adcy9	4.7322e-07	1	3.43275e-67	2.51534e-53	1.44212e-150	8.74787e-32	9.50019e-302
Adcyap1	1.1398e-78	0.276178	3.30381e-88	3.60145e-274	0	6.65199e-134	0
Adcyap1r1	2.02283e-62	0.0620883	2.52953e-49	0	0	1.48513e-96	0
Add1	2.46912e-38	1	1.6493e-22	4.03971e-190	1.00992e-149	2.06751e-102	0
Add2	6.4162e-75	2.76353e-07	8.67638e-91	4.22744e-289	0	4.17188e-131	0
Add3	2.3589e-08	0.110052	1	1.46729e-135	5.73791e-217	3.10198e-49	0
Adgra1	8.89204e-89	0.0210549	2.78329e-86	5.10285e-255	0	4.52497e-91	0
Adgra2	1	0.00449832	5.48167e-158	8.39081e-05	1.97099e-19	1	2.03223e-25
Adgra3	0.0874269	1	1	2.13708e-50	2.12029e-70	6.59032e-26	2.20307e-118
Adgrb1	2.94728e-91	0.22278	6.46497e-82	1.46795e-236	0	3.08093e-91	0
Adgrb2	5.45077e-73	1	5.14037e-59	1.41397e-156	0	3.85666e-95	0
Adgrb3	9.57524e-92	0.000155183	1.14823e-86	3.80328e-145	0	1.17765e-92	0
Adgrd1	1.55412e-176	1.25077e-73	1.92622e-189	7.91166e-29	6.89835e-35	0	6.94985e-228
Adgre1	0	1	3.59799e-05	1.18935e-09	8.56962e-69	2.09104e-07	0
Adgre5	1	3.63437e-08	5.57859e-132	1.07782e-07	2.69918e-14	0.00888647	3.24521e-40
Adgrf4	1	3.667e-29	6.32607e-60	1	6.90119e-11	9.38347e-72	1
Adgrf5	1.56997e-17	2.09307e-09	0	0	4.79379e-246	1.51883e-24	0
Adgrg1	5.58005e-88	1	0.10177	0	0	3.35616e-50	0
Adgrg2	5.06241e-08	1	9.69869e-07	1.29253e-33	3.16429e-74	2.54623e-16	7.454e-178
Adgrg3	0	1.73051e-49	1.28995e-09	NA	3.93211e-25	NA	NA
Adgrg6	3.94827e-06	1	1	0.300636	5.78253e-82	1.25938e-10	1.83812e-42
Adgrl1	5.42308e-120	0.000459176	7.0091e-47	2.63944e-155	0	9.52627e-95	0
Adgrl2	4.31421e-30	1	1.80513e-07	2.50014e-161	0	1.12571e-74	0
Adgrl3	1.23816e-106	5.41622e-07	1.98801e-88	1.81061e-100	0	4.45217e-66	0
Adgrl4	1.5623e-18	1	0	0	2.96114e-251	5.20406e-27	0
Adgrv1	1.18712e-06	1	0.000135599	5.84113e-32	0	1.75877e-12	1.6347e-272
Adh5	1	0.131223	1	1.70675e-58	7.92727e-207	3.7055e-31	4.20291e-290
Adhfe1	1	1	1	1.05955e-150	2.27003e-05	1	8.8057e-72
Adi1	1.83194e-09	1	5.84192e-15	3.26078e-79	0	7.30699e-42	0
Adipor1	2.0339e-11	1	2.28471e-28	2.38924e-219	0	2.40723e-100	0
Adipor2	8.22447e-30	0.221463	1	1.91827e-140	0	6.68449e-74	0
Adk	5.69832e-26	1	0.0539222	0	1.05097e-121	5.28432e-47	0
Adnp	0.881777	1	0.00765123	2.19373e-10	5.76305e-33	5.79565e-10	1.03493e-92
Adnp2	1	1	0.00704282	2.01277e-45	8.53774e-68	2.20301e-25	7.11699e-160
Ado	2.12213e-32	0.0849496	1.77913e-24	1.05948e-204	0	2.76565e-45	0
Adora1	2.02978e-42	0.359695	4.16571e-41	5.76754e-106	8.72554e-116	1.86859e-101	0
Adora2a	1	6.88517e-17	4.96659e-132	0.0233888	2.37053e-13	1	1.60989e-20
Adora2b	0.475037	0.227086	1	0	2.28305e-53	1.39196e-42	1.3239e-180
Adora3	0	1	0.00454571	0	1.73492e-203	1.16926e-133	0
Adpgk	4.95754e-05	1	1.16338e-08	8.26394e-69	1.79607e-96	9.12046e-39	3.68063e-233
Adprh	1.93605e-09	0.150183	5.42023e-23	6.98973e-169	5.95388e-218	7.4976e-121	0
Adprhl2	5.19308e-10	1	1.36656e-08	5.09411e-120	5.24871e-78	3.36058e-81	0
Adprm	4.96028e-08	1	8.57738e-09	3.19639e-81	2.60726e-98	2.06621e-57	2.5674e-297
Adra1a	0.00379586	1	1	NA	5.27553e-71	1.7428e-25	7.99074e-106
Adra1b	1.99659e-19	1	8.32531e-12	3.30111e-25	3.59461e-147	8.02249e-08	4.44559e-206
Adra2a	1.68295e-15	1	8.36233e-09	7.59069e-86	1.81638e-174	6.38374e-30	2.1413e-201
Adra2c	8.65457e-07	1	0.00254799	2.50917e-47	5.39881e-120	3.58983e-26	7.75638e-228
Adrb1	7.2146e-61	1	1.30154e-05	1.62171e-22	4.30753e-103	1.0965e-07	1.21499e-116
Adrb2	0	1	3.06593e-20	7.60662e-30	4.38817e-170	1.56965e-19	0
Adrb3	1	1	0.023114	5.24345e-10	1.14206e-36	1.20461e-05	5.87838e-72
Adrm1	1.17427e-11	1	2.98601e-16	1.43025e-177	3.52154e-104	2.37776e-92	0
Adsl	6.338e-06	0.948108	3.17096e-06	6.20031e-84	1.82984e-84	5.89029e-45	3.48109e-241
Adss	2.16834e-36	1	1.68547e-28	2.00174e-211	0	6.73634e-117	0
Adssl1	5.91504e-30	1	8.08651e-34	1.89221e-196	0	2.70014e-107	0
Aebp1	0.00374835	1	1	2.32469e-13	9.2245e-173	1.46364e-24	2.16699e-198
Aebp2	2.95188e-19	1	2.64217e-13	2.0163e-143	2.48448e-164	1.38438e-72	0
Aen	8.56036e-11	1	1.43573e-06	2.31166e-114	8.0572e-116	8.53685e-55	0
Aes	1.52271e-85	0.822287	5.85223e-15	9.36965e-98	1.37266e-49	1.42364e-53	4.67781e-58
AF529169	2.67348e-13	1	1.46466e-12	1.01983e-68	1.92447e-215	2.29742e-35	0
Afap1	1.43261e-10	1.13253e-06	1.107e-51	1.71621e-47	3.10313e-26	1.75556e-34	2.93765e-171
Afap1l1	0.135415	1	1.27175e-110	1.53509e-19	3.33716e-102	3.35808e-09	7.15888e-175
Afap1l2	0.00857939	1	3.75649e-61	2.80029e-06	2.36008e-43	7.82426e-136	6.66174e-136
Afdn	7.18109e-84	0.0202244	8.216e-25	6.57543e-231	2.74456e-279	2.77303e-125	0
Aff1	8.14967e-10	1	1.92155e-17	8.6075e-28	3.18288e-12	0.000390738	2.77642e-67
Aff2	7.53802e-10	1	5.13071e-05	6.81149e-42	5.69455e-115	7.56877e-24	3.05937e-244
Aff3	5.2313e-19	1	2.64909e-20	1.41922e-88	2.73881e-149	5.66263e-46	0
Aff4	2.92427e-54	0.0739804	3.50066e-32	8.82384e-228	0	3.3452e-121	0
Afg1l	3.52596e-06	1	0.0375222	2.34256e-55	1.207e-81	1.34257e-26	5.03676e-207
Afg3l1	4.14088e-22	1	3.2224e-14	1.88641e-142	2.66395e-88	8.83104e-90	0
Afg3l2	6.83116e-23	1	5.43521e-22	3.26765e-151	0	5.5984e-73	0
Afp	8.62228e-199	1	3.44729e-119	7.03027e-303	4.14826e-85	2.25776e-173	NA
Aga	3.34509e-13	1	1	3.43549e-53	1.55228e-51	1.73453e-10	5.00062e-148
Agap1	1.01943e-83	0.011915	3.16438e-37	1.08614e-278	1.79923e-163	6.76665e-124	0
Agap2	0.00767046	1	0.0364406	1.81995e-20	1.58359e-62	2.72948e-16	3.26942e-131
Agap3	1.27634e-58	1.97098e-05	3.14464e-48	8.56257e-267	0	7.33284e-134	0
Agbl2	8.35871e-06	1	8.2628e-36	NA	5.12715e-39	0.078915	1.38484e-69
Agbl3	0.00216328	1	0.000264161	1.84958e-55	1.40702e-17	1.32279e-20	6.61148e-139
Agbl4	0.0014903	1	0.000298344	1.26759e-29	4.42199e-81	1.82392e-15	7.80014e-167
Agbl5	0.00160113	1	1	1.92682e-21	1.06874e-56	2.10408e-16	1.95002e-117
Ager	7.45123e-10	0.000380917	1.7089e-08	NA	1.29523e-09	2.23932e-19	NA
Agfg1	4.64557e-27	1	4.28143e-27	2.05727e-169	1.46023e-180	3.42597e-127	0
Agfg2	2.25983e-20	0.00283892	3.78785e-31	5.40807e-158	3.72911e-212	3.08699e-72	0
Aggf1	5.92479e-09	1	1.28356e-10	9.00581e-132	3.29298e-126	4.78021e-88	0
Agk	2.57867e-30	0.393457	7.28221e-26	3.20186e-138	3.72711e-307	9.47871e-81	0
Agl	7.45697e-20	1	1.82478e-08	5.78042e-90	2.41912e-204	4.41166e-28	3.8637e-264
Agmat	1	1	0.000407635	3.76438e-05	5.05992e-31	0.0212387	5.73027e-67
Agmo	3.84891e-59	1	1	1.05568e-13	1.42951e-88	0.105403	6.17634e-201
Ago1	4.93911e-14	1	3.9676e-10	5.34685e-111	9.84658e-99	7.08865e-53	2.63227435117076e-316
Ago2	1.28391e-31	1	4.38609e-24	6.93853e-191	0	9.72131e-113	0
Ago3	5.92404e-24	1	4.66741e-21	1.07643e-147	1.76452e-73	7.29977e-80	0
Ago4	0.000436835	1	2.47126e-07	6.13301e-52	1.08429e-128	3.123e-51	1.09788e-263
Agpat1	6.4902e-24	0.0727777	2.84919e-22	2.1932e-121	1.17822e-212	4.45826e-68	0
Agpat2	3.20554e-49	1	2.49142e-09	3.97356e-15	5.03458e-52	0.0724312	1.95576e-33
Agpat3	1.56179e-24	1	3.94786e-18	2.44668e-194	3.44987e-106	1.01976e-113	0
Agpat4	6.40759e-101	1	1.45185e-85	0	0	1.49623e-24	0
Agpat5	1.4742e-32	0.0429085	1.75649e-21	0	3.3933e-171	1.21441e-184	0
Agps	0.00038544	1	1.82921e-08	4.20549e-74	1.2221e-47	8.71655e-42	8.27505e-157
Agrn	1.05111e-31	1	9.19485e-40	2.17285e-98	0	5.18973e-82	0
Agrp	1	1	1	1	2.25407e-13	1	1.99533e-24
Agt	4.53595e-09	1	2.1291e-16	0	2.87234e-175	2.5494e-73	0
Agtpbp1	2.16023e-52	0.0137206	3.10197e-38	1.05474e-219	5.35733e-269	3.54631e-104	0
Agtr1a	1	1	1	0.00615929	2.84954e-16	1	1.56072e-25
Agtr2	1	1	1	4.91612e-07	9.12425e-37	0.00213542	4.84197e-75
Agtrap	1	0.00272328	1.36541e-12	1.61327e-68	8.17185e-88	5.92506e-14	5.03514e-151
Ahctf1	3.69694e-18	1	3.01662e-08	1.39118e-89	7.62704e-118	3.49632e-61	8.92212211322636e-316
Ahcy	0.0081426	1	0.787766	7.61213e-26	4.99683e-29	1.30914e-18	7.80335e-84
Ahcyl1	6.69066e-47	1	8.88473e-12	0	2.66331e-217	3.73163e-99	0
Ahcyl2	1.53435e-44	1.32129e-06	2.24397e-39	2.23107e-231	0	4.79588e-113	0
Ahdc1	2.28793e-22	0.0738569	1.4266e-25	5.93379e-163	0	2.29657e-81	0
Ahi1	3.91422e-199	2.72737e-10	3.12101e-194	0	0	1.92593e-162	0
Ahnak	1	2.36715e-11	0	1.74574e-07	3.60413e-65	4.01732e-09	1.9051e-190
Ahnak2	2.9941e-09	1	3.57359e-07	4.62433e-33	1.11929e-77	4.15869e-10	2.04847e-136
Ahr	6.16294e-05	1	1	1.78043e-32	1.42279e-109	3.03215e-16	2.28039e-177
Ahsa1	0.864449	0.0999217	1.62674e-09	2.08629e-160	3.08708e-177	1.64793e-84	0
Ahsa2	5.94363e-10	1	4.08229e-09	2.20251e-135	5.43434e-105	2.75519e-75	0
AI115009	0	3.14113e-50	2.7815e-09	3.07988e-141	1.36156e-64	2.89999e-51	0
AI197445	0.177172	1	1	6.64428e-07	2.29286e-31	0.156793	2.19831e-42
AI314180	2.39249e-32	1	1.79054e-28	1.14131e-151	0	1.05152e-87	0
AI413582	5.48958e-27	0.00100633	2.47046e-86	3.15687e-91	0.565463	3.05846e-100	4.09524e-111
AI429214	1.48536e-08	0.00936501	1	0.738738	2.67876e-30	3.49543e-08	2.29931e-81
AI464131	0.244496	1	0.000581072	0	1.14308e-35	0.42202	2.34553e-227
AI467606	6.73067e-13	1	1.01513e-35	2.29889e-25	4.32642e-93	1.42254e-13	3.18543e-75
AI480526	2.3317e-16	1	4.98394e-10	5.09338e-110	8.70313e-165	1.64345e-45	0
AI504432	1.14633e-71	0.02864	2.6135e-72	9.80893e-274	0	1.63816e-121	0
AI593442	2.55869e-98	0.00136602	7.3724e-96	3.81271e-287	0	1.21333e-129	0
AI597479	2.9853e-16	1	1.59369e-14	6.70471e-90	1.48312e-110	1.30257e-53	0
AI606181	1	1	1	3.40652e-15	1.86187e-15	3.5715e-10	2.14573e-59
AI837181	3.13824e-16	1	4.02802e-09	7.81111e-176	1.34235e-189	1.2359e-93	0
AI839979	1	1	1	1	2.04629e-09	1	1.63381e-17
AI847159	1.06854e-17	1	6.69065e-42	3.22002e-178	2.61145e-41	NA	7.86353e-65
AI849053	1	1	1	4.91957e-113	4.89853e-07	3.27264e-06	1.70189e-61
AI854703	2.03111e-23	1	4.45337e-21	3.93037e-105	6.39534e-274	2.11399e-64	0
AI987944	0.00323283	1	9.03904e-06	1.45973e-43	2.7367e-31	2.8996e-35	4.07084e-126
Aida	2.52786e-43	0.0135885	3.05057e-26	1.78556e-215	0	2.62724e-114	0
Aif1	0	0.815496	3.64083e-20	1.99126e-74	1.9307e-267	4.50364e-35	0
Aif1l	1.23534e-08	1	1.60044e-11	1.42802e-21	0	1.99329e-14	0
Aifm1	9.81331e-16	1	0.00114041	5.38976e-77	1.99518e-119	6.35371e-54	1.87021e-269
Aifm2	2.095e-05	1	1	9.37279e-37	1.04538e-39	2.26964e-12	1.88013e-115
Aifm3	3.06276e-14	1	1.02901e-09	0	2.20533e-163	2.85273e-41	2.46704799695016e-314
Aig1	2.16032e-59	1.01774e-06	1.79476e-56	3.12813e-178	0	1.43544e-82	1.75596e-298
Aim2	8.74857e-122	1	1	2.06249e-14	5.7528e-27	0.000469361	2.04837e-116
Aimp1	2.34815e-07	1	1.51994e-11	2.44964e-178	7.56829e-19	1.65233e-93	9.43752e-253
Aimp2	1.74084e-08	1	2.69934e-08	7.37365e-86	3.56825e-49	4.44067e-53	7.44519e-221
Aip	5.72621e-12	1	5.56718e-21	6.56429e-186	3.81187e-52	6.07535e-102	0
Airn	0.00960076	1	1.98607e-19	6.28975e-14	4.33865e-44	1.6754e-07	2.27137e-78
Ajap1	2.94348e-59	0.855286	5.86117e-20	1.6985e-214	0	2.5269e-80	0
Ajuba	7.4545e-06	1	2.34721e-215	1	5.40007e-26	8.79515e-45	3.20457e-183
Ak1	2.35535e-13	9.7462e-05	4.85065e-44	6.14169e-199	2.62198e-260	1.12731e-118	0
AK157302	0.00517833	1	1	7.25528e-11	7.28154e-33	8.16296e-05	1.22219e-82
Ak2	3.14875e-05	1	1.09697e-07	4.89729e-135	3.24892e-63	4.97144e-62	1.16196e-305
Ak3	7.62667e-21	1	0.0438586	1.01276e-51	0	3.15542e-38	0
Ak4	6.67415e-19	1	8.59525e-08	4.23554e-111	1.31386e-213	1.24823e-36	0
Ak5	3.99997e-22	1	1.85221e-21	2.43595e-102	8.91969e-207	1.05238e-50	0
Ak6	3.64403e-13	0.311224	1.73908e-12	2.22479e-147	7.55552e-153	1.59918e-84	0
Ak7	1	1	NA	1	1	1	0.00602527
Ak8	1	1	1	1.13707e-06	2.56546e-06	0.000139648	7.58868e-18
Akain1	0.0173559	1	0.000735503	3.90532e-25	1.084e-68	6.48247e-14	3.86023e-161
Akap1	7.26712e-09	1	1.02661e-10	1.87381e-50	2.99945e-70	7.66822e-39	3.81515e-200
Akap10	0.00135736	1	1.61724e-12	2.59116e-36	9.89203e-48	2.30723e-35	1.42645e-154
Akap11	2.76701e-86	0.125534	4.07322e-49	2.63994e-217	0	6.76463e-138	0
Akap12	5.55545e-19	8.27628e-23	2.74405e-93	4.36592e-87	6.88435e-271	1.38076e-33	5.52895e-297
Akap13	9.94749e-209	0.0500652	9.3233e-69	4.33893e-24	2.98709e-185	1.32525e-26	8.68336e-215
Akap17b	2.11692e-26	1	1.59556e-13	2.60508e-104	1.22037e-226	6.73589e-58	0
Akap2	0.204057	1	1.00933e-233	0.00040184	1	1.4313e-09	1.40454e-105
Akap5	0.00136326	1	2.53864e-09	2.09086e-31	1.56394e-108	7.013e-29	8.75899e-241
Akap6	6.49106e-72	0.0674925	1.00339e-54	1.60945e-237	0	1.02689e-130	0
Akap7	1.9916e-36	8.48652e-15	6.61244e-12	5.78741e-126	6.14581e-186	2.21909e-76	0
Akap8	3.9665e-15	1	4.64179e-19	5.99771e-128	3.97027e-182	2.12648e-66	0
Akap8l	2.4284e-21	1	1.89341e-24	3.47139e-186	0	1.10132e-115	0
Akap9	6.15303e-40	1	2.6386e-08	2.6827e-91	6.07148e-131	8.00667e-63	4.39974e-269
Akip1	0.000198572	1	2.78106e-27	2.07919e-10	1	3.06936e-09	1.22706e-47
Akirin1	5.25224e-11	1	4.38925e-21	3.57505e-193	2.11022e-142	5.14424e-113	0
Akirin2	1.05281e-20	0.0616665	8.25431e-16	1.75807e-184	2.36498e-87	4.52675e-111	0
Akna	0	0.0667334	8.21244e-32	0.00610478	1.36227e-83	7.10975e-28	0
Akr1a1	1	1	1	1.11659e-45	6.10208e-49	9.40591e-15	5.58893e-123
Akr1b10	5.27326e-38	1	2.92445e-06	1.78963e-266	8.22982e-241	1.70705e-31	0
Akr1b3	1.28729e-46	1	1.27491e-11	6.63975e-142	2.54433e-114	2.56397e-70	0
Akr1b7	6.51248e-35	1	3.59736e-82	8.97156e-12	1.11026e-35	1.22254e-09	7.74237e-103
Akr1b8	3.94184e-06	1	6.04972e-16	1.76703e-13	8.26631e-43	1.69306e-29	NA
Akr1c14	3.39029e-24	1	0	4.41984e-220	2.25071e-84	5.66198e-06	0
Akr1cl	2.78838e-22	1.73524e-34	1.43932e-76	2.2556e-37	4.49318e-14	8.33773e-79	7.7163e-38
Akr1e1	0.000706426	1	0.0623328	2.40693e-66	4.14865e-35	1.86648e-47	2.00098e-177
Akr7a5	4.44379e-07	0.736446	2.23932e-15	1.78998e-129	1.2384e-301	5.80248e-77	0
Akt1	7.25366e-19	1	8.56582e-30	7.75242e-189	3.74601e-308	6.41524e-102	0
Akt1s1	4.5729e-15	0.0085526	2.28534e-16	1.13864e-177	3.01203e-208	2.96668e-100	0
Akt2	0.116159	1	4.35236e-06	1.30987e-66	7.87572e-37	9.2763e-48	4.91934e-191
Akt3	3.21454e-17	1	3.71936e-32	2.1067e-92	3.18825e-177	4.21214e-49	0
Aktip	9.8553e-60	1	5.32229e-26	8.84936e-229	1.86835e-06	3.66943e-102	6.76409317515711e-311
AL589670.1	1	1	1	1.47001e-24	3.66381e-08	9.49223e-06	5.51593e-18
AL589692.1	1	1	1	1.68615e-09	0.00728186	0.0019185	7.82081e-17
AL590144.2	8.53176e-90	1	0.00160491	1	6.25829e-29	0.00618474	7.60397e-35
AL591952.3	0.0834159	1	1	2.20242e-11	1.72562e-11	0.00363767	2.14481e-38
AL603867.1	2.69633e-18	1	9.27916e-36	4.19823e-250	7.84438e-69	0.592762	9.845e-121
AL732309.1	4.49142e-06	1	1	6.45371e-46	NA	5.45889e-17	0.014111
AL732506.1	1	1	1	0.000225289	1.78034e-14	0.143343	2.87536e-40
Alad	1.68308e-15	1	8.05877e-06	2.21932e-98	1.51041e-69	4.36659e-88	4.99971e-256
Alas1	6.21452e-07	1	2.86486e-81	1.95775e-71	4.68735e-72	5.6371e-33	1.58473e-231
Alcam	3.8333e-118	0.000236137	7.70787e-112	1.92658e-169	0	6.11755e-60	0
Aldh16a1	1.35898e-06	1	1	9.3784e-15	3.63541e-11	1.09736e-05	5.59548e-37
Aldh18a1	0.0122763	1	0.00138266	9.26467e-29	1.23669e-93	1.27532e-42	1.49186e-170
Aldh1a1	0.242974	1.27523e-32	1	7.5058e-304	9.89762e-62	4.24791e-07	7.14898e-180
Aldh1a2	1	3.75599e-21	1	0.000203349	6.75282e-43	0.000218313	4.21163e-36
Aldh1a3	0.0727382	1	1	NA	6.07341e-13	0.00237418	3.64242e-29
Aldh1b1	3.45637e-15	0.0109723	7.12566e-05	6.79888e-14	2.25519e-67	0.000103188	2.17103e-110
Aldh1l1	0.0537407	1	1	0	1.08435e-43	4.86489e-08	1.68485e-148
Aldh1l2	1	1	1	1.8974e-11	NA	1.2305e-15	3.93985e-26
Aldh2	0.0227858	5.81556e-19	1.24533e-225	6.22559e-187	2.50948e-123	4.72235e-39	0
Aldh3a2	0.000161341	1	1	2.01074e-67	6.28196e-48	3.82421e-42	5.46383e-159
Aldh3b1	5.12505e-14	1	1	0.000426347	1.05513e-156	1	6.23698e-162
Aldh3b2	1.03461e-16	1	2.30186e-15	1.07525e-43	7.32808e-65	2.33225e-32	5.68806e-215
Aldh4a1	0.0153613	1	0.213642	1.63908e-64	9.74904e-21	3.67895e-23	2.66309e-114
Aldh5a1	6.83192e-44	1	3.05495e-28	1.34589e-134	0	4.54223e-69	0
Aldh6a1	2.38637e-10	1	0.000362277	3.25256e-130	2.63743e-156	4.19707e-36	0
Aldh7a1	0.0010373	0.00123691	1	9.3509e-159	8.77849e-42	1.79488e-47	7.05827e-249
Aldh8a1	1	1	NA	1	0.000157617	1	4.73084e-12
Aldh9a1	0.00037403	1	1	5.26513e-87	1.56177e-45	1.83458e-34	1.49042e-174
Aldoa	9.12735e-40	1	1	1.07166e-115	8.95378e-18	4.66399e-06	5.39466e-18
Aldob	1	0.00280039	1.91974e-22	0.000117227	4.59579e-27	1	2.27367e-48
Aldoc	5.30016e-55	0.0690336	1.93283e-58	0	0	0	0
Alg1	5.68811e-06	1	0.00208551	4.04506e-77	3.23537e-53	3.18526e-53	6.62452e-195
Alg10b	1.27197e-12	1	7.66997e-08	1.06673e-73	4.3941e-165	1.55713e-38	0
Alg11	4.66888e-37	0.0963525	1.55138e-48	1.04694e-153	8.41789047384316e-320	1.66395e-85	0
Alg12	1	1	1	1.39326e-43	5.59529e-33	1.81475e-25	1.13944e-106
Alg13	0.118439	1	1	2.27885e-27	4.95326e-26	3.37916e-17	8.52177e-73
Alg14	3.01577e-11	1	8.20195e-06	2.13847e-83	2.72557e-78	2.13202e-47	NA
Alg2	1.40421e-133	1.69692e-09	1.22985e-107	5.67935e-257	0	1.69905e-121	0
Alg3	0.0147032	1	1	6.11595e-48	3.4847e-13	1.57688e-34	1.1399e-94
Alg5	1.01556e-05	1	2.2571e-05	6.31581e-103	1.63566e-59	1.11436e-82	2.01797e-243
Alg6	8.61984e-07	1	4.52882e-06	3.58304e-52	1.93873e-68	1.67966e-34	2.28672e-183
Alg8	0.00234863	1	1	1.20862e-15	3.58923e-13	8.11745e-18	6.77838e-52
Alg9	2.19237e-05	1	0.0908713	2.55435e-49	1.68085e-40	6.61486e-30	2.17722e-146
Alk	1	1	1	0.0842997	2.95104e-18	1	3.43222e-35
Alkal2	1	1	1	0.127148	2.69707e-13	1	5.41829e-16
Alkbh1	1.11517e-23	5.61651e-07	3.07616e-31	5.03597e-168	1.19406e-259	1.89522e-98	0
Alkbh2	1.51938e-05	1	1.06751e-09	5.42505e-60	2.29047e-133	4.09582e-33	2.01775e-285
Alkbh3	3.16245e-06	NA	5.41104e-05	2.77355e-51	3.61537e-23	1.79011e-23	3.63922e-120
Alkbh4	1	1	1	1.11833e-19	9.38727e-19	3.72454e-16	4.00208e-82
Alkbh5	2.51982e-23	1	1.47489e-30	4.99137e-132	4.24997e-63	7.99708e-80	7.17114e-278
Alkbh6	2.68021e-38	0.00107938	2.31101e-27	2.247e-220	3.47158e-211	8.45048e-121	0
Alkbh7	6.08209e-28	1	3.34066e-24	1.29581e-191	5.61682e-181	1.42895e-101	0
Alkbh8	1.4761e-35	0.620388	4.75922e-25	1.41308e-146	8.44601e-286	1.25798e-76	0
Alms1	2.77744e-08	1	0.000163387	4.29316e-43	3.02107e-143	1.0308e-26	5.44966e-239
Alox12	3.82589e-104	1	0	0	0	0	0
Alox5	0	1	2.91401e-237	2.12567e-45	3.28846e-138	3.10434e-13	0
Alox5ap	0	1	1.19885e-15	2.87302e-45	7.32471e-202	1.15613e-23	0
Alox8	1	1	1	5.33514e-10	3.19258e-32	0.000144954	1.37356e-67
Aloxe3	1.72511e-05	1	0.0318804	1.18676e-27	2.45171e-87	5.58846e-15	9.94194e-172
Alpk1	2.32662e-18	3.95046e-33	0.308157	2.9818e-09	0.0310674	1.81986e-69	1.43203e-14
Alpk2	1.46267e-10	1	NA	0.0143751	0	8.81785e-37	7.03931e-72
Alpl	1	1	1.16819e-36	4.20197e-104	1.15834e-12	1	5.29333e-77
Als2	6.13483e-06	1	0.00694717	5.70998e-28	5.79779e-34	1.06398e-10	2.08235e-104
Als2cl	1	1	1	1.96096e-104	1.79366e-34	0.0363958	NA
Alyref	2.57146e-11	1	4.93563e-19	8.75854e-150	5.69774e-287	5.20965e-97	0
Alyref2	1.35669e-06	1	1.38356e-09	4.21558e-75	9.64711e-101	3.5597e-60	2.92331e-291
Amacr	0.0545957	1	1	5.70578e-39	2.08379e-31	9.77463e-22	2.40185e-104
Ambra1	1.63518e-06	1	1.79578e-05	6.33202e-87	1.2135e-117	3.05248e-41	7.35677e-300
Amd1	1.37743e-22	1	4.10012e-08	1.2719e-93	3.85268e-241	1.74643e-44	0
Amd2	6.48642e-08	1	1	9.27992e-43	2.29945e-46	2.20192e-28	1.85736e-129
Amdhd2	3.10593e-09	1	7.75663e-11	3.9987e-90	1.02598e-72	5.40496e-47	5.36128e-243
Amer1	5.94321e-06	1	1	1.82914e-67	1.22109e-60	1.11204e-42	3.48278e-201
Amer2	3.68e-79	0.000448934	5.97976e-94	4.6095e-162	1.1302e-242	3.98079e-98	0
Amer3	1.96018e-07	1	0.0191542	3.92497e-42	7.19009e-120	1.00282e-16	1.56885e-223
Amfr	3.23629e-15	0.0112587	3.50343e-14	1.51483e-197	2.69569e-167	7.09289e-134	0
Amh	1	1	0.0013908	1	1.88502e-06	0.828569	4.80063e-10
Amhr2	1	1	1	7.42373e-06	1.1218e-26	0.0857702	3.60158e-49
Amigo1	5.6846e-21	7.69937e-07	3.40226e-17	1.51669e-108	0	1.42438e-56	0
Amigo2	3.65662e-36	1	2.94115e-13	9.32773e-99	0	2.53774e-69	0
Amigo3	0.961506	1	1	0.00127331	0.000249225	0.035679	4.09921e-16
Ammecr1	0.00309618	1	0.618786	1.15239e-28	7.022e-49	2.98138e-20	1.02356e-131
Ammecr1l	1.27934e-17	2.30669e-15	2.53617e-07	5.38733e-135	8.56883e-165	2.62445e-60	0
Amn	6.05284e-33	1	2.36393e-41	1.4582e-132	0	6.05072e-65	0
Amn1	5.48852e-41	0.184982	9.53252e-29	3.10712e-164	5.7139e-88	6.39384e-93	0
Amot	1	1	0.0011273	4.64926e-85	7.57056e-26	1.83369e-06	3.09213e-74
Amotl1	1.80175e-41	0.0197725	1.63304e-66	1.80353e-147	0	1.4886e-76	0
Amotl2	1.41425e-18	0.343886	3.19724e-41	2.47841e-44	1.08627e-102	1.58855e-37	9.23047e-264
Ampd2	7.53625e-35	1	3.00603e-25	1.2844e-156	0	5.52116e-79	0
Ampd3	2.02049e-06	1	0.0322626	3.28554e-52	1.79325e-152	4.76481e-172	2.98796e-302
Amph	1.20079e-68	3.23134e-07	7.15502e-57	9.93834e-226	0	4.99144e-112	0
Amt	1.19052e-09	1	0.182325	3.17027e-89	8.06373e-77	2.49188e-25	2.21891e-177
Amy1	1.71882e-10	1	3.91385e-14	6.37227e-51	8.9762e-140	1.47961e-26	1.0699e-277
Amz1	7.00275e-10	1	0.000103684	2.85601e-29	2.21952e-124	1.00137e-249	2.18056e-231
Amz2	2.86047e-19	1	2.38197e-14	4.55994e-140	1.5631e-108	3.00641e-81	0
Anapc1	4.59899e-19	1	0.000370842	1.67295e-130	4.10418e-160	3.09751e-65	0
Anapc10	6.28824e-11	1	5.49885e-07	7.15601e-97	3.92709e-82	8.65687e-74	0
Anapc11	3.10532e-56	1	1	1.00125e-53	0	4.64738e-15	0
Anapc13	0.227461	1	8.21312e-13	6.38456e-80	3.97831e-186	3.4518e-48	0
Anapc15	7.29342e-09	0.507583	4.97981e-21	7.80827e-108	4.6199e-127	1.38177e-63	0
Anapc16	8.45737e-27	1	5.10921e-08	7.24859e-169	2.55782e-240	9.69029e-89	0
Anapc2	2.034e-10	0.633333	1.1889e-16	3.63151e-139	1.34731e-87	9.38954e-88	0
Anapc4	9.63926e-11	1	5.79721e-19	7.41504e-128	1.99813e-204	2.07518e-68	0
Anapc5	2.45954e-26	0.771224	8.38251e-12	2.76896e-240	1.24561e-78	1.667e-105	0
Anapc7	5.01941e-07	0.0135765	0.000219015	2.89242e-97	5.68393e-83	5.33148e-60	2.34912e-262
Ang	0	0.00188625	1	6.50254e-11	4.54582e-101	5.86829e-16	0
Angel1	1	1	1	6.21811e-30	3.16683e-15	2.62223e-09	5.91815e-64
Angel2	1.19833e-23	1	1.17277e-14	1.0859e-186	2.20156e-158	4.42965e-100	0
Angpt1	0.0219589	1	7.01963e-05	NA	3.27388e-54	1.32727e-08	1.84735e-55
Angpt2	1	0.002387	1.70614e-45	0.118759	7.53657e-10	1	NA
Angptl1	2.54917e-05	1	1	0.0966592	6.78168e-46	1.60404e-141	1.11995e-158
Angptl2	1	2.91777e-19	3.32121e-59	1	1.94046e-07	1	3.95036e-06
Angptl4	0.130359	1.16631e-19	2.50382e-08	2.42554e-128	8.94557e-34	0.00266955	1.32726e-115
Angptl6	2.12819e-22	0.583844	1.84815e-24	2.3008e-112	1.5514e-92	2.39581e-82	0
Angptl7	1.35991e-06	1	1	0.0590909	2.10802e-24	2.18811e-22	1.72383e-40
Ank	1.26803e-57	0.0994102	1.83535e-60	9.66413e-123	0	9.98534e-115	0
Ank1	9.91209e-25	1	3.30677e-21	7.07734e-88	2.02091e-272	1.6636e-38	0
Ank2	3.07892e-167	0.0794601	3.87004e-157	2.23344e-36	0	2.84411e-116	8.33654e-208
Ank3	3.06884e-141	9.18426e-07	7.70294e-157	0	2.22949e-81	1.24028e-88	0
Ankdd1a	1	1	1	0.75828	4.30805e-13	1	9.20055e-19
Ankdd1b	1.01136e-28	1	0.794085	NA	NA	NA	NA
Ankef1	0.132935	1	0.654092	3.82717e-19	1.98014e-85	3.4209e-10	5.31586e-145
Ankfn1	3.19994e-17	1	1.52231e-71	NA	0	NA	3.27911e-64
Ankfy1	1.1278e-08	1	1.54578e-07	9.90991e-94	7.11381e-96	8.71085e-51	4.18459e-261
Ankhd1	5.09851e-11	1	1.19546e-08	1.25072e-119	6.17547e-112	3.26258e-64	0
Ankib1	6.08787e-23	1	4.36364e-16	8.79692e-131	2.52503e-229	1.42551e-63	0
Ankle1	0	3.88661e-105	0	1.08996e-182	7.25871e-71	1.43761e-124	0
Ankle2	2.19055e-05	1	0.0486299	1.43182e-93	7.68964e-95	3.45734e-54	1.77495e-246
Ankmy1	1	1	1	1	0.177137	1	2.35414e-07
Ankmy2	7.57703e-16	1	2.60658e-09	1.89023e-128	4.22247e-239	1.80804e-67	0
Ankra2	1.01828e-36	2.89119e-05	2.82489e-35	6.77952e-188	2.08542e-67	2.00203e-115	0
Ankrd1	1.1674e-06	1	NA	NA	0.0220704	NA	0.00911782
Ankrd10	4.76841e-16	0.0536984	5.37618e-13	1.91779e-161	3.49342454664491e-317	1.67702e-88	0
Ankrd11	7.4393e-08	1	0.0477898	1.33137e-70	3.81871e-08	0	7.57275e-241
Ankrd12	1.67154e-41	0.0774913	2.71192e-07	5.75587e-129	1.44053e-90	3.79318e-66	6.16631e-306
Ankrd13a	2.95443e-10	1	0.00708142	2.23129e-82	6.90952e-290	7.23708e-31	1.8006e-280
Ankrd13b	3.82144e-18	1	8.88949e-18	7.05874e-90	2.64236e-71	5.49921e-40	8.79585e-233
Ankrd13c	1.21054e-18	0.300036	3.66467e-16	8.33157e-146	1.98814e-149	3.16992e-83	0
Ankrd13d	4.98805e-26	0.0873097	7.35473e-29	3.02593e-133	0	3.81662e-75	0
Ankrd16	2.04763e-06	1	7.85974e-07	1.8599e-75	5.8134e-113	3.35471e-38	4.85629e-247
Ankrd17	1.61271e-35	1	9.38355e-42	9.84524e-228	0	8.64274e-118	0
Ankrd2	8.54196e-05	1	9.62114e-22	0.00131058	1.11862e-30	1.92854e-05	3.73094e-78
Ankrd23	1	1	1	1	NA	1	1.20117e-05
Ankrd24	5.55792e-35	0.635478	1.09047e-33	6.16838e-166	7.67511e-290	3.69306e-93	0
Ankrd26	1.59962e-25	1	5.91995e-17	2.60786e-135	4.94211e-109	3.96897e-94	0
Ankrd27	0.745474	1	NA	2.38712e-40	1.47117e-31	4.26972e-22	2.51921e-124
Ankrd28	2.0845e-12	1	4.9995e-07	5.64959e-57	7.00002e-305	7.79233e-40	2.59279e-280
Ankrd29	2.15615e-08	1	0.721154	3.83464e-53	3.32711e-140	2.56574e-30	2.99002e-248
Ankrd33b	1	1	4.21942e-10	2.98433e-07	4.11612e-43	1.72701e-05	2.47372e-44
Ankrd34a	7.1669e-21	1	2.82873e-22	5.24817e-82	5.1298e-253	1.53993e-46	0
Ankrd34b	1.16716e-30	1	1.45521e-20	5.09959e-91	0	1.53778e-51	0
Ankrd34c	1.65967e-09	1	3.27391e-08	1.91721e-40	1.26976e-133	5.47265e-21	1.75655e-234
Ankrd35	9.98834e-05	1	0.0648399	2.9662e-38	4.14852e-57	1.73084e-19	2.25445e-138
Ankrd37	4.16726e-22	1	6.49564e-68	9.47811e-93	1.7943e-181	4.46107e-55	0
Ankrd39	1.38602e-23	1	2.20637e-15	2.20279e-143	1.03863e-66	2.96824e-69	2.17681e-305
Ankrd40	9.61997e-13	1	0.00252976	6.86346e-118	2.7912e-286	3.44079e-70	0
Ankrd42	1.09542e-08	1	0.00238842	9.39625e-37	2.98862e-98	2.57904e-17	1.36962e-193
Ankrd44	2.2852e-65	1	0.0431226	1.05208e-100	3.48712e-161	1.50335e-104	0
Ankrd45	9.47063e-15	1	2.57914e-07	4.48563e-58	1.9091e-148	3.26739e-23	4.7597e-290
Ankrd46	4.7619e-49	1	1.18292e-27	1.06656e-228	8.03371e-125	6.27551e-131	0
Ankrd49	0.000402309	1	1.53144e-08	5.27986e-62	1.17628e-43	5.99718e-41	7.19328e-175
Ankrd50	1.31343e-12	1	9.4117e-35	2.18254e-95	8.52635e-200	3.53678e-47	0
Ankrd52	1	1	1	9.21703e-10	1.03117e-17	1.30959e-05	8.63679e-45
Ankrd54	2.08549e-09	0.210343	1.98659e-10	3.14233e-113	1.81629e-93	1.77884e-62	0
Ankrd55	6.97981e-18	1	8.08012e-22	8.96617e-79	6.17394e-256	4.74789e-41	0
Ankrd6	3.14861e-31	1	7.72691e-21	1.00326e-117	0	1.99458e-60	0
Ankrd9	5.41336e-10	1	1.67654e-08	5.99323e-93	9.12317e-111	4.68358e-36	3.10111e-298
Anks1	1	1	0.0137757	9.68534e-109	2.15296e-10	9.96935e-17	1.20624e-103
Anks1b	3.0905e-103	0.000311548	5.17281e-114	1.6313871738308e-316	1.85896e-77	8.82194e-66	2.57818e-131
Anks3	3.58368e-14	1	2.24897e-09	2.15655e-129	4.10824e-159	1.21886e-62	0
Anks6	1	1	1	9.50543e-07	3.3803e-12	6.96688e-07	1.74853e-36
Ankub1	2.11694e-08	1	7.86976e-10	6.16426e-42	0	3.51552e-21	0
Ankzf1	1.46478e-07	1	2.8591e-10	1.64505e-90	8.07375e-96	1.44267e-41	1.26718e-281
Anln	4.17002e-35	1	4.73367e-32	6.45653e-149	0	3.28003e-82	0
Ano1	1	1	4.08357e-209	1.9629e-06	5.35748e-28	0.0894524	5.6041e-44
Ano10	0.000361697	0.774105	0.0349214	4.72215e-44	1.2389e-24	1.24912e-32	7.08729e-128
Ano2	1	1	7.30389e-07	1	2.27289e-12	1	1.12572e-14
Ano3	5.73487e-09	1	2.58488e-08	9.60364e-48	5.93107e-167	4.61952e-18	3.07394e-284
Ano4	1.25282e-12	1	0.00645301	1.01282e-57	1.79908e-265	2.17763e-18	6.17242e-179
Ano5	1	1	1	0.111914	2.52362e-21	1	7.11637e-39
Ano6	0.00168262	1	2.35133e-47	1.54686e-72	9.05263e-266	3.6546e-41	8.81086285483358e-314
Ano7	1	1	1	5.13915e-05	1.08102e-30	5.16424e-10	1.44527e-59
Ano8	7.34334e-14	1	1.71758e-11	7.57543e-76	2.7617e-134	1.01995e-32	3.9841170193478e-312
Anp32a	2.65252e-19	1	1.29885e-173	9.17658e-92	6.31812e-70	1.77701e-70	3.34909e-205
Anp32b	6.1964e-09	1	5.90179e-71	1.50341e-185	2.39492e-174	5.65149e-97	0
Anp32e	1.16049e-09	1	3.08278e-30	3.67502e-157	1.39642e-99	4.69551e-93	0
Anpep	6.9729e-13	3.76801e-38	0	0	5.05696e-108	7.36951e-169	0
Antxr1	0.157245	1	1	1.61653e-56	4.7084e-35	1.89272e-25	7.7565e-106
Antxr2	1	4.25122e-17	6.63589e-31	0.40777	1.48905e-73	0.00790052	1.31478e-27
Anxa11	6.10318e-13	1	3.05937e-98	7.801e-12	1.40592e-32	1.12029e-05	1.52644e-48
Anxa2	1	3.36357e-25	1.42193e-152	5.77486e-47	1.38083e-137	4.40178e-11	6.93004e-102
Anxa3	0	1	2.86842e-244	5.3688e-52	1.32362e-227	6.40301e-39	0
Anxa4	7.48844e-24	1	1.83438e-21	1	NA	1	3.3768e-25
Anxa5	2.73128e-48	0.00147916	4.60071e-167	1.59395e-161	0	2.21304e-91	0
Anxa6	3.81709e-06	1	1.1598e-24	6.60575e-81	6.01537e-234	NA	0
Anxa7	9.34626e-09	0.0789475	7.79436e-95	1.65836e-128	4.7475e-296	4.89561e-71	0
Anxa9	1	1	1	1	0.0120767	1	7.09581e-10
Aoc2	1	1	1	0.000785885	2.97538e-22	0.000580278	2.15928e-38
Aoc3	0.343885	1.66661e-35	2.13108e-212	1	1.87238e-24	0.708766	5.62161e-43
Aox1	1	1	1	1.39679e-100	1.32824e-08	1	7.75506e-49
Aox2	0	3.1339e-101	2.64951e-237	0	6.39405e-196	0	0
Ap1ar	2.52327e-41	0.545583	2.92853e-28	2.08506e-243	0	5.20996e-128	0
Ap1b1	1.01733e-22	0.349825	2.41061e-49	1.25323e-215	0	2.4126e-114	0
Ap1g1	2.85793e-25	0.146773	4.1729e-32	1.25759e-176	4.67745e-286	7.01712e-87	0
Ap1g2	0.48553	1	1	6.29993e-17	3.49752e-29	9.66187e-07	1.08446e-61
Ap1m1	1.20523e-12	1	4.36794e-10	3.02644e-151	7.43967e-167	1.12086e-90	0
Ap1s1	2.28423e-32	0.244789	6.44956e-37	1.51544e-232	9.45745e-162	2.2529e-110	0
Ap1s2	1.79061e-23	3.2308e-06	3.26956e-36	3.36033e-225	0	2.00339e-91	0
Ap1s3	1	1	1	2.72697e-09	7.7248e-53	5.37277e-06	5.85015e-103
Ap2a1	2.28673e-70	2.99708e-07	1.40853e-84	1.59042e-276	0	2.55088e-34	0
Ap2a2	1.52417e-54	0.0239793	1.00377e-43	2.55519e-183	0	3.58637e-40	0
Ap2b1	7.79152e-10	1	1.38199e-13	3.46137e-181	2.09313e-184	2.06655e-107	0
Ap2m1	5.73372e-25	1	1	1.43862e-74	5.36368e-41	7.56168e-14	3.08083e-158
Ap2s1	2.05853e-05	1	0.012585	2.48877e-29	4.9537e-157	6.62411e-22	1.00617e-82
Ap3b1	8.99832e-12	1	1.70964e-05	5.30404e-63	6.5537e-60	2.3367e-34	3.07308e-207
Ap3b2	1.86309e-61	0.00177439	1.78137e-59	4.93893e-202	7.47669e-276	9.96485e-116	0
Ap3d1	1.68772e-30	0.101016	1.85606e-23	8.89446e-192	0	2.95766e-110	0
Ap3m1	4.56445e-10	1	2.47378e-05	1.05994e-108	7.28771e-56	1.98365e-63	4.06569e-249
Ap3m2	1.01371e-38	0.414942	1.34014e-44	6.36928e-178	0	4.70436e-99	0
Ap3s1	1.02197e-25	0.414523	2.77119e-27	4.20727e-231	0	3.53554e-114	0
Ap3s2	6.80936e-22	1	5.54341e-18	6.73838e-140	1.29276e-114	2.57186e-92	0
Ap4b1	1	1	1	2.64742e-21	2.34956e-10	3.55422e-08	6.59143e-58
Ap4e1	0.0768435	1	1	5.8014e-36	1.64648e-26	1.03127e-14	1.56406e-91
Ap4m1	1.93957e-05	1	2.00697e-17	2.03462e-57	6.57534e-62	1.11817e-23	1.47966e-177
Ap4s1	4.20638e-37	0.717797	2.84011e-30	4.62448e-213	1.29932e-236	4.53737e-120	0
Ap5b1	8.83419e-10	1	1	1	0.00144367	1	1.04796e-07
Ap5m1	1.41491e-12	1	0.0650247	1.30049e-75	1.90119e-82	2.33883e-47	4.98057e-248
Ap5s1	2.06573e-14	1	2.7898e-15	5.14474e-132	6.12654e-92	1.82341e-73	0
Ap5z1	0.00776174	1	1.10329e-06	3.73657e-40	2.34723e-95	1.65627e-25	1.92759e-117
Apaf1	1	1	1	3.0081e-32	3.90457e-61	4.77559e-17	1.69797e-137
Apba1	1.378e-44	0.565219	2.21787e-27	2.32759e-196	7.74597e-299	8.16999e-93	0
Apba2	2.04129e-62	0.0100915	7.79531e-57	1.5764e-179	0	1.14128e-95	0
Apba3	0.00160991	1	1	4.52709e-61	1.82862e-24	1.8929e-25	5.42084e-106
Apbb1	1.58268e-72	1	1.36196e-44	2.5923e-197	0	1.12806e-44	0
Apbb1ip	0	1	1.44962e-17	4.08043e-39	NA	2.54479e-16	0
Apbb2	6.99295e-57	0.00649617	1.68533e-13	3.25966e-235	0	5.57694e-101	0
Apc	3.52744e-28	4.2896e-10	2.62515e-32	6.00654e-244	4.70956e-108	1.70595e-132	0
Apc2	1.94667e-76	0.00605938	9.65874e-49	7.91947e-198	0	8.28274e-121	0
Apeh	8.84521e-05	1	1.86496e-07	2.83463e-59	1.94395e-137	1.11936e-33	9.75592e-281
Apex1	3.4995e-18	1	1.28393e-21	2.34842e-143	1.9025e-193	5.95234e-80	0
Apex2	0.208438	1	1	4.1023e-24	8.98046e-27	9.36138e-12	3.81634e-88
Aph1a	3.02261e-06	1	0.0419998	3.34408e-128	2.79761e-69	1.41197e-68	0
Aph1b	1.01098e-24	1	3.30079e-07	2.34485e-96	2.79931e-124	4.11817e-73	0
Aph1c	1	1	1	2.03546e-50	2.74075e-12	3.8903e-42	8.54794e-92
Api5	1.5044e-09	1	2.38657e-18	9.87537e-137	3.38532e-97	1.7683e-79	0
Apip	6.17789e-08	1	0.00578171	6.37828e-92	2.63083e-39	1.48381e-58	5.01746e-209
Apln	7.47554e-06	1	0.00064766	5.98887e-45	3.77636668125173e-314	2.93115e-18	1.42262349007949e-317
Aplp1	6.28459e-112	0.003963	2.60931e-116	0	0	2.24101e-202	0
Aplp2	5.52261e-96	1	3.99628e-07	2.20218e-135	2.28038e-147	9.0715e-05	4.76566e-212
Apmap	1.79794e-08	1	5.19892e-11	5.82696e-101	2.39435e-264	1.06478e-61	0
Apoa1	1.3525e-15	1	2.6199e-15	8.136e-64	1.66386e-169	5.06183e-30	0
Apoa2	1.35912e-07	1	5.53488e-05	6.22828e-35	1.70386e-134	1.18478e-15	6.22797e-231
Apobec1	3.80364e-287	7.67765e-13	1.39591e-67	4.76052e-23	1.50823e-57	2.64849e-13	0
Apobec3	3.13597e-182	1	3.00376e-21	1.32475e-33	5.32585e-56	2.10682e-21	0
Apobr	4.17464e-21	1	4.29548e-17	1	2.79029e-28	0.163314	8.55103e-117
Apoc1	1	1	1	1.13964e-197	3.00584e-24	0.073938	1.2712e-82
Apoc3	1	1	9.26126e-10	1	3.20624e-22	2.13536e-21	5.55961e-33
Apod	2.94772e-70	1.22867e-165	2.42854e-61	0	0	8.20046e-156	0
Apoe	0.0141576	5.55509e-09	3.04101e-19	0	0	0	0
Apoh	1	1	1	0.00397082	1	1	0.00187431
Apol6	5.65455e-154	5.20265e-23	NA	0	4.12505e-73	NA	6.22012e-158
Apol8	1	1	1	5.80179e-08	1.28578e-24	0.00699361	5.78832e-49
Apol9a	0.000313459	1	1	1.66767e-06	1.69499e-30	1	6.31033e-09
Apold1	0.00990526	1	0	2.20779e-16	3.74997e-61	1.58381e-06	1.76042e-137
Apoo	3.39403e-24	1	4.2372e-17	1.54071e-120	1.71161e-187	1.18713e-81	0
Apool	1	1	1	2.26547e-12	6.99495e-16	0.00264915	2.32227e-39
[truncated: 15,628 more rows]
