# Supplementary material for: Molecular and anatomical characterization of parabrachial neurons and their axonal projections
Source: eLife. 2022 Nov 1;11:e81868. doi: 10.7554/eLife.81868 (PMC9668336; doi:10.7554/eLife.81868)
Supplement: Supplementary file 2. [file elife-81868-supp2.xlsx]

## Sheet: average
	N1	N2	N3	N4	N5	N6	N7	N8	N9	N10	N11	N12	N13	N14	N15	N16	N17	N18	N19	N20	N21
0610005C13Rik	0	0.0232537	0	0.0208318	0.00520831	0.0140182	0	0.0160851	0.0155273	0.010767	0.00828148	0.00767256	0.00765299	0.00558656	0.0125467	0.00469482	0.00495866	0.0141124	0.0068728	0.0144399	0.00257069
0610009B22Rik	0.644571	0.253103	0.335446	0.726148	0.476549	0.591134	0.536524	0.585306	0.453264	0.464902	0.517028	0.461684	0.641345	0.463655	0.549145	0.462236	0.560302	0.43752	0.457006	0.460126	0.45694
0610009O20Rik	0.126424	0.0464949	0.0126579	0.0832372	0.124677	0.0886688	0.1053	0.104368	0.108483	0.0913936	0.0868473	0.074101	0.0993264	0.0837011	0.0889667	0.0703645	0.084198	0.0825674	0.0652458	0.108093	0.0847315
0610010F05Rik	0.140384	0.139086	0.201172	0.247466	0.232281	0.36125	0.275618	0.29593	0.264003	0.216343	0.225819	0.183118	0.289314	0.275819	0.276271	0.26451	0.226166	0.216057	0.200262	0.136757	0.199194
0610010K14Rik	0.644571	0.0928896	0.542601	0.590144	0.504382	0.638059	0.41845	0.536842	0.541473	0.486622	0.491374	0.470894	0.476644	0.537925	0.520693	0.621235	0.492272	0.422776	0.612712	0.35699	0.59205
0610012G03Rik	1.54586	1.26368	1.39149	1.60783	1.56487	1.43103	1.45342	1.51109	1.34044	1.37091	1.38178	1.33317	1.35834	1.40293	1.44364	1.31478	1.38211	1.28621	1.38312	1.30283	1.39308
0610030E20Rik	0.140384	0.16208	0.359307	0.247466	0.332387	0.325972	0.273501	0.233789	0.293888	0.267329	0.293888	0.270352	0.202691	0.302622	0.28713	0.309585	0.272643	0.25333	0.259395	0.197274	0.259295
0610037L13Rik	0.154316	0.364001	0.382974	0.462501	0.376461	0.299252	0.381861	0.28049	0.416431	0.291933	0.335297	0.316919	0.249941	0.41276	0.405369	0.340783	0.326405	0.311472	0.302359	0.221999	0.279137
0610040B10Rik	0.112439	0.0232537	0.113679	0.145321	0.114334	0.185844	0.183582	0.146924	0.133147	0.152836	0.140326	0.150328	0.15247	0.117051	0.14752	0.126424	0.141674	0.130676	0.167599	0.0829374	0.10776
0610040F04Rik	0	0	0.063249	0.0624594	0.0208318	0.0186905	0.0351576	0.0187657	0.0186325	0.0376761	0.0103518	0.0179019	0.0127548	0.0279293	0.0276	0.0187782	0.021486	0.0241912	0.0229075	0.0036101	0.0102826
0610043K17Rik	0	0	0.0758765	0.0208318	0.0260387	0.0140182	0.0087911	0.0160851	0.0186325	0.01615	0.012422	0.01023	0.0255074	0.011173	0.0250915	0.0187782	0.00826437	0.0221756	0.016036	0.0036101	0.0257041
1010001B22Rik	0.0281653	0.0232537	0	0	0.00520831	0.0186905	0.00659336	0.00268096	0.00621114	0.0148043	0.0103518	0.00255754	0.0127548	0.00558656	0.0100375	0.00938953	0.00991719	0.00403225	0.00572735	0.0108301	0.0102826
1110002L01Rik	0.0984325	0	0.063249	0.0832372	0.0884264	0.0886688	0.10967	0.128334	0.0806579	0.106126	0.0909718	0.0817503	0.104402	0.13368	0.130122	0.0703645	0.0627687	0.080558	0.0858053	0.0180496	0.0667884
1110004E09Rik	0.345215	0.116019	0.3474	0.366725	0.332387	0.308183	0.408338	0.406908	0.323519	0.318927	0.391573	0.329067	0.249941	0.329216	0.332604	0.32745	0.234216	0.216057	0.263825	0.200814	0.216807
1110004F10Rik	1.61807	1.06562	1.36145	1.39606	1.48703	1.40753	1.51961	1.50657	1.52399	1.42421	1.59646	1.59418	1.61843	1.41837	1.63858	1.42244	1.57849	1.60602	1.4824	1.60135	1.57263
1110006O24Rik	0	0	0	0	0.0156244	0.0140182	0.0197789	0.0134044	0.012422	0.0148043	0.0165624	0.0204589	0.00765299	0	0.0112921	0.014084	0.0165282	0.0120965	0.0103091	0.00722015	0.0102826
1110008F13Rik	0.423818	0.069711	0.788977	0.742399	0.504382	0.618653	0.600598	0.534505	0.592118	0.612409	0.590363	0.58933	0.561812	0.669518	0.671172	0.640703	0.709267	0.560856	0.584672	0.417379	0.552444
1110008L16Rik	0.014084	0.0464949	0.0379656	0	0.0416546	0.0280337	0.0373539	0.0562706	0.0217374	0.0322959	0.0600054	0.0230159	0.0459022	0.0558369	0.0501672	0.0703645	0.042962	0.0342675	0.045803	0.0180496	0.0411195
1110008P14Rik	1.11818	1.28778	1.3306	1.42484	1.20053	1.46229	1.44952	1.44603	1.39829	1.33106	1.38178	1.22765	1.25006	1.39513	1.56119	1.46444	1.58371	1.40698	1.29727	1.35813	1.11293
1110012L19Rik	0.112439	0.0928896	0.213563	0.287682	0.176171	0.153601	0.157589	0.199742	0.15773	0.13952	0.197472	0.188146	0.190178	0.237971	0.179709	0.145031	0.149852	0.19038	0.1495	0.12602	0.168862
1110015O18Rik	0	0	0.0126579	0.0416546	0.0312449	0.0280337	0.0614997	0.152226	0.120824	0.0779828	0.0641382	0.0434646	0.127208	0.016759	0.0050188	0.0469311	0.01157	0.0403117	0.0400809	0.00722015	0.0257041
1110017D15Rik	0	0.0464949	0.0884921	0.0416546	0.405465	0.0607104	0.377764	0.431523	0.151593	0.197898	0.140326	0.0995796	0.038256	0.0892669	0.14752	0.0937593	0.138401	0.0584345	0.124535	0.0433078	0.0565252
1110019D14Rik	0.0281653	0.0232537	0.0253138	0	0	0.00467288	0.0197789	0.0268064	0.0155273	0.01615	0.0310509	0.0281293	0.0255074	0.0279293	0.0276	0.014084	0.0231384	0.0161283	0.0148906	0.021659	0.0282739
1110020A21Rik	0	0.0464949	0	0.0416546	0.0104165	0.00467288	0.00659336	0.0214461	0.0186325	0.0134585	0.00621114	0.0127874	0.0102039	0.011173	0.00752816	0.023472	0.00991719	0.00403225	0.00801824	0.0252681	0.0128531
1110032A03Rik	0.524863	0.253103	0.475544	0.693147	0.6806	0.567221	0.724064	0.833178	0.560285	0.62253	0.773523	0.739046	0.596622	0.571697	0.694401	0.55752	0.610878	0.470366	0.586619	0.260579	0.484658
1110032F04Rik	0	0.230511	0.063249	0.103979	0.0468579	0.107271	0.111855	0.117691	0.0527705	0.104788	0.0165624	0.0153447	0.040805	0.0223445	0.0376323	0.060995	0.0363556	0.0423261	0.0641027	0.165311	0.0667884
1110034G24Rik	0.140384	0.116019	0.1763	0.165905	0.109158	0.190436	0.135846	0.181311	0.136224	0.13552	0.13212	0.170528	0.0891675	0.0837011	0.152482	0.112439	0.143311	0.128677	0.0915103	0.108093	0.133281
1110035H17Rik	0.0563083	0.0928896	0.126247	0.0416546	0.0780457	0.0793559	0.0899884	0.0830145	0.071368	0.0564975	0.0641382	0.0511286	0.040805	0.0837011	0.0702058	0.089084	0.0594691	0.0624594	0.0766717	0.0324853	0.0667884
1110038F14Rik	0.291624	0.407253	0.299308	0.366725	0.376461	0.321534	0.379813	0.324057	0.34703	0.286767	0.385803	0.343584	0.225134	0.392109	0.476156	0.371666	0.370011	0.282517	0.280389	0.377268	0.274187
1110046J04Rik	0.223487	0.0928896	0.1763	0.0832372	0.206855	0.181249	0.228769	0.288218	0.242945	0.256922	0.140326	0.119917	0.175124	0.161311	0.188345	0.149675	0.115446	0.134673	0.137028	0.0757398	0.125633
1110051M20Rik	0.223487	0.16208	0.311399	0.554481	0.467193	0.472837	0.488081	0.654642	0.562957	0.457615	0.478432	0.498302	0.442091	0.42814	0.484016	0.440968	0.464146	0.493799	0.493982	0.333153	0.502948
1110059E24Rik	0.423818	0.2979	0.55357	0.347152	0.567931	0.396103	0.576349	0.539177	0.643995	0.515255	0.527928	0.466294	0.49032	0.51837	0.656876	0.48331	0.561725	0.543421	0.505158	0.305686	0.440617
1110059G10Rik	0.140384	0.16208	0.225921	0.287682	0.237349	0.190436	0.202999	0.27016	0.200517	0.196578	0.225819	0.238152	0.249941	0.13368	0.278687	0.186707	0.197069	0.227862	0.152897	0.239579	0.194151
1110065P20Rik	1.02317	0.864833	1.23277	1.43428	1.40332	1.22799	1.48417	1.49403	1.32821	1.32172	1.39346	1.32431	1.19476	1.15219	1.45369	1.23949	1.3302	1.16304	1.12849	1.20969	1.16371
1190002N15Rik	0.209727	0.0928896	0.0884921	0.165905	0.119507	0.0607104	0.0483328	0.123014	0.049669	0.0511217	0.0827214	0.0970344	0.172611	0.066989	0.0877168	0.112439	0.125292	0.0725171	0.060673	0.0757398	0.166327
1190005I06Rik	0.042241	0.0928896	0.163823	0.103979	0.129843	0.0560454	0.0746559	0.141617	0.123906	0.123508	0.189343	0.0613426	0.0866263	0.2434	0.244727	0.117103	0.143311	0.164579	0.123398	0.129601	0.0872927
1190007I07Rik	0.112439	0.0928896	0.151321	0.103979	0.337317	0.254261	0.305133	0.404434	0.269999	0.335526	0.251983	0.267884	0.267217	0.270435	0.379764	0.237206	0.337366	0.280578	0.254961	0.136757	0.271709
1300002E11Rik	0.0281653	0.0232537	0.0253138	0.165905	0.0676567	0.046712	0.0768474	0.0749967	0.058972	0.0927338	0.078594	0.089395	0.0866263	0.066989	0.111438	0.0984325	0.07596	0.0624594	0.0641027	0.100912	0.0667884
1500002C15Rik	0.014084	0.0464949	0.0126579	0	0.0208318	0.0233624	0.0263706	0.0214461	0.0186325	0.0269147	0.0207025	0.0179019	0.0204067	0.016759	0.0313625	0.0469311	0.0231384	0.0181442	0.0194719	0.0360932	0.0205641
1500009C09Rik	1.33806	0.65076	1.16993	1.19476	1.4413	1.0864	1.31356	1.59051	1.15626	1.34494	1.38763	1.38855	0.846682	1.06578	1.32854	1.10423	1.40069	1.05513	1.07152	1.08482	0.969406
1500009L16Rik	0.209727	0.0928896	0.750361	0.287682	0.774409	0.455995	0.804777	0.665577	0.781379	0.612409	0.812402	0.725061	0.49032	0.66498	1.42325	0.778197	1.15705	0.96572	0.626098	0.4989	0.480062
1500011B03Rik	1.42458	1.17526	1.96398	1.73628	1.92784	1.6931	1.87263	1.87216	1.76197	1.80301	1.91233	2.02079	1.77143	1.66676	1.90047	1.65332	1.79412	1.87613	1.87246	1.60554	1.81437
1500011K16Rik	0.891298	0.512193	1.19827	0.896029	1.0892	0.881374	1.00325	1.06547	1.1165	1.08181	1.13894	1.0981	0.893944	1.08626	1.04504	1.00207	0.948678	1.10424	1.08479	1.01273	0.979596
1500015A07Rik	0.154316	0.207804	0.0758765	0.247466	0.165905	0.162831	0.157589	0.117691	0.114655	0.124844	0.134173	0.089395	0.142376	0.155794	0.141311	0.135733	0.115446	0.110661	0.121124	0.0937255	0.0898533
1500035N22Rik	0	0	0.0506113	0.0208318	0.0780457	0	0.0395501	0.0910271	0.0372585	0.0417107	0.0620719	0.0689989	0.0331572	0.011173	0.0514202	0.014084	0.0347038	0.0201599	0.0229075	0.0108301	0.00771201
1600002K03Rik	0.042241	0.207804	0.0758765	0.0416546	0.124677	0.0607104	0.144551	0.13365	0.123906	0.131518	0.0909718	0.074101	0.0484504	0.072562	0.127633	0.0797277	0.112161	0.0765382	0.0766717	0.0433078	0.0796074
1600012H06Rik	0.0281653	0.253103	0.0506113	0.124677	0.0624594	0.0560454	0.0285675	0.0910271	0.0403617	0.0484333	0.0620719	0.033242	0.0484504	0.066989	0.0814657	0.0703645	0.0660676	0.0342675	0.0492355	0.05052	0.0488238
1600014C10Rik	0.0984325	0.116019	0.1763	0.124677	0.272651	0.258784	0.256518	0.283068	0.179164	0.255619	0.225819	0.22071	0.306407	0.2434	0.303955	0.241769	0.27901	0.225896	0.208116	0.0757398	0.211781
1600020E01Rik	0.195927	0.16208	0.101094	0.206855	0.186418	0.153601	0.164098	0.197113	0.194425	0.189972	0.160797	0.157911	0.149948	0.199786	0.195736	0.145031	0.174322	0.170543	0.146101	0.129601	0.130733
1700001F09Rik	0	0	0	0	0.0104165	0	0	0	0	0	0	0.00255754	0.101865	0	0	0	0	0.00403225	0	0	0
1700001L19Rik	0.0844068	0.207804	0.418092	0.103979	0.6806	0.317089	0.703226	0.892702	0.711677	0.800138	0.613046	0.58281	0.548596	0.392109	0.825283	0.487502	0.888369	0.950889	0.56312	0.168871	0.426537
1700001O22Rik	0	0	0.0506113	0.0832372	0.0572604	0.065374	0.0461375	0.0402036	0.0372585	0.0309506	0.078594	0.0792011	0.0815423	0.13368	0.0514202	0.0516203	0.0545184	0.0443403	0.0560989	0.0252681	0.0693531
1700003E16Rik	0.0703645	0.0464949	0.0884921	0.0416546	0.119507	0.0746969	0.12713	0.194482	0.0620719	0.103449	0.101276	0.109754	0.040805	0.0558369	0.0814657	0.089084	0.0710147	0.0684948	0.0755295	0.00722015	0.0693531
1700003F12Rik	0.0281653	0	0.0506113	0.0208318	0.129843	0.0233624	0.0175815	0.0883568	0.123906	0.0430553	0.0269119	0.0230159	0.104402	0.216189	0.00878282	0.0187782	0.0545184	0.152632	0.0755295	0	0.211781
1700007G11Rik	0	0.0232537	0.0126579	0	0.00520831	0	0.00439559	0.00804281	0.00621114	0.00134589	0.0103518	0.00767256	0.00255102	0.00558656	0.00878282	0.00469482	0.00661152	0.0100805	0.00572735	0.0108301	0.00514137
1700007K13Rik	0	0.0464949	0.0253138	0	0.191535	0.0186905	0.181421	0.210244	0.0651712	0.076641	0.0579386	0.033242	0.0127548	0.011173	0.0276	0.0328579	0.0380074	0.0120965	0.0515236	0.0144399	0.00514137
1700008J07Rik	0.042241	0	0.0379656	0.0624594	0.0260387	0.0327045	0.0373539	0.0348455	0.0372585	0.0457445	0.0434646	0.0485742	0.0255074	0.016759	0.0439006	0.060995	0.039659	0.0241912	0.0355023	0.0180496	0.0411195
1700008O03Rik	0.0703645	0.0928896	0.126247	0.145321	0.150473	0.121198	0.1489	0.162819	0.227837	0.147513	0.11157	0.0638951	0.202691	0.18882	0.148761	0.145031	0.166176	0.124677	0.143833	0.0288769	0.176461
1700010I14Rik	0	0.0232537	0.0758765	0	0.0624594	0.00934566	0.0417461	0.0455606	0.0186325	0.0309506	0.0372585	0.0383538	0.0102039	0.011173	0.0363784	0.0281653	0.0363556	0.0322525	0.0171813	0.0036101	0.0154236
1700011D18Rik	0	0	0.0126579	0	0.00520831	0	0.0087911	0.00804281	0.00310559	0.0121128	0.0144922	0.00511507	0	0	0.0050188	0	0.00495866	0.00403225	0.00458189	0	0.00257069
1700012B09Rik	0	0	0	0.0208318	0.429391	0.00934566	0.179258	0.301061	0.0248422	0.0699295	0.191376	0.0383538	0.00510202	0.00558656	0.00752816	0	0.0132228	0.0141124	0.0652458	0.0144399	0.0334128
1700012C14Rik	0	0.0232537	0.0126579	0	0.0156244	0	0.0175815	0.0187657	0.00310559	0.00269179	0.0248422	0.0281293	0.00255102	0.00558656	0.00878282	0.00469482	0.00991719	0.0100805	0.00801824	0.0036101	0.00514137
1700013F07Rik	0	0	0	0	0.0156244	0	0.00659336	0.0053619	0.00931664	0.010767	0	0	0.00510202	0.00558656	0.0138013	0.00469482	0.00330578	0.00604835	0.00114548	0.0180496	0.00514137
1700016D06Rik	0	0	0.0253138	0	0.0104165	0.00467288	0	0.0053619	0.00310559	0.00538355	0.012422	0	0.00255102	0	0.00376411	0	0.00165289	0.00604835	0	0	0
1700016K19Rik	0	0	0	0.0208318	0.181297	0	0.0943654	0.244214	0.0651712	0.110141	0.0827214	0.0792011	0.00255102	0.011173	0.0526733	0.0281653	0.0165282	0.0201599	0.0400809	0.00722015	0.00514137
1700017B05Rik	0	0	0.0126579	0.0416546	0.0364503	0.0420437	0.0197789	0.0241263	0.0248422	0.0349861	0.0248422	0.0255727	0.0306075	0.0223445	0.0263458	0.00938953	0.0165282	0.0302373	0.0251978	0.0144399	0.0102826
1700018L02Rik	0.0563083	0.069711	0	0	0.0260387	0.0327045	0.0131864	0.0241263	0.0217374	0.0201871	0.0165624	0.0127874	0.0127548	0.0223445	0.0250915	0.0187782	0.0148755	0.0302373	0.0148906	0.0180496	0.0231342
1700019D03Rik	0.195927	0.0232537	0.0884921	0.227207	0.0780457	0.0886688	0.0285675	0.0616232	0.11774	0.0954137	0.0868473	0.0613426	0.122145	0.122598	0.0939646	0.126424	0.108876	0.126677	0.0800976	0.0433078	0.117978
1700019L13Rik	0	0.0232537	0.0126579	0	0	0.0140182	0.0197789	0.0268064	0.0155273	0.0215327	0.00828148	0.00511507	0.00765299	0.016759	0.0100375	0.00469482	0.00661152	0.00604835	0.0183266	0.0397008	0.0154236
1700020I14Rik	0.436692	0.342124	0.720763	0.896029	0.366725	0.858054	0.353059	0.387047	0.533357	0.329152	0.291903	0.290034	0.719467	0.829076	0.309945	0.682787	0.324836	0.422776	0.539335	0.644069	0.705951
1700020L24Rik	0	0	0.0126579	0.0624594	0.00520831	0.0373745	0.00659336	0.0107237	0	0.010767	0.00414077	0.00255754	0.0229572	0	0.00250941	0.014084	0.00991719	0.00201613	0.0125999	0.021659	0.0205641
1700021F05Rik	0.250881	0.407253	0.225921	0.536404	0.30265	0.417658	0.359255	0.324057	0.329414	0.325321	0.283953	0.235664	0.35955	0.386921	0.363345	0.34964	0.36537	0.307625	0.275979	0.32288	0.274187
1700021N21Rik	0	0	0	0	0.0104165	0	0.0087911	0.00804281	0.0186325	0	0.00207039	0	0.0102039	0.011173	0.0138013	0.00469482	0.00495866	0.0120965	0.00229095	0	0.00257069
1700023F06Rik	0.0984325	0.116019	0.45273	0.709731	0.504382	0.330404	0.578225	0.693683	0.581565	0.59769	0.410715	0.379567	0.546385	0.355587	0.618521	0.419511	0.432656	0.49021	0.442465	0.211418	0.386214
1700025G04Rik	0.656125	0.5326	0.942662	0.866565	0.746436	0.610832	1.08979	1.0235	0.731213	0.742726	0.917504	0.540996	0.383395	0.381723	0.746715	0.799415	0.635658	0.531126	0.531344	0.312575	0.552444
1700026J14Rik	0	0	0.0126579	0	0.0156244	0.0140182	0.00659336	0.0134044	0.00931664	0.00269179	0.00414077	0.01023	0.0102039	0.00558656	0.00878282	0	0.01157	0.00806443	0.00916367	0	0
1700027A07Rik	0	0	0.0126579	0	0.00520831	0.00467288	0.00659336	0.0160851	0.00310559	0.00269179	0.00207039	0.00255754	0.00765299	0.00558656	0.00376411	0.00469482	0.00495866	0.00604835	0.00801824	0.0108301	0.0154236
1700028K03Rik	0.042241	0	0	0.0208318	0.0104165	0.0327045	0.00659336	0.0214461	0.0248422	0.033641	0.0248422	0.01023	0.0153055	0.0223445	0.0213284	0.0187782	0.00826437	0.00403225	0.0217623	0.0036101	0.00771201
1700028P14Rik	0	0	0	0.0624594	0.0676567	0.00934566	0.0614997	0.085686	0.00621114	0.0322959	0.0186325	0.00511507	0	0.011173	0	0.00469482	0.00495866	0.00201613	0.00229095	0.00722015	0
1700029I15Rik	0.0281653	0.0232537	0.0126579	0.0208318	0.0104165	0.0140182	0.0219763	0.0107237	0.00931664	0.00672942	0.0186325	0.0127874	0.0102039	0.016759	0.017565	0.00469482	0.01157	0.0120965	0.0114545	0.0252681	0.0154236
1700029J07Rik	0.042241	0	0.0379656	0.0416546	0.0416546	0.046712	0.0505279	0.0562706	0.0372585	0.0591848	0.0971556	0.0842991	0.0433538	0.0502582	0.0689541	0.0281653	0.039659	0.0544086	0.0343575	0.0036101	0.0334128
1700030J22Rik	0.0281653	0	0.0506113	0.0208318	0.0780457	0.0280337	0.120587	0.085686	0.0310509	0.0605283	0.0620719	0.035798	0.0127548	0.0614139	0.0388861	0.0563083	0.0446133	0.0241912	0.045803	0.0288769	0.0308434
1700030K09Rik	0.042241	0.0232537	0.0506113	0.0208318	0.0676567	0.0886688	0.072464	0.0696488	0.0558715	0.0793246	0.0600054	0.0587897	0.0586399	0.066989	0.0626942	0.042241	0.077608	0.0845766	0.0480914	0.0360932	0.0616576
1700034H15Rik	0	0.0232537	0.0126579	0	0.0208318	0.00467288	0.00439559	0.0107237	0.00310559	0.00672942	0.00621114	0.0127874	0.0102039	0.0279293	0.0125467	0.00938953	0.01157	0.00604835	0.00801824	0.0108301	0.00514137
1700037C18Rik	0.0703645	0	0.0758765	0.145321	0.135006	0.125836	0.103114	0.20762	0.0744653	0.1195	0.164883	0.145269	0.0891675	0.0892669	0.117671	0.0937593	0.102301	0.080558	0.0789557	0.0252681	0.133281
1700037H04Rik	0.291624	0.320088	0.798481	0.851602	1.03451	0.735585	1.07778	1.04214	0.836765	0.914294	1.07352	1.00248	0.973822	0.779092	0.89286	0.844381	1.09795	0.832063	0.922871	0.750608	0.783625
1700040D17Rik	0	0	0.0253138	0.0208318	0.00520831	0.00467288	0.015384	0.00804281	0.00621114	0.0121128	0.0186325	0.0255727	0.0127548	0.016759	0.017565	0.014084	0.00661152	0.00604835	0.0125999	0.00722015	0.0154236
1700041G16Rik	0.042241	0	0.0253138	0.0208318	0.00520831	0.00467288	0.0131864	0.0053619	0.012422	0.00942113	0.012422	0.0204589	0.00255102	0	0.00627348	0.00938953	0.00495866	0.00403225	0.00801824	0.0036101	0
1700047M11Rik	0.0281653	0.0232537	0.0253138	0.103979	0.0416546	0.0373745	0.0680793	0.0402036	0.0310509	0.0215327	0.0455329	0.035798	0.0153055	0.0446779	0.0376323	0.0750469	0.039659	0.0403117	0.0412254	0.158184	0.0231342
1700048O20Rik	0.154316	0	0.0758765	0.0624594	0.114334	0.144358	0.0658864	0.072323	0.114655	0.0739568	0.0868473	0.074101	0.0789994	0.10039	0.120162	0.0797277	0.0874916	0.0865853	0.0960721	0.05052	0.0898533
1700052K11Rik	0.0703645	0.0928896	0.0884921	0.103979	0.0468579	0.0793559	0.0834197	0.101701	0.071368	0.0954137	0.0909718	0.0638951	0.0840846	0.0558369	0.0814657	0.126424	0.0924303	0.0523954	0.0663888	0.021659	0.0513913
1700055D18Rik	0	0	0.0126579	0	0.0260387	0.0186905	0.015384	0.0160851	0.00931664	0.0174957	0.0144922	0.0153447	0.0102039	0.00558656	0.0125467	0.014084	0.0165282	0.00604835	0.0137453	0.00722015	0.0205641
1700056E22Rik	0.0281653	0.0464949	0.0126579	0.0416546	0.0156244	0.0140182	0.00659336	0.0134044	0.00931664	0.00807528	0.00621114	0.00511507	0.00765299	0	0.0100375	0.00469482	0.00661152	0.00403225	0.0068728	0	0.0179939
1700058P15Rik	0	0.069711	0	0	0	0	0.0021978	0.00268096	0.00621114	0.00403767	0.00207039	0	0.00765299	0.00558656	0.0012547	0.00469482	0	0.00403225	0	0.00722015	0.00257069
1700063D05Rik	0.0563083	0.0928896	0.138794	0.347152	0.0156244	0.153601	0.0351576	0.0268064	0.058972	0.02826	0.205588	0.104668	0.056093	0.166823	0.0326166	0.023472	0.0380074	0.0483682	0.0217623	0.05052	0.0282739
1700064M15Rik	0	0	0	0	0.0208318	0.00467288	0.0087911	0.0268064	0.012422	0.00807528	0.0144922	0.0153447	0.0102039	0	0.0150559	0.00938953	0.00826437	0.00403225	0.00572735	0	0.00771201
1700065D16Rik	0	0	0.0253138	0.0208318	0.0104165	0.0140182	0.00659336	0.0134044	0.00931664	0.00807528	0.0186325	0.00767256	0.00765299	0.00558656	0.0250915	0.0187782	0.01157	0.00604835	0.0125999	0.0108301	0.00514137
1700066B19Rik	0	0.253103	0.0126579	0.0208318	0.0208318	0.0186905	0.0219763	0.032166	0.00931664	0.033641	0.0186325	0.01023	0.0280575	0.0279293	0.0827162	0.0375499	0.0726633	0.0302373	0.0309229	0.0180496	0.0411195
1700066M21Rik	0.042241	0	0.0506113	0.0208318	0.140166	0.0933224	0.0856097	0.0509163	0.0744653	0.0887127	0.0765298	0.0944885	0.0509983	0.066989	0.0789643	0.0703645	0.103945	0.0503819	0.0560989	0.0397008	0.0975317
1700084E18Rik	0	0.0232537	0	0.0208318	0.0312449	0	0.0087911	0.0107237	0.012422	0.01615	0.0144922	0.0179019	0.00510202	0.016759	0.0112921	0.00469482	0.00330578	0.0161283	0.0148906	0.0036101	0.00771201
1700086O06Rik	0.0281653	0.0928896	0.063249	0.206855	0.155621	0.0933224	0.146726	0.0910271	0.102306	0.0940738	0.123906	0.0766513	0.117079	0.105947	0.208032	0.163589	0.172694	0.110661	0.100632	0.0433078	0.0565252
1700086P04Rik	0.0281653	0	0.0506113	0	0.00520831	0.0233624	0.0131864	0.0241263	0.0217374	0.010767	0.0186325	0.0179019	0.0204067	0.011173	0.0150559	0.00938953	0.0148755	0.0201599	0.0217623	0	0.0102826
1700088E04Rik	0.0281653	0.0232537	0.0379656	0.0416546	0.181297	0.046712	0.0921771	0.162819	0.0806579	0.1195	0.144425	0.140205	0.038256	0	0.102705	0.0703645	0.0858449	0.0443403	0.0686745	0.0252681	0.0539584
1700095J03Rik	0	0	0.0126579	0.0208318	0.0312449	0.0140182	0.0175815	0.0402036	0.0279467	0.02826	0.00828148	0.00255754	0	0.00558656	0.00250941	0.00469482	0.00495866	0	0.00916367	0.0036101	0.00514137
1700096K18Rik	0.014084	0.069711	0.0126579	0.0832372	0.0676567	0.0793559	0.0702718	0.085686	0.0868473	0.0363312	0.0682699	0.0792011	0.0611863	0.0446779	0.0564318	0.0703645	0.0528679	0.0785482	0.0663888	0.0397008	0.0693531
1700102H20Rik	0.014084	0	0	0	0.00520831	0.00934566	0	0.00268096	0.00931664	0.00672942	0	0.01023	0.0102039	0.00558656	0.0100375	0	0.01157	0.00806443	0.0125999	0	0.00257069
1700105P06Rik	0	0.0232537	0.0126579	0	0.0208318	0.0186905	0.0175815	0.0160851	0.0217374	0.0134585	0.0269119	0.0153447	0.0153055	0.00558656	0.0263458	0.00469482	0.01157	0.0100805	0.0125999	0.0036101	0.0154236
1700112D23Rik	0.0281653	0	0	0.0208318	0.0104165	0.0140182	0.015384	0.0294863	0.012422	0.01615	0.0186325	0.0230159	0.0178562	0.0279293	0.0338706	0.023472	0.0313998	0.0100805	0.00572735	0.00722015	0.0257041
1700112J16Rik	0.014084	0	0.0758765	0.0416546	0.0520598	0.046712	0.0505279	0.0749967	0.0527705	0.0484333	0.049669	0.0409093	0.0484504	0.0446779	0.0464074	0.060995	0.0660676	0.0322525	0.045803	0.0144399	0.0565252
1700113A16Rik	0.014084	0	0.0379656	0.0416546	0.0208318	0.0186905	0.0417461	0.0402036	0.0310509	0.0484333	0.0393273	0.033242	0.0204067	0.0223445	0.0263458	0.0375499	0.0413106	0.0221756	0.0171813	0.0252681	0.0154236
1700123O20Rik	0.154316	0.18499	0.225921	0.227207	0.342238	0.240661	0.296725	0.252016	0.326468	0.26603	0.291903	0.228193	0.284415	0.302622	0.405369	0.259972	0.309104	0.241595	0.210358	0.22552	0.191627
1700124L16Rik	0.0281653	0	0.0758765	0.206855	0.135006	0.0933224	0.133668	0.0562706	0.108483	0.142185	0.113627	0.137672	0.144901	0.194306	0.133853	0.126424	0.12037	0.100636	0.122261	0.0360932	0.128183
1700125H20Rik	0	0	0.0253138	0	0	0	0.0021978	0.0053619	0.00621114	0	0.00207039	0.00511507	0.00765299	0.00558656	0.00250941	0	0.0181808	0.00806443	0.00343642	0.0144399	0.0565252
1810009A15Rik	0	0	0.0379656	0.0624594	0.0728522	0.0420437	0.0461375	0.0535936	0.058972	0.0403659	0.0351894	0.0460196	0.0509983	0.0502582	0.0601895	0.0563083	0.0561688	0.0523954	0.0400809	0.0144399	0.0282739
1810010H24Rik	0.042241	0	0.163823	0.0832372	0.0572604	0.0840133	0.0834197	0.0616232	0.108483	0.0940738	0.0538043	0.0613426	0.114545	0.0837011	0.103953	0.135733	0.0907843	0.0966238	0.10519	0.147479	0.148553
1810013L24Rik	0.0844068	0.0232537	0.163823	0.227207	0.227207	0.208761	0.275618	0.27791	0.163862	0.215028	0.225819	0.2257	0.254884	0.286565	0.315923	0.195927	0.214872	0.158608	0.156293	0.13318	0.148553
1810021B22Rik	0.0281653	0	0.0126579	0.0624594	0.0416546	0.0186905	0.0263706	0.0455606	0.00931664	0.0349861	0.0248422	0.0281293	0.0229572	0.0279293	0.0363784	0.042241	0.0380074	0.0161283	0.0194719	0.0108301	0.0102826
1810022K09Rik	0.250881	0.572809	0.907972	0.836482	0.832677	0.70618	0.8999	0.940755	0.898833	0.798124	0.862213	0.846592	0.766955	0.816736	0.942135	0.781754	0.868458	0.82763	0.793721	0.69098	0.771923
1810024B03Rik	0	0	0.0379656	0.0208318	0.0156244	0.0186905	0.00659336	0.0160851	0.0186325	0.00942113	0.00621114	0.0127874	0.00765299	0.00558656	0.0138013	0.023472	0.021486	0.0120965	0.00458189	0.0036101	0.0179939
1810030O07Rik	0.126424	0.0464949	0.113679	0.247466	0.176171	0.0793559	0.1706	0.130992	0.15773	0.116827	0.13212	0.124994	0.0866263	0.122598	0.137583	0.191319	0.123652	0.0845766	0.11316	0.0793391	0.0872927
1810032O08Rik	0.0703645	0.18499	0.101094	0.186418	0.0312449	0.107271	0.0812293	0.0883568	0.077562	0.083349	0.0950947	0.107211	0.0764561	0.10039	0.112685	0.089084	0.0891381	0.0644715	0.0595296	0.0324853	0.0847315
1810037I17Rik	1.51676	1.17526	1.27289	1.41533	1.57732	1.57363	1.45245	1.54333	1.38227	1.50795	1.67718	1.64485	1.5978	1.62734	1.57671	1.42458	1.45394	1.42086	1.42868	1.44364	1.41923
1810041H14Rik	0	0	0.0506113	0.0208318	0.00520831	0.0186905	0.015384	0.0241263	0.0186325	0.0121128	0.0227724	0.0153447	0.00255102	0.011173	0.0238371	0.0281653	0.0347038	0.0141124	0.0194719	0.00722015	0.0154236
1810041L15Rik	0.487502	0.16208	0.213563	0.499768	0.646683	0.144358	0.303033	0.539177	0.302805	0.483017	0.478432	0.245605	0.13985	0.117051	0.226417	0.0656805	0.0924303	0.176502	0.202508	0.32288	0.158716
1810043G02Rik	0.39787	0.592607	0.542601	0.499768	0.642396	0.426229	0.559379	0.652447	0.549557	0.541164	0.586849	0.663736	0.469774	0.51837	0.639356	0.720155	0.682868	0.610548	0.556212	0.253591	0.525593
1810044D09Rik	0.014084	0.0464949	0.0126579	0.0208318	0.0468579	0.0280337	0.0219763	0.032166	0.0341548	0.0134585	0.0517368	0.0255727	0.0204067	0.0223445	0.0413934	0.0328579	0.0247908	0.0141124	0.016036	0.0144399	0.0128531
1810055G02Rik	0.140384	0.0232537	0.063249	0.103979	0.0260387	0.0793559	0.0219763	0.0241263	0.049669	0.0296054	0.0393273	0.0281293	0.0229572	0.0223445	0.0476607	0.0516203	0.0462645	0.0241912	0.0412254	0.0685384	0.0334128
1810058I24Rik	0.223487	0.491588	0.55357	0.347152	0.540939	0.575225	0.565052	0.717101	0.489529	0.542334	0.520667	0.560914	0.449042	0.493669	0.618521	0.512482	0.599755	0.555642	0.415227	0.473125	0.452288
1810062O18Rik	0.0703645	0.0928896	0.0126579	0	0.0104165	0.00934566	0.0307644	0.0134044	0.0217374	0.0215327	0.0248422	0.0153447	0.0127548	0.00558656	0.0301084	0.00469482	0.021486	0.0120965	0.00916367	0.0144399	0.00257069
2010005H15Rik	0	0	0	0	0.150473	0.00467288	0.1053	0.00804281	0.00931664	0.0121128	0.00621114	0	0.0840846	0	0.00627348	0.00469482	0.0743118	0.0382971	0.00343642	0.0144399	0.0282739
2010015M23Rik	0.0281653	0.139086	0.0253138	0.0208318	0.0676567	0.0373745	0.0680793	0.0776699	0.0527705	0.0524658	0.0579386	0.0689989	0.0815423	0.0502582	0.0789643	0.0656805	0.0495665	0.0745278	0.0538114	0.0577297	0.046256
2010107E04Rik	2.24389	1.96252	1.96398	2.0743	1.78158	2.05308	1.91468	1.91787	1.97675	1.82945	1.76404	1.79638	2.00963	1.98924	1.74066	1.99057	1.96231	1.90998	1.99871	2.12406	1.97451
2010109A12Rik	0.042241	0	0.0884921	0.103979	0.0728522	0.0793559	0.0505279	0.0455606	0.071368	0.0457445	0.0538043	0.0562363	0.0484504	0.0948299	0.0664505	0.0844068	0.0413106	0.0503819	0.0480914	0.0577297	0.0513913
2010111I01Rik	0.291624	1.5335	0.213563	0.186418	0.129843	0.276825	0.192221	0.154876	0.188326	0.215028	0.177126	0.130068	0.217665	0.371298	0.265381	0.209727	0.167806	0.166567	0.174373	0.380634	0.138375
2010300C02Rik	0	0	0.1763	0.247466	0.242411	0.0560454	0.185743	0.144271	0.163862	0.0967534	0.0827214	0.175567	0.071368	0.0614139	0.107696	0.126424	0.0743118	0.120675	0.0880876	0.0397008	0.0898533
2010308F09Rik	0.0563083	0	0	0	0.00520831	0.00467288	0.0021978	0.00804281	0.00931664	0.00672942	0	0.00767256	0.00255102	0	0.0100375	0.00938953	0.00661152	0.00403225	0.00572735	0	0.00514137
2010315B03Rik	0.014084	0.16208	0.101094	0.0208318	0.109158	0.0700362	0.0768474	0.112364	0.0744653	0.0591848	0.11157	0.114837	0.13985	0.10039	0.110191	0.103104	0.094076	0.0825674	0.0721025	0.0577297	0.0975317
2010320M18Rik	0.209727	0.0928896	0.225921	0.366725	0.272651	0.199606	0.309329	0.377061	0.215714	0.220287	0.205588	0.173048	0.291761	0.20526	0.276271	0.163589	0.200311	0.19236	0.146101	0.136757	0.140921
2210008F06Rik	0.0281653	0	0.0253138	0.0416546	0.0156244	0.0233624	0.0658864	0.0375247	0.0372585	0.0443999	0.0269119	0.0281293	0.038256	0.0279293	0.048914	0.0469311	0.0264432	0.0241912	0.016036	0.0288769	0.0102826
2210011C24Rik	0	0.230511	0.0884921	0.0832372	0.0780457	0.0746969	0.0571118	0.0482387	0.077562	0.0511217	0.0538043	0.0306857	0.0535458	0.0335133	0.0263458	0.023472	0.0148755	0.0221756	0.0526675	0.100912	0.0334128
2210016F16Rik	0.291624	0.116019	0.225921	0.227207	0.317553	0.195023	0.340627	0.334225	0.272994	0.327876	0.313672	0.208211	0.190178	0.17233	0.195736	0.191319	0.17595	0.174516	0.212599	0.18664	0.221827
2210016L21Rik	1.41815	1.21396	1.65892	1.52448	1.58758	1.44572	1.49079	1.47205	1.64954	1.52094	1.58349	1.60806	1.55944	1.61672	1.51587	1.51085	1.74205	1.69196	1.63159	1.52607	1.6806
2210406O10Rik	0	0	0.0506113	0.0416546	0.0468579	0.0607104	0.0505279	0.0990337	0.0558715	0.0390211	0.0703354	0.0766513	0.0204067	0.066989	0.0839665	0.042241	0.061119	0.0483682	0.0549552	0.0360932	0.035982
2210408I21Rik	0.0281653	0.0232537	0.0884921	0.0832372	0.0987975	0.0700362	0.0899884	0.0963655	0.0899408	0.0645581	0.0909718	0.0587897	0.0815423	0.0335133	0.0802151	0.0563083	0.0743118	0.0423261	0.0949318	0.05052	0.046256
2300009A05Rik	0.632941	0.407253	0.531572	0.742399	0.629474	0.602978	0.60615	0.672104	0.659269	0.578265	0.565627	0.477778	0.557417	0.714241	0.471652	0.520744	0.420551	0.396766	0.526333	0.460126	0.622291
2310001H17Rik	0.0563083	0	0.0253138	0	0.0156244	0	0.0702718	0.0616232	0	0.126179	0	0.00511507	0.00510202	0.0502582	0.00752816	0	0.00330578	0.0141124	0.00114548	0	0.00257069
2310003N18Rik	0	0	0	0	0.0104165	0.0233624	0.0087911	0.00804281	0.00621114	0.00807528	0.0103518	0.00255754	0.00255102	0	0.0012547	0	0.00495866	0.00403225	0.00229095	0	0.00514137
2310009B15Rik	0.462236	0.18499	0.49813	1.18315	1.00122	1.03144	1.16577	1.10929	1.05822	1.19663	0.98567	0.902909	0.469774	0.590736	0.518488	0.432408	0.616414	0.43752	0.548287	0.518034	0.459263
2310011J03Rik	0.0844068	0.275569	0.201172	0.186418	0.247466	0.272323	0.273501	0.246816	0.22178	0.239952	0.255994	0.235664	0.235074	0.259643	0.250813	0.13108	0.214872	0.239635	0.221551	0.190187	0.184049
2310022A10Rik	0.209727	0.069711	0.113679	0.186418	0.247466	0.204186	0.207303	0.215487	0.233887	0.186005	0.2238	0.228193	0.154991	0.150272	0.187112	0.149675	0.158019	0.154625	0.157425	0.0757398	0.178991
2310022B05Rik	0.112439	0.069711	0.0758765	0.0416546	0.0468579	0.0560454	0.0527228	0.0803425	0.0651712	0.063215	0.0600054	0.0868473	0.0840846	0.0614139	0.0727088	0.0750469	0.061119	0.0564217	0.0480914	0.165311	0.0308434
2310030G06Rik	0.0984325	0.0232537	0	0.0416546	0.103979	0.00934566	0.0614997	0.072323	0.0620719	0.0672441	0.0207025	0.00767256	0.0280575	0.072562	0.017565	0.014084	0.0165282	0.0423261	0.0137453	0.0144399	0.00771201
2310033P09Rik	0.423818	0.116019	0.486866	0.536404	0.758486	0.510276	0.530769	0.536842	0.525208	0.486622	0.536968	0.507363	0.462884	0.41276	0.567533	0.601555	0.553172	0.450348	0.448708	0.291867	0.452288
2310034G01Rik	0.042241	0.0464949	0.0126579	0.0624594	0.0676567	0.0420437	0.0461375	0.0348455	0.046567	0.0309506	0.0372585	0.0434646	0.0535458	0.0390962	0.0476607	0.0563083	0.0264432	0.0362824	0.0492355	0.0360932	0.0205641
2310034O05Rik	0	0	0	0	0.0208318	0	0.0175815	0.0134044	0.0155273	0.00134589	0.0144922	0	0	0.0223445	0.00250941	0	0.00165289	0.00403225	0.00572735	0.00722015	0.00257069
2310035C23Rik	0.39787	0.428616	0.394732	0.462501	0.415063	0.409057	0.566939	0.580742	0.475649	0.474581	0.518848	0.480068	0.376263	0.488694	0.556738	0.508339	0.551743	0.441192	0.395135	0.370525	0.350129
2310039H08Rik	0.126424	0.0464949	0.213563	0.227207	0.262597	0.0933224	0.181421	0.262394	0.215714	0.171434	0.183238	0.200696	0.144901	0.105947	0.163635	0.158954	0.156387	0.154625	0.175501	0.161749	0.125633
2310040G07Rik	0	0.069711	0.0379656	0	0.0260387	0	0.0241735	0.0160851	0.00621114	0.00403767	0.0103518	0	0.00765299	0.0223445	0.0363784	0.014084	0.0247908	0.0141124	0.00229095	0.00722015	0.00771201
2310040G24Rik	0	0	0.101094	0.0832372	0.0676567	0.0560454	0.0965532	0.149576	0.099216	0.0457445	0.130068	0.107211	0.0688232	0.117051	0.0225828	0.023472	0.0264432	0.0322525	0.0480914	0.0937255	0.0488238
2310047D07Rik	0	0	0.0379656	0.0208318	0.0260387	0.0140182	0.0087911	0.00804281	0.00931664	0.010767	0.012422	0.00511507	0.00255102	0	0.00376411	0.00938953	0.00826437	0.00201613	0.0068728	0.0036101	0.0179939
2310057M21Rik	0.154316	0.0232537	0.126247	0.206855	0.201753	0.236118	0.241599	0.290791	0.176107	0.213713	0.175087	0.180602	0.187672	0.2434	0.22764	0.186707	0.210023	0.19038	0.157425	0.136757	0.148553
2310061I04Rik	0.462236	0.512193	0.394732	0.758486	0.504382	0.555154	0.501757	0.527476	0.570954	0.508132	0.370357	0.400936	0.541955	0.513453	0.540433	0.500028	0.530182	0.417225	0.449747	0.41406	0.514301
2310068J16Rik	0.0281653	0.0928896	0.0506113	0.0416546	0.0468579	0.0420437	0.0439419	0.0803425	0.0527705	0.0403659	0.0600054	0.0306857	0.0484504	0.0279293	0.0476607	0.0469311	0.0247908	0.0423261	0.0274879	0.0180496	0.0154236
2310074N15Rik	0.0281653	0.0464949	0.0506113	0.103979	0.0728522	0.0886688	0.0439419	0.0509163	0.0558715	0.0511217	0.0579386	0.0409093	0.038256	0.0781328	0.058937	0.0656805	0.0479155	0.0483682	0.036647	0.0252681	0.0513913
2410002F23Rik	0.35847	0.275569	0.464165	0.366725	0.438898	0.312639	0.426511	0.475209	0.45045	0.429475	0.463551	0.493758	0.35955	0.381723	0.443304	0.367274	0.374645	0.409804	0.331794	0.257086	0.306245
2410004B18Rik	0.39787	0.275569	0.628652	0.65948	0.612097	0.634194	0.646353	0.652447	0.669377	0.606761	0.741696	0.68031	0.632911	0.547633	0.738926	0.636826	0.661446	0.600374	0.560162	0.524373	0.536824
2410004I01Rik	0	0	0.0506113	0	0.0572604	0.0140182	0.0636932	0.0455606	0.169988	0.0296054	0.0372585	0.01023	0.0127548	0.0223445	0.0388861	0.00469482	0.0198334	0.0100805	0.0355023	0.0144399	0.00771201
2410004P03Rik	0	0	0	0	0.150473	0	0.0680793	0.00804281	0.012422	0.00942113	0.0331202	0.00511507	0	0	0.00250941	0	0.00330578	0.0141124	0.00229095	0	0.00514137
2410015M20Rik	1.81398	1.36837	1.33684	1.9189	2.01872	1.68139	1.96118	1.9683	1.85417	1.91864	1.78789	1.84243	1.87192	1.58861	1.73767	1.5148	1.75045	1.79198	1.73481	1.59855	1.78542
2410018L13Rik	0	0.116019	0.126247	0.0624594	0.119507	0.0933224	0.0965532	0.0696488	0.11157	0.0591848	0.0703354	0.0511286	0.056093	0.0446779	0.0977114	0.0563083	0.0627687	0.0463544	0.0994921	0.0360932	0.0924134
2410080I02Rik	0.042241	0	0.0126579	0	0.0312449	0.0280337	0.0241735	0.0187657	0.0372585	0.0242237	0.0331202	0.0204589	0.0331572	0.00558656	0.0250915	0.023472	0.0462645	0.0221756	0.0206171	0.0180496	0.0231342
2410089E03Rik	0.436692	0.612199	0.464165	0.554481	0.625145	0.468638	0.542262	0.501501	0.464484	0.476995	0.536968	0.493758	0.366725	0.478712	0.461487	0.524863	0.459673	0.481212	0.451823	0.22552	0.480062
2410131K14Rik	0.16822	0.069711	0.101094	0.247466	0.206855	0.172047	0.218048	0.264985	0.176107	0.171434	0.251983	0.19317	0.222646	0.17233	0.278687	0.255429	0.174322	0.1884	0.1495	0.143907	0.168862
2510002D24Rik	0.474904	0.470787	0.596841	0.625145	0.415063	0.522612	0.540351	0.607962	0.533357	0.544672	0.474721	0.527608	0.501652	0.674044	0.697408	0.589646	0.584353	0.607163	0.496018	0.41406	0.484658
2510009E07Rik	0.154316	0.2979	0.126247	0.347152	0.140166	0.185844	0.183582	0.236398	0.099216	0.222914	0.227837	0.39146	0.192683	0.210727	0.225193	0.195927	0.187332	0.116671	0.132487	0.0973192	0.158716
2510017J16Rik	0.0703645	0	0.0253138	0.0208318	0.0104165	0.0327045	0.0241735	0.0187657	0.0155273	0.0255692	0.0144922	0.01023	0.0127548	0.0279293	0.017565	0.014084	0.00991719	0.0201599	0.0125999	0.0108301	0.0128531
2510039O18Rik	0.0281653	0.0232537	0.0884921	0.0832372	0.114334	0.0746969	0.0812293	0.0910271	0.0899408	0.0927338	0.099216	0.0817503	0.0637324	0.117051	0.128878	0.0563083	0.0858449	0.0785482	0.0755295	0.0360932	0.0667884
2510046G10Rik	0.042241	0.069711	0.0506113	0.0416546	0.0260387	0.0607104	0.0483328	0.0428823	0.0434646	0.02826	0.0455329	0.035798	0.056093	0.0446779	0.0326166	0.0375499	0.0313998	0.0161283	0.0309229	0.0469142	0.0334128
2600006K01Rik	0.014084	0.0232537	0.0506113	0.0208318	0.0832372	0.0513793	0.0527228	0.0562706	0.0682699	0.0752989	0.11774	0.0664473	0.0306075	0.0892669	0.058937	0.0375499	0.0825508	0.0604471	0.0572425	0.0288769	0.0513913
2610001J05Rik	0.632941	0.512193	0.628652	0.676397	0.96706	0.775149	0.609842	0.685085	0.832228	0.736447	0.910352	0.897556	1.08682	1.03091	1.16267	0.809913	1.06986	0.812758	0.642219	0.871126	0.68128
2610002M06Rik	0.195927	0.16208	0.299308	0.405465	0.337317	0.299252	0.319796	0.387047	0.29091	0.27382	0.323519	0.257998	0.303971	0.265042	0.285925	0.354059	0.30279	0.233753	0.253851	0.115268	0.221827
2610008E11Rik	0.16822	0.116019	0.101094	0.145321	0.114334	0.0933224	0.0987406	0.0963655	0.077562	0.0726145	0.101276	0.0995796	0.0535458	0.0837011	0.103953	0.089084	0.077608	0.0825674	0.0812394	0.0324853	0.0436879
2610020C07Rik	0.0281653	0	0.0253138	0	0.0416546	0.046712	0.0087911	0.0348455	0.0403617	0.0322959	0.0186325	0.0485742	0.0433538	0.0837011	0.0413934	0.023472	0.0446133	0.0302373	0.0343575	0.0469142	0.0257041
2610021A01Rik	0	0	0.0253138	0.0832372	0.0624594	0.046712	0.0549174	0.0348455	0.046567	0.0497776	0.0372585	0.035798	0.0509983	0.066989	0.048914	0.0375499	0.0380074	0.0403117	0.0400809	0.05052	0.0693531
2610027F03Rik	0	0	0.0253138	0	0.00520831	0	0.0021978	0	0	0.00134589	0	0.00511507	0.00255102	0	0.00250941	0	0.0165282	0.0161283	0.0103091	0.0036101	0.0385509
2610028E06Rik	0	0	0	0	0.00520831	0.00467288	0.0461375	0.0402036	0.00310559	0.010767	0.00828148	0.00255754	0.0586399	0.0948299	0.230085	0.0328579	0.179205	0.0885937	0.00916367	0.021659	0.0154236
2610035D17Rik	0.112439	0.116019	0.49813	0.227207	0.30265	0.325972	0.277734	0.194482	0.209641	0.21108	0.293888	0.307167	0.361943	0.302622	0.350378	0.354059	0.370011	0.307625	0.314383	0.267555	0.266748
2610037D02Rik	0.182091	0.116019	0.113679	0.227207	0.140166	0.17665	0.116222	0.0883568	0.154662	0.131518	0.152616	0.119917	0.0967876	0.139215	0.171059	0.126424	0.149852	0.112665	0.116574	0.0793391	0.117978
2610042L04Rik	0.0281653	0	0	0.0208318	0.0104165	0.0140182	0.0197789	0.0053619	0.0186325	0.01615	0.0165624	0.0868473	0.00510202	0.0335133	0.00376411	0.014084	0.00826437	0.00604835	0.00916367	0.0180496	0.0102826
2610044O15Rik8	0.014084	0.069711	0.1763	0.103979	0.201753	0.144358	0.190062	0.13365	0.145449	0.108803	0.13212	0.140205	0.109475	0.13368	0.138826	0.089084	0.136763	0.136671	0.130216	0.0613334	0.138375
2610301B20Rik	0.278092	0.207804	0.250535	0.307625	0.563458	0.267815	0.57259	0.616947	0.254992	0.428244	0.448573	0.48464	0.272139	0.366071	0.430723	0.31853	0.461165	0.29799	0.3122	0.147479	0.246843
2610318N02Rik	0.154316	0	0	0.103979	0.0312449	0.00934566	0.0263706	0.0160851	0.0217374	0.0201871	0.00621114	0	0.0688232	0.0335133	0.0012547	0	0.00330578	0.00201613	0.00114548	0.0108301	0.0154236
2610507B11Rik	0.140384	0.320088	0.486866	0.554481	0.476549	0.468638	0.49004	0.61246	0.48676	0.550505	0.389651	0.408021	0.395241	0.443426	0.40421	0.419511	0.345171	0.349685	0.406786	0.277994	0.381429
2610524H06Rik	0.223487	0.275569	0.188751	0.424624	0.499768	0.383085	0.472348	0.401957	0.433499	0.398519	0.429717	0.338752	0.352357	0.41276	0.489613	0.380428	0.498148	0.383663	0.398318	0.260579	0.335569
2700016F22Rik	0	0	0.0253138	0	0.0260387	0.00934566	0.015384	0.0214461	0	0.0201871	0.0165624	0.0179019	0.0102039	0	0.0150559	0.014084	0.0132228	0.0120965	0.0137453	0.0144399	0.00771201
2700033N17Rik	0	0	0	0.0416546	0.0728522	0.0560454	0.0877992	0.0428823	0.0930334	0.0659011	0.13212	0.0511286	0.00255102	0	0.00250941	0.00469482	0.00330578	0.00604835	0.00343642	0.0288769	0.00257069
2700038G22Rik	0.042241	0	0.063249	0.0208318	0.0572604	0.0746969	0.0351576	0.0509163	0.071368	0.0645581	0.0847845	0.0868473	0.0280575	0.0446779	0.0802151	0.0469311	0.0990117	0.0564217	0.0663888	0.0577297	0.0385509
2700046A07Rik	0	0.0464949	0	0	0.00520831	0.0186905	0.0087911	0	0.012422	0.0134585	0.00414077	0.00255754	0.00255102	0.011173	0.0100375	0.00938953	0.00826437	0.00201613	0.0125999	0.021659	0.00771201
2700046G09Rik	0.0281653	0	0.0506113	0	0.124677	0.0607104	0.1053	0.0990337	0.0620719	0.0846901	0.099216	0.0689989	0.0891675	0.0614139	0.117671	0.089084	0.0594691	0.0644715	0.0503796	0.0541252	0.046256
2700049A03Rik	0.0844068	0	0.0884921	0.0832372	0.0728522	0.0560454	0.0790386	0.0696488	0.071368	0.0538098	0.0682699	0.0664473	0.0688232	0.0390962	0.0639464	0.0469311	0.07596	0.0382971	0.045803	0.0757398	0.0308434
2700062C07Rik	0.0844068	0.16208	0.250535	0.206855	0.242411	0.199606	0.228769	0.262394	0.261002	0.201857	0.237915	0.248087	0.200191	0.291925	0.289539	0.278092	0.256676	0.221963	0.210358	0.197274	0.199194
2700069I18Rik	0	0	0	0	0.00520831	0.0513793	0.0351576	0.0455606	0.0930334	0.0417107	0.012422	0.00255754	0.127208	0.199786	0.0338706	0.0187782	0.077608	0.168556	0.028633	0.021659	0.0308434
2700081O15Rik	0.0844068	0.0928896	0.0884921	0.0832372	0.0780457	0.046712	0.114038	0.152226	0.114655	0.0860311	0.0641382	0.035798	0.101865	0.066989	0.0288542	0.023472	0.0693658	0.0624594	0.0480914	0.0360932	0.0949728
2700097O09Rik	0.35847	0.253103	0.213563	0.287682	0.222127	0.199606	0.211604	0.225954	0.206602	0.215028	0.249976	0.235664	0.202691	0.291925	0.297956	0.191319	0.245462	0.272813	0.243853	0.165311	0.201714
2810001G20Rik	0.384799	0.16208	0.359307	0.499768	0.655225	0.551114	0.497858	0.534505	0.522485	0.472165	0.579801	0.360432	0.524139	0.483709	0.528392	0.428116	0.397698	0.493799	0.595358	0.271038	0.47776
2810004N23Rik	0.371666	0.342124	0.394732	0.307625	0.782309	0.464431	0.613526	0.750571	0.731213	0.618039	0.588607	0.529846	0.521901	0.453562	0.641427	0.48331	0.570242	0.6324	0.451823	0.284937	0.449958
2810006K23Rik	0.112439	0	0.126247	0.165905	0.165905	0.130471	0.1402	0.109699	0.130068	0.087372	0.148522	0.122456	0.170097	0.194306	0.135097	0.121765	0.118729	0.108657	0.10519	0.0973192	0.0821697
2810021J22Rik	0.042241	0	0.0379656	0.103979	0.0468579	0.065374	0.0680793	0.066974	0.0341548	0.0551537	0.041396	0.0383538	0.0535458	0.0502582	0.0539262	0.0797277	0.0446133	0.0544086	0.0400809	0.0288769	0.0616576
2810032G03Rik	0	0	0.0379656	0.0208318	0.0416546	0.0327045	0.0505279	0.0696488	0.046567	0.0752989	0.0517368	0.0562363	0.119613	0.13368	0.106449	0.0797277	0.0891381	0.0584345	0.0469472	0.0360932	0.046256
2810049E08Rik	0.014084	0	0.0379656	0.0624594	0.0208318	0.0186905	0.0131864	0.0187657	0.00931664	0.01615	0.0269119	0.0179019	0.0102039	0.016759	0.0050188	0.00469482	0.00495866	0.0120965	0.0240527	0	0.0257041
2810402E24Rik	0.0984325	0.16208	0.0758765	0.0208318	0.119507	0.065374	0.114038	0.141617	0.0930334	0.104788	0.0950947	0.147799	0.0611863	0.0837011	0.0977114	0.0844068	0.0644182	0.106653	0.0789557	0.0541252	0.0821697
2810403A07Rik	0.0984325	0.512193	0.311399	0.32745	0.227207	0.258784	0.267141	0.28049	0.261002	0.259526	0.219759	0.210713	0.235074	0.302622	0.23375	0.232638	0.242252	0.204223	0.209237	0.13318	0.178991
2810405F17Rik	0.014084	0.0232537	0.0379656	0.0208318	0.0468579	0.0513793	0.0307644	0.0482387	0.0248422	0.0309506	0.0144922	0.0511286	0.040805	0.0502582	0.048914	0.0187782	0.0363556	0.0342675	0.0274879	0.0577297	0.0231342
2810414N06Rik	0	0	0.0126579	0	0.0260387	0.0186905	0.0241735	0.0402036	0.00621114	0.0228782	0.0331202	0.035798	0.0178562	0.0390962	0.0351245	0.00469482	0.0280955	0.0221756	0.016036	0.0180496	0.0102826
2810429I04Rik	0.0563083	0	0.0379656	0.0208318	0.0208318	0.0280337	0.0549174	0.0535936	0.0248422	0.0443999	0.0248422	0.035798	0.0357067	0.0223445	0.0351245	0.0281653	0.0627687	0.0282221	0.028633	0.0397008	0.046256
2810454H06Rik	0.195927	0.069711	0.0758765	0.186418	0.103979	0.139732	0.1402	0.152226	0.142376	0.104788	0.115684	0.140205	0.0866263	0.105947	0.127633	0.126424	0.107232	0.130676	0.134758	0.05052	0.112871
2810455O05Rik	0.0281653	0	0.0379656	0	0.00520831	0.0186905	0.015384	0.0294863	0.00931664	0.0269147	0.0227724	0.0204589	0.00510202	0.00558656	0.0225828	0.0187782	0.00826437	0.00604835	0.0171813	0.00722015	0.0128531
2810457G06Rik	0	0	0.0758765	0.145321	0.0520598	0.046712	0.0483328	0.0402036	0.0310509	0.0296054	0.0393273	0.00767256	0.0127548	0.0223445	0.0050188	0.00469482	0.0247908	0.0241912	0.0492355	0.0360932	0.0257041
2810459M11Rik	0	0.0232537	0.0126579	0	0.0416546	0.0233624	0.015384	0.0187657	0.0279467	0.0349861	0.0165624	0.0230159	0.0102039	0	0.0163104	0.0328579	0.0132228	0.0100805	0.0263429	0	0.0179939
2810474O19Rik	0.0984325	0.230511	0.0758765	0.0832372	0.176171	0.172047	0.161929	0.178672	0.188326	0.140853	0.164883	0.107211	0.170097	0.18882	0.196967	0.126424	0.177578	0.158608	0.106329	0.118854	0.120531
2900009J06Rik	0	0.0464949	0.0758765	0.0208318	0.0520598	0.0373745	0.0571118	0.0535936	0.0651712	0.0578412	0.0765298	0.074101	0.0459022	0.0390962	0.0677023	0.0797277	0.0330518	0.0302373	0.0526675	0.0433078	0.0282739
2900011O08Rik	1.49292	0.961253	1.9067	1.5331	1.55859	1.68139	1.53148	1.27317	1.73681	1.43275	1.57858	2.00873	1.36325	1.65653	1.59643	1.6481	1.62271	1.59586	1.6419	1.24092	1.56545
2900026A02Rik	0	0.139086	0.126247	0.124677	0.176171	0.0746969	0.144551	0.144271	0.099216	0.103449	0.128014	0.0944885	0.0331572	0.0446779	0.0989601	0.0703645	0.0743118	0.0362824	0.0618163	0.021659	0.0436879
2900045O20Rik	0	0	0.0126579	0.0624594	0.0260387	0.0233624	0.0373539	0.0482387	0.0248422	0.0322959	0.0165624	0.035798	0.0178562	0.0335133	0.0225828	0.0187782	0.01157	0.0201599	0.0137453	0.00722015	0.0205641
2900052N01Rik	0.0281653	0	0	0	0.0156244	0.0233624	0.0219763	0.0241263	0.0186325	0.0215327	0.012422	0.00767256	0.0178562	0.0279293	0.0263458	0.014084	0.0231384	0.0181442	0.0148906	0.0180496	0.0231342
2900055J20Rik	0.851178	0.743527	0.881374	0.103979	0.232281	0.400428	0.164098	0.377061	0.379056	0.16347	0.319584	0.0766513	0.345147	0.227093	0.386771	0.457998	0.214872	0.25333	0.195769	0.281467	0.589871
2900060B14Rik	0.140384	0.552806	0.151321	0.0624594	0.145321	0.148981	0.168433	0.13365	0.18222	0.159485	0.119796	0.140205	0.122145	0.139215	0.177239	0.191319	0.13021	0.174516	0.138163	0.0649363	0.130733
2900076A07Rik	0.0281653	0.0232537	0.126247	0.0832372	0.160765	0.135103	0.168433	0.252016	0.130068	0.155496	0.142376	0.175567	0.106939	0.144745	0.245945	0.172847	0.187332	0.132675	0.1427	0.0973192	0.140921
2900079G21Rik	0.014084	0.069711	0.201172	0.0832372	0.135006	0.0933224	0.174931	0.144271	0.0806579	0.131518	0.049669	0.0153447	0.0917081	0.0892669	0.230085	0.191319	0.140038	0.0785482	0.0926509	0.0541252	0.0590916
2900089D17Rik	0.014084	0	0.0126579	0	0	0.00467288	0.00659336	0.00804281	0.0217374	0.0148043	0.0144922	0.0153447	0	0.00558656	0.00878282	0.014084	0.01157	0.00403225	0.00458189	0.0108301	0.00514137
2900093K20Rik	0.16822	0.2979	0.138794	0.267627	0.191535	0.249733	0.205151	0.194482	0.169988	0.166126	0.193409	0.203202	0.195187	0.144745	0.226417	0.177471	0.195447	0.182454	0.183392	0.168871	0.130733
2900097C17Rik	1.73988	1.12165	2.07299	2.16784	2.05479	2.20223	2.13393	2.16629	2.08487	2.05512	2.04271	2.01478	2.08539	2.29029	2.07907	2.222	1.86896	1.96517	2.0614	1.8762	2.07329
3100002H09Rik	0.014084	0	0.0126579	0.0208318	0	0.00934566	0	0.0187657	0.012422	0.00403767	0.00414077	0	0.0153055	0	0	0	0	0.00806443	0.0068728	0.00722015	0.00514137
3110001I22Rik	0	0	0	0	0.00520831	0.00467288	0.0109888	0.00804281	0.012422	0.010767	0.00621114	0.00255754	0.0153055	0.011173	0.0050188	0.014084	0.00826437	0.00403225	0.00916367	0.0108301	0.0128531
3110002H16Rik	0.014084	0.139086	0.063249	0.0832372	0.0208318	0.0840133	0.0439419	0.0482387	0.0279467	0.0538098	0.0579386	0.0792011	0.0611863	0.0614139	0.0514202	0.0375499	0.0479155	0.0503819	0.0343575	0.0649363	0.0488238
3110009E18Rik	0.0844068	0	0.0253138	0.0832372	0.0572604	0.0373745	0.0439419	0.0455606	0.0527705	0.0349861	0.0538043	0.033242	0.0484504	0.0502582	0.0564318	0.0797277	0.0627687	0.0483682	0.0526675	0.0252681	0.0770446
3110021N24Rik	0.26451	0.407253	0.213563	0.287682	0.217042	0.30372	0.260771	0.197113	0.314658	0.229475	0.247969	0.145269	0.259822	0.259643	0.184645	0.13108	0.21164	0.229826	0.254961	0.183091	0.284081
3110035E14Rik	0.014084	0.0232537	0	0	0.0260387	0.0373745	0.0263706	0.0214461	0.0620719	0.0242237	0.0248422	0.0255727	0.056093	0.0502582	0.0200739	0.0187782	0.0561688	0.0523954	0.0835226	0.0324853	0.0924134
3110040N11Rik	0.0563083	0.0232537	0.323445	0.206855	0.297668	0.23157	0.303033	0.351939	0.261002	0.259526	0.305772	0.345996	0.170097	0.221644	0.365696	0.278092	0.31068	0.25333	0.242741	0.129601	0.168862
3110043O21Rik	0	0.0232537	0.126247	0.0832372	0.262597	0.139732	0.1706	0.165464	0.145449	0.167453	0.144425	0.132603	0.180146	0.128141	0.138826	0.200531	0.105589	0.110661	0.116574	0.0793391	0.135829
3110045C21Rik	0	0	0.0253138	0	0.0208318	0.0280337	0.015384	0.00804281	0.0186325	0.010767	0.0227724	0.0255727	0.0153055	0.0223445	0.0276	0.0328579	0.0148755	0.0302373	0.0125999	0.0252681	0.0102826
3110062M04Rik	0.0703645	0.116019	0.0758765	0.145321	0.165905	0.102624	0.0856097	0.138963	0.0930334	0.0752989	0.115684	0.0817503	0.0637324	0.128141	0.0864669	0.0844068	0.0825508	0.0825674	0.0880876	0.0433078	0.0821697
3110070M22Rik	0	0	0	0.0208318	0.0156244	0.0280337	0.0175815	0.032166	0.0186325	0.0174957	0.0269119	0.0230159	0.0204067	0.0335133	0.0326166	0.0187782	0.0198334	0.00806443	0.0148906	0.00722015	0.0282739
3110079O15Rik	0	0	0.0379656	0	0.0104165	0.0140182	0	0.00268096	0.00931664	0.00403767	0.00207039	0.00767256	0	0.0223445	0	0.00469482	0.00165289	0.00403225	0.00572735	0.0144399	0.0102826
3110082I17Rik	0	0.0464949	0.0884921	0.0624594	0.186418	0.046712	0.183582	0.154876	0.0961252	0.0913936	0.185274	0.160436	0.0484504	0.0502582	0.154962	0.0703645	0.117088	0.0785482	0.10519	0.0433078	0.0872927
3110082J24Rik	0	0	0	0.0416546	0.00520831	0.00467288	0.00439559	0.0214461	0.00621114	0.010767	0.0144922	0.01023	0.0102039	0.016759	0.0238371	0.0281653	0.0231384	0.0201599	0.0125999	0.0252681	0.00257069
3222401L13Rik	0.0563083	0.116019	0.0379656	0.0416546	0.0780457	0.0513793	0.0483328	0.112364	0.0806579	0.0430553	0.0600054	0.089395	0.147425	0.144745	0.180943	0.158954	0.174322	0.156617	0.0549552	0.129601	0.115425
3300002I08Rik	0.014084	0.0464949	0.0126579	0	0.0104165	0	0.0175815	0.0107237	0.012422	0.0121128	0.0165624	0.0281293	0.00510202	0.00558656	0.0250915	0.00469482	0.0165282	0.0120965	0.0194719	0.00722015	0.00257069
3632451O06Rik	0.449498	0.139086	0.213563	0.287682	0.217042	0.352469	0.196535	0.183947	0.185274	0.140853	0.235901	0.19568	0.101865	0.139215	0.239852	0.214318	0.184083	0.132675	0.230485	0.143907	0.133281
3830406C13Rik	0.182091	0.230511	0.509336	0.554481	0.347152	0.39177	0.34685	0.543839	0.358717	0.415901	0.551349	0.560914	0.402323	0.453562	0.496311	0.491685	0.474549	0.359164	0.382367	0.253591	0.402893
4430402I18Rik	0.154316	0.707042	0.359307	0.206855	0.247466	0.30372	0.277734	0.28049	0.272994	0.285474	0.291903	0.213215	0.262288	0.210727	0.348014	0.309585	0.255076	0.24551	0.274876	0.12602	0.20675
4632404H12Rik	0.0281653	0.0232537	0.0506113	0.186418	0.0312449	0.0327045	0.0593059	0.066974	0.0558715	0.0659011	0.0310509	0.0485742	0.071368	0.0614139	0.0526733	0.0281653	0.0413106	0.0604471	0.036647	0.0144399	0.046256
4632411P08Rik	0.014084	0	0	0.0208318	0	0.0280337	0.015384	0.0053619	0.0279467	0.0134585	0.00621114	0.00767256	0.0153055	0.016759	0.017565	0	0.00991719	0.00604835	0.00458189	0	0
4632415L05Rik	0.223487	0.18499	0.287176	0.536404	0.342238	0.426229	0.319796	0.404434	0.264003	0.345698	0.350931	0.360432	0.352357	0.318605	0.358636	0.384799	0.280601	0.268924	0.267143	0.211418	0.303789
4632428C04Rik	0	0	0.0253138	0.0208318	0.0312449	0.0186905	0.0351576	0.0214461	0.00621114	0.0174957	0.00828148	0.00255754	0.0484504	0.0223445	0.0112921	0.014084	0.00495866	0.0241912	0.00916367	0.00722015	0.00771201
4732414G09Rik	0.0844068	0.0232537	0.0506113	0.0624594	0.0676567	0.0280337	0.0461375	0.0830145	0.049669	0.0752989	0.0868473	0.0460196	0.0815423	0.0446779	0.0225828	0.0281653	0.0132228	0.0181442	0.0355023	0.0180496	0.0257041
4732419C18Rik	0	0.0232537	0.0253138	0	0.0104165	0.00467288	0.0109888	0.0053619	0	0.00403767	0.00207039	0.00255754	0.00255102	0	0.0213284	0.0187782	0	0	0.0194719	0.0036101	0
4732440D04Rik	0.0281653	0.16208	0.0884921	0.0832372	0.0676567	0.0700362	0.0877992	0.0535936	0.0620719	0.0739568	0.0765298	0.0664473	0.0586399	0.0558369	0.0739602	0.0375499	0.07596	0.0443403	0.0560989	0.0360932	0.0436879
4732463B04Rik	0	0	0.0379656	0.0208318	0.0624594	0.0327045	0.0614997	0.032166	0.0279467	0.02826	0.0186325	0.0204589	0.0331572	0.0335133	0.00878282	0.00938953	0.01157	0.0181442	0.0343575	0.021659	0.0385509
4732471J01Rik	0	0	0.0379656	0.0416546	0.0728522	0.0607104	0.0636932	0.072323	0.0527705	0.0618717	0.0351894	0.0306857	0.0509983	0.0390962	0.058937	0.0375499	0.0247908	0.0262067	0.036647	0.021659	0.0282739
4732491K20Rik	0.0563083	0.207804	0.0884921	0.124677	0.114334	0.125836	0.174931	0.152226	0.11157	0.122172	0.134173	0.170528	0.0967876	0.139215	0.189578	0.140384	0.122011	0.0825674	0.126808	0.0865346	0.10009
4732496C06Rik	0	0	0.126247	0.0208318	0.0624594	0.0420437	0.0461375	0.0187657	0.0682699	0.0255692	0.041396	0.0638951	0.0637324	0.0614139	0.0964626	0.0844068	0.07596	0.0906018	0.0721025	0.0288769	0.0385509
4831440E17Rik	0.0281653	0.0232537	0.0253138	0.103979	0.0104165	0.00934566	0.0175815	0.0294863	0.00310559	0.0174957	0.0207025	0.0281293	0.0178562	0.00558656	0.0188195	0.014084	0.00991719	0.00604835	0.0194719	0.0036101	0.0102826
4833418N02Rik	0.014084	0	0	0.0416546	0	0.00934566	0.0021978	0.0134044	0.00310559	0.00807528	0.00621114	0	0	0	0.00627348	0.00469482	0	0.00201613	0.00916367	0	0.00771201
4833420G17Rik	0.278092	0.342124	0.213563	0.287682	0.267627	0.195023	0.286187	0.259802	0.264003	0.208447	0.27798	0.208211	0.257354	0.302622	0.285925	0.27357	0.274236	0.204223	0.199139	0.214947	0.153637
4833422C13Rik	0	0	0.0379656	0	0.0572604	0.0373745	0.0461375	0.0214461	0.0527705	0.0699295	0.0393273	0.00511507	0.0459022	0.0948299	0.0739602	0.060995	0.084198	0.0765382	0.0263429	0.0252681	0.0411195
4833439L19Rik	0.39787	0.139086	0.680441	0.642396	0.585722	0.634194	0.635478	0.589859	0.70182	0.557482	0.583328	0.569702	0.557417	0.655867	0.765059	0.720155	0.594169	0.615614	0.52533	0.353596	0.518825
4833445I07Rik	0	0.0464949	0.0506113	0	0.0468579	0.0327045	0.0351576	0.0428823	0.0341548	0.0363312	0.0331202	0.035798	0.0153055	0.0446779	0.0276	0.0281653	0.0313998	0.0221756	0.0251978	0.00722015	0.0102826
4921504A21Rik	0.042241	0	0.0253138	0	0.0312449	0.0233624	0.0483328	0.0696488	0.0310509	0.0322959	0.0310509	0.0230159	0.0535458	0.0614139	0.0902163	0.0375499	0.0512173	0.0403117	0.0389363	0.0360932	0.0488238
4921507P07Rik	0.014084	0	0.0126579	0	0.0260387	0.0140182	0.0109888	0.00804281	0.0155273	0.01615	0.00621114	0.00767256	0.0102039	0.016759	0.0138013	0.00469482	0.0231384	0.0100805	0.0103091	0.0036101	0.00514137
4921516A02Rik	0	0	0	0.0208318	0.00520831	0	0.00659336	0.00268096	0.00621114	0.00538355	0.00207039	0.00511507	0.00255102	0.00558656	0.00250941	0.00938953	0.00495866	0.00604835	0.00458189	0	0.0102826
4921524J17Rik	0.462236	0.069711	0.335446	0.366725	0.395832	0.22246	0.348921	0.359498	0.335297	0.302241	0.406898	0.365228	0.347552	0.248821	0.343281	0.255429	0.272643	0.272813	0.242741	0.309132	0.28161
4930402H24Rik	0.278092	0.743527	0.429693	0.536404	0.518166	0.579215	0.51341	0.661211	0.444813	0.498599	0.527928	0.459375	0.508423	0.557294	0.563222	0.500028	0.524394	0.385539	0.451823	0.350199	0.46853
4930403P22Rik	0.014084	0.0928896	0.0126579	0.0624594	0.0208318	0.00934566	0.0109888	0.0053619	0.0372585	0.0174957	0.00207039	0.0153447	0.0229572	0.0223445	0.0138013	0.014084	0.0280955	0.0181442	0.0171813	0.0288769	0.00771201
4930404N11Rik	0	0	0	0	0.0156244	0.00934566	0.0109888	0.0134044	0.00931664	0.0121128	0.0207025	0.0153447	0.0178562	0.011173	0.0125467	0.023472	0.0231384	0.0161283	0.00801824	0.0144399	0.0231342
4930413F20Rik	0	0.0464949	0.0126579	0	0.0364503	0.00467288	0.0087911	0.0107237	0.012422	0.0134585	0.0103518	0.0281293	0.0153055	0.00558656	0.0163104	0.023472	0.0165282	0.0120965	0.0137453	0.0252681	0.0128531
4930426D05Rik	0.014084	0	0.0758765	0.0832372	0.0104165	0.0186905	0.0483328	0.0134044	0.0155273	0.0269147	0.339213	0.210713	0.0178562	0.00558656	0.0138013	0.0281653	0.0264432	0.0483682	0.0274879	0.021659	0.0616576
4930430F08Rik	0.112439	0.16208	0.0506113	0.103979	0.150473	0.121198	0.12931	0.170751	0.163862	0.11549	0.140326	0.135138	0.114545	0.117051	0.173532	0.145031	0.180831	0.128677	0.0903695	0.147479	0.102647
4930432K21Rik	0.0281653	0	0.0126579	0	0.00520831	0.0186905	0.0109888	0.0187657	0.00310559	0.0228782	0.0269119	0.0127874	0.00510202	0.011173	0.0125467	0.023472	0.0132228	0.0141124	0.0125999	0.0036101	0.0102826
4930444M15Rik	0	0.116019	0.0253138	0.0208318	0.0104165	0.0186905	0.0439419	0.0214461	0.0186325	0.0403659	0.0207025	0.0204589	0.0127548	0.0279293	0.0263458	0.0375499	0.0148755	0.0241912	0.0206171	0.0144399	0.0179939
4930444P10Rik	0	0	0	0.0208318	0.0468579	0	0.0241735	0.0375247	0.0310509	0.0309506	0.0207025	0.0179019	0	0.00558656	0.0213284	0.023472	0.0132228	0.0241912	0.0217623	0.0180496	0.0128531
4930447C04Rik	0.014084	0.449795	0.0253138	0.0208318	0.109158	0.130471	0.142376	0.231179	0.142376	0.216343	0.0703354	0.0281293	0.114545	0.291925	0.219072	0.13108	0.248669	0.202247	0.135893	0.0541252	0.140921
4930451I11Rik	0	0	0	0	0.0104165	0	0.00659336	0.00268096	0.00621114	0.00134589	0.0103518	0.00511507	0	0	0.00376411	0.00469482	0.00661152	0	0.00458189	0.0036101	0
4930452B06Rik	0	0	0.0506113	0.0416546	0.0416546	0.0840133	0.0439419	0.0963655	0.0868473	0.0618717	0.0600054	0.0485742	0.0229572	0.0781328	0.0501672	0.00469482	0.0297477	0.0141124	0.0435143	0.00722015	0.0257041
4930453N24Rik	0.112439	0.069711	0.138794	0.103979	0.0832372	0.111916	0.0921771	0.101701	0.077562	0.1195	0.113627	0.104668	0.101865	0.111501	0.113932	0.135733	0.115446	0.0785482	0.082381	0.108093	0.0898533
4930455G09Rik	0	0.0464949	0.0506113	0.0208318	0.0104165	0.0233624	0.00659336	0.00804281	0.0186325	0.00672942	0.012422	0.0153447	0.0127548	0.00558656	0.0100375	0.00938953	0.0264432	0.0181442	0.0125999	0	0.00514137
4930458D05Rik	0.042241	0	0.0126579	0	0.0208318	0.0280337	0.0219763	0.0187657	0.0403617	0.0403659	0.0144922	0.00511507	0.0127548	0.0223445	0.0050188	0.00938953	0.00495866	0.00403225	0.0148906	0.0036101	0.0308434
4930461C15Rik	0	0	0	0.0208318	0	0.00934566	0.00439559	0.00268096	0.00310559	0.00134589	0.00207039	0.00255754	0.00255102	0	0.00376411	0	0.00165289	0	0.00343642	0	0.0102826
4930480K23Rik	0.0281653	0	0.0126579	0	0.0104165	0.00934566	0.00659336	0.0107237	0.012422	0.00807528	0.0186325	0.00255754	0.0102039	0.016759	0.0100375	0.00938953	0.01157	0.00806443	0.00916367	0.0036101	0.00257069
4930481A15Rik	0.0844068	0	0.101094	0.0416546	0.0364503	0.0607104	0.0329611	0.0402036	0.0372585	0.033641	0.0765298	0.0434646	0.0433538	0.0279293	0.042647	0.0703645	0.021486	0.0463544	0.0400809	0.021659	0.0385509
4930488L21Rik	0	0	0.0126579	0.0416546	0.0156244	0.0186905	0.0175815	0.0375247	0.0155273	0.0148043	0.0227724	0.0255727	0.0204067	0	0.017565	0.00469482	0.0231384	0.0181442	0.0125999	0.00722015	0.0179939
4930500F10Rik	0.014084	0	0	0	0.00520831	0.00467288	0.0109888	0.0107237	0.012422	0.00538355	0.0144922	0.0153447	0.00765299	0.011173	0.0301084	0.00469482	0.0165282	0.0120965	0.0068728	0.0036101	0.00514137
4930500L23Rik	0.014084	0	0.0758765	0.0208318	0.0260387	0.0373745	0.0307644	0.101701	0.0651712	0.0524658	0.0269119	0.00767256	0.0891675	0.0892669	0.110191	0.0656805	0.110519	0.0604471	0.0400809	0.0324853	0.046256
4930502E18Rik	0	0.0928896	0.0126579	0.0208318	0	0.00934566	0.00439559	0.00268096	0.00310559	0.00538355	0.0186325	0.0204589	0.0127548	0.00558656	0.0012547	0.00938953	0.00661152	0	0.00572735	0	0.0102826
4930503L19Rik	0	0.0928896	0	0.0208318	0.0520598	0.046712	0.0373539	0.0402036	0.0341548	0.0363312	0.0351894	0.035798	0.0484504	0.0502582	0.0313625	0.0328579	0.042962	0.0241912	0.0446587	0.0360932	0.0205641
4930507D05Rik	0	0	0.0253138	0	0.00520831	0.00467288	0.0241735	0.0268064	0.0310509	0.0134585	0.00414077	0.0127874	0.0229572	0.00558656	0.0138013	0.023472	0.0132228	0.0141124	0.0137453	0.0108301	0.0231342
4930509G22Rik	0	0	0	0.0416546	0.0156244	0.00934566	0.0131864	0.0053619	0.0186325	0.00942113	0.00828148	0.00511507	0	0.00558656	0.00627348	0	0	0.00201613	0.0103091	0.00722015	0
4930513N10Rik	0	0	0.0126579	0	0.00520831	0.00934566	0.0241735	0.0375247	0.00621114	0.00538355	0.012422	0.0153447	0.00510202	0.00558656	0.0225828	0.0187782	0.0198334	0.0141124	0.00801824	0.00722015	0.0128531
4930515G01Rik	0	0.0232537	0	0	0.0208318	0.00934566	0.00659336	0.0134044	0.00310559	0.00942113	0.012422	0.01023	0.00510202	0	0.0100375	0.00469482	0.00991719	0.00806443	0.00801824	0.00722015	0.00514137
4930518I15Rik	0	0	0.0506113	0.0832372	0.0468579	0.0373745	0.0395501	0.0428823	0.0434646	0.02826	0.0186325	0.0434646	0.0178562	0.0279293	0.0363784	0.042241	0.0380074	0.0141124	0.028633	0.0469142	0.0282739
4930522L14Rik	0.126424	0.0232537	0.0126579	0	0.0208318	0.0186905	0.015384	0.032166	0.0403617	0.0255692	0.0186325	0.0179019	0.0127548	0.016759	0.0225828	0.00469482	0.01157	0.0181442	0.0206171	0.0469142	0.0385509
4930523C07Rik	0	0	0	0.0208318	0.00520831	0.00467288	0	0.0053619	0	0.00134589	0	0	0.0255074	0	0.00250941	0.00938953	0.00165289	0.00403225	0.00343642	0.140333	0.00514137
4930524B15Rik	0	0	0.0253138	0.0208318	0.0208318	0	0.0109888	0.0160851	0.0155273	0.00538355	0.0144922	0.0153447	0.0102039	0	0.0125467	0.00938953	0.01157	0.00403225	0.0068728	0	0.00514137
4930524J08Rik	0.014084	0	0.0379656	0.0832372	0.0156244	0.0746969	0.015384	0.0375247	0.0279467	0.0201871	0.0351894	0.0230159	0.0204067	0.0279293	0.0338706	0.0281653	0.0165282	0.0100805	0.0125999	0.0180496	0.0128531
4930524O07Rik	0	0	0	0.0208318	0.0104165	0.00934566	0.0021978	0.0214461	0	0.00269179	0.00621114	0.00511507	0	0.016759	0.00627348	0	0.00330578	0.00604835	0.00458189	0.0108301	0.00257069
4930525G20Rik	0	0	0	0.0208318	0.00520831	0.00467288	0.00439559	0.00804281	0	0.00403767	0.00828148	0.00255754	0.00510202	0.00558656	0.00752816	0	0.00330578	0.00403225	0.00916367	0.0108301	0.00257069
4930532G15Rik	0.16822	0.552806	0.101094	0.124677	0.17104	0.0886688	0.146726	0.173393	0.139301	0.142185	0.123906	0.132603	0.0433538	0.166823	0.123899	0.13108	0.13021	0.122676	0.12908	0.0721396	0.10776
4930539E08Rik	0	0	0.0506113	0	0.0728522	0.0140182	0.0636932	0.0562706	0.0372585	0.0269147	0.0393273	0.035798	0.00765299	0.0279293	0.0276	0.0187782	0.0330518	0.0382971	0.0263429	0.0036101	0.00771201
4930539J05Rik	0	0.069711	0.0506113	0.103979	0.0572604	0.0140182	0.0263706	0.0375247	0.049669	0.0255692	0.0517368	0.0536827	0.0178562	0.0279293	0.0326166	0.023472	0.0280955	0.0141124	0.0274879	0.0252681	0.0257041
4930544F09Rik	0	0.0464949	0.0126579	0	0.0260387	0	0.0373539	0.032166	0.00621114	0.00538355	0.0103518	0.00255754	0.00255102	0	0.0050188	0	0.00165289	0	0.00229095	0	0.00257069
4930553P18Rik	0.014084	0	0.0253138	0	0.0520598	0.0373745	0.0307644	0.0375247	0.0279467	0.0349861	0.0372585	0.0230159	0.0459022	0.0558369	0.042647	0.0375499	0.0347038	0.0322525	0.0194719	0.021659	0.0282739
4930558K02Rik	0	0	0	0.0208318	0	0.0233624	0.00439559	0.0134044	0.0248422	0.0148043	0.0144922	0.00255754	0.0127548	0.016759	0.00878282	0.00469482	0.0165282	0.0141124	0.0125999	0	0.00514137
4930570G19Rik	0.126424	0.0464949	0.0884921	0.0624594	0.206855	0.135103	0.133668	0.162819	0.130068	0.143518	0.197472	0.2257	0.0917081	0.17233	0.172296	0.0844068	0.166176	0.104648	0.102911	0.0397008	0.0975317
4930579G24Rik	0	0.0464949	0.0126579	0.0208318	0.0312449	0.00467288	0.0285675	0.0214461	0.012422	0.00942113	0.0207025	0.0127874	0.00510202	0	0.00752816	0.0187782	0.01157	0.0120965	0.0148906	0.0469142	0.00771201
4930589L23Rik	0	0	0	0	0.0104165	0	0.0021978	0.0187657	0.00931664	0.00269179	0.00621114	0.0127874	0	0.011173	0.00878282	0.014084	0.0132228	0.0120965	0.00229095	0.0144399	0
4930590J08Rik	0	0.0232537	0.0126579	0.0208318	0.0156244	0.0327045	0.015384	0.0214461	0.0155273	0.0188414	0.0144922	0.0153447	0.0204067	0.016759	0.00752816	0.023472	0.0132228	0.00806443	0.016036	0.00722015	0.0257041
4930593C16Rik	0.014084	0	0	0	0.0208318	0	0.0109888	0.0134044	0.00931664	0.00269179	0.00828148	0.00255754	0.00510202	0.011173	0.00752816	0	0.00165289	0.00403225	0	0	0.00257069
4930598A11Rik	0.014084	0	0	0	0	0	0	0.00268096	0.00310559	0.00269179	0.00414077	0.00511507	0.00765299	0.011173	0.00250941	0	0.00165289	0.00201613	0.00229095	0	0.00514137
4931406C07Rik	0.0844068	0.116019	0.0379656	0.0624594	0.135006	0.0886688	0.12931	0.0749967	0.114655	0.0994323	0.101276	0.122456	0.104402	0.072562	0.112685	0.140384	0.0907843	0.0845766	0.0858053	0.05052	0.0744812
4931406P16Rik	0.140384	0.0232537	0.188751	0.32745	0.252516	0.204186	0.224483	0.293361	0.248973	0.187328	0.2238	0.173048	0.170097	0.166823	0.199428	0.191319	0.188956	0.202247	0.183392	0.13318	0.20675
4931414P19Rik	0.014084	0.0232537	0.0126579	0	0	0	0.015384	0.0214461	0.00621114	0.0148043	0.00828148	0.0127874	0.0178562	0.00558656	0.0100375	0.023472	0.0247908	0.0201599	0.0217623	0.00722015	0.00771201
4931428F04Rik	0.140384	0.116019	0.213563	0.124677	0.176171	0.144358	0.159759	0.225954	0.185274	0.154167	0.140326	0.150328	0.185165	0.227093	0.215395	0.209727	0.197069	0.148646	0.138163	0.122438	0.117978
4931440F15Rik	0.014084	0.0232537	0.0253138	0.0208318	0.0416546	0.0140182	0.0351576	0.0428823	0.046567	0.0497776	0.0207025	0.0230159	0.0357067	0.0502582	0.0276	0.0328579	0.0165282	0.0302373	0.0251978	0.00722015	0.0308434
4932422M17Rik	0.0703645	0.0464949	0.0506113	0.0624594	0.0364503	0.0793559	0.0417461	0.0428823	0.0341548	0.0484333	0.0558715	0.0204589	0.0229572	0.0390962	0.0564318	0.060995	0.061119	0.0382971	0.0480914	0.0252681	0.0257041
4932438A13Rik	0.474904	0.275569	0.464165	0.536404	0.545463	0.587169	0.59317	0.578456	0.589485	0.53765	0.59912	0.653295	0.680857	0.547633	0.635209	0.533077	0.620555	0.472177	0.505158	0.267555	0.514301
4932443I19Rik	0	0	0	0	0.0676567	0.00934566	0.0395501	0.0616232	0.0372585	0.02826	0.0641382	0.0255727	0.00765299	0.011173	0.0188195	0.00938953	0.00826437	0.0181442	0.00916367	0.00722015	0.0102826
4933404O12Rik	0.042241	0	0.0379656	0.0416546	0.0416546	0.0607104	0.0658864	0.0749967	0.083753	0.0672441	0.0558715	0.0715502	0.0255074	0.0223445	0.0814657	0.0750469	0.061119	0.0483682	0.0480914	0.021659	0.0436879
4933405L10Rik	0	0	0.0126579	0	0.0104165	0	0.00659336	0.00804281	0.00931664	0.00538355	0.00207039	0.0127874	0.00255102	0	0.00752816	0.00469482	0.01157	0.00403225	0.00114548	0.0036101	0.00514137
4933406C10Rik	0	0	0.0253138	0	0.0260387	0.0186905	0.0197789	0.0241263	0.00931664	0.0174957	0.0289815	0.033242	0.0102039	0	0.0200739	0.0187782	0.021486	0.0181442	0.016036	0.0108301	0.0154236
4933406I18Rik	0.0281653	0	0.0126579	0.0208318	0.0208318	0.00467288	0.00659336	0.0107237	0.00621114	0.0121128	0.00414077	0.00767256	0.00765299	0.0223445	0.0263458	0.00469482	0.0165282	0.00806443	0.0125999	0.0036101	0.00771201
4933406P04Rik	0.014084	0	0.0253138	0	0.0104165	0.00934566	0.00659336	0.0214461	0.012422	0.0148043	0.00828148	0.00511507	0.0102039	0.016759	0.0200739	0.00469482	0.00495866	0.0120965	0.0137453	0.00722015	0.00771201
4933407L21Rik	0	0	0.0758765	0.0832372	0.103979	0.0233624	0.120587	0.152226	0.0558715	0.0605283	0.11157	0.102124	0.0255074	0.0446779	0.0263458	0.0281653	0.0231384	0.0161283	0.0423699	0.0288769	0.0179939
4933408B17Rik	0.014084	0.0232537	0.0379656	0.0416546	0.0260387	0.0420437	0.0197789	0.0268064	0.0186325	0.0228782	0.0165624	0.033242	0.0280575	0.0279293	0.0388861	0.00938953	0.0181808	0.0302373	0.0183266	0.0108301	0.0231342
4933412O06Rik	0	0	0.0253138	0.0416546	0.0780457	0.0140182	0.0241735	0.0375247	0.0186325	0.0215327	0.0310509	0.0153447	0.00255102	0	0.0200739	0.023472	0.01157	0.00403225	0.0137453	0.0036101	0.0128531
4933415A04Rik	0	0.139086	0	0	0	0.00467288	0	0.00268096	0.00310559	0.00134589	0.00207039	0.00255754	0	0	0.00376411	0	0.00330578	0	0.00114548	0.0433078	0
4933424G06Rik	0.014084	0.0232537	0.0253138	0.0208318	0.0416546	0	0.0197789	0.0268064	0.0217374	0.00942113	0.012422	0.0255727	0.0127548	0	0.0225828	0.014084	0.0181808	0.0181442	0.0171813	0	0.0179939
4933427D14Rik	0.0281653	0.116019	0.0758765	0.124677	0.129843	0.0933224	0.138023	0.165464	0.105395	0.111478	0.136224	0.117377	0.071368	0.0892669	0.111438	0.154316	0.125292	0.0885937	0.101772	0.0469142	0.0796074
4933428P19Rik	0	0	0.0253138	0	0.0260387	0.00467288	0.0131864	0.0134044	0.0186325	0.0174957	0.0186325	0.00767256	0.00510202	0.00558656	0.0100375	0.00469482	0.01157	0.00604835	0.0103091	0	0.0102826
4933429H19Rik	0	0.0464949	0	0.0208318	0	0.00934566	0.0087911	0.0107237	0.012422	0.00134589	0.00828148	0	0	0	0.00376411	0.00938953	0.00330578	0	0.00114548	0.0036101	0.00514137
4933431E20Rik	0.0703645	0	0.275002	0.32745	0.201753	0.22246	0.187903	0.233789	0.227837	0.197898	0.215714	0.188146	0.252413	0.232536	0.247162	0.200531	0.230998	0.184436	0.230485	0.129601	0.173929
4933434E20Rik	0.701576	0.207804	0.760106	0.836482	0.786244	0.792804	0.879819	0.821369	0.896662	0.764506	0.795418	0.676182	0.929249	0.877418	0.851791	0.823797	0.838666	0.824668	0.726933	0.705376	0.75222
5031425E22Rik	0.487502	0.253103	0.250535	0.307625	0.332387	0.33483	0.277734	0.324057	0.341169	0.306099	0.311698	0.336334	0.328257	0.329216	0.35274	0.31406	0.318552	0.286392	0.254961	0.204351	0.296412
5031425F14Rik	0.014084	0.0464949	0.299308	0	0.0416546	0.0840133	0.015384	0.0107237	0.578918	0.74377	0.0538043	0.0153447	0.00255102	0.011173	0.00752816	0	0.00165289	0.0120965	0.0274879	0.0144399	0.0282739
5031439G07Rik	0.154316	1.5619	0.323445	0.405465	0.476549	0.39177	0.390035	0.339297	0.332357	0.331703	0.281963	0.338752	0.202691	0.329216	0.324274	0.35847	0.343612	0.255283	0.352344	0.267555	0.254319
5033403F01Rik	0	0.0232537	0.0126579	0.0208318	0.0156244	0.00467288	0.0021978	0.0053619	0.00310559	0.00538355	0.0186325	0.0204589	0.00255102	0.00558656	0.00250941	0.00469482	0.0132228	0.00201613	0.00572735	0.00722015	0
5033406O09Rik	0	0	0.0884921	0.0416546	0.0312449	0.125836	0.100927	0.104368	0.0186325	0.0215327	0.00828148	0.01023	0.040805	0.00558656	0.0050188	0.00469482	0.039659	0.0181442	0.028633	0.0036101	0.0642232
5033417F24Rik	0.0281653	0	0.0126579	0.0416546	0.0624594	0.0233624	0.0505279	0.0509163	0.0372585	0.0296054	0.0434646	0.0434646	0.0433538	0.0223445	0.0413934	0.0375499	0.0247908	0.0282221	0.036647	0.0252681	0.0334128
5033430I15Rik	0.014084	0.069711	0.063249	0.145321	0.103979	0.144358	0.138023	0.109699	0.120824	0.162142	0.0827214	0.122456	0.127208	0.150272	0.291946	0.145031	0.26786	0.148646	0.0755295	0.104503	0.10776
5330413P13Rik	0	0	0	0	0.0416546	0.00467288	0.0197789	0.032166	0.0248422	0.0174957	0.0289815	0.0434646	0.0102039	0	0.0163104	0.014084	0.021486	0.00806443	0.0137453	0.00722015	0.00771201
5330417C22Rik	0.0984325	0.275569	0.225921	0.0624594	0.457799	0.121198	0.436551	0.369547	0.209641	0.26343	0.177126	0.238152	0.109475	0.122598	0.25446	0.163589	0.159651	0.164579	0.170987	0.12602	0.123082
5330434G04Rik	0.632941	1.17526	0.710775	0.572395	0.790169	0.760878	0.713679	0.721323	0.689416	0.713213	0.733638	0.617326	0.676741	0.816736	0.796412	0.617316	0.489328	0.680194	0.605983	0.305686	0.647816
5430402O13Rik	0	0	0	0	0.0208318	0.00467288	0.0021978	0.0241263	0	0.00538355	0.00621114	0.0204589	0.0102039	0.011173	0.00250941	0.00469482	0.00165289	0.00604835	0.00572735	0	0.00257069
5430403G16Rik	0.014084	0.0232537	0	0.0208318	0.0624594	0.00934566	0.0175815	0.0187657	0.0155273	0.00538355	0.0248422	0.0204589	0.0153055	0.0279293	0.0138013	0.00469482	0.00495866	0.0141124	0.0171813	0.0180496	0.00771201
5430416N02Rik	0.042241	0	0.113679	0.145321	0.109158	0.0886688	0.0965532	0.107034	0.0806579	0.0752989	0.078594	0.0995796	0.0509983	0.0837011	0.108944	0.089084	0.0907843	0.0885937	0.0835226	0.0685384	0.0616576
5430431A17Rik	0	0.0232537	0.0126579	0	0.00520831	0.0186905	0.0021978	0.0187657	0.00310559	0.00942113	0.00828148	0.01023	0.0102039	0	0.00878282	0.00469482	0.01157	0	0.00458189	0.0108301	0.00257069
5530401A14Rik	0	0	0.0126579	0	0.0156244	0.00934566	0.00439559	0	0.00621114	0.00807528	0.00621114	0.00511507	0	0	0.0050188	0.00938953	0.00495866	0.00403225	0.0068728	0	0.00257069
5730403I07Rik	0	0	0	0	0.0104165	0	0.0021978	0.00268096	0	0.00538355	0.0269119	0.0179019	0	0	0.0012547	0	0	0	0.00458189	0	0
5730409E04Rik	0.250881	0.0928896	0.520483	0.287682	0.307625	0.39177	0.338551	0.384553	0.332357	0.279004	0.285943	0.377182	0.267217	0.478712	0.444445	0.331901	0.374645	0.29799	0.251632	0.15105	0.271709
5730422E09Rik	0	0	0.0126579	0	0.0156244	0.00467288	0.0087911	0.0160851	0.00310559	0.00269179	0.00828148	0.00511507	0.0102039	0.00558656	0.0100375	0	0.00661152	0.0100805	0.00343642	0	0.00257069
5730455P16Rik	0.345215	0.207804	0.441239	0.518166	0.434149	0.510276	0.540351	0.619187	0.44199	0.54934	0.469143	0.514133	0.451355	0.463655	0.46714	0.445237	0.400756	0.385539	0.430978	0.326308	0.449958
5730480H06Rik	0.0984325	0.18499	0.151321	0.0624594	0.0987975	0.107271	0.114038	0.136307	0.0868473	0.100771	0.107454	0.0944885	0.0815423	0.0948299	0.142553	0.089084	0.136763	0.0966238	0.0812394	0.0685384	0.0821697
5730522E02Rik	0	0	0.0126579	0	0	0.00934566	0.0131864	0.00268096	0.00931664	0.00807528	0.0103518	0.0230159	0.00510202	0.011173	0.0238371	0.0187782	0.00826437	0.00604835	0.0137453	0.0036101	0.0179939
5830454E08Rik	0	0.116019	0.0253138	0.0832372	0.0832372	0.046712	0.0768474	0.0749967	0.071368	0.0551537	0.0703354	0.0587897	0.066278	0.0614139	0.0739602	0.107772	0.0743118	0.0523954	0.0572425	0.0360932	0.0642232
5930430L01Rik	0.0984325	0	0.0506113	0.206855	0.0676567	0.130471	0.0877992	0.112364	0.0868473	0.100771	0.0806579	0.0485742	0.106939	0.0558369	0.128878	0.112439	0.021486	0.0906018	0.0812394	0.0144399	0.0590916
6030419C18Rik	0.31853	0.069711	0.520483	0.774409	0.419848	0.510276	0.458492	0.491976	0.38195	0.386034	0.38195	0.365228	0.385769	0.381723	0.588946	0.644571	0.5546	0.419077	0.383433	0.284937	0.354966
6030443J06Rik	0	0	0.0253138	0	0.00520831	0	0.0131864	0.0107237	0.0155273	0.00672942	0.012422	0.00511507	0.00765299	0.011173	0.0150559	0.00938953	0.00826437	0.0120965	0.0125999	0.0036101	0.00771201
6030445D17Rik	0	0	0.0253138	0	0.00520831	0.00934566	0.00439559	0.0107237	0.00621114	0.00672942	0.00828148	0.00511507	0.0127548	0	0.00752816	0.00938953	0.00495866	0.00604835	0.00801824	0.0144399	0.00771201
6030458C11Rik	0.112439	0.116019	0.188751	0.145321	0.211951	0.199606	0.250131	0.199742	0.242945	0.192616	0.2238	0.240638	0.109475	0.144745	0.249596	0.246328	0.221329	0.174516	0.154029	0.104503	0.166327
6230400D17Rik	0	0.0464949	0.0253138	0.0208318	0.0676567	0.0233624	0.0483328	0.0910271	0.0651712	0.0618717	0.0682699	0.0434646	0.0764561	0.0781328	0.0752114	0.0656805	0.0413106	0.0624594	0.0595296	0.0397008	0.0565252
6330403K07Rik	3.1331	2.65068	3.79158	2.99198	3.94539	3.36559	3.89871	3.78641	3.82031	3.68749	3.86011	3.64778	3.44451	3.40045	3.74442	3.58168	3.79367	3.71368	3.68716	3.11156	3.44695
6330403L08Rik	0	0.0464949	0.0379656	0.0208318	0.0364503	0.0513793	0.0527228	0.0375247	0.0341548	0.0417107	0.041396	0.035798	0.0127548	0.0502582	0.0351245	0.014084	0.0280955	0.0282221	0.0240527	0.0397008	0.0179939
6330409D20Rik	0	0	0.063249	0.0624594	0.0572604	0.0700362	0.0571118	0.0402036	0.0651712	0.0470889	0.049669	0.0281293	0.0306075	0.0390962	0.0614419	0.0750469	0.0446133	0.0362824	0.045803	0.00722015	0.0539584
6330418K02Rik	0.042241	0	0.101094	0.165905	0.165905	0.135103	0.122768	0.154876	0.102306	0.138187	0.164883	0.19568	0.162549	0.128141	0.168585	0.107772	0.108876	0.104648	0.0937914	0.0288769	0.0975317
6330562C20Rik	0.0984325	0.0464949	0.0379656	0.0416546	0.0676567	0.0373745	0.0549174	0.072323	0.0620719	0.0524658	0.049669	0.0306857	0.0331572	0.0223445	0.0338706	0.0187782	0.0198334	0.0322525	0.0343575	0.0180496	0.0231342
6430503K07Rik	0	0	0	0	0	0.00934566	0.0131864	0.0053619	0.00931664	0.00269179	0.00621114	0.01023	0.00510202	0.00558656	0.00376411	0	0.00330578	0.00403225	0.00801824	0.0180496	0.00514137
6430531B16Rik	0	0	0.0126579	0	0.0468579	0.0140182	0.0439419	0.0482387	0.0186325	0.0148043	0.0372585	0.0179019	0.00765299	0.0279293	0.0213284	0.0187782	0.0231384	0.0120965	0.0194719	0.00722015	0.0154236
6430548M08Rik	0.644571	0.069711	0.531572	0.572395	0.697309	0.645762	0.555588	0.754706	0.664331	0.918934	0.524301	0.419787	0.395241	0.463655	0.429576	0.528974	0.326405	0.317233	0.41101	0.394055	0.45694
6430571L13Rik	0.0703645	0	0.0253138	0.0416546	0.0416546	0.0280337	0.0263706	0.0187657	0.0279467	0.0322959	0.0269119	0.0255727	0.0153055	0.0279293	0.0401398	0.0375499	0.0247908	0.0282221	0.0274879	0.0397008	0.0282739
6430573F11Rik	0.0563083	0.0232537	0.063249	0.0208318	0.0624594	0.0186905	0.1402	0.334225	0.0310509	0.118164	0.0186325	0.0255727	0.0331572	0.0781328	0.0188195	0.0187782	0.07596	0.0181442	0.102911	0.0865346	0.0385509
6430573P05Rik	0	0	0	0.0208318	0.00520831	0.00934566	0.0131864	0.0214461	0.012422	0.010767	0.012422	0.00767256	0.00255102	0	0.0125467	0.00938953	0.00991719	0.00604835	0.00801824	0.0144399	0.0128531
6430628N08Rik	0.014084	0	0.101094	0.0208318	0.0364503	0	0.0197789	0.0134044	0.0155273	0.00269179	0.113627	0.0460196	0.00255102	0	0.0138013	0.023472	0.00495866	0.00201613	0.0194719	0.0108301	0.00257069
6530403H02Rik	0	0	0.0253138	0	0.0104165	0	0.0219763	0.0107237	0.0217374	0.00269179	0.00414077	0.00511507	0	0.0223445	0.0150559	0	0.162915	0.0181442	0.00801824	0.00722015	0.00771201
6530409C15Rik	0	0.0232537	0.0253138	0.0208318	0.0156244	0.00934566	0.0175815	0.0134044	0.0279467	0.00672942	0.0144922	0.0127874	0.0178562	0.016759	0.0163104	0.014084	0.0148755	0.0241912	0.0103091	0.0180496	0.0205641
6530437J22Rik	0.014084	0	0	0	0.0208318	0.0186905	0.0175815	0.0160851	0.0341548	0.00942113	0.0186325	0.00767256	0.0178562	0.011173	0.0188195	0.00938953	0.0297477	0.0241912	0.016036	0.0180496	0.0128531
6720427I07Rik	0.014084	0.069711	0.0379656	0	0.0156244	0.0186905	0.015384	0.0134044	0.00931664	0.0148043	0.0207025	0.0179019	0.0357067	0.011173	0.0313625	0.0281653	0.0313998	0.0100805	0.0206171	0.0433078	0.0257041
6720483E21Rik	0	0.0928896	0	0	0.0156244	0.00934566	0.0087911	0.00268096	0.00931664	0.00942113	0.00828148	0.0179019	0.0102039	0.011173	0.00376411	0	0.00661152	0.00604835	0.0103091	0.00722015	0.0128531
6720489N17Rik	0	0	0	0.0416546	0	0.0140182	0.00659336	0.0214461	0.00931664	0.00672942	0.00621114	0.0153447	0.0178562	0.011173	0.0388861	0.014084	0.0280955	0.0120965	0.0125999	0.0108301	0.0154236
6820408C15Rik	0.042241	0.116019	0	0.0624594	0.0987975	0.0327045	0.072464	0.0428823	0.0217374	0.0363312	0.0455329	0.01023	0.0509983	0.0279293	0.0401398	0.014084	0.00826437	0.0302373	0.0114545	0.0252681	0.0231342
8030423F21Rik	0	0	0.0126579	0	0.0104165	0.00467288	0.0021978	0.00268096	0.00310559	0.00672942	0.00207039	0	0.00510202	0.011173	0.0100375	0.00938953	0.00826437	0.00604835	0.00801824	0.0036101	0.0102826
8030462N17Rik	0.0281653	0	0.0126579	0	0	0.00467288	0.00439559	0.0053619	0.0155273	0.00807528	0.00207039	0.00511507	0.00765299	0	0.0050188	0	0.00165289	0.00806443	0.0068728	0	0.0128531
8430432A02Rik	0	0	0	0	0.0208318	0.00467288	0.00659336	0.0107237	0.00310559	0.00672942	0.0144922	0.00767256	0	0.016759	0.0125467	0.00469482	0.00991719	0.0100805	0.00343642	0	0.0102826
9030025P20Rik	0	0.0464949	0	0.0208318	0.00520831	0.0140182	0.0109888	0.0294863	0.046567	0.0309506	0.0372585	0.0638951	0.040805	0.0446779	0.0338706	0.014084	0.0280955	0.0403117	0.029778	0.0108301	0.0231342
9030612E09Rik	0	0.0232537	0.0253138	0.0208318	0.0416546	0.0280337	0.0329611	0.0509163	0.0248422	0.0430553	0.0248422	0.0306857	0.0102039	0.0335133	0.0338706	0.0563083	0.0280955	0.0342675	0.0194719	0.0180496	0.0488238
9030624G23Rik	0	0	0.0126579	0	0.00520831	0	0.0131864	0.0160851	0.00931664	0.00807528	0.0165624	0.00767256	0.00765299	0.0223445	0.0138013	0.014084	0.0132228	0.00604835	0.00801824	0.00722015	0.0102826
9030624J02Rik	0.291624	0.275569	0.275002	0.347152	0.312593	0.204186	0.245867	0.275329	0.251983	0.224227	0.249976	0.243122	0.180146	0.2434	0.203117	0.241769	0.19869	0.162589	0.237175	0.158184	0.246843
9130011E15Rik	0	0.0464949	0	0	0	0.00934566	0.0175815	0.0134044	0.0155273	0.010767	0.00621114	0.00767256	0.00510202	0.016759	0.00878282	0.00938953	0.00165289	0.00806443	0.00801824	0.0108301	0
9130019O22Rik	0	0	0	0.0416546	0.0312449	0.0140182	0.0241735	0.0241263	0.00931664	0.0201871	0.0351894	0.0179019	0.0204067	0.016759	0.0225828	0.0375499	0.0132228	0.0221756	0.0125999	0.0108301	0.0205641
9130023H24Rik	0.0281653	0	0	0	0.0104165	0.0140182	0.0131864	0.0241263	0.00621114	0.0121128	0.0103518	0.00767256	0.0229572	0.00558656	0.0112921	0.00469482	0.0165282	0.0120965	0.0068728	0	0.0102826
9130213A22Rik	0.014084	0	0	0.0624594	0	0.0140182	0.00439559	0.0134044	0.0155273	0.0134585	0.0144922	0.0127874	0.00510202	0.00558656	0.0125467	0.00469482	0.00495866	0.00403225	0.00572735	0.0036101	0.00257069
9130221H12Rik	0.0563083	0	0	0.0208318	0.0468579	0.0513793	0.0329611	0.0268064	0.046567	0.0296054	0.0331202	0.0255727	0.00765299	0.0335133	0.0163104	0.014084	0.0231384	0.0120965	0.0206171	0.0108301	0.0154236
9130401M01Rik	0.250881	0.116019	0.394732	0.424624	0.467193	0.312639	0.43254	0.364527	0.390612	0.355835	0.333337	0.333914	0.428127	0.334509	0.391433	0.419511	0.423583	0.34208	0.37061	0.218474	0.301332
9130604C24Rik	0.014084	0.0232537	0.0253138	0.0416546	0.0104165	0.046712	0.0175815	0.0294863	0.0217374	0.0242237	0.0227724	0.0281293	0.0127548	0.0335133	0.045154	0.014084	0.0413106	0.0201599	0.0137453	0.0469142	0.0179939
9230110C19Rik	0.0281653	0	0.0379656	0.0208318	0.0156244	0.0140182	0.0219763	0.0214461	0.0248422	0.0309506	0.0248422	0.01023	0.0204067	0.011173	0.0150559	0.014084	0.0264432	0.0201599	0.0206171	0	0.0128531
9330020H09Rik	0.0844068	0.0232537	0.0126579	0.0208318	0.0676567	0.0700362	0.0549174	0.0589471	0.0372585	0.0672441	0.0558715	0.0536827	0.0611863	0.0781328	0.0526733	0.0703645	0.0479155	0.0463544	0.0663888	0.0288769	0.0411195
9330102E08Rik	0	0	0.0253138	0.0416546	0.0104165	0.0186905	0.015384	0.0294863	0.00621114	0.00538355	0.0144922	0.00767256	0.0178562	0.0223445	0.017565	0.014084	0.01157	0.0141124	0.0103091	0.00722015	0.00771201
9330104G04Rik	0.0844068	0.069711	0.138794	0.124677	0.109158	0.0746969	0.0746559	0.0830145	0.0744653	0.0685869	0.0538043	0.0485742	0.0637324	0.0502582	0.0651985	0.0703645	0.0594691	0.0624594	0.0503796	0.0793391	0.0642232
9330121J05Rik	0	0	0.0379656	0	0	0.00467288	0.0109888	0.0053619	0.0155273	0.00269179	0.00621114	0.0204589	0.00510202	0	0.0050188	0	0	0.00403225	0.00458189	0.0036101	0
9330136K24Rik	0.0281653	0	0.0253138	0.0208318	0.0208318	0.0233624	0.0021978	0.0134044	0.00310559	0.0201871	0.0269119	0.0127874	0.0127548	0.011173	0.0125467	0.0281653	0.0148755	0.00604835	0.0114545	0.0108301	0.0154236
9330158H04Rik	0	0.0232537	0.151321	0.0208318	0.0884264	0.097974	0.0549174	0.194482	0.0682699	0.076641	0.0765298	0.109754	0.124677	0.0502582	0.133853	0.0844068	0.0792558	0.158608	0.0915103	0.0397008	0.0411195
9330159F19Rik	0.31853	0.230511	0.49813	0.443637	0.603347	0.489555	0.581972	0.527476	0.573612	0.486622	0.478432	0.549873	0.423455	0.600184	0.661995	0.533077	0.556027	0.464924	0.488883	0.32288	0.405267
9330160F10Rik	0.0703645	0.0464949	0.113679	0.0624594	0.103979	0.139732	0.10967	0.112364	0.142376	0.127514	0.103336	0.091942	0.0840846	0.0892669	0.0752114	0.103104	0.07596	0.0966238	0.102911	0.05052	0.0770446
9330161L09Rik	0	0	0	0	0	0	0.00439559	0.00804281	0.00931664	0.00538355	0.00207039	0.0153447	0.00765299	0.016759	0.00376411	0.00469482	0.00330578	0	0.00343642	0.0036101	0.00514137
9330171B17Rik	0	0	0.0126579	0	0.0416546	0.0233624	0.0307644	0.0294863	0.0217374	0.0201871	0.0144922	0.0153447	0.0153055	0.016759	0.00250941	0.00938953	0.00991719	0.0100805	0.0148906	0	0.0154236
9330179D12Rik	0	0	0.101094	0.0416546	0.0260387	0.116558	0.0636932	0.0402036	0.0744653	0.0349861	0.0538043	0.0792011	0.0586399	0.072562	0.0989601	0.0984325	0.042962	0.0463544	0.0400809	0.0108301	0.0436879
9330182L06Rik	0.0281653	0.0464949	0.151321	0.145321	0.109158	0.139732	0.172766	0.254613	0.123906	0.152836	0.119796	0.135138	0.0637324	0.111501	0.222746	0.186707	0.193825	0.17253	0.108607	0.0937255	0.0847315
9430015G10Rik	0	0.0464949	0.0758765	0.0416546	0.0624594	0.0560454	0.0856097	0.0749967	0.049669	0.0484333	0.0600054	0.074101	0.0509983	0.0502582	0.0889667	0.0328579	0.0660676	0.0483682	0.045803	0.0541252	0.0308434
9430037G07Rik	0	0.069711	0	0	0.0156244	0.00934566	0.015384	0.0187657	0.012422	0.00807528	0.00621114	0	0.00510202	0.00558656	0.0050188	0.014084	0.00826437	0.00604835	0.00801824	0.0036101	0.0128531
9430038I01Rik	0.0281653	0.139086	0.126247	0.165905	0.0936132	0.102624	0.111855	0.189217	0.105395	0.148844	0.0889097	0.0995796	0.106939	0.150272	0.13261	0.107772	0.148217	0.0906018	0.114299	0.05052	0.0872927
9430041J12Rik	0.0703645	0.0464949	0.063249	0	0.0208318	0.0420437	0.0351576	0.0241263	0.0248422	0.0242237	0.0186325	0.035798	0.0178562	0.0502582	0.048914	0.0375499	0.0330518	0.0120965	0.0263429	0.0036101	0.0308434
9430060I03Rik	0.0984325	0.0232537	0.0379656	0.0832372	0.206855	0.107271	0.135846	0.225954	0.194425	0.147513	0.138275	0.157911	0.0815423	0.0558369	0.0989601	0.060995	0.103945	0.114668	0.0994921	0.0397008	0.0744812
9430065F17Rik	0	0.0232537	0.0253138	0.0416546	0.0104165	0.046712	0.0175815	0.0214461	0.0279467	0.0309506	0.0372585	0.0204589	0.0127548	0.0390962	0.0301084	0.0187782	0.0132228	0.0161283	0.0148906	0.0324853	0.0102826
9430085M18Rik	0	0.0464949	0.0126579	0.0208318	0.0208318	0.00467288	0.0197789	0.0107237	0.00931664	0.00672942	0.00414077	0.00767256	0.00255102	0	0.00752816	0.014084	0.00991719	0.00806443	0.00458189	0.0036101	0
9430097D07Rik	0	0	0	0	0.0104165	0.00934566	0.0109888	0	0.012422	0.00672942	0.00621114	0.00511507	0.00510202	0.011173	0.0138013	0.014084	0.00495866	0.00403225	0.0114545	0	0.0102826
9530026P05Rik	0	0.0232537	0.0379656	0.0208318	0.0104165	0.0327045	0.0680793	0.0107237	0.0155273	0.0174957	0.0600054	0.0511286	0.00255102	0	0.0576844	0.023472	0.0413106	0.00604835	0.0206171	0.0108301	0.00257069
9530034E10Rik	0.0703645	0.0928896	0.0379656	0	0.0156244	0.0280337	0.0175815	0.0241263	0.0279467	0.0376761	0.0434646	0.0255727	0.0280575	0.0279293	0.0363784	0.0187782	0.0347038	0.0241912	0.0229075	0.05052	0.0128531
9530036O11Rik	0	0	0.113679	0.186418	0.0780457	0.0513793	0.0614997	0.0535936	0.077562	0.0820076	0.0538043	0.0460196	0.0255074	0.0614139	0.0276	0.00938953	0.00495866	0.0120965	0.0332127	0.00722015	0.046256
9530059O14Rik	0.0984325	2.76487	0.690614	0.536404	0.322505	0.404746	0.653567	0.727636	0.694389	0.493816	0.480286	0.341169	0.38102	0.731796	0.894619	0.625145	0.498148	0.686683	0.311108	0.33657	0.271709
9530068E07Rik	0.26451	0.2979	0.311399	0.481212	0.508987	0.502011	0.464441	0.616947	0.46728	0.508132	0.429717	0.447799	0.458279	0.42814	0.510752	0.474904	0.465635	0.411661	0.379165	0.22552	0.367025
9530077C05Rik	0.0703645	0.069711	0.126247	0.124677	0.160765	0.107271	0.12713	0.149576	0.142376	0.131518	0.144425	0.168006	0.0815423	0.072562	0.127633	0.112439	0.141674	0.158608	0.123398	0.0324853	0.112871
9530082P21Rik	0.0703645	0.139086	0.0506113	0.0416546	0.0780457	0.046712	0.0702718	0.0776699	0.0651712	0.0645581	0.0620719	0.0511286	0.0866263	0.105947	0.0827162	0.0656805	0.0594691	0.0745278	0.0709599	0.0360932	0.0616576
9630001P10Rik	0	0	0	0	0.0104165	0	0.0131864	0.0187657	0.00310559	0.00942113	0.0144922	0.00767256	0	0.00558656	0.0313625	0	0.00826437	0.0100805	0.00572735	0.0108301	0
9930012K11Rik	0.014084	0.0232537	0.0253138	0.0624594	0.0156244	0.0420437	0.0329611	0.0294863	0.046567	0.0242237	0.0227724	0.0179019	0.0306075	0.0446779	0.042647	0.042241	0.0479155	0.0463544	0.028633	0	0.0128531
9930021J03Rik	0.632941	0.139086	0.429693	0.625145	0.527305	0.481212	0.55179	0.589859	0.557608	0.457615	0.517028	0.466294	0.541955	0.537925	0.531683	0.406548	0.471582	0.389286	0.391949	0.260579	0.463901
9930104L06Rik	0.0703645	0.0232537	0.063249	0.0416546	0.0987975	0.0513793	0.0746559	0.101701	0.0651712	0.0712721	0.0847845	0.0689989	0.0688232	0.0837011	0.0752114	0.0656805	0.0545184	0.0604471	0.0526675	0.0613334	0.0436879
A030001D20Rik	0.140384	0.116019	0.138794	0.267627	0.252516	0.144358	0.172766	0.24161	0.151593	0.158155	0.257998	0.2257	0.187672	0.210727	0.265381	0.182091	0.174322	0.206197	0.126808	0.0793391	0.151095
A130010J15Rik	0.112439	0.116019	0.063249	0.103979	0.103979	0.0607104	0.0658864	0.0830145	0.083753	0.0793246	0.0868473	0.091942	0.0611863	0.0279293	0.105201	0.060995	0.105589	0.0463544	0.0766717	0.0829374	0.0488238
A230005M16Rik	0.014084	0	0.0126579	0	0.0104165	0	0.0131864	0.0241263	0.00931664	0.00807528	0.012422	0.00255754	0.00510202	0.016759	0.0050188	0.023472	0.00661152	0.0161283	0.0114545	0.00722015	0.0128531
A230006K03Rik	0.0281653	0.0928896	0.287176	0.32745	0.267627	0.263302	0.355126	0.298497	0.323519	0.304814	0.299835	0.180602	0.284415	0.227093	0.348014	0.436692	0.256676	0.261135	0.221551	0.0901306	0.221827
A230050P20Rik	0.331901	0.814044	0.520483	0.554481	0.590144	0.571228	0.666118	0.645845	0.633738	0.688565	0.623422	0.653295	0.60737	0.576475	0.614325	0.581665	0.638391	0.607163	0.605019	0.333153	0.59205
A230057D06Rik	0.154316	0.449795	0.213563	0.206855	0.32745	0.281321	0.298829	0.275329	0.239927	0.2216	0.257998	0.257998	0.212679	0.329216	0.225193	0.322993	0.232607	0.198295	0.231601	0.111681	0.239353
A230060F14Rik	0	0	0	0.0208318	0.0104165	0	0	0.00804281	0.00310559	0.00538355	0.00828148	0.00511507	0.00255102	0.011173	0.0050188	0	0.00330578	0.0100805	0.00458189	0.00722015	0.00257069
A230065N10Rik	0	0	0	0.0208318	0.0260387	0.00467288	0.00439559	0.0160851	0	0.00672942	0.00414077	0.00767256	0.00510202	0.011173	0.00752816	0.00469482	0.00826437	0.00403225	0.00572735	0	0.00771201
A230072E10Rik	0.0281653	0	0.0506113	0.0832372	0.0260387	0.0607104	0.0505279	0.0482387	0.058972	0.0470889	0.0289815	0.0434646	0.0611863	0.011173	0.0363784	0.042241	0.0347038	0.0262067	0.029778	0.0252681	0.0488238
A230077H06Rik	0	0.0232537	0.0126579	0.0208318	0.0260387	0.0140182	0.0109888	0.0187657	0.00621114	0.00672942	0.0103518	0.0306857	0.00510202	0.016759	0.0413934	0.0281653	0.0181808	0.0100805	0.0114545	0.0144399	0.00771201
A230083G16Rik	0	0.0464949	0.0126579	0	0.0208318	0.00467288	0.0131864	0.0187657	0.00310559	0.0148043	0.00621114	0.01023	0.0204067	0.0223445	0.00878282	0.014084	0.00495866	0.00806443	0.00114548	0.0036101	0.0179939
A230087F16Rik	0.0703645	0.0464949	0.151321	0.145321	0.242411	0.121198	0.241599	0.264985	0.251983	0.209764	0.125961	0.0511286	0.167582	0.150272	0.145037	0.117103	0.167806	0.142661	0.144967	0.0541252	0.0821697
A230107N01Rik	0.042241	0	0	0	0.00520831	0.00934566	0.0087911	0.0268064	0.0155273	0.00538355	0.0207025	0.0255727	0.00765299	0	0.0200739	0.00938953	0.00826437	0.0100805	0.0171813	0.0108301	0.0102826
A2ml1	0.112439	0.976681	1.23955	0.287682	0.272651	0.626441	0.398185	0.204996	0.200517	0.143518	0.103336	0.275282	0.129738	0.144745	0.187112	0.0984325	0.149852	0.128677	0.351265	0.745024	0.130733
A330008L17Rik	0	0.0464949	0.0253138	0.0416546	0.124677	0.0886688	0.0614997	0.0241263	0.0558715	0.0242237	0.0620719	0.0127874	0.0815423	0.011173	0.0163104	0.00938953	0.0479155	0.0423261	0.0194719	0.0108301	0.0436879
A330009N23Rik	0.16822	0.0232537	0.201172	0.0624594	0.0884264	0.0560454	0.0549174	0.0696488	0.071368	0.0551537	0.0600054	0.0434646	0.0178562	0.0502582	0.042647	0.0937593	0.039659	0.0342675	0.0641027	0.021659	0.035982
A330041J22Rik	0	0	0.0758765	0.0832372	0.0624594	0.0700362	0.0899884	0.107034	0.108483	0.0591848	0.101276	0.0970344	0.066278	0.10039	0.0814657	0.0563083	0.0710147	0.0544086	0.045803	0.0144399	0.0719174
A330048O09Rik	0.014084	0	0	0.0208318	0.0156244	0.00467288	0.015384	0.00804281	0.0310509	0.0201871	0.0227724	0.0127874	0.0102039	0	0.00627348	0.00469482	0.00165289	0.00806443	0.00916367	0.0108301	0.00514137
A330069E16Rik	0.112439	0.669729	1.00947	0.366725	0.554481	0.67624	0.630015	0.650249	0.651649	0.610152	0.647401	0.556505	0.185165	0.297278	0.506319	0.605508	0.224554	0.284455	0.567056	0.32288	0.419467
A330070K13Rik	0	0	0	0.0208318	0.00520831	0.00934566	0.0131864	0.00804281	0.012422	0.00672942	0	0.00255754	0.00255102	0	0.0100375	0.0187782	0.00495866	0.00806443	0.00458189	0.021659	0.00514137
A330074K22Rik	0	0	0.0379656	0	0.0156244	0.00467288	0.0285675	0.032166	0.0341548	0.0269147	0.012422	0.0127874	0.0255074	0.011173	0.0413934	0.023472	0.0247908	0.0221756	0.0240527	0.00722015	0.0179939
A330076C08Rik	0	0.0928896	0.0506113	0	0.00520831	0.0280337	0.0109888	0.0107237	0.0155273	0.00942113	0.012422	0.0204589	0.0127548	0	0.0125467	0.0328579	0.0247908	0.00806443	0.00916367	0.0108301	0.0102826
A330084C13Rik	0	0.0232537	0.0126579	0.0208318	0.0260387	0.0233624	0.0702718	0.0294863	0.0217374	0.01615	0.0517368	0.0409093	0.0153055	0.011173	0.0225828	0.0328579	0.01157	0.00604835	0.0148906	0.0036101	0.0102826
A330094K24Rik	0	0	0.0253138	0.0208318	0	0	0.0109888	0.00268096	0.00310559	0.00134589	0.00207039	0	0.0127548	0	0.0050188	0.00469482	0.00495866	0.00201613	0.00343642	0	0.00257069
A330102I10Rik	0.0703645	0.230511	0.1763	0.103979	0.0468579	0.130471	0.0197789	0.0803425	0.185274	0.0618717	0.0703354	0.127531	0.0535458	0.17233	0.042647	0.0281653	0.0446133	0.0423261	0.082381	0.0649363	0.135829
A430005L14Rik	0.291624	0.139086	0.670206	0.499768	0.567931	0.455995	0.557484	0.546165	0.626006	0.483017	0.585089	0.569702	0.472066	0.557294	0.562143	0.565602	0.535954	0.455824	0.53734	0.204351	0.419467
A430027H14Rik	0.042241	0.116019	0.126247	0.0416546	0.0780457	0.0793559	0.120587	0.0509163	0.0620719	0.0605283	0.0662042	0.119917	0.0866263	0.072562	0.0802151	0.107772	0.113804	0.0966238	0.101772	0.0397008	0.10776
A430033K04Rik	0.0281653	0.069711	0.0506113	0.145321	0.145321	0.0886688	0.0943654	0.0616232	0.0744653	0.0967534	0.099216	0.109754	0.112011	0.122598	0.126388	0.0797277	0.094076	0.080558	0.082381	0.0397008	0.0847315
A430046D13Rik	0.0563083	0.0928896	0.0758765	0.103979	0.0624594	0.139732	0.0856097	0.101701	0.11157	0.0820076	0.0806579	0.091942	0.0942482	0.111501	0.0827162	0.0844068	0.0874916	0.080558	0.0675317	0.0433078	0.0770446
A430057M04Rik	0	0	0	0	0.00520831	0.00467288	0.0109888	0.00804281	0.00621114	0.00269179	0.00414077	0.00255754	0.0127548	0	0.0100375	0.00469482	0.0148755	0.00403225	0.00458189	0	0.00257069
A430078I02Rik	0	0	0.0253138	0	0.0208318	0.00467288	0.0131864	0.0241263	0.00931664	0.00942113	0.0144922	0.01023	0	0.011173	0.00627348	0.00938953	0.00991719	0.00403225	0.0068728	0.0144399	0.0102826
A430105I19Rik	0.014084	0	0	0.0208318	0.0104165	0.0186905	0.0241735	0.0214461	0.0310509	0.0134585	0.0207025	0.00255754	0.0102039	0.0390962	0.00752816	0	0.01157	0.00604835	0.0068728	0.021659	0.0205641
A430105J06Rik	0	0.0232537	0.0126579	0.0624594	0.0364503	0.0140182	0.0197789	0.0241263	0.012422	0.0201871	0.0269119	0.0306857	0.0229572	0.016759	0.0276	0.0328579	0.0231384	0.0181442	0.0183266	0.00722015	0.0282739
A430106G13Rik	0	0.0928896	0.0506113	0	0.0156244	0.0186905	0.0109888	0.00804281	0.0279467	0.00672942	0.00828148	0.00511507	0.00255102	0.00558656	0.0100375	0.00938953	0.0148755	0.00604835	0.0114545	0.00722015	0.0102826
A530017D24Rik	0.0984325	0.0464949	0.0253138	0.186418	0.0676567	0.153601	0.0856097	0.123014	0.102306	0.0940738	0.0806579	0.0689989	0.0866263	0.111501	0.0664505	0.089084	0.0891381	0.0644715	0.0583861	0.104503	0.0898533
A630072M18Rik	0.0281653	0.116019	0.0506113	0.0208318	0.0260387	0.0233624	0.0109888	0.032166	0.0279467	0.0309506	0.0558715	0.0383538	0.0331572	0.0502582	0.0664505	0.0469311	0.039659	0.0241912	0.0355023	0.0324853	0.0257041
A630089N07Rik	0.0563083	0.0232537	0.0126579	0	0.0364503	0.0140182	0.015384	0.0187657	0.0155273	0.01615	0.0227724	0.0179019	0.0102039	0.0223445	0.0125467	0.0187782	0.0148755	0.0120965	0.0229075	0.0469142	0.0205641
A730017C20Rik	0.84097	0.814044	1.14824	0.953147	1.43663	1.08073	1.28793	1.56395	1.29861	1.47275	1.31739	1.35069	1.06028	1.07947	1.36581	1.07012	1.38445	1.25793	1.38474	0.972744	1.27139
A730046J19Rik	0	0	0	0	0.0416546	0.00934566	0.0790386	0.115028	0.00621114	0.0403659	0.0476011	0.0204589	0.00255102	0	0.0276	0.0516203	0.00330578	0.0161283	0.00572735	0.0036101	0.00257069
A730049H05Rik	0	0	0	0	0.0104165	0.00467288	0.0021978	0	0	0	0.0434646	0.00511507	0	0.00558656	0.0012547	0	0	0.00201613	0.00229095	0.0288769	0
A730056A06Rik	0	0.0464949	0	0	0.00520831	0.0373745	0	0	0.00931664	0.00538355	0.00207039	0	0.00255102	0.00558656	0.0163104	0.0328579	0.00991719	0.00201613	0.0137453	0.0036101	0.0385509
A730060N03Rik	0	0	0.0379656	0.0832372	0.0156244	0.0420437	0.0329611	0.0214461	0.0186325	0.0363312	0.0310509	0.0179019	0.0637324	0.0614139	0.0213284	0.014084	0.0198334	0.0221756	0.0251978	0.0397008	0.0257041
A730063M14Rik	0.014084	0	0.0379656	0	0.0676567	0.0280337	0.0351576	0.0268064	0.0341548	0.0296054	0.049669	0.0485742	0.0229572	0.0279293	0.0576844	0.0187782	0.0594691	0.0322525	0.029778	0.0252681	0.0231342
A730071L15Rik	0.014084	0.0232537	0	0	0.0104165	0.00934566	0.0197789	0.0160851	0.012422	0.00942113	0.0207025	0.00767256	0.00765299	0.00558656	0.0100375	0.00938953	0.0181808	0.0141124	0.016036	0.0036101	0.00514137
A730081D07Rik	0.014084	0.0464949	0.0506113	0.0208318	0.0104165	0.0233624	0.0197789	0.0428823	0.0434646	0.0255692	0.00414077	0.01023	0.0280575	0.0335133	0.0112921	0.014084	0.0247908	0.0342675	0.0229075	0.0252681	0.0282739
A730098A19Rik	0	0	0.0506113	0.0416546	0.0676567	0.046712	0.0395501	0.0402036	0.0527705	0.0538098	0.0682699	0.0817503	0.0739123	0.0390962	0.0639464	0.060995	0.042962	0.0181442	0.0469472	0.0360932	0.0436879
A830005F24Rik	0	0	0	0.0416546	0.0208318	0.0140182	0.0109888	0.0348455	0.0155273	0.0121128	0.0207025	0.00767256	0.0153055	0.011173	0.0225828	0	0.00991719	0.0100805	0.0125999	0.0180496	0.0102826
A830010M20Rik	0.154316	0.139086	0.323445	0.347152	0.332387	0.400428	0.328145	0.416783	0.299835	0.370975	0.341169	0.319352	0.354757	0.334509	0.378595	0.376051	0.321695	0.282517	0.314383	0.264068	0.219317
A830011K09Rik	0	0	0.0126579	0	0.0208318	0.00467288	0.0417461	0.00268096	0.00931664	0.0228782	0.0393273	0.0485742	0.00510202	0.0223445	0.0351245	0.0469311	0.00495866	0.0100805	0.0171813	0.021659	0
A830018L16Rik	0.042241	0.342124	0.628652	0.347152	0.337317	0.352469	0.381861	0.162819	0.163862	0.174086	0.166926	0.142737	0.154991	0.355587	0.626884	0.291624	0.158019	0.383663	0.237175	0.15105	0.362208
A830029E22Rik	0	0	0	0	0	0	0.00439559	0.0160851	0.00621114	0.00134589	0	0.00255754	0.00510202	0.011173	0.00878282	0.00469482	0.0148755	0.00201613	0.00114548	0.00722015	0
A830035O19Rik	0	0.0464949	0.0126579	0.0208318	0.0156244	0.00934566	0.0131864	0.00804281	0.0248422	0.010767	0.012422	0.0179019	0.0178562	0	0.00878282	0.0187782	0.0132228	0.00806443	0.0114545	0.0108301	0.0128531
A830052D11Rik	0	0	0.0379656	0.0208318	0.0156244	0.0327045	0.0351576	0.0241263	0.0155273	0.0188414	0.0372585	0.033242	0.0204067	0.011173	0.0326166	0.0375499	0.0297477	0.0141124	0.0240527	0.00722015	0.0179939
A830082K12Rik	0.0563083	0	0.163823	0.836482	0.395832	0.321534	0.151073	0.168108	0.173048	0.0201871	0.301815	0.424478	0.144901	0.0502582	0.0413934	0.121765	0.021486	0.0181442	0.0994921	0.0649363	0.0385509
A830092H15Rik	0.014084	0	0.101094	0.0416546	0.103979	0.102624	0.215901	0.170751	0.058972	0.0913936	0.136224	0.130068	0.0764561	0.13368	0.158681	0.195927	0.112161	0.106653	0.0800976	0.0397008	0.0411195
A930003A15Rik	0	0	0	0	0.0156244	0.00467288	0.00439559	0.00268096	0	0.00269179	0.00414077	0.00767256	0	0.00558656	0.00627348	0.00469482	0.00991719	0.00201613	0.00458189	0	0.0102826
A930003O13Rik	0.0281653	0	0.0253138	0.0416546	0.0156244	0.00467288	0.0131864	0.00804281	0.012422	0.01615	0.0144922	0.0179019	0.0178562	0.016759	0.042647	0.023472	0.0148755	0.0262067	0.0183266	0.0108301	0.0102826
A930004D18Rik	0	0.0232537	0	0.0208318	0.00520831	0.0233624	0.0307644	0.0241263	0.0279467	0.0296054	0.0289815	0.0153447	0.0459022	0.016759	0.0301084	0.0187782	0.0280955	0.0322525	0.0274879	0.0252681	0.0334128
A930012L18Rik	0	0.0232537	0.0379656	0	0.0156244	0.00934566	0.0241735	0.00804281	0.0155273	0.0255692	0.0103518	0.01023	0.0229572	0.00558656	0.017565	0.023472	0.0165282	0.0262067	0.029778	0.0108301	0.0257041
A930015D03Rik	0	0.069711	0.0253138	0	0.0104165	0.00934566	0.0351576	0.0187657	0.0310509	0.0188414	0.0165624	0.0204589	0.0153055	0.0279293	0.0288542	0.0281653	0.0181808	0.0241912	0.0114545	0.0108301	0.0102826
A930016O22Rik	0	0	0.0126579	0	0.00520831	0.00934566	0.0109888	0.00268096	0.00621114	0.00538355	0.00414077	0.00255754	0.0178562	0.00558656	0.0163104	0.0187782	0.0181808	0.00604835	0.0148906	0.00722015	0.00257069
A930024E05Rik	0.0563083	0	0.0126579	0	0.0208318	0.0186905	0.015384	0.0107237	0.00931664	0.0134585	0.012422	0.00767256	0.0127548	0.00558656	0.0150559	0.00938953	0.0148755	0.0181442	0.0137453	0.0036101	0.0154236
A930024N18Rik	0	0	0.0126579	0	0.0156244	0.0140182	0.0131864	0.0107237	0.00310559	0.0121128	0.00621114	0.00511507	0.00765299	0.0223445	0.00878282	0.014084	0.00826437	0.00403225	0.0125999	0.00722015	0.00514137
A930029G22Rik	0	0.0464949	0.0253138	0.0416546	0.0520598	0.0700362	0.0439419	0.0696488	0.046567	0.0390211	0.0455329	0.0409093	0.0306075	0.0335133	0.0326166	0.00938953	0.0313998	0.0221756	0.028633	0.00722015	0.0436879
A930033H14Rik	0	0.069711	0.0126579	0.0624594	0.0260387	0.0420437	0.0263706	0.032166	0.0186325	0.0390211	0.0227724	0.0255727	0.0306075	0.0614139	0.0326166	0.0328579	0.0264432	0.0262067	0.0355023	0.0108301	0.0385509
AA986860	0	0	0.0253138	0.0208318	0	0.0140182	0.00659336	0.00804281	0.00310559	0.0174957	0.00414077	0.0153447	0.0127548	0.00558656	0.0163104	0	0.00991719	0.0120965	0.0125999	0.0036101	0.0102826
Aaas	0.014084	0	0.0126579	0.0208318	0.0260387	0.0233624	0.0219763	0.0294863	0.0341548	0.0309506	0.049669	0.0409093	0.0357067	0.0223445	0.0250915	0.0187782	0.039659	0.0282221	0.0320678	0.0613334	0.0205641
Aacs	0.0281653	0.18499	0.138794	0.0416546	0.103979	0.065374	0.146726	0.123014	0.120824	0.0712721	0.119796	0.091942	0.129738	0.144745	0.137583	0.13108	0.107232	0.0785482	0.0972122	0.0793391	0.0847315
Aaed1	0.014084	0.0464949	0.138794	0.145321	0.191535	0.102624	0.215901	0.178672	0.160797	0.1195	0.134173	0.0842991	0.172611	0.183329	0.140069	0.121765	0.135126	0.124677	0.12908	0.13318	0.151095
Aagab	0.16822	0	0.201172	0.227207	0.109158	0.125836	0.161929	0.152226	0.114655	0.126179	0.136224	0.142737	0.106939	0.139215	0.193274	0.121765	0.148217	0.124677	0.11316	0.115268	0.0796074
Aak1	0.561565	0.725388	0.73069	0.805767	0.770444	0.753692	0.868886	0.856513	0.788415	0.815156	0.738478	0.692636	0.695187	0.791745	0.73306	0.834125	0.656049	0.576417	0.705245	0.676458	0.693661
Aamdc	0.609452	0.0928896	0.817311	0.910532	0.65948	0.778696	0.717148	0.712868	0.699347	0.663548	0.712495	0.760777	0.87414	0.692029	0.813244	0.667602	0.664138	0.66222	0.678652	0.617117	0.697768
Aamp	1.25939	0.761461	1.08076	1.08605	1.06054	1.12817	1.00892	1.0218	0.887946	0.925403	1.04792	1.09194	0.995564	0.927992	0.988866	0.920655	1.07391	1.03239	0.943162	1.19976	1.0097
Aar2	0.126424	0.0464949	0.163823	0.145321	0.160765	0.144358	0.185743	0.170751	0.169988	0.126179	0.166926	0.160436	0.175124	0.194306	0.141311	0.182091	0.128571	0.142661	0.12908	0.0685384	0.110316
Aard	0.042241	0.0464949	0.163823	0.0624594	0.160765	0.468638	0.1053	0.154876	0.18222	0.18865	0.164883	0.152857	0.132267	0.433246	0.173532	0.309585	0.628809	0.464924	0.266037	0.0649363	0.241851
Aars	0.35847	0.2979	0.45273	0.642396	0.371597	0.522612	0.43254	0.4413	0.404987	0.42578	0.370357	0.355628	0.446727	0.493669	0.350378	0.466467	0.334238	0.330636	0.365249	0.363765	0.383822
Aars2	0.140384	0.18499	0.0506113	0.0416546	0.0987975	0.0560454	0.0702718	0.072323	0.114655	0.0497776	0.0579386	0.0587897	0.0739123	0.072562	0.0764625	0.0844068	0.0825508	0.0503819	0.0595296	0.0685384	0.046256
Aarsd1	0.0703645	0.0928896	0.126247	0.103979	0.103979	0.121198	0.0921771	0.0936966	0.108483	0.0887127	0.113627	0.117377	0.0789994	0.0892669	0.0952137	0.103104	0.0924303	0.0845766	0.0858053	0.021659	0.10009
Aasdh	0.042241	0.0232537	0.0253138	0.0832372	0.0624594	0.0420437	0.0329611	0.032166	0.046567	0.0363312	0.0558715	0.0587897	0.0178562	0.0390962	0.0276	0.060995	0.0363556	0.0201599	0.029778	0.021659	0.0179939
Aasdhppt	0.182091	0	0.418092	0.267627	0.165905	0.249733	0.241599	0.246816	0.20356	0.222914	0.255994	0.230685	0.274597	0.210727	0.311141	0.278092	0.269455	0.265032	0.231601	0.175985	0.224335
Aatf	0.16822	0.0464949	0.0758765	0.0208318	0.0832372	0.0420437	0.0768474	0.0803425	0.0806579	0.112816	0.0703354	0.0970344	0.0815423	0.111501	0.0864669	0.060995	0.0627687	0.0926095	0.0994921	0.0793391	0.135829
Aatk	0.305103	0.364001	0.531572	0.642396	0.646683	0.518508	0.600598	0.708624	0.613046	0.588574	0.491374	0.452436	0.526374	0.552469	0.454685	0.541258	0.492272	0.422776	0.427836	0.40074	0.431239
AB041806	0.042241	0.0232537	0.0253138	0.103979	0.0520598	0.0327045	0.0395501	0.0749967	0.0558715	0.0484333	0.0269119	0.0383538	0.0637324	0.0892669	0.0388861	0.042241	0.042962	0.0362824	0.0503796	0.0144399	0.0616576
Abat	0.371666	0.139086	0.542601	0.96706	0.633791	0.764458	0.751435	0.704369	0.584209	0.651453	0.717399	0.863173	0.761097	0.8126	0.664039	0.553467	0.616414	0.538161	0.676802	0.430612	0.75618
Abca1	0.042241	0	0.0379656	0.0416546	0.0208318	0.0560454	0.0109888	0.032166	0.0279467	0.0255692	0.0289815	0.0255727	0.00510202	0.011173	0.0313625	0.00938953	0.0181808	0.0141124	0.0206171	0.0360932	0.0744812
Abca2	0.250881	0.65076	0.49813	0.709731	0.66796	0.555154	0.651766	0.754706	0.506071	0.56212	0.46728	0.431497	0.383395	0.508524	0.58575	0.58566	0.535954	0.426471	0.450785	0.387352	0.393375
Abca3	0.042241	0.320088	0.371166	0.347152	0.352057	0.348069	0.381861	0.334225	0.34703	0.340616	0.27798	0.253045	0.262288	0.183329	0.220297	0.26451	0.216487	0.221963	0.233831	0.154618	0.23185
Abca5	0.140384	0.2979	0.382974	0.366725	0.438898	0.374371	0.309329	0.367038	0.267003	0.329152	0.24596	0.238152	0.369112	0.407613	0.441022	0.402213	0.351401	0.288327	0.299073	0.140333	0.289019
Abca7	0.042241	0.572809	0.0506113	0.0416546	0.0208318	0.097974	0.0702718	0.0428823	0.0372585	0.0430553	0.0372585	0.033242	0.0484504	0.0614139	0.0576844	0.0281653	0.0313998	0.0282221	0.029778	0.0757398	0.0205641
Abca8b	0.014084	0.0928896	0.0126579	0.0832372	0.0728522	0.046712	0.0329611	0.0509163	0.0310509	0.0309506	0.041396	0.033242	0.040805	0.0335133	0.0626942	0.0516203	0.057819	0.0523954	0.0320678	0.0144399	0.0231342
Abcb10	0.0563083	0.0928896	0.262788	0.124677	0.155621	0.190436	0.19869	0.239005	0.160797	0.183358	0.16284	0.137672	0.137323	0.150272	0.215395	0.191319	0.227777	0.132675	0.144967	0.143907	0.184049
Abcb1b	0	0	0	0	0.0156244	0.00467288	0.0197789	0.0134044	0.0155273	0.0148043	0.00828148	0.0127874	0.00510202	0.011173	0.00878282	0.023472	0.00661152	0.00403225	0.0137453	0.0036101	0.0128531
Abcb4	0.0281653	0.0232537	0.0253138	0.0208318	0.0312449	0.00934566	0.0175815	0.00804281	0.0186325	0.00942113	0.0186325	0.0127874	0.0127548	0.016759	0.00250941	0	0	0.00604835	0.0114545	0.00722015	0.0128531
Abcb6	0.014084	0.069711	0.0884921	0	0.0572604	0.065374	0.0549174	0.072323	0.0620719	0.0390211	0.0538043	0.0409093	0.038256	0.0279293	0.0514202	0.0516203	0.0479155	0.0302373	0.0515236	0.0144399	0.0308434
Abcb7	0.0281653	0.0464949	0.1763	0.267627	0.160765	0.148981	0.19869	0.275329	0.123906	0.170107	0.142376	0.140205	0.180146	0.194306	0.177239	0.177471	0.149852	0.0765382	0.144967	0.165311	0.14601
Abcb8	0.154316	0.16208	0.0884921	0.0832372	0.186418	0.17665	0.172766	0.212866	0.173048	0.189972	0.146474	0.168006	0.16003	0.139215	0.133853	0.237206	0.159651	0.116671	0.163079	0.122438	0.123082
Abcb9	0.014084	0.207804	0.1763	0.206855	0.135006	0.144358	0.161929	0.186583	0.169988	0.126179	0.119796	0.109754	0.066278	0.194306	0.135097	0.145031	0.141674	0.102642	0.115436	0.0757398	0.0949728
Abcc1	0	0	0.0884921	0.0624594	0.0987975	0.0607104	0.0790386	0.0936966	0.0651712	0.0645581	0.0662042	0.0842991	0.0433538	0.0502582	0.0664505	0.0516203	0.0462645	0.0382971	0.0629595	0.0613334	0.046256
Abcc10	0.014084	0.139086	0.0758765	0.165905	0.0987975	0.0513793	0.133668	0.128334	0.0899408	0.0699295	0.0372585	0.0587897	0.0433538	0.0446779	0.0877168	0.0937593	0.0973667	0.0664833	0.0526675	0.0469142	0.0385509
Abcc5	0.223487	0.68849	0.486866	0.572395	0.540939	0.434771	0.615366	0.614705	0.570954	0.522353	0.613046	0.538771	0.411737	0.448499	0.49073	0.453752	0.506933	0.413517	0.482748	0.260579	0.447626
Abcc8	0	0.2979	0.0506113	0.0416546	0.0416546	0.0840133	0.0219763	0.0294863	0.0434646	0.0269147	0.0207025	0.0153447	0.0255074	0.0446779	0.0363784	0.0797277	0.0512173	0.0362824	0.0400809	0.0108301	0.035982
Abcc9	0	0.0464949	0	0	0	0	0	0	0.00310559	0.00269179	0.00414077	0.00511507	0	0	0.0012547	0	0.00165289	0.0564217	0.00114548	0	0.00257069
Abcd1	0.042241	0.230511	0.0379656	0	0.0780457	0.0280337	0.0505279	0.0589471	0.0403617	0.0430553	0.0351894	0.0434646	0.0280575	0.0279293	0.0476607	0.0516203	0.057819	0.0362824	0.0412254	0.021659	0.0411195
Abcd2	0.0281653	0.069711	0.0506113	0.0416546	0.0364503	0.0560454	0.0351576	0.0107237	0.0279467	0.0174957	0.0331202	0.01023	0.0127548	0.016759	0.0276	0.023472	0.0280955	0.0262067	0.0377917	0.0324853	0.0179939
Abcd3	0.223487	0.207804	0.238246	0.307625	0.381317	0.378731	0.381861	0.31641	0.338234	0.331703	0.309724	0.2257	0.313707	0.313286	0.421533	0.309585	0.342051	0.282517	0.285895	0.295327	0.234353
Abcd4	0.16822	0.449795	0.138794	0.186418	0.150473	0.158218	0.111855	0.173393	0.142376	0.128849	0.0889097	0.074101	0.0917081	0.139215	0.188345	0.27357	0.208405	0.112665	0.0903695	0.100912	0.130733
Abce1	0.250881	0.320088	0.359307	0.366725	0.405465	0.321534	0.363379	0.34436	0.272994	0.317646	0.323519	0.255522	0.257354	0.275819	0.313533	0.296123	0.32954	0.251376	0.233831	0.172429	0.293949
Abcf1	0.597594	0.230511	0.49813	0.607727	0.453088	0.717269	0.59317	0.564682	0.589485	0.517623	0.498735	0.514133	0.620186	0.600184	0.625841	0.541258	0.543146	0.559119	0.445589	0.476363	0.50067
Abcf2	0.423818	0.0928896	0.250535	0.366725	0.292679	0.36125	0.342703	0.306185	0.248973	0.285474	0.281963	0.324213	0.325836	0.313286	0.297956	0.362876	0.27901	0.22393	0.283694	0.239579	0.323383
Abcf3	0.384799	0.342124	0.311399	0.405465	0.312593	0.294778	0.355126	0.34436	0.305772	0.304814	0.309724	0.253045	0.369112	0.318605	0.291946	0.300616	0.32954	0.263084	0.286995	0.221999	0.291485
Abcg1	0.31853	0.116019	0.287176	0.405465	0.307625	0.33483	0.317705	0.293361	0.272994	0.259526	0.313672	0.267884	0.306407	0.318605	0.376254	0.255429	0.245462	0.241595	0.2483	0.197274	0.261781
Abcg2	0.0281653	0.116019	0.0379656	0	0.0416546	0.0513793	0.0527228	0.0482387	0.0248422	0.0242237	0.0331202	0.0460196	0.056093	0.0558369	0.0852168	0.042241	0.100656	0.0584345	0.0400809	0.0360932	0.0257041
Abcg4	0.140384	0.0928896	0.225921	0.405465	0.262597	0.245199	0.284076	0.349415	0.251983	0.253012	0.249976	0.240638	0.222646	0.259643	0.269015	0.282608	0.27742	0.184436	0.190147	0.12602	0.204233
Abhd10	0.331901	0.320088	0.151321	0.267627	0.297668	0.281321	0.235188	0.318961	0.239927	0.229475	0.239927	0.230685	0.281963	0.221644	0.238632	0.186707	0.219716	0.178486	0.192396	0.15105	0.196673
Abhd11	0.35847	0.552806	0.49813	0.443637	0.585722	0.526708	0.540351	0.496744	0.527928	0.524714	0.366482	0.312047	0.49032	0.443426	0.489613	0.462236	0.548881	0.5539	0.42469	0.370525	0.345283
Abhd12	1.04979	0.761461	1.12615	1.30504	1.08289	1.14448	1.07241	1.08838	1.14015	1.02233	0.921777	0.946729	1.00218	1.21169	0.928481	1.05854	0.963073	1.03366	1.04024	1.1363	1.09913
Abhd13	0.126424	0.0232537	0.0758765	0.145321	0.0987975	0.102624	0.120587	0.123014	0.0961252	0.110141	0.078594	0.0842991	0.0866263	0.0948299	0.0989601	0.107772	0.0907843	0.0523954	0.0880876	0.0973192	0.0744812
Abhd14a	0.154316	0.207804	0.359307	0.347152	0.32745	0.294778	0.404281	0.32151	0.332357	0.311236	0.32745	0.374795	0.299092	0.402455	0.459222	0.34964	0.45818	0.452175	0.420489	0.298784	0.284081
Abhd14b	0.0703645	0.5326	0.151321	0.227207	0.119507	0.121198	0.138023	0.144271	0.11774	0.124844	0.158753	0.185633	0.104402	0.161311	0.173532	0.126424	0.156387	0.152632	0.138163	0.111681	0.10776
Abhd15	0	0	0	0	0.0260387	0	0.0109888	0.0187657	0.00310559	0.0121128	0.00207039	0	0.00255102	0	0.00376411	0.00938953	0.00165289	0	0	0.00722015	0
Abhd16a	0.621235	0.320088	0.3474	0.481212	0.366725	0.352469	0.363379	0.34436	0.402118	0.312519	0.370357	0.338752	0.286866	0.345067	0.344465	0.31406	0.397698	0.33827	0.328537	0.505297	0.388603
Abhd17a	0.35847	0.253103	0.863358	0.625145	0.567931	0.709885	0.637295	0.665577	0.615646	0.542334	0.630306	0.636459	0.559616	0.528171	0.67422	0.788843	0.578721	0.527599	0.628953	0.479597	0.567943
Abhd17b	0.140384	0.139086	0.201172	0.206855	0.262597	0.23157	0.25439	0.239005	0.194425	0.251708	0.233887	0.175567	0.13985	0.232536	0.294351	0.246328	0.247066	0.208171	0.183392	0.243086	0.204233
Abhd17c	0	0.0464949	0.0758765	0.186418	0.160765	0.121198	0.12931	0.13365	0.139301	0.0913936	0.177126	0.150328	0.124677	0.0837011	0.231307	0.140384	0.230998	0.120675	0.141566	0.111681	0.105204
Abhd18	0.250881	0.449795	0.371166	0.186418	0.410268	0.356863	0.353059	0.336762	0.275986	0.297091	0.319584	0.353223	0.262288	0.323915	0.344465	0.34964	0.331107	0.29799	0.274876	0.154618	0.31115
Abhd2	0.223487	0.65076	0.101094	0.165905	0.129843	0.0700362	0.116222	0.146924	0.114655	0.130184	0.11774	0.119917	0.122145	0.10039	0.173532	0.107772	0.182457	0.0865853	0.106329	0.469882	0.143466
Abhd3	0.182091	0.230511	0.0506113	0.124677	0.0468579	0.135103	0.0549174	0.0776699	0.0310509	0.0846901	0.0641382	0.0689989	0.0993264	0.0614139	0.0476607	0.0516203	0.0627687	0.0302373	0.045803	0.0721396	0.0436879
Abhd4	0.0703645	0.0464949	0.0379656	0	0.0936132	0.065374	0.0417461	0.0963655	0.0682699	0.0511217	0.0827214	0.0460196	0.0204067	0.0390962	0.0564318	0.0750469	0.0693658	0.0423261	0.0343575	0.0685384	0.0308434
Abhd5	0.042241	0	0.0126579	0	0.0260387	0.0233624	0.0285675	0.0294863	0.0279467	0.0309506	0.0227724	0.0204589	0.0459022	0.0558369	0.0476607	0.0563083	0.0198334	0.0262067	0.028633	0.0288769	0.0205641
Abhd6	0.0703645	0.230511	0.138794	0.307625	0.25756	0.17665	0.187903	0.225954	0.142376	0.186005	0.121851	0.157911	0.154991	0.150272	0.19081	0.117103	0.138401	0.110661	0.125671	0.122438	0.14601
Abhd8	1.51676	0.761461	1.37356	1.3259	1.39362	1.39451	1.46119	1.50996	1.45881	1.47275	1.27524	1.32685	1.50143	1.63576	1.51113	1.40302	1.43696	1.473	1.33058	1.41419	1.38947
Abi1	0.35847	0.0928896	0.359307	0.307625	0.485865	0.400428	0.458492	0.384553	0.433499	0.36089	0.345077	0.362831	0.347552	0.488694	0.51628	0.39787	0.382351	0.374266	0.341545	0.239579	0.31115
Abi2	0.537171	0.207804	0.710775	0.65948	0.840277	0.614747	0.814574	0.725535	0.714132	0.718523	0.76721	0.739046	0.613789	0.744836	0.849978	0.593624	0.718408	0.645716	0.645991	0.502101	0.543533
Abi3	0	0	0	0	0.0104165	0.00934566	0.00439559	0.0053619	0.00310559	0.010767	0.00207039	0.00767256	0.00765299	0	0.00627348	0.00938953	0.00826437	0.00604835	0.00343642	0.0108301	0.00514137
Abi3bp	0.734866	0	0.0126579	0.0208318	0.00520831	0.00467288	0.0285675	0.0187657	0.0186325	0.00942113	0.0144922	0.0230159	0.0433538	0.016759	0.266593	0.0937593	1.02966	1.0836	0.0343575	0.100912	0.0154236
Abl1	0	0.069711	0.0253138	0.0624594	0.0832372	0.0700362	0.0571118	0.085686	0.0744653	0.0618717	0.0662042	0.0587897	0.0637324	0.0781328	0.0651985	0.0516203	0.0792558	0.0483682	0.0641027	0.0541252	0.0513913
Abl2	0.0844068	0.0464949	0.225921	0.103979	0.140166	0.0933224	0.185743	0.128334	0.130068	0.122172	0.11774	0.112296	0.117079	0.0892669	0.14752	0.149675	0.118729	0.122676	0.119987	0.0613334	0.125633
Ablim1	0.0984325	0.512193	0.418092	0.347152	0.371597	0.383085	0.474321	0.489589	0.48676	0.401009	0.366482	0.312047	0.306407	0.291925	0.459222	0.419511	0.374645	0.400498	0.396197	0.35699	0.291485
Ablim2	0.0563083	0.364001	0.406439	0.462501	0.585722	0.506148	0.653567	0.710748	0.508815	0.479405	0.551349	0.621595	0.352357	0.433246	0.438737	0.410877	0.360721	0.355376	0.448708	0.232555	0.3307
Ablim3	0	0.18499	0.201172	0.145321	0.317553	0.148981	0.298829	0.218106	0.22178	0.208447	0.289917	0.255522	0.134796	0.139215	0.278687	0.27357	0.248669	0.174516	0.16534	0.0721396	0.191627
Abr	0.767477	0.592607	0.984811	0.821204	1.07017	0.813722	0.910595	1.09162	0.916077	0.844743	0.842793	0.820418	0.666405	0.736154	0.842704	0.943064	0.805792	0.6324	0.793721	0.577473	0.687482
Abracl	0.0281653	0.230511	0.238246	0.405465	0.237349	0.281321	0.172766	0.152226	0.287931	0.128849	0.189343	0.114837	0.217665	0.483709	0.214168	0.218905	0.216487	0.272813	0.182265	0.158184	0.216807
Abraxas1	0.0703645	0.207804	0.0126579	0.0624594	0.0780457	0.0560454	0.0746559	0.0776699	0.071368	0.0430553	0.0558715	0.0715502	0.0306075	0.0614139	0.045154	0.0375499	0.0347038	0.0302373	0.0389363	0.0252681	0.0513913
Abraxas2	0.291624	0.16208	0.3474	0.462501	0.361844	0.308183	0.34685	0.396996	0.379056	0.344428	0.343124	0.316919	0.272139	0.339792	0.320698	0.287119	0.259875	0.24551	0.293588	0.161749	0.276663
Abt1	0.250881	0.0464949	0.406439	0.206855	0.277668	0.204186	0.29462	0.293361	0.287931	0.259526	0.275986	0.183118	0.225134	0.199786	0.239852	0.287119	0.253475	0.229826	0.289194	0.175985	0.194151
Abtb1	0.384799	0.407253	0.335446	0.186418	0.312593	0.317089	0.286187	0.303624	0.34703	0.281593	0.271996	0.243122	0.247466	0.329216	0.285925	0.291624	0.269455	0.170543	0.257179	0.204351	0.234353
Abtb2	0.140384	0	0	0.0208318	0.0104165	0.0186905	0.0087911	0.0535936	0.012422	0.0134585	0.00414077	0.00767256	0.00255102	0.016759	0.0100375	0.0187782	0.0148755	0.00403225	0.0125999	0.021659	0.0102826
AC061963.1	0	0	0.0379656	0	0.0104165	0.00467288	0.0131864	0.0214461	0.00621114	0.010767	0.0144922	0.0179019	0.00765299	0.00558656	0.0138013	0.00469482	0.0198334	0.0120965	0.0114545	0	0.00514137
AC078895.1	0.014084	0.0464949	0.1763	0.124677	0.109158	0.153601	0.118404	0.13365	0.0930334	0.142185	0.109512	0.0868473	0.0688232	0.0892669	0.048914	0.0656805	0.0644182	0.080558	0.110884	0.0360932	0.0975317
AC101921.1	0.0563083	0.0232537	0.0379656	0.124677	0.0364503	0.0140182	0.0285675	0.0616232	0.083753	0.0860311	0.0393273	0.0306857	0.0255074	0.016759	0.0914659	0.023472	0.0181808	0.0362824	0.0217623	0	0.0102826
AC110166.2	0	0.0232537	0.0253138	0	0.0104165	0.0140182	0.00439559	0.0160851	0.012422	0.00807528	0.012422	0.00511507	0	0.0223445	0.00878282	0.023472	0.01157	0.0120965	0.00572735	0.0108301	0.00257069
AC114585.1	0	0	0.0126579	0	0.0104165	0.0327045	0.0614997	0.0241263	0.00621114	0.0134585	0.0351894	0.0383538	0.0102039	0.016759	0.0376323	0.0469311	0.0132228	0.0302373	0.0194719	0.0180496	0.0128531
AC118542.1	0.0844068	0	0.225921	0	0.495143	0.0607104	0.488081	0.480013	0.34703	0.306099	0.36842	0.267884	0.0255074	0.0837011	0.176003	0.107772	0.164546	0.100636	0.143833	0.0541252	0.0872927
AC122413.1	0.014084	0.069711	0.0506113	0.0208318	0.0312449	0.0373745	0.0395501	0.0509163	0.046567	0.0470889	0.0703354	0.0562363	0.0433538	0.066989	0.0501672	0.060995	0.039659	0.0282221	0.0538114	0.0108301	0.0513913
AC123724.1	0	0.0232537	0.0126579	0	0.0260387	0	0.0087911	0.0214461	0.00621114	0.00538355	0.0144922	0.0153447	0.00765299	0.0335133	0.00752816	0.00938953	0.01157	0.00806443	0.0068728	0.0036101	0.0128531
AC124532.2	0	0	0	0	0.0104165	0	0.0131864	0.00804281	0.00621114	0.00269179	0.00621114	0.00255754	0.00255102	0.011173	0.00878282	0	0.00330578	0.00201613	0.00572735	0.0036101	0.00771201
AC124561.1	0	0.0232537	0	0	0.00520831	0.00934566	0.0285675	0.0268064	0.00621114	0.0255692	0.0165624	0.035798	0.0204067	0.016759	0.0188195	0.0187782	0.00661152	0.0100805	0.00572735	0.0180496	0.0102826
AC124739.2	0	0	0.0379656	0	0.0156244	0.00467288	0.015384	0.0187657	0.0186325	0.010767	0.0207025	0.01023	0.00255102	0.0390962	0.00878282	0.00938953	0.0148755	0.00806443	0.0103091	0.0144399	0.0102826
AC127341.3	0	0.069711	0.0126579	0	0.0260387	0.0140182	0.0263706	0.0187657	0.049669	0.0269147	0.0248422	0.0179019	0.0153055	0.00558656	0.017565	0.0375499	0.0198334	0.0362824	0.0229075	0.0036101	0.0102826
AC127341.5	0	0	0	0.0208318	0.0104165	0	0.0021978	0.0053619	0.00310559	0.00538355	0.00621114	0.00511507	0.00255102	0.00558656	0.00752816	0.00469482	0.00991719	0.00403225	0.00458189	0	0.00257069
AC129328.1	0	0	0.0253138	0.0832372	0.0260387	0	0.0219763	0.0053619	0.00931664	0.00807528	0.0227724	0.00767256	0.0102039	0.00558656	0.0213284	0.00938953	0.0132228	0.0120965	0.00572735	0.0108301	0.0205641
AC140186.1	0	0.0232537	0	0.0208318	0.00520831	0.0140182	0.0021978	0.00268096	0	0.00403767	0	0.01023	0	0	0.0050188	0.00469482	0.00495866	0	0.00229095	0.0036101	0.00514137
AC140300.1	0.0281653	0	0	0	0.00520831	0	0.0131864	0.00268096	0.00931664	0	0.00414077	0	0.0153055	0.011173	0.00376411	0	0.01157	0.00604835	0.00343642	0.0036101	0
AC146911.1	0.0563083	0.16208	0.0506113	0.0208318	0.0572604	0.0186905	0.0571118	0.066974	0.049669	0.0524658	0.049669	0.0485742	0.038256	0.0335133	0.058937	0.0469311	0.039659	0.0443403	0.0469472	0.0901306	0.0411195
AC149090.1	0.851178	1.65154	1.41497	1.13556	1.18897	1.21787	1.18313	1.173	1.16864	1.01804	1.1521	1.21795	1.02021	1.42601	1.49034	1.43097	1.44511	1.18127	1.18999	1.08919	0.981287
AC152827.1	0	0.0464949	0.0253138	0.0208318	0.0208318	0.0280337	0.0197789	0.0107237	0.0217374	0.00672942	0.041396	0.0255727	0.0229572	0.0223445	0.0288542	0.0375499	0.0181808	0.0181442	0.0251978	0.0108301	0.0205641
AC154760.1	0	0.0464949	0.0379656	0.0416546	0.0364503	0.0420437	0.0505279	0.0428823	0.0403617	0.0309506	0.0248422	0.0230159	0.0331572	0.0279293	0.0263458	0.0375499	0.0231384	0.0161283	0.0194719	0.021659	0.0128531
AC156026.1	0	0	0.0379656	0	0.0208318	0	0.0329611	0.0107237	0.012422	0.0121128	0.012422	0.00511507	0.00255102	0	0.0050188	0.00938953	0.00330578	0	0.00572735	0.0036101	0
AC160336.1	0.16822	1.31138	0.607506	0.307625	0.650959	0.39177	0.503703	0.443739	0.508815	0.407225	0.506071	0.4033	0.508423	0.318605	0.58575	0.541258	0.660098	0.492005	0.435162	0.246591	0.402893
AC161165.3	0.014084	0	0.0379656	0	0.0260387	0.00467288	0.0131864	0.0187657	0.0186325	0.0174957	0.0144922	0.0127874	0.0102039	0.00558656	0.00752816	0.00938953	0.01157	0.00806443	0.0137453	0.00722015	0.00771201
AC161165.6	0.0281653	0.0464949	0.0126579	0.0208318	0.0312449	0.0280337	0.0329611	0.0562706	0.0155273	0.0322959	0.0393273	0.0383538	0.0204067	0.016759	0.0413934	0.023472	0.0330518	0.0241912	0.028633	0.0324853	0.0436879
AC162302.1	0	0	0	0	0.0104165	0.00934566	0.0021978	0.0053619	0	0.00672942	0.00621114	0.00511507	0.00255102	0	0	0.00469482	0	0.00201613	0.00458189	0.0108301	0
AC163032.1	0.0281653	0	0.0506113	0	0.0364503	0.0513793	0.0636932	0.0535936	0.0403617	0.0685869	0.0703354	0.0664473	0.0433538	0.0446779	0.0664505	0.0844068	0.0743118	0.0282221	0.0572425	0.0469142	0.0642232
AC163040.1	0	0.0464949	0.0126579	0.0624594	0.0208318	0.00467288	0.0021978	0.0053619	0.00621114	0.00403767	0.00621114	0.00767256	0.00255102	0.00558656	0.00752816	0.00938953	0.00991719	0.0100805	0.00458189	0	0.0102826
AC163633.1	0	0.116019	0.163823	0.103979	0.0572604	0.0607104	0.0877992	0.0562706	0.114655	0.0188414	0.0186325	0.00767256	0.0255074	0.066989	0.0727088	0.0844068	0.0512173	0.0282221	0.045803	0.0108301	0.0590916
AC164424.1	0	0	0.0253138	0.0416546	0.0208318	0.0560454	0.0241735	0.0268064	0.0155273	0.0201871	0.0144922	0.0306857	0.00765299	0.011173	0.0213284	0.0281653	0.0181808	0.0141124	0.0206171	0.0036101	0.0308434
AC165953.2	0.0281653	0.116019	0.225921	0.145321	0.211951	0.195023	0.23091	0.20762	0.200517	0.199218	0.158753	0.188146	0.149948	0.17233	0.156202	0.209727	0.154753	0.132675	0.167599	0.0829374	0.117978
AC168977.1	0.014084	0.116019	0.0126579	0.0208318	0.0208318	0.0140182	0.0131864	0.0134044	0.0155273	0.010767	0.0165624	0.00255754	0.00765299	0.00558656	0.0150559	0.014084	0.021486	0.0100805	0.0125999	0.0108301	0.0128531
AC174678.1	0	0	0	0	0.0156244	0.0140182	0.0109888	0.00268096	0.00621114	0.00538355	0.00414077	0.01023	0.00765299	0	0.00752816	0.00469482	0.00991719	0.00604835	0.00458189	0.0036101	0.00257069
Acaa1a	0.524863	0.814044	0.323445	0.267627	0.400653	0.339249	0.375713	0.372054	0.329414	0.343158	0.370357	0.39857	0.472066	0.493669	0.408841	0.415198	0.406863	0.389286	0.3813	0.390706	0.395758
Acaa1b	0.014084	0	0.0379656	0.0208318	0.0156244	0.0186905	0.0175815	0.0107237	0.00931664	0.00672942	0.00414077	0.00767256	0.00765299	0.016759	0.00752816	0.042241	0.00495866	0.0161283	0.0114545	0	0.0102826
Acaa2	0.042241	0.069711	0.0253138	0.0416546	0.0468579	0.0280337	0.0505279	0.0535936	0.0434646	0.0349861	0.0351894	0.0230159	0.0586399	0.0446779	0.0626942	0.0469311	0.057819	0.0342675	0.0423699	0.0397008	0.0513913
Acaca	0.26451	0.18499	0.299308	0.227207	0.443637	0.312639	0.398185	0.396996	0.34703	0.330428	0.337256	0.260472	0.383395	0.265042	0.40421	0.376051	0.393103	0.321068	0.360954	0.175985	0.306245
Acacb	0	0.069711	0.0506113	0.0208318	0.103979	0.0373745	0.0834197	0.0776699	0.0434646	0.0591848	0.0331202	0.0485742	0.0331572	0.016759	0.0263458	0.089084	0.0528679	0.00604835	0.0549552	0.0036101	0.0411195
Acad10	0	0.0464949	0	0.0208318	0.0104165	0	0.0109888	0.0160851	0.00931664	0.01615	0.0144922	0.00767256	0.00510202	0.0279293	0.0138013	0.00469482	0.01157	0.0100805	0.0114545	0.00722015	0.00514137
Acad11	0.042241	0	0.0884921	0.0416546	0.0572604	0.0607104	0.0417461	0.0803425	0.049669	0.0564975	0.0620719	0.0587897	0.0484504	0.0279293	0.0413934	0.0375499	0.0297477	0.0403117	0.036647	0.0397008	0.0282739
Acad12	0.042241	0.069711	0.0126579	0	0.0104165	0	0.0395501	0.0160851	0.00621114	0.0134585	0.0289815	0.0255727	0.0102039	0.016759	0.0213284	0	0.0181808	0.00403225	0.0148906	0.0036101	0.0179939
Acad8	0.126424	0.139086	0.0758765	0.103979	0.0624594	0.121198	0.107485	0.0803425	0.114655	0.107465	0.152616	0.109754	0.114545	0.0837011	0.130122	0.135733	0.110519	0.124677	0.0937914	0.111681	0.0796074
Acad9	0.154316	0.069711	0.113679	0.165905	0.135006	0.158218	0.0987406	0.123014	0.163862	0.110141	0.0930334	0.104668	0.109475	0.128141	0.123899	0.135733	0.128571	0.0845766	0.10519	0.0613334	0.130733
Acadl	0	0.18499	0.0126579	0.0416546	0.0104165	0.0700362	0.0241735	0.032166	0.0310509	0.0188414	0.0207025	0.0204589	0.0204067	0.0223445	0.017565	0.0563083	0.061119	0.0181442	0.0125999	0.0793391	0.046256
Acadm	0.250881	0.18499	0.151321	0.206855	0.186418	0.130471	0.209454	0.249417	0.169988	0.222914	0.128014	0.114837	0.149948	0.139215	0.356279	0.241769	0.354511	0.22393	0.160818	0.257086	0.128183
Acads	0.0281653	0.491588	0.0253138	0.0208318	0.0468579	0.046712	0.0307644	0.0428823	0.0279467	0.0242237	0.0372585	0.0204589	0.0840846	0.066989	0.055179	0.0703645	0.0858449	0.0423261	0.0515236	0.0360932	0.0231342
Acadsb	0.112439	0.0928896	0.323445	0.347152	0.438898	0.294778	0.444553	0.43886	0.352879	0.362153	0.427823	0.443153	0.38102	0.291925	0.40421	0.31406	0.313831	0.311472	0.314383	0.197274	0.269229
Acadvl	0.278092	0.83117	0.188751	0.186418	0.186418	0.195023	0.161929	0.210244	0.166926	0.164798	0.148522	0.152857	0.180146	0.210727	0.192042	0.121765	0.19058	0.154625	0.1427	0.158184	0.140921
Acap2	0.042241	0.116019	0.113679	0.145321	0.0728522	0.102624	0.120587	0.104368	0.126988	0.106126	0.0930334	0.112296	0.101865	0.0837011	0.122653	0.149675	0.0973667	0.110661	0.0880876	0.129601	0.0949728
Acap3	0.0984325	0.0464949	0.113679	0.145321	0.140166	0.130471	0.12931	0.168108	0.136224	0.112816	0.134173	0.0995796	0.112011	0.066989	0.162397	0.16822	0.133488	0.160599	0.125671	0.0973192	0.0821697
Acat1	0.597594	0.385713	0.441239	0.607727	0.490509	0.460217	0.583843	0.539177	0.525208	0.470956	0.459815	0.415087	0.581471	0.66043	0.572909	0.561565	0.59277	0.548667	0.515268	0.383995	0.534583
Acat2	0.112439	0.0928896	0.335446	0.386164	0.448367	0.497867	0.438554	0.31641	0.522485	0.409706	0.374227	0.445477	0.57712	0.448499	0.392597	0.432408	0.470096	0.378028	0.408899	0.229039	0.383822
Acat3	0	0	0	0	0.00520831	0.00467288	0	0	0.012422	0.00403767	0.00828148	0.00255754	0.00510202	0.011173	0.0050188	0.00938953	0.00165289	0	0.00458189	0	0.00257069
Acbd3	0.436692	0.0464949	0.299308	0.518166	0.381317	0.352469	0.373661	0.40938	0.358717	0.329152	0.356772	0.331491	0.418774	0.392109	0.35392	0.331901	0.390035	0.294128	0.281491	0.305686	0.32094
Acbd4	0.345215	0.116019	0.262788	0.347152	0.332387	0.23157	0.23305	0.262394	0.18222	0.243874	0.285943	0.270352	0.127208	0.161311	0.32189	0.27357	0.19869	0.204223	0.191271	0.172429	0.20675
Acbd5	0.223487	0.207804	0.418092	0.462501	0.467193	0.481212	0.515346	0.48241	0.461684	0.457615	0.444813	0.431497	0.478929	0.371298	0.517384	0.428116	0.478993	0.387413	0.362028	0.253591	0.364618
Acbd6	0.632941	0.364001	0.649553	0.693147	0.672184	0.634194	0.685658	0.779285	0.674409	0.618039	0.637163	0.540996	0.596622	0.642108	0.6803	0.541258	0.594169	0.605468	0.560162	0.536994	0.58769
Acbd7	0.126424	0	0.063249	0	0.0156244	0.0373745	0.0109888	0.0294863	0.0155273	0.0174957	0.109512	0.107211	0.0357067	0.0223445	0.0476607	0.0328579	0.0347038	0.0100805	0.0789557	0.0252681	0.0282739
Accs	0.014084	0.0928896	0.0506113	0.103979	0.0416546	0.0373745	0.0483328	0.0509163	0.0403617	0.033641	0.0310509	0.0255727	0.0280575	0.0390962	0.0539262	0.0516203	0.0148755	0.0181442	0.0194719	0.0360932	0.0231342
Acd	0.154316	0.16208	0.299308	0.481212	0.424624	0.378731	0.392075	0.377061	0.367451	0.330428	0.301815	0.367622	0.330675	0.360834	0.392597	0.31853	0.379271	0.362947	0.299073	0.214947	0.28161
Ace	0.0281653	0.0232537	0.138794	0.0416546	0.109158	0.0793559	0.124949	0.0749967	0.11157	0.0820076	0.0806579	0.0511286	0.0891675	0.0837011	0.0514202	0.0656805	0.0660676	0.0705061	0.101772	0.0433078	0.0872927
Acer2	0.126424	0	0.0758765	0.145321	0.114334	0.065374	0.103114	0.107034	0.0868473	0.0820076	0.0248422	0.0485742	0.0967876	0.105947	0.105201	0.0703645	0.0891381	0.0644715	0.0549552	0.0252681	0.0539584
Acer3	0.042241	0.069711	0.126247	0.103979	0.140166	0.148981	0.144551	0.136307	0.133147	0.114153	0.109512	0.117377	0.124677	0.122598	0.108944	0.158954	0.136763	0.112665	0.0880876	0.0757398	0.102647
Ache	0.537171	0.725388	0.607506	1.07336	0.866565	0.974027	0.830759	0.672104	0.816235	0.764506	0.878443	0.770555	0.733465	0.779092	0.670155	0.690328	0.715801	0.590144	0.824367	0.536994	0.783625
Acin1	0.690328	0.612199	0.863358	0.980829	0.896029	0.799809	0.928739	0.953409	0.896662	0.842789	0.827676	0.835432	0.772792	0.885318	0.843616	0.910938	0.810709	0.809766	0.788552	0.881374	0.827664
Ackr1	0.250881	0.0928896	0.275002	0.499768	0.227207	0.276825	0.256518	0.254613	0.404987	0.249098	0.317614	0.314484	0.311275	0.493669	0.324274	0.436692	0.374645	0.420927	0.344789	0.161749	0.254319
Ackr3	0	0.0232537	0	0	0.0416546	0.00467288	0.00659336	0.00804281	0.00621114	0.00403767	0.012422	0.00511507	0.00255102	0.011173	0.0012547	0.00938953	0.00661152	0.00403225	0.00458189	0	0.0179939
Acly	0.701576	0.16208	0.564478	0.642396	0.549977	1.45196	0.544171	0.656835	0.656733	0.599962	0.583328	0.4033	0.729478	0.571697	0.46375	0.516617	0.452199	0.404224	0.42259	0.530693	0.556885
Aco1	0	0	0.0506113	0.0208318	0.0312449	0.046712	0.0571118	0.0509163	0.0403617	0.0376761	0.0393273	0.0383538	0.0535458	0.0390962	0.045154	0.042241	0.0231384	0.0322525	0.0263429	0.0324853	0.0205641
Aco2	0.958847	0.65076	0.740556	1.22894	0.746436	0.961616	0.907548	1.0115	0.740892	0.895577	0.728783	0.632225	0.992242	0.849415	0.676249	0.830691	0.80086	0.608856	0.74301	0.958337	0.844547
Acot1	0.014084	0	0.0253138	0	0.0572604	0.0140182	0.0241735	0.0509163	0.0279467	0.0417107	0.0600054	0.01023	0.0255074	0.0279293	0.0150559	0.014084	0.0148755	0.0282221	0.0229075	0.0252681	0.0488238
Acot11	0	0	0.0758765	0.0416546	0.0312449	0.0420437	0.0702718	0.0642988	0.0341548	0.0376761	0.0248422	0.01023	0.0433538	0.0948299	0.0363784	0.0328579	0.0347038	0.0322525	0.0206171	0.0288769	0.0154236
Acot13	1.25939	0.65076	0.96811	1.07336	1.04107	1.01956	1.03552	1.01837	1.06206	0.965382	1.05822	1.02706	1.11433	1.03444	0.889336	0.864677	0.849462	0.840888	0.997808	1.08701	0.993063
Acot2	0.0281653	0	0.0379656	0.0624594	0.145321	0.0280337	0.100927	0.0696488	0.058972	0.0739568	0.101276	0.0766513	0.0280575	0.011173	0.0514202	0.00469482	0.0280955	0.0443403	0.0400809	0.104503	0.046256
Acot3	0.0281653	0	0	0.0208318	0.0260387	0.0186905	0.0175815	0.0187657	0.012422	0.010767	0.0103518	0	0.0102039	0.011173	0.00627348	0	0.00330578	0.00806443	0.0137453	0	0.0205641
Acot4	0	0	0.0253138	0	0.00520831	0.0140182	0.0175815	0.0107237	0.00621114	0.010767	0.012422	0.01023	0.0102039	0.00558656	0.00627348	0.00938953	0.00826437	0.00604835	0.0068728	0	0.00514137
Acot6	0.014084	0	0	0.0624594	0.0416546	0.0233624	0.0307644	0.0294863	0.0155273	0.0188414	0.0269119	0.0255727	0.0178562	0.011173	0.0188195	0.00938953	0.0181808	0.00806443	0.0206171	0.0252681	0.0179939
Acot7	1.73507	1.13528	1.21909	1.48927	1.25669	1.55489	1.32672	1.36029	1.31117	1.31769	1.29651	1.19547	1.61453	1.50913	1.29578	1.2982	1.32035	1.27058	1.32148	1.46917	1.34644
Acot8	0.209727	0.16208	0.163823	0.186418	0.201753	0.158218	0.196535	0.204996	0.173048	0.155496	0.193409	0.218213	0.16003	0.17233	0.248379	0.172847	0.184083	0.166567	0.155161	0.100912	0.140921
Acot9	0.0703645	0.0232537	0.063249	0.227207	0.0987975	0.107271	0.120587	0.0883568	0.077562	0.0846901	0.0950947	0.0511286	0.0739123	0.111501	0.0977114	0.0984325	0.0973667	0.104648	0.0652458	0.0469142	0.0821697
Acox1	0.410877	0.139086	0.359307	0.347152	0.558975	0.514396	0.576349	0.667755	0.584209	0.524714	0.590363	0.676182	0.462884	0.483709	0.542614	0.445237	0.511312	0.441192	0.427836	0.250092	0.376636
Acox3	0.042241	0.116019	0.1763	0.103979	0.176171	0.148981	0.224483	0.334225	0.148522	0.167453	0.0889097	0.109754	0.0917081	0.066989	0.0927153	0.0844068	0.0809034	0.112665	0.0835226	0.0685384	0.0847315
Acp1	1.44992	1.71013	1.53593	1.36652	1.69268	1.50858	1.56633	1.60717	1.53171	1.45322	1.65832	1.52201	1.47624	1.62098	1.67733	1.63936	1.56201	1.61686	1.47943	1.56436	1.48205
Acp2	0.0844068	0.139086	0.225921	0.267627	0.30265	0.33483	0.454518	0.404434	0.332357	0.384782	0.27798	0.316919	0.286866	0.2434	0.403051	0.35847	0.285367	0.274756	0.25607	0.172429	0.271709
Acp6	0.042241	0.230511	0.0758765	0.103979	0.0832372	0.0327045	0.0527228	0.085686	0.0558715	0.0820076	0.0393273	0.0485742	0.0509983	0.0390962	0.0839665	0.0375499	0.172694	0.0926095	0.0446587	0.0793391	0.0385509
Acr	0	0	0	0	0.0104165	0	0.00439559	0.00804281	0	0.00672942	0.0144922	0.0153447	0.00510202	0.011173	0.00752816	0.00938953	0.00165289	0.0100805	0.00458189	0	0.00514137
Acrbp	0.182091	0.116019	0.0379656	0.0832372	0.0987975	0.135103	0.118404	0.170751	0.105395	0.132852	0.0744653	0.0944885	0.144901	0.117051	0.146278	0.126424	0.154753	0.142661	0.0709599	0.0469142	0.10009
Acsbg1	0.112439	0.139086	0.063249	0.0208318	0.0676567	0.046712	0.0614997	0.0616232	0.0651712	0.063215	0.0517368	0.0536827	0.056093	0.0614139	0.0626942	0.0656805	0.077608	0.0483682	0.0480914	0.122438	0.046256
Acsf2	0.0281653	0	0.0126579	0	0.0208318	0.0140182	0.0021978	0.0107237	0.00931664	0.00403767	0.00828148	0.00511507	0	0.00558656	0.00878282	0.00938953	0.00661152	0.00201613	0.00458189	0.00722015	0.00514137
Acsf3	0.042241	0.0464949	0.0253138	0.0208318	0.0520598	0.0420437	0.0505279	0.0910271	0.046567	0.0739568	0.0476011	0.0638951	0.056093	0.0837011	0.0714574	0.0656805	0.0479155	0.0403117	0.0549552	0.0144399	0.0719174
Acsl1	0.384799	0.5326	0.359307	0.103979	0.352057	0.23157	0.332311	0.318961	0.284948	0.255619	0.281963	0.2257	0.170097	0.286565	0.267804	0.246328	0.224554	0.237675	0.25607	0.200814	0.204233
Acsl3	0.345215	0.364001	0.564478	0.836482	0.642396	0.72462	0.789962	0.795456	0.723914	0.67011	0.565627	0.602304	0.649738	0.585994	0.469397	0.561565	0.48638	0.439357	0.580771	0.417379	0.563527
Acsl4	0.0984325	0.16208	0.323445	0.347152	0.429391	0.374371	0.648159	0.401957	0.44199	0.413425	0.307749	0.292487	0.541955	0.339792	0.486256	0.428116	0.431146	0.404224	0.344789	0.15105	0.31115
Acsl5	0.014084	0	0.163823	0.0832372	0.191535	0.135103	0.211604	0.165464	0.163862	0.17276	0.105395	0.0536827	0.132267	0.150272	0.112685	0.145031	0.133488	0.160599	0.131352	0.0613334	0.148553
Acsl6	0.182091	0.385713	0.188751	0.499768	0.191535	0.352469	0.235188	0.27016	0.236908	0.234716	0.237915	0.22071	0.277054	0.371298	0.226417	0.237206	0.250272	0.1884	0.234946	0.404076	0.284081
Acss1	0.014084	0	0.0253138	0.0208318	0.0156244	0.0140182	0.0263706	0.0241263	0.00931664	0.00942113	0.00414077	0.01023	0.00255102	0.016759	0.00752816	0.023472	0.00826437	0.00604835	0.0103091	0.00722015	0.0154236
Acss2	0.182091	0.275569	0.0379656	0.145321	0.145321	0.107271	0.0965532	0.101701	0.0806579	0.112816	0.0930334	0.112296	0.182656	0.0781328	0.0852168	0.195927	0.0907843	0.0865853	0.118849	0.118854	0.0872927
Acta1	0.112439	0.116019	0.126247	0.186418	0.145321	0.0560454	0.250131	0.301061	0.154662	0.233407	0.109512	0.114837	0.0789994	0.072562	0.145037	0.177471	0.143311	0.136671	0.121124	0.0577297	0.168862
Acta2	0	0	0.0126579	0.0208318	0.0260387	0.0186905	0.0263706	0.0348455	0.0310509	0.0242237	0.0269119	0.0255727	0.0357067	0.0335133	0.0351245	0.0187782	0.0264432	0.0342675	0.0343575	0.0973192	0.0205641
Actb	3.38625	2.70475	3.32805	3.60601	3.27935	3.23747	3.58988	3.60853	3.6165	3.44404	3.44412	3.46175	3.21844	3.52624	3.67955	3.26853	3.69165	3.63605	3.58854	3.85405	3.31983
Actg1	2.32343	2.11703	1.92132	2.10976	2.18765	2.28363	2.24611	2.17415	2.1744	2.27507	2.06672	1.95973	2.33127	2.21237	2.28146	2.18304	2.25029	2.19215	2.02845	2.33899	2.10649
Actl6a	0.140384	0.253103	0.213563	0.247466	0.181297	0.139732	0.220194	0.199742	0.18222	0.16878	0.175087	0.19568	0.129738	0.221644	0.180943	0.117103	0.156387	0.166567	0.1495	0.0829374	0.120531
Actl6b	0.597594	0.385713	0.564478	0.805767	0.590144	0.579215	0.578225	0.527476	0.620833	0.496209	0.588607	0.587159	0.630796	0.646707	0.581479	0.491685	0.509853	0.5539	0.538338	0.527536	0.518825
Actn1	0.154316	0.320088	0.262788	0.165905	0.272651	0.272323	0.273501	0.239005	0.264003	0.191294	0.262003	0.178085	0.165066	0.227093	0.308748	0.31853	0.245462	0.247466	0.220433	0.214947	0.133281
Actn2	0	0.116019	0	0	0.0156244	0.0140182	0.0087911	0.0294863	0.00931664	0.00807528	0.00414077	0.00255754	0.0204067	0.016759	0.0125467	0.00469482	0.00826437	0.00806443	0.0125999	0.00722015	0.00771201
Actn4	0.500028	0.230511	0.138794	0.247466	0.201753	0.208761	0.213753	0.218106	0.179164	0.205812	0.193409	0.180602	0.192683	0.194306	0.247162	0.259972	0.20355	0.182454	0.160818	0.175985	0.204233
Actr10	0.384799	0.385713	0.670206	0.518166	0.527305	0.653432	0.581972	0.619187	0.578918	0.521172	0.549557	0.491482	0.539737	0.600184	0.601679	0.561565	0.561725	0.524067	0.576863	0.450328	0.49839
Actr1a	0.26451	0.320088	0.531572	0.607727	0.545463	0.502011	0.561272	0.603453	0.506071	0.464902	0.504239	0.466294	0.460583	0.42814	0.529489	0.487502	0.481951	0.426471	0.403614	0.380634	0.381429
Actr1b	0.537171	0.8481	0.854265	0.836482	0.813505	0.884674	0.806415	0.813443	0.820822	0.733299	0.781379	0.820418	0.668477	0.829076	0.820664	0.930304	0.866098	0.689918	0.737669	0.747819	0.728246
Actr2	0.851178	1.16207	1.03368	1.3259	1.14161	1.06643	1.22664	1.30068	1.24039	1.16414	1.19074	1.02218	1.20041	1.19321	1.33226	1.10983	1.18047	1.13046	1.09241	1.12151	1.0359
Actr3	0.690328	0.364001	0.916727	0.866565	0.92845	0.82063	0.893752	0.907666	0.962409	0.781917	0.798521	0.735063	0.960263	0.804292	0.839967	0.813397	0.741678	0.728254	0.695208	0.799986	0.783625
Actr3b	0.140384	0.230511	0.250535	0.366725	0.277668	0.285812	0.281963	0.311302	0.305772	0.383529	0.24596	0.228193	0.252413	0.493669	0.606959	0.371666	0.417516	0.343983	0.233831	0.246591	0.239353
Actr5	0.0703645	0.0928896	0.0506113	0.0624594	0.0936132	0.0607104	0.0702718	0.0883568	0.0682699	0.0846901	0.0620719	0.0562363	0.0739123	0.0502582	0.0689541	0.0469311	0.0627687	0.0725171	0.0675317	0.0613334	0.0744812
Actr6	0.237206	0.0928896	0.201172	0.0832372	0.181297	0.181249	0.245867	0.254613	0.22178	0.203175	0.2238	0.230685	0.220156	0.216189	0.252029	0.223487	0.218101	0.200271	0.182265	0.161749	0.178991
Actr8	0.16822	0.139086	0.275002	0.186418	0.30265	0.339249	0.348921	0.362014	0.37326	0.304814	0.319584	0.292487	0.311275	0.329216	0.331415	0.27357	0.342051	0.272813	0.294685	0.343392	0.234353
Actrt3	0.195927	0	0.0379656	0.0208318	0.0208318	0.0513793	0.0219763	0.0294863	0.0403617	0.0255692	0.0165624	0.0204589	0.0255074	0.0502582	0.0200739	0.014084	0.00661152	0.0221756	0.0251978	0.0144399	0.0308434
Acvr1	0.0563083	0.069711	0.063249	0.165905	0.0780457	0.0793559	0.0943654	0.0589471	0.0682699	0.0685869	0.0744653	0.074101	0.0688232	0.105947	0.101457	0.0750469	0.0891381	0.0564217	0.0686745	0.0721396	0.0436879
Acvr1b	0.0563083	0.0928896	0.238246	0.267627	0.217042	0.236118	0.298829	0.272745	0.272994	0.234716	0.199502	0.127531	0.230107	0.177832	0.208032	0.163589	0.216487	0.176502	0.168729	0.143907	0.171396
Acvr1c	0.014084	0	0	0.0624594	0.0104165	0.0140182	0.0395501	0.0134044	0.0279467	0.02826	0.164883	0.0715502	0.00255102	0.00558656	0.00627348	0.00938953	0.00826437	0.0946168	0.00916367	0.100912	0.0179939
Acvr2a	0	0	0.0253138	0.103979	0.17104	0.0840133	0.19869	0.120353	0.139301	0.100771	0.150569	0.112296	0.071368	0.072562	0.142553	0.117103	0.117088	0.0906018	0.0869465	0.0649363	0.0847315
Acvr2b	0.0984325	0	0.311399	0.536404	0.499768	0.356863	0.383907	0.367038	0.287931	0.364676	0.333337	0.326641	0.38814	0.297278	0.356279	0.39787	0.298047	0.282517	0.272668	0.0937255	0.279137
Acy1	0.0703645	0.069711	0.0253138	0.0624594	0.0156244	0.0420437	0.0263706	0.0214461	0.00621114	0.0215327	0.0248422	0.0306857	0.056093	0.0390962	0.0338706	0.0281653	0.0165282	0.0241912	0.0240527	0.021659	0.0282739
Acyp1	0.537171	0.428616	0.564478	0.443637	0.337317	0.530796	0.350991	0.472803	0.453264	0.357099	0.333337	0.280206	0.49032	0.66043	0.433016	0.491685	0.337366	0.364836	0.358804	0.48605	0.428889
Acyp2	0.788843	0.342124	0.680441	0.836482	0.629474	0.824072	0.662541	0.72343	0.721474	0.730144	0.654192	0.489204	1.12036	0.833167	0.712358	0.663785	0.627436	0.637405	0.622284	0.536994	0.808676
Adal	0.140384	0	0.063249	0.165905	0.103979	0.111916	0.1053	0.101701	0.120824	0.0860311	0.107454	0.102124	0.0764561	0.105947	0.0989601	0.0984325	0.0957215	0.0765382	0.084664	0.0469142	0.0796074
Adam10	0.384799	0.139086	0.188751	0.287682	0.400653	0.227017	0.353059	0.329145	0.311698	0.269927	0.275986	0.200696	0.180146	0.286565	0.337354	0.300616	0.232607	0.383663	0.222669	0.232555	0.229347
Adam11	0.410877	1.23908	0.394732	0.347152	0.400653	0.321534	0.323973	0.288218	0.293888	0.251708	0.301815	0.185633	0.33792	0.318605	0.22764	0.246328	0.192203	0.186418	0.250521	0.363765	0.251829
Adam12	0	0	0	0	0.0364503	0	0.0351576	0.00268096	0.00310559	0.0242237	0.00414077	0	0.00255102	0	0	0	0.00661152	0.00201613	0.00229095	0	0.00514137
Adam15	0.0563083	0.5326	0.238246	0.347152	0.386164	0.317089	0.260771	0.264985	0.275986	0.232096	0.266003	0.362831	0.197689	0.291925	0.311141	0.389163	0.28219	0.290262	0.283694	0.179539	0.313601
Adam17	0.014084	0.0464949	0.0506113	0.0208318	0.0364503	0.0373745	0.0197789	0.032166	0.0186325	0.0349861	0.0289815	0.0409093	0.0178562	0.0223445	0.0288542	0.0375499	0.0198334	0.0241912	0.0183266	0.0108301	0.0257041
Adam19	0	0	0.0126579	0	0.0572604	0.0280337	0.0483328	0.0776699	0.046567	0.0417107	0.0620719	0.0383538	0.0611863	0.0781328	0.0651985	0.089084	0.0792558	0.0403117	0.0377917	0.0469142	0.0513913
Adam22	0.195927	0.139086	0.798481	0.693147	0.672184	0.468638	0.687423	0.717101	0.70182	0.577117	0.681096	0.686484	0.421116	0.66043	0.716321	0.621235	0.660098	0.527599	0.546301	0.319449	0.452288
Adam23	0.0281653	0.814044	0.55357	0.32745	0.376461	0.464431	0.410363	0.472803	0.376159	0.39478	0.34703	0.419787	0.311275	0.478712	0.384438	0.432408	0.327973	0.282517	0.378097	0.143907	0.318495
Adam33	0	0	0.163823	0	0.0416546	0.00467288	0.0351576	0.0268064	0.0248422	0.00942113	0.00414077	0.0255727	0.157511	0.0223445	0.0100375	0.0984325	0.0413106	0.0221756	0.0549552	0.0036101	0.0179939
Adam4	0	0	0.0126579	0	0	0.00934566	0.0021978	0.0107237	0	0.00672942	0.00207039	0.00255754	0	0	0.00250941	0.00469482	0.00661152	0.00806443	0.00343642	0	0
Adam8	0	0.069711	0.0253138	0.0208318	0.0260387	0.0233624	0.0263706	0.0241263	0.0279467	0.0215327	0.0144922	0.0255727	0.0357067	0.00558656	0.0301084	0.0281653	0.0297477	0.0262067	0.0251978	0.021659	0.00257069
Adam9	0.0984325	0.116019	0.0506113	0.103979	0.0728522	0.116558	0.0834197	0.0803425	0.099216	0.0672441	0.0724005	0.0664473	0.0840846	0.0837011	0.103953	0.13108	0.084198	0.0725171	0.0755295	0.0757398	0.0693531
Adamts1	0	0.0232537	0.0758765	0	0.0260387	0.0140182	0.015384	0.0134044	0.0155273	0.0188414	0.00621114	0.00767256	0.00255102	0.0335133	0.0263458	0.023472	0.0181808	0.00604835	0.0377917	0.0649363	0.0154236
Adamts10	0	0.0928896	0.0506113	0.0416546	0.109158	0.102624	0.0790386	0.107034	0.105395	0.0860311	0.0847845	0.0511286	0.0815423	0.111501	0.106449	0.13108	0.061119	0.0523954	0.0709599	0.021659	0.0949728
Adamts12	0	0	0	0.0208318	0	0.0186905	0.0263706	0.0187657	0	0.00942113	0.0144922	0.00255754	0	0.00558656	0	0	0	0	0.00114548	0	0.0102826
Adamts15	0	0	0.0506113	0.0416546	0.0936132	0.0280337	0.0329611	0.0187657	0.0341548	0.0403659	0.0248422	0.0511286	0.0102039	0.016759	0.0351245	0.0563083	0.00826437	0.0181442	0.0240527	0.0360932	0.0334128
Adamts16	0	0	0.0379656	0.0208318	0.0260387	0.0327045	0.0197789	0.00804281	0.0186325	0.0134585	0.012422	0.00255754	0.00765299	0.016759	0.00878282	0	0.00495866	0.00806443	0.0148906	0.0108301	0.0385509
Adamts17	0	0	0.0126579	0	0.0312449	0.00934566	0.0197789	0.0160851	0.00931664	0.0188414	0.0144922	0.00255754	0.0127548	0.0223445	0.0125467	0.00469482	0.0198334	0.0241912	0.00916367	0.00722015	0.00771201
Adamts18	0	0	0.0126579	0	0.0728522	0.0233624	0.0593059	0.0348455	0.0310509	0.0269147	0.00621114	0.0613426	0.0229572	0.150272	0.142553	0.023472	0.0347038	0.0523954	0.00801824	0.0937255	0.0128531
Adamts2	0.0984325	0.0928896	0.063249	0.227207	1.00459	0.245199	0.870453	0.576167	0.654192	0.327876	0.406898	0.275282	0.323414	0.0446779	0.0714574	0.0516203	0.179205	0.158608	0.143833	0.111681	0.035982
Adamts20	0	0.0232537	0.0126579	0	0.0260387	0.0140182	0.0219763	0.0268064	0.0186325	0.01615	0.0186325	0.0306857	0	0.011173	0.0200739	0.00938953	0.00991719	0.0120965	0.0148906	0.0288769	0.0102826
Adamts4	0.014084	0.0232537	0.0126579	0.0208318	0.0104165	0.0140182	0.00659336	0.0053619	0.00621114	0.00538355	0.00207039	0.00511507	0.00765299	0.011173	0.00376411	0.00938953	0.00826437	0.0120965	0.0068728	0.0252681	0.00771201
Adamts5	0	0	0.0884921	0	0.0364503	0.199606	0.0899884	0.0963655	0.0434646	0.0188414	0.0310509	0.00767256	0.00765299	0.0502582	0.110191	0.126424	0.0231384	0.0141124	0.106329	0.0397008	0.0257041
Adamts6	0.0281653	0.0232537	0	0	0.0104165	0.00934566	0.0021978	0.0241263	0.00310559	0.00807528	0.0207025	0.00511507	0.00510202	0	0.00878282	0.00469482	0.00330578	0.00403225	0.00916367	0	0.0154236
Adamts8	0	0	0	0.0416546	0.0208318	0.00467288	0.015384	0.00268096	0.00931664	0.0174957	0.0144922	0.0204589	0	0	0.00878282	0	0.00330578	0.00201613	0.00801824	0.0108301	0
Adamts9	0	0	0	0	0	0.0140182	0.0307644	0.0053619	0.012422	0.00403767	0.00621114	0.0153447	0	0	0.00752816	0.00469482	0.0181808	0.00201613	0.00114548	0	0
Adamtsl1	0.014084	0	0.0506113	0.0416546	0.0260387	0.0700362	0.0109888	0.0642988	0.058972	0.0779828	0.128014	0.00255754	0.0127548	0.0223445	0.0388861	0.042241	0.0858449	0.0604471	0.12908	0.0649363	0.0539584
Adamtsl2	0	0	0	0	0.0780457	0.0140182	0.12713	0.072323	0.046567	0.147513	0.0641382	0.0230159	0.0153055	0.016759	0.042647	0.0187782	0.00330578	0.00403225	0.0183266	0.00722015	0.00514137
Adamtsl4	0	0.0232537	0	0.0208318	0.00520831	0.0140182	0.00659336	0.0053619	0.00621114	0.010767	0.00414077	0.00255754	0.00255102	0.00558656	0.0112921	0.00938953	0.01157	0.00604835	0.0068728	0.021659	0.00771201
Adap1	0.26451	0.275569	0.441239	0.65948	0.567931	0.468638	0.542262	0.560069	0.552244	0.490222	0.489529	0.38195	0.301532	0.397287	0.558901	0.528974	0.481951	0.430159	0.389823	0.295327	0.301332
Adar	0.410877	0.207804	0.798481	0.65948	0.782309	0.778696	0.780004	0.88516	0.760076	0.790042	0.625145	0.642791	0.6788	0.795939	0.678276	0.785303	0.580131	0.591853	0.674024	0.420693	0.758157
Adarb1	0.549405	0.116019	0.371166	0.405465	0.476549	0.606909	0.373661	0.364527	0.489529	0.445421	0.356772	0.393832	0.414085	0.614266	0.332604	0.419511	0.349845	0.334455	0.382367	0.36038	0.419467
Adarb2	0.014084	0	0.213563	0.366725	0.0312449	0.0233624	0.0131864	0.0241263	0.099216	0.0228782	0.699347	0.941544	0.101865	0.016759	0.0138013	0.291624	0.171065	0.0201599	0.0435143	0.12602	0.151095
Adat1	0.0281653	0.207804	0.0884921	0.206855	0.119507	0.0560454	0.1053	0.0936966	0.102306	0.0685869	0.0847845	0.122456	0.056093	0.0558369	0.0877168	0.103104	0.0792558	0.0564217	0.0686745	0.0433078	0.0949728
Adat2	0	0	0.0379656	0.0208318	0.00520831	0.0373745	0.0109888	0.032166	0.0279467	0.01615	0.0165624	0.00511507	0.0357067	0.0335133	0.017565	0.023472	0.0165282	0.00806443	0.0194719	0.0036101	0.035982
Adck1	0.0984325	0.0464949	0.0884921	0.206855	0.0936132	0.121198	0.107485	0.128334	0.11157	0.134186	0.0950947	0.114837	0.13985	0.166823	0.108944	0.103104	0.113804	0.0906018	0.114299	0.0793391	0.0744812
Adck2	0.140384	0.0928896	0.201172	0.267627	0.145321	0.185844	0.1489	0.136307	0.163862	0.14485	0.193409	0.135138	0.165066	0.161311	0.131366	0.154316	0.159651	0.106653	0.126808	0.175985	0.112871
Adck5	0.140384	0.2979	0.0506113	0.103979	0.150473	0.148981	0.133668	0.13365	0.105395	0.127514	0.152616	0.114837	0.15247	0.13368	0.118917	0.0797277	0.0907843	0.126677	0.0858053	0.0865346	0.117978
Adcy1	0.609452	0.0232537	0.1763	0.186418	0.0728522	0.325972	0.185743	0.267573	0.148522	0.182035	0.142376	0.109754	0.177636	0.20526	0.212942	0.291624	0.128571	0.150639	0.134758	0.18664	0.301332
Adcy10	0.014084	0.0464949	0.0126579	0	0.00520831	0.0280337	0.0109888	0.00804281	0.012422	0.0121128	0.0269119	0.0127874	0.0229572	0.0279293	0.0150559	0.0328579	0.0165282	0.0362824	0.0251978	0.00722015	0.0257041
Adcy2	0.371666	0.207804	0.188751	0.590144	0.0572604	0.352469	0.100927	0.125674	0.376159	0.374747	0.600867	0.698764	0.546385	0.216189	0.949756	0.767477	0.580131	0.44852	0.314383	0.165311	0.269229
Adcy3	0	0.0232537	0.250535	0.32745	0.386164	0.267815	0.344777	0.351939	0.194425	0.277709	0.237915	0.240638	0.185165	0.2434	0.22764	0.209727	0.216487	0.186418	0.20363	0.0649363	0.151095
Adcy5	0.0703645	0.0464949	0.49813	0.186418	0.347152	0.17665	0.338551	0.318961	0.267003	0.224227	0.217737	0.208211	0.232591	0.248821	0.291946	0.250881	0.263071	0.22393	0.194645	0.13318	0.14601
Adcy6	0.0703645	0.0464949	0.0379656	0.0832372	0.119507	0.0700362	0.133668	0.117691	0.108483	0.10211	0.0724005	0.0689989	0.0764561	0.111501	0.122653	0.107772	0.113804	0.0684948	0.0526675	0.0433078	0.0642232
Adcy7	0.014084	0.0232537	0.163823	0.165905	0.267627	0.22246	0.239463	0.181311	0.20356	0.130184	0.138275	0.210713	0.0891675	0.139215	0.055179	0.182091	0.0528679	0.104648	0.161949	0.05052	0.0975317
Adcy8	0	0.116019	0.0884921	0.103979	0.129843	0.139732	0.116222	0.0830145	0.173048	0.171434	0.0682699	0.0613426	0.147425	0.0837011	0.0401398	0.250881	0.0677168	0.0624594	0.150632	0.0793391	0.10009
Adcy9	0.0563083	0.0928896	0.151321	0.0832372	0.0936132	0.139732	0.10967	0.0990337	0.11157	0.112816	0.0641382	0.0715502	0.106939	0.10039	0.102705	0.117103	0.0792558	0.0845766	0.0949318	0.0757398	0.110316
Adcyap1	0.537171	0.230511	0.720763	0.481212	0.994457	0.158218	0.456506	0.708624	0.230863	0.340616	0.875505	1.20536	0.16003	0.678559	1.89162	0.920655	0.965274	0.815745	1.02722	0.574389	0.0770446
Adcyap1r1	0.0844068	0.18499	0.418092	0.742399	0.616457	0.443283	0.559379	0.564682	0.478432	0.461261	0.485837	0.452436	0.240035	0.371298	0.345648	0.406548	0.256676	0.259185	0.409955	0.129601	0.308698
Add1	0.436692	0.612199	1.04957	0.924885	1.04759	0.847942	0.990399	0.875675	0.911786	0.882325	0.921777	0.899343	0.731473	0.816736	0.977336	0.949399	1.0566	0.882798	0.882183	0.839935	0.754201
Add2	0.423818	0.0928896	0.65991	0.758486	0.805767	0.861409	0.934734	0.902074	0.69687	0.780898	0.793865	0.733068	0.628679	0.816736	0.878709	0.89459	0.711884	0.552158	0.65913	0.574389	0.596401
Add3	0.126424	0.0928896	0.201172	0.0832372	0.165905	0.144358	0.235188	0.168108	0.160797	0.143518	0.160797	0.089395	0.0967876	0.17233	0.203117	0.200531	0.094076	0.17253	0.151765	0.158184	0.148553
Adgra1	0.0563083	0.207804	0.275002	0.554481	1.02792	0.430504	0.690948	0.937118	0.684429	0.909638	0.556715	0.445477	0.409387	0.547633	0.78887	0.549405	0.59277	0.504531	0.520305	0.190187	0.433587
Adgra2	0	0	0	0.0416546	0.0104165	0.0140182	0.00659336	0.0053619	0	0.00403767	0.00621114	0.00767256	0.00255102	0.00558656	0.00376411	0.00469482	0.00661152	0	0.00343642	0.0036101	0.00514137
Adgra3	0	0.0928896	0.0126579	0.0624594	0.0572604	0.0327045	0.0812293	0.0535936	0.0651712	0.0954137	0.0641382	0.0383538	0.0102039	0.0335133	0.0150559	0.0328579	0.039659	0.0161283	0.029778	0.021659	0.0308434
Adgrb1	0.0563083	0.725388	0.542601	0.462501	0.629474	0.481212	0.655365	0.607962	0.514294	0.557482	0.435389	0.400936	0.539737	0.58124	0.534968	0.589646	0.564568	0.424624	0.493982	0.546409	0.475456
Adgrb2	0.154316	0.116019	0.406439	0.481212	0.481212	0.39177	0.583843	0.499124	0.456074	0.399765	0.403075	0.321784	0.40468	0.443426	0.360992	0.453752	0.449203	0.299919	0.382367	0.15105	0.276663
Adgrb3	0.16822	0.116019	0.520483	0.481212	0.598956	0.567221	0.694465	0.515709	0.636308	0.445421	0.538771	0.565313	0.373881	0.600184	0.712358	0.371666	0.735248	0.6173	0.545308	0.40074	0.440617
Adgre5	0.014084	0.0928896	0	0.0208318	0	0	0.0021978	0	0.00310559	0	0.00207039	0	0	0.011173	0.00376411	0	0.00661152	0.0161283	0.00114548	0.0144399	0.00514137
Adgrg1	0.0844068	0.116019	0.201172	0.145321	0.391002	0.167441	0.456506	0.534505	0.212679	0.260828	0.291903	0.228193	0.101865	0.150272	0.203117	0.177471	0.126932	0.140665	0.154029	0.0649363	0.158716
Adgrg2	0.0703645	0.18499	0.0126579	0.0416546	0.0468579	0.065374	0.0439419	0.0562706	0.0310509	0.0390211	0.0703354	0.0127874	0.242514	0.072562	0.048914	0.089084	0.13021	0.100636	0.0171813	0.0577297	0.0924134
Adgrl1	0.930304	0.592607	1.10367	1.29447	1.20053	1.39014	1.32998	1.39962	1.08487	1.16108	1.07858	1.1088	1.10827	1.31964	1.22534	1.1671	1.07694	1.23868	1.08201	0.960749	1.04236
Adgrl2	0.0281653	0.385713	0.406439	0.32745	0.307625	0.551114	0.153246	0.496744	0.212679	0.218973	0.281963	0.162961	0.539737	0.542785	0.244727	0.32745	0.315406	0.313393	0.425739	0.104503	0.226841
Adgrl3	0.384799	0.470787	0.934071	0.836482	0.885052	0.735585	0.936229	0.731831	0.804706	0.904031	1.06844	0.698764	1.13382	1.21169	0.783189	0.992929	0.711884	0.937265	0.746561	0.562003	0.660441
Adgrv1	0	0	0.0126579	0	0.0208318	0	0.0219763	0.0241263	0.0217374	0.00807528	0.00207039	0.00255754	0.00510202	0	0.0050188	0.00469482	0.00330578	0.00201613	0.0068728	0.00722015	0.0128531
Adh5	0.384799	0.116019	0.163823	0.366725	0.129843	0.158218	0.131489	0.13365	0.099216	0.143518	0.168967	0.145269	0.134796	0.155794	0.145037	0.214318	0.149852	0.144656	0.10519	0.253591	0.123082
Adhfe1	0	0	0.0126579	0	0.0104165	0.00934566	0.0087911	0.00268096	0.0155273	0.010767	0.012422	0.00255754	0.00255102	0.011173	0.00878282	0	0.00330578	0.00201613	0.00916367	0.0036101	0.00514137
Adi1	0.0984325	0.0464949	0.250535	0.247466	0.181297	0.144358	0.207303	0.194482	0.126988	0.184682	0.199502	0.19317	0.134796	0.13368	0.137583	0.149675	0.125292	0.124677	0.117712	0.15105	0.117978
Adipor1	0.39787	0.385713	0.406439	0.462501	0.438898	0.356863	0.398185	0.431523	0.416431	0.392284	0.356772	0.331491	0.303971	0.376516	0.469397	0.362876	0.39157	0.347785	0.320923	0.370525	0.328263
Adipor2	0.0563083	0.139086	0.163823	0.247466	0.232281	0.185844	0.174931	0.202369	0.194425	0.16878	0.16284	0.107211	0.154991	0.20526	0.154962	0.140384	0.122011	0.128677	0.138163	0.207886	0.117978
Adk	0.57365	0.470787	0.1763	0.366725	0.196647	0.299252	0.23305	0.308744	0.22481	0.312519	0.199502	0.188146	0.222646	0.237971	0.225193	0.214318	0.133488	0.158608	0.183392	0.447053	0.229347
Adnp	0.014084	0	0.0126579	0	0.0312449	0.0280337	0.0505279	0.0562706	0.0527705	0.0470889	0.049669	0.0664473	0.0433538	0.0446779	0.0576844	0.0656805	0.0479155	0.0644715	0.036647	0.0324853	0.0282739
Adnp2	0.0844068	0	0.063249	0.0832372	0.0364503	0.0560454	0.0614997	0.072323	0.0279467	0.0645581	0.049669	0.0485742	0.056093	0.072562	0.0864669	0.0844068	0.0594691	0.080558	0.0572425	0.0541252	0.0642232
Ado	0.126424	0	0.1763	0.405465	0.109158	0.33483	0.1706	0.178672	0.169988	0.162142	0.119796	0.102124	0.294207	0.275819	0.13634	0.205131	0.144946	0.162589	0.125671	0.316014	0.194151
Adora1	0.16822	0.0928896	0.429693	0.32745	0.17104	0.455995	0.144551	0.0883568	0.188326	0.0913936	0.262003	0.277745	0.354757	0.376516	0.290742	0.549405	0.411434	0.176502	0.313292	0.257086	0.23185
Adora2b	0.014084	0.0928896	0.0253138	0.0208318	0	0.00934566	0.00439559	0.0107237	0.012422	0.0121128	0.0455329	0.01023	0.0127548	0	0.0112921	0.00938953	0.021486	0.0120965	0.00916367	0.0180496	0.00514137
Adpgk	0.0563083	0.0464949	0.0506113	0.227207	0.103979	0.0700362	0.107485	0.101701	0.102306	0.10211	0.115684	0.132603	0.112011	0.0837011	0.102705	0.112439	0.108876	0.0926095	0.0903695	0.0541252	0.0796074
Adprh	0.423818	0.491588	0.406439	0.499768	0.415063	0.443283	0.416431	0.499124	0.37326	0.365937	0.370357	0.345996	0.546385	0.508524	0.453549	0.500028	0.422067	0.432002	0.417333	0.343392	0.431239
Adprhl2	0.195927	0.2979	0.262788	0.206855	0.277668	0.276825	0.224483	0.244214	0.209641	0.247793	0.237915	0.255522	0.325836	0.318605	0.269015	0.200531	0.274236	0.182454	0.217077	0.267555	0.219317
Adprm	0.182091	0.207804	0.238246	0.124677	0.145321	0.23157	0.187903	0.183947	0.160797	0.16347	0.168967	0.160436	0.187672	0.183329	0.200658	0.191319	0.146582	0.182454	0.144967	0.0937255	0.143466
Adra1a	0.0281653	0	0.063249	0.0416546	0.109158	0	0.0549174	0.032166	0.046567	0.0846901	0.0889097	0.033242	0.00510202	0.011173	0.00376411	0	0.0132228	0.0181442	0.0400809	0.0036101	0.0488238
Adra1b	0	0.0232537	0.063249	0.186418	0.0676567	0.0327045	0.0417461	0.0776699	0.0341548	0.0739568	0.195441	0.0306857	0.0739123	0.17233	0.222746	0.107772	0.107232	0.19236	0.122261	0.0252681	0.0770446
Adra2a	0.042241	0	0.151321	0.0624594	0.0416546	0.0933224	0.10967	0.0375247	0.136224	0.0994323	0.0558715	0.104668	0.040805	0.0335133	0.0927153	0.0937593	0.0380074	0.233753	0.132487	0.0433078	0.0616576
Adra2c	0.014084	0	0.0758765	0.165905	0.0572604	0.097974	0.142376	0.0696488	0.160797	0.103449	0.128014	0.142737	0.0255074	0.0390962	0.0626942	0.00938953	0.00661152	0.0664833	0.0652458	0.0397008	0.0796074
Adrb1	0.0703645	0.0232537	0.0379656	0.145321	0.0624594	0.102624	0.0877992	0.0535936	0.0248422	0.107465	0.0393273	0.089395	0.0280575	0.066989	0.0138013	0.0375499	0.0132228	0.00806443	0.0560989	0.0108301	0.112871
Adrb2	0.014084	0.0464949	0	0	0.00520831	0.00467288	0.00659336	0.00804281	0	0.00134589	0.0144922	0.00511507	0.00510202	0	0.0401398	0.00938953	0.00330578	0.00403225	0.00229095	0.021659	0.00514137
Adrb3	0	0.0232537	0.063249	0	0.0572604	0.0373745	0.0812293	0.0375247	0.0434646	0.0174957	0.012422	0.00767256	0.00765299	0.016759	0.0100375	0.00469482	0.00826437	0.00806443	0.0194719	0.0144399	0.0128531
Adrm1	0.632941	0.491588	0.429693	0.554481	0.471876	0.455995	0.464441	0.54849	0.500571	0.42578	0.471004	0.454752	0.439769	0.443426	0.458088	0.49586	0.487855	0.466739	0.437251	0.48605	0.454615
Adsl	0.16822	0.139086	0.0884921	0.165905	0.191535	0.097974	0.161929	0.197113	0.151593	0.176737	0.146474	0.162961	0.104402	0.122598	0.140069	0.145031	0.126932	0.128677	0.146101	0.104503	0.143466
Adss	0.250881	0.0928896	0.55357	0.742399	0.567931	0.622551	0.540351	0.669931	0.544171	0.580561	0.507901	0.516385	0.548596	0.562107	0.586816	0.545336	0.511312	0.443026	0.546301	0.32288	0.567943
Adssl1	0.871379	0.139086	0.3474	0.124677	0.135006	0.267815	0.185743	0.19185	0.194425	0.291933	0.0744653	0.0868473	0.222646	0.254236	0.0727088	0.163589	0.151486	0.22393	0.239402	0.129601	0.264266
Aebp1	0	0	0.0126579	0	0.0104165	0.00934566	0.0087911	0.0134044	0	0.00807528	0.00207039	0.00255754	0.0127548	0	0.0125467	0.00469482	0.00495866	0.00403225	0.0068728	0.0108301	0.00257069
Aebp2	0.112439	0.253103	0.311399	0.307625	0.307625	0.365631	0.277734	0.283068	0.239927	0.251708	0.251983	0.240638	0.200191	0.2434	0.345648	0.31406	0.264668	0.210143	0.259395	0.183091	0.229347
Aen	0.154316	0.207804	0.213563	0.247466	0.191535	0.267815	0.205151	0.204996	0.154662	0.176737	0.213691	0.175567	0.27951	0.221644	0.269015	0.149675	0.206788	0.142661	0.151765	0.211418	0.138375
Aes	1.96765	1.75791	2.56792	2.22282	2.11597	2.28551	2.28669	2.18671	2.46015	2.16687	2.19191	2.13187	2.30793	2.46573	2.22408	2.24094	2.0919	2.34205	2.31692	2.19714	2.2393
AF529169	0.26451	0.0464949	0.0758765	0.206855	0.0520598	0.116558	0.131489	0.136307	0.176107	0.218973	0.0971556	0.102124	0.428127	0.302622	0.118917	0.177471	0.17595	0.142661	0.100632	0.0613334	0.143466
Afap1	0.0844068	0.16208	0.101094	0.165905	0.135006	0.167441	0.0746559	0.0509163	0.0930334	0.10211	0.113627	0.0485742	0.0789994	0.0614139	0.127633	0.060995	0.118729	0.104648	0.0595296	0.104503	0.0847315
Afap1l1	0.0281653	0.0928896	0.0379656	0	0.0208318	0.00934566	0.0241735	0.0294863	0.0434646	0.00942113	0.0186325	0.0179019	0.0229572	0.011173	0.017565	0.0281653	0.0280955	0.0282221	0.0251978	0.0252681	0.00514137
Afap1l2	0	0	0	0	0.0104165	0.0140182	0	0.0107237	0.00621114	0.00134589	0.00621114	0.00255754	0.00510202	0	0.0100375	0	0.0148755	0.0100805	0.00572735	0.193732	0.00771201
Afdn	0.31853	0.230511	0.55357	0.939089	0.697309	0.559184	0.759893	0.695826	0.654192	0.588574	0.696043	0.576267	0.570574	0.562107	0.641427	0.565602	0.63429	0.618984	0.581747	0.373899	0.578938
Aff1	0	0.069711	0	0.0208318	0.0156244	0.00467288	0.0131864	0.0214461	0.00310559	0.00672942	0.0207025	0.0179019	0.0102039	0.00558656	0.00376411	0.00469482	0.00495866	0.00604835	0.0103091	0.0180496	0.00771201
Aff2	0.0281653	0.0232537	0.225921	0.103979	0.103979	0.144358	0.10967	0.0883568	0.248973	0.0994323	0.0847845	0.091942	0.109475	0.0892669	0.0464074	0.246328	0.0874916	0.114668	0.0858053	0.0252681	0.102647
Aff3	0.042241	0	0.262788	0.65948	0.206855	0.23157	0.131489	0.173393	0.284948	0.184682	0.247969	0.233175	0.165066	0.248821	0.128878	0.223487	0.239039	0.150639	0.1427	0.0865346	0.135829
Aff4	0.701576	0.320088	0.670206	0.96706	0.935552	0.887967	0.962855	1.03539	0.816235	0.916151	0.884299	0.98583	0.697224	0.833167	0.859018	0.830691	0.890693	0.77951	0.791999	0.747819	0.769964
Afg1l	0.0281653	0.069711	0.126247	0.0416546	0.0728522	0.065374	0.118404	0.101701	0.105395	0.0994323	0.0703354	0.0664473	0.109475	0.0837011	0.0827162	0.0703645	0.084198	0.0865853	0.0766717	0.0577297	0.0693531
Afg3l1	0.237206	0.18499	0.262788	0.347152	0.32745	0.299252	0.359255	0.334225	0.24596	0.304814	0.301815	0.250567	0.235074	0.307958	0.323083	0.34964	0.31068	0.229826	0.260503	0.140333	0.219317
Afg3l2	0.16822	0.16208	0.225921	0.386164	0.322505	0.276825	0.307232	0.339297	0.251983	0.291933	0.225819	0.200696	0.259822	0.297278	0.320698	0.345215	0.316979	0.25333	0.241628	0.179539	0.264266
Afmid	0	0.0232537	0	0	0.0156244	0.00467288	0.0263706	0.0241263	0.0248422	0.00942113	0.0144922	0.00511507	0.00765299	0.011173	0.00752816	0.00469482	0.0148755	0.00604835	0.0103091	0.0144399	0.0179939
Aftph	0.154316	0.16208	0.520483	0.424624	0.429391	0.413361	0.420468	0.436416	0.42498	0.349503	0.399247	0.370015	0.318564	0.478712	0.393761	0.376051	0.357618	0.326813	0.366322	0.253591	0.301332
Aga	0.0703645	0.207804	0	0.0416546	0.0104165	0.0607104	0.0505279	0.0348455	0.077562	0.0376761	0.0393273	0.0179019	0.0255074	0.0558369	0.0188195	0.00469482	0.0347038	0.0282221	0.0309229	0.0433078	0.0385509
Agap1	0.500028	0.275569	0.564478	0.65948	0.567931	0.534876	0.664331	0.712868	0.544171	0.625892	0.545968	0.651199	0.778606	0.774851	1.03874	0.795899	0.910293	0.569516	0.519299	0.410736	0.484658
Agap2	0	0	0.0506113	0.0624594	0.0624594	0.0233624	0.0505279	0.066974	0.0279467	0.0497776	0.0620719	0.0460196	0.0357067	0.0502582	0.0413934	0.042241	0.0545184	0.0302373	0.0332127	0.021659	0.0308434
Agap3	0.474904	0.207804	0.976487	0.726148	1.02792	0.702467	0.96139	1.00113	1.0072	0.87374	0.850293	0.86134	0.687013	0.816736	0.704401	0.871379	0.787212	0.759518	0.910234	0.713954	0.797166
Agbl2	0	0	0	0	0.00520831	0	0	0	0	0.00672942	0.00414077	0.00255754	0.00255102	0.00558656	0.0112921	0	0.021486	0.0181442	0.00343642	0.00722015	0
Agbl3	0.042241	0.0232537	0.0758765	0.0416546	0.109158	0.046712	0.0943654	0.0963655	0.0806579	0.063215	0.0765298	0.0485742	0.0255074	0.0446779	0.0702058	0.042241	0.0528679	0.0443403	0.0560989	0.021659	0.0385509
Agbl4	0	0.116019	0.0253138	0.0208318	0.0987975	0.0560454	0.0680793	0.0830145	0.0620719	0.0726145	0.0703354	0.0460196	0.0739123	0.0558369	0.055179	0.0375499	0.042962	0.0362824	0.0526675	0.0108301	0.0385509
Agbl5	0.0281653	0	0.0253138	0.0832372	0.0936132	0.0327045	0.0483328	0.0749967	0.0434646	0.0511217	0.0517368	0.074101	0.0178562	0.0279293	0.0526733	0.0469311	0.0528679	0.0362824	0.0320678	0.00722015	0.0154236
Agfg1	0.26451	0.0232537	0.429693	0.386164	0.490509	0.409057	0.488081	0.573876	0.344101	0.405983	0.454201	0.46399	0.306407	0.345067	0.510752	0.474904	0.374645	0.321068	0.346949	0.253591	0.279137
Agfg2	0.112439	0.16208	0.262788	0.32745	0.32745	0.36125	0.359255	0.283068	0.281963	0.237335	0.339213	0.304725	0.335507	0.307958	0.416925	0.31406	0.399228	0.321068	0.243853	0.204351	0.23185
Aggf1	0.140384	0.0464949	0.49813	0.590144	0.317553	0.534876	0.422484	0.40938	0.38484	0.40474	0.348981	0.367622	0.528607	0.453562	0.422684	0.384799	0.399228	0.321068	0.343708	0.288404	0.449958
Agk	0.112439	0.207804	0.275002	0.124677	0.242411	0.321534	0.340627	0.356981	0.257998	0.325321	0.268002	0.248087	0.240035	0.323915	0.306352	0.269043	0.288541	0.284455	0.277082	0.207886	0.236854
Agl	0.291624	0.407253	0.1763	0.186418	0.424624	0.254261	0.363379	0.399478	0.29091	0.324043	0.358717	0.262944	0.182656	0.210727	0.256889	0.232638	0.184083	0.146651	0.198016	0.264068	0.148553
Agmat	0.0281653	0	0	0	0.00520831	0.0233624	0.0087911	0.00268096	0.00621114	0.00134589	0.00621114	0.01023	0.162549	0.355587	0.0138013	0.0375499	0.0297477	0.0342675	0.0148906	0.0036101	0.0257041
Ago1	0.0281653	0.069711	0.275002	0.267627	0.247466	0.267815	0.247999	0.228568	0.248973	0.205812	0.185274	0.230685	0.225134	0.194306	0.150001	0.228065	0.167806	0.204223	0.212599	0.12602	0.221827
Ago2	0.209727	0.116019	0.371166	0.554481	0.558975	0.451765	0.669688	0.72343	0.410715	0.572514	0.456074	0.527608	0.345147	0.386921	0.541524	0.376051	0.446203	0.351583	0.434116	0.236068	0.407639
Ago3	0.126424	0.207804	0.262788	0.32745	0.342238	0.272323	0.290406	0.303624	0.194425	0.285474	0.283953	0.292487	0.165066	0.20526	0.238632	0.246328	0.201931	0.18047	0.206995	0.18664	0.221827
Ago4	0.0984325	0.0464949	0.101094	0.0416546	0.119507	0.0933224	0.12931	0.104368	0.11157	0.116827	0.105395	0.135138	0.0891675	0.122598	0.127633	0.126424	0.07596	0.0765382	0.0869465	0.0685384	0.120531
Agpat1	0.112439	0.139086	0.250535	0.267627	0.227207	0.272323	0.213753	0.272745	0.236908	0.220287	0.215714	0.228193	0.197689	0.265042	0.282308	0.255429	0.261473	0.22393	0.227137	0.136757	0.191627
Agpat2	0	0	0.063249	0	0.0104165	0.0186905	0.0175815	0.0375247	0.0217374	0.02826	0.0269119	0.0127874	0.0255074	0.0502582	0.0263458	0.0375499	0.0446133	0.0342675	0.029778	0.0108301	0.0179939
Agpat3	0.0844068	0.139086	0.441239	0.462501	0.376461	0.551114	0.440555	0.508617	0.444813	0.475788	0.374227	0.321784	0.352357	0.478712	0.422684	0.462236	0.366918	0.315314	0.345869	0.350199	0.388603
Agpat4	0.278092	0.207804	0.45273	0.405465	0.549977	0.518508	0.521143	0.625889	0.387728	0.466114	0.545968	0.623726	0.462884	0.392109	0.58041	0.406548	0.528737	0.477602	0.417333	0.390706	0.402893
Agpat5	0.250881	0.275569	0.311399	0.366725	0.247466	0.33483	0.334393	0.339297	0.264003	0.297091	0.297854	0.238152	0.274597	0.307958	0.311141	0.340783	0.30437	0.25333	0.273772	0.204351	0.274187
Agps	0.112439	0.069711	0.0758765	0.186418	0.145321	0.130471	0.155418	0.173393	0.151593	0.132852	0.160797	0.089395	0.0815423	0.122598	0.116424	0.140384	0.115446	0.114668	0.0994921	0.0685384	0.0898533
Agrn	0.0703645	0.572809	0.1763	0.247466	0.252516	0.208761	0.250131	0.233789	0.302805	0.228163	0.189343	0.203202	0.162549	0.216189	0.172296	0.195927	0.184083	0.158608	0.193521	0.129601	0.191627
Agrp	0	0	0	0.0208318	0.0156244	0.0140182	0.0087911	0.0134044	0.00621114	0.00942113	0.012422	0.00511507	0.0102039	0.0223445	0.0163104	0	0.00991719	0.00806443	0.0125999	0	0.00771201
Agt	0.0844068	0.207804	0.0379656	0.0624594	0.0728522	0.097974	0.0943654	0.101701	0.11157	0.087372	0.107454	0.132603	0.0789994	0.144745	0.0789643	0.13108	0.084198	0.0523954	0.0766717	0.0577297	0.0693531
Agtpbp1	0.436692	0.253103	0.607506	0.836482	0.471876	0.622551	0.523072	0.594402	0.578918	0.522353	0.482138	0.454752	0.416431	0.433246	0.786032	0.720155	0.535954	0.419077	0.442465	0.32288	0.393375
Agtr2	0	0	0.0126579	0	0.00520831	0.00934566	0.00439559	0.032166	0.00621114	0.0659011	0.00414077	0	0.0102039	0.0223445	0.0263458	0.014084	0.00826437	0.0120965	0.00572735	0	0.0257041
Agtrap	0.0844068	0.0232537	0.0884921	0.0208318	0.0987975	0.0560454	0.0812293	0.117691	0.0341548	0.02826	0.0538043	0.0460196	0.0357067	0.072562	0.0802151	0.042241	0.115446	0.0221756	0.0538114	0.0108301	0.0488238
Ahctf1	0.16822	0.069711	0.163823	0.145321	0.267627	0.190436	0.235188	0.186583	0.267003	0.207129	0.179164	0.165484	0.15247	0.166823	0.205575	0.218905	0.171065	0.166567	0.181138	0.0793391	0.143466
Ahcy	0.014084	0.0232537	0.0253138	0.0832372	0.0364503	0.0793559	0.0329611	0.0535936	0.0155273	0.0430553	0.0269119	0.0689989	0.0433538	0.016759	0.0301084	0.0656805	0.0446133	0.0262067	0.029778	0.0252681	0.0513913
Ahcyl1	0.195927	0.364001	0.486866	0.693147	0.352057	0.634194	0.442555	0.446175	0.45045	0.505753	0.348981	0.326641	0.550805	0.488694	0.46488	0.537171	0.467123	0.355376	0.409955	0.447053	0.475456
Ahcyl2	0.223487	0.631584	0.429693	0.625145	0.453088	0.638059	0.591308	0.55313	0.514294	0.606761	0.489529	0.457065	0.585812	0.438341	0.543704	0.589646	0.461165	0.466739	0.47557	0.363765	0.484658
Ahdc1	0.250881	0.139086	0.299308	0.481212	0.490509	0.417658	0.361318	0.367038	0.387728	0.277709	0.433499	0.405662	0.311275	0.366071	0.382102	0.362876	0.425097	0.276698	0.286995	0.239579	0.219317
Ahi1	2.82922	2.5403	3.53389	2.86071	3.74441	3.09817	3.5061	3.48	3.58118	3.51506	3.64576	3.67859	2.88126	3.06437	3.29595	3.3872	3.42567	3.44356	3.48407	2.82755	3.30109
Ahnak2	0.0984325	0.364001	0.0379656	0.0624594	0.0468579	0.0513793	0.0417461	0.0455606	0.0434646	0.0349861	0.101276	0.0562363	0.066278	0.0558369	0.0526733	0.0469311	0.039659	0.0342675	0.0423699	0.629146	0.0488238
Ahr	0.014084	0.0928896	0.063249	0.0624594	0.211951	0.0186905	0.0680793	0.101701	0.046567	0.0672441	0.0579386	0.0230159	0.0306075	0.0279293	0.135097	0.0469311	0.039659	0.0282221	0.0515236	0.0288769	0.0205641
Ahsa1	0.901152	0.707042	0.854265	0.866565	0.794083	0.796311	0.822688	0.850714	0.850293	0.787	0.838274	0.868658	0.906403	0.766335	0.730119	0.727528	0.813161	0.82763	0.760685	0.955921	0.814398
Ahsa2	0.291624	0.320088	0.250535	0.405465	0.307625	0.258784	0.340627	0.346888	0.284948	0.279004	0.275986	0.248087	0.202691	0.318605	0.329037	0.278092	0.275828	0.227862	0.247189	0.18664	0.246843
AI314180	0.16822	0.707042	0.311399	0.424624	0.381317	0.317089	0.342703	0.369547	0.287931	0.363415	0.331376	0.2257	0.294207	0.339792	0.346831	0.423818	0.299629	0.274756	0.284794	0.221999	0.266748
AI413582	1.1347	1.07987	1.2663	1.52448	1.34639	1.21532	1.42979	1.44961	1.3096	1.24841	1.3808	1.46291	1.36325	1.23289	1.59594	1.35181	1.57849	1.32189	1.22147	1.2657	1.12959
AI429214	0	0	0	0	0.0156244	0	0.0109888	0.0160851	0.00931664	0.00269179	0.0103518	0.00255754	0.00510202	0.00558656	0.00627348	0.00469482	0.00165289	0	0.00343642	0	0.00257069
AI464131	0	0.0232537	0.0253138	0	0.0208318	0.0373745	0.0131864	0.0241263	0.00931664	0.00672942	0.0103518	0.01023	0.0204067	0	0.0213284	0.0187782	0.0132228	0.0120965	0.00801824	0.0144399	0.0154236
AI467606	0	0.0464949	0.0126579	0	0.196647	0	0.0746559	0.0910271	0.0651712	0.0215327	0.0517368	0.01023	0.0127548	0.0223445	0.0727088	0.00938953	0.0825508	0.0382971	0.00916367	0.0360932	0.00514137
AI480526	0.0984325	0.342124	0.163823	0.0832372	0.150473	0.185844	0.1402	0.168108	0.154662	0.154167	0.150569	0.205707	0.112011	0.144745	0.168585	0.103104	0.19058	0.122676	0.173244	0.0793391	0.148553
AI504432	0.423818	0.0232537	0.418092	1.0213	0.58129	0.827506	0.576349	0.576167	0.671895	0.63148	0.485837	0.355628	0.541955	0.355587	0.418078	0.470689	0.493743	0.315314	0.3813	0.236068	0.402893
AI593442	1.08445	0.945646	0.881374	0.774409	0.949646	1.35903	0.758205	1.14078	0.999165	0.999848	1.12807	1.05437	1.3003	1.51851	2.09927	1.18299	1.60178	1.48	1.04024	0.889011	0.87591
AI597479	0.250881	0.069711	0.101094	0.366725	0.135006	0.258784	0.190062	0.264985	0.191376	0.21108	0.229855	0.19317	0.210184	0.221644	0.226417	0.158954	0.235825	0.194339	0.140431	0.165311	0.161254
AI606181	0	0	0.0126579	0.0624594	0.0416546	0.0280337	0.0329611	0.0375247	0.0155273	0.0255692	0.0289815	0.0127874	0.00765299	0.00558656	0.0125467	0.0328579	0.0132228	0.00604835	0.0206171	0.0108301	0.0257041
AI837181	0.31853	0.0928896	0.382974	0.693147	0.361844	0.477028	0.41845	0.396996	0.376159	0.42208	0.337256	0.324213	0.497126	0.51837	0.386771	0.410877	0.393103	0.396766	0.38663	0.288404	0.333135
AI839979	0.014084	0.0464949	0	0	0	0.00934566	0.0087911	0.00268096	0.00931664	0.00942113	0.00828148	0.01023	0.0102039	0.00558656	0.0163104	0.0187782	0.00661152	0.0100805	0.00229095	0.0036101	0.00514137
AI854703	0.0703645	0.139086	0.188751	0.386164	0.206855	0.285812	0.222339	0.239005	0.18222	0.224227	0.189343	0.178085	0.192683	0.286565	0.204347	0.232638	0.239039	0.166567	0.223786	0.12602	0.173929
AI987944	0.0844068	0	0.0126579	0.0624594	0.103979	0.0513793	0.0746559	0.0749967	0.0744653	0.0524658	0.0868473	0.0944885	0.0611863	0.0614139	0.0939646	0.0469311	0.0693658	0.0544086	0.0652458	0.0757398	0.0565252
Aida	0.154316	0.342124	0.779414	0.536404	0.594555	0.634194	0.642736	0.630343	0.633738	0.539993	0.709218	0.632225	0.57494	0.547633	0.813244	0.742172	0.632922	0.598673	0.628002	0.236068	0.561316
Aif1	0	0.0232537	0.0126579	0.0624594	0.0416546	0.0280337	0.0241735	0.0348455	0.00931664	0.0174957	0.0186325	0.0281293	0.00510202	0.011173	0.0351245	0.00938953	0.0297477	0.0100805	0.0183266	0.0252681	0.0257041
Aif1l	0	0.0232537	0.0126579	0.0208318	0.0104165	0.00934566	0.0087911	0.0053619	0.00621114	0.010767	0.012422	0.01023	0	0.00558656	0.00627348	0.00469482	0.01157	0.00403225	0.00801824	0.00722015	0.0154236
Aifm1	0.154316	0.18499	0.0884921	0.206855	0.0624594	0.153601	0.133668	0.157525	0.11157	0.116827	0.123906	0.127531	0.132267	0.0948299	0.130122	0.135733	0.131849	0.114668	0.0960721	0.147479	0.125633
Aifm2	0.014084	0	0.0884921	0.103979	0.0728522	0.0513793	0.0351576	0.0375247	0.0558715	0.0443999	0.0558715	0.033242	0.0433538	0.066989	0.0626942	0.0844068	0.0924303	0.0503819	0.0320678	0.0324853	0.0590916
Aifm3	0.16822	0.512193	0.1763	0.0416546	0.103979	0.162831	0.10967	0.22334	0.151593	0.243874	0.0806579	0.0817503	0.066278	0.166823	0.0476607	0.089084	0.0726633	0.0382971	0.082381	0.0829374	0.115425
Aig1	0.830691	0.253103	0.323445	0.518166	0.65948	0.534876	0.617203	0.669931	0.599994	0.644821	0.410715	0.350816	0.57712	0.58124	0.479528	0.340783	0.465635	0.560856	0.453898	0.524373	0.541299
Aim2	0.042241	0	0.0758765	0	0	0	0.00439559	0.00268096	0.00621114	0.00942113	0.0227724	0.00511507	0.00255102	0.016759	0.0100375	0.00938953	0.01157	0.0100805	0.00572735	0.0108301	0.00257069
Aimp1	0.910938	0.631584	0.700725	0.980829	0.766468	0.87475	0.893752	0.856513	0.827676	0.904031	0.827676	0.772504	1.00877	0.995063	0.843616	0.816872	0.835049	0.898378	0.84029	1.04024	0.92257
Aimp2	0.140384	0.18499	0.163823	0.206855	0.176171	0.17665	0.202999	0.19185	0.179164	0.195258	0.138275	0.135138	0.235074	0.20526	0.19081	0.209727	0.171065	0.18047	0.144967	0.229039	0.153637
Aip	0.871379	0.470787	1.43226	1.00795	1.09548	1.21277	1.15574	1.16997	1.16335	1.00333	0.981595	1.11336	0.972134	0.943188	1.07378	1.44783	1.15421	1.07624	1.14051	1.08919	1.04397
Airn	0	0.0464949	0.0126579	0	0.0676567	0.0140182	0.0395501	0.0160851	0.0186325	0.0309506	0.0331202	0.0766513	0.00510202	0.0279293	0.0301084	0.0375499	0.0297477	0.0262067	0.0229075	0.0397008	0.0205641
Ajap1	0.0703645	0.116019	0.3474	0.481212	0.758486	0.36125	0.547984	0.536842	0.402118	0.452745	0.626867	0.872302	0.373881	0.216189	0.471652	0.609452	0.551743	0.340175	0.294685	0.22552	0.259295
Ak1	0.767477	0.491588	0.788977	1.08605	0.88872	0.939617	0.918184	1.14853	0.771947	0.96	0.694389	0.556505	0.865045	0.727425	0.796412	0.731201	0.876691	0.800753	0.735885	0.89408	0.730258
AK157302	0	0	0.0379656	0.0208318	0.0416546	0.0513793	0.0307644	0.0268064	0.0434646	0.0349861	0.049669	0.0562363	0.040805	0.0446779	0.055179	0.023472	0.0495665	0.0302373	0.0309229	0.0324853	0.0436879
Ak2	0.291624	0.116019	0.188751	0.227207	0.211951	0.258784	0.194378	0.218106	0.176107	0.218973	0.213691	0.218213	0.197689	0.210727	0.236192	0.186707	0.235825	0.219995	0.18677	0.221999	0.204233
Ak3	0.154316	0.116019	0.126247	0.206855	0.160765	0.0840133	0.194378	0.117691	0.139301	0.110141	0.146474	0.0970344	0.056093	0.128141	0.126388	0.107772	0.136763	0.080558	0.0960721	0.13318	0.115425
Ak4	0.140384	0.0232537	0.138794	0.103979	0.196647	0.158218	0.205151	0.154876	0.239927	0.126179	0.160797	0.180602	0.0459022	0.0614139	0.243509	0.177471	0.159651	0.194339	0.20363	0.0613334	0.0744812
Ak5	0.223487	0.116019	0.464165	0.145321	0.376461	0.158218	0.321885	0.246816	0.341169	0.267329	0.211666	0.228193	0.0688232	0.0614139	0.15992	0.287119	0.105589	0.110661	0.20363	0.0829374	0.204233
Ak6	0.26451	0.0464949	0.262788	0.462501	0.361844	0.36125	0.344777	0.318961	0.364543	0.308669	0.285943	0.253045	0.311275	0.297278	0.36922	0.384799	0.431146	0.324899	0.304549	0.236068	0.279137
Ak8	0.0281653	0	0.0379656	0	0.0156244	0.00467288	0.00439559	0.0187657	0.00310559	0.010767	0.00828148	0.00511507	0.00510202	0.011173	0.0125467	0.014084	0.01157	0	0.00572735	0.0036101	0.0102826
Akain1	0.014084	0.0928896	0.113679	0.165905	0.0208318	0.276825	0.0812293	0.109699	0.0806579	0.112816	0.0248422	0.0230159	0.0280575	0.0558369	0.0225828	0.089084	0.01157	0.0262067	0.114299	0.0541252	0.138375
Akap1	0.0703645	0.0232537	0.0379656	0.0832372	0.0832372	0.097974	0.0921771	0.0990337	0.139301	0.0752989	0.099216	0.0766513	0.0866263	0.0892669	0.0952137	0.0937593	0.0907843	0.0564217	0.0583861	0.0469142	0.0565252
Akap10	0	0.0928896	0.113679	0.103979	0.0780457	0.0746969	0.0834197	0.072323	0.0620719	0.0659011	0.078594	0.0613426	0.0764561	0.0502582	0.0626942	0.0750469	0.0512173	0.0382971	0.0560989	0.0397008	0.0642232
Akap11	0.701576	0.5326	1.2463	1.03451	1.34639	1.10328	1.27547	1.18356	1.07921	1.1005	1.11588	1.07954	0.925758	0.976767	1.09358	1.08445	0.931876	0.916569	1.08131	0.863391	0.988029
Akap12	0.278092	0.385713	0.188751	0.267627	0.206855	0.434771	0.111855	0.107034	0.15773	0.159485	0.287931	0.299835	0.249941	0.18882	0.217846	0.340783	0.234216	0.100636	0.156293	0.443774	0.196673
Akap13	0.209727	0.320088	0.101094	0.0416546	0.109158	0.130471	0.114038	0.0990337	0.0961252	0.10211	0.168967	0.0485742	0.0611863	0.0390962	0.0727088	0.0844068	0.061119	0.0463544	0.0983522	0.0793391	0.0565252
Akap17b	0.0844068	0.0928896	0.238246	0.32745	0.247466	0.227017	0.213753	0.293361	0.197472	0.236026	0.247969	0.228193	0.172611	0.237971	0.30755	0.305103	0.271049	0.219995	0.200262	0.15105	0.176461
Akap2	0	0	0	0.0416546	0.0416546	0.0607104	0.0285675	0.0375247	0.0186325	0.0363312	0.0144922	0.0230159	0.0433538	0	0.0213284	0.023472	0.0132228	0.0141124	0.0194719	0.0180496	0.0205641
Akap5	0.0703645	0.0464949	0.0506113	0.0624594	0.165905	0.097974	0.120587	0.130992	0.139301	0.13952	0.0538043	0.0255727	0.0789994	0.072562	0.0877168	0.0750469	0.0957215	0.0946168	0.0926509	0.05052	0.0872927
Akap6	0.537171	0.275569	0.750361	0.726148	0.71796	0.717269	0.784991	0.787392	0.691904	0.67011	0.616511	0.623726	0.553011	0.714241	0.727172	0.771059	0.689507	0.642396	0.620373	0.492485	0.609391
Akap7	0.930304	0.275569	0.225921	0.462501	0.536404	0.325972	0.303033	0.31641	0.37326	0.317646	0.249976	0.223206	0.850373	0.557294	0.65585	0.406548	0.548881	0.311472	0.205874	0.608043	0.539063
Akap8	0.209727	0.385713	0.382974	0.307625	0.317553	0.325972	0.265019	0.32151	0.284948	0.286767	0.239927	0.282666	0.240035	0.334509	0.276271	0.34964	0.294881	0.237675	0.259395	0.214947	0.254319
Akap8l	0.57365	1.12165	0.509336	0.742399	0.693147	0.481212	0.557484	0.682928	0.554928	0.63148	0.585089	0.507363	0.541955	0.542785	0.520693	0.49586	0.580131	0.541669	0.534344	0.397399	0.532339
Akap9	1.21414	0.743527	1.38555	1.20626	1.38384	1.12817	1.30693	1.38708	1.3808	1.26471	1.32564	1.33065	1.23374	1.34173	1.40074	1.37659	1.2242	1.44544	1.36294	1.18975	1.30823
Akip1	0.042241	0	0.0506113	0.0416546	0.0364503	0.0327045	0.0527228	0.0402036	0.0279467	0.0322959	0.0269119	0.0255727	0.0484504	0.0390962	0.0351245	0.00938953	0.0297477	0.0161283	0.0251978	0.0324853	0.0308434
Akirin1	0.305103	0.385713	0.564478	0.499768	0.513581	0.439031	0.631838	0.610213	0.631164	0.510509	0.565627	0.547658	0.517418	0.562107	0.663017	0.565602	0.570242	0.543421	0.51224	0.319449	0.459263
Akirin2	0.632941	0.18499	0.564478	0.642396	0.766468	0.579215	0.725789	0.744349	0.70182	0.635938	0.782945	0.71903	0.719467	0.562107	0.828048	0.613388	0.658749	0.720341	0.548287	0.505297	0.567943
Akr1a1	2.10491	1.59865	2.00161	2.19111	2.01053	2.13145	2.17616	2.27277	2.01325	2.12431	2.11559	2.03928	2.07661	2.08107	2.18581	2.07633	2.19363	2.13075	2.00236	2.05636	2.01503
Akr1b10	0.0703645	0.116019	0.138794	0.32745	0.247466	0.227017	0.179258	0.262394	0.148522	0.182035	0.130068	0.091942	0.117079	0.122598	0.125144	0.195927	0.12037	0.0765382	0.0778138	0.12602	0.148553
Akr1b3	0.31853	0.207804	0.126247	0.206855	0.332387	0.22246	0.317705	0.429072	0.233887	0.364676	0.303794	0.170528	0.237555	0.355587	0.337354	0.103104	0.285367	0.282517	0.230485	0.204351	0.156177
Akr1cl	0	0	0	0	0.0156244	0.00934566	0.0021978	0.00268096	0	0.00403767	0.00414077	0.00255754	0.00255102	0.00558656	0.0012547	0.00938953	0.00661152	0.00403225	0.0103091	0.0036101	0.00514137
Akr1e1	0.154316	0.0464949	0.0379656	0.0832372	0.135006	0.135103	0.133668	0.112364	0.099216	0.104788	0.11157	0.074101	0.127208	0.105947	0.101457	0.0750469	0.0809034	0.0865853	0.0994921	0.12602	0.112871
Akr7a5	0.345215	0.0928896	0.394732	0.287682	0.467193	0.294778	0.307232	0.396996	0.338234	0.345698	0.463551	0.400936	0.289314	0.366071	0.373911	0.31406	0.397698	0.322984	0.320923	0.302237	0.306245
Akt1	0.462236	0.230511	0.564478	0.758486	0.381317	0.563207	0.57447	0.607962	0.439163	0.506943	0.474721	0.412734	0.395241	0.557294	0.411153	0.466467	0.435673	0.381786	0.390886	0.309132	0.442955
Akt1s1	0.423818	0.16208	0.520483	0.32745	0.481212	0.404746	0.454518	0.43886	0.422133	0.415901	0.389651	0.372406	0.313707	0.339792	0.51628	0.402213	0.414477	0.34208	0.354499	0.246591	0.352549
Akt2	0.112439	0.0232537	0.113679	0.103979	0.114334	0.158218	0.107485	0.104368	0.105395	0.0846901	0.101276	0.0817503	0.114545	0.066989	0.13261	0.149675	0.12037	0.110661	0.112022	0.118854	0.0642232
Akt3	0.0844068	0.116019	0.151321	0.462501	0.196647	0.23157	0.226627	0.215487	0.18222	0.17276	0.154662	0.173048	0.172611	0.221644	0.161158	0.163589	0.159651	0.170543	0.148367	0.143907	0.173929
Aktip	0.891298	0.864833	1.44928	1.14763	1.40573	1.26032	1.37994	1.36801	1.511	1.24125	1.16747	1.11032	1.41825	1.29144	1.26602	1.14016	1.28096	1.27686	1.26897	1.1342	1.21246
AL589670.1	0	0.0464949	0	0.0624594	0	0.0186905	0.0087911	0	0.0186325	0.00403767	0.0144922	0.00511507	0.00510202	0	0.00250941	0	0.00330578	0.00403225	0.00916367	0.0108301	0.00257069
AL589692.1	0.0281653	0	0	0.0208318	0.0364503	0	0.00439559	0.0214461	0.012422	0.0121128	0.0103518	0.0127874	0.0102039	0.016759	0.00878282	0.023472	0.00991719	0.00403225	0.0217623	0.0036101	0.0128531
AL590144.2	0.014084	0	0	0.0208318	0.00520831	0	0.0021978	0.00268096	0	0.00269179	0.012422	0	0.00765299	0.011173	0.0163104	0.00469482	0.00826437	0.00604835	0.00114548	0	0.00257069
AL591952.3	0.0281653	0	0	0.0416546	0.0416546	0.0327045	0.0285675	0.0294863	0.0279467	0.0269147	0.0434646	0.0383538	0.0306075	0.0335133	0.0188195	0.0375499	0.039659	0.0342675	0.0274879	0.0036101	0.0231342
AL603867.1	0	0.0232537	0.0126579	0	0	0.0140182	0.0021978	0.00268096	0	0.00538355	0.00414077	0.00255754	0.00765299	0.011173	0.0112921	0.00938953	0.00495866	0.00604835	0.0068728	0	0.00257069
AL732506.1	0	0.0464949	0.0253138	0.0416546	0.0156244	0.00934566	0.0219763	0.0134044	0.00310559	0.0188414	0.012422	0.0153447	0.00510202	0.011173	0.0213284	0.00469482	0.021486	0.0161283	0.0125999	0	0.0128531
Alad	0.154316	0.139086	0.163823	0.227207	0.247466	0.23157	0.209454	0.239005	0.24596	0.196578	0.241939	0.19568	0.197689	0.20526	0.141311	0.177471	0.13021	0.186418	0.220433	0.108093	0.214294
Alas1	0.154316	0.0928896	0.0506113	0.0832372	0.140166	0.130471	0.164098	0.149576	0.105395	0.150175	0.109512	0.152857	0.124677	0.128141	0.145037	0.177471	0.151486	0.160599	0.117712	0.13318	0.10776
Alcam	0.656125	0.961253	1.97092	1.83154	1.85566	1.60295	0.631838	1.43279	2.00507	1.158	0.600867	0.789928	1.86808	1.65241	1.88606	1.21157	1.55802	1.65618	1.75692	0.948646	0.998077
Aldh16a1	0	0.069711	0.0253138	0	0.00520831	0.0420437	0.0131864	0.0241263	0.00931664	0.0134585	0.0165624	0.0204589	0.00765299	0.0335133	0.0326166	0.0328579	0.039659	0.0181442	0.0103091	0.0180496	0.0128531
Aldh18a1	0.014084	0.0464949	0.0253138	0.0208318	0.0936132	0.0700362	0.0549174	0.0990337	0.0682699	0.0900532	0.0765298	0.091942	0.0688232	0.0335133	0.045154	0.0750469	0.0693658	0.0503819	0.0538114	0.108093	0.0436879
Aldh1a1	0.042241	0	0.0379656	0	0.0208318	0.0420437	0.0219763	0.0375247	0.046567	0.0228782	0.0248422	0.033242	0.0127548	0.016759	0.0238371	0.0187782	0.0198334	0.0221756	0.0320678	0.0469142	0.0179939
Aldh1a2	0	0	0	0	0.00520831	0.0140182	0.153246	0.392026	0	0	0	0	0.00255102	0	0.00250941	0.00938953	0	0.00201613	0.0068728	0	0.00257069
Aldh1a3	0	0.864833	0.0253138	0.0416546	0.0364503	0.046712	0.0505279	0.0535936	0.046567	0.0417107	0.0310509	0.0204589	0.0331572	0.0335133	0.0626942	0.0750469	0.084198	0.0825674	0.0229075	0.0252681	0.0590916
Aldh1b1	0	0.0232537	0.0253138	0.103979	0.0260387	0.046712	0.0417461	0.0562706	0.0310509	0.0376761	0.0207025	0.0230159	0.0255074	0.0279293	0.0225828	0.023472	0.0231384	0.0302373	0.0251978	0.00722015	0.0385509
Aldh1l1	0	0	0.0126579	0.0832372	0.0260387	0.0420437	0.0175815	0.0214461	0.0279467	0.01615	0.0103518	0.0281293	0.0102039	0.0223445	0.0225828	0.00938953	0.0132228	0.0302373	0.0171813	0.0288769	0.0179939
Aldh1l2	0.0281653	0.069711	0.0126579	0	0.0260387	0.0420437	0.0219763	0.0134044	0.0279467	0.0174957	0.0269119	0.01023	0.0127548	0.00558656	0.0100375	0.00938953	0.021486	0.0241912	0.0194719	0.0288769	0.0102826
Aldh2	0.278092	0.275569	0.188751	0.206855	0.25756	0.195023	0.256518	0.130992	0.233887	0.158155	0.181201	0.215714	0.220156	0.155794	0.174768	0.237206	0.17595	0.18047	0.219314	0.229039	0.204233
Aldh3a2	0.0844068	0.116019	0.0884921	0.227207	0.0676567	0.130471	0.107485	0.0990337	0.102306	0.114153	0.105395	0.130068	0.142376	0.161311	0.120162	0.0797277	0.0907843	0.0745278	0.0892286	0.0757398	0.0770446
Aldh3b1	0	0	0	0	0.0780457	0.00467288	0.00659336	0.0107237	0	0.00942113	0.0103518	0.01023	0.00255102	0.00558656	0.0112921	0.00469482	0.00330578	0	0.00229095	0.0144399	0.00514137
Aldh3b2	0.0281653	0.0232537	0.063249	0	1.07017	0.046712	0.315613	0.306185	0.209641	0.250403	0.295871	0.0715502	0.0229572	0.0558369	0.453549	0.0469311	0.243857	0.18047	0.0583861	0.0469142	0.0513913
Aldh4a1	0.0563083	0	0.063249	0.0624594	0.0624594	0.0373745	0.0746559	0.0936966	0.0527705	0.0484333	0.0372585	0.0638951	0.0433538	0.0558369	0.0777135	0.0469311	0.0594691	0.0684948	0.0400809	0.0252681	0.046256
Aldh5a1	0.140384	0.0232537	0.138794	0.443637	0.307625	0.325972	0.307232	0.421706	0.254992	0.317646	0.255994	0.233175	0.192683	0.216189	0.211715	0.223487	0.290128	0.221963	0.228253	0.165311	0.251829
Aldh6a1	0.0984325	0.16208	0.0379656	0.0832372	0.17104	0.0933224	0.153246	0.144271	0.0930334	0.0913936	0.123906	0.102124	0.104402	0.0892669	0.125144	0.042241	0.0973667	0.108657	0.082381	0.0937255	0.0667884
Aldh7a1	0.140384	0.253103	0.113679	0.165905	0.155621	0.139732	0.133668	0.128334	0.120824	0.122172	0.136224	0.140205	0.106939	0.111501	0.168585	0.13108	0.144946	0.114668	0.123398	0.129601	0.0975317
Aldh9a1	0.0844068	0.069711	0.0506113	0.165905	0.140166	0.0840133	0.133668	0.115028	0.0744653	0.13952	0.0682699	0.0995796	0.109475	0.0892669	0.0889667	0.13108	0.107232	0.0765382	0.082381	0.0829374	0.0744812
Aldoa	3.44719	2.64083	2.78273	2.99407	2.49605	2.98606	2.68881	2.6573	2.71779	2.75146	2.73372	2.61662	3.07045	3.05601	2.71801	2.74992	2.83366	2.8854	2.86053	3.20524	2.97781
Aldob	0	0.0232537	0	0.0208318	0.00520831	0.0186905	0.015384	0.0214461	0.0155273	0.0148043	0.0103518	0.00767256	0.0153055	0.0279293	0.0112921	0.0328579	0.00826437	0.0120965	0.016036	0	0.00257069
Aldoc	1.31713	1.61657	1.34921	1.81184	1.15959	1.27737	1.18189	1.19848	1.58675	1.19737	1.06334	0.778334	1.64248	1.49967	0.764099	0.965109	1.12154	1.52866	1.69446	1.74641	1.44478
Alg1	0.154316	0.0928896	0.163823	0.103979	0.140166	0.097974	0.124949	0.13365	0.11157	0.123508	0.11157	0.112296	0.144901	0.10039	0.140069	0.121765	0.141674	0.0906018	0.0960721	0.100912	0.0821697
Alg10b	0.0703645	0.0928896	0.063249	0.103979	0.165905	0.135103	0.164098	0.13365	0.120824	0.132852	0.138275	0.124994	0.16003	0.122598	0.167348	0.13108	0.136763	0.124677	0.0789557	0.0757398	0.0949728
Alg11	0.042241	0.069711	0.3474	0.287682	0.30265	0.356863	0.290406	0.34436	0.332357	0.281593	0.303794	0.28758	0.29665	0.334509	0.349196	0.300616	0.291713	0.268924	0.227137	0.136757	0.286551
Alg12	0.042241	0.0232537	0.0506113	0.0624594	0.0572604	0.0280337	0.0680793	0.0402036	0.0403617	0.0659011	0.0517368	0.0383538	0.0459022	0.0781328	0.0388861	0.0563083	0.042962	0.0362824	0.036647	0.0324853	0.0257041
Alg13	0	0.069711	0.0506113	0.0416546	0.0208318	0.0420437	0.0461375	0.0482387	0.049669	0.0403659	0.041396	0.0460196	0.0306075	0.0446779	0.0539262	0.0375499	0.0446133	0.0463544	0.0435143	0.021659	0.0411195
Alg14	0.0563083	0.0464949	0.101094	0.103979	0.17104	0.181249	0.181421	0.24161	0.151593	0.13952	0.144425	0.150328	0.15247	0.10039	0.185879	0.126424	0.138401	0.146651	0.0983522	0.129601	0.133281
Alg2	0.384799	0.139086	0.788977	1.03451	1.22894	0.970935	0.973069	1.13455	0.978871	1.07607	0.917504	0.848444	0.918752	0.849415	0.865313	0.806422	0.789702	0.787131	0.827734	0.688085	0.866757
Alg3	0.042241	0.0464949	0.0253138	0.124677	0.0572604	0.046712	0.0263706	0.072323	0.0434646	0.0591848	0.0455329	0.0460196	0.038256	0.066989	0.0626942	0.0375499	0.0545184	0.0342675	0.045803	0.0324853	0.0411195
Alg5	0.154316	0.0928896	0.126247	0.287682	0.181297	0.208761	0.179258	0.202369	0.173048	0.16347	0.193409	0.185633	0.144901	0.20526	0.199428	0.140384	0.208405	0.146651	0.1427	0.12602	0.128183
Alg6	0.014084	0.0232537	0.0758765	0.186418	0.0780457	0.0886688	0.0899884	0.0616232	0.049669	0.0739568	0.078594	0.0792011	0.0789994	0.0502582	0.0977114	0.0703645	0.0891381	0.106653	0.0709599	0.0541252	0.0667884
Alg8	0	0.0232537	0.0379656	0.0208318	0.0312449	0.0186905	0.0175815	0.0375247	0.00931664	0.0201871	0.0144922	0.033242	0.00510202	0.0335133	0.042647	0.0187782	0.0247908	0.0241912	0.0206171	0.0288769	0.0231342
Alg9	0.0281653	0.0464949	0.0379656	0.0416546	0.135006	0.0793559	0.0877992	0.120353	0.083753	0.0887127	0.105395	0.0792011	0.0535458	0.0614139	0.0877168	0.0937593	0.122011	0.0705061	0.0789557	0.0613334	0.0539584
Alk	0	0	0	0	0.00520831	0.00467288	0	0.0053619	0.0217374	0.00672942	0.0165624	0.0485742	0.0153055	0.016759	0.00752816	0.0281653	0.00165289	0.00806443	0.0103091	0.0036101	0
Alkal2	0	0	0.0126579	0	0	0.00467288	0	0	0	0	0.00621114	0.00255754	0	0	0.0112921	0.00938953	0.0247908	0.00201613	0.0068728	0	0.00257069
Alkbh1	0.0563083	0.449795	0.335446	0.462501	0.381317	0.33483	0.404281	0.404434	0.402118	0.384782	0.356772	0.386709	0.257354	0.275819	0.389103	0.362876	0.386964	0.362947	0.322012	0.18664	0.325824
Alkbh2	0.0984325	0	0.126247	0.0832372	0.135006	0.0933224	0.164098	0.13365	0.163862	0.138187	0.13212	0.117377	0.0942482	0.0892669	0.182178	0.163589	0.143311	0.114668	0.108607	0.0757398	0.10009
Alkbh3	0.112439	0.16208	0.0126579	0.0832372	0.0572604	0.107271	0.0899884	0.0535936	0.0806579	0.0645581	0.099216	0.0664473	0.071368	0.0948299	0.0702058	0.0937593	0.0710147	0.0403117	0.0732449	0.0613334	0.0642232
Alkbh4	0	0	0.0379656	0	0.0312449	0.0186905	0.0329611	0.0294863	0.0434646	0.033641	0.0289815	0.0255727	0.0280575	0.016759	0.0376323	0.0187782	0.039659	0.0362824	0.0229075	0.0324853	0.0257041
Alkbh5	0.701576	0.2979	0.49813	0.758486	0.598956	0.575225	0.648159	0.691538	0.636308	0.588574	0.638874	0.735063	0.506169	0.628241	0.703404	0.57365	0.704021	0.67694	0.663798	0.63214	0.605071
Alkbh6	0.656125	0.572809	0.586114	0.642396	0.585722	0.626441	0.613526	0.725535	0.605226	0.550505	0.609574	0.690588	0.546385	0.508524	0.675235	0.712749	0.646562	0.622347	0.574905	0.508488	0.572349
Alkbh7	0.423818	0.207804	0.710775	0.481212	0.376461	0.680012	0.526924	0.529822	0.48676	0.458831	0.424031	0.509622	0.766955	0.623595	0.598504	0.745812	0.613648	0.464924	0.531344	0.608043	0.539063
Alkbh8	0.223487	0.364001	0.201172	0.366725	0.381317	0.352469	0.359255	0.367038	0.338234	0.315084	0.321552	0.307167	0.340331	0.227093	0.35274	0.250881	0.315406	0.290262	0.22937	0.161749	0.318495
Alms1	0.0703645	0.18499	0.138794	0.0208318	0.109158	0.111916	0.10967	0.0509163	0.0682699	0.0752989	0.11157	0.089395	0.0611863	0.066989	0.0651985	0.0937593	0.061119	0.0705061	0.0732449	0.0757398	0.0590916
Alox5ap	0.0281653	0.0232537	0.0506113	0.287682	0.0728522	0.0513793	0.0987406	0.0990337	0.083753	0.063215	0.0620719	0.0306857	0.0306075	0.0837011	0.0889667	0.0797277	0.0924303	0.0584345	0.0332127	0.0144399	0.035982
Alox8	0	0	0.063249	0.0208318	0	0.0327045	0.0109888	0.0107237	0.071368	0.0887127	0.00828148	0.00255754	0.0306075	0.0390962	0.0200739	0.023472	0.0181808	0.0161283	0.0412254	0.0108301	0.0488238
Aloxe3	0.042241	0	0.0884921	0.103979	0.0832372	0.0233624	0.0483328	0.0749967	0.0961252	0.0605283	0.0579386	0.0638951	0.0484504	0.0223445	0.0301084	0.0375499	0.0479155	0.0544086	0.0526675	0.0433078	0.0565252
Als2	0.195927	0.0464949	0.0758765	0.0624594	0.0572604	0.0513793	0.0439419	0.0535936	0.0620719	0.0457445	0.049669	0.0562363	0.056093	0.0502582	0.0464074	0.060995	0.0495665	0.0443403	0.0492355	0.0433078	0.0513913
Als2cl	0	0.0464949	0	0.0208318	0.0364503	0.00934566	0.0175815	0.0241263	0.0186325	0.0215327	0.0248422	0.0281293	0.0178562	0.0335133	0.0200739	0.014084	0.0181808	0.0141124	0.00801824	0.0288769	0.0436879
Alyref	0.331901	0.0464949	0.509336	0.572395	0.585722	0.502011	0.524999	0.596669	0.536066	0.460047	0.515205	0.520881	0.546385	0.609584	0.559983	0.504187	0.553172	0.472177	0.472486	0.343392	0.521083
Alyref2	0.112439	0.0464949	0.113679	0.247466	0.201753	0.199606	0.164098	0.146924	0.15773	0.160813	0.179164	0.200696	0.165066	0.18882	0.152482	0.145031	0.162915	0.156617	0.159687	0.0865346	0.156177
Amacr	0.0984325	0	0.0506113	0.0832372	0.0624594	0.0420437	0.0593059	0.0830145	0.0527705	0.0779828	0.0724005	0.0587897	0.0357067	0.0558369	0.0388861	0.0328579	0.0512173	0.0745278	0.036647	0.0613334	0.0385509
Ambra1	0.0844068	0.253103	0.138794	0.0832372	0.140166	0.144358	0.159759	0.162819	0.139301	0.142185	0.109512	0.175567	0.170097	0.194306	0.151242	0.16822	0.133488	0.114668	0.125671	0.0757398	0.0924134
Amd1	0.278092	0	0.163823	0.247466	0.237349	0.17665	0.247999	0.19185	0.18222	0.16347	0.183238	0.205707	0.172611	0.221644	0.199428	0.195927	0.197069	0.184436	0.173244	0.140333	0.196673
Amd2	0.0281653	0.139086	0.0758765	0.186418	0.0728522	0.0560454	0.0790386	0.0642988	0.0744653	0.0752989	0.0765298	0.091942	0.066278	0.072562	0.0977114	0.0750469	0.0891381	0.0624594	0.0583861	0.0288769	0.0565252
Amdhd2	0.16822	0.253103	0.225921	0.227207	0.227207	0.153601	0.179258	0.160172	0.176107	0.222914	0.229855	0.210713	0.147425	0.210727	0.216621	0.163589	0.205169	0.184436	0.160818	0.13318	0.135829
Amer1	0.154316	0.069711	0.126247	0.103979	0.124677	0.107271	0.0987406	0.125674	0.105395	0.107465	0.109512	0.127531	0.132267	0.0781328	0.0877168	0.121765	0.108876	0.0906018	0.114299	0.0793391	0.123082
Amer2	0.474904	0.275569	0.49813	0.518166	0.642396	0.510276	0.528848	0.601194	0.592118	0.64814	0.606096	0.591499	0.483492	0.483709	0.682322	0.617316	0.563147	0.520528	0.581747	0.758948	0.578938
Amer3	0.0844068	0.0232537	0.126247	0.0208318	0.0832372	0.0700362	0.0943654	0.0963655	0.0806579	0.0752989	0.0600054	0.0587897	0.0789994	0.0781328	0.106449	0.0656805	0.0677168	0.0604471	0.0766717	0.0541252	0.0796074
Amfr	0.436692	0.116019	0.359307	0.462501	0.545463	0.455995	0.474321	0.532165	0.44199	0.495013	0.446694	0.461684	0.366725	0.397287	0.469397	0.380428	0.399228	0.332546	0.365249	0.239579	0.347707
Amh	0	0	0.0126579	0	0.0104165	0.0140182	0.0087911	0.0134044	0.00621114	0.00672942	0.012422	0.00511507	0.00765299	0	0.00376411	0	0.00826437	0.00403225	0.00458189	0.00722015	0.00257069
Amhr2	0	0.0232537	0.0253138	0.0208318	0	0.0840133	0.015384	0.0053619	0.0155273	0.0793246	0	0.0127874	0.00510202	0.0223445	0.0112921	0.014084	0.00991719	0.0141124	0.00458189	0.00722015	0.0154236
Amigo1	0.112439	0.275569	0.0884921	0.287682	0.272651	0.208761	0.25439	0.239005	0.18222	0.224227	0.187309	0.213215	0.249941	0.232536	0.19081	0.237206	0.156387	0.178486	0.195769	0.143907	0.214294
Amigo2	0.014084	0.0928896	0.1763	0.462501	0.237349	0.046712	0.250131	0.236398	0.320568	0.346967	0.251983	0.514133	0.132267	0.355587	0.379764	0.13108	0.250272	0.120675	0.1495	0.0937255	0.123082
Ammecr1	0.0984325	0	0.0506113	0.0832372	0.0364503	0.0373745	0.0439419	0.0348455	0.133147	0.225539	0.0620719	0.035798	0.0357067	0.0558369	0.0714574	0.0281653	0.094076	0.0684948	0.0355023	0.0397008	0.0334128
Ammecr1l	0.182091	0.230511	0.138794	0.267627	0.317553	0.272323	0.239463	0.24161	0.242945	0.229475	0.213691	0.2257	0.202691	0.254236	0.265381	0.214318	0.230998	0.152632	0.191271	0.111681	0.186576
Amn	0.0703645	0.069711	0.311399	0.267627	0.176171	0.272323	0.359255	0.460737	0.254992	0.348235	0.0744653	0.102124	0.269678	0.402455	0.195736	0.282608	0.551743	0.406085	0.367395	0.0793391	0.414742
Amn1	0.223487	0.207804	0.275002	0.386164	0.481212	0.267815	0.394113	0.399478	0.320568	0.329152	0.393493	0.302281	0.249941	0.350332	0.422684	0.241769	0.354511	0.322984	0.279287	0.232555	0.234353
Amot	0	0.0232537	0	0.0208318	0.0156244	0.00934566	0.0219763	0.0053619	0.0155273	0.010767	0.0207025	0.0127874	0.0280575	0.0446779	0.0188195	0	0.0330518	0.0302373	0.00801824	0.00722015	0.0179939
Amotl1	0.331901	0.0928896	0.359307	0.366725	0.6806	0.356863	0.576349	0.433971	0.594747	0.509321	0.593871	0.433833	0.385769	0.458614	0.956494	0.663785	0.521494	0.515209	0.395135	0.353596	0.219317
Amotl2	0.0703645	0	0.0379656	0.165905	0.0987975	0.23157	0.0899884	0.0830145	0.11157	0.0954137	0.103336	0.0970344	0.142376	0.150272	0.103953	0.126424	0.117088	0.108657	0.082381	0.0829374	0.0719174
Ampd2	0.0563083	0.16208	0.3474	0.186418	0.381317	0.421947	0.402251	0.424164	0.38195	0.363415	0.287931	0.304725	0.212679	0.302622	0.358636	0.287119	0.362272	0.288327	0.260503	0.197274	0.31115
Ampd3	0.0281653	0.069711	0.063249	0.145321	0.0936132	0.0700362	0.0790386	0.0963655	0.108483	0.0685869	0.0538043	0.0434646	0.0815423	0.0781328	0.0989601	0.107772	0.0990117	0.0705061	0.0618163	0.0433078	0.0565252
Amph	0.474904	0.230511	0.817311	0.774409	1.25119	0.731938	0.956983	1.19848	0.909635	1.1284	0.795418	0.748961	0.670547	0.820861	1.04661	1.02615	0.968569	0.759518	0.96239	0.829387	0.554666
Amt	0.126424	0.139086	0.138794	0.0832372	0.0987975	0.107271	0.118404	0.117691	0.102306	0.106126	0.109512	0.0995796	0.127208	0.105947	0.0939646	0.0750469	0.115446	0.114668	0.122261	0.0937255	0.120531
Amy1	0.042241	0.139086	0.113679	0.124677	0.155621	0.0746969	0.107485	0.125674	0.0682699	0.0994323	0.0950947	0.104668	0.0789994	0.13368	0.0764625	0.0750469	0.07596	0.0664833	0.082381	0.0180496	0.0847315
Amz1	0.0281653	0.0464949	0.201172	0.0208318	0.0728522	0.0420437	0.0329611	0.0268064	0.154662	0.0913936	0.125961	0.091942	0.0484504	0.0558369	0.0864669	0.042241	0.113804	0.118673	0.0595296	0.0144399	0.0539584
Amz2	0.154316	0.139086	0.299308	0.32745	0.356955	0.281321	0.336472	0.40938	0.293888	0.272523	0.325485	0.338752	0.242514	0.232536	0.248379	0.200531	0.234216	0.263084	0.314383	0.200814	0.239353
Anapc1	0.140384	0.275569	0.138794	0.206855	0.201753	0.23157	0.23091	0.290791	0.163862	0.234716	0.229855	0.2257	0.172611	0.183329	0.248379	0.177471	0.224554	0.138668	0.163079	0.168871	0.186576
Anapc10	0.209727	0	0.213563	0.103979	0.191535	0.22246	0.196535	0.183947	0.185274	0.14485	0.237915	0.137672	0.185165	0.161311	0.194505	0.163589	0.171065	0.162589	0.137028	0.111681	0.191627
Anapc11	1.60727	1.06562	1.86542	1.7147	1.80852	1.81252	1.77518	1.84853	1.73893	1.70299	1.75365	1.82409	1.67251	1.79342	1.79518	1.71889	1.76704	1.67458	1.79759	1.78716	1.777
Anapc13	1.06724	0.779191	1.14824	1.30504	1.01464	1.27495	0.974522	1.04382	1.01915	1.11013	0.951321	0.902909	1.39824	1.18074	0.948066	1.14016	1.05557	0.975072	1.03519	1.16537	1.21105
Anapc15	0.0703645	0.116019	0.188751	0.247466	0.201753	0.23157	0.252261	0.272745	0.287931	0.218973	0.217737	0.175567	0.284415	0.270435	0.282308	0.259972	0.280601	0.200271	0.191271	0.118854	0.166327
Anapc16	0.278092	0.16208	0.700725	0.590144	0.629474	0.543012	0.746339	0.742269	0.628587	0.596553	0.730403	0.688537	0.517418	0.503584	0.66608	0.593624	0.514226	0.524067	0.565089	0.44049	0.609391
Anapc2	0.237206	0.364001	0.225921	0.347152	0.232281	0.409057	0.305133	0.374558	0.296863	0.284181	0.266003	0.280206	0.316136	0.307958	0.295553	0.27357	0.263071	0.247466	0.209237	0.168871	0.229347
Anapc4	0.0703645	0.342124	0.238246	0.287682	0.211951	0.263302	0.275618	0.252016	0.22178	0.225539	0.231871	0.203202	0.202691	0.144745	0.239852	0.223487	0.206788	0.218027	0.212599	0.13318	0.23185
Anapc5	0.656125	0.725388	0.73069	0.924885	0.896029	0.717269	0.77667	0.758829	0.816235	0.706819	0.804706	0.784142	0.717457	0.762058	0.767936	0.723846	0.739109	0.665502	0.672169	0.611073	0.724215
Anapc7	0.0563083	0.16208	0.1763	0.145321	0.124677	0.181249	0.177095	0.202369	0.133147	0.166126	0.197472	0.208211	0.192683	0.122598	0.148761	0.149675	0.159651	0.164579	0.150632	0.0901306	0.133281
Angel1	0	0	0.0379656	0.0208318	0.0208318	0.0607104	0.0285675	0.0375247	0.0186325	0.0296054	0.0186325	0.0179019	0.0331572	0.0279293	0.0238371	0.0281653	0.0198334	0.0181442	0.0274879	0.0144399	0.0179939
Angel2	0.384799	0.407253	0.371166	0.424624	0.424624	0.409057	0.484159	0.506247	0.413575	0.409706	0.446694	0.438497	0.437445	0.433246	0.479528	0.440968	0.397698	0.389286	0.340463	0.246591	0.338
Angpt1	0	0	0.113679	0	0.00520831	0.0233624	0.0087911	0.00804281	0.00621114	0.0269147	0.0269119	0.0255727	0.0357067	0.0279293	0.0213284	0.00469482	0.00826437	0.0262067	0.114299	0	0.0154236
Angpt2	0	0	0	0	0.0104165	0	0.0109888	0.0053619	0.00621114	0.010767	0.00621114	0.0153447	0	0.00558656	0.00878282	0.00938953	0.00495866	0.00201613	0.0103091	0	0.00771201
Angptl4	0	0.0464949	0.0126579	0	0.0104165	0.00467288	0.0087911	0.0134044	0.0155273	0.010767	0.00414077	0.00511507	0.00510202	0.011173	0.0050188	0.00469482	0.00661152	0.00806443	0.00458189	0	0.00514137
Angptl6	0.195927	0.16208	0.287176	0.145321	0.410268	0.267815	0.392075	0.377061	0.364543	0.286767	0.366482	0.302281	0.232591	0.254236	0.317117	0.300616	0.255076	0.286392	0.268249	0.207886	0.23185
Ank	0.182091	0.230511	0.49813	0.572395	0.287682	0.563207	0.373661	0.354461	0.495057	0.458831	0.268002	0.272818	0.281963	0.443426	0.340911	0.367274	0.264668	0.35727	0.340463	0.236068	0.279137
Ank1	0.487502	0.116019	0.138794	0.145321	0.129843	0.36125	0.161929	0.160172	0.209641	0.156826	0.164883	0.117377	0.252413	0.313286	0.141311	0.228065	0.135126	0.132675	0.193521	0.111681	0.184049
Ank2	1.59086	1.85459	1.8956	1.70741	1.9159	2.04241	2.01955	2.21138	1.9993	1.91048	1.86769	1.93831	1.99815	2.0797	2.04962	1.9323	1.8994	1.8082	1.84138	1.83318	1.84414
Ank3	1.33113	1.00701	1.37957	1.59166	1.35398	1.20765	1.28793	1.42672	1.32974	1.25907	1.35405	1.31153	1.29901	1.4659	1.38902	1.33344	1.44216	1.23976	1.22271	1.28812	1.28864
Ankef1	0.042241	0.207804	0.0758765	0.0832372	0.0520598	0.0373745	0.0351576	0.0455606	0.0527705	0.0417107	0.0476011	0.0383538	0.038256	0.0502582	0.0301084	0.042241	0.0446133	0.0201599	0.0320678	0.0360932	0.0488238
Ankfy1	0.014084	0.897723	0.163823	0.145321	0.217042	0.167441	0.202999	0.231179	0.173048	0.222914	0.16284	0.188146	0.180146	0.13368	0.203117	0.223487	0.177578	0.174516	0.140431	0.129601	0.105204
Ankhd1	0.209727	0.18499	0.163823	0.165905	0.227207	0.236118	0.209454	0.225954	0.18222	0.213713	0.185274	0.188146	0.217665	0.216189	0.204347	0.241769	0.159651	0.158608	0.200262	0.147479	0.178991
Ankib1	0.112439	0.116019	0.225921	0.145321	0.272651	0.185844	0.309329	0.239005	0.230863	0.209764	0.273992	0.255522	0.217665	0.17233	0.276271	0.259972	0.185708	0.164579	0.164209	0.161749	0.186576
Ankle2	0.042241	0.0232537	0.151321	0.186418	0.160765	0.107271	0.181421	0.170751	0.130068	0.127514	0.148522	0.155384	0.117079	0.18882	0.135097	0.112439	0.123652	0.120675	0.100632	0.0577297	0.0898533
Ankmy1	0	0	0.0126579	0	0	0	0.0021978	0.0053619	0.00310559	0.00269179	0.00207039	0.00255754	0	0.0223445	0.0012547	0.00938953	0	0.00806443	0.00343642	0.00722015	0.00257069
Ankmy2	0.126424	0.18499	0.262788	0.267627	0.222127	0.272323	0.235188	0.329145	0.251983	0.267329	0.291903	0.253045	0.247466	0.323915	0.305154	0.282608	0.251874	0.255283	0.231601	0.183091	0.184049
Ankra2	0.621235	0.572809	0.670206	0.676397	1.06697	0.641915	0.927236	0.868041	0.825395	0.818142	1.00986	0.975739	0.733465	0.66043	1.00517	0.774632	0.877863	0.75642	0.691543	0.69098	0.689544
Ankrd10	0.154316	0.491588	0.287176	0.462501	0.490509	0.317089	0.410363	0.453467	0.361631	0.392284	0.354826	0.475486	0.421116	0.329216	0.408841	0.39787	0.37773	0.309549	0.360954	0.281467	0.289019
Ankrd11	1.30296	1.06562	1.2463	1.3565	1.21766	1.40104	1.32672	1.39462	1.28433	1.27871	1.22257	1.28292	1.21023	1.13928	1.37539	1.45824	1.34239	1.31686	1.23075	1.33526	1.30303
Ankrd12	1.30296	0.761461	1.38555	1.25119	1.18023	1.24551	1.16826	1.20439	1.26663	1.06947	1.13774	1.19121	1.32843	1.36339	1.22194	1.25197	1.13894	1.26427	1.13585	1.2807	1.06157
Ankrd13a	0.0281653	0.069711	0.0379656	0.124677	0.0832372	0.135103	0.0790386	0.0963655	0.0930334	0.087372	0.0682699	0.0842991	0.0484504	0.0948299	0.0914659	0.0703645	0.0973667	0.0503819	0.0663888	0.15105	0.0513913
Ankrd13b	0.014084	0.207804	0.0884921	0.124677	0.124677	0.158218	0.144551	0.176033	0.102306	0.127514	0.142376	0.0944885	0.101865	0.166823	0.179709	0.158954	0.128571	0.124677	0.135893	0.0973192	0.0975317
Ankrd13c	0.16822	0.207804	0.299308	0.443637	0.312593	0.276825	0.379813	0.356981	0.284948	0.295802	0.323519	0.245605	0.220156	0.302622	0.311141	0.278092	0.313831	0.233753	0.247189	0.158184	0.234353
Ankrd13d	0.182091	0.364001	0.299308	0.307625	0.297668	0.276825	0.328145	0.326602	0.299835	0.289351	0.22178	0.228193	0.232591	0.355587	0.326657	0.241769	0.32954	0.299919	0.244965	0.165311	0.251829
Ankrd16	0.0984325	0.0464949	0.151321	0.0832372	0.145321	0.111916	0.118404	0.107034	0.154662	0.106126	0.105395	0.109754	0.0840846	0.0837011	0.110191	0.112439	0.113804	0.0986303	0.117712	0.0865346	0.120531
Ankrd17	0.57365	0.725388	0.845114	0.774409	0.949646	0.861409	0.84358	0.856513	0.850293	0.815156	0.715766	0.758814	0.766955	0.833167	0.786032	0.939885	0.784717	0.728254	0.767699	0.614098	0.787506
Ankrd2	0.112439	0	0.0379656	0	0.103979	0.0607104	0.0263706	0.0375247	0.0310509	0.02826	0.0269119	0.0306857	0.040805	0.0446779	0.0601895	0.0656805	0.0495665	0.0564217	0.029778	0.0108301	0.0308434
Ankrd23	0	0	0.0126579	0.0208318	0	0	0.00659336	0	0.00310559	0.00538355	0.00828148	0.00511507	0	0.00558656	0.0050188	0.00469482	0.00165289	0.00201613	0.00229095	0	0
Ankrd24	0.291624	0.572809	0.441239	0.405465	0.347152	0.502011	0.426511	0.433971	0.390612	0.388535	0.469143	0.331491	0.364335	0.503584	0.40421	0.402213	0.484905	0.334455	0.42364	0.312575	0.364618
Ankrd26	0.291624	0.069711	0.429693	0.462501	0.438898	0.33483	0.365438	0.336762	0.326468	0.344428	0.27798	0.292487	0.252413	0.297278	0.294351	0.287119	0.299629	0.255283	0.311108	0.172429	0.328263
Ankrd27	0.0703645	0.116019	0.0506113	0.186418	0.0832372	0.0607104	0.0899884	0.0883568	0.0620719	0.0726145	0.0744653	0.033242	0.0535458	0.0558369	0.0664505	0.0937593	0.061119	0.0825674	0.0549552	0.05052	0.0565252
Ankrd28	0.0281653	0.069711	0.0253138	0.0624594	0.0832372	0.0560454	0.0790386	0.0910271	0.077562	0.0524658	0.0703354	0.0664473	0.0789994	0.0335133	0.0777135	0.0563083	0.0627687	0.0564217	0.0743873	0.0901306	0.0488238
Ankrd29	0.0703645	0	0.0126579	0.287682	0.0728522	0.162831	0.0768474	0.112364	0.0620719	0.106126	0.0434646	0.0153447	0.127208	0.155794	0.0877168	0.0656805	0.0973667	0.0705061	0.0732449	0.129601	0.133281
Ankrd33b	0	0.0464949	0.0884921	0.0416546	0.155621	0	0.103114	0.085686	0.0620719	0.0242237	0.012422	0	0.0306075	0.011173	0.0050188	0.014084	0.00991719	0.00403225	0.0148906	0	0.0102826
Ankrd34a	0.345215	0.0232537	0.275002	0.32745	0.282679	0.272323	0.292514	0.362014	0.254992	0.26473	0.249976	0.240638	0.244991	0.297278	0.196967	0.200531	0.255076	0.218027	0.190147	0.136757	0.186576
Ankrd34b	0.16822	0.069711	0.250535	0.536404	0.467193	0.559184	0.34685	0.303624	0.24596	0.325321	0.113627	0.175567	0.600929	0.392109	0.126388	0.345215	0.180831	0.206197	0.232716	0.190187	0.45694
Ankrd34c	0.014084	0.069711	0.0253138	0.0416546	0.0728522	0.0560454	0.100927	0.0482387	0.0341548	0.140853	0.128014	0.104668	0.117079	0.128141	0.0727088	0.042241	0.0710147	0.0986303	0.0492355	0.0324853	0.0257041
Ankrd35	0.014084	0.0464949	0.0379656	0.103979	0.0832372	0.0560454	0.0987406	0.0482387	0.046567	0.0349861	0.049669	0.0664473	0.00765299	0.0558369	0.0839665	0.0187782	0.042962	0.0382971	0.0423699	0.0144399	0.0411195
Ankrd37	0.195927	0.2979	0.250535	0.287682	0.181297	0.236118	0.267141	0.272745	0.18222	0.254316	0.187309	0.223206	0.217665	0.259643	0.28713	0.228065	0.243857	0.200271	0.191271	0.108093	0.239353
Ankrd39	0.16822	0.139086	0.262788	0.165905	0.267627	0.245199	0.265019	0.298497	0.24596	0.256922	0.293888	0.358031	0.222646	0.20526	0.344465	0.282608	0.256676	0.229826	0.210358	0.193732	0.241851
Ankrd40	0.0984325	0.139086	0.225921	0.227207	0.267627	0.30372	0.239463	0.262394	0.206602	0.267329	0.189343	0.205707	0.249941	0.221644	0.279894	0.269043	0.269455	0.247466	0.176629	0.22552	0.23185
Ankrd42	0.0281653	0.0232537	0.0884921	0.0208318	0.150473	0.0607104	0.10967	0.144271	0.0558715	0.10211	0.0827214	0.112296	0.0535458	0.0614139	0.0514202	0.0281653	0.0561688	0.0503819	0.0595296	0.0252681	0.0436879
Ankrd44	0.112439	0.275569	0.238246	0.0832372	0.186418	0.167441	0.159759	0.154876	0.191376	0.16878	0.150569	0.170528	0.149948	0.13368	0.430723	0.16822	0.159651	0.136671	0.126808	0.0829374	0.138375
Ankrd45	0.126424	0.0464949	0.0506113	0	0.103979	0.102624	0.138023	0.173393	0.0651712	0.132852	0.099216	0.0434646	0.066278	0.117051	0.145037	0.112439	0.17595	0.0845766	0.0778138	0.0433078	0.0949728
Ankrd46	0.549405	0.364001	0.807926	0.836482	0.774409	0.753692	0.736097	0.819391	0.816235	0.741681	0.757691	0.801435	0.697224	0.865484	0.7183	0.820338	0.833842	0.697979	0.77816	0.617117	0.701865
Ankrd49	0.126424	0.230511	0.063249	0.124677	0.114334	0.0700362	0.138023	0.136307	0.102306	0.126179	0.168967	0.142737	0.112011	0.122598	0.130122	0.135733	0.136763	0.114668	0.116574	0.111681	0.0872927
Ankrd50	0.182091	0.069711	0.323445	0.247466	0.252516	0.111916	0.269262	0.24161	0.179164	0.204494	0.16284	0.147799	0.124677	0.0781328	0.0977114	0.177471	0.156387	0.114668	0.147234	0.108093	0.143466
Ankrd52	0	0	0.0253138	0.0208318	0.0104165	0	0.0373539	0.0402036	0.0248422	0.0174957	0.0144922	0.0306857	0.0153055	0.011173	0.0250915	0.00938953	0.0231384	0.0120965	0.0183266	0.0144399	0.0102826
Ankrd54	0.0984325	0.207804	0.188751	0.124677	0.30265	0.158218	0.267141	0.362014	0.236908	0.289351	0.260001	0.282666	0.170097	0.166823	0.208032	0.191319	0.200311	0.166567	0.181138	0.136757	0.143466
Ankrd55	0.042241	0.407253	0.151321	0.103979	0.129843	0.097974	0.111855	0.197113	0.185274	0.158155	0.134173	0.122456	0.112011	0.183329	0.13261	0.13108	0.135126	0.112665	0.169858	0.0577297	0.117978
Ankrd6	0.042241	0	0.238246	0.186418	0.25756	0.321534	0.305133	0.27791	0.323519	0.226851	0.251983	0.228193	0.397604	0.291925	0.342096	0.250881	0.245462	0.184436	0.159687	0.0397008	0.186576
Ankrd9	0.0563083	0.385713	0.188751	0.124677	0.114334	0.167441	0.12713	0.107034	0.15773	0.127514	0.13212	0.0868473	0.170097	0.210727	0.152482	0.16822	0.162915	0.126677	0.155161	0.140333	0.14601
Anks1	0.0281653	0.0464949	0.0126579	0.0208318	0.0416546	0.0607104	0.0263706	0.0375247	0.0372585	0.063215	0.0455329	0.035798	0.0739123	0.0223445	0.0476607	0.0281653	0.0380074	0.0624594	0.0332127	0.0288769	0.0539584
Anks1b	0.57365	0.491588	0.96811	0.881374	0.932005	0.575225	1.34294	1.50883	0.99715	1.30484	1.00051	0.457065	0.739427	0.893175	1.62534	1.10983	1.38833	0.815745	0.94006	1.0605	0.769964
Anks3	0.0984325	0.385713	0.201172	0.227207	0.196647	0.285812	0.265019	0.32151	0.239927	0.243874	0.24596	0.277745	0.264753	0.150272	0.248379	0.296123	0.242252	0.19236	0.234946	0.12602	0.209266
Anks6	0	0	0.0126579	0.0208318	0.0312449	0.0233624	0.0219763	0.0187657	0.0248422	0.0134585	0.0289815	0.0255727	0.0127548	0.011173	0.0188195	0.00938953	0.00991719	0.0322525	0.0125999	0.00722015	0.0128531
Ankzf1	0.0281653	0.207804	0.126247	0.103979	0.124677	0.130471	0.164098	0.154876	0.133147	0.140853	0.148522	0.145269	0.119613	0.155794	0.148761	0.149675	0.158019	0.134673	0.122261	0.0865346	0.130733
Anln	0.0281653	0.0232537	0	0.0416546	0.0364503	0	0.0285675	0.0375247	0.0372585	0.0296054	0.0310509	0.0179019	0.0280575	0.016759	0.0288542	0.0328579	0.0330518	0.0181442	0.0240527	0.0973192	0.0154236
Ano1	0	0.139086	0.0126579	0	0	0.0140182	0.00439559	0.0053619	0.00931664	0.00269179	0.00207039	0.00255754	0.00510202	0.016759	0.00878282	0	0.00330578	0	0.00229095	0.0180496	0.0128531
Ano10	0	0.139086	0.0379656	0.0208318	0.0884264	0.046712	0.0549174	0.0803425	0.0403617	0.103449	0.0662042	0.035798	0.040805	0.0390962	0.0802151	0.0328579	0.0313998	0.0604471	0.0492355	0.0469142	0.046256
Ano2	0	0	0	0	0.0104165	0	0.0197789	0	0	0.033641	0.00207039	0	0	0	0	0	0.00165289	0.00604835	0.00572735	0	0
Ano3	0.209727	0.116019	0.113679	0	0.150473	0.046712	0.120587	0.0455606	0.227837	0.0484333	0.0765298	0.033242	0.0611863	0.105947	0.0439006	0.103104	0.0198334	0.0362824	0.0880876	0.0649363	0.143466
Ano4	0.014084	0.16208	0.0253138	0.0624594	0.0416546	0.046712	0.0614997	0.117691	0.0341548	0.0551537	0.0455329	0.0664473	0.0255074	0.011173	0.0276	0.0563083	0.057819	0.0181442	0.0663888	0.0577297	0.046256
Ano5	0	0	0	0.0416546	0.00520831	0.00934566	0.0087911	0.0187657	0.0186325	0.0188414	0.00621114	0.01023	0.0127548	0.011173	0.0125467	0.0187782	0.00826437	0.00806443	0.016036	0.0036101	0
Ano6	0.112439	0.342124	0.0506113	0.247466	0.0468579	0.065374	0.118404	0.0990337	0.0868473	0.0846901	0.146474	0.0562363	0.129738	0.105947	0.236192	0.186707	0.213256	0.112665	0.110884	0.0324853	0.0898533
Ano7	0.014084	0	0.0126579	0	0.0364503	0.0233624	0.0219763	0.0455606	0.00621114	0.0228782	0	0.00255754	0.0178562	0.0335133	0.0376323	0.023472	0.0495665	0.0201599	0.0125999	0.0144399	0.0205641
Ano8	0.042241	0.069711	0.0884921	0.145321	0.155621	0.158218	0.155418	0.157525	0.11774	0.164798	0.0971556	0.119917	0.132267	0.117051	0.115178	0.107772	0.0957215	0.0986303	0.0983522	0.0829374	0.123082
Anp32a	1.56859	0.572809	0.863358	1.04759	1.06054	0.933266	1.13926	1.12828	1.11097	0.999848	1.2304	1.04319	1.20182	0.808452	0.886687	0.823797	0.799624	1.00535	0.97984	1.301	1.07578
Anp32b	0.644571	0.2979	0.464165	0.462501	0.476549	0.489555	0.452528	0.515709	0.503322	0.492619	0.517028	0.580631	0.508423	0.473704	0.553487	0.423818	0.405338	0.457647	0.369539	0.456864	0.374237
Anp32e	0.549405	0.0232537	0.335446	0.424624	0.536404	0.325972	0.416431	0.419245	0.261002	0.346967	0.358717	0.536543	0.32099	0.323915	0.394924	0.415198	0.239039	0.274756	0.3122	0.450328	0.335569
Antxr1	0	0.069711	0.0253138	0.0416546	0.0260387	0.0373745	0.0087911	0.0268064	0.0155273	0.0215327	0.0393273	0.0153447	0.13985	0.0335133	0.0376323	0.0281653	0.0313998	0.0544086	0.0332127	0.021659	0.0205641
Anxa11	0	0.116019	0	0.0208318	0	0.0280337	0.0087911	0.0134044	0.00621114	0.00807528	0.0289815	0.0204589	0.0178562	0.0223445	0.0150559	0.023472	0.01157	0.0302373	0.0103091	0.0144399	0.00771201
Anxa2	0.126424	1.47441	0.063249	0.103979	0.0676567	0.0700362	0.0702718	0.0589471	0.0620719	0.0605283	0.0393273	0.0792011	0.0764561	0.066989	0.0789643	0.0703645	0.0957215	0.0705061	0.0709599	1.25051	0.046256
Anxa3	0	0.116019	0	0.0208318	0.0104165	0.0327045	0.0219763	0.0053619	0.00621114	0.00807528	0.012422	0.00767256	0.0357067	0.221644	0.0363784	0.023472	0.0181808	0.0161283	0.00801824	0.0252681	0.00514137
Anxa5	0.278092	0.320088	0.113679	0.145321	0.211951	0.272323	0.243733	0.306185	0.191376	0.242567	0.297854	0.170528	0.277054	0.473704	0.453549	0.901152	0.34049	0.261135	0.140431	0.583627	0.199194
Anxa6	0.16822	0.512193	0.213563	0.124677	0.114334	0.190436	0.146726	0.231179	0.130068	0.171434	0.150569	0.173048	0.157511	0.232536	0.358636	0.287119	0.30279	0.160599	0.148367	0.260579	0.0847315
Anxa7	0.35847	0.428616	0.275002	0.499768	0.297668	0.330404	0.332311	0.367038	0.188326	0.297091	0.262003	0.188146	0.277054	0.265042	0.320698	0.31406	0.307526	0.270869	0.192396	0.274517	0.229347
Anxa9	0	0	0	0	0.0104165	0	0.015384	0.0107237	0	0.00538355	0.00828148	0.00511507	0.0102039	0.00558656	0.00376411	0	0	0	0.00458189	0	0.00257069
Aoc2	0	0.207804	0	0.0416546	0.0208318	0.0233624	0.015384	0.0053619	0.00931664	0.00672942	0.00414077	0.0127874	0.0153055	0.0223445	0.00627348	0.00938953	0.0165282	0.00403225	0.00801824	0.00722015	0.00771201
Ap1ar	0.16822	0.16208	0.916727	0.642396	0.65948	0.622551	0.717148	0.605709	0.70182	0.634824	0.666015	0.766651	0.57494	0.757771	0.810452	0.84097	0.742961	0.615614	0.634651	0.363765	0.567943
Ap1b1	0.126424	0.275569	0.575327	0.536404	0.726148	0.70618	0.607997	0.769091	0.552244	0.671201	0.502406	0.62798	0.546385	0.618937	0.542614	0.491685	0.484905	0.525834	0.541328	0.333153	0.491535
Ap1g1	0.140384	0.0928896	0.394732	0.572395	0.443637	0.417658	0.404281	0.494361	0.422133	0.362153	0.341169	0.372406	0.32099	0.355587	0.384438	0.423818	0.343612	0.332546	0.348029	0.172429	0.274187
Ap1g2	0.042241	0	0	0	0.0312449	0.0233624	0.0307644	0.0428823	0.0248422	0.0188414	0.0248422	0.0281293	0.00765299	0.016759	0.0363784	0.0281653	0.039659	0.0302373	0.0274879	0.0036101	0.0102826
Ap1m1	0.237206	0.470787	0.3474	0.206855	0.292679	0.339249	0.31352	0.324057	0.236908	0.299667	0.313672	0.255522	0.269678	0.307958	0.290742	0.237206	0.30279	0.198295	0.26161	0.158184	0.241851
Ap1s1	0.930304	0.631584	1.04165	0.851602	1.32848	0.983259	1.22188	1.22196	1.21864	1.13939	1.12686	1.02543	1.0412	1.14252	1.30849	1.02913	1.11275	1.10063	1.01333	1.03797	0.929611
Ap1s2	1.61268	0.449795	0.96811	1.26216	1.41772	0.551114	1.04243	1.04717	0.933108	0.850589	0.700996	0.92587	0.956852	1.16178	0.601679	0.561565	0.726202	1.15959	0.705245	0.605009	0.598572
Ap1s3	0.042241	0	0	0.0208318	0.0416546	0.0280337	0.0329611	0.0241263	0.0279467	0.0390211	0.0269119	0.0127874	0.0331572	0.0335133	0.125144	0.0469311	0.0594691	0.0342675	0.0320678	0.021659	0.0436879
Ap2a1	0.410877	0.491588	0.680441	0.607727	0.620806	0.717269	0.653567	0.685085	0.586849	0.601097	0.502406	0.514133	0.649738	0.637498	0.571835	0.675211	0.547449	0.479408	0.544313	0.644069	0.572349
Ap2a2	1.43097	0.881374	1.42652	1.43428	1.41772	1.42254	1.35151	1.39837	1.36304	1.24269	1.65069	1.64581	1.37907	1.38465	1.58514	1.54777	1.44585	1.4107	1.46142	1.3668	1.34393
Ap2b1	0.939885	0.669729	0.976487	1.14763	1.24289	1.14178	1.10825	1.19253	1.15981	1.1013	1.10604	1.07173	1.01695	0.987775	1.20136	1.09297	1.08298	1.01054	0.966965	1.11511	1.06949
Ap2m1	2.17043	1.46424	1.90301	1.90078	1.99812	1.96315	1.90128	1.89684	2.00424	1.78954	1.87019	1.80788	1.9927	1.9726	1.86007	1.89156	1.82988	1.91056	1.85965	1.95124	1.87387
Ap2s1	1.86207	1.27579	1.66818	1.62377	1.50921	1.62974	1.51132	1.49059	1.69019	1.43941	1.56954	1.60114	1.64439	1.70282	1.48764	1.5246	1.49915	1.53366	1.56529	1.68348	1.60488
Ap3b1	0.042241	0.139086	0.0758765	0.227207	0.140166	0.0886688	0.124949	0.162819	0.105395	0.120836	0.115684	0.0995796	0.106939	0.0558369	0.116424	0.0797277	0.077608	0.0885937	0.082381	0.0541252	0.117978
Ap3b2	0.39787	0.407253	0.531572	0.536404	0.419848	0.614747	0.478261	0.499124	0.500571	0.420845	0.429717	0.436166	0.49032	0.478712	0.497425	0.440968	0.39157	0.385539	0.419437	0.42731	0.400517
Ap3d1	0.512482	0.320088	0.3474	0.607727	0.650959	0.455995	0.542262	0.603453	0.478432	0.523534	0.554928	0.493758	0.537516	0.433246	0.558901	0.524863	0.508394	0.464924	0.440381	0.32288	0.431239
Ap3m1	0.0563083	0.0928896	0.138794	0.227207	0.109158	0.148981	0.142376	0.152226	0.11774	0.138187	0.138275	0.0970344	0.106939	0.105947	0.148761	0.16822	0.122011	0.104648	0.10519	0.0685384	0.0898533
Ap3m2	0.474904	0.139086	0.55357	0.366725	0.549977	0.36125	0.46642	0.489589	0.464484	0.382276	0.527928	0.600148	0.383395	0.562107	0.452413	0.380428	0.326405	0.35348	0.438294	0.190187	0.32094
Ap3s1	0.830691	0.5326	0.835905	0.742399	0.859103	0.728284	0.814574	0.7485	0.885759	0.724872	0.746512	0.659567	0.674679	0.877418	0.963199	0.901152	0.849462	0.742399	0.809973	0.722488	0.703909
Ap3s2	0.042241	0.139086	0.262788	0.287682	0.232281	0.22246	0.241599	0.257208	0.269999	0.246487	0.285943	0.233175	0.252413	0.345067	0.28713	0.237206	0.258276	0.214087	0.231601	0.232555	0.201714
Ap4b1	0.042241	0.0464949	0	0.0208318	0.0728522	0.0186905	0.0373539	0.0482387	0.0279467	0.0349861	0.0207025	0.0255727	0.0229572	0.0279293	0.0313625	0.0187782	0.0363556	0.0302373	0.0217623	0.0108301	0.0231342
Ap4e1	0.014084	0.069711	0.0379656	0.0624594	0.0416546	0.0373745	0.0790386	0.0482387	0.0558715	0.0551537	0.0476011	0.0587897	0.0433538	0.0446779	0.045154	0.0563083	0.0347038	0.0282221	0.0389363	0.0288769	0.0334128
Ap4m1	0.0703645	0.116019	0.151321	0.0832372	0.140166	0.0560454	0.166266	0.123014	0.105395	0.087372	0.113627	0.089395	0.0789994	0.0558369	0.135097	0.107772	0.110519	0.0845766	0.0915103	0.0721396	0.0719174
Ap4s1	0.58566	0.342124	0.942662	0.790169	0.778364	0.731938	0.806415	0.663395	0.854775	0.782935	0.676083	0.644897	0.605226	0.824974	0.739902	0.774632	0.825361	0.701192	0.697037	0.725322	0.672975
Ap5b1	0	0	0	0	0.00520831	0.0140182	0.0087911	0.0053619	0.00931664	0.00672942	0.00621114	0	0.00510202	0	0.0050188	0.00469482	0.00330578	0.00403225	0.00229095	0	0.00257069
Ap5m1	0.0563083	0.0464949	0.101094	0.145321	0.119507	0.172047	0.124949	0.0749967	0.148522	0.127514	0.150569	0.137672	0.0993264	0.150272	0.133853	0.121765	0.12037	0.0845766	0.0915103	0.0721396	0.123082
Ap5s1	0.126424	0.0928896	0.113679	0.124677	0.237349	0.217898	0.281963	0.303624	0.212679	0.243874	0.197472	0.19317	0.175124	0.254236	0.220297	0.186707	0.232607	0.17253	0.193521	0.168871	0.219317
Ap5z1	0.0563083	0.207804	0.0379656	0.0624594	0.0364503	0.065374	0.072464	0.072323	0.0527705	0.0699295	0.0476011	0.0409093	0.0484504	0.0614139	0.0789643	0.0844068	0.07596	0.0584345	0.0480914	0.0324853	0.0436879
Apaf1	0.014084	0.0232537	0.0758765	0.0832372	0.0936132	0.065374	0.0768474	0.0990337	0.077562	0.0699295	0.0724005	0.0664473	0.0433538	0.072562	0.0677023	0.060995	0.0347038	0.0523954	0.0400809	0.0108301	0.0257041
Apba1	0.112439	0.207804	0.429693	0.554481	0.625145	0.378731	0.93024	0.877577	0.317614	0.585144	0.356772	0.370015	0.49032	0.458614	0.486256	0.474904	0.349845	0.385539	0.336132	0.284937	0.293949
Apba2	0.723846	0.139086	0.531572	0.836482	0.52274	0.547067	0.566939	0.541509	0.615646	0.403497	0.781379	0.309608	0.411737	0.407613	0.426132	0.541258	0.613648	0.452175	0.518292	0.667685	0.489245
Apba3	0.0281653	0.230511	0.113679	0.0208318	0.114334	0.111916	0.0746559	0.0749967	0.0961252	0.0994323	0.0620719	0.0587897	0.0484504	0.0837011	0.0727088	0.0797277	0.0561688	0.0544086	0.0732449	0.0649363	0.0821697
Apbb1	1.37881	1.16207	1.1187	0.805767	1.21197	1.02848	1.11737	1.28288	1.11466	1.00768	1.07478	0.992514	1.00383	1.15859	1.09358	1.08729	1.12931	0.981713	1.02867	1.12575	1.00141
Apbb2	0.154316	0.2979	0.382974	0.676397	0.352057	0.559184	0.357191	0.359498	0.393493	0.582854	0.61997	0.509622	0.570574	0.493669	0.471652	0.402213	0.487855	0.349685	0.348029	0.460126	0.428889
Apc	0.278092	0.320088	0.520483	0.836482	0.476549	0.59509	0.482194	0.510983	0.519758	0.496209	0.540573	0.477778	0.409387	0.557294	0.515176	0.581665	0.530182	0.426471	0.443507	0.363765	0.417106
Apc2	0.26451	0.253103	0.55357	0.572395	0.616457	0.661068	0.630015	0.639217	0.613046	0.560961	0.563848	0.54544	0.465183	0.566908	0.642461	0.581665	0.601149	0.502746	0.462178	0.326308	0.400517
Apeh	0.014084	0.230511	0.0758765	0.0624594	0.17104	0.0840133	0.116222	0.168108	0.108483	0.151506	0.0909718	0.104668	0.124677	0.0948299	0.0827162	0.140384	0.102301	0.0926095	0.0903695	0.0613334	0.0975317
Apex1	0.291624	0.069711	0.323445	0.518166	0.32745	0.312639	0.350991	0.359498	0.355799	0.316365	0.442931	0.377182	0.352357	0.334509	0.450139	0.354059	0.435673	0.326813	0.306737	0.257086	0.303789
Apex2	0.0281653	0.0232537	0.0506113	0.0208318	0.0416546	0.0420437	0.0483328	0.0428823	0.049669	0.0296054	0.0351894	0.0511286	0.038256	0.016759	0.0576844	0.0703645	0.0313998	0.0362824	0.0332127	0.0433078	0.0308434
Aph1a	0.16822	0.385713	0.1763	0.206855	0.145321	0.22246	0.215901	0.233789	0.179164	0.170107	0.20356	0.160436	0.170097	0.166823	0.219072	0.163589	0.201931	0.19038	0.158556	0.214947	0.148553
Aph1b	0.0844068	0.0232537	0.101094	0.227207	0.150473	0.167441	0.215901	0.225954	0.145449	0.205812	0.154662	0.132603	0.15247	0.161311	0.122653	0.103104	0.108876	0.102642	0.117712	0.0541252	0.112871
Aph1c	0	0.069711	0.063249	0	0.0312449	0.0233624	0.0329611	0.0268064	0.0279467	0.0363312	0.0207025	0.0281293	0.0280575	0.0390962	0.0188195	0.0469311	0.0231384	0.0201599	0.0332127	0.0108301	0.0205641
Api5	0.250881	0.0928896	0.225921	0.287682	0.252516	0.276825	0.309329	0.298497	0.269999	0.26603	0.266003	0.260472	0.274597	0.281196	0.289539	0.31853	0.248669	0.216057	0.234946	0.243086	0.214294
Apip	0.0984325	0.0928896	0.138794	0.206855	0.119507	0.148981	0.144551	0.197113	0.105395	0.13952	0.160797	0.180602	0.129738	0.144745	0.226417	0.186707	0.159651	0.0785482	0.137028	0.147479	0.133281
Aplf	0	0.0464949	0.0253138	0.0208318	0.0260387	0.0140182	0.0307644	0.0187657	0.0186325	0.0296054	0.0289815	0.0306857	0.0178562	0.011173	0.0112921	0.023472	0.0280955	0.0221756	0.0183266	0.0252681	0.0282739
Apln	0.0281653	0	0.0506113	0	0.0208318	0.00934566	0.0131864	0.0294863	0.0155273	0.0134585	0.0165624	0.01023	0.00765299	0.00558656	0.0138013	0.0187782	0.00826437	0.00604835	0.0137453	0.021659	0.00257069
Aplp1	2.07749	1.41199	1.93931	1.77129	1.99256	1.84903	2.03152	1.98506	1.99516	1.92366	2.11854	2.09595	1.865	2.05042	1.92226	1.811	1.89406	1.90588	1.98798	2.15507	1.88918
Aplp2	1.75418	1.33452	1.84999	1.72194	1.55438	1.98606	1.66223	1.60095	1.6587	1.69633	1.23818	1.18694	1.78151	1.89672	1.4941	1.68239	1.41367	1.49129	1.64829	1.76338	1.83218
Apmap	0.0703645	0.16208	0.213563	0.145321	0.282679	0.254261	0.286187	0.267573	0.20356	0.230786	0.171008	0.233175	0.15247	0.237971	0.198198	0.255429	0.256676	0.170543	0.224903	0.0937255	0.256808
Apoa1	0.0563083	0	0.201172	0.0832372	0.155621	0.125836	0.116222	0.125674	0.123906	0.0980929	0.125961	0.145269	0.0764561	0.155794	0.0777135	0.145031	0.0594691	0.100636	0.192396	0.0360932	0.110316
Apoa2	0	0	0.0506113	0.0624594	0.0676567	0.0373745	0.0768474	0.0910271	0.049669	0.087372	0.0434646	0.0562363	0.0331572	0.0335133	0.107696	0.0750469	0.103945	0.0584345	0.0469472	0.0288769	0.046256
Apobec3	0.014084	0	0	0.0208318	0	0.00934566	0	0	0.00621114	0.00134589	0	0	0.00510202	0.00558656	0.0050188	0.00469482	0.00165289	0	0	0.0036101	0.00514137
Apoc1	0.014084	0.0464949	0	0.0416546	0.0208318	0	0.0131864	0.0134044	0.012422	0.00942113	0.0144922	0.0153447	0.0204067	0.016759	0.017565	0	0.00661152	0.00604835	0.0103091	0.05052	0.0102826
Apoc3	0	0	0	0	0.0312449	0.00934566	0.0175815	0.0616232	0.00621114	0.00672942	0	0	0.00255102	0.0390962	0.0200739	0.0187782	0.00826437	0.0100805	0.00458189	0.0036101	0.00771201
Apod	0.371666	0.385713	0.287176	0.267627	0.211951	0.213331	0.245867	0.218106	0.227837	0.250403	0.27798	0.316919	0.215173	0.259643	0.306352	0.282608	0.243857	0.251376	0.2483	0.530693	0.201714
Apoe	1.7868	2.63088	1.49885	1.81845	1.42957	1.37469	1.4456	1.53121	1.45744	1.38622	1.50313	1.64008	1.50035	1.6103	1.5974	1.48486	1.65792	1.48696	1.44056	1.8997	1.62261
Apoh	0	0	0.0126579	0.0624594	0.00520831	0.0140182	0.0021978	0.0053619	0.00931664	0.00403767	0	0.00511507	0.0102039	0	0.0012547	0.00469482	0.0132228	0.00201613	0.00343642	0	0.00257069
Apol8	0	0.0232537	0.063249	0.0208318	0.0312449	0.00934566	0.0087911	0.0134044	0.012422	0.00942113	0.0144922	0.00511507	0.0153055	0.0279293	0.00752816	0.00469482	0.00826437	0.0120965	0.0114545	0.0036101	0.0231342
Apold1	0.0281653	0	0.0506113	0	0.0208318	0	0.015384	0.0268064	0.0217374	0.01615	0.0186325	0.0255727	0.0306075	0.0223445	0.0225828	0.0187782	0.0247908	0.0181442	0.0229075	0.021659	0.0308434
Apoo	0.16822	0.253103	0.0884921	0.307625	0.181297	0.254261	0.267141	0.28049	0.185274	0.251708	0.22178	0.210713	0.240035	0.17233	0.278687	0.172847	0.242252	0.206197	0.201385	0.305686	0.186576
Apool	0.014084	0	0	0.0416546	0.0104165	0.0233624	0.0219763	0.0348455	0.00931664	0.01615	0.0165624	0.01023	0.0306075	0.016759	0.0213284	0.0187782	0.0165282	0.00604835	0.0125999	0.0144399	0.00257069
Apopt1	0.410877	0.069711	0.649553	0.481212	0.688975	0.555154	0.673249	0.695826	0.679427	0.606761	0.649101	0.667895	0.539737	0.571697	0.668119	0.56963	0.642481	0.579858	0.604055	0.394055	0.463901
App	2.4048	1.48448	2.29491	2.10477	2.13071	2.3342	2.28003	2.59836	2.17857	2.32997	2.04429	2.15495	2.16293	2.27449	2.39919	2.26147	2.03191	2.16191	2.18534	2.21209	2.09534
Appbp2	0.512482	0.16208	0.639133	0.554481	0.527305	0.497867	0.5801	0.560069	0.549557	0.547007	0.540573	0.567509	0.528607	0.571697	0.543704	0.561565	0.508394	0.481212	0.484795	0.274517	0.561316
Appl1	0.57365	0.2979	0.520483	0.590144	0.504382	0.610832	0.633659	0.587584	0.568292	0.556321	0.579801	0.540996	0.60737	0.696496	0.633131	0.516617	0.578721	0.545171	0.53734	0.387352	0.541299
Appl2	0.0984325	0.139086	0.063249	0.165905	0.0832372	0.0933224	0.0549174	0.0535936	0.071368	0.0551537	0.0703354	0.0766513	0.0942482	0.066989	0.0839665	0.0703645	0.0973667	0.0382971	0.0583861	0.143907	0.035982
Aprt	0.487502	0.592607	0.649553	0.676397	0.730226	0.514396	0.722338	0.736014	0.691904	0.69718	0.616511	0.667895	0.515173	0.566908	0.682322	0.613388	0.707957	0.603771	0.573926	0.48605	0.574548
Aptx	0.250881	0.230511	0.262788	0.227207	0.297668	0.258784	0.31352	0.285644	0.299835	0.307384	0.283953	0.265415	0.35955	0.307958	0.327847	0.287119	0.327973	0.257234	0.266037	0.260579	0.286551
Aqp11	0.0844068	0	0.126247	0.0624594	0.103979	0.0933224	0.100927	0.0936966	0.120824	0.0618717	0.0889097	0.102124	0.0840846	0.117051	0.161158	0.103104	0.0907843	0.0986303	0.124535	0.0433078	0.0872927
Aqp4	0	0.139086	0.0126579	0.0624594	0.0416546	0.0420437	0.0285675	0.0375247	0.0217374	0.0201871	0.0310509	0.035798	0.0280575	0.0446779	0.0877168	0.042241	0.0347038	0.0302373	0.0251978	0.0397008	0.0231342
Aqr	0.16822	0.0928896	0.213563	0.247466	0.272651	0.276825	0.273501	0.233789	0.22178	0.21108	0.24395	0.215714	0.227621	0.20526	0.234971	0.26451	0.187332	0.150639	0.183392	0.161749	0.161254
Ar	0.0844068	0.18499	0.798481	0.287682	0.462501	0.468638	0.444553	0.458316	0.546866	0.365937	0.442931	0.696724	0.469774	0.571697	0.348014	0.309585	0.509853	0.985681	0.542323	0.505297	0.49839
Araf	1.7636	1.3572	1.88438	1.97143	1.92635	1.90357	1.96421	1.90935	1.7936	1.96849	1.95169	2.0645	1.96291	1.88186	1.94922	1.9283	1.97679	1.88992	1.91692	1.72792	1.98357
Arap1	0	0.0232537	0	0.0416546	0.0104165	0.00934566	0.0197789	0.0107237	0.00931664	0.00403767	0.00621114	0.00511507	0.00765299	0	0.0163104	0.00938953	0.01157	0.00604835	0.00801824	0.00722015	0.00771201
Arap2	0.112439	0.230511	0.101094	0.0208318	0.0832372	0.0513793	0.0680793	0.0562706	0.0341548	0.0363312	0.0331202	0.0460196	0.0357067	0.072562	0.138826	0.117103	0.166176	0.0745278	0.0377917	0.193732	0.0308434
Arc	0.0703645	0.0928896	0.0506113	0.0832372	0.0572604	0.0560454	0.0768474	0.0402036	0.049669	0.0591848	0.0393273	0.0179019	0.0331572	0.066989	0.0476607	0.00938953	0.0231384	0.0282221	0.0240527	0.0360932	0.0205641
Arcn1	0.35847	0.18499	0.311399	0.424624	0.467193	0.426229	0.428522	0.451039	0.433499	0.417138	0.36842	0.377182	0.335507	0.345067	0.40421	0.34964	0.440191	0.345884	0.337215	0.329733	0.347707
Areg	0	0	0	0	0	0.00934566	0	0.0187657	0.0868473	0.00672942	0	0	0.00255102	0	0	0	0	0	0.0068728	0.0036101	0
Arel1	0.0281653	0.0928896	0.0758765	0.0624594	0.103979	0.135103	0.161929	0.123014	0.11774	0.100771	0.123906	0.0613426	0.0484504	0.072562	0.105201	0.117103	0.100656	0.0584345	0.0926509	0.0541252	0.0949728
Arf1	1.55729	1.05122	1.41497	1.27303	1.48479	1.29655	1.49549	1.60613	1.37195	1.4376	1.43714	1.47075	1.38389	1.3899	1.32605	1.32881	1.35844	1.40418	1.3842	1.4739	1.36508
Arf2	0.0703645	0.0464949	0.213563	0.287682	0.191535	0.22246	0.256518	0.283068	0.200517	0.226851	0.225819	0.243122	0.262288	0.216189	0.204347	0.214318	0.200311	0.176502	0.193521	0.100912	0.173929
Arf3	1.14288	0.669729	1.48257	1.14763	1.53095	1.287	1.57857	1.51447	1.54193	1.40007	1.45102	1.36917	1.17335	1.25959	1.36039	1.40084	1.32856	1.26532	1.24546	1.10222	1.12053
Arf4	0.767477	0.5326	0.670206	0.836482	0.762482	0.683775	0.793267	0.727636	0.779026	0.769647	0.70429	0.879564	0.755216	0.787539	0.78129	0.745812	0.732668	0.773387	0.645991	0.679372	0.645703
Arf4os	0	0	0.0126579	0	0.0208318	0.00467288	0.015384	0.0241263	0.012422	0.00538355	0.00414077	0.0255727	0.00255102	0.00558656	0.0112921	0.014084	0.00330578	0.00806443	0.0103091	0	0.00771201
Arf5	1.62343	1.44364	1.55657	1.59978	1.29447	1.57363	1.41577	1.37057	1.48052	1.37155	1.35205	1.34696	1.60373	1.6231	1.49141	1.47469	1.41215	1.4553	1.46846	1.69123	1.51704
Arf6	0.291624	0.116019	0.299308	0.405465	0.282679	0.299252	0.330229	0.396996	0.410715	0.352037	0.257998	0.309608	0.354757	0.376516	0.368046	0.300616	0.332673	0.278638	0.283694	0.250092	0.269229
Arfgap1	0.195927	0.230511	0.475544	0.590144	0.462501	0.374371	0.434546	0.392026	0.393493	0.379769	0.378091	0.422133	0.373881	0.371298	0.389103	0.340783	0.34049	0.368612	0.301264	0.260579	0.34043
Arfgap2	0.223487	0.16208	0.335446	0.287682	0.297668	0.321534	0.32606	0.37956	0.361631	0.340616	0.341169	0.292487	0.354757	0.334509	0.285925	0.31853	0.31068	0.272813	0.310016	0.33657	0.293949
Arfgap3	0.140384	0.0464949	0.113679	0.124677	0.140166	0.0793559	0.1053	0.130992	0.105395	0.0954137	0.113627	0.122456	0.106939	0.0781328	0.145037	0.107772	0.0874916	0.114668	0.0835226	0.0721396	0.102647
Arfgef1	0.384799	0.428616	0.188751	0.424624	0.30265	0.396103	0.390035	0.339297	0.349956	0.391035	0.303794	0.28758	0.32099	0.291925	0.302756	0.34964	0.362272	0.292195	0.339381	0.239579	0.261781
Arfgef2	0.0563083	0.0232537	0.126247	0.186418	0.186418	0.185844	0.209454	0.259802	0.11774	0.204494	0.121851	0.102124	0.220156	0.183329	0.168585	0.163589	0.15312	0.154625	0.112022	0.0541252	0.148553
Arfgef3	0.250881	0.2979	0.73069	0.742399	0.956639	0.887967	0.91667	1.05885	0.774311	0.96	0.824634	0.803344	0.820577	0.889252	0.820664	0.774632	0.728791	0.742399	0.789414	0.753393	0.888626
Arfip1	0.0844068	0.069711	0.0758765	0.0416546	0.165905	0.0840133	0.0877992	0.120353	0.160797	0.107465	0.0847845	0.0842991	0.119613	0.0892669	0.110191	0.140384	0.0957215	0.0745278	0.0755295	0.05052	0.0847315
Arfip2	0.345215	0.207804	0.382974	0.347152	0.361844	0.348069	0.353059	0.356981	0.352879	0.341887	0.348981	0.38433	0.352357	0.360834	0.356279	0.331901	0.30279	0.272813	0.333964	0.277994	0.306245
Arfrp1	0.436692	0.5326	0.45273	0.65948	0.429391	0.455995	0.468398	0.470395	0.495057	0.428244	0.414527	0.405662	0.485771	0.453562	0.491848	0.445237	0.423583	0.439357	0.421539	0.353596	0.417106
Arglu1	1.63407	2.44483	1.67736	1.79176	1.71652	1.58655	1.63533	1.86731	1.74841	1.74304	1.73893	1.68411	1.49055	1.66472	1.75508	1.67562	1.70896	1.71329	1.66265	1.71037	1.73033
Arhgap1	0.126424	0.069711	0.213563	0.124677	0.292679	0.195023	0.317705	0.288218	0.233887	0.234716	0.269999	0.2257	0.124677	0.183329	0.302756	0.158954	0.205169	0.166567	0.161949	0.13318	0.135829
Arhgap10	0.014084	0.0464949	0.0506113	0	0.0260387	0.0186905	0.0241735	0.0348455	0.00931664	0.0296054	0.012422	0.0127874	0.0102039	0.00558656	0.0100375	0.0469311	0.0264432	0.0161283	0.0194719	0.0829374	0.00514137
Arhgap12	0.140384	0.139086	0.188751	0.267627	0.232281	0.213331	0.265019	0.298497	0.281963	0.279004	0.279972	0.22071	0.38102	0.216189	0.231307	0.223487	0.240646	0.225896	0.246077	0.168871	0.214294
Arhgap15	0	0	0.213563	0	0.00520831	0.0233624	0.00439559	0.00268096	0.0155273	0.010767	0.119796	0.0255727	0.00255102	0.016759	0.00752816	0.00938953	0.00165289	0.0181442	0.0835226	0.0108301	0.0513913
Arhgap17	0.0703645	0.275569	0.0758765	0.0624594	0.0572604	0.102624	0.0856097	0.136307	0.120824	0.0793246	0.0847845	0.0970344	0.056093	0.0558369	0.0914659	0.060995	0.0693658	0.0725171	0.0583861	0.0685384	0.0770446
Arhgap18	0.042241	0.069711	0.101094	0.0416546	0.0520598	0.0513793	0.0527228	0.0696488	0.0620719	0.0591848	0.0806579	0.0689989	0.0535458	0.0837011	0.0626942	0.0516203	0.102301	0.0443403	0.0343575	0.0108301	0.0385509
Arhgap19	0	0	0.0253138	0	0.0312449	0.00467288	0.0021978	0.0107237	0.00931664	0.00672942	0.00828148	0.0179019	0.00255102	0	0.0125467	0	0.00826437	0.00806443	0.00458189	0.0108301	0.00257069
Arhgap20	0.182091	0.139086	0.807926	0.590144	0.508987	0.543012	0.336472	0.54849	0.64655	0.335526	0.579801	0.534313	0.378642	0.600184	0.940436	0.767477	0.57731	0.688301	0.555223	0.326308	0.525593
Arhgap21	0.182091	0.230511	0.238246	0.206855	0.25756	0.272323	0.250131	0.267573	0.236908	0.189972	0.201532	0.218213	0.240035	0.20526	0.236192	0.205131	0.201931	0.186418	0.168729	0.291867	0.194151
Arhgap22	0.014084	0.253103	0.063249	0.0416546	0.0260387	0.0373745	0.0351576	0.0134044	0.0248422	0.033641	0.0434646	0.00511507	0.038256	0.072562	0.0439006	0.060995	0.0347038	0.0362824	0.028633	0.0288769	0.0385509
Arhgap23	0.042241	0.069711	0.299308	0.206855	0.176171	0.208761	0.228769	0.228568	0.209641	0.189972	0.183238	0.152857	0.207687	0.221644	0.192042	0.200531	0.149852	0.17253	0.141566	0.136757	0.148553
Arhgap24	0.014084	0.0232537	0.311399	1.14763	0.25756	0.317089	0.678579	0.700103	0.314658	0.563277	0.350931	0.265415	0.328257	0.254236	0.163635	0.300616	0.161283	0.247466	0.258287	0.0865346	0.138375
Arhgap26	0.0844068	0.069711	0.238246	0.386164	0.25756	0.208761	0.31352	0.331686	0.299835	0.352037	0.285943	0.203202	0.27951	0.323915	0.405369	0.371666	0.218101	0.243553	0.295783	0.140333	0.259295
Arhgap27	0.209727	0.0464949	0.138794	0.0624594	0.272651	0.195023	0.19869	0.27791	0.130068	0.179386	0.148522	0.112296	0.129738	0.17233	0.0852168	0.232638	0.084198	0.0745278	0.147234	0.0865346	0.161254
Arhgap27os1	0	0	0	0	0	0.00467288	0.0087911	0.0134044	0.0217374	0.00403767	0.00207039	0.00511507	0.0204067	0.0223445	0.00752816	0.00469482	0.00991719	0.00403225	0.0068728	0.0036101	0.00771201
Arhgap27os2	0.140384	0.0928896	0.287176	0.145321	0.211951	0.240661	0.205151	0.189217	0.387728	0.247793	0.148522	0.190659	0.259822	0.297278	0.179709	0.182091	0.169436	0.19236	0.251632	0.129601	0.23185
Arhgap29	0.014084	0.0232537	0.0506113	0	0	0	0.015384	0.0053619	0.0155273	0.010767	0.00207039	0.00767256	0.00510202	0.011173	0.0138013	0.0187782	0.00495866	0.00201613	0.0125999	0	0.00771201
Arhgap31	0.014084	0.0928896	0.0379656	0.0416546	0.0104165	0.0420437	0.0109888	0.0294863	0.00931664	0.0269147	0.0227724	0.01023	0.0331572	0.0390962	0.0313625	0.023472	0.0660676	0.0342675	0.029778	0.0757398	0.0488238
Arhgap32	0.154316	0.16208	0.311399	0.536404	0.405465	0.610832	0.530769	0.515709	0.404987	0.460047	0.416431	0.324213	0.328257	0.433246	0.350378	0.457998	0.34673	0.247466	0.353421	0.274517	0.39099
Arhgap33	0.0703645	0.0928896	0.151321	0.247466	0.201753	0.139732	0.207303	0.183947	0.197472	0.193937	0.211666	0.213215	0.170097	0.161311	0.244727	0.200531	0.222942	0.164579	0.125671	0.0577297	0.117978
Arhgap35	0.154316	0	0.382974	0.481212	0.518166	0.417658	0.505648	0.557759	0.407853	0.424547	0.393493	0.470894	0.345147	0.433246	0.49408	0.533077	0.48638	0.324899	0.357728	0.32288	0.328263
Arhgap36	0.042241	0	0.225921	0	0.0987975	0.0420437	0.245867	0.503875	0.071368	0.499793	0.0930334	0.307167	0.0255074	0.0948299	0.116424	0.117103	0.704021	0.0523954	0.150632	0.0793391	0.0488238
Arhgap39	0.112439	0.16208	0.201172	0.247466	0.277668	0.258784	0.319796	0.303624	0.236908	0.284181	0.231871	0.240638	0.154991	0.177832	0.291946	0.296123	0.294881	0.202247	0.228253	0.18664	0.194151
Arhgap4	0	0	0	0.0208318	0.0312449	0.00467288	0.00439559	0.0107237	0.0279467	0.010767	0.00828148	0.01023	0.0204067	0.011173	0.017565	0.014084	0.00826437	0.0120965	0.0114545	0.00722015	0.00771201
Arhgap42	0	0	0.0379656	0	0.00520831	0.0233624	0.0351576	0.0160851	0.012422	0.0403659	0.0165624	0.0434646	0.0102039	0.0223445	0.0163104	0.00938953	0.0280955	0.0161283	0.0137453	0.0288769	0.0179939
Arhgap44	0.35847	0.342124	0.575327	0.774409	0.590144	0.887967	0.561272	0.566985	0.638874	0.598826	0.500571	0.496031	0.579296	0.714241	0.564301	0.504187	0.665483	0.497382	0.558188	0.367147	0.561316
Arhgap5	0.512482	0.275569	0.680441	0.821204	0.75448	0.634194	0.561272	0.543839	0.656733	0.53178	0.59912	0.58281	0.559616	0.683061	0.726189	0.675211	0.594169	0.560856	0.606945	0.453599	0.527844
Arhgap6	0.014084	0.0232537	0.201172	0.0208318	0.462501	0.125836	0.566939	0.399478	0.358717	0.184682	0.164883	0.127531	0.0255074	0.0223445	0.0939646	0.0844068	0.48638	0.0885937	0.0858053	0.0829374	0.10776
Arhgdia	0.910938	0.779191	1.16275	0.896029	1.26489	0.992429	1.38617	1.33154	1.27471	1.14951	1.15922	1.34321	0.877761	0.976767	1.23816	1.26185	1.16835	1.12928	1.18615	1.08919	1.05998
Arhgdib	0	0	0	0.0208318	0	0.0233624	0.0131864	0.0214461	0.00931664	0.0121128	0.0269119	0.0127874	0.00765299	0.155794	0.0238371	0.014084	0.151486	0.0785482	0.0229075	0.0036101	0.0102826
Arhgdig	1.31007	1.34591	1.86158	1.70007	2.37292	1.8214	2.11529	1.97489	2.23726	2.0639	2.08208	1.88352	1.75871	1.82724	2.27637	1.76828	2.10865	2.06796	2.0542	1.65591	1.90127
Arhgef1	0.0984325	0.5326	0.151321	0.103979	0.237349	0.236118	0.25439	0.293361	0.191376	0.178062	0.209641	0.157911	0.129738	0.161311	0.189578	0.191319	0.180831	0.182454	0.217077	0.158184	0.161254
Arhgef10	0.0281653	0	0.0253138	0.0208318	0.0416546	0.0373745	0.0307644	0.032166	0.012422	0.0322959	0.0269119	0.0306857	0.0331572	0.0335133	0.0539262	0.042241	0.0380074	0.0322525	0.028633	0.115268	0.0308434
Arhgef10l	0.250881	0.0232537	0.0884921	0.0624594	0.109158	0.0840133	0.12931	0.130992	0.136224	0.151506	0.0538043	0.0613426	0.142376	0.150272	0.0814657	0.107772	0.115446	0.0725171	0.101772	0.129601	0.10776
Arhgef11	0.0844068	0.116019	0.101094	0.227207	0.211951	0.204186	0.224483	0.264985	0.166926	0.187328	0.146474	0.175567	0.15247	0.194306	0.241071	0.158954	0.208405	0.108657	0.126808	0.111681	0.135829
Arhgef12	0.500028	0.612199	0.607506	0.625145	0.616457	0.630322	0.581972	0.733924	0.628587	0.583999	0.581565	0.58281	0.512925	0.483709	0.522895	0.621235	0.498148	0.424624	0.551263	0.353596	0.576744
Arhgef15	0.154316	0.16208	0.418092	0.481212	0.400653	0.481212	0.501757	0.601194	0.461684	0.493816	0.273992	0.228193	0.390509	0.360834	0.382102	0.340783	0.403812	0.466739	0.407843	0.207886	0.433587
Arhgef16	0	0	0.0126579	0.0208318	0.00520831	0.0327045	0.0109888	0.0134044	0.012422	0.00942113	0.00207039	0.00255754	0.0637324	0.0390962	0.0112921	0.00469482	0.0148755	0.0241912	0.00229095	0.0036101	0.0102826
Arhgef17	0.16822	0.116019	0.3474	0.676397	0.554481	0.451765	0.480229	0.601194	0.568292	0.472165	0.425928	0.396202	0.46748	0.488694	0.504099	0.491685	0.455191	0.450348	0.400438	0.229039	0.352549
Arhgef18	0.0703645	0.0232537	0.126247	0.165905	0.140166	0.204186	0.164098	0.157525	0.163862	0.158155	0.160797	0.190659	0.147425	0.128141	0.117671	0.089084	0.0973667	0.104648	0.0983522	0.0721396	0.138375
Arhgef19	0	0.0464949	0.0126579	0.0208318	0.0156244	0.0233624	0.015384	0.0134044	0.00310559	0.00538355	0.0144922	0.0153447	0.00765299	0.00558656	0.0100375	0.00938953	0.00991719	0.00806443	0.0103091	0.0180496	0.0102826
Arhgef2	0.0563083	0.16208	0.126247	0.0832372	0.135006	0.0700362	0.146726	0.144271	0.114655	0.10211	0.134173	0.117377	0.119613	0.117051	0.212942	0.13108	0.151486	0.0946168	0.0937914	0.312575	0.128183
Arhgef25	0.549405	0.275569	0.394732	0.267627	0.337317	0.370004	0.365438	0.387047	0.404987	0.311236	0.317614	0.262944	0.352357	0.407613	0.482895	0.384799	0.496681	0.340175	0.304549	0.229039	0.289019
Arhgef26	0	0	0.101094	0.0208318	0.0156244	0.0186905	0.0285675	0.0294863	0.0403617	0.0242237	0.0393273	0.0792011	0.0178562	0.0335133	0.0225828	0.0187782	0.0231384	0.0322525	0.0377917	0.0469142	0.0205641
Arhgef28	0.0563083	0.0464949	0.138794	0.0832372	0.0676567	0.0607104	0.135846	0.204996	0.11774	0.104788	0.146474	0.107211	0.0509983	0.0837011	0.180943	0.0797277	0.167806	0.198295	0.148367	0.0685384	0.0513913
Arhgef3	0.0281653	0.16208	0.063249	0.103979	0.0468579	0.0886688	0.0417461	0.0642988	0.058972	0.0470889	0.0455329	0.0536827	0.0357067	0.0781328	0.0539262	0.107772	0.0693658	0.0403117	0.045803	0.0108301	0.0770446
Arhgef33	0	0.0232537	0.0126579	0	0.0156244	0.00934566	0.0219763	0.0268064	0.00931664	0.010767	0.0207025	0.0179019	0.00510202	0.0279293	0.0188195	0.023472	0.0231384	0.0100805	0.0194719	0.0036101	0.0231342
Arhgef38	0	0.0464949	0	0	0	0	0	0.00268096	0	0	0	0	0.0331572	0	0.0050188	0	0.0148755	0.0120965	0	0	0
Arhgef4	0.35847	0.275569	1.00947	0.910532	0.71796	0.713581	0.793267	0.840998	0.861471	0.722759	0.978871	0.846592	0.615924	0.783321	0.747686	0.767477	0.794671	0.603771	0.763319	0.568206	0.714094
Arhgef40	0.209727	0.207804	0.213563	0.165905	0.272651	0.190436	0.319796	0.303624	0.227837	0.152836	0.247969	0.277745	0.207687	0.155794	0.368046	0.177471	0.360721	0.202247	0.160818	0.218474	0.153637
Arhgef6	0.014084	0.18499	0.0253138	0.0208318	0.0156244	0.0746969	0.0834197	0.0749967	0.049669	0.0457445	0.0144922	0.0204589	0.0484504	0.0335133	0.0276	0.0328579	0.0363556	0.0322525	0.0320678	0.0108301	0.0488238
Arhgef7	0.436692	0.407253	0.323445	0.307625	0.471876	0.370004	0.400219	0.374558	0.261002	0.349503	0.339213	0.314484	0.195187	0.302622	0.345648	0.31406	0.28219	0.268924	0.291391	0.190187	0.221827
Arhgef9	0.549405	0.18499	0.845114	0.774409	0.7056	0.897799	0.511472	0.510983	0.820822	0.602231	0.781379	0.684429	0.886775	0.931807	0.848163	0.778197	0.709267	0.787131	0.716125	0.42731	0.647816
Arid1a	0.462236	0.0928896	0.441239	0.709731	0.903299	0.579215	0.912116	0.877577	0.738478	0.740636	0.707577	0.600148	0.705347	0.774851	0.704401	0.537171	0.647921	0.598673	0.520305	0.424004	0.493822
Arid1b	0.305103	0.116019	0.3474	0.405465	0.361844	0.249733	0.430532	0.349415	0.335297	0.348235	0.358717	0.265415	0.33792	0.371298	0.293148	0.186707	0.286955	0.255283	0.269354	0.250092	0.189102
Arid2	0.140384	0.116019	0.262788	0.186418	0.227207	0.325972	0.29462	0.290791	0.236908	0.286767	0.2238	0.270352	0.259822	0.216189	0.271435	0.305103	0.264668	0.212115	0.240515	0.143907	0.239353
Arid3a	0.0563083	0.0464949	0.0126579	0.0208318	0.0468579	0.0327045	0.0658864	0.0589471	0.0372585	0.0403659	0.0331202	0.0409093	0.0331572	0.016759	0.0564318	0.0375499	0.042962	0.0564217	0.0343575	0.0288769	0.0334128
Arid3b	0.0703645	0.2979	0.0253138	0.103979	0.0312449	0.00934566	0.0263706	0.032166	0.0434646	0.0296054	0.0351894	0.035798	0.0357067	0.0446779	0.0501672	0.023472	0.0280955	0.0221756	0.0263429	0.0324853	0.0128531
Arid4a	0.881374	0.207804	0.680441	0.709731	0.885052	0.668671	0.978871	0.890821	0.962409	0.783952	0.907481	0.857667	0.682912	0.709823	0.943832	0.809913	0.943101	0.919346	0.790276	0.617117	0.791377
Arid4b	0.384799	0.253103	0.639133	0.774409	0.684793	0.713581	0.729232	0.68939	0.679427	0.677733	0.682763	0.776393	0.635023	0.683061	0.740877	0.799415	0.732668	0.693147	0.597294	0.424004	0.679208
Arid5a	0.0281653	0.139086	0.0253138	0	0.0208318	0.00467288	0.0109888	0.0160851	0.00621114	0.0148043	0.0331202	0.0204589	0.00510202	0.011173	0.0250915	0.0328579	0.0165282	0.00806443	0.00916367	0.0144399	0.0154236
Arid5b	0.182091	0.230511	0.225921	0.32745	0.227207	0.263302	0.277734	0.346888	0.233887	0.260828	0.239927	0.223206	0.349956	0.2434	0.435306	0.428116	0.307526	0.326813	0.3122	0.302237	0.376636
Arih1	0.16822	0.18499	0.3474	0.386164	0.307625	0.396103	0.311425	0.387047	0.364543	0.345698	0.362602	0.262944	0.281963	0.407613	0.342096	0.402213	0.351401	0.3057	0.280389	0.267555	0.261781
Arih2	0.0563083	0.16208	0.213563	0.247466	0.237349	0.249733	0.265019	0.244214	0.261002	0.204494	0.227837	0.200696	0.222646	0.177832	0.23375	0.223487	0.206788	0.158608	0.181138	0.122438	0.158716
Arl1	0.788843	0.5326	0.564478	0.554481	0.750463	0.695015	0.715414	0.632565	0.599994	0.690723	0.710858	0.659567	0.727481	0.637498	0.696406	0.533077	0.616414	0.624026	0.64033	0.693869	0.691604
Arl10	0.014084	0	0.0253138	0.103979	0.0520598	0.0560454	0.0417461	0.0482387	0.0558715	0.0659011	0.0662042	0.0409093	0.0484504	0.0335133	0.0476607	0.0516203	0.0627687	0.0483682	0.0412254	0.0469142	0.035982
Arl13b	0.0703645	0.0464949	0.113679	0.0832372	0.103979	0.0746969	0.103114	0.0830145	0.099216	0.076641	0.0847845	0.0715502	0.066278	0.0502582	0.0839665	0.0984325	0.0973667	0.0624594	0.0789557	0.0649363	0.0744812
Arl14ep	0.250881	0.116019	0.287176	0.307625	0.247466	0.236118	0.286187	0.293361	0.261002	0.24126	0.299835	0.240638	0.267217	0.345067	0.416925	0.309585	0.352956	0.278638	0.241628	0.22552	0.209266
Arl15	0.014084	0.0464949	0.0253138	0.0416546	0.0624594	0.0840133	0.0505279	0.0482387	0.0403617	0.0470889	0.0765298	0.0766513	0.0611863	0.0614139	0.0664505	0.0375499	0.112161	0.0463544	0.0389363	0.0469142	0.0539584
Arl16	0.16822	0.230511	0.750361	0.642396	0.633791	0.447528	0.63911	0.564682	0.626006	0.586288	0.590363	0.509622	0.423455	0.552469	0.631051	0.629047	0.682868	0.59356	0.538338	0.298784	0.419467
Arl2	1.42458	1.12165	1.23277	1.57525	1.2838	1.43945	1.17819	1.35512	1.24536	1.29391	1.29861	1.35565	1.36814	1.3028	1.23413	1.32181	1.29368	1.29549	1.36624	1.34411	1.37977
Arl2bp	1.06724	0.631584	0.951198	0.758486	1.2838	1.11992	1.12256	1.21174	1.12016	1.17254	1.25686	1.16241	1.18053	1.02382	1.10112	1.00814	1.07391	0.949533	0.995575	1.01967	0.94879
Arl3	1.43097	1.00701	1.49885	1.17143	1.45752	1.44572	1.51224	1.62662	1.51621	1.48789	1.47917	1.50807	1.37907	1.43863	1.47735	1.55539	1.57324	1.41625	1.55097	1.33348	1.48538
Arl4a	0.0703645	0.0232537	0.299308	0.227207	0.332387	0.317089	0.394113	0.467984	0.281963	0.281593	0.429717	0.400936	0.177636	0.194306	0.293148	0.255429	0.307526	0.204223	0.275979	0.521206	0.226841
Arl4c	0.0703645	0.275569	0.542601	0.554481	0.825038	0.591134	0.613526	0.687239	0.67692	0.728037	0.649101	0.692636	0.668477	0.723042	0.729137	0.675211	0.838666	0.63407	0.548287	0.916664	0.598572
Arl4d	0.0703645	0.0928896	0.0379656	0.0416546	0.0260387	0.0327045	0.015384	0.00804281	0.00621114	0.010767	0.0186325	0.0179019	0.0127548	0.0279293	0.0150559	0.023472	0.00495866	0.00604835	0.00114548	0.12602	0.0257041
Arl5a	0.0844068	0.0464949	0.335446	0.347152	0.429391	0.383085	0.390035	0.487199	0.439163	0.322765	0.348981	0.329067	0.303971	0.297278	0.364521	0.345215	0.338928	0.278638	0.371681	0.193732	0.284081
Arl5b	0.0703645	0.069711	0.0758765	0.145321	0.17104	0.204186	0.146726	0.117691	0.160797	0.130184	0.105395	0.0715502	0.134796	0.183329	0.143795	0.186707	0.135126	0.0705061	0.106329	0.0937255	0.112871
Arl5c	0	0	0.0126579	0	0.00520831	0	0.00439559	0.00804281	0.012422	0.0121128	0.00828148	0.00255754	0.0127548	0.011173	0.0150559	0.00469482	0.00495866	0.00806443	0.00916367	0.0036101	0
Arl6	0.331901	0.16208	0.3474	0.307625	0.476549	0.36125	0.570709	0.382058	0.326468	0.417138	0.515205	0.338752	0.488046	0.402455	0.530586	0.553467	0.534512	0.394898	0.383433	0.32288	0.405267
Arl6ip1	2.10491	1.36837	1.94995	1.83803	2.00778	1.81697	1.96542	1.94075	2.06025	1.96183	1.9643	1.94407	2.12459	1.91461	1.84972	1.84339	1.82106	1.8923	1.95925	1.90497	2.00827
Arl6ip4	0.745812	0.631584	1.02566	1.13556	1.06054	0.980189	1.05615	0.953409	1.1311	1.00854	1.06078	0.920605	0.884977	0.973077	1.00273	0.977545	0.917145	0.979061	1.003	0.89913	0.94879
Arl6ip5	0.939885	0.669729	0.680441	0.821204	0.939089	0.72462	0.849948	0.783344	0.854775	0.755209	0.764043	0.789928	0.906403	0.92033	0.882261	0.771059	0.746803	0.945456	0.772938	0.972744	0.75222
Arl6ip6	0.126424	0.116019	0.0884921	0.206855	0.17104	0.097974	0.168433	0.178672	0.151593	0.127514	0.171008	0.205707	0.162549	0.139215	0.196967	0.172847	0.164546	0.144656	0.126808	0.175985	0.123082
Arl8a	0.901152	0.669729	1.08844	1.33619	1.22331	1.06066	1.03691	1.19253	1.08299	1.05785	1.08362	1.01237	1.09145	1.17445	1.3273	1.17242	1.26118	1.08483	0.980594	1.14259	0.977903
Arl8b	0.436692	0.18499	1.05744	1.12336	0.973962	0.868095	0.856288	1.01666	0.989057	0.871825	0.866658	0.875938	0.799738	0.84537	1.00597	1.05563	0.970761	0.896969	0.864261	0.805374	0.810586
Armc1	0.881374	0.2979	0.845114	0.924885	0.71796	0.864756	0.710202	0.682928	0.743303	0.701471	0.71903	0.692636	0.755216	0.727425	0.770807	0.716456	0.731377	0.637405	0.720637	0.764484	0.720174
Armc10	0.0703645	0.0464949	0.063249	0.0832372	0.0987975	0.0793559	0.10967	0.0963655	0.102306	0.0940738	0.113627	0.091942	0.0433538	0.128141	0.107696	0.0984325	0.0743118	0.0946168	0.084664	0.0469142	0.046256
Armc2	0.0844068	0.0464949	0	0.0624594	0.124677	0.0746969	0.118404	0.141617	0.0930334	0.083349	0.0662042	0.0536827	0.0739123	0.0837011	0.166111	0.0703645	0.0627687	0.118673	0.0503796	0.0288769	0.0334128
Armc5	0.0563083	0.139086	0.0379656	0.0416546	0.0624594	0.0513793	0.0571118	0.0535936	0.0434646	0.0390211	0.0558715	0.033242	0.071368	0.0335133	0.0476607	0.0281653	0.0479155	0.0423261	0.0320678	0.0793391	0.0488238
Armc6	0.0984325	0.0464949	0.126247	0.0624594	0.160765	0.204186	0.161929	0.197113	0.148522	0.148844	0.16284	0.203202	0.185165	0.275819	0.180943	0.158954	0.179205	0.136671	0.108607	0.161749	0.10776
Armc7	0.014084	0	0.0253138	0.0208318	0.0572604	0.0373745	0.0505279	0.0455606	0.046567	0.0269147	0.0434646	0.074101	0.0459022	0.016759	0.045154	0.060995	0.0413106	0.0282221	0.0355023	0.0144399	0.0334128
Armc8	0.26451	0.2979	0.382974	0.307625	0.471876	0.409057	0.444553	0.396996	0.444813	0.381023	0.366482	0.341169	0.347552	0.329216	0.46488	0.406548	0.400756	0.340175	0.32745	0.232555	0.291485
Armc9	0.0563083	0.069711	0.101094	0.0416546	0.32745	0.185844	0.340627	0.313857	0.212679	0.207129	0.227837	0.230685	0.122145	0.161311	0.210487	0.172847	0.166176	0.144656	0.175501	0.0973192	0.171396
Armcx1	0.384799	0.2979	0.475544	0.554481	0.462501	0.543012	0.426511	0.532165	0.552244	0.48061	0.518848	0.353223	0.548596	0.609584	0.546971	0.545336	0.637025	0.468553	0.443507	0.370525	0.530093
Armcx2	0.31853	0.116019	0.299308	0.347152	0.252516	0.290298	0.260771	0.306185	0.29091	0.239952	0.393493	0.348407	0.378642	0.443426	0.372739	0.296123	0.34049	0.313393	0.242741	0.179539	0.249336
Armcx3	0.487502	0.2979	0.359307	0.518166	0.361844	0.378731	0.348921	0.396996	0.390612	0.346967	0.480286	0.314484	0.38814	0.254236	0.406527	0.371666	0.498148	0.309549	0.26161	0.32288	0.39099
Armcx4	0.16822	0.0232537	0.225921	0.32745	0.307625	0.213331	0.271382	0.252016	0.248973	0.217658	0.235901	0.170528	0.192683	0.199786	0.204347	0.218905	0.185708	0.210143	0.215958	0.0973192	0.186576
Armcx5	0.182091	0.0928896	0.238246	0.247466	0.332387	0.208761	0.290406	0.220724	0.230863	0.207129	0.247969	0.165484	0.217665	0.270435	0.267804	0.232638	0.21164	0.202247	0.205874	0.168871	0.204233
Armcx6	0.0281653	0.0464949	0.275002	0.0624594	0.150473	0.065374	0.0877992	0.128334	0.114655	0.0806662	0.249976	0.122456	0.0815423	0.111501	0.120162	0.0937593	0.221329	0.118673	0.0835226	0.0541252	0.0796074
Armt1	0.154316	0.139086	0.0884921	0.145321	0.140166	0.125836	0.116222	0.130992	0.120824	0.114153	0.099216	0.091942	0.112011	0.199786	0.121408	0.145031	0.0693658	0.0966238	0.107468	0.0577297	0.115425
Arnt	0.0844068	0.16208	0.126247	0.145321	0.124677	0.190436	0.155418	0.117691	0.120824	0.122172	0.11774	0.114837	0.122145	0.150272	0.140069	0.0984325	0.131849	0.0926095	0.0800976	0.0757398	0.0796074
Arnt2	0.154316	0.139086	0.406439	0.726148	0.342238	0.39177	0.404281	0.308744	0.358717	0.269927	0.435389	0.343584	0.190178	0.265042	0.507428	0.445237	0.531627	0.387413	0.446629	0.129601	0.291485
Arntl	0.112439	0.069711	0.0884921	0.124677	0.103979	0.125836	0.138023	0.138963	0.11157	0.151506	0.0682699	0.0536827	0.144901	0.17233	0.146278	0.140384	0.0693658	0.0785482	0.0858053	0.108093	0.0770446
Arntl2	0	0	0.0126579	0.0624594	0.0416546	0.0186905	0.0263706	0.0455606	0.0248422	0.0457445	0.0227724	0.0230159	0.0178562	0.011173	0.0150559	0.042241	0.021486	0.0141124	0.0355023	0.0036101	0.0179939
Arpc1a	1.05854	0.491588	1.0013	0.96706	0.9774	1.06643	0.977423	0.892702	1.01915	1.00246	0.970665	0.9346	1.1037	1.01311	1.05287	0.958847	0.989248	1.11384	1.02794	1.31012	1.01959
Arpc1b	0.042241	0.116019	0.0253138	0.0832372	0.0208318	0.0513793	0.0614997	0.0294863	0.0651712	0.0376761	0.041396	0.0409093	0.0586399	0.0502582	0.0464074	0.042241	0.0462645	0.0282221	0.0332127	0.0649363	0.035982
Arpc2	1.10143	0.669729	1.08844	1.07336	1.03122	0.942782	1.07912	1.0115	1.05243	0.97963	0.962409	0.866832	1.02509	0.991424	1.11828	1.04098	1.02231	1.14802	0.953964	1.15507	0.962569
Arpc3	0.679003	0.512193	0.649553	0.805767	0.70146	0.750087	0.830759	0.811455	0.861471	0.889913	0.812402	0.690588	0.80545	0.820861	0.870687	0.830691	0.871992	0.803763	0.754521	0.929054	0.748249
Arpc4	0.690328	0.5326	0.807926	0.65948	1.0113	0.82063	0.889123	0.981894	0.945743	0.811166	0.850293	0.955327	0.778606	0.904878	1.0707	0.917424	0.989248	0.931776	0.791999	0.926585	0.732267
Arpc5	0.930304	0.552806	0.817311	0.499768	0.949646	0.563207	1.03275	0.978366	0.913933	0.829038	0.956877	0.844738	0.649738	0.783321	1.54339	1.00814	1.03801	0.881374	0.777291	0.824084	0.724215
Arpc5l	1.42458	1.12165	1.55657	1.5331	1.58963	1.57177	1.57683	1.62256	1.52657	1.56603	1.56954	1.58114	1.57069	1.63366	1.79356	1.70576	1.6754	1.62835	1.59739	1.53799	1.57468
Arpin	0.0703645	0	0.0884921	0.103979	0.0520598	0.0700362	0.072464	0.112364	0.0620719	0.0913936	0.0600054	0.0409093	0.0942482	0.0558369	0.048914	0.0281653	0.0462645	0.0362824	0.0435143	0.0613334	0.0539584
Arpp19	1.26676	1.02191	1.53071	1.18315	1.46897	1.18696	1.39544	1.38203	1.44918	1.27662	1.40884	1.39693	1.20322	1.30844	1.4397	1.52264	1.39761	1.44454	1.35743	1.28627	1.25794
Arpp21	0.0703645	0.707042	0.942662	0.642396	0.655225	0.39177	1.18313	0.700103	0.407853	1.06035	0.249976	0.0970344	0.521901	0.423024	0.750595	0.881374	0.39157	0.413517	0.290293	0.183091	0.244348
Arrb1	0.237206	0	0.486866	0.405465	0.356955	0.538948	0.515346	0.510983	0.594747	0.48061	0.370357	0.329067	0.559616	0.60489	0.43988	0.541258	0.419034	0.396766	0.42259	0.326308	0.400517
Arrb2	0.182091	0.631584	0.311399	0.287682	0.337317	0.370004	0.262895	0.257208	0.22481	0.234716	0.319584	0.396202	0.252413	0.291925	0.360992	0.449498	0.343612	0.263084	0.358804	0.136757	0.293949
Arrdc1	0.140384	0.253103	0.126247	0.124677	0.103979	0.0793559	0.111855	0.141617	0.108483	0.0940738	0.0682699	0.0689989	0.0637324	0.0837011	0.108944	0.0844068	0.126932	0.0966238	0.0743873	0.0757398	0.0847315
Arrdc2	0	0.0928896	0.063249	0.0416546	0.0832372	0.0420437	0.0768474	0.0428823	0.0651712	0.0551537	0.0310509	0.0536827	0.0459022	0.0335133	0.0439006	0.023472	0.0495665	0.0423261	0.0332127	0.0469142	0.0385509
Arrdc3	0.0563083	0.0464949	0.101094	0.0624594	0.17104	0.130471	0.116222	0.115028	0.130068	0.10211	0.101276	0.074101	0.122145	0.0892669	0.0952137	0.112439	0.0660676	0.0785482	0.0869465	0.100912	0.0924134
Arrdc4	0.0844068	0.069711	0.0758765	0.0416546	0.0832372	0.065374	0.0768474	0.125674	0.083753	0.0900532	0.0868473	0.0766513	0.0586399	0.0558369	0.0852168	0.0563083	0.0792558	0.0745278	0.0743873	0.0757398	0.0667884
Arsa	0.042241	0.0464949	0.113679	0.165905	0.181297	0.135103	0.164098	0.197113	0.166926	0.11549	0.142376	0.147799	0.129738	0.122598	0.151242	0.107772	0.125292	0.138668	0.11316	0.115268	0.117978
Arsb	0.140384	0.069711	0.113679	0.145321	0.25756	0.153601	0.271382	0.24161	0.163862	0.176737	0.229855	0.19568	0.124677	0.144745	0.238632	0.145031	0.19869	0.202247	0.144967	0.183091	0.168862
Arsg	0.014084	0	0.0506113	0.0624594	0.0312449	0.0373745	0.0241735	0.0509163	0.0155273	0.0269147	0.0227724	0.0434646	0.0229572	0.0279293	0.0301084	0.014084	0.021486	0.0141124	0.0274879	0.0721396	0.0205641
Arsj	0	0	0.0126579	0	0.00520831	0.0140182	0.0175815	0.00268096	0.0155273	0.00269179	0.0351894	0.00255754	0	0.00558656	0.00878282	0.0797277	0.00826437	0.0241912	0.0251978	0.00722015	0.0128531
Arsk	0.042241	0	0.0506113	0.0624594	0.0156244	0.0186905	0.0197789	0.0268064	0.0217374	0.0228782	0.0310509	0.0204589	0.0229572	0.00558656	0.0213284	0.0281653	0.0148755	0.0302373	0.0114545	0.0144399	0.00514137
Artn	0	0	0.0253138	0.0208318	0.0260387	0.0280337	0.0417461	0.0187657	0.0217374	0.0228782	0.0269119	0.0153447	0.0280575	0.016759	0.0163104	0.0375499	0.00991719	0.0282221	0.0217623	0.0036101	0.0154236
Arv1	0.0281653	0.069711	0.0253138	0.0832372	0.0416546	0.0280337	0.0329611	0.0428823	0.0372585	0.0390211	0.0476011	0.0511286	0.040805	0.0502582	0.0439006	0.0328579	0.0462645	0.0342675	0.0320678	0.0397008	0.0385509
Arvcf	0.014084	0.116019	0.0884921	0.0624594	0.150473	0.167441	0.142376	0.138963	0.160797	0.13952	0.146474	0.0817503	0.106939	0.0892669	0.182178	0.126424	0.123652	0.112665	0.127944	0.0757398	0.0975317
Arxes1	0.331901	0.139086	0.359307	0.267627	0.391002	0.285812	0.379813	0.293361	0.407853	0.309953	0.331376	0.277745	0.333092	0.386921	0.497425	0.305103	0.351401	0.419077	0.331794	0.319449	0.376636
Arxes2	0.745812	0.5326	0.854265	0.607727	0.949646	0.653432	0.794917	0.864209	0.999165	0.762445	0.789195	0.692636	0.807349	0.816736	1.04268	0.781754	0.870815	0.924885	0.666593	0.705376	0.74626
As3mt	0.126424	0.0232537	0.0506113	0	0.165905	0.097974	0.247999	0.272745	0.0961252	0.312519	0.103336	0.0230159	0.286866	0.302622	0.625841	0.453752	0.651989	0.368612	0.264931	0.168871	0.166327
Asah1	0.223487	0.428616	0.201172	0.287682	0.282679	0.330404	0.392075	0.301061	0.344101	0.367197	0.20356	0.173048	0.323414	0.302622	0.212942	0.250881	0.214872	0.243553	0.275979	0.172429	0.289019
Asah2	0	0	0.0126579	0	0.0260387	0.0140182	0.015384	0.0294863	0.0217374	0.0188414	0.0103518	0.00255754	0.0229572	0.016759	0.00627348	0.00469482	0.01157	0.00806443	0.016036	0.0180496	0.035982
Asap1	0.0703645	0.612199	0.881374	0.790169	0.462501	0.785766	0.699728	0.463155	0.475649	0.458831	0.457945	0.454752	0.286866	0.468685	0.237412	0.632941	0.30437	0.332546	0.505158	0.383995	0.675055
Asap2	0.690328	0.116019	0.371166	0.227207	0.476549	0.272323	0.277734	0.349415	0.275986	0.291933	0.269999	0.290034	0.284415	0.227093	0.299156	0.282608	0.162915	0.19038	0.252742	0.232555	0.251829
Asap3	0.0281653	0.0464949	0.0506113	0.0208318	0.0312449	0.0280337	0.0285675	0.0241263	0.0279467	0.0215327	0.0207025	0.0230159	0.040805	0.0390962	0.0125467	0.0281653	0.0181808	0.00806443	0.0217623	0.0144399	0.0308434
Asb1	0.0844068	0.069711	0.238246	0.0624594	0.227207	0.116558	0.202999	0.194482	0.142376	0.176737	0.179164	0.145269	0.137323	0.13368	0.174768	0.149675	0.133488	0.0765382	0.137028	0.0721396	0.102647
Asb13	0.182091	0.207804	0.225921	0.32745	0.150473	0.199606	0.179258	0.178672	0.163862	0.154167	0.144425	0.0995796	0.259822	0.248821	0.0877168	0.0937593	0.112161	0.18047	0.190147	0.168871	0.156177
Asb16	0	0	0.126247	0.0208318	0.0676567	0.0700362	0.0527228	0.066974	0.133147	0.0618717	0.0186325	0.01023	0.0789994	0.0837011	0.0388861	0.0563083	0.0479155	0.0302373	0.0892286	0.021659	0.0282739
Asb18	0	0	0.0126579	0	0	0.00934566	0.0087911	0.0053619	0.00621114	0.00807528	0.00207039	0.00767256	0.00255102	0.00558656	0.00752816	0.00469482	0.00165289	0.00604835	0.00229095	0	0.00771201
Asb2	0.140384	0	0.0126579	0.0416546	0.0364503	0.0513793	0.00439559	0.00268096	0.00621114	0.00672942	0.0103518	0.00767256	0.0153055	0.011173	0.0100375	0.00469482	0.00495866	0.0100805	0.0068728	0.0288769	0.0102826
Asb3	0.0844068	0.253103	0.101094	0.103979	0.140166	0.0886688	0.138023	0.149576	0.154662	0.13552	0.144425	0.124994	0.144901	0.105947	0.153723	0.121765	0.125292	0.120675	0.109745	0.104503	0.0924134
Asb4	0.0563083	0.0232537	0.0379656	0.103979	0.0260387	0.0420437	0.23091	1.00805	0.0744653	0.100771	1.0072	1.40524	0.0229572	0.0223445	0.0276	0.0281653	0.105589	0.0986303	0.127944	0.0793391	0.0436879
Asb5	0	0	0	0	0.0104165	0.0140182	0.015384	0.0241263	0.00931664	0.00942113	0.00621114	0.00255754	0.00510202	0.011173	0.0112921	0.00469482	0.00661152	0.00604835	0.00572735	0	0.00771201
Asb6	0.0844068	0.139086	0.151321	0.145321	0.140166	0.107271	0.114038	0.141617	0.0961252	0.114153	0.113627	0.0970344	0.0917081	0.0837011	0.107696	0.0844068	0.084198	0.0684948	0.0880876	0.0577297	0.0796074
Asb7	0.0844068	0.0928896	0.126247	0.186418	0.150473	0.125836	0.138023	0.162819	0.123906	0.146181	0.121851	0.150328	0.117079	0.122598	0.151242	0.121765	0.140038	0.142661	0.126808	0.0937255	0.0924134
Asb8	0.140384	0.069711	0.213563	0.307625	0.262597	0.272323	0.284076	0.329145	0.305772	0.271225	0.321552	0.250567	0.264753	0.433246	0.345648	0.32745	0.275828	0.257234	0.231601	0.236068	0.241851
Ascc1	0.16822	0.16208	0.213563	0.287682	0.181297	0.167441	0.209454	0.236398	0.20356	0.237335	0.209641	0.228193	0.185165	0.221644	0.212942	0.16822	0.258276	0.198295	0.161949	0.136757	0.239353
Ascc2	0.042241	0.16208	0.101094	0.124677	0.0624594	0.0420437	0.0812293	0.0936966	0.0558715	0.0900532	0.0806579	0.074101	0.0433538	0.0837011	0.0939646	0.089084	0.0973667	0.0785482	0.045803	0.0397008	0.0590916
Ascc3	0.042241	0.253103	0.250535	0.0832372	0.277668	0.148981	0.247999	0.244214	0.212679	0.171434	0.213691	0.205707	0.149948	0.216189	0.189578	0.112439	0.154753	0.178486	0.159687	0.0685384	0.184049
Ascl1	0.0281653	0	0.0126579	0.103979	0.0416546	0.0280337	0.0571118	0.0187657	0.00310559	0.0484333	0.0889097	0.0179019	0.00510202	0.00558656	0.0112921	0.0281653	0.0181808	0.00806443	0.0125999	0.0180496	0.0693531
Asf1a	0.237206	0.16208	0.126247	0.145321	0.0987975	0.0840133	0.12713	0.104368	0.102306	0.108803	0.134173	0.089395	0.147425	0.128141	0.112685	0.0844068	0.0924303	0.106653	0.0983522	0.115268	0.110316
Asf1b	0.014084	0	0.0253138	0.0416546	0.0208318	0.0233624	0.0197789	0.0214461	0.0217374	0.0148043	0.012422	0.00255754	0.0102039	0.0279293	0.00627348	0.014084	0.00826437	0.00806443	0.0068728	0.00722015	0.0102826
Asgr1	0	0	0	0	0.00520831	0	0	0	0.00310559	0.00538355	0.00207039	0	0.00255102	0	0	0	0.00165289	0.00201613	0.00343642	0.267555	0
Ash1l	0.723846	0.230511	0.680441	0.693147	0.821204	0.746474	0.780004	0.85265	0.80239	0.754172	0.677756	0.75488	0.717457	0.762058	0.761215	0.734866	0.701391	0.729832	0.675876	0.620132	0.677133
Ash2l	0.26451	0.207804	0.163823	0.32745	0.267627	0.281321	0.31352	0.303624	0.218748	0.267329	0.233887	0.230685	0.29665	0.265042	0.253244	0.209727	0.248669	0.19038	0.223786	0.12602	0.189102
Asic1	0.042241	0.385713	0.335446	0.518166	0.272651	0.308183	0.369553	0.346888	0.326468	0.320207	0.341169	0.319352	0.252413	0.227093	0.226417	0.419511	0.352956	0.294128	0.325276	0.147479	0.313601
Asic2	0.0281653	0.139086	0.464165	0.386164	0.176171	0.172047	0.252261	0.212866	0.364543	0.365937	0.309724	0.280206	0.442091	0.473704	0.522895	0.31853	0.309104	0.506314	0.541328	0.214947	0.214294
Asic3	0	0.18499	0.0126579	0.0416546	0.00520831	0.00467288	0.0109888	0.0134044	0.00310559	0.010767	0.00621114	0.00255754	0.0178562	0.00558656	0.00250941	0.00938953	0.00661152	0.00604835	0.0125999	0.00722015	0.00771201
Asic4	0	0.069711	0	0.0208318	0.00520831	0.00467288	0.0285675	0.0294863	0.0248422	0.00942113	0.00414077	0.00255754	0.0357067	0.00558656	0.00752816	0.00938953	0.00661152	0.00806443	0.00229095	0.0288769	0.0770446
Asl	0.126424	0.16208	0.163823	0.347152	0.252516	0.299252	0.190062	0.236398	0.278976	0.204494	0.191376	0.183118	0.308842	0.259643	0.153723	0.172847	0.17595	0.19038	0.300169	0.197274	0.342858
Asna1	0.656125	0.16208	0.596841	0.642396	0.443637	0.599038	0.600598	0.614705	0.530644	0.518807	0.504239	0.436166	0.632911	0.66498	0.565379	0.516617	0.521494	0.394898	0.476597	0.521206	0.516564
Asns	0.487502	0.207804	0.188751	0.206855	0.196647	0.23157	0.303033	0.306185	0.215714	0.243874	0.237915	0.215714	0.34274	0.433246	0.272645	0.287119	0.394635	0.23179	0.220433	0.518034	0.3307
Asnsd1	0.0281653	0.16208	0.063249	0.0416546	0.114334	0.097974	0.118404	0.154876	0.0868473	0.106126	0.11157	0.150328	0.175124	0.105947	0.211715	0.135733	0.15312	0.0966238	0.0972122	0.0613334	0.112871
Aspa	0.0563083	0	0.0126579	0.0208318	0.0416546	0.0513793	0.0351576	0.0241263	0.0248422	0.0309506	0.0269119	0.0281293	0.0229572	0.0335133	0.0326166	0.023472	0.0231384	0.0322525	0.0148906	0.0829374	0.0179939
Aspdh	0.0281653	0.069711	0.0379656	0	0.0208318	0.00467288	0.0109888	0.0134044	0.012422	0.0148043	0.012422	0.0204589	0.0127548	0.0223445	0.0100375	0.00938953	0.01157	0.0181442	0.0114545	0.021659	0.0102826
Asph	0.799415	0.68849	0.359307	0.405465	0.504382	0.543012	0.454518	0.433971	0.404987	0.527072	0.378091	0.343584	0.416431	0.453562	0.397248	0.32745	0.337366	0.362947	0.444548	0.309132	0.516564
Asphd1	0.112439	0	0.113679	0.186418	0.217042	0.139732	0.218048	0.233789	0.191376	0.200537	0.138275	0.0792011	0.13985	0.150272	0.196967	0.112439	0.180831	0.142661	0.0949318	0.122438	0.105204
Asphd2	0.223487	0.0232537	0.680441	0.676397	0.633791	0.657254	0.57447	0.621423	0.573612	0.551669	0.827676	0.649101	0.530838	0.547633	0.631051	0.690328	0.741678	0.450348	0.505158	0.298784	0.547994
Aspscr1	0.154316	0.470787	0.225921	0.247466	0.342238	0.378731	0.300932	0.311302	0.272994	0.275117	0.366482	0.358031	0.316136	0.376516	0.313533	0.305103	0.280601	0.315314	0.2483	0.218474	0.259295
Asrgl1	0.423818	0.230511	0.3474	0.287682	0.30265	0.30372	0.317705	0.324057	0.352879	0.260828	0.305772	0.233175	0.20519	0.270435	0.133853	0.218905	0.185708	0.18047	0.275979	0.239579	0.239353
Ass1	0.537171	0.18499	0.382974	0.424624	0.730226	0.606909	0.452528	0.557759	0.492295	0.655861	0.372293	0.152857	0.660174	0.718648	0.752531	0.512482	0.779715	0.63907	0.393012	0.246591	0.530093
Aste1	0.0984325	0.253103	0.063249	0.0416546	0.124677	0.111916	0.0965532	0.085686	0.0930334	0.103449	0.0950947	0.091942	0.0484504	0.066989	0.0664505	0.089084	0.0809034	0.0684948	0.0698173	0.0793391	0.0616576
Astn1	0.042241	0.18499	0.639133	0.386164	0.914134	0.485387	0.867317	0.775216	0.716583	0.673381	0.621696	0.525368	0.564006	0.542785	0.78887	0.541258	0.627436	0.576417	0.489903	0.200814	0.402893
Astn2	0.154316	0.0232537	0.163823	0.481212	0.176171	0.111916	0.157589	0.0616232	0.102306	0.114153	0.140326	0.0511286	0.318564	0.438341	0.234971	0.182091	0.118729	0.114668	0.125671	0.100912	0.0667884
Asxl1	0.140384	0.116019	0.201172	0.186418	0.186418	0.204186	0.211604	0.246816	0.236908	0.234716	0.175087	0.147799	0.162549	0.161311	0.232529	0.209727	0.214872	0.164579	0.151765	0.0829374	0.140921
Asxl2	0.305103	0.18499	0.188751	0.366725	0.272651	0.276825	0.307232	0.336762	0.355799	0.275117	0.323519	0.294938	0.277054	0.227093	0.300357	0.250881	0.26786	0.241595	0.219314	0.161749	0.199194
Asxl3	0.0281653	0.0464949	0.063249	0.145321	0.17104	0.17665	0.138023	0.146924	0.142376	0.132852	0.187309	0.112296	0.112011	0.0948299	0.146278	0.200531	0.149852	0.0684948	0.115436	0.0577297	0.110316
Atad1	0.512482	0.470787	0.335446	0.462501	0.476549	0.468638	0.515346	0.529822	0.404987	0.509321	0.429717	0.46399	0.474356	0.417897	0.427281	0.474904	0.501081	0.393029	0.394074	0.433909	0.381429
Atad2	0.014084	0.0232537	0.0506113	0.0832372	0.0676567	0.0607104	0.0483328	0.072323	0.077562	0.0403659	0.049669	0.0281293	0.040805	0.072562	0.0338706	0.0656805	0.0413106	0.0443403	0.045803	0.0793391	0.0411195
Atad2b	0.112439	0.2979	0.0758765	0.145321	0.160765	0.204186	0.153246	0.186583	0.166926	0.182035	0.181201	0.140205	0.127208	0.144745	0.173532	0.172847	0.118729	0.106653	0.1495	0.12602	0.171396
Atad3a	0.112439	0.552806	0.1763	0.366725	0.191535	0.217898	0.181421	0.254613	0.188326	0.230786	0.189343	0.198189	0.202691	0.237971	0.244727	0.177471	0.205169	0.168556	0.181138	0.200814	0.194151
Atad3aos	0	0	0.0126579	0.0208318	0.0260387	0.00934566	0.0175815	0.0214461	0.0155273	0.0134585	0.0269119	0.0127874	0.0178562	0.0279293	0.0263458	0	0.00495866	0.00604835	0.0125999	0.0144399	0.00771201
Atad5	0.014084	0.0232537	0.0379656	0.103979	0.0572604	0.0420437	0.0351576	0.0348455	0.0248422	0.0215327	0.0310509	0.0562363	0.0229572	0.0279293	0.0276	0.0516203	0.0347038	0.0241912	0.0377917	0.0252681	0.0231342
Atat1	0.250881	0.275569	0.371166	0.642396	0.400653	0.413361	0.472348	0.576167	0.349956	0.479405	0.595622	0.505101	0.378642	0.433246	0.553487	0.457998	0.473066	0.428316	0.325276	0.253591	0.318495
Atcay	0.410877	0.275569	0.700725	0.939089	0.693147	0.757289	0.763263	0.87377	0.781379	0.809167	0.691076	0.698764	0.662254	0.727425	0.730119	0.727528	0.730085	0.697979	0.657259	0.521206	0.742275
Atcayos	0	0.0232537	0.0379656	0.0624594	0.0156244	0.0373745	0.0219763	0.0268064	0.0248422	0.0215327	0.0103518	0.0127874	0.0178562	0.0335133	0.017565	0.0281653	0.0198334	0.0181442	0.0171813	0	0.0102826
Ate1	0.767477	0.275569	0.942662	0.790169	0.991064	0.887967	0.876704	0.969506	0.909635	0.904967	0.904605	0.865003	0.879569	0.753471	0.989686	0.87805	0.862549	0.884222	0.818457	0.764484	0.793309
Atf1	0.154316	0.18499	0.201172	0.124677	0.176171	0.167441	0.120587	0.165464	0.173048	0.134186	0.134173	0.130068	0.182656	0.161311	0.194505	0.186707	0.172694	0.144656	0.119987	0.12602	0.125633
Atf2	0.632941	0.2979	0.798481	0.607727	0.758486	0.731938	0.822688	0.799472	0.80239	0.719583	0.730403	0.733068	0.893944	0.804292	0.820664	0.723846	0.779715	0.7076	0.715221	0.589761	0.645703
Atf3	0.0703645	0.139086	0.0379656	0	0.0156244	0.0420437	0.0241735	0.0268064	0.0186325	0.0188414	0.0227724	0.0306857	0.0102039	0.0279293	0.0276	0.0563083	0.0347038	0.0241912	0.0171813	0.0397008	0.0334128
Atf4	0.861314	0.707042	0.750361	1.17143	0.88872	0.907562	0.925732	0.949806	0.706756	0.918007	0.835254	0.702838	1.06971	0.950723	1.19232	0.871379	1.03697	0.848201	0.702514	1.09355	0.789443
Atf5	0.182091	0	0.0884921	0.165905	0.17104	0.0793559	0.0987406	0.0963655	0.0899408	0.0591848	0.249976	0.228193	0.117079	0.111501	0.151242	0.0797277	0.07596	0.0906018	0.0743873	0.218474	0.0719174
Atf6	0.042241	0	0.0758765	0.0624594	0.103979	0.107271	0.0658864	0.0883568	0.099216	0.0659011	0.0909718	0.0792011	0.0840846	0.105947	0.0526733	0.112439	0.0561688	0.080558	0.0652458	0.0649363	0.0539584
Atf6b	0.126424	0.18499	0.151321	0.165905	0.103979	0.167441	0.124949	0.112364	0.099216	0.123508	0.160797	0.114837	0.0993264	0.144745	0.143795	0.117103	0.126932	0.116671	0.100632	0.154618	0.110316
Atf7	0.0563083	0.0232537	0.0506113	0.124677	0.0728522	0.0700362	0.0680793	0.0910271	0.0651712	0.0712721	0.0517368	0.0230159	0.0535458	0.0614139	0.0677023	0.0797277	0.0825508	0.0463544	0.0503796	0.0685384	0.0590916
Atf7ip	0.371666	0.407253	0.287176	0.386164	0.471876	0.330404	0.383907	0.463155	0.379056	0.335526	0.321552	0.365228	0.220156	0.291925	0.33854	0.322993	0.366918	0.255283	0.272668	0.243086	0.23185
Atg10	0.112439	0.0232537	0.151321	0.145321	0.145321	0.172047	0.179258	0.210244	0.148522	0.176737	0.20356	0.208211	0.172611	0.221644	0.308748	0.163589	0.27742	0.225896	0.167599	0.115268	0.186576
Atg101	0.384799	0.16208	0.250535	0.32745	0.322505	0.343663	0.359255	0.339297	0.326468	0.286767	0.329414	0.345996	0.364335	0.397287	0.325466	0.291624	0.294881	0.324899	0.273772	0.350199	0.31115
Atg12	0.223487	0.139086	0.311399	0.32745	0.429391	0.39177	0.422484	0.416783	0.407853	0.353304	0.406898	0.350816	0.385769	0.345067	0.415772	0.31853	0.362272	0.330636	0.319834	0.211418	0.3307
Atg13	0.154316	0.0928896	0.213563	0.424624	0.332387	0.281321	0.460477	0.503875	0.379056	0.362153	0.32745	0.333914	0.345147	0.355587	0.33498	0.345215	0.274236	0.274756	0.284794	0.168871	0.291485
Atg14	0.0703645	0.0928896	0.126247	0.0416546	0.135006	0.144358	0.172766	0.194482	0.130068	0.13552	0.134173	0.142737	0.114545	0.216189	0.154962	0.158954	0.146582	0.128677	0.0972122	0.0649363	0.120531
Atg16l1	0.0703645	0.275569	0.188751	0.247466	0.252516	0.17665	0.271382	0.293361	0.206602	0.216343	0.231871	0.180602	0.225134	0.194306	0.230085	0.223487	0.182457	0.178486	0.160818	0.0757398	0.176461
Atg16l2	0.16822	0.407253	0.113679	0.186418	0.211951	0.135103	0.100927	0.154876	0.151593	0.150175	0.197472	0.170528	0.0967876	0.139215	0.154962	0.13108	0.143311	0.120675	0.138163	0.0721396	0.148553
Atg2a	0.0844068	0.0928896	0.101094	0.186418	0.145321	0.130471	0.12713	0.160172	0.133147	0.132852	0.136224	0.0792011	0.132267	0.111501	0.125144	0.117103	0.108876	0.0946168	0.117712	0.0865346	0.0821697
Atg2b	0.042241	0.0464949	0.113679	0.165905	0.0624594	0.0886688	0.12931	0.104368	0.102306	0.0806662	0.099216	0.0970344	0.071368	0.117051	0.0689541	0.0656805	0.0495665	0.0644715	0.0892286	0.0360932	0.0539584
Atg3	0.712749	0.207804	0.418092	0.554481	0.32745	0.321534	0.286187	0.308744	0.293888	0.295802	0.315643	0.304725	0.390509	0.350332	0.314728	0.35847	0.338928	0.263084	0.281491	0.288404	0.291485
Atg4a	0	0	0.0126579	0.0624594	0.0156244	0.0186905	0.0131864	0.0107237	0.0155273	0.0121128	0.0144922	0.01023	0.0153055	0.0223445	0.0100375	0.023472	0.0132228	0.0120965	0.0114545	0.021659	0.0128531
Atg4b	0.112439	0.116019	0.311399	0.32745	0.30265	0.290298	0.367496	0.389537	0.338234	0.345698	0.289917	0.297387	0.291761	0.297278	0.291946	0.32745	0.30121	0.243553	0.268249	0.183091	0.214294
Atg4c	0.112439	0.116019	0.188751	0.267627	0.252516	0.236118	0.23091	0.202369	0.230863	0.175411	0.199502	0.210713	0.225134	0.18882	0.217846	0.259972	0.19058	0.202247	0.190147	0.143907	0.163791
Atg4d	0.278092	0.449795	0.188751	0.405465	0.232281	0.195023	0.209454	0.204996	0.163862	0.199218	0.173048	0.147799	0.20519	0.2434	0.169822	0.200531	0.197069	0.128677	0.184518	0.18664	0.196673
Atg5	0.154316	0.069711	0.1763	0.186418	0.227207	0.258784	0.29462	0.311302	0.305772	0.285474	0.262003	0.240638	0.38814	0.297278	0.312337	0.228065	0.264668	0.263084	0.241628	0.229039	0.276663
Atg7	0.0281653	0.0232537	0.126247	0.145321	0.0416546	0.097974	0.0768474	0.0910271	0.0961252	0.0712721	0.0620719	0.091942	0.0586399	0.0614139	0.107696	0.112439	0.0743118	0.0624594	0.0641027	0.0757398	0.0770446
Atg9a	0.112439	0.449795	0.486866	0.572395	0.391002	0.430504	0.39615	0.451039	0.390612	0.369716	0.333337	0.343584	0.299092	0.392109	0.370394	0.362876	0.337366	0.334455	0.299073	0.183091	0.308698
Atg9b	0.0563083	0.0464949	0.238246	0.267627	0.277668	0.208761	0.267141	0.257208	0.341169	0.243874	0.297854	0.333914	0.119613	0.117051	0.142553	0.259972	0.169436	0.120675	0.220433	0.0829374	0.166327
Atic	0.0844068	0.230511	0.188751	0.287682	0.211951	0.144358	0.168433	0.210244	0.11774	0.209764	0.219759	0.319352	0.101865	0.0892669	0.166111	0.205131	0.128571	0.140665	0.12908	0.108093	0.133281
Atl1	0.35847	0.512193	0.61811	0.443637	0.616457	0.680012	0.72061	0.691538	0.74571	0.645928	0.662645	0.71903	0.57712	0.687551	0.791702	0.806422	0.660098	0.649029	0.575884	0.316014	0.570147
Atl2	0.140384	0.2979	0.201172	0.206855	0.206855	0.135103	0.213753	0.22334	0.206602	0.222914	0.197472	0.165484	0.200191	0.259643	0.243509	0.214318	0.200311	0.200271	0.126808	0.168871	0.204233
Atl3	0.0281653	0.139086	0.0253138	0.0416546	0.0260387	0.046712	0.0197789	0.0562706	0.0341548	0.0390211	0.0165624	0.0179019	0.0255074	0.0446779	0.0376323	0.0187782	0.0231384	0.0342675	0.0229075	0.0324853	0.0257041
Atm	0.0281653	0.069711	0.0506113	0.0832372	0.0728522	0.046712	0.0549174	0.066974	0.046567	0.0578412	0.0620719	0.0842991	0.056093	0.066989	0.0739602	0.0750469	0.0627687	0.0322525	0.045803	0.0288769	0.0334128
Atmin	0.291624	0.16208	0.486866	0.405465	0.386164	0.294778	0.357191	0.351939	0.367451	0.332978	0.303794	0.304725	0.303971	0.407613	0.285925	0.371666	0.27742	0.301847	0.349108	0.111681	0.289019
Atn1	0.384799	0.18499	0.520483	0.443637	0.554481	0.551114	0.60615	0.598933	0.517028	0.535304	0.515205	0.532081	0.439769	0.438341	0.521794	0.565602	0.52729	0.439357	0.450785	0.277994	0.461583
Atoh7	0.0281653	0.0232537	0.0758765	0.0208318	0.0416546	0.0373745	0.0285675	0.0268064	0.0310509	0.0174957	0.0372585	0.033242	0.0127548	0.0558369	0.0301084	0.0375499	0.0181808	0.0241912	0.0583861	0.136757	0.0334128
Atox1	1.38547	1.10788	1.75663	1.68524	1.62377	1.65931	1.62037	1.69256	1.50838	1.54427	1.5753	1.75769	1.47402	1.63994	1.63811	1.68576	1.68196	1.43821	1.64404	1.6111	1.52987
Atp11a	0.345215	1.32301	0.0506113	0.145321	0.222127	0.135103	0.166266	0.197113	0.133147	0.152836	0.16284	0.140205	0.177636	0.166823	0.156202	0.149675	0.103945	0.114668	0.126808	0.33657	0.112871
Atp11b	0.462236	0.449795	0.299308	0.32745	0.287682	0.330404	0.267141	0.331686	0.278976	0.326599	0.354826	0.28758	0.249941	0.313286	0.35392	0.322993	0.26786	0.263084	0.253851	0.18664	0.28161
Atp11c	0.014084	0.069711	0.0884921	0.0832372	0.114334	0.0746969	0.0702718	0.0589471	0.0372585	0.0390211	0.0579386	0.0792011	0.0306075	0.0614139	0.0601895	0.0703645	0.0462645	0.0302373	0.0503796	0.0360932	0.0539584
Atp13a1	0.042241	0.16208	0.101094	0.0624594	0.114334	0.144358	0.144551	0.157525	0.0806579	0.112816	0.0889097	0.119917	0.104402	0.072562	0.127633	0.154316	0.117088	0.0906018	0.0858053	0.0541252	0.0796074
Atp13a2	0.237206	0.16208	0.564478	0.554481	0.419848	0.587169	0.430532	0.477612	0.439163	0.410946	0.425928	0.443153	0.411737	0.498632	0.415772	0.49586	0.473066	0.33827	0.395135	0.179539	0.350129
Atp13a3	0.0984325	0.0464949	0.151321	0.206855	0.337317	0.258784	0.256518	0.254613	0.24596	0.232096	0.2238	0.228193	0.20519	0.237971	0.269015	0.259972	0.216487	0.24551	0.218196	0.115268	0.23185
Atp13a4	0.014084	0	0.0126579	0.0208318	0.0260387	0.0327045	0.0197789	0.0214461	0.0155273	0.0134585	0.00828148	0.0204589	0.00765299	0.0279293	0.00878282	0.00938953	0.021486	0.00806443	0.00801824	0.0288769	0.00514137
Atp13a5	0	0	0	0	0.00520831	0.00467288	0.00659336	0.00268096	0.00931664	0.00269179	0.00621114	0.00767256	0.00510202	0	0.0050188	0.00469482	0.00661152	0.00806443	0.00343642	0.0108301	0.00771201
Atp1a1	0.26451	0.364001	0.486866	0.366725	0.52274	0.356863	0.367496	0.580742	0.538771	0.446643	0.700996	0.549873	0.217665	0.199786	0.320698	0.32745	0.412956	0.24551	0.510219	0.595875	0.482361
Atp1a2	0.223487	0.592607	0.335446	0.625145	0.629474	0.299252	0.422484	0.527476	0.500571	0.372233	0.315643	0.48464	0.27951	0.291925	0.451276	0.419511	0.498148	0.301847	0.252742	0.463382	0.286551
Atp1a3	1.7868	1.88953	2.02486	2.29596	1.84608	2.193	2.00162	1.97196	1.99267	1.98604	1.92837	1.90235	1.96572	2.04758	1.99612	2.10039	2.03531	1.88634	1.91395	1.94418	2.05337
Atp1b1	2.88407	2.21187	2.69645	3.33348	2.42361	3.05253	2.71725	2.93235	2.56608	2.90424	2.67554	2.64953	2.63141	2.61283	2.65084	2.72327	2.75743	2.6149	2.60313	3.05003	2.87511
Atp1b2	0.995984	0.864833	1.27289	1.11105	0.970515	1.0864	0.990399	1.00805	1.12016	1.07607	0.898833	0.92587	0.886775	1.09973	1.12124	1.17242	0.854235	0.952244	1.00891	1.1384	1.052
Atp1b3	0.500028	0.428616	0.382974	0.607727	0.742399	0.622551	0.763263	0.842946	0.71903	0.65035	0.655886	0.505101	0.600929	0.468685	0.531683	0.479111	0.534512	0.473987	0.507184	0.460126	0.493822
Atp23	0.0703645	0	0.0758765	0.0832372	0.0728522	0.0793559	0.0790386	0.0990337	0.0868473	0.0659011	0.0600054	0.0434646	0.056093	0.0837011	0.103953	0.0703645	0.0792558	0.0785482	0.0709599	0.0541252	0.0744812
Atp2a2	0.745812	0.725388	1.14824	1.3259	1.16256	1.38794	1.18436	1.18506	1.0811	1.1884	0.978871	0.950175	1.23511	1.19631	1.02685	1.13744	0.970761	0.910997	1.11703	1.06273	1.09604
Atp2b1	1.39865	1.40124	1.81041	1.41533	1.35398	1.37024	1.57247	1.20734	1.34803	1.30552	1.63213	1.69688	2.21101	2.629	2.75952	2.21797	2.46814	2.35237	1.60626	1.96224	1.41923
Atp2b2	0.723846	0.707042	0.907972	1.21766	0.58129	1.01956	0.838785	0.987168	0.945743	0.821121	0.649101	0.447799	0.751284	0.987775	0.698409	0.958847	0.807023	0.652336	0.789414	0.722488	0.851988
Atp2b3	0.209727	0	0.163823	0.145321	0.0936132	0.199606	0.12931	0.0990337	0.114655	0.0980929	0.109512	0.107211	0.0789994	0.128141	0.103953	0.112439	0.125292	0.0946168	0.115436	0.13318	0.120531
Atp2b4	0.042241	0.069711	0.3474	1.03451	0.53186	0.731938	0.598744	0.275329	0.511556	0.16878	0.506071	0.22071	0.411737	0.60489	0.664039	0.545336	0.357618	0.389286	0.243853	0.122438	0.34043
Atp2c1	0.436692	0.253103	0.429693	0.462501	0.590144	0.477028	0.653567	0.603453	0.461684	0.53413	0.511556	0.538771	0.462884	0.371298	0.392597	0.371666	0.459673	0.345884	0.464243	0.40074	0.371835
Atp2c2	0	0	0	0	0.0104165	0	0.0021978	0.0160851	0.0186325	0.00942113	0.00414077	0.00511507	0	0	0.0012547	0.014084	0.00991719	0.0161283	0.0068728	0	0
Atp4a	0	0	0	0.0208318	0.0104165	0.0280337	0.0285675	0.0187657	0.00310559	0.0148043	0.012422	0.0179019	0.040805	0.011173	0.0112921	0.023472	0.01157	0.00806443	0.0194719	0.0036101	0.00257069
Atp5a1	2.16725	1.3572	1.68192	1.98837	1.62968	1.90493	1.68216	1.75557	1.69461	1.76206	1.56124	1.62661	1.99883	1.9982	1.47299	1.69247	1.63829	1.69052	1.7434	2.0013	1.95614
Atp5b	2.85541	2.03073	1.82642	2.2405	1.81515	2.16162	1.97444	2.05966	1.88964	2.01324	1.86142	1.92671	2.23449	2.07695	1.76515	1.94553	1.96049	2.00805	2.03023	2.54045	2.19559
Atp5c1	1.77294	1.17526	1.53593	1.80519	1.37149	1.64723	1.48417	1.50657	1.51361	1.48092	1.36998	1.39931	1.74582	1.73197	1.5403	1.60183	1.62271	1.72171	1.61111	1.81502	1.68614
Atp5d	2.37666	1.87569	2.03467	2.43182	1.92784	2.16162	1.94591	1.9535	1.97083	2.00294	1.93659	1.9821	2.26639	2.0419	1.89716	1.98931	1.9467	2.00165	2.03789	2.19396	2.09783
Atp5e	2.4048	2.03671	2.46222	2.40978	2.57161	2.49408	2.59051	2.65843	2.47686	2.6426	2.35186	2.3421	2.45506	2.56186	2.42551	2.41733	2.47755	2.5441	2.50543	2.46593	2.53965
Atp5f1	1.82289	1.62542	1.62106	1.98275	1.38629	1.73548	1.45828	1.48829	1.5794	1.5034	1.4501	1.31282	1.75785	1.75848	1.36099	1.55729	1.4532	1.61916	1.58078	1.88802	1.79044
Atp5g1	2.74453	2.46072	2.76542	2.90942	2.7241	2.86465	2.86439	2.95906	2.76563	2.89893	2.56719	2.50057	2.66977	2.83306	2.74164	2.81755	2.85758	2.79112	2.85121	2.81297	2.78124
Atp5g2	1.74467	1.3572	1.5149	1.9189	1.82009	1.67465	1.78526	1.8386	1.84272	1.76386	1.75295	1.69052	1.73366	1.6969	1.68095	1.55349	1.79145	1.7349	1.69568	1.82187	1.72057
Atp5g3	2.50329	1.80363	2.45361	2.71796	2.27605	2.60436	2.41096	2.43233	2.3454	2.39869	2.2414	2.25784	2.57584	2.49453	2.15039	2.3361	2.24476	2.23227	2.46893	2.42303	2.55247
Atp5h	2.91041	2.20682	2.46863	2.79694	2.42544	2.67855	2.47465	2.47265	2.50949	2.53297	2.43003	2.35276	2.73744	2.5839	2.31661	2.50023	2.34435	2.47136	2.58388	2.75977	2.651
Atp5j	2.9435	2.39139	2.9018	3.04876	2.75096	2.96417	2.84776	2.85727	2.80944	2.81464	2.66985	2.6807	2.98339	2.87288	2.66014	2.81138	2.75931	2.75754	2.89874	2.98956	2.95644
Atp5j2	2.70217	2.42461	2.827	2.91619	2.6923	2.75183	2.76413	2.7698	2.7527	2.77747	2.64879	2.70381	2.68755	2.76252	2.60172	2.80744	2.76575	2.73382	2.87506	2.79026	2.80477
Atp5k	2.52369	2.24163	2.4665	2.87954	2.3901	2.53538	2.48997	2.48736	2.44154	2.45276	2.37274	2.40903	2.58965	2.48348	2.35272	2.43299	2.38891	2.42924	2.51007	2.53875	2.5344
Atp5l	2.94793	2.38716	2.9142	2.97939	2.73021	2.86995	2.85913	2.84306	2.86103	2.81544	2.74808	2.83949	2.89316	2.80111	2.73046	2.78517	2.72667	2.79038	2.93713	2.89464	2.83289
Atp5o.1	2.45644	1.81107	2.06985	2.50876	1.9159	2.16692	2.0161	2.1242	2.07263	2.06255	1.94301	1.90459	2.28042	2.24097	2.00578	2.14363	2.13404	2.10251	2.23934	2.2888	2.2355
Atp5s	0.0703645	0.0232537	0.250535	0.267627	0.186418	0.227017	0.25439	0.249417	0.166926	0.239952	0.217737	0.257998	0.165066	0.237971	0.267804	0.205131	0.239039	0.202247	0.200262	0.0973192	0.196673
Atp6ap1	1.02317	0.725388	0.899162	1.00795	1.11105	1.04027	1.00467	1.05386	0.937333	0.970743	0.907481	0.872302	0.939666	1.05542	1.0084	0.98372	0.921695	0.956301	0.943936	1.07382	0.940106
Atp6ap1l	0	0.0928896	0	0	0.00520831	0.00467288	0.0087911	0.0053619	0	0.00403767	0.0517368	0.00255754	0.00510202	0.011173	0.00250941	0	0.00991719	0.00403225	0.00114548	0.0144399	0.00771201
Atp6ap2	0.891298	0.385713	0.607506	0.836482	0.65948	0.806781	0.690948	0.727636	0.70429	0.661355	0.699347	0.613046	0.846682	0.861483	0.689379	0.767477	0.674866	0.693147	0.660998	0.97513	0.812493
Atp6v0a1	0.756682	0.945646	0.817311	0.866565	1.08289	0.961616	0.974522	0.964162	1.02311	0.93276	0.948535	0.853985	0.883176	1.05542	0.957334	0.955705	0.919422	0.854026	0.864261	0.89408	0.806764
Atp6v0a2	0.0703645	0.0464949	0.0884921	0.186418	0.124677	0.148981	0.153246	0.186583	0.133147	0.118164	0.0806579	0.132603	0.109475	0.117051	0.177239	0.107772	0.123652	0.0926095	0.084664	0.122438	0.0872927
Atp6v0b	2.15765	2.15496	2.03792	2.13921	1.98696	1.90765	1.95266	1.85756	1.94417	1.88603	1.94765	1.9569	1.9734	2.00562	2.01962	1.93363	2.08828	2.10056	1.93717	2.16902	1.99531
Atp6v0c	0	0	0.0126579	0	0.0312449	0.00934566	0.0373539	0.0294863	0.0217374	0.0201871	0.0186325	0.0179019	0.0280575	0.0279293	0.0200739	0.0281653	0.0181808	0.00604835	0.0183266	0	0.0128531
Atp6v0d1	1.2218	0.407253	0.740556	0.774409	0.840277	0.778696	0.833974	0.844892	0.809329	0.837893	0.848796	0.911786	0.877761	0.881374	0.808587	0.802923	0.835049	0.868485	0.765948	1.01041	0.866757
Atp6v0e	0.223487	0.385713	0.287176	0.32745	0.317553	0.158218	0.239463	0.236398	0.227837	0.213713	0.213691	0.190659	0.197689	0.166823	0.267804	0.241769	0.237432	0.170543	0.194645	0.350199	0.221827
Atp6v0e2	1.50491	1.39039	1.83827	1.57525	1.6664	1.57919	1.66705	1.66354	1.74631	1.66237	1.68092	1.79721	1.70262	1.84978	1.70815	1.76672	1.63643	1.73006	1.619	1.61249	1.6806
Atp6v1a	1.7822	1.03665	1.92855	1.99951	2.01463	1.9502	1.98041	1.91478	1.95887	1.88483	1.96145	1.97516	1.84316	1.89179	1.86691	1.94685	1.82001	1.81461	1.89391	1.69765	1.85519
Atp6v1b2	1.79594	1.26368	1.83434	1.65494	1.6702	1.76075	1.68137	1.70206	1.76093	1.68336	1.63602	1.63721	1.6954	1.77885	1.52737	1.78527	1.64815	1.60134	1.70298	1.61801	1.73386
Atp6v1c1	1.28138	0.761461	1.36145	1.38629	1.21482	1.25047	1.20024	1.21613	1.28592	1.17101	1.21243	1.23178	1.33095	1.35531	1.20481	1.25444	1.1466	1.22894	1.25757	1.22541	1.30433
Atp6v1c2	0	0	0	0.0208318	0.0260387	0	0.0351576	0.0134044	0.012422	0.00269179	0.0165624	0.0127874	0.00510202	0.00558656	0.00878282	0	0.00991719	0.00806443	0.00572735	0	0
Atp6v1d	1.44364	1.03665	1.59671	1.55859	1.43193	1.32241	1.46312	1.26339	1.49917	1.34559	1.49432	1.37283	1.39109	1.60815	1.44532	1.51282	1.38989	1.48696	1.46092	1.38905	1.51704
Atp6v1e1	2.39211	1.68541	2.02486	2.10477	1.78838	2.09244	1.80867	1.72823	1.92305	1.82185	1.93073	2.02611	1.95232	2.17797	1.87446	1.96765	1.97003	2.0107	2.01203	2.18678	2.10649
Atp6v1f	2.18929	1.86167	2.24841	2.27922	2.10352	2.21642	2.20768	2.23036	2.18756	2.2007	2.24358	2.33378	2.20824	2.23862	2.20703	2.23995	2.24649	2.24881	2.25634	2.24362	2.2447
Atp6v1g1	1.77758	1.22659	1.93215	2.13436	1.91289	1.93312	1.98457	2.05359	1.90241	2.00152	2.09872	2.19959	2.09718	1.96033	2.10259	1.9586	1.94901	2.02806	1.93003	2.04906	1.92503
Atp6v1g2	2.20782	1.78102	2.36564	2.77647	2.00778	2.56368	1.97743	2.07701	2.51948	2.20569	2.17904	2.19454	2.40194	2.5964	1.92835	2.12722	2.03361	2.28275	2.37749	2.11294	2.42451
Atp6v1h	0.712749	0.552806	0.486866	0.774409	0.563458	0.547067	0.617203	0.61246	0.578918	0.598826	0.542373	0.482355	0.546385	0.709823	0.543704	0.470689	0.480473	0.461288	0.444548	0.35699	0.47776
Atp7a	0.0281653	0.0232537	0	0.0208318	0.0520598	0.0140182	0.0285675	0.0294863	0.0279467	0.0296054	0.0186325	0.0255727	0.0280575	0.0279293	0.0313625	0.0375499	0.0165282	0.0262067	0.0125999	0.0180496	0.0205641
Atp7b	0.0703645	0	0	0	0.0104165	0.00467288	0.00439559	0.0107237	0.012422	0.0148043	0	0.01023	0.00765299	0.016759	0.00627348	0.00938953	0.00661152	0.0141124	0.00916367	0.0036101	0.0102826
Atp8a1	0.31853	0.0928896	0.670206	0.607727	1.05408	0.59509	0.77667	0.729735	1.0072	0.769647	0.771947	0.822303	0.508423	0.762058	0.43187	0.428116	0.723608	0.78561	0.84029	0.479597	0.750236
Atp8a2	0.0281653	0.8481	0.382974	0.32745	0.381317	0.343663	0.454518	0.377061	0.341169	0.393532	0.305772	0.270352	0.220156	0.350332	0.319505	0.309585	0.250272	0.263084	0.252742	0.450328	0.241851
Atp8b1	0	0	0	0	0.0156244	0.00467288	0.0241735	0.00804281	0	0.00134589	0.0165624	0	0.00510202	0	0.00250941	0	0	0	0.00572735	0.0036101	0.00514137
Atp8b2	0.0281653	0.18499	0.101094	0.124677	0.0936132	0.116558	0.100927	0.125674	0.0651712	0.10211	0.0682699	0.0715502	0.0688232	0.066989	0.13261	0.107772	0.07596	0.0523954	0.0709599	0.0649363	0.046256
Atp8b3	0	0.0464949	0.0126579	0.0416546	0.0104165	0.00934566	0.0021978	0.0241263	0.0155273	0.00672942	0.00207039	0.00511507	0.0178562	0.0335133	0.0313625	0.089084	0.039659	0.0141124	0.0103091	0.00722015	0.0154236
Atp9a	0.701576	0.796718	1.19827	1.03451	1.35398	1.15524	1.26057	1.25352	1.21695	1.13076	1.15448	1.10117	1.05078	1.01311	1.10112	1.12647	1.09398	1.01958	1.1642	1.04477	1.07421
Atp9b	0.042241	0.2979	0.163823	0.227207	0.145321	0.204186	0.220194	0.246816	0.188326	0.18865	0.148522	0.173048	0.129738	0.199786	0.206804	0.195927	0.171065	0.124677	0.134758	0.108093	0.14601
Atpaf1	0.195927	0.253103	0.1763	0.247466	0.160765	0.33483	0.239463	0.210244	0.194425	0.187328	0.183238	0.190659	0.281963	0.307958	0.179709	0.331901	0.172694	0.19038	0.182265	0.232555	0.251829
Atpaf2	0.0844068	0.116019	0.262788	0.267627	0.272651	0.162831	0.19869	0.20762	0.248973	0.217658	0.207615	0.142737	0.354757	0.216189	0.188345	0.195927	0.166176	0.166567	0.191271	0.168871	0.229347
Atpif1	2.99822	2.85416	3.00825	3.24021	3.00956	3.06739	3.06506	3.05728	3.08435	3.02882	3.05762	3.03373	3.0761	3.09764	3.10787	3.05939	3.04623	3.08963	3.12655	3.09897	3.05588
Atr	0.0703645	0.491588	0.1763	0.124677	0.191535	0.172047	0.159759	0.20762	0.15773	0.132852	0.175087	0.152857	0.117079	0.139215	0.164873	0.135733	0.141674	0.140665	0.135893	0.100912	0.138375
Atraid	0.851178	0.669729	0.639133	0.758486	0.970515	0.731938	0.934734	0.953409	0.894488	0.911502	0.935926	0.908242	0.937935	0.804292	0.747686	0.632941	0.779715	0.77951	0.786825	0.929054	0.943586
Atrip	0.0281653	0.069711	0.1763	0.0832372	0.0936132	0.0840133	0.10967	0.13365	0.114655	0.0806662	0.0847845	0.122456	0.0815423	0.105947	0.0927153	0.149675	0.0891381	0.102642	0.0903695	0.0324853	0.0719174
Atrn	0.237206	0.207804	0.45273	0.607727	0.513581	0.563207	0.563163	0.596669	0.444813	0.431935	0.482138	0.452436	0.49486	0.438341	0.420382	0.453752	0.343612	0.391158	0.398318	0.200814	0.39099
Atrnl1	0.0281653	0	0.113679	0.32745	0.140166	0.107271	0.114038	0.19185	0.173048	0.130184	0.0579386	0.0664473	0.0357067	0.0781328	0.118917	0.121765	0.118729	0.0664833	0.0698173	0.0469142	0.0565252
Atrx	0.712749	0.385713	0.710775	0.625145	0.770444	0.698745	0.744637	0.691538	0.689416	0.663548	0.744908	0.657479	0.590144	0.881374	0.762177	0.679003	0.739109	0.657285	0.581747	0.722488	0.626571
Atxn1	0.524863	0.385713	0.418092	0.821204	0.53186	0.59509	0.578225	0.362014	0.453264	0.601097	0.509729	0.560914	0.660174	0.853449	0.80672	0.679003	0.804561	0.550413	0.446629	0.380634	0.428889
Atxn10	1.07587	0.364001	0.628652	0.758486	0.684793	0.806781	0.77667	0.775216	0.760076	0.757279	0.743303	0.694681	0.795917	0.829076	0.6803	0.697835	0.617795	0.552158	0.649755	0.685186	0.699818
Atxn1l	0.112439	0.0232537	0.0126579	0.0832372	0.0987975	0.065374	0.0834197	0.072323	0.0403617	0.0511217	0.0600054	0.089395	0.0815423	0.066989	0.0877168	0.0469311	0.0561688	0.0483682	0.0377917	0.0577297	0.0744812
Atxn2	0.384799	0.342124	0.564478	0.625145	0.590144	0.587169	0.57259	0.656835	0.568292	0.558642	0.549557	0.496031	0.481212	0.590736	0.58041	0.55752	0.567407	0.463107	0.452861	0.302237	0.505223
Atxn2l	0.345215	1.00701	0.49813	0.572395	0.545463	0.439031	0.46642	0.515709	0.500571	0.487823	0.454201	0.473191	0.455973	0.473704	0.49073	0.466467	0.53307	0.422776	0.412065	0.373899	0.379034
Atxn3	0.0563083	0	0.063249	0.0832372	0.0676567	0.0840133	0.0856097	0.0776699	0.083753	0.063215	0.0930334	0.0562363	0.0637324	0.117051	0.111438	0.0797277	0.0561688	0.0463544	0.0629595	0.0433078	0.0539584
Atxn7	0.345215	0.275569	0.138794	0.165905	0.0884264	0.181249	0.1402	0.168108	0.136224	0.148844	0.136224	0.145269	0.0993264	0.105947	0.141311	0.16822	0.133488	0.0926095	0.124535	0.0937255	0.0975317
Atxn7l1	0.112439	0.116019	0.287176	0.307625	0.227207	0.254261	0.243733	0.218106	0.257998	0.346967	0.247969	0.285124	0.453665	0.542785	0.330226	0.255429	0.406863	0.29799	0.234946	0.115268	0.219317
Atxn7l2	0.0563083	0	0.0506113	0.103979	0.0520598	0.046712	0.0483328	0.0696488	0.0341548	0.0564975	0.049669	0.0536827	0.0433538	0.072562	0.0501672	0.0844068	0.0446133	0.0423261	0.0332127	0.0324853	0.0385509
Atxn7l3	0.154316	0.0928896	0.406439	0.518166	0.405465	0.489555	0.472348	0.448608	0.533357	0.374747	0.317614	0.365228	0.371498	0.448499	0.387938	0.457998	0.360721	0.292195	0.346949	0.204351	0.308698
Atxn7l3b	2.07052	1.36837	2.40945	2.14404	2.12827	2.07063	2.0899	2.04952	2.18342	2.04146	2.15375	2.0816	2.13595	2.22796	2.00246	2.12942	1.96867	2.10493	2.18762	2.0203	2.15759
AU019823	0.0281653	0.0928896	0.163823	0.124677	0.0884264	0.153601	0.142376	0.141617	0.139301	0.131518	0.0889097	0.140205	0.0967876	0.105947	0.13261	0.126424	0.146582	0.106653	0.115436	0.104503	0.0898533
AU022252	0.126424	0.0464949	0.126247	0.267627	0.124677	0.111916	0.166266	0.165464	0.151593	0.123508	0.142376	0.135138	0.129738	0.18882	0.203117	0.16822	0.117088	0.132675	0.134758	0.111681	0.10776
AU022754	0	0	0.0379656	0	0.00520831	0	0.00659336	0	0.00931664	0.00269179	0.00621114	0.01023	0.0178562	0.011173	0.0012547	0	0.0280955	0	0.00801824	0.0036101	0.00514137
AU040320	0.0563083	0.0232537	0.188751	0.186418	0.252516	0.213331	0.23091	0.183947	0.248973	0.182035	0.181201	0.150328	0.122145	0.166823	0.168585	0.103104	0.125292	0.0966238	0.143833	0.12602	0.0924134
AU041133	0	0.069711	0.0253138	0.0624594	0.0832372	0.0886688	0.0943654	0.0696488	0.0620719	0.0659011	0.0765298	0.104668	0.0739123	0.10039	0.0902163	0.117103	0.0907843	0.080558	0.0960721	0.0685384	0.102647
Auh	0.930304	0.796718	0.607506	0.821204	0.504382	0.778696	0.620873	0.637003	0.525208	0.784969	0.616511	0.574081	0.691105	0.678559	0.542614	0.565602	0.509853	0.534646	0.593419	0.705376	0.691604
Aup1	0.291624	0.470787	0.238246	0.405465	0.30265	0.374371	0.363379	0.399478	0.358717	0.297091	0.311698	0.285124	0.267217	0.381723	0.391433	0.35847	0.352956	0.274756	0.349108	0.193732	0.301332
Aurkaip1	1.68576	1.23908	1.81444	1.90078	1.77473	1.68642	1.70715	1.79704	1.68797	1.6901	1.7361	1.76197	1.72928	1.70872	1.7428	1.71399	1.72392	1.6702	1.69283	1.67959	1.67317
Auts2	1.32415	1.12165	0.934071	1.15959	1.2838	1.09768	1.18558	0.990672	1.05437	0.74898	1.29017	1.70591	0.877761	1.04147	0.681311	0.701576	1.1466	0.902597	1.0931	1.01736	1.30433
Aven	0.0844068	0.069711	0.0758765	0.0208318	0.0572604	0.144358	0.0834197	0.0803425	0.0806579	0.0940738	0.0558715	0.0460196	0.0866263	0.0837011	0.0727088	0.0937593	0.0627687	0.0885937	0.0538114	0.0433078	0.0693531
Avil	0	1.14875	0.0253138	0.0208318	0	0.0186905	0.0175815	0.0294863	0.00931664	0.00807528	0.00621114	0.0179019	0.0153055	0.016759	0.017565	0.023472	0.0165282	0.0181442	0.0183266	0.246591	0.0179939
Avl9	0.209727	0.0232537	0.418092	0.536404	0.481212	0.383085	0.43254	0.508617	0.42498	0.391035	0.424031	0.374795	0.318564	0.407613	0.366871	0.354059	0.316979	0.296059	0.346949	0.15105	0.342858
Avpi1	0.250881	0.0464949	0.418092	0.536404	0.342238	0.426229	0.342703	0.467984	0.308736	0.335526	0.279972	0.223206	0.333092	0.58124	0.546971	0.462236	0.462656	0.364836	0.344789	0.343392	0.338
Avpr1a	0	0	0.0126579	0	0.00520831	0	0.00659336	0.0107237	0.00621114	0.0322959	0.012422	0.01023	0.0178562	0	0.0739602	0	0.00661152	0.0201599	0.00916367	0.0144399	0.00514137
AW146154	0.0563083	0	0.0253138	0.0208318	0.0728522	0.0186905	0.0483328	0.0482387	0.0341548	0.0390211	0.0558715	0.0485742	0.0433538	0.0335133	0.058937	0.023472	0.0347038	0.0282221	0.0332127	0.0144399	0.0179939
AW209491	0.223487	0.116019	0.406439	0.481212	0.443637	0.365631	0.450537	0.416783	0.358717	0.374747	0.317614	0.316919	0.32099	0.302622	0.351559	0.300616	0.360721	0.278638	0.300169	0.179539	0.301332
AW495222	0.014084	0	0.0379656	0	0.0312449	0.0373745	0.0351576	0.0241263	0.0217374	0.0255692	0.0207025	0.00767256	0.0204067	0.0279293	0.0864669	0.0328579	0.0380074	0.0262067	0.0240527	0.0144399	0.0308434
AW549877	0.237206	0.253103	0.250535	0.443637	0.227207	0.208761	0.23305	0.290791	0.179164	0.216343	0.156708	0.230685	0.249941	0.161311	0.28713	0.205131	0.243857	0.186418	0.184518	0.197274	0.20675
AW551984	0.0844068	0.0928896	0.3474	0.443637	1.00459	0.17665	0.934734	1.0235	0.816235	0.769647	1.12077	0.698764	0.628679	0.42814	0.708384	0.39787	0.617795	0.63907	0.473515	0.197274	0.402893
AW554918	0.014084	0	0.0506113	0.103979	0.0728522	0.046712	0.0899884	0.0963655	0.0620719	0.0605283	0.0558715	0.089395	0.0535458	0.0558369	0.0639464	0.0797277	0.0809034	0.0403117	0.0618163	0.0433078	0.046256
Axin1	0	0.069711	0.0758765	0.124677	0.0728522	0.046712	0.0834197	0.0990337	0.0558715	0.0685869	0.0889097	0.0562363	0.040805	0.0558369	0.0601895	0.0750469	0.07596	0.0564217	0.0492355	0.0685384	0.0667884
Axin2	0.16822	0.0464949	0.0884921	0.0416546	0.145321	0.0700362	0.155418	0.168108	0.083753	0.16878	0.0620719	0.0970344	0.0586399	0.0502582	0.131366	0.163589	0.0973667	0.0604471	0.0492355	0.0649363	0.0590916
Axl	0.014084	0	0	0.0208318	0.0156244	0.00934566	0.0131864	0.0107237	0.012422	0.00942113	0.00207039	0.01023	0.00510202	0.011173	0.0100375	0.00938953	0.0165282	0.0100805	0.0068728	0.0036101	0.0205641
AY036118	0	0.320088	0.101094	0.0832372	0.124677	0.0886688	0.114038	0.115028	0.123906	0.0900532	0.0971556	0.112296	0.0917081	0.111501	0.112685	0.112439	0.105589	0.0885937	0.0983522	0.0433078	0.0796074
AY074887	0	0	0	0	0.0624594	0.00934566	0.0087911	0.0053619	0.0217374	0.00807528	0.0103518	0.0127874	0.00765299	0.00558656	0.0100375	0	0.01157	0.00604835	0.0125999	0	0.00257069
Azi2	0.331901	0.207804	0.55357	0.536404	0.655225	0.638059	0.761578	0.725535	0.557608	0.610152	0.632023	0.642791	0.585812	0.503584	0.706394	0.629047	0.605325	0.492005	0.464243	0.326308	0.486953
Azin1	0.305103	0.16208	0.3474	0.625145	0.366725	0.559184	0.40631	0.298497	0.358717	0.329152	0.32745	0.343584	0.465183	0.473704	0.397248	0.380428	0.352956	0.35727	0.328537	0.343392	0.364618
Azin2	0.250881	0.18499	0.138794	0.165905	0.160765	0.162831	0.183582	0.215487	0.185274	0.167453	0.16284	0.190659	0.142376	0.155794	0.188345	0.300616	0.169436	0.152632	0.174373	0.161749	0.143466
B130006D01Rik	0.042241	0.0232537	0.0379656	0.0416546	0.0624594	0.0327045	0.0395501	0.0455606	0.0341548	0.0363312	0.0351894	0.0485742	0.0357067	0.072562	0.0388861	0.023472	0.0347038	0.0503819	0.0320678	0.0288769	0.0308434
B230118H07Rik	0.512482	0.275569	0.45273	0.267627	0.527305	0.464431	0.353059	0.392026	0.481212	0.450306	0.549557	0.450119	0.510676	0.513453	0.372739	0.309585	0.323266	0.402362	0.379165	0.433909	0.342858
B230208H11Rik	0	0	0.0126579	0	0.00520831	0.00467288	0.00439559	0.00268096	0.00931664	0.00134589	0.012422	0.00767256	0.00255102	0.011173	0.0050188	0.014084	0	0.0100805	0.0068728	0	0.00771201
B230209E15Rik	0.799415	0.68849	1.71773	1.13556	1.79849	1.38794	1.57247	1.57465	1.67344	1.58895	1.51187	1.42518	1.66601	1.56425	1.85663	1.71726	1.72962	1.55098	1.37553	1.07603	1.36877
B230217C12Rik	0.39787	0.470787	1.02566	0.866565	0.873989	0.70618	0.84358	0.807471	0.71903	0.741681	0.78451	0.803344	0.765005	0.861483	0.850884	0.716456	0.718408	0.731408	0.828574	0.658866	0.797166
B230217O12Rik	0.0984325	0.16208	0.371166	0.227207	0.371597	0.217898	0.298829	0.331686	0.278976	0.293223	0.235901	0.185633	0.230107	0.291925	0.349196	0.214318	0.280601	0.278638	0.258287	0.0865346	0.236854
B230219D22Rik	1.29581	0.897723	1.29245	1.04759	1.47804	1.14178	1.44068	1.37057	1.38958	1.21365	1.462	1.45841	1.3259	1.3607	1.63387	1.38104	1.36876	1.36426	1.30192	1.38055	1.27672
B230303O12Rik	0.0281653	0	0.0126579	0.0208318	0.0104165	0.0420437	0.015384	0.0214461	0.0310509	0.0188414	0.00414077	0.00511507	0.0153055	0.0279293	0.00752816	0.014084	0.00661152	0.0221756	0.0137453	0	0.0154236
B230307C23Rik	0.0281653	0.16208	0.101094	0.0208318	0.0936132	0.0513793	0.072464	0.130992	0.077562	0.0524658	0.0455329	0.091942	0.0484504	0.0614139	0.0814657	0.0844068	0.084198	0.0564217	0.0526675	0.0469142	0.0565252
B230311B06Rik	0	0	0.0126579	0.103979	0.0208318	0.0140182	0.00439559	0.0053619	0.00621114	0.00672942	0.0103518	0.00511507	0.00255102	0.00558656	0.0100375	0	0.00495866	0.00604835	0.00801824	0.0180496	0.00514137
B230312C02Rik	0.0281653	0.275569	0.371166	0.124677	0.247466	0.065374	0.25439	0.308744	0.218748	0.200537	0.164883	0.130068	0.104402	0.161311	0.35274	0.218905	0.376188	0.313393	0.169858	0.13318	0.398138
B230317F23Rik	0.0703645	0.207804	0.0253138	0.0624594	0.0624594	0.0373745	0.0395501	0.0428823	0.0310509	0.0296054	0.0476011	0.035798	0.0204067	0.0502582	0.0526733	0.023472	0.0313998	0.0403117	0.0343575	0.0397008	0.0179939
B230322F03Rik	0.0281653	0.0464949	0.0379656	0.0416546	0.0364503	0.0420437	0.0263706	0.0509163	0.049669	0.0134585	0.0331202	0.0511286	0.0331572	0.0390962	0.0313625	0.0187782	0.0148755	0.0161283	0.036647	0.0144399	0.0257041
B230323A14Rik	0	0	0	0	0.00520831	0	0.0021978	0	0	0.00538355	0.00207039	0.01023	0.00255102	0	0.00752816	0.00938953	0.00495866	0	0.0068728	0.0036101	0.00257069
B230334C09Rik	0.0281653	0.069711	0.335446	0.32745	0.395832	0.417658	0.460477	0.40938	0.338234	0.27382	0.374227	0.248087	0.195187	0.448499	0.393761	0.300616	0.27901	0.237675	0.271564	0.136757	0.158716
B230354K17Rik	0.042241	0.0928896	0.0884921	0.0624594	0.186418	0.102624	0.151073	0.165464	0.15773	0.131518	0.113627	0.122456	0.137323	0.111501	0.126388	0.140384	0.122011	0.132675	0.121124	0.0901306	0.112871
B230369F24Rik	0.237206	0	0.0884921	0.165905	0.0572604	0.116558	0.0812293	0.085686	0.0899408	0.0954137	0.0971556	0.102124	0.13985	0.117051	0.127633	0.0797277	0.105589	0.106653	0.0880876	0.0613334	0.0898533
B2m	0.140384	0.16208	0.138794	0.124677	0.457799	0.365631	0.359255	0.228568	0.188326	0.189972	0.183238	0.0970344	0.172611	0.371298	0.875149	0.200531	0.37773	0.227862	0.184518	0.236068	0.151095
B3galnt1	0.112439	0.0928896	0.299308	0.366725	0.356955	0.421947	0.468398	0.41185	0.352879	0.330428	0.356772	0.333914	0.291761	0.265042	0.327847	0.331901	0.280601	0.274756	0.29688	0.154618	0.284081
B3galnt2	0.0563083	0.116019	0.126247	0.0208318	0.0260387	0.0420437	0.0307644	0.0294863	0.0248422	0.0511217	0.041396	0.033242	0.056093	0.066989	0.0539262	0.060995	0.0330518	0.0483682	0.0435143	0.0288769	0.0488238
B3galt1	0.237206	0.116019	0.188751	0.186418	0.155621	0.217898	0.138023	0.267573	0.114655	0.222914	0.207615	0.319352	0.056093	0.0948299	0.0764625	0.126424	0.0743118	0.0644715	0.107468	0.0973192	0.0975317
B3galt2	0.112439	0.139086	0.287176	0.247466	0.0728522	0.111916	0.0856097	0.0883568	0.22481	0.0685869	0.160797	0.312047	0.15247	0.161311	0.0852168	0.163589	0.0743118	0.122676	0.100632	0.108093	0.102647
B3galt4	0.0563083	0	0.0126579	0.0416546	0.0260387	0.0373745	0.0329611	0.0482387	0.0403617	0.0430553	0.0351894	0.0383538	0.040805	0.0279293	0.0514202	0.0375499	0.0462645	0.0302373	0.0343575	0.0252681	0.0385509
B3galt5	0	0	0.101094	0.287682	0.211951	0.107271	0.166266	0.115028	0.105395	0.103449	0.0724005	0.0689989	0.038256	0.0892669	0.0614419	0.103104	0.0874916	0.0926095	0.0994921	0.05052	0.105204
B3galt6	0.182091	0.0928896	0.151321	0.103979	0.186418	0.148981	0.205151	0.183947	0.194425	0.208447	0.201532	0.190659	0.210184	0.117051	0.179709	0.177471	0.185708	0.164579	0.146101	0.175985	0.173929
B3gat1	0.154316	0.139086	0.45273	0.536404	0.232281	0.649601	0.281963	0.27791	0.576267	0.54934	0.738478	0.902909	0.217665	0.237971	0.305154	0.345215	0.275828	0.321068	0.29688	0.154618	0.254319
B3gat2	0.0703645	0.0928896	0.916727	0.405465	0.217042	0.144358	0.133668	0.0963655	0.218748	0.0820076	0.295871	1.25358	0.859561	0.366071	0.492964	0.259972	0.496681	0.610548	0.463211	0.183091	0.414742
B3gat3	0.745812	0.407253	1.03368	0.851602	0.949646	1.09487	1.0751	1.10769	1.08299	1.03768	0.982955	0.884986	1.19476	1.12295	1.10037	1.14831	0.987086	1.02856	0.906261	0.931518	0.97111
B3glct	0	0.116019	0.101094	0.145321	0.307625	0.0420437	0.430532	0.487199	0.126988	0.245181	0.0703354	0.132603	0.177636	0.011173	0.0376323	0.0656805	0.042962	0.0725171	0.0560989	0.0829374	0.0642232
B3gnt2	0	0	0.0253138	0.0208318	0.0364503	0.00467288	0.0263706	0.0214461	0.0186325	0.0201871	0.0269119	0.0306857	0.0102039	0.016759	0.0263458	0.023472	0.00991719	0.0201599	0.0229075	0.0144399	0.0205641
B3gnt4	0.0281653	0	0.0253138	0	0.0260387	0.0420437	0.0241735	0.0241263	0.0186325	0.0148043	0.0248422	0.035798	0.0178562	0.016759	0.0213284	0.060995	0.0247908	0.0201599	0.0274879	0.0036101	0.0257041
B3gnt5	0	0	0	0	0	0.00934566	0.0021978	0	0.00931664	0.010767	0.00207039	0	0.00765299	0	0.0163104	0.00469482	0.00495866	0.00201613	0.00229095	0.00722015	0
B3gnt6	0	0	0.0126579	0.0208318	0.00520831	0.00467288	0.0087911	0.0053619	0.012422	0.00269179	0.0103518	0	0.00255102	0	0.00250941	0	0.00991719	0.00403225	0.0103091	0	0.00514137
B3gnt7	0	0	0	0	0.0104165	0.00467288	0.0021978	0.0214461	0.012422	0.00403767	0.0144922	0	0.00510202	0.00558656	0.00627348	0.00469482	0.00826437	0.00201613	0.00572735	0	0.00257069
B3gnt9	0	0.069711	0.0126579	0.0208318	0.00520831	0.046712	0.015384	0.0294863	0	0.0174957	0.0103518	0.0153447	0.0484504	0.0279293	0.0388861	0.014084	0.0924303	0.0483682	0.0240527	0.0252681	0.0282739
B3gntl1	0	0.0232537	0	0.0208318	0.0364503	0.00467288	0.0109888	0.0214461	0.0217374	0.0188414	0.0269119	0.0179019	0.0127548	0.016759	0.0200739	0.00938953	0.0165282	0.0120965	0.0125999	0.0144399	0.00771201
B430010I23Rik	0.126424	0.725388	0.0884921	0.0416546	0.211951	0.0700362	0.133668	0.117691	0.139301	0.140853	0.109512	0.0689989	0.0815423	0.111501	0.113932	0.107772	0.0973667	0.0725171	0.0800976	0.15105	0.10009
B430218F22Rik	0	0.0464949	0.0126579	0	0	0.0140182	0.0109888	0.0134044	0.00310559	0.00942113	0.0103518	0.0127874	0.0127548	0.011173	0.0100375	0.00469482	0.00495866	0.00806443	0.00572735	0.00722015	0
B4galnt1	0.345215	0.275569	0.238246	0.267627	0.227207	0.290298	0.348921	0.351939	0.302805	0.315084	0.297854	0.2257	0.254884	0.254236	0.373911	0.255429	0.275828	0.288327	0.25607	0.264068	0.20675
B4galnt4	0.474904	0.16208	0.335446	0.227207	0.361844	0.245199	0.348921	0.364527	0.305772	0.358364	0.303794	0.285124	0.383395	0.360834	0.399571	0.402213	0.275828	0.292195	0.263825	0.122438	0.289019
B4galt1	0.042241	0.0464949	0.0126579	0	0.0260387	0.0186905	0.0131864	0.0160851	0.00931664	0.0215327	0.0165624	0.00511507	0.0153055	0.011173	0.0138013	0.00938953	0.0198334	0.0100805	0.0114545	0.0108301	0.0128531
B4galt2	0.0984325	0.0232537	0.163823	0.32745	0.307625	0.190436	0.269262	0.264985	0.212679	0.176737	0.215714	0.19568	0.202691	0.248821	0.247162	0.214318	0.247066	0.184436	0.167599	0.104503	0.171396
B4galt3	0.31853	0.230511	0.188751	0.32745	0.337317	0.199606	0.303033	0.324057	0.248973	0.269927	0.225819	0.240638	0.217665	0.237971	0.434161	0.218905	0.338928	0.278638	0.16534	0.143907	0.186576
B4galt4	0.014084	0.0464949	0.063249	0.0624594	0.0832372	0.0886688	0.0856097	0.128334	0.083753	0.0645581	0.125961	0.104668	0.124677	0.105947	0.135097	0.117103	0.0891381	0.0946168	0.0663888	0.0288769	0.0770446
B4galt5	0.154316	0.207804	0.250535	0.347152	0.217042	0.348069	0.338551	0.37956	0.242945	0.330428	0.207615	0.19317	0.27951	0.297278	0.277479	0.31853	0.326405	0.218027	0.270459	0.136757	0.249336
B4galt6	0.799415	0.512193	1.1187	1.03451	1.31551	1.10607	1.18189	1.09808	1.17916	1.01459	1.06206	1.07016	0.973822	1.06234	1.19163	1.07587	1.1098	1.14219	1.0834	0.904163	0.945323
B4galt7	0.0703645	0.116019	0.151321	0.124677	0.186418	0.125836	0.200845	0.236398	0.191376	0.192616	0.175087	0.180602	0.190178	0.221644	0.237412	0.182091	0.193825	0.150639	0.1495	0.0793391	0.186576
B4gat1	0.278092	0.407253	0.520483	0.481212	0.549977	0.417658	0.515346	0.472803	0.453264	0.493816	0.404987	0.379567	0.418774	0.41276	0.375083	0.35847	0.425097	0.355376	0.364176	0.437202	0.410009
B630019K06Rik	1.15908	0.779191	1.2663	1.27303	1.8168	1.33398	1.62954	2.12609	1.58918	2.17506	1.43807	1.28817	1.32209	1.31964	0.966539	1.0816	1.28096	1.18578	1.40719	1.10653	1.42626
B830012L14Rik	0.195927	0.913883	0.441239	0.366725	0.462501	0.276825	0.416431	0.43886	0.358717	0.42208	0.343124	0.341169	0.259822	0.468685	0.46488	0.49586	0.402285	0.359164	0.342627	0.140333	0.291485
B830042I05Rik	0	0	0.0126579	0	0.0156244	0.00934566	0	0.0107237	0.00621114	0	0.00414077	0.0127874	0	0.011173	0.00376411	0.00469482	0.00165289	0.00403225	0.00572735	0	0.00514137
B930025P03Rik	0	0	0	0	0.0260387	0.0140182	0.0087911	0.00268096	0.0310509	0.0309506	0.0248422	0.00255754	0.00510202	0.00558656	0.00376411	0.00469482	0	0.00201613	0.016036	0	0.00771201
B930036N10Rik	0.0844068	0.230511	0.101094	0.0416546	0.247466	0.153601	0.23091	0.149576	0.323519	0.140853	0.148522	0.137672	0.162549	0.139215	0.111438	0.16822	0.188956	0.214087	0.178884	0.111681	0.115425
B930082K07Rik	0	0	0.0253138	0	0.0416546	0.0327045	0.0263706	0.0428823	0.0341548	0.0242237	0.0227724	0.0306857	0.0229572	0.016759	0.0564318	0.042241	0.0165282	0.0362824	0.0251978	0.0108301	0.0205641
B9d1	0.0703645	0.0928896	0.101094	0.124677	0.206855	0.130471	0.258645	0.264985	0.136224	0.158155	0.195441	0.178085	0.124677	0.128141	0.22397	0.205131	0.177578	0.170543	0.166469	0.111681	0.125633
B9d2	0.209727	0.230511	0.188751	0.518166	0.395832	0.30372	0.390035	0.401957	0.433499	0.370975	0.34703	0.213215	0.354757	0.458614	0.456954	0.246328	0.506933	0.508096	0.313292	0.257086	0.276663
Baalc	0.291624	0.230511	0.531572	0.424624	0.65948	0.472837	0.555588	0.467984	0.495057	0.442974	0.592118	0.482355	0.349956	0.392109	0.521794	0.508339	0.654697	0.502746	0.51224	0.236068	0.516564
Babam1	0.524863	0.207804	0.680441	0.742399	0.607727	0.606909	0.617203	0.632565	0.615646	0.53765	0.553139	0.529846	0.568387	0.70095	0.564301	0.57365	0.585758	0.536404	0.552253	0.390706	0.489245
Babam2	0.182091	0.069711	0.262788	0.186418	0.140166	0.213331	0.166266	0.181311	0.120824	0.146181	0.189343	0.203202	0.172611	0.210727	0.269015	0.177471	0.185708	0.186418	0.169858	0.175985	0.125633
Bace1	0.209727	0.230511	0.311399	0.536404	0.317553	0.374371	0.430532	0.354461	0.326468	0.324043	0.307749	0.304725	0.230107	0.329216	0.385605	0.362876	0.30437	0.321068	0.294685	0.257086	0.308698
Bace2	0	0	0	0.0416546	0.00520831	0	0.0087911	0.0053619	0.00931664	0.00403767	0.160797	0.142737	0.00765299	0	0.0050188	0	0.00661152	0.00604835	0.00458189	0.0108301	0.00514137
Bach1	0.0563083	0.0232537	0.0506113	0.0208318	0.0312449	0.046712	0.0527228	0.0535936	0.0372585	0.0417107	0.0289815	0.0409093	0.0357067	0.0335133	0.0301084	0.0281653	0.0561688	0.0322525	0.0343575	0.0180496	0.0488238
Bach2	0.126424	0.0232537	0.0884921	0.0832372	0.0728522	0.102624	0.194378	0.173393	0.145449	0.16878	0.0558715	0.0434646	0.0484504	0.0614139	0.0363784	0.042241	0.0660676	0.0443403	0.0629595	0.0397008	0.0565252
Bad	0.524863	0.512193	1.00947	0.693147	0.885052	0.858054	0.986088	0.987168	0.962409	0.956399	0.847298	0.70487	0.78247	1.05889	1.0003	1.0321	0.923964	0.961691	0.952426	0.799986	0.771923
Bag1	1.5401	1.22659	1.94642	1.82501	1.90685	1.85618	1.80516	1.86812	1.94068	1.77367	1.70596	1.85968	1.83921	1.82724	1.77346	1.83172	1.7549	1.83678	1.88851	1.51098	1.79127
Bag2	0.16822	0.0928896	0.126247	0.0416546	0.140166	0.102624	0.185743	0.154876	0.11157	0.16878	0.105395	0.119917	0.106939	0.0837011	0.0639464	0.0984325	0.0710147	0.0584345	0.127944	0.0649363	0.0949728
Bag3	0.014084	0.0232537	0	0.0832372	0.0364503	0.0560454	0.0175815	0.0428823	0.00931664	0.0174957	0.0227724	0.0127874	0.00765299	0.011173	0.0326166	0.023472	0.061119	0.0221756	0.0263429	0.12602	0.0154236
Bag4	0.474904	0	0.670206	0.65948	0.693147	0.518508	0.655365	0.691538	0.669377	0.54934	0.638874	0.75488	0.611652	0.618937	0.633131	0.545336	0.585758	0.583293	0.575884	0.277994	0.445292
Bag5	0.39787	0.139086	0.45273	0.462501	0.395832	0.339249	0.412387	0.346888	0.329414	0.374747	0.311698	0.294938	0.385769	0.355587	0.364521	0.410877	0.332673	0.284455	0.322012	0.333153	0.362208
Bag6	0.31853	0.342124	0.335446	0.405465	0.307625	0.352469	0.381861	0.387047	0.341169	0.339345	0.315643	0.336334	0.364335	0.339792	0.345648	0.322993	0.34049	0.290262	0.304549	0.243086	0.308698
Bahcc1	0.0703645	0.0232537	0.0379656	0.0624594	0.0520598	0.0373745	0.0746559	0.0830145	0.0527705	0.0672441	0.0662042	0.035798	0.0331572	0.0446779	0.0576844	0.0844068	0.0677168	0.0403117	0.0503796	0.0144399	0.0308434
Bahd1	0.042241	0	0.101094	0.0416546	0.0624594	0.0327045	0.103114	0.0455606	0.0558715	0.0591848	0.0724005	0.0485742	0.0459022	0.066989	0.058937	0.089084	0.0528679	0.0423261	0.0377917	0.0324853	0.0282739
Baiap2	0.690328	0.116019	0.76979	0.227207	0.513581	0.352469	0.653567	0.359498	0.519758	0.387285	0.459815	0.304725	0.142376	0.42814	0.617473	0.470689	0.446203	0.516984	0.478649	0.390706	0.350129
Baiap2l2	0.014084	0	0	0	0.00520831	0	0.0131864	0.0107237	0.00931664	0.00538355	0.0186325	0.00255754	0.00255102	0.00558656	0.017565	0	0.0132228	0.00604835	0.0114545	0	0
Baiap3	0.331901	0.385713	1.15551	0.227207	1.54379	0.447528	1.36001	1.27595	1.20163	1.27522	1.41456	1.39931	0.497126	0.488694	0.914689	0.830691	0.820493	0.887065	0.977577	0.661811	0.825776
Bak1	0.0703645	0.139086	0.101094	0.103979	0.0780457	0.0373745	0.0614997	0.0616232	0.083753	0.0591848	0.078594	0.0562363	0.0637324	0.10039	0.0664505	0.0703645	0.0561688	0.0564217	0.0480914	0.104503	0.0513913
Bambi	0.014084	0	0.0379656	0.0208318	0.140166	0.0373745	0.0483328	0.072323	0.0248422	0.0779828	0.0269119	0.0434646	0.0153055	0.0892669	0.0326166	0.0187782	0.0528679	0.0342675	0.0148906	0.0360932	0.0282739
Banf1	0.371666	0.16208	0.639133	0.443637	0.790169	0.575225	0.801498	0.791429	0.633738	0.669018	0.727162	0.748961	0.515173	0.655867	0.83814	0.636826	0.765876	0.655637	0.585646	0.4989	0.525593
Bank1	0	0	0	0	0	0.00467288	0	0	0	0	0	0.00767256	0	0	0.00250941	0	0.042962	0	0.00114548	0	0
Banp	0.182091	0.364001	0.188751	0.287682	0.222127	0.240661	0.220194	0.264985	0.194425	0.215028	0.219759	0.243122	0.210184	0.265042	0.221521	0.218905	0.200311	0.221963	0.208116	0.158184	0.236854
Bap1	0.140384	0.0464949	0.1763	0.366725	0.332387	0.281321	0.288297	0.285644	0.261002	0.271225	0.260001	0.253045	0.195187	0.18882	0.24229	0.158954	0.214872	0.202247	0.224903	0.136757	0.186576
Bard1	0.0281653	0	0.0253138	0.103979	0.0156244	0.0420437	0.015384	0.0053619	0.0279467	0.0685869	0.0165624	0.0817503	0.0102039	0.00558656	0.0313625	0.0187782	0.00495866	0.00806443	0.0171813	0.00722015	0.0128531
Barhl2	0	0	0	0.0208318	0	0.0186905	0.0087911	0.00268096	0.145449	0.00134589	0.0144922	0	0.00255102	0	0.00250941	0	0.00165289	0.00403225	0.00114548	0	0
Barx2	0	0.0232537	0.163823	0.590144	0.58129	0.181249	0.460477	0.331686	0.22481	0.107465	0.313672	0.109754	0.0484504	0.066989	0.183412	0.0656805	0.143311	0.0483682	0.10519	0.0541252	0.0205641
Basp1	2.04216	1.91667	3.10223	3.01263	3.00391	2.80561	3.0473	2.97692	3.09871	2.9582	2.99368	2.86596	3.15033	3.21534	3.26552	3.12449	3.24141	3.15315	2.83806	2.46349	2.97047
Bax	0.549405	0.864833	0.575327	0.881374	0.625145	0.653432	0.685658	0.7485	0.76721	0.65476	0.666015	0.73107	0.620186	0.632876	0.740877	0.720155	0.615031	0.62738	0.633703	0.676458	0.50067
Baz1b	0.39787	0.470787	0.418092	0.572395	0.545463	0.591134	0.561272	0.583026	0.483988	0.570209	0.491374	0.538771	0.395241	0.537925	0.438737	0.449498	0.397698	0.419077	0.452861	0.329733	0.45694
Baz2a	0.223487	0.116019	0.126247	0.227207	0.211951	0.23157	0.194378	0.225954	0.169988	0.187328	0.201532	0.200696	0.232591	0.20526	0.201888	0.195927	0.169436	0.176502	0.166469	0.136757	0.161254
Baz2b	0.474904	0.385713	0.311399	0.462501	0.217042	0.472837	0.243733	0.231179	0.233887	0.281593	0.348981	0.302281	0.259822	0.20526	0.364521	0.354059	0.205169	0.206197	0.324188	0.260579	0.383822
BB031773	0	0.0464949	0	0	0.00520831	0	0	0.0107237	0.058972	0.00672942	0.00414077	0.01023	0.00255102	0	0.0100375	0.00938953	0	0.00403225	0.00801824	0	0.00257069
Bbc3	0.0281653	0.0232537	0.101094	0.0832372	0.0832372	0.065374	0.116222	0.0963655	0.071368	0.0605283	0.0847845	0.074101	0.0586399	0.0558369	0.123899	0.107772	0.149852	0.0946168	0.0698173	0.122438	0.0744812
Bbip1	0.39787	0.253103	0.382974	0.625145	0.638099	0.400428	0.657162	0.654642	0.541473	0.542334	0.529739	0.563115	0.499391	0.438341	0.747686	0.389163	0.53307	0.550413	0.472486	0.305686	0.433587
Bbof1	0	0.512193	0.163823	0.0416546	0.0624594	0.102624	0.0680793	0.101701	0.0806579	0.0779828	0.11157	0.107211	0.0739123	0.0837011	0.105201	0.107772	0.0907843	0.0664833	0.082381	0.0360932	0.0796074
Bbox1	0	0	0	0	0.00520831	0.00934566	0.0087911	0	0.00621114	0.00538355	0.00207039	0.00255754	0.00510202	0.00558656	0.00752816	0.00938953	0.00826437	0.00806443	0.00343642	0.0036101	0.0102826
Bbs1	0.0563083	0.069711	0.0506113	0.0832372	0.0780457	0.102624	0.144551	0.186583	0.0682699	0.0940738	0.103336	0.102124	0.0535458	0.117051	0.0977114	0.060995	0.0726633	0.0443403	0.0858053	0.0324853	0.046256
Bbs10	0	0	0.0506113	0.0832372	0.0520598	0.0140182	0.0219763	0.032166	0.0186325	0.0269147	0.0269119	0.0306857	0.0331572	0.016759	0.0238371	0.0187782	0.0132228	0.0141124	0.0148906	0.021659	0.0179939
Bbs12	0.0281653	0.0232537	0.0126579	0	0.0520598	0.0233624	0.0241735	0.0214461	0.00621114	0.02826	0.0248422	0.035798	0.0306075	0.0446779	0.0250915	0.00938953	0.0330518	0.0262067	0.029778	0.0036101	0.0308434
Bbs2	0.0984325	0.116019	0.126247	0.0624594	0.0987975	0.0793559	0.0877992	0.117691	0.0651712	0.0980929	0.113627	0.135138	0.071368	0.072562	0.0777135	0.0703645	0.0809034	0.0785482	0.0835226	0.0360932	0.0719174
Bbs4	0.250881	0.069711	0.418092	0.347152	0.386164	0.343663	0.385951	0.372054	0.326468	0.368457	0.341169	0.345996	0.306407	0.302622	0.318311	0.34964	0.370011	0.280578	0.291391	0.183091	0.274187
Bbs5	0.112439	0.0928896	0.0379656	0.0832372	0.0987975	0.0933224	0.133668	0.0990337	0.0961252	0.10211	0.0971556	0.114837	0.038256	0.0948299	0.117671	0.121765	0.0858449	0.0664833	0.0618163	0.0252681	0.0667884
Bbs7	0.042241	0.069711	0.0379656	0	0.0780457	0.065374	0.0899884	0.117691	0.083753	0.0726145	0.0827214	0.0511286	0.0688232	0.066989	0.0626942	0.0375499	0.0693658	0.0423261	0.0400809	0.0360932	0.0513913
Bbs9	0.0281653	0.0232537	0.0758765	0.0208318	0.0572604	0.0560454	0.0790386	0.115028	0.0868473	0.0699295	0.0558715	0.0536827	0.040805	0.0390962	0.0539262	0.0516203	0.0495665	0.0503819	0.0652458	0.0144399	0.0488238
Bbx	0.26451	0.139086	0.238246	0.307625	0.237349	0.254261	0.32606	0.463155	0.261002	0.326599	0.266003	0.525368	0.465183	0.42814	0.272645	0.241769	0.28219	0.268924	0.252742	0.168871	0.254319
BC002059	0.0281653	0	0.063249	0	0.0416546	0.0233624	0.0351576	0.032166	0.0248422	0.0322959	0.0165624	0.033242	0.0204067	0.0614139	0.0351245	0.023472	0.0198334	0.0382971	0.0194719	0.0180496	0.0179939
BC003331	0.140384	0.364001	0.382974	0.307625	0.277668	0.312639	0.309329	0.414318	0.24596	0.279004	0.341169	0.336334	0.301532	0.313286	0.362169	0.237206	0.30279	0.272813	0.251632	0.197274	0.254319
BC003965	0.449498	0.253103	0.65991	0.65948	0.663725	0.579215	0.591308	0.639217	0.626006	0.571362	0.586849	0.580631	0.572758	0.562107	0.651741	0.57365	0.584353	0.555642	0.499069	0.295327	0.507496
BC004004	0.35847	0.16208	0.335446	0.347152	0.352057	0.343663	0.392075	0.41185	0.361631	0.339345	0.364543	0.355628	0.318564	0.402455	0.416925	0.322993	0.37773	0.336363	0.313292	0.350199	0.274187
BC005537	0.621235	0.707042	0.863358	0.726148	0.746436	0.923683	0.77667	0.858441	0.691904	0.745856	0.806248	0.694681	0.778606	0.820861	0.880486	0.84097	0.727497	0.721927	0.566073	0.693869	0.662537
BC005561	0.16822	0.897723	0.3474	0.590144	0.513581	0.404746	0.493953	0.406908	0.433499	0.447865	0.496897	0.360432	0.34274	0.381723	0.504099	0.470689	0.477513	0.299919	0.405729	0.295327	0.335569
BC005624	0.723846	0.743527	0.798481	0.910532	0.942617	0.799809	0.91667	0.94257	0.876975	0.853504	0.951321	0.99418	0.86322	0.995063	0.915555	0.891298	0.848266	0.823184	0.87813	0.802682	0.8163
BC017158	0.014084	0.0464949	0.063249	0.0416546	0.0520598	0.0793559	0.0899884	0.072323	0.0868473	0.076641	0.0662042	0.0842991	0.040805	0.066989	0.0539262	0.089084	0.061119	0.0584345	0.0641027	0.0288769	0.0616576
BC017643	0.0281653	0.207804	0.063249	0.124677	0.103979	0.111916	0.118404	0.0883568	0.099216	0.0954137	0.0930334	0.0689989	0.0764561	0.117051	0.0977114	0.0563083	0.07596	0.0825674	0.0937914	0.0577297	0.0744812
BC022687	0.0563083	0	0.063249	0.124677	0.124677	0.0607104	0.118404	0.128334	0.071368	0.0980929	0.11774	0.122456	0.0484504	0.0502582	0.105201	0.0844068	0.0874916	0.0604471	0.0686745	0.0180496	0.0693531
BC024063	0	0	0	0.0208318	0	0.00934566	0.00659336	0.0107237	0.012422	0.00807528	0.00621114	0.00767256	0.00510202	0	0.00878282	0	0.01157	0.00201613	0.00458189	0.00722015	0.00257069
BC024139	0	0	0.0253138	0	0.0624594	0.00467288	0.0373539	0.0294863	0.0310509	0.0148043	0.0269119	0.0460196	0.00510202	0	0.0238371	0.0328579	0.0495665	0.00403225	0.016036	0.0180496	0.00771201
BC024978	0.014084	0	0	0.0832372	0.0728522	0.0513793	0.0812293	0.0535936	0.046567	0.0739568	0.0827214	0.0817503	0.0942482	0.0837011	0.0827162	0.042241	0.0710147	0.0503819	0.0526675	0.0252681	0.0436879
BC025920	0.112439	0.069711	0.0126579	0	0.0312449	0.0373745	0.0483328	0.0428823	0.0403617	0.0457445	0.0517368	0.033242	0.0331572	0.0502582	0.0326166	0.0469311	0.0231384	0.0443403	0.0389363	0.0180496	0.0205641
BC028471	0	0	0.0253138	0	0.0104165	0	0.00439559	0.0053619	0.00310559	0.00269179	0.012422	0.00511507	0.0102039	0.00558656	0.0050188	0.00469482	0.00991719	0.00403225	0	0	0.00257069
BC028528	0	0.069711	0.0253138	0.103979	0.0156244	0.0140182	0.0087911	0.0134044	0.0186325	0.010767	0.00621114	0.00255754	0.0153055	0.00558656	0.0288542	0.00469482	0.00826437	0.00403225	0.00572735	0.0144399	0.00771201
BC029722	0.690328	0.592607	1.36145	1.17143	1.22331	1.0864	1.18681	1.40584	1.04662	1.15337	1.28273	1.55042	1.09452	1.17129	1.49838	1.33575	1.431	1.18691	1.23935	1.03114	1.10987
BC030343	0	0.0464949	0.0379656	0	0.0104165	0.0280337	0.0263706	0.0187657	0.0155273	0.0148043	0.0165624	0.0127874	0.0102039	0.016759	0.0238371	0.023472	0.0280955	0.0262067	0.00916367	0.0108301	0.0179939
BC030499	0.014084	0	0.371166	0.0624594	0.114334	0.23157	0.0614997	0.0268064	0.126988	0.0726145	0.0703354	0.0255727	0.132267	0.334509	0.273854	0.158954	0.125292	0.345884	0.167599	0.0360932	0.0872927
BC030500	0.0281653	0.139086	0.225921	0.227207	0.155621	0.421947	0.213753	0.34436	0.444813	0.41961	0.183238	0.130068	0.325836	0.448499	0.619569	0.512482	0.489328	0.602073	0.185644	0.147479	0.196673
BC031181	1.60183	1.32301	1.40329	1.61583	1.51796	1.67634	1.51039	1.67524	1.45881	1.58207	1.66893	1.66653	1.61257	1.5908	1.72344	1.53431	1.6676	1.58243	1.48536	1.66913	1.58686
BC034090	0.014084	0	0.0379656	0	0.0260387	0.0233624	0.0109888	0.00804281	0.012422	0.00672942	0.00414077	0.00511507	0	0.011173	0.00627348	0.0281653	0.00991719	0.00403225	0.0148906	0.0144399	0.0205641
BC035947	0	0	0.151321	0.0416546	0.0780457	0.046712	0.0483328	0.0509163	0.0744653	0.0578412	0.0372585	0.033242	0.0637324	0.0892669	0.045154	0.0984325	0.0594691	0.0624594	0.082381	0.0252681	0.0565252
BC037034	0.250881	0.116019	0.311399	0.267627	0.242411	0.308183	0.262895	0.28049	0.239927	0.26343	0.264003	0.245605	0.165066	0.286565	0.289539	0.26451	0.258276	0.216057	0.215958	0.172429	0.226841
BC039966	0.042241	0.16208	0.323445	0.307625	0.0520598	0.181249	0.0395501	0.0428823	0.396371	0.0497776	0.181201	0.348407	0.316136	0.345067	0.199428	0.354059	0.30437	0.18047	0.270459	0.0649363	0.133281
BC048403	0	0	0	0.0208318	0.0260387	0.0280337	0.0285675	0.0214461	0.0279467	0.0242237	0.0186325	0.035798	0.0255074	0.016759	0.0363784	0.0281653	0.0198334	0.0100805	0.0137453	0.0180496	0.0257041
BC049352	0	0.0232537	0.151321	0.145321	0.0260387	0.116558	0.0197789	0.0187657	0.0527705	0.0201871	0.0269119	0.0127874	0.00255102	0.0390962	0.0301084	0.0563083	0.00826437	0.00806443	0.0332127	0.021659	0.0179939
BC049715	0.014084	0.0464949	0.0379656	0	0.0208318	0.0280337	0.0461375	0.0348455	0.0341548	0.0228782	0.0289815	0.0434646	0.0229572	0.016759	0.0163104	0.0469311	0.0280955	0.0262067	0.0320678	0.0144399	0.0257041
BC051077	0	0	0.0253138	0.0208318	0.0208318	0.00934566	0.0175815	0.00804281	0.0217374	0.0121128	0.0227724	0.00255754	0.0204067	0	0.017565	0.00938953	0.00661152	0.0100805	0.0068728	0	0.0102826
BC051142	0.042241	0.116019	0.0126579	0	0.0468579	0.0140182	0.0307644	0.0348455	0.049669	0.033641	0.0331202	0.0230159	0.0280575	0.0279293	0.0225828	0.014084	0.0231384	0.0221756	0.0217623	0.0288769	0.0257041
BC051226	0.331901	0.0464949	0.238246	0.424624	0.262597	0.148981	0.215901	0.275329	0.269999	0.225539	0.323519	0.350816	0.142376	0.117051	0.271435	0.228065	0.205169	0.168556	0.191271	0.118854	0.171396
BC052040	0.0563083	0.0232537	0.126247	0.0416546	0.0728522	0.0933224	0.122768	0.0830145	0.0310509	0.0900532	0.0641382	0.074101	0.0484504	0.0781328	0.0514202	0.0375499	0.0495665	0.0584345	0.0263429	0.0469142	0.0334128
BC055324	0	0	0	0	0.00520831	0.00467288	0.0021978	0	0.00310559	0.00672942	0.00207039	0.00511507	0.00510202	0.016759	0.00627348	0.014084	0.00165289	0.00806443	0.00916367	0	0.00771201
BC067074	0	0	0.0253138	0	0.0260387	0.00467288	0.0307644	0.0294863	0.00310559	0.0134585	0.012422	0.01023	0.00765299	0.011173	0.00627348	0.014084	0.0132228	0.00604835	0.0068728	0.00722015	0.0154236
Bc1	3.32845	2.99822	3.98322	3.73128	3.86249	3.734	3.91986	3.78799	3.88703	3.79589	3.85407	3.74273	3.7053	3.76239	3.73937	3.78577	3.74098	3.81144	3.8549	3.07729	3.67541
Bcam	0.0563083	0.364001	0.0506113	0.0416546	0.0260387	0.0700362	0.0856097	0.0749967	0.0651712	0.0618717	0.0310509	0.0204589	0.119613	0.323915	0.0827162	0.089084	0.162915	0.114668	0.0377917	0.22552	0.0565252
Bcan	0.524863	0.491588	0.126247	0.267627	0.17104	0.317089	0.142376	0.197113	0.188326	0.16878	0.13212	0.124994	0.235074	0.232536	0.146278	0.191319	0.193825	0.106653	0.130216	0.183091	0.201714
Bcap29	0.126424	0	0.3474	0.347152	0.443637	0.276825	0.530769	0.4413	0.447633	0.43562	0.370357	0.270352	0.340331	0.397287	0.452413	0.336345	0.376188	0.340175	0.345869	0.239579	0.367025
Bcap31	0.549405	0.491588	0.394732	0.774409	0.527305	0.477028	0.509532	0.532165	0.427823	0.43562	0.406898	0.405662	0.526374	0.51837	0.446724	0.406548	0.446203	0.44669	0.393012	0.508488	0.376636
Bcar1	0.0844068	0.18499	0.225921	0.124677	0.242411	0.217898	0.243733	0.290791	0.233887	0.228163	0.264003	0.185633	0.210184	0.221644	0.204347	0.214318	0.184083	0.130676	0.185644	0.161749	0.184049
Bcar3	0.0281653	0.069711	0.113679	0.0624594	0.0676567	0.0327045	0.0899884	0.0830145	0.0620719	0.0417107	0.0476011	0.0230159	0.0306075	0.016759	0.206804	0.0750469	0.102301	0.0624594	0.0274879	0.0397008	0.0411195
Bcas1	0.0563083	0.0464949	0.0506113	0.0208318	0.0416546	0.0607104	0.0395501	0.066974	0.058972	0.0524658	0.0579386	0.0460196	0.0357067	0.072562	0.0413934	0.0844068	0.0627687	0.0403117	0.0469472	0.0649363	0.0565252
Bcas2	1.39208	0.913883	1.18418	1.21766	1.28111	1.25047	1.19659	1.26619	1.31428	1.22971	1.37688	1.37647	1.39109	1.22385	1.36461	1.25939	1.23488	1.24406	1.26538	1.36334	1.29389
Bcas3	0.250881	0.342124	0.225921	0.405465	0.312593	0.383085	0.342703	0.372054	0.364543	0.326599	0.311698	0.282666	0.318564	0.397287	0.317117	0.322993	0.285367	0.301847	0.267143	0.18664	0.271709
Bcat1	0.182091	0.342124	0.509336	0.642396	0.585722	0.68753	0.379813	0.596669	0.472863	0.596553	0.461684	0.38195	0.670547	0.60489	0.46601	0.524863	0.493743	0.379908	0.477623	0.353596	0.426537
Bcat2	0.014084	0.0464949	0.0506113	0.0416546	0.0312449	0.0327045	0.0461375	0.0589471	0.0341548	0.0322959	0.0538043	0.0383538	0.056093	0.0279293	0.0702058	0.0375499	0.0528679	0.0483682	0.0240527	0.0397008	0.035982
Bccip	0.223487	0.275569	0.542601	0.554481	0.536404	0.551114	0.472348	0.448608	0.578918	0.450306	0.489529	0.436166	0.530838	0.609584	0.554571	0.589646	0.462656	0.488413	0.42364	0.469882	0.342858
Bcdin3d	0.0844068	0.0928896	0.0758765	0.0832372	0.160765	0.125836	0.135846	0.101701	0.142376	0.10211	0.0868473	0.0766513	0.0942482	0.139215	0.154962	0.107772	0.113804	0.0644715	0.10405	0.13318	0.110316
Bche	0	0	0	0	0	0.00467288	0.0021978	0.00268096	0.00621114	0.00134589	0.00207039	0.00255754	0.00510202	0	0	0.00469482	0.00165289	0.00806443	0.00458189	0.0108301	0.0102826
Bckdha	0.0844068	0.116019	0.188751	0.186418	0.129843	0.135103	0.151073	0.115028	0.130068	0.150175	0.144425	0.152857	0.119613	0.117051	0.128878	0.16822	0.148217	0.124677	0.112022	0.172429	0.0949728
Bckdhb	0.0844068	0.116019	0.1763	0.186418	0.176171	0.190436	0.12713	0.130992	0.105395	0.118164	0.130068	0.127531	0.112011	0.221644	0.172296	0.117103	0.185708	0.154625	0.131352	0.122438	0.151095
Bckdk	0.278092	0.116019	0.126247	0.247466	0.186418	0.148981	0.243733	0.252016	0.242945	0.225539	0.144425	0.150328	0.162549	0.194306	0.201888	0.0797277	0.167806	0.204223	0.141566	0.154618	0.194151
Bcl10	0.182091	0.16208	0.201172	0.165905	0.237349	0.102624	0.166266	0.168108	0.163862	0.175411	0.213691	0.155384	0.137323	0.122598	0.243509	0.126424	0.182457	0.182454	0.148367	0.104503	0.120531
Bcl11a	0.0703645	0.116019	0.359307	0.851602	0.114334	0.153601	0.0899884	0.0375247	0.197472	0.16878	0.759281	1.33569	0.364335	0.740501	1.17405	0.891298	0.138401	0.595266	0.768573	0.100912	0.289019
Bcl11b	0.042241	0.069711	0.371166	0.554481	0.0416546	0.0793559	0.57259	0.424164	0.102306	0.492619	0.404987	0.280206	0.0535458	0.155794	0.0376323	0.0187782	0.0231384	0.0483682	0.285895	0.0541252	0.161254
Bcl2	0.223487	0.470787	0.323445	0.405465	0.247466	0.356863	0.237326	0.257208	0.264003	0.26343	0.269999	0.245605	0.308842	0.853449	0.683332	0.27357	0.235825	0.612238	0.351265	0.274517	0.347707
Bcl2a1b	0	0.0232537	0	0.0208318	0.00520831	0.0186905	0.00659336	0.0053619	0.00310559	0	0.00621114	0	0.0102039	0	0.00250941	0	0.00165289	0.00604835	0.00458189	0	0
Bcl2l1	0.345215	0.0928896	0.531572	0.366725	0.513581	0.551114	0.563163	0.623657	0.536066	0.532955	0.522485	0.440826	0.587979	0.542785	0.532779	0.470689	0.46861	0.415372	0.414174	0.410736	0.435932
Bcl2l11	0	0.0464949	0.0379656	0	0.00520831	0.0140182	0.0131864	0	0.0186325	0.02826	0.0144922	0.0127874	0.00765299	0	0.00250941	0	0.00826437	0	0.0125999	0.021659	0.0102826
Bcl2l12	0.014084	0.0232537	0.0253138	0.0208318	0	0.00467288	0.0109888	0	0.00621114	0.00538355	0.00621114	0.00511507	0.0102039	0.00558656	0.00878282	0	0	0.0100805	0.00572735	0	0.00514137
Bcl2l13	0.042241	0.0464949	0.0379656	0.145321	0.114334	0.0840133	0.0987406	0.115028	0.108483	0.107465	0.0909718	0.0970344	0.0688232	0.0446779	0.108944	0.0937593	0.100656	0.0624594	0.0618163	0.0685384	0.0667884
Bcl2l15	0	0.069711	0	0.0208318	0	0.0140182	0.0021978	0.00268096	0.00310559	0.00672942	0.0103518	0.00511507	0.00765299	0.00558656	0.00376411	0.00469482	0.00661152	0.00403225	0.00229095	0.0433078	0.00771201
Bcl2l2	0.26451	0.0928896	0.1763	0.481212	0.272651	0.396103	0.31352	0.351939	0.248973	0.243874	0.201532	0.218213	0.262288	0.291925	0.282308	0.282608	0.210023	0.162589	0.202508	0.175985	0.264266
Bcl3	0	0	0.0253138	0	0.00520831	0.0233624	0.00439559	0.0294863	0.0186325	0.01615	0.00828148	0.00511507	0.0357067	0.0390962	0.0125467	0.0187782	0.0165282	0.0201599	0.0137453	0	0.0385509
Bcl6	0.014084	0.0232537	0.0253138	0.0208318	0.114334	0.0280337	0.111855	0.144271	0.0279467	0.0739568	0.0351894	0.0817503	0.0255074	0.00558656	0.048914	0.0516203	0.0198334	0.0664833	0.0148906	0.0252681	0.0488238
Bcl7a	0.26451	0.16208	0.464165	0.693147	0.400653	0.460217	0.51728	0.382058	0.430663	0.475788	0.469143	0.408021	0.44441	0.448499	0.470525	0.479111	0.409911	0.409804	0.428884	0.383995	0.400517
Bcl7b	0.35847	0.253103	0.475544	0.607727	0.540939	0.510276	0.549888	0.623657	0.533357	0.503371	0.509729	0.480068	0.559616	0.542785	0.540433	0.376051	0.431146	0.499172	0.42364	0.380634	0.407639
Bcl7c	0.182091	0.0464949	0.213563	0.287682	0.287682	0.317089	0.32606	0.306185	0.272994	0.253012	0.323519	0.218213	0.267217	0.313286	0.331415	0.296123	0.266264	0.25333	0.233831	0.221999	0.186576
Bcl9	0.35847	0.069711	0.628652	0.709731	0.499768	0.481212	0.398185	0.614705	0.565627	0.529427	0.609574	0.54544	0.451355	0.438341	0.627927	0.516617	0.724905	0.394898	0.432025	0.18664	0.364618
Bcl9l	0.195927	0	0.126247	0.124677	0.201753	0.153601	0.19869	0.202369	0.200517	0.179386	0.13212	0.19568	0.106939	0.117051	0.164873	0.163589	0.151486	0.132675	0.106329	0.0469142	0.10776
Bclaf1	1.01417	0.945646	1.09608	0.881374	1.10173	1.00757	1.00892	0.997652	1.02509	1.02832	1.04013	1.07642	1.02021	0.980447	1.05443	0.989866	0.950903	1.026	0.924443	1.03342	1.02777
Bclaf3	0.0703645	0.139086	0.0884921	0.124677	0.114334	0.0840133	0.138023	0.125674	0.136224	0.107465	0.121851	0.124994	0.104402	0.105947	0.125144	0.0844068	0.13021	0.0544086	0.0892286	0.0973192	0.0744812
Bcor	0.112439	0.253103	0.250535	0.186418	0.109158	0.181249	0.177095	0.168108	0.236908	0.186005	0.217737	0.203202	0.222646	0.376516	0.308748	0.287119	0.266264	0.23179	0.253851	0.200814	0.204233
Bcorl1	0.042241	0	0.163823	0.206855	0.114334	0.097974	0.174931	0.123014	0.102306	0.0806662	0.125961	0.089395	0.104402	0.105947	0.100209	0.060995	0.122011	0.0885937	0.10519	0.0469142	0.10009
Bcr	0.112439	0.207804	0.262788	0.32745	0.419848	0.227017	0.408338	0.470395	0.332357	0.344428	0.406898	0.443153	0.29665	0.350332	0.435306	0.31853	0.343612	0.274756	0.253851	0.147479	0.239353
Bcs1l	0.16822	0.385713	0.394732	0.145321	0.237349	0.23157	0.25439	0.311302	0.278976	0.236026	0.241939	0.208211	0.170097	0.254236	0.28472	0.223487	0.26786	0.23179	0.218196	0.161749	0.216807
Bdh1	0.278092	0.230511	0.0884921	0.247466	0.0936132	0.217898	0.172766	0.199742	0.160797	0.156826	0.146474	0.168006	0.175124	0.17233	0.182178	0.140384	0.185708	0.142661	0.164209	0.197274	0.128183
Bdh2	0	0	0	0	0.00520831	0.00934566	0.00439559	0.0134044	0.00310559	0.00538355	0.00621114	0.01023	0.00255102	0.00558656	0.00752816	0	0.00495866	0.00604835	0.0068728	0.00722015	0.00257069
Bdnf	0.39787	0.0232537	0.542601	0.145321	0.352057	0.217898	0.604301	0.329145	0.332357	0.331703	0.343124	0.292487	0.0891675	0.334509	0.922464	0.402213	0.151486	0.243553	0.493982	0.200814	0.123082
Bdp1	0.16822	0.16208	0.238246	0.386164	0.337317	0.254261	0.281963	0.331686	0.302805	0.325321	0.295871	0.257998	0.217665	0.275819	0.288334	0.255429	0.307526	0.22393	0.254961	0.197274	0.199194
Bean1	0.0984325	0.207804	0.151321	0.124677	0.227207	0.281321	0.174931	0.157525	0.212679	0.2216	0.500571	0.19317	0.137323	0.144745	0.188345	0.218905	0.264668	0.166567	0.151765	0.122438	0.191627
Becn1	0.436692	0.18499	0.760106	0.572395	0.594555	0.526708	0.648159	0.614705	0.586849	0.504562	0.536968	0.62798	0.512925	0.736154	0.66506	0.659959	0.658749	0.571244	0.53734	0.363765	0.421826
Begain	0.014084	0.18499	0.429693	0.518166	0.513581	0.378731	0.51341	0.596669	0.481212	0.588574	0.483988	0.587159	0.369112	0.448499	0.699409	0.640703	0.588566	0.481212	0.471458	0.140333	0.352549
Bend3	0	0	0	0.0208318	0.0416546	0.00467288	0.0109888	0.0160851	0.00931664	0.01615	0.00621114	0.00511507	0.00510202	0.011173	0.00878282	0.014084	0.00826437	0.00806443	0.00572735	0.00722015	0.0128531
Bend4	0.0281653	0.116019	0.0758765	0.124677	0.140166	0.107271	0.144551	0.154876	0.142376	0.162142	0.142376	0.114837	0.112011	0.10039	0.121408	0.0937593	0.102301	0.0946168	0.102911	0.0288769	0.105204
Bend5	0	0.139086	0.113679	0.227207	0.109158	0.107271	0.144551	0.249417	0.139301	0.156826	0.136224	0.0792011	0.220156	0.275819	0.196967	0.154316	0.084198	0.0845766	0.130216	0.0757398	0.10009
Bend6	1.1671	1.12165	2.01827	1.17143	1.38384	1.56055	1.41678	1.29387	1.7526	1.41683	1.27632	1.21097	1.31061	1.78434	1.36401	1.5742	1.51451	1.55587	1.69974	1.25813	1.59891
Bend7	0.042241	0.139086	0.0379656	0.0416546	0.103979	0.065374	0.0965532	0.130992	0.133147	0.0967534	0.0950947	0.0409093	0.0739123	0.111501	0.0702058	0.0703645	0.0660676	0.0644715	0.119987	0.0469142	0.102647
Best1	0	0	0.0884921	0	0.0312449	0.0560454	0.0175815	0.0348455	0.0527705	0.0296054	0.0186325	0.0204589	0.0509983	0.0502582	0.0263458	0.0844068	0.061119	0.0322525	0.036647	0.0108301	0.0231342
Bet1	0.16822	0.0464949	0.151321	0.124677	0.30265	0.249733	0.319796	0.433971	0.200517	0.298379	0.233887	0.160436	0.182656	0.20526	0.301557	0.154316	0.283779	0.23179	0.185644	0.136757	0.191627
Bet1l	0.423818	0.572809	0.464165	0.642396	0.490509	0.526708	0.507591	0.484806	0.475649	0.463689	0.457945	0.477778	0.392876	0.566908	0.554571	0.524863	0.471582	0.459468	0.47557	0.319449	0.445292
Bex1	2.50329	1.54305	2.25893	2.14885	2.37867	2.25978	2.35796	2.32446	2.2884	2.45092	2.42605	2.41856	2.5743	2.44093	2.53182	2.41484	2.53851	2.42252	2.32959	2.21365	2.45477
Bex2	3.51809	2.85149	3.40231	3.39396	3.63992	3.3513	3.62068	3.65629	3.56235	3.61733	3.64392	3.62747	3.6298	3.5787	3.82436	3.63729	3.70774	3.69302	3.50333	3.45562	3.46719
Bex3	2.79893	2.16554	2.69645	2.41349	2.9472	2.58001	2.79431	2.72427	2.76913	2.72458	2.93378	2.90579	2.64123	2.6559	2.95498	2.78748	2.82686	2.83075	2.7938	2.62557	2.69964
Bex4	1.17507	0.449795	0.993084	0.836482	1.25119	0.936445	1.16452	0.744349	1.1165	1.09078	1.25249	1.25763	1.22825	0.995063	1.46366	1.09861	1.322	1.27477	1.03736	1.1363	1.09758
Bfar	0.182091	0.230511	0.3474	0.247466	0.448367	0.352469	0.430532	0.43886	0.326468	0.407225	0.366482	0.419787	0.385769	0.371298	0.406527	0.406548	0.351401	0.319151	0.32745	0.246591	0.316049
Bfsp1	0	0	0.0126579	0.0208318	0.0156244	0.00934566	0.0197789	0.0214461	0.0310509	0.0215327	0.0144922	0.0127874	0.0102039	0	0.00878282	0.023472	0.0264432	0.0100805	0.0125999	0.0108301	0.0128531
Bfsp2	0.0281653	0	0.0758765	0	0.00520831	0.065374	0.0373539	0.032166	0.0217374	0.0255692	0.0331202	0.0995796	0.0306075	0.0223445	0.0163104	0.0375499	0.0347038	0.0181442	0.0251978	0.0469142	0.0513913
Bhlha9	0	0	0.0884921	0	0.0156244	0.0280337	0.0109888	0.0187657	0.00931664	0.010767	0.0103518	0.0179019	0.0331572	0.0223445	0.0288542	0.0656805	0.039659	0.0221756	0.0240527	0.021659	0.0231342
Bhlhb9	0.250881	0.069711	0.323445	0.247466	0.287682	0.254261	0.311425	0.27791	0.236908	0.234716	0.315643	0.243122	0.240035	0.254236	0.312337	0.26451	0.307526	0.235714	0.195769	0.179539	0.209266
Bhlhe22	0.632941	0	0.262788	0	0	0.0280337	0.0021978	0.00804281	0.0155273	0.00538355	0.00414077	0.0511286	0.00255102	0	0.00250941	0.00469482	0.00991719	0.0100805	0.0446587	0.73942	0.32094
Bhlhe40	0.0281653	0.16208	0.299308	0.366725	0.155621	0.352469	0.281963	0.120353	0.108483	0.205812	0.152616	0.155384	0.0840846	0.161311	0.201888	0.269043	0.113804	0.138668	0.117712	0.253591	0.10009
Bhlhe41	0.524863	0.16208	0.55357	0.821204	0.462501	0.638059	0.676804	0.721323	0.618241	0.607892	0.495057	0.412734	0.411737	0.787539	0.678276	0.605508	0.608103	0.576417	0.526333	0.443774	0.556885
Bicc1	0	0.069711	0.0506113	0.0208318	0.114334	0.0140182	0.138023	0.136307	0.0899408	0.0712721	0.0703354	0.0536827	0.0306075	0.0335133	0.0889667	0.0703645	0.140038	0.0604471	0.0320678	0.021659	0.0436879
Bicd1	0.537171	1.28778	0.690614	0.693147	0.847837	0.827506	0.841983	0.727636	0.841288	0.771699	0.654192	0.678247	0.751284	0.804292	0.7183	0.753067	0.769662	0.567787	0.727831	0.508488	0.722196
Bicd2	0.112439	0.428616	0.101094	0.227207	0.176171	0.195023	0.174931	0.178672	0.191376	0.199218	0.150569	0.157911	0.165066	0.144745	0.187112	0.140384	0.185708	0.150639	0.141566	0.100912	0.140921
Bicdl1	0.0703645	0.275569	0.213563	0.227207	0.160765	0.125836	0.155418	0.173393	0.130068	0.148844	0.150569	0.124994	0.109475	0.128141	0.113932	0.145031	0.123652	0.0483682	0.11316	0.0829374	0.140921
Bicra	0.0563083	0.139086	0.0253138	0	0.0312449	0.0327045	0.0527228	0.0642988	0.0682699	0.0430553	0.049669	0.0562363	0.0357067	0.0279293	0.0664505	0.0516203	0.0380074	0.0423261	0.028633	0.0397008	0.046256
Bicral	0.112439	0.0464949	0.188751	0.307625	0.277668	0.208761	0.262895	0.336762	0.242945	0.247793	0.215714	0.183118	0.217665	0.210727	0.221521	0.354059	0.222942	0.194339	0.227137	0.154618	0.204233
Bid	0.0281653	0	0.113679	0.0416546	0.0728522	0.097974	0.1053	0.141617	0.083753	0.0752989	0.0827214	0.0970344	0.104402	0.0892669	0.105201	0.0797277	0.0990117	0.116671	0.0858053	0.0649363	0.0924134
Bin1	0.712749	0.779191	0.779414	0.676397	0.762482	0.739223	0.830759	0.767044	0.839028	0.69503	0.765627	0.812854	0.881374	0.795939	0.784137	0.917424	1.22061	0.764155	0.746561	0.977512	0.787506
Bin2	0	0	0	0	0.00520831	0.0233624	0.0087911	0.00268096	0.00621114	0.00807528	0.00207039	0.00255754	0.0127548	0	0.00752816	0	0.00661152	0.00604835	0.00114548	0.021659	0.0102826
Bin3	0.042241	0.0464949	0.0126579	0.0208318	0.0208318	0.0327045	0.0527228	0.0375247	0.0310509	0.0363312	0.0331202	0.033242	0.0229572	0.0558369	0.0539262	0.0469311	0.0347038	0.0201599	0.0183266	0.0433078	0.0411195
Birc2	0.195927	0.275569	0.225921	0.366725	0.322505	0.33483	0.296725	0.308744	0.332357	0.259526	0.283953	0.245605	0.242514	0.254236	0.273854	0.250881	0.240646	0.25333	0.231601	0.197274	0.251829
Birc5	0.0281653	0.0464949	0.0126579	0	0.0364503	0.0186905	0.0527228	0.0214461	0.0527705	0.0296054	0.0269119	0.035798	0.038256	0.016759	0.0376323	0.0375499	0.0313998	0.0302373	0.0423699	0.00722015	0.0411195
Birc6	0.462236	0.470787	0.607506	0.758486	0.655225	0.735585	0.72061	0.738102	0.674409	0.662452	0.655886	0.684429	0.664331	0.824974	0.747686	0.697835	0.759544	0.777982	0.676802	0.558894	0.664629
Bivm	0.0563083	0.069711	0.063249	0.0624594	0.103979	0.102624	0.0658864	0.0830145	0.0899408	0.0645581	0.107454	0.0842991	0.0840846	0.0948299	0.0914659	0.0563083	0.0924303	0.0885937	0.0743873	0.0469142	0.0436879
Blcap	1.35862	0.864833	1.21909	1.08605	1.38874	1.02848	1.41072	1.36544	1.65756	1.65296	1.38569	1.39454	1.31189	1.40293	1.51324	1.42458	1.39761	1.40605	1.22952	1.14676	1.33384
Blm	0.014084	0	0.0126579	0	0.0520598	0.00934566	0.0241735	0.0268064	0.0248422	0.0201871	0.0207025	0.0127874	0.0229572	0.0223445	0.0301084	0.0328579	0.0280955	0.0302373	0.0263429	0.0180496	0.0282739
Blmh	0.410877	0.320088	0.299308	0.443637	0.499768	0.374371	0.41845	0.463155	0.390612	0.466114	0.444813	0.482355	0.455973	0.51837	0.468269	0.340783	0.385427	0.44669	0.372751	0.253591	0.32094
Bloc1s1	0.920655	0.207804	0.542601	0.518166	0.453088	0.575225	0.424498	0.513347	0.514294	0.479405	0.535163	0.558711	0.458279	0.51837	0.495196	0.508339	0.478993	0.444859	0.473515	0.48605	0.491535
Bloc1s2	0.384799	0.207804	0.65991	0.65948	0.896029	0.626441	0.764945	0.714986	0.863696	0.634824	0.677756	0.774449	0.753251	0.800121	0.744771	0.652282	0.842274	0.773387	0.688789	0.568206	0.714094
Bloc1s3	0.0984325	0	0.0884921	0.247466	0.114334	0.17665	0.12931	0.154876	0.145449	0.112816	0.113627	0.122456	0.200191	0.155794	0.166111	0.177471	0.131849	0.0725171	0.0869465	0.108093	0.10009
Bloc1s4	0.182091	0.116019	0.323445	0.443637	0.337317	0.312639	0.361318	0.356981	0.326468	0.353304	0.34703	0.316919	0.34274	0.329216	0.358636	0.241769	0.34673	0.29799	0.280389	0.302237	0.308698
Bloc1s5	0.112439	0	0.213563	0.247466	0.242411	0.267815	0.235188	0.264985	0.261002	0.226851	0.268002	0.275282	0.286866	0.20526	0.265381	0.255429	0.245462	0.22393	0.234946	0.197274	0.196673
Bloc1s6	0.223487	0.139086	0.287176	0.481212	0.352057	0.245199	0.365438	0.334225	0.44199	0.325321	0.317614	0.307167	0.277054	0.366071	0.336167	0.32745	0.342051	0.265032	0.305643	0.115268	0.291485
Bloc1s6os	0	0.0232537	0	0	0.0156244	0.0186905	0.0109888	0.0187657	0.0248422	0.00672942	0.00828148	0.0153447	0.00765299	0.00558656	0.017565	0.00469482	0.00826437	0.00806443	0.0137453	0.0180496	0.00514137
Blvra	0.449498	0.0928896	0.188751	0.287682	0.252516	0.258784	0.247999	0.32151	0.299835	0.220287	0.225819	0.265415	0.306407	0.329216	0.146278	0.228065	0.133488	0.272813	0.293588	0.236068	0.32094
Blvrb	0.154316	0.069711	0.0884921	0.0208318	0.114334	0.0746969	0.10967	0.0830145	0.0744653	0.0685869	0.0909718	0.074101	0.147425	0.111501	0.115178	0.0656805	0.0924303	0.116671	0.082381	0.183091	0.0719174
Blzf1	0.0703645	0.069711	0.188751	0.32745	0.17104	0.121198	0.179258	0.202369	0.151593	0.128849	0.164883	0.114837	0.142376	0.183329	0.180943	0.135733	0.128571	0.148646	0.0983522	0.0865346	0.115425
Bmi1	0.16822	0.0928896	0.101094	0.145321	0.103979	0.116558	0.153246	0.173393	0.15773	0.124844	0.0847845	0.117377	0.0993264	0.13368	0.145037	0.117103	0.125292	0.124677	0.10405	0.0757398	0.120531
Bmp1	0.0281653	0.116019	0.0379656	0.0416546	0.0728522	0.0186905	0.0329611	0.0348455	0.0434646	0.0349861	0.0144922	0.0179019	0.0204067	0.0335133	0.017565	0.00938953	0.0247908	0.0161283	0.0194719	0.0433078	0.0231342
Bmp2	0.0703645	0	0	0	0.0624594	0.0793559	0.144551	0.128334	0.0372585	0.132852	0.0538043	0.0127874	0.00765299	0.111501	0.163635	0.112439	0.0743118	0.122676	0.0263429	0.0252681	0.046256
Bmp2k	0.042241	0.18499	0.0126579	0.0832372	0.0520598	0.0420437	0.072464	0.0616232	0.0651712	0.0538098	0.0351894	0.0562363	0.0306075	0.0892669	0.111438	0.060995	0.057819	0.0443403	0.0423699	0.0901306	0.035982
Bmp3	0.014084	0	0.0253138	0	0	0.00934566	0.00439559	0.00268096	0.0186325	0.00134589	0.041396	0.0204589	0.00255102	0.0390962	0.0301084	0.00469482	0.0165282	0.100636	0.0629595	0.0144399	0.00514137
Bmper	0	0.16208	0.0253138	0.0208318	0.0208318	0.00467288	0.015384	0.0348455	0.0186325	0.0309506	0.0248422	0.0306857	0.00765299	0.0446779	0.0564318	0.0375499	0.0264432	0.0181442	0.0492355	0.0433078	0.0385509
Bmpr1a	0.16822	0.0232537	0.113679	0.124677	0.114334	0.116558	0.207303	0.236398	0.166926	0.187328	0.109512	0.135138	0.129738	0.210727	0.148761	0.0937593	0.110519	0.134673	0.152897	0.111681	0.115425
Bmpr1b	0.014084	0	0	0.0208318	0.0104165	0.00934566	0.00439559	0.0053619	0.00310559	0.00403767	0.00621114	0.00255754	0.00255102	0	0.0050188	0.014084	0.00165289	0.00604835	0.00572735	0.00722015	0.0205641
Bmpr2	0.126424	0.18499	0.649553	0.676397	0.684793	0.68753	0.756515	0.578456	0.723914	0.544672	0.655886	0.493758	0.568387	0.651293	0.623753	0.613388	0.63429	0.509877	0.507184	0.410736	0.554666
Bms1	0.0984325	0.16208	0.188751	0.103979	0.191535	0.158218	0.151073	0.146924	0.130068	0.130184	0.168967	0.135138	0.0840846	0.105947	0.179709	0.13108	0.0907843	0.0946168	0.107468	0.05052	0.0975317
Bmt2	0.140384	0.0928896	0.138794	0.307625	0.272651	0.240661	0.262895	0.29593	0.267003	0.288059	0.262003	0.2257	0.210184	0.259643	0.267804	0.241769	0.206788	0.176502	0.183392	0.140333	0.143466
Bmyc	1.49292	0.945646	1.36752	1.39606	1.64916	1.53005	1.37682	1.37568	1.45469	1.24484	1.50838	1.4402	1.56457	1.45853	1.44979	1.43943	1.47569	1.44903	1.4893	1.43228	1.67875
Bnc2	0	0.069711	0	0	0	0.0700362	0	0.0053619	0.0217374	0.0457445	0.0144922	0.00255754	0	0.0558369	0.437594	0.241769	0.312256	0.0403117	0.028633	0.0829374	0.00514137
Bnip1	0.0844068	0.116019	0.201172	0.124677	0.150473	0.190436	0.172766	0.202369	0.176107	0.176737	0.13212	0.165484	0.162549	0.194306	0.14752	0.163589	0.182457	0.122676	0.151765	0.122438	0.133281
Bnip2	0.182091	0.16208	0.101094	0.103979	0.0936132	0.065374	0.1053	0.0830145	0.077562	0.0940738	0.142376	0.104668	0.0739123	0.066989	0.122653	0.060995	0.094076	0.0664833	0.0766717	0.0937255	0.0642232
Bnip3	0.920655	0.470787	0.740556	0.821204	0.66796	0.824072	0.784991	0.758829	0.731213	0.728037	0.681096	0.591499	0.992242	0.965667	0.965704	0.792375	0.920559	0.864162	0.691543	0.868552	0.710027
Bnip3l	1.06724	0.669729	1.07304	0.939089	0.956639	1.14448	0.965781	0.900204	0.982955	0.940078	0.98567	0.892183	1.24193	1.11305	1.19232	1.07587	1.19797	1.01313	0.933835	1.16126	1.07264
Boc	0.042241	0.0464949	0.0379656	0	0.0104165	0.0140182	0.00439559	0.0053619	0.00621114	0.00269179	0.00828148	0.00255754	0.0102039	0.00558656	0.0112921	0.0281653	0.042962	0.00806443	0.0114545	0.0144399	0.0231342
Bod1	0.39787	0.16208	0.798481	0.790169	1.04759	0.717269	0.958454	0.898333	0.978871	0.948263	1.02837	0.987504	0.901077	0.931807	0.925046	0.943064	0.906854	0.75642	0.812524	0.725322	0.848273
Bod1l	0.881374	0.428616	0.907972	0.774409	0.946136	0.887967	0.951086	0.927982	0.907481	0.912433	0.948535	0.987504	0.719467	0.787539	0.848163	0.851178	0.913724	0.837952	0.830253	0.84518	0.823886
Bok	0.250881	0.207804	0.670206	0.607727	0.337317	0.735585	0.400219	0.372054	0.661802	0.52825	0.266003	0.270352	0.49486	0.669518	0.507428	0.49586	0.406863	0.459468	0.432025	0.218474	0.398138
Bola1	0.512482	0.275569	0.845114	0.693147	0.709731	0.559184	0.671469	0.783344	0.659269	0.686404	0.667697	0.696724	0.641345	0.58124	0.684341	0.640703	0.722309	0.6173	0.675876	0.370525	0.574548
Bola2	1.15101	1.09395	1.57179	1.38629	1.51578	1.41399	1.48322	1.52566	1.51361	1.45084	1.37195	1.37647	1.24871	1.39774	1.4054	1.40736	1.48285	1.40605	1.40029	1.37713	1.35642
Bola3	1.0321	0.592607	0.976487	0.910532	1.10795	1.16856	1.11607	1.31016	0.93944	1.14562	1.07225	0.931115	1.13382	0.998692	1.00273	0.914185	0.898797	0.872794	0.999294	1.01967	0.913718
Bop1	0.126424	0.0928896	0.138794	0.145321	0.0832372	0.116558	0.107485	0.0910271	0.102306	0.0994323	0.11157	0.0638951	0.144901	0.166823	0.131366	0.13108	0.110519	0.106653	0.109745	0.147479	0.105204
Bora	0.0844068	0.18499	0.0253138	0	0.0520598	0.0280337	0.0109888	0.0268064	0.0434646	0.0349861	0.0269119	0.01023	0.0229572	0.066989	0.0301084	0.042241	0.0545184	0.0544086	0.0229075	0.0108301	0.0179939
Borcs5	0.291624	0.275569	0.275002	0.443637	0.307625	0.263302	0.334393	0.389537	0.305772	0.346967	0.343124	0.260472	0.313707	0.438341	0.300357	0.282608	0.299629	0.229826	0.285895	0.204351	0.251829
Borcs6	0.291624	0.230511	0.586114	0.742399	0.572395	0.567221	0.55179	0.532165	0.533357	0.543503	0.581565	0.58933	0.508423	0.478712	0.445585	0.445237	0.452199	0.351583	0.481724	0.32288	0.445292
Borcs7	0.549405	0.612199	1.21909	1.11105	1.24843	1.19217	1.31025	1.28426	1.19304	1.19886	0.996477	0.910015	1.00383	1.10641	0.928481	1.0816	0.988168	0.971072	1.11906	0.986997	1.10528
Borcs8	0.384799	0.470787	0.700725	0.709731	0.790169	0.746474	0.788307	0.815429	0.649101	0.692878	0.759281	0.910015	0.770849	0.779092	0.885803	0.745812	0.778462	0.702797	0.65913	0.658866	0.652035
Bpgm	0.209727	0.18499	0.406439	0.32745	0.337317	0.439031	0.41845	0.431523	0.475649	0.405983	0.472863	0.379567	0.418774	0.463655	0.390268	0.31853	0.298047	0.379908	0.42259	0.229039	0.274187
Bphl	0.331901	0.16208	0.371166	0.499768	0.307625	0.365631	0.323973	0.433971	0.344101	0.318927	0.350931	0.372406	0.299092	0.355587	0.291946	0.282608	0.315406	0.307625	0.342627	0.284937	0.301332
Bpnt1	0.830691	0.2979	0.406439	0.499768	0.371597	0.514396	0.503703	0.566985	0.433499	0.456399	0.444813	0.447799	0.442091	0.42814	0.477281	0.470689	0.484905	0.415372	0.384499	0.380634	0.463901
Bptf	1.04098	0.428616	0.993084	0.994457	1.15362	1.07503	1.12514	1.13455	1.1311	1.10452	1.03492	1.1027	0.973822	1.13928	1.08219	1.09861	1.01914	1.02472	1.02649	0.938885	0.996408
Braf	0.331901	0.069711	0.441239	0.462501	0.457799	0.506148	0.540351	0.499124	0.514294	0.479405	0.448573	0.450119	0.366725	0.473704	0.43187	0.462236	0.432656	0.322984	0.446629	0.207886	0.379034
Brap	0.126424	0.18499	0.151321	0.347152	0.211951	0.22246	0.303033	0.228568	0.200517	0.208447	0.160797	0.203202	0.230107	0.221644	0.192042	0.246328	0.188956	0.152632	0.16534	0.154618	0.178991
Brat1	0.014084	0.0464949	0.0506113	0	0.0624594	0.0373745	0.0636932	0.0402036	0.0372585	0.0430553	0.0372585	0.0460196	0.0535458	0.066989	0.0614419	0.0469311	0.0495665	0.0322525	0.0251978	0.021659	0.0308434
Brca1	0.014084	0.0232537	0.0126579	0	0.0104165	0.00467288	0.00439559	0.00268096	0.00310559	0.00269179	0.00621114	0.00511507	0	0.00558656	0.00376411	0.00469482	0	0.00806443	0.00572735	0	0.00514137
Brca2	0.0563083	0.0464949	0.0379656	0.0208318	0.0156244	0.0280337	0.0329611	0.0214461	0.012422	0.01615	0.0289815	0.035798	0.0178562	0.016759	0.0125467	0.0375499	0.0198334	0.0241912	0.0194719	0.0180496	0.0231342
Brcc3	0.209727	0.0464949	0.429693	0.424624	0.400653	0.321534	0.476292	0.372054	0.461684	0.313802	0.255994	0.309608	0.411737	0.407613	0.391433	0.367274	0.32954	0.417225	0.308923	0.22552	0.371835
Brd1	0.0703645	0.069711	0.138794	0.307625	0.222127	0.204186	0.209454	0.181311	0.20356	0.224227	0.213691	0.150328	0.222646	0.227093	0.245945	0.191319	0.243857	0.138668	0.11316	0.0973192	0.178991
Brd2	0.690328	0.512193	0.639133	0.821204	0.655225	0.657254	0.746339	0.801476	0.519758	0.658061	0.694389	0.708929	0.564006	0.618937	0.663017	0.667602	0.680205	0.622347	0.547295	0.530693	0.547994
Brd3	0.644571	0.230511	0.628652	0.554481	0.994457	0.792804	0.89221	0.915088	0.861471	0.858348	0.804706	0.725061	0.96706	0.795939	0.800168	0.709033	0.824146	0.672047	0.711601	0.552661	0.764072
Brd3os	0.278092	0.069711	0.359307	0.247466	0.371597	0.370004	0.269262	0.336762	0.227837	0.286767	0.303794	0.267884	0.232591	0.291925	0.325466	0.27357	0.323266	0.233753	0.227137	0.147479	0.224335
Brd4	0.549405	0.253103	0.740556	0.642396	0.697309	0.610832	0.675028	0.779285	0.714132	0.67882	0.635452	0.723053	0.635023	0.628241	0.706394	0.738523	0.616414	0.576417	0.554234	0.469882	0.611548
Brd7	0.474904	0.428616	0.45273	0.481212	0.563458	0.518508	0.578225	0.546165	0.533357	0.538822	0.515205	0.514133	0.399965	0.557294	0.49073	0.524863	0.456686	0.461288	0.496018	0.407408	0.445292
Brd8	0.537171	0.407253	0.854265	0.65948	0.801882	0.757289	0.771656	0.729735	0.638874	0.733299	0.705934	0.839162	0.695187	0.757771	0.766977	0.813397	0.763346	0.688301	0.718834	0.652962	0.769964
Brd9	1.01417	1.49446	0.680441	1.0213	0.855357	0.83776	0.794917	0.846836	0.850293	0.847669	0.900278	0.833564	0.780539	0.791745	0.813244	0.753067	0.767139	0.764155	0.741232	0.847796	0.808676
Brdt	0.16822	0.0928896	0.138794	0.0832372	0.181297	0.153601	0.200845	0.215487	0.191376	0.127514	0.197472	0.203202	0.134796	0.155794	0.248379	0.158954	0.167806	0.17253	0.1495	0.104503	0.163791
Brf1	0.0844068	0.0232537	0.126247	0.165905	0.17104	0.111916	0.202999	0.146924	0.185274	0.160813	0.134173	0.107211	0.15247	0.105947	0.105201	0.0937593	0.094076	0.102642	0.115436	0.0324853	0.138375
Brf2	0.250881	0.069711	0.1763	0.103979	0.155621	0.144358	0.1489	0.144271	0.136224	0.123508	0.138275	0.112296	0.0917081	0.122598	0.140069	0.16822	0.108876	0.0845766	0.116574	0.0865346	0.10776
Bri3	1.35181	0.881374	1.52019	1.27303	1.41054	1.22547	1.46794	1.43037	1.30491	1.44844	1.46655	1.44592	1.28336	1.37937	1.57422	1.50292	1.67241	1.39668	1.40772	1.39412	1.33764
Bri3bp	0.31853	0.139086	0.464165	0.953147	0.549977	0.434771	0.566939	0.529822	0.508815	0.469747	0.511556	0.360432	0.622313	0.513453	0.415772	0.474904	0.423583	0.366725	0.438294	0.197274	0.452288
Brinp1	0.126424	0.069711	0.382974	0.32745	0.646683	0.356863	0.635478	0.589859	0.456074	0.447865	0.219759	0.213215	0.435119	0.302622	0.573982	0.402213	0.272643	0.376148	0.359879	0.197274	0.369431
Brinp2	0.0281653	0.470787	0.275002	0.145321	0.145321	0.204186	0.275618	0.101701	0.22178	0.183358	0.175087	0.0970344	0.347552	0.508524	0.475031	0.241769	0.603934	0.35727	0.146101	0.122438	0.115425
Brinp3	0.0703645	0.552806	1.08844	0.572395	0.485865	0.680012	0.644545	0.725535	1.02311	0.156826	0.901722	0.74302	1.13531	1.21778	0.472779	0.851178	0.59137	1.01313	0.570985	0.291867	0.65414
Brip1os	0	0.230511	0.0253138	0.0416546	0.0364503	0.0373745	0.0307644	0.0402036	0.0310509	0.0322959	0.0207025	0.0204589	0.0357067	0.0558369	0.0351245	0.023472	0.0247908	0.0282221	0.0377917	0.0252681	0.035982
Brix1	0.209727	0.0928896	0.101094	0.124677	0.124677	0.0793559	0.10967	0.107034	0.142376	0.0913936	0.140326	0.135138	0.109475	0.183329	0.112685	0.103104	0.115446	0.116671	0.10519	0.0901306	0.117978
Brk1	1.37212	1.12165	1.43796	1.17143	1.74337	1.43945	1.61953	1.65368	1.55582	1.5879	1.62744	1.5156	1.34223	1.35531	1.58168	1.58534	1.642	1.4861	1.46846	1.4404	1.44249
Brms1	0.126424	0.0232537	0.0379656	0.0208318	0.0728522	0.065374	0.103114	0.0963655	0.058972	0.0927338	0.0909718	0.0970344	0.101865	0.066989	0.111438	0.0656805	0.0990117	0.0644715	0.0503796	0.0685384	0.0642232
Brms1l	0.331901	0.116019	0.394732	0.424624	0.32745	0.493715	0.422484	0.487199	0.352879	0.387285	0.420234	0.341169	0.407034	0.443426	0.472779	0.376051	0.397698	0.336363	0.351265	0.253591	0.364618
Brox	0.0984325	0.0928896	0.238246	0.32745	0.312593	0.285812	0.315613	0.359498	0.24596	0.277709	0.289917	0.255522	0.289314	0.286565	0.326657	0.26451	0.248669	0.170543	0.221551	0.200814	0.221827
Brpf1	0.0281653	0.069711	0.1763	0.103979	0.129843	0.116558	0.1402	0.170751	0.120824	0.0994323	0.0950947	0.157911	0.114545	0.155794	0.117671	0.112439	0.0858449	0.0946168	0.130216	0.0973192	0.112871
Brpf3	0.0844068	0.0232537	0.0506113	0.0624594	0.0260387	0.0560454	0.0834197	0.0803425	0.077562	0.0524658	0.0703354	0.0638951	0.056093	0.0502582	0.0301084	0.0375499	0.0380074	0.0282221	0.0435143	0.0397008	0.0411195
Brs3	0	0	0	0	0.00520831	0.00467288	0.00659336	0.0160851	0.00621114	0.00403767	0.0165624	0.712977	0	0	0.0012547	0.00469482	0.00165289	0.00201613	0.00229095	0.00722015	0.00257069
Brsk1	0.0844068	0.16208	0.250535	0.206855	0.292679	0.294778	0.25439	0.267573	0.197472	0.234716	0.201532	0.180602	0.215173	0.216189	0.196967	0.205131	0.185708	0.168556	0.200262	0.211418	0.20675
Brsk2	0.26451	0.207804	0.382974	0.481212	0.381317	0.481212	0.369553	0.460737	0.355799	0.388535	0.376159	0.396202	0.411737	0.433246	0.351559	0.384799	0.352956	0.317233	0.30783	0.264068	0.352549
Brwd1	0.250881	0.230511	0.690614	0.462501	0.722059	0.695015	0.715414	0.669931	0.723914	0.693955	0.654192	0.710954	0.733465	0.727425	0.725205	0.774632	0.770923	0.612238	0.620373	0.41406	0.79909
Brwd3	0	0.069711	0.101094	0.186418	0.0572604	0.0280337	0.0768474	0.0749967	0.0341548	0.0551537	0.0558715	0.035798	0.0535458	0.0614139	0.055179	0.0703645	0.0644182	0.0463544	0.0549552	0.021659	0.0539584
Bscl2	0.597594	0.864833	0.700725	0.939089	0.88872	0.792804	0.78665	0.850714	0.790753	0.809167	0.732021	0.717015	0.735455	0.800121	0.839054	0.788843	0.774697	0.791685	0.726036	0.797284	0.848273
Bsdc1	0.140384	0.069711	0.225921	0.267627	0.371597	0.290298	0.340627	0.377061	0.376159	0.320207	0.406898	0.365228	0.240035	0.227093	0.379764	0.345215	0.343612	0.29799	0.251632	0.190187	0.196673
Bsg	2.44438	1.95609	1.97782	2.32058	2.19341	2.18473	2.12724	2.16204	2.1346	2.11986	2.00561	2.13486	2.2768	2.15395	1.99679	2.07749	2.08464	2.20672	2.12375	2.22219	2.20684
Bsn	0.500028	0.116019	0.275002	0.424624	0.242411	0.387431	0.288297	0.32151	0.314658	0.291933	0.264003	0.22071	0.262288	0.386921	0.22764	0.34964	0.291713	0.266978	0.267143	0.183091	0.318495
Bspry	0	0	0	0	0	0.00467288	0.00659336	0.0107237	0.00310559	0.0134585	0.0165624	0.00255754	0	0.00558656	0.0012547	0.00469482	0.00330578	0.00604835	0.00343642	0.00722015	0
Bst1	0	0	0.0126579	0	0.00520831	0.00467288	0.0087911	0.0053619	0.00931664	0.00538355	0.00207039	0.00767256	0.00510202	0	0.00627348	0.00938953	0.00330578	0.0120965	0.00801824	0	0
Bst2	0	0.0232537	0	0	0.0208318	0.00467288	0.0219763	0.0160851	0.00310559	0.00269179	0.0165624	0.01023	0.00510202	0	0.017565	0.0187782	0.0297477	0.00806443	0.00114548	0.0036101	0.00771201
Btaf1	0.014084	0.069711	0.0506113	0.103979	0.0416546	0.0327045	0.0483328	0.0589471	0.0961252	0.0511217	0.0476011	0.0409093	0.0357067	0.0614139	0.0576844	0.0469311	0.0677168	0.0483682	0.0446587	0.0433078	0.0308434
Btbd1	0.26451	0.139086	0.299308	0.443637	0.405465	0.404746	0.476292	0.40938	0.402118	0.396027	0.416431	0.341169	0.421116	0.468685	0.456954	0.340783	0.35917	0.292195	0.336132	0.284937	0.379034
Btbd10	0.182091	0.342124	0.275002	0.307625	0.201753	0.245199	0.207303	0.183947	0.361631	0.213713	0.247969	0.200696	0.235074	0.259643	0.252029	0.223487	0.218101	0.202247	0.222669	0.118854	0.20675
Btbd11	0.014084	0.0464949	0.335446	0.247466	0.405465	0.285812	0.404281	0.48241	0.320568	0.349503	0.253989	0.419787	0.222646	0.508524	0.140069	0.27357	0.261473	0.303774	0.238288	0.190187	0.224335
Btbd17	0.0703645	0.116019	0.1763	0.186418	0.165905	0.0513793	0.116222	0.154876	0.099216	0.108803	0.187309	0.203202	0.066278	0.111501	0.0764625	0.089084	0.0957215	0.0906018	0.106329	0.05052	0.102647
Btbd19	0.014084	0.0464949	0.063249	0.0624594	0.0832372	0.0373745	0.0658864	0.0830145	0.0930334	0.0578412	0.0538043	0.0817503	0.0433538	0.0948299	0.0501672	0.121765	0.0495665	0.0382971	0.0503796	0.0180496	0.0334128
Btbd2	0.384799	0.275569	0.225921	0.462501	0.206855	0.281321	0.284076	0.27016	0.233887	0.260828	0.273992	0.265415	0.247466	0.227093	0.288334	0.246328	0.293297	0.274756	0.202508	0.257086	0.239353
Btbd3	0.656125	0.16208	0.49813	0.866565	0.766468	0.464431	1.16202	0.75264	0.666856	0.903094	0.789195	0.595828	0.839271	0.345067	0.641427	0.709033	0.596964	0.415372	0.500085	0.574389	0.58113
Btbd6	0.112439	0.16208	0.262788	0.165905	0.242411	0.240661	0.247999	0.308744	0.215714	0.209764	0.260001	0.205707	0.207687	0.265042	0.290742	0.291624	0.230998	0.243553	0.200262	0.12602	0.171396
Btbd7	0.331901	0.275569	0.213563	0.247466	0.222127	0.240661	0.284076	0.24161	0.24596	0.224227	0.213691	0.205707	0.217665	0.216189	0.217846	0.177471	0.229388	0.198295	0.208116	0.140333	0.194151
Btbd9	0.223487	0.275569	0.394732	0.386164	0.391002	0.356863	0.444553	0.448608	0.44199	0.403497	0.39733	0.282666	0.366725	0.417897	0.358636	0.362876	0.256676	0.29799	0.341545	0.200814	0.271709
Btc	0	0	0	0	0.0104165	0	0.0263706	0.0107237	0.0186325	0.00942113	0.012422	0.00255754	0.00255102	0	0.00250941	0	0.00826437	0	0.00572735	0.0036101	0.00514137
Btd	0.014084	0	0	0.0416546	0.0260387	0.0140182	0.015384	0.0187657	0.0279467	0.01615	0.0186325	0.0153447	0.0229572	0.016759	0.0238371	0.00938953	0.0380074	0.0161283	0.0229075	0.021659	0.0179939
Btf3	1.69581	1.34591	1.59671	1.64723	1.54379	1.52423	1.48227	1.6082	1.59283	1.66483	1.55456	1.63913	1.54705	1.64827	1.52581	1.56107	1.62834	1.57605	1.62423	1.60135	1.62845
Btf3l4	0.250881	0.0928896	0.382974	0.572395	0.297668	0.356863	0.350991	0.416783	0.329414	0.331703	0.321552	0.338752	0.423455	0.41276	0.438737	0.428116	0.446203	0.34208	0.322012	0.367147	0.3307
Btg1	1.04979	0.275569	0.486866	0.366725	0.734294	0.485387	0.412387	0.308744	0.506071	0.367197	0.832228	0.729069	0.325836	0.498632	0.821589	0.716456	0.836256	0.525834	0.535343	0.824084	0.407639
Btg2	0.500028	0.253103	0.0884921	0.227207	0.272651	0.263302	0.247999	0.24161	0.185274	0.251708	0.199502	0.074101	0.117079	0.17233	0.290742	0.112439	0.151486	0.194339	0.147234	0.288404	0.123082
Btg3	0.0563083	0	0.126247	0.0416546	0.312593	0.0886688	0.271382	0.236398	0.126988	0.271225	0.0662042	0.208211	0.0586399	0.0335133	0.245945	0.0750469	0.110519	0.160599	0.0949318	0.100912	0.133281
Btla	0.0281653	0	0.0126579	0	0.0208318	0.00467288	0.0241735	0.00268096	0.00310559	0.00403767	0.00621114	0	0.00255102	0	0	0	0.00165289	0	0.00229095	0.0036101	0.00257069
Btrc	0.126424	0.139086	0.275002	0.32745	0.356955	0.308183	0.371608	0.40938	0.320568	0.335526	0.34703	0.321784	0.371498	0.345067	0.337354	0.250881	0.342051	0.299919	0.259395	0.175985	0.256808
Bub1b	0	0	0	0.0832372	0	0	0.00439559	0.00268096	0.012422	0.00538355	0.00414077	0.00767256	0.0153055	0.011173	0.00752816	0	0	0	0.0125999	0	0.0205641
Bub3	0.679003	0.320088	0.509336	0.554481	0.585722	0.70618	0.604301	0.775216	0.554928	0.519989	0.578035	0.549873	0.585812	0.557294	0.577199	0.553467	0.534512	0.569516	0.617504	0.552661	0.572349
Bud13	0.0844068	0.116019	0.0506113	0.0208318	0.0728522	0.0560454	0.0483328	0.066974	0.0558715	0.0659011	0.049669	0.035798	0.040805	0.0558369	0.045154	0.0516203	0.039659	0.0564217	0.045803	0.0360932	0.0334128
Bud23	0.0984325	0.230511	0.188751	0.227207	0.129843	0.185844	0.211604	0.257208	0.215714	0.186005	0.229855	0.257998	0.172611	0.216189	0.249596	0.237206	0.237432	0.194339	0.161949	0.183091	0.194151
Bud31	0.291624	0.275569	0.311399	0.443637	0.400653	0.413361	0.448544	0.419245	0.413575	0.401009	0.372293	0.365228	0.453665	0.493669	0.509644	0.35847	0.456686	0.332546	0.356652	0.390706	0.347707
Bves	0	0	0	0	0.00520831	0.00467288	0.0021978	0.00268096	0	0	0.00414077	0.0868473	0.00255102	0	0	0.00938953	0.00165289	0.00201613	0.00458189	0.0036101	0.0154236
Bvht	0.014084	0.0232537	0	0.0416546	0.0208318	0.00934566	0.0307644	0.0187657	0.00310559	0.0148043	0.0186325	0.0127874	0.0433538	0.0335133	0.115178	0.0469311	0.205169	0.0161283	0.0263429	0.0288769	0.0205641
Bysl	0.0844068	0.0464949	0.0884921	0.0208318	0.0832372	0.0700362	0.107485	0.104368	0.099216	0.0940738	0.0971556	0.104668	0.0942482	0.0948299	0.13261	0.0984325	0.105589	0.0946168	0.0755295	0.0288769	0.0719174
Bzw1	0.237206	0.275569	0.680441	0.481212	0.467193	0.720949	0.570709	0.389537	0.599994	0.464902	0.422133	0.348407	0.611652	0.637498	0.599563	0.656125	0.59277	0.473987	0.455971	0.48927	0.523339
Bzw2	0.223487	0.0928896	0.1763	0.32745	0.25756	0.208761	0.179258	0.210244	0.227837	0.205812	0.171008	0.162961	0.192683	0.13368	0.205575	0.232638	0.237432	0.206197	0.166469	0.353596	0.189102
C030005K15Rik	0	0	0.0253138	0	0	0	0.0021978	0.00268096	0	0	0.00414077	0.00767256	0.00255102	0	0.0125467	0	0.00826437	0.00604835	0	0	0.00514137
C030006K11Rik	0.042241	0.069711	0.138794	0.366725	0.103979	0.135103	0.12931	0.149576	0.099216	0.130184	0.130068	0.122456	0.112011	0.139215	0.111438	0.0750469	0.0907843	0.0986303	0.108607	0.0649363	0.0565252
C030007H22Rik	0	0	0	0	0	0	0.0021978	0	0.00621114	0.00538355	0	0	0.0229572	0	0.0514202	0.00938953	0.0231384	0.00403225	0	0.0036101	0
C030014I23Rik	0.112439	0.0928896	0.163823	0.347152	0.322505	0.158218	0.34685	0.346888	0.293888	0.282887	0.279972	0.190659	0.195187	0.199786	0.290742	0.117103	0.177578	0.218027	0.1427	0.0865346	0.140921
C030017D09Rik	0	0	0.0126579	0	0.00520831	0.00467288	0.0131864	0.0107237	0.00310559	0.00269179	0.00414077	0.00767256	0.0102039	0.0223445	0.00627348	0.00469482	0.0198334	0.0100805	0.0125999	0	0.0128531
C030029H02Rik	0.014084	0	0.0253138	0.0416546	0.0260387	0.0233624	0.0175815	0.0509163	0.00621114	0.00942113	0.0207025	0.00511507	0.00510202	0.0223445	0.0150559	0.00938953	0.0247908	0.00201613	0.00801824	0.168871	0.00514137
C030034I22Rik	0.042241	0	0.0126579	0.0208318	0.0416546	0.0373745	0.0636932	0.0428823	0.049669	0.0605283	0.0393273	0.0383538	0.066278	0.0558369	0.0626942	0.0797277	0.0528679	0.0342675	0.0538114	0.0360932	0.0411195
C030037D09Rik	0.0281653	0	0.0253138	0.0624594	0.0468579	0.0420437	0.0241735	0.0482387	0.012422	0.0430553	0.0227724	0.033242	0.0535458	0.0335133	0.0288542	0.0187782	0.0280955	0.0221756	0.0240527	0.0144399	0.0154236
C030047K22Rik	0.014084	0.0232537	0.0126579	0	0.0104165	0.0233624	0.0219763	0.00268096	0.00931664	0.0188414	0.0103518	0.0255727	0.0153055	0.0502582	0.0250915	0.0328579	0.0148755	0.0120965	0.0320678	0.0036101	0.0128531
C130013H08Rik	0.0281653	0	0	0	0.0208318	0.0140182	0.0131864	0.00804281	0.00310559	0.00403767	0.00621114	0.00511507	0.00510202	0.016759	0.0163104	0.014084	0.00661152	0.0120965	0.00572735	0.0036101	0.00514137
C130021I20Rik	0.0703645	0.069711	0.262788	0	0.0156244	0.0327045	0.0197789	0.0160851	0.012422	0.02826	0.0103518	0.0409093	0.57494	0.488694	0.597444	0.462236	0.456686	0.398632	0.285895	0.0829374	0.0231342
C130026L21Rik	0	0.0232537	0.101094	0.0416546	0.0884264	0.0420437	0.192221	0.27016	0.176107	0.228163	0.0868473	0.0664473	0.0866263	0.0614139	0.185879	0.0797277	0.0891381	0.104648	0.0595296	0.0433078	0.0821697
C130071C03Rik	0.0844068	0.0928896	0.113679	0.287682	0.114334	0.0886688	0.133668	0.123014	0.0744653	0.1195	0.154662	0.145269	0.0586399	0.0390962	0.0138013	0.0187782	0.0165282	0.0564217	0.117712	0.115268	0.0719174
C130073E24Rik	1.04098	0.552806	0.740556	0.32745	0.987661	0.281321	0.671469	1.08025	0.89013	0.26603	0.600867	0.336334	0.485771	0.687551	0.176003	0.419511	0.0512173	0.214087	0.485818	0.108093	0.386214
C130080G10Rik	0	0	0.0253138	0.186418	0.0572604	0.0420437	0.0395501	0.0241263	0.058972	0.0242237	0.0248422	0.0179019	0.0229572	0.0390962	0.0238371	0.014084	0.0313998	0.0322525	0.0435143	0.0288769	0.0616576
C1d	1.51085	1.02191	1.52546	1.43428	1.84447	1.43314	1.70018	1.75737	1.64723	1.69058	1.65451	1.7594	1.36448	1.3499	1.65118	1.48889	1.68077	1.66136	1.64489	1.41915	1.46527
C1galt1	0	0.069711	0.0506113	0.0416546	0.119507	0.0560454	0.1489	0.0776699	0.0558715	0.0846901	0.105395	0.119917	0.0357067	0.0390962	0.108944	0.0984325	0.148217	0.0443403	0.0538114	0.021659	0.046256
C1galt1c1	0.0563083	0.069711	0.0506113	0.145321	0.0728522	0.130471	0.12713	0.162819	0.123906	0.134186	0.0930334	0.114837	0.157511	0.128141	0.131366	0.060995	0.118729	0.140665	0.11316	0.143907	0.143466
C1qa	0.0563083	0	0.0379656	0.0208318	0.155621	0.139732	0.138023	0.0883568	0.0806579	0.0779828	0.0662042	0.114837	0.134796	0.0614139	0.0939646	0.089084	0.0874916	0.0865853	0.0880876	0.158184	0.0796074
C1qb	0.0984325	0.16208	0.138794	0.103979	0.155621	0.208761	0.124949	0.123014	0.071368	0.112816	0.099216	0.150328	0.170097	0.0892669	0.120162	0.163589	0.112161	0.118673	0.112022	0.0901306	0.123082
C1qbp	0.745812	0.18499	0.680441	0.866565	0.71385	0.827506	0.768304	0.817411	0.674409	0.824095	0.809329	0.782208	0.835551	0.787539	0.901633	0.799415	0.917145	0.732983	0.668454	0.858211	0.793309
C1qc	0.042241	0.139086	0.113679	0.124677	0.0884264	0.107271	0.10967	0.0562706	0.0744653	0.0739568	0.0558715	0.0562363	0.0967876	0.0558369	0.0764625	0.0797277	0.0710147	0.0845766	0.0583861	0.104503	0.0590916
C1ql1	0.182091	0.139086	0.063249	0.32745	2.24597	1.53775	0.658957	1.80651	1.14374	0.126179	0.331376	0.0868473	0.647644	0.0558369	0.107696	0.0984325	0.205169	0.132675	0.158556	0.175985	0.133281
C1ql2	0.014084	0	0.188751	0.0416546	0.0208318	0.0140182	0.00439559	0.0160851	0.0155273	0.0174957	0.0889097	0	0.0280575	0.453562	0.0138013	0.00938953	0.0148755	0.0100805	0.581747	0.0252681	0.00514137
C1ql3	0.871379	0.116019	0.0379656	3.04678	1.6664	0.417658	0.412387	0.0375247	0.194425	0.888967	2.23441	0.831693	0.207687	0.0390962	0.045154	0.0750469	0.0512173	0.0966238	0.181138	0.122438	0.0770446
C1ql4	0.014084	0	0.0126579	0.0624594	0.155621	0.986323	0.116222	0.272745	0.679427	0.599962	0.20356	0.00511507	0.0229572	0.011173	0.0250915	0.023472	0.0198334	0.0262067	0.0675317	0.0397008	0.0282739
C1qtnf12	0.014084	0.0232537	0.101094	0.124677	0.135006	0.116558	0.0856097	0.0642988	0.11774	0.0806662	0.211666	0.0868473	0.122145	0.0948299	0.135097	0.112439	0.169436	0.130676	0.0686745	0.0937255	0.0513913
C1qtnf2	0	0.0232537	0	0.0208318	0.0416546	0.0327045	0.0395501	0.0241263	0.0434646	0.0174957	0.0269119	0.0230159	0.0102039	0.00558656	0.0012547	0.0328579	0.00495866	0	0.0114545	0	0.0128531
C1qtnf4	1.19866	0.913883	1.83434	1.3565	1.73806	1.37469	1.49923	1.50543	1.66666	1.51981	1.56623	1.73693	1.46062	1.72041	1.37539	1.46237	1.48784	1.61993	1.68177	1.67306	1.61575
C2	0	0	0.0126579	0.0208318	0.00520831	0.00467288	0.0087911	0.0053619	0.0155273	0.00403767	0.00828148	0.0153447	0.00255102	0.016759	0.0100375	0.00938953	0.01157	0.00604835	0.0068728	0.0180496	0.00257069
C230004F18Rik	0.512482	0.864833	0.984811	0.851602	1.06376	0.942782	0.939213	0.896458	0.907481	0.886124	0.959646	0.920605	0.725481	1.08964	0.86172	0.952556	0.792189	0.701192	0.895878	0.63513	0.762103
C230014O12Rik	0.0703645	0.0232537	0.0253138	0.0208318	0.0884264	0.0607104	0.0790386	0.149576	0.0527705	0.0954137	0.0248422	0.0255727	0.127208	0.0446779	0.0777135	0.060995	0.143311	0.0785482	0.0549552	0.0144399	0.0770446
C230021G24Rik	0	0	0.0379656	0.0208318	0.0208318	0.00467288	0.0263706	0.00804281	0.0155273	0.00538355	0.0165624	0.0204589	0.00255102	0.011173	0.0188195	0	0.00826437	0.0120965	0.0103091	0	0.00514137
C230035I16Rik	0.112439	0	0	0.0208318	0.0156244	0.0186905	0.0087911	0.0053619	0.012422	0.00942113	0.00828148	0	0.00510202	0	0	0	0.00330578	0.00403225	0.00572735	0.00722015	0.00257069
C230037L18Rik	0.014084	0.069711	0.0758765	0.0832372	0.0884264	0.0840133	0.0856097	0.101701	0.0868473	0.0618717	0.0847845	0.089395	0.0840846	0.0837011	0.0702058	0.135733	0.084198	0.0664833	0.0698173	0.05052	0.0565252
C230057M02Rik	0.0844068	0	0.0379656	0	0	0.0327045	0	0.00268096	0.00310559	0.00134589	0.00414077	0.01023	0	0.00558656	0	0	0	0.00201613	0.00801824	0.0252681	0.0205641
C2cd2	0	0.0928896	0.0884921	0.0624594	0.0260387	0.0607104	0.0505279	0.0482387	0.0310509	0.0403659	0.0393273	0.0409093	0.056093	0.072562	0.0464074	0.0375499	0.039659	0.0403117	0.0229075	0.0288769	0.0488238
C2cd2l	0.154316	0.0464949	0.3474	0.307625	0.518166	0.290298	0.497858	0.566985	0.299835	0.433164	0.380021	0.39857	0.247466	0.302622	0.382102	0.345215	0.360721	0.284455	0.288094	0.190187	0.274187
C2cd3	0.112439	0.139086	0.126247	0.267627	0.140166	0.0840133	0.1489	0.138963	0.139301	0.151506	0.142376	0.175567	0.106939	0.111501	0.131366	0.145031	0.115446	0.0825674	0.130216	0.0721396	0.112871
C2cd4a	0	0	0	0.0208318	0	0.0140182	0	0.0053619	0.00931664	0.00807528	0	0	0.00765299	0	0.0012547	0.00469482	0.00165289	0.00201613	0.0068728	0	0.0154236
C2cd4b	0.042241	0.0464949	0.0126579	0	0.0312449	0.0327045	0.0197789	0.0241263	0.0155273	0.01615	0.0165624	0.00511507	0.0357067	0.011173	0.00878282	0	0	0.0100805	0.0137453	0.0036101	0.0102826
C2cd4c	0.0703645	0.069711	0.0379656	0.0416546	0.267627	0.0886688	0.19869	0.186583	0.11774	0.120836	0.140326	0.142737	0.0764561	0.0948299	0.168585	0.145031	0.133488	0.142661	0.100632	0.0757398	0.0975317
C2cd4d	0.0703645	0	0.0506113	0.0416546	0.114334	0.0933224	0.0614997	0.112364	0.0868473	0.087372	0.0538043	0.0587897	0.0433538	0.0390962	0.0689541	0.0469311	0.077608	0.0564217	0.0629595	0.0288769	0.0565252
C2cd5	0.182091	0.16208	0.371166	0.424624	0.410268	0.413361	0.454518	0.424164	0.416431	0.446643	0.461684	0.42916	0.289314	0.392109	0.406527	0.462236	0.428123	0.294128	0.3231	0.179539	0.313601
C330007P06Rik	0.237206	0	0.188751	0.307625	0.181297	0.236118	0.159759	0.194482	0.15773	0.151506	0.213691	0.162961	0.197689	0.150272	0.205575	0.200531	0.180831	0.154625	0.108607	0.175985	0.153637
C330011M18Rik	0	0	0.0126579	0.0208318	0.0364503	0.0186905	0.0241735	0.0294863	0.012422	0.0215327	0.0248422	0.035798	0.00510202	0.011173	0.0125467	0.014084	0.0198334	0.00806443	0.016036	0.0144399	0.0102826
C330018A13Rik	0	0	0	0	0.00520831	0.00467288	0.0021978	0.00268096	0	0.00538355	0.00207039	0	0.0153055	0.00558656	0.0100375	0.0187782	0.00826437	0.00201613	0.00458189	0.0144399	0.00771201
C330018D20Rik	0	0.0464949	0.0379656	0.165905	0.0520598	0.0560454	0.0899884	0.0830145	0.0930334	0.063215	0.0971556	0.0944885	0.0967876	0.0892669	0.0827162	0.0516203	0.0693658	0.0483682	0.0572425	0.0252681	0.0513913
C4b	0	0	0	0	0.0156244	0.00934566	0.0087911	0.0107237	0.00621114	0.00807528	0.0144922	0.0179019	0.0127548	0.0223445	0.0188195	0.00938953	0.0181808	0.0100805	0.00572735	0.0180496	0.0128531
C530008M17Rik	0.154316	0.16208	0.49813	0.536404	0.405465	0.387431	0.503703	0.37956	0.525208	0.449086	0.495057	0.54544	0.499391	0.2434	0.24229	0.479111	0.162915	0.257234	0.338298	0.147479	0.383822
C530044C16Rik	0	0	0.0253138	0.0624594	0.00520831	0.00467288	0.00439559	0.00268096	0.00310559	0.00538355	0.00621114	0.00511507	0.00255102	0	0.0050188	0	0.00330578	0	0.0125999	0	0
C530050E15Rik	0.014084	0	0.0379656	0.0208318	0.0156244	0.00934566	0.0702718	0.0294863	0.0434646	0.0188414	0.0207025	0.033242	0	0.00558656	0.0138013	0.00469482	0.00826437	0.00403225	0.0217623	0	0.00514137
C630031E19Rik	0	0	0.0126579	0	0	0.00467288	0.0021978	0.00804281	0	0.0148043	0.0269119	0	0.00255102	0.00558656	0.00250941	0.00469482	0	0	0.00343642	0.0036101	0
C730034F03Rik	0.0281653	0.364001	0.1763	0.206855	0.17104	0.139732	0.142376	0.20762	0.194425	0.13552	0.146474	0.155384	0.167582	0.139215	0.188345	0.186707	0.133488	0.142661	0.138163	0.207886	0.128183
C77080	0	0.069711	0.0379656	0.0208318	0.0260387	0.0420437	0.0175815	0.00804281	0.0155273	0.01615	0.0310509	0.0204589	0.0509983	0.0502582	0.0351245	0.0516203	0.061119	0.0161283	0.0251978	0.0829374	0.0282739
C78859	0.0984325	1.03665	0.213563	0.443637	0.247466	0.276825	0.19869	0.236398	0.218748	0.230786	0.251983	0.150328	0.162549	0.18882	0.262957	0.232638	0.20355	0.108657	0.167599	0.15105	0.135829
C87436	0.26451	0.207804	0.287176	0.307625	0.272651	0.263302	0.338551	0.34436	0.314658	0.285474	0.262003	0.345996	0.257354	0.313286	0.259317	0.291624	0.256676	0.214087	0.220433	0.136757	0.191627
C8g	0	0.116019	0.0126579	0.0208318	0.0364503	0.0233624	0.0395501	0.032166	0.0341548	0.0134585	0.012422	0.0306857	0.0204067	0.0390962	0.0351245	0.014084	0.0231384	0.0161283	0.0171813	0.0180496	0.0128531
C920006O11Rik	0	0	0.0379656	0.0208318	0.0624594	0.0233624	0.0614997	0.0749967	0.0558715	0.063215	0.0765298	0.0868473	0.040805	0.0390962	0.058937	0.0516203	0.0594691	0.0483682	0.0446587	0.0324853	0.0282739
C920021L13Rik	0.0281653	0.0464949	0	0.0416546	0.0312449	0.00934566	0.0197789	0.0187657	0.012422	0.0188414	0.0103518	0.0179019	0.0178562	0.00558656	0.00752816	0.0187782	0.0165282	0.00604835	0.0125999	0.0036101	0.00514137
CAAA01118383.1	0.0984325	0.0928896	0.0506113	0.103979	0.114334	0.0746969	0.120587	0.128334	0.0620719	0.076641	0.0600054	0.0970344	0.0764561	0.066989	0.0964626	0.089084	0.107232	0.0705061	0.0732449	0.05052	0.0949728
Caap1	0.237206	0.207804	0.163823	0.186418	0.232281	0.17665	0.187903	0.199742	0.173048	0.191294	0.22178	0.233175	0.187672	0.17233	0.220297	0.237206	0.197069	0.19038	0.16534	0.12602	0.201714
Cab39	0.549405	0.253103	1.10367	0.994457	1.04434	1.03439	0.945163	1.0455	0.960337	0.955498	0.881374	0.848444	0.985573	0.965667	0.969038	1.01417	0.890693	0.814252	0.846112	0.863391	0.851988
Cab39l	0.140384	0.207804	0.238246	0.307625	0.297668	0.254261	0.303033	0.254613	0.272994	0.260828	0.385803	0.372406	0.264753	0.199786	0.309945	0.269043	0.187332	0.160599	0.308923	0.168871	0.219317
Cabcoco1	0.042241	0.069711	0.0126579	0.0416546	0.0572604	0.0140182	0.0571118	0.104368	0.0279467	0.0672441	0.0455329	0.0511286	0.0178562	0.0335133	0.0977114	0.0984325	0.192203	0.0825674	0.0343575	0.0288769	0.0231342
Cabin1	0.278092	0.320088	0.335446	0.424624	0.448367	0.254261	0.511472	0.491976	0.416431	0.407225	0.437277	0.377182	0.200191	0.313286	0.401892	0.35847	0.360721	0.317233	0.308923	0.239579	0.244348
Cables1	0.0281653	0.0232537	0.0126579	0	0.0364503	0.0607104	0.0702718	0.0348455	0.0682699	0.0618717	0.0579386	0.0562363	0.0229572	0.0502582	0.0526733	0.0703645	0.061119	0.0342675	0.0492355	0.0180496	0.0513913
Cables2	0.0281653	0.0928896	0.0379656	0.206855	0.0884264	0.162831	0.103114	0.130992	0.123906	0.122172	0.0682699	0.0613426	0.162549	0.122598	0.0877168	0.121765	0.117088	0.0745278	0.0949318	0.0433078	0.0898533
Cabp1	0.549405	0.864833	0.275002	0.386164	0.277668	0.285812	0.315613	0.324057	0.332357	0.275117	0.215714	0.162961	0.33792	0.381723	0.168585	0.195927	0.140038	0.142661	0.22937	0.929054	0.271709
Cabp7	0.0703645	0	0.0758765	0.0624594	0.0104165	0.374371	0.015384	0.0053619	0.071368	0.010767	0.0538043	0.0281293	0.0229572	0.0614139	0.017565	0.0281653	0.00991719	0.0241912	0.0903695	0.0360932	0.246843
Cacfd1	0.209727	0.275569	0.575327	0.693147	0.633791	0.468638	0.55179	0.541509	0.514294	0.497404	0.429717	0.534313	0.385769	0.453562	0.45582	0.371666	0.480473	0.385539	0.434116	0.312575	0.414742
Cachd1	0.0281653	0.0464949	0.201172	0.366725	0.191535	0.17665	0.239463	0.301061	0.188326	0.275117	0.164883	0.0230159	0.040805	0.139215	0.245945	0.121765	0.0495665	0.166567	0.0572425	0.0685384	0.0821697
Cacna1a	0.500028	0.449795	0.788977	0.742399	0.844061	0.868095	0.84358	0.823343	0.76721	0.844743	0.738478	0.580631	0.78247	0.897087	0.865313	0.84097	0.740394	0.67368	0.668454	0.655917	0.660441
Cacna1b	0.126424	0.512193	0.720763	0.572395	0.766468	0.547067	0.754824	0.661211	0.666856	0.588574	0.730403	0.710954	0.469774	0.66498	0.811383	0.709033	0.760812	0.591853	0.48684	0.232555	0.502948
Cacna1c	0	0.0232537	0.213563	0.124677	0.191535	0.125836	0.174931	0.149576	0.166926	0.17276	0.154662	0.122456	0.119613	0.117051	0.146278	0.117103	0.0792558	0.120675	0.114299	0.0288769	0.105204
Cacna1d	0.0703645	0.116019	0.113679	0.145321	0.211951	0.158218	0.211604	0.176033	0.194425	0.18865	0.171008	0.178085	0.0967876	0.128141	0.199428	0.126424	0.162915	0.100636	0.10519	0.15105	0.128183
Cacna1e	0.154316	0.0232537	0.3474	0.572395	0.722059	0.426229	0.784991	0.458316	0.472863	0.610152	0.826156	0.897556	0.325836	0.392109	0.541524	0.419511	0.443199	0.272813	0.372751	0.154618	0.289019
Cacna1g	0.154316	0.0232537	0.275002	0.247466	0.237349	0.276825	0.138023	0.170751	0.218748	0.136854	0.193409	0.145269	0.323414	0.323915	0.384438	0.362876	0.459673	0.24551	0.16534	0.111681	0.133281
Cacna1h	0	0.0464949	0.138794	0.0624594	0.150473	0.046712	0.159759	0.072323	0.0806579	0.0605283	0.205588	0.19317	0.038256	0.0502582	0.141311	0.089084	0.0809034	0.0362824	0.0618163	0.0360932	0.0231342
Cacna1i	0.0844068	0.0232537	0.275002	0.347152	0.247466	0.0933224	0.340627	0.239005	0.215714	0.218973	0.140326	0.074101	0.0255074	0.066989	0.128878	0.149675	0.084198	0.0765382	0.144967	0.0288769	0.110316
Cacna2d1	0.809913	0.631584	1.25967	0.65948	1.09548	0.81718	1.49173	1.69732	1.35104	1.50111	1.462	1.36427	0.927505	1.04147	1.73724	1.31243	1.1322	0.958999	1.39174	0.876259	0.199194
Cacna2d2	0.126424	0.0928896	0.61811	0.462501	0.684793	0.59509	0.984647	0.911382	0.497816	0.783952	0.391573	0.265415	0.820577	0.576475	0.846346	0.690328	0.337366	0.524067	0.596326	0.267555	0.808676
Cacna2d3	0	0.207804	0.0253138	0.0208318	0.0676567	0.0186905	0.116222	0.0749967	0.0310509	0.253012	0.0662042	0.0306857	0.00255102	0.066989	0.0276	0.014084	0.0957215	0.0282221	0.0229075	0.312575	0.140921
Cacna2d4	0	0	0	0.0208318	0.00520831	0.0233624	0.0087911	0.0107237	0.0155273	0.00403767	0.0103518	0.00511507	0.00765299	0.011173	0.00752816	0.00469482	0.00661152	0.00604835	0.00458189	0.0036101	0.0128531
Cacnb1	0.140384	0.069711	0.311399	0.347152	0.297668	0.263302	0.392075	0.34436	0.239927	0.293223	0.275986	0.250567	0.249941	0.194306	0.323083	0.34964	0.263071	0.22393	0.220433	0.104503	0.194151
Cacnb2	0.0563083	0.18499	0.188751	0.206855	0.337317	0.23157	0.303033	0.318961	0.236908	0.228163	0.251983	0.280206	0.259822	0.259643	0.365696	0.340783	0.263071	0.239635	0.202508	0.0865346	0.178991
Cacnb3	0.39787	0.253103	0.418092	0.481212	0.395832	0.365631	0.607997	0.529822	0.605226	0.376003	0.621696	0.509622	0.510676	0.493669	0.544794	0.457998	0.54171	0.499172	0.352344	0.377268	0.414742
Cacnb4	0.291624	0.16208	0.720763	0.676397	0.603347	0.799809	0.62819	0.672104	0.771947	0.755209	0.602611	0.600148	0.43046	0.770599	1.0003	0.89459	0.759544	0.520528	0.720637	0.586697	0.652035
Cacng2	0.278092	0.18499	0.710775	1.15959	0.730226	0.939617	0.867317	0.758829	0.699347	0.81416	0.709218	0.725061	0.77667	0.614266	0.803916	0.806422	0.654697	0.685063	0.739452	1.12363	0.705951
Cacng3	0.0281653	0	0.188751	0.554481	0.242411	0.162831	0.120587	0.130992	0.387728	0.550505	0.333337	0.576267	0.112011	0.0558369	0.184645	0.250881	0.0313998	0.0865853	0.218196	0.118854	0.338
Cacng4	0.140384	0	0.45273	0.206855	0.563458	0.294778	0.546079	0.503875	0.396371	0.499793	0.478432	0.415087	0.357154	0.376516	0.83631	0.675211	0.964174	0.620666	0.319834	0.143907	0.266748
Cacng5	0.0563083	0.139086	0.113679	0.0416546	0.135006	0.0560454	0.179258	0.186583	0.126988	0.0900532	0.105395	0.0868473	0.109475	0.10039	0.279894	0.121765	0.0363556	0.19038	0.124535	0.0721396	0.0436879
Cacng7	0.140384	0.207804	0.475544	0.481212	0.371597	0.563207	0.323973	0.293361	0.364543	0.326599	0.273992	0.304725	0.364335	0.402455	0.305154	0.565602	0.316979	0.345884	0.331794	0.271038	0.364618
Cacng8	0	0	0.126247	0	0.0936132	0.0420437	0.0658864	0.0910271	0.0961252	0.0659011	0.0847845	0.0689989	0.056093	0.0502582	0.0814657	0.042241	0.0627687	0.0584345	0.0583861	0.0541252	0.0667884
Cactin	0.126424	0.069711	0.101094	0.186418	0.145321	0.172047	0.166266	0.178672	0.126988	0.124844	0.175087	0.185633	0.13985	0.17233	0.188345	0.145031	0.158019	0.146651	0.138163	0.129601	0.130733
Cacul1	0.0984325	0.0464949	0.3474	0.227207	0.405465	0.370004	0.385951	0.419245	0.317614	0.35457	0.335297	0.302281	0.267217	0.291925	0.41923	0.331901	0.331107	0.284455	0.269354	0.253591	0.279137
Cacybp	1.15908	0.65076	0.925427	1.15959	1.02792	1.02848	1.10431	1.12514	0.970665	1.01976	1.08362	1.05277	1.24057	0.973077	1.00192	0.891298	1.00748	0.993582	0.997064	1.05153	1.08517
Cad	0	0	0.0126579	0.0416546	0.0312449	0.0280337	0.0285675	0.0348455	0.0248422	0.0269147	0.0351894	0.0383538	0.0153055	0.0335133	0.0138013	0.00469482	0.0148755	0.0100805	0.0263429	0.0252681	0.0282739
Cadm1	0.871379	1.47441	1.31168	0.65948	1.21482	0.764458	1.55038	1.70678	1.47917	1.55357	1.63369	1.6439	0.539737	1.21474	2.27943	1.55539	2.43736	1.44364	1.34799	1.87943	0.940106
Cadm2	0.371666	0.407253	0.976487	1.72194	0.766468	1.29892	1.19537	0.674275	0.945743	0.913364	0.860729	0.563115	1.29901	1.1994	0.94468	1.22434	1.15136	0.948175	0.757166	0.756173	0.996408
Cadm3	1.04979	0.631584	1.01759	1.13556	0.873989	1.06643	1.11086	1.0218	1.06589	1.09078	1.10481	1.09349	0.841127	1.01669	1.05677	1.29581	1.09298	1.10063	0.920511	1.05602	0.825776
Cadm4	0.656125	0.116019	0.406439	0.896029	0.567931	0.455995	0.528848	0.654642	0.530644	0.492619	0.378091	0.358031	0.512925	0.448499	0.405369	0.384799	0.412956	0.366725	0.390886	0.620132	0.431239
Cadps	0.939885	0.8481	0.835905	0.994457	0.956639	1.38574	1.06295	1.51222	0.916077	1.24913	0.848796	0.924117	1.21162	1.25371	1.04111	1.1564	1.10191	0.874228	1.00448	0.97513	1.14602
Cadps2	0.112439	0	0.151321	0.0208318	0.160765	0.0607104	0.0461375	0.123014	0.163862	0.0390211	0.0620719	0.0255727	0.0815423	0.10039	0.0764625	0.0750469	0.403812	0.0966238	0.202508	0.0613334	0.186576
Cage1	0	0	0	0	0.0572604	0.0560454	0.0549174	0.0696488	0.0527705	0.0417107	0.0476011	0.035798	0.040805	0.0446779	0.0439006	0.0187782	0.0313998	0.0604471	0.0377917	0.00722015	0.0411195
Calb1	0.0703645	0.16208	0.607506	0.186418	1.97993	0.097974	1.09377	0.27791	0.503322	1.38938	0.588607	0.82982	0.217665	0.18882	1.43406	1.44783	1.76374	0.5539	0.291391	0.536994	0.291485
Calb2	4.8903	1.41199	1.96049	1.63947	1.99534	1.52811	1.36634	0.951609	2.84497	2.21503	1.75573	0.774449	1.25546	1.31125	3.10023	2.76594	3.14955	3.01986	2.29018	2.08504	1.5757
Calca	0.0281653	0.16208	0.1763	0.0624594	0.0780457	0.0886688	0.146726	0.0803425	0.11774	0.111478	0.099216	0.127531	0.222646	0.0948299	2.69245	1.33806	0.449203	0.259185	0.369539	0.601969	0.105204
Calcb	0	0	0.0126579	0	0	0.00467288	0	0	0	0	0.00414077	0.00255754	0.00765299	0.00558656	0.0702058	0.023472	0.0132228	0.00806443	0.00916367	0.00722015	0.0102826
Calcoco1	0.140384	0.253103	0.113679	0.124677	0.140166	0.17665	0.174931	0.239005	0.151593	0.183358	0.16284	0.147799	0.232591	0.144745	0.199428	0.177471	0.185708	0.140665	0.109745	0.136757	0.153637
Calcr	0	0	0	0.0208318	0	0.00467288	0.0329611	0.433971	0.00310559	0.0201871	0.0950947	0.091942	0.00255102	0	0	0	0.00826437	0.0523954	0.0320678	0.0036101	0.00771201
Cald1	0.223487	0.275569	0.238246	0.186418	0.165905	0.272323	0.0899884	0.0642988	0.0651712	0.111478	0.251983	0.152857	0.0815423	0.0335133	0.140069	0.089084	0.0479155	0.148646	0.220433	0.533846	0.189102
Calhm2	0	0	0.0126579	0	0.00520831	0.00934566	0.0021978	0.00268096	0.00621114	0.00672942	0.012422	0.00767256	0.00765299	0.00558656	0.0100375	0.014084	0.00991719	0.00403225	0.0068728	0	0.00514137
Calm1	3.60056	2.57258	3.42149	3.5715	3.19097	3.36494	3.30553	3.20463	3.38185	3.23565	3.30611	3.27185	3.23541	3.47227	3.37712	3.29634	3.25919	3.29198	3.23557	3.54924	3.3009
Calm2	3.31525	3.00284	3.55725	3.45231	3.41709	3.54652	3.4868	3.37281	3.5535	3.40989	3.66808	3.53336	3.59092	3.65661	3.57196	3.51446	3.56213	3.58664	3.5043	3.66209	3.53729
Calm3	2.35305	1.77337	2.56985	2.44266	2.29907	2.53096	2.37512	2.31559	2.46593	2.3403	2.44333	2.34161	2.49387	2.56014	2.43384	2.45163	2.48606	2.40642	2.40082	2.35474	2.37974
Caln1	0.140384	0.230511	0.65991	1.88235	0.598956	1.14987	0.651766	0.674275	0.544171	0.464902	0.842793	0.739046	0.739427	0.655867	0.706394	1.18035	1.17115	0.98436	0.70888	0.909177	0.823886
Calr	1.22941	1.03665	1.22595	1.34639	1.47124	1.41613	1.52053	1.42794	1.27148	1.44964	1.20449	1.26701	1.17335	1.28571	1.19163	1.30058	1.2446	1.22131	1.29377	1.23125	1.26199
Calr3	0.0281653	0.0928896	0.0126579	0	0	0.0373745	0.00659336	0.0107237	0.00931664	0.00672942	0.00207039	0	0.0178562	0.0223445	0.00878282	0.00938953	0.00661152	0.0120965	0.00916367	0.0469142	0.0257041
Calu	0.126424	0.0464949	0.1763	0.206855	0.201753	0.185844	0.159759	0.186583	0.20356	0.13952	0.156708	0.168006	0.154991	0.122598	0.193274	0.154316	0.144946	0.150639	0.115436	0.136757	0.117978
Caly	1.91619	1.32301	1.85773	1.51578	2.06524	1.58655	1.94529	1.97489	1.94243	2.00152	1.96487	2.13546	1.61061	1.71653	1.89826	1.82437	1.93648	1.8994	1.91295	1.67959	2.01435
Camk1	0.723846	0.631584	0.807926	0.758486	1.05084	0.76803	1.13542	1.09968	0.943645	1.04864	0.907481	0.752909	0.86869	0.837246	0.912088	0.844381	0.612263	0.672047	0.74301	0.693869	0.787506
Camk1d	0.042241	0.230511	0.486866	0.0832372	0.186418	0.172047	0.464441	0.372054	0.236908	0.170107	0.201532	0.124994	0.040805	0.13368	0.130122	0.16822	0.113804	0.110661	0.262718	0.165311	0.158716
Camk1g	0.014084	0.0232537	0.225921	0.103979	0.129843	0.0933224	0.116222	0.141617	0.102306	0.0994323	0.136224	0.175567	0.0688232	0.0892669	0.0877168	0.13108	0.0973667	0.100636	0.109745	0.0937255	0.176461
Camk2a	0.0984325	0.0464949	0.788977	0.366725	0.942617	0.240661	0.812945	0.665577	0.740892	0.48061	0.786073	0.580631	0.147425	0.696496	0.816959	0.621235	0.59277	0.311472	0.314383	0.165311	0.224335
Camk2b	0.920655	1.14875	1.67736	1.20626	1.41533	1.21532	1.31906	1.29796	1.50576	1.29253	1.23818	1.3141	0.844833	1.33625	1.15407	1.39428	1.17954	1.18803	1.28791	0.931518	1.12053
Camk2d	1.50491	0.631584	1.59177	0.96706	1.50261	1.51839	1.54949	1.32756	1.50707	1.39127	1.345	1.43214	0.622313	1.06578	1.03953	2.04455	0.923964	1.42178	1.5251	1.19376	0.959137
Camk2g	0.561565	0.68849	1.253	0.836482	0.939089	0.854691	0.933238	0.842946	0.949929	0.721701	1.00853	1.11487	0.537516	0.998692	0.839054	0.933505	0.855425	0.754868	1.00744	0.883924	0.754201
Camk2n1	2.03132	1.88263	3.29767	2.34064	2.9026	2.3106	3.0269	2.35819	2.93904	2.38034	3.03325	3.14125	2.80209	3.45373	3.77882	3.50097	3.31398	3.0228	2.76202	2.78005	2.44464
Camk2n2	1.47469	1.16207	2.28476	1.90685	1.93964	2.06014	1.90768	1.69827	2.17091	1.83659	1.95514	2.004	1.72135	2.09336	2.00612	2.08326	1.88576	1.97674	2.05217	1.62351	1.90352
[truncated: 12,439 more rows]

## Sheet: percent
	N1	N2	N3	N4	N5	N6	N7	N8	N9	N10	N11	N12	N13	N14	N15	N16	N17	N18	N19	N20	N21
0610005C13Rik	0	0.0232558	0	0.0208333	0.00520833	0.0140187	0	0.0160858	0.015528	0.0107672	0.00828157	0.00767263	0.00765306	0.00558659	0.0125471	0.00469484	0.00495868	0.0100806	0.00687285	0.00722022	0.00257069
0610009B22Rik	0.338028	0.162791	0.265823	0.541667	0.401042	0.434579	0.448352	0.469169	0.36646	0.378197	0.412008	0.381074	0.502551	0.379888	0.446675	0.352113	0.436364	0.364919	0.367698	0.249097	0.352185
0610009O20Rik	0.0704225	0.0465116	0.0126582	0.0833333	0.119792	0.088785	0.0945055	0.101877	0.0900621	0.090175	0.0807453	0.0741688	0.0943878	0.0782123	0.0840652	0.0704225	0.0793388	0.0806452	0.0641466	0.0577617	0.0822622
0610010F05Rik	0.084507	0.0930233	0.177215	0.25	0.208333	0.294393	0.241758	0.24933	0.229814	0.199192	0.196687	0.168798	0.255102	0.234637	0.244668	0.230047	0.213223	0.177419	0.174112	0.0974729	0.172237
0610010K14Rik	0.366197	0.0697674	0.443038	0.520833	0.40625	0.495327	0.331868	0.450402	0.434783	0.402423	0.393375	0.370844	0.392857	0.385475	0.412798	0.502347	0.41157	0.340726	0.465063	0.205776	0.439589
0610012G03Rik	0.915493	0.813953	0.835443	0.833333	0.885417	0.845794	0.868132	0.86059	0.81677	0.835801	0.853002	0.808184	0.831633	0.821229	0.880803	0.755869	0.821488	0.796371	0.831615	0.902527	0.840617
0610030E20Rik	0.0704225	0.0697674	0.329114	0.229167	0.286458	0.28972	0.248352	0.209115	0.242236	0.227456	0.258799	0.232737	0.183673	0.251397	0.259724	0.28169	0.241322	0.207661	0.206186	0.108303	0.213368
0610037L13Rik	0.084507	0.209302	0.316456	0.354167	0.328125	0.271028	0.30989	0.243968	0.329193	0.258412	0.291925	0.2711	0.214286	0.329609	0.343789	0.305164	0.280992	0.264113	0.25315	0.140794	0.22365
0610040B10Rik	0.0704225	0.0232558	0.101266	0.145833	0.09375	0.182243	0.167033	0.13941	0.13354	0.139973	0.128364	0.14578	0.145408	0.111732	0.139272	0.126761	0.132231	0.120968	0.152348	0.0577617	0.102828
0610040F04Rik	0	0	0.0632911	0.0625	0.0208333	0.0186916	0.0351648	0.0187668	0.0186335	0.0363392	0.010352	0.0179028	0.0127551	0.027933	0.0276035	0.0187793	0.0214876	0.0241935	0.0229095	0.00361011	0.0102828
0610043K17Rik	0	0	0.0759494	0.0208333	0.0260417	0.0140187	0.00879121	0.0160858	0.0186335	0.0161507	0.0124224	0.0102302	0.0255102	0.0111732	0.0250941	0.0187793	0.00826446	0.0221774	0.0160367	0.00361011	0.0257069
1010001B22Rik	0.028169	0.0232558	0	0	0.00520833	0.0186916	0.00659341	0.00268097	0.00621118	0.0148048	0.010352	0.00255754	0.0127551	0.00558659	0.0100376	0.00938967	0.00991736	0.00201613	0.00572738	0.00722022	0.0102828
1110002L01Rik	0.0704225	0	0.0632911	0.0833333	0.078125	0.0794393	0.103297	0.120643	0.0807453	0.0942127	0.0890269	0.0690537	0.102041	0.122905	0.124216	0.0657277	0.061157	0.0745968	0.0767468	0.0180505	0.059126
1110004E09Rik	0.211268	0.0465116	0.291139	0.333333	0.291667	0.242991	0.32967	0.345845	0.279503	0.279946	0.306418	0.289003	0.216837	0.273743	0.284818	0.28169	0.203306	0.199597	0.221077	0.126354	0.179949
1110004F10Rik	0.971831	0.790698	0.822785	0.854167	0.880208	0.82243	0.901099	0.884718	0.89441	0.860027	0.908903	0.861893	0.895408	0.854749	0.895859	0.830986	0.880992	0.879032	0.859107	0.956679	0.838046
1110006O24Rik	0	0	0	0	0.015625	0.0140187	0.0175824	0.0134048	0.0124224	0.0148048	0.0165631	0.0204604	0.00765306	0	0.0112923	0.0140845	0.0165289	0.0120968	0.0091638	0.00722022	0.0102828
1110008F13Rik	0.267606	0.0465116	0.544304	0.583333	0.411458	0.504673	0.461538	0.434316	0.465839	0.479139	0.443064	0.457801	0.446429	0.52514	0.518193	0.502347	0.528926	0.433468	0.426117	0.245487	0.413882
1110008L16Rik	0.0140845	0.0232558	0.0379747	0	0.0416667	0.0280374	0.0351648	0.0509383	0.0217391	0.0323015	0.0559006	0.0204604	0.0459184	0.0558659	0.0501882	0.0657277	0.0396694	0.0342742	0.0400916	0.0144404	0.0411311
1110008P14Rik	0.788732	0.837209	0.822785	0.75	0.770833	0.85514	0.863736	0.855228	0.819876	0.827725	0.824017	0.762148	0.744898	0.798883	0.883312	0.835681	0.894215	0.818548	0.760596	0.938628	0.655527
1110012L19Rik	0.056338	0.0697674	0.21519	0.25	0.166667	0.135514	0.151648	0.174263	0.15528	0.129206	0.173913	0.176471	0.165816	0.240223	0.17064	0.13615	0.133884	0.175403	0.132875	0.0938628	0.154242
1110015O18Rik	0	0	0.0126582	0.0416667	0.03125	0.0280374	0.0615385	0.142091	0.111801	0.076716	0.0621118	0.0409207	0.114796	0.0167598	0.00501882	0.0469484	0.00991736	0.0362903	0.0389462	0.00722022	0.0231362
1110017D15Rik	0	0.0465116	0.0886076	0.0416667	0.3125	0.0607477	0.314286	0.335121	0.142857	0.18035	0.122153	0.0920716	0.0382653	0.0837989	0.131744	0.0892019	0.128926	0.0544355	0.116838	0.0288809	0.0488432
1110019D14Rik	0.0140845	0.0232558	0.0253165	0	0	0.0046729	0.0197802	0.0268097	0.015528	0.0161507	0.0289855	0.028133	0.0255102	0.027933	0.0263488	0.0140845	0.0231405	0.016129	0.0148912	0.0180505	0.0257069
[truncated: 14,415 more rows]

## Sheet: p-value
	N1	N2	N3	N4	N5	N6	N7	N8	N9	N10	N11	N12	N13	N14	N15	N16	N17	N18	N19	N20	N21
[truncated: 14,392 more rows]
