# Supplementary material for: Molecular and anatomical characterization of parabrachial neurons and their axonal projections
Source: eLife. 2022 Nov 1;11:e81868. doi: 10.7554/eLife.81868 (PMC9668336; doi:10.7554/eLife.81868)
Supplement: Supplementary file 6. [file elife-81868-supp6.xlsx]

## Sheet: (1) all genes
FC	SYMBOL	Input.AVG_Signal	Input.ARRAY_STDEV	IP.AVG_Signal	IP.ARRAY_STDEV	IP.Diff Pval	ILMN_GENE	DEFINITION	SYNONYMS
0.499613	4Cytl1	-39.5973	13.7968	-19.7833	0.0853079	0.823975	4CYTL1	Mus musculus cytokine-like 1 (4Cytl1), mRNA.	Cyt1; 4930443F05Rik; Gm147; C17
0.486609	a	-37.0664	22.1393	-18.0368	16.7574	0.825955	A	Mus musculus nonagouti (a), mRNA.	ASP; As; A<y>; ASIP
0.213185	A1bg	-51.2029	2.99852	-10.9157	8.85849	0.651433	A1BG	Mus musculus alpha-1-B glycoprotein (A1bg), mRNA.	C44
1.22157	A2bp1	982.987	77.3298	1200.79	3.75269	0.429623	A2BP1
0.754416	a2ld1	300.452	9.16103	226.665	64.6305	0.465281	A2LD1	Mus musculus AIG2-like domain 1 (a2ld1), mRNA.	MGC7867
1.3003	A3galt2	72.817	35.0941	94.6842	40.8017	0.818925	A3GALT2	Mus musculus alpha 1,3-galactosyltransferase 2 (isoglobotriaosylceramide synthase) (A3galt2), mRNA.	Gm433; iGb3
0.0411445	A4galt	-32.0769	1.7033	-1.31979	4.79948	0.730844	A4GALT	Mus musculus alpha 1,4-galactosyltransferase (A4galt), mRNA.
0.456819	A4gnt	-24.4148	8.55499	-11.1532	0.621123	0.877581	A4GNT	Mus musculus alpha-1,4-N-acetylglucosaminyltransferase (A4gnt), mRNA.	alpha4GnT; AV080780; Gm798
0.619873	AA388235	405.116	31.766	251.121	9.61124	0.124475	AA388235	Mus musculus expressed sequence AA388235 (AA388235), mRNA.
1.27696	AA407270	-16.4258	16.2224	-20.9751	2.36988	0.959325	AA407270	Mus musculus expressed sequence AA407270 (AA407270), mRNA.	AV006038
1.2087	AA407526	643.8	0.770899	778.159	427.18	0.67084	AA407526
0.999729	AA407659	448.982	29.7844	448.861	199.419	0.896009	AA407659	Mus musculus expressed sequence AA407659 (AA407659), mRNA.	AI414892
1.32859	AA408296	188.226	2.47225	250.075	39.2483	0.599881	AA408296	Mus musculus expressed sequence AA408296 (AA408296), mRNA.	Def; AW045375
1.21031	AA409316	32.6939	5.08184	39.5699	29.9965	0.939783	AA409316	Mus musculus expressed sequence AA409316 (AA409316), mRNA.
2.26057	AA415398	82.6297	38.787	186.791	21.9035	0.289144	AA415398	Mus musculus expressed sequence AA415398 (AA415398), mRNA.	MGC73851; MGC100084
1.61166	AA467197	-12.1015	26.8977	-19.5035	29.1951	0.935873	AA467197	Mus musculus expressed sequence AA467197 (AA467197), mRNA.	Nmes1; MGC58382; RP23-101F14.3
0.593299	AA517853	231.227	23.563	137.187	106.294	0.421447	AA517853
1.08834	AA536717	131.42	1.66279	143.03	92.6503	0.916344	AA536717	Mus musculus expressed sequence AA536717 (AA536717), transcript variant 2, mRNA.	mKIAA0974; MGC32264
1.78889	AA536749	197.6	7.27818	353.483	115.75	0.252352	AA536749
0.77074	AA691260	343.009	71.1931	264.371	95.1864	0.517174	AA691260
-1.00946	AA792892	-29.8174	31.0741	30.0996	40.7578	0.527415	AA792892	Mus musculus expressed sequence AA792892 (AA792892), mRNA.	MGC159137
2.35091	AA881470	65.9487	32.6043	155.04	59.2033	0.483096	AA881470	Mus musculus EST AA881470 (AA881470), transcript variant 1, mRNA.
1.00674	AA960436	101.737	86.6065	102.423	18.0114	0.950035	AA960436	Mus musculus expressed sequence AA960436 (AA960436), mRNA.
10.974	AA986860	5.07582	9.50008	55.7019	40.0447	0.58546	AA986860	Mus musculus expressed sequence AA986860 (AA986860), mRNA.	E030025M07; MGC156398
1.21972	Aaas	457.304	22.6141	557.785	156.343	0.380466	AAAS	Mus musculus achalasia, adrenocortical insufficiency, alacrimia (Aaas), mRNA.	ADRACALA; D030041N15Rik; GL003; AAA
1.29084	Aacs	203.321	18.9772	262.455	88.8138	0.588483	AACS	Mus musculus acetoacetyl-CoA synthetase (Aacs), mRNA.	SUR5; 2210408B16Rik
0.86699	Aadac	-63.6359	0.0821833	-55.1716	1.11484	0.923837	AADAC	Mus musculus arylacetamide deacetylase (esterase) (Aadac), mRNA.	Aada; 5033417E09Rik; AI265437
0.974862	Aadacl1	1645.67	86.0175	1604.3	665.416	0.931726	AADACL1	Mus musculus arylacetamide deacetylase-like 1 (Aadacl1), mRNA.	CPO-BP; B230106I24Rik
0.305241	Aadat	111.771	58.0809	34.1171	22.4377	0.430347	AADAT	Mus musculus aminoadipate aminotransferase (Aadat), mRNA.	KATII; AI875679; Aadt; mKat-2; Kat2
1.21395	Aak1	1303.17	124.93	1581.98	64.0046	0.263622	AAK1	Mus musculus AP2 associated kinase 1 (Aak1), transcript variant 1, mRNA.	mKIAA1048; AU067724; R75501; 5530400K14Rik; 9630042K20; C79663; MGC40785; AU067726; BC028270; D6Ertd245e
1.12227	Aamp	2472.67	146.322	2774.99	506.922	0.430185	AAMP
0.669707	Aanat	-73.9161	2.80543	-49.5021	0.268114	0.782804	AANAT	Mus musculus arylalkylamine N-acetyltransferase (Aanat), mRNA.	Nat4; Nat-2; SNAT; MGC151344
1.22164	Aard	426.108	15.2163	520.55	160.891	0.517085	AARD	Mus musculus alanine and arginine rich domain containing protein (Aard), mRNA.	AV328152; A5D3; MGC107188
1.57763	Aars	897.506	10.1702	1415.93	889.541	0.415245	AARS	Mus musculus alanyl-tRNA synthetase (Aars), mRNA.	AI316495; sti; MGC37368; C76919
3.51967	Aars2	72.9592	34.0103	256.793	21.9489	0.0670975	AARS2	Mus musculus alanyl-tRNA synthetase 2, mitochondrial (putative) (Aars2), nuclear gene encoding mitochondrial protein, mRNA.	Gm89; Aarsl; MGC69820
1.31419	Aarsd1	1255.83	12.1478	1650.4	740.763	0.459613	AARSD1	Mus musculus alanyl-tRNA synthetase domain containing 1 (Aarsd1), mRNA.	2310044P18Rik; 1110069E20Rik; AA589600
1.55202	Aasdh	69.9326	29.4278	108.537	97.6498	0.733705	AASDH	Mus musculus aminoadipate-semialdehyde dehydrogenase (Aasdh), mRNA.	Aasdh; A830035E16
0.903941	Aasdhppt	209.328	21.026	189.22	54.7225	0.836606	AASDHPPT
0.31819	Aass	55.3937	38.52	17.6258	33.7467	0.659109	AASS	Mus musculus aminoadipate-semialdehyde synthase (Aass), nuclear gene encoding mitochondrial protein, mRNA.	Lorsdh; SDH; LKR; LOR; LOR/SDH; LKR/SDH
0.867698	Aatf	174.773	5.90411	151.65	12.7036	0.779931	AATF	Mus musculus apoptosis antagonizing transcription factor (Aatf), mRNA.	4933415H02Rik; 5830465M17Rik; MGC35916; Che-1; Trb
1.19341	Aatk	16315.3	1396.78	19470.8	3816.19	0.272367	AATK	Mus musculus apoptosis-associated tyrosine kinase (Aatk), mRNA.	aatyk1; mKIAA0641; AATYK
0.925639	AB041550	116.571	18.6065	107.903	83.2705	0.935227	AB041550	Mus musculus hypothetical protein, MNCb-4779 (AB041550), mRNA.
1.46375	AB041803	72.0015	8.79829	105.392	116.489	0.78267	AB041803	PREDICTED: Mus musculus cDNA sequence AB041803 (AB041803), misc RNA.
2.54958	AB112350	21.7469	17.6696	55.4453	23.229	0.710748	AB112350	Mus musculus cDNA sequence AB112350 (AB112350), mRNA.	NAPE-PLD; Mbldc1; A530089G06
-0.997723	AB124611	16.753	71.1565	-16.7148	3.03561	0.7424	AB124611	Mus musculus cDNA sequence AB124611 (AB124611), mRNA.	Gm1706
1.38846	AB182283	1609.1	10.7649	2234.17	147.703	0.0748693	AB182283	Mus musculus cDNA sequence AB182283 (AB182283), mRNA.	mKIAA0363; KIAA0363; D230024G13Rik
0.884042	Abat	2329.46	5.46274	2059.34	352.792	0.156442	ABAT	Mus musculus 4-aminobutyrate aminotransferase (Abat), nuclear gene encoding mitochondrial protein, mRNA.	X61497; 9630038C02Rik; I54; AI255750; GABA-T
0.858264	Abca1	906.042	300.363	777.624	505.642	0.762527	ABCA1	Mus musculus ATP-binding cassette, sub-family A (ABC1), member 1 (Abca1), mRNA.	Abc1
0.292038	Abca12	-32.8166	5.26364	-9.58369	5.17935	0.794657	ABCA12	PREDICTED: Mus musculus ATP-binding cassette, sub-family A (ABC1), member 12, transcript variant 3 (Abca12), mRNA.
0.304812	Abca13	-14.7141	1.49973	-4.48504	11.9858	0.908927	ABCA13	Mus musculus ATP-binding cassette, sub-family A (ABC1), member 13 (Abca13), mRNA. XM_922048 XM_922070	9830132L24; A930002G16Rik; AI956815
0.217943	Abca14	-42.3672	12.2989	-9.23363	12.024	0.712971	ABCA14	Mus musculus ATP-binding cassette, sub-family A (ABC1), member 14 (Abca14), mRNA.	4930539G24Rik; 1700110B15Rik
0.619602	Abca15	-5.07012	12.0345	-3.14145	7.61478	0.980198	ABCA15	Mus musculus ATP-binding cassette, sub-family A (ABC1), member 15 (Abca15), mRNA.	4930500I12Rik
0.732918	Abca16	-30.8869	8.93943	-22.6376	18.3143	0.926311	ABCA16	Mus musculus ATP-binding cassette, sub-family A (ABC1), member 16 (Abca16), mRNA.	AY243472
-0.11183	Abca17	-13.044	4.14009	1.45871	4.48978	0.867978	ABCA17	Mus musculus ATP-binding cassette, sub-family A (ABC1), member 17 (Abca17), mRNA.
1.64869	Abca2	45.6175	42.6395	75.2091	25.4037	0.756459	ABCA2	Mus musculus ATP-binding cassette, sub-family A (ABC1), member 2 (Abca2), mRNA.	Abc2; mKIAA1062; AI413825; D2H0S1474E
1.62865	Abca3	253.637	41.5009	413.087	171.577	0.366078	ABCA3	Mus musculus ATP-binding cassette, sub-family A (ABC1), member 3 (Abca3), transcript variant 2, mRNA.	ABC-C; 1810036E22Rik; Abc3; MGC90532
0.594307	Abca4	-36.9923	6.77356	-21.9848	7.80925	0.862203	ABCA4	Mus musculus ATP-binding cassette, sub-family A (ABC1), member 4 (Abca4), mRNA.	D430003I15Rik; Abc10; Abcr; RmP; AW050280
2.4998	Abca5	24.513	15.2128	61.2777	56.2211	0.679694	ABCA5	Mus musculus ATP-binding cassette, sub-family A (ABC1), member 5 (Abca5), mRNA.	mKIAA1888; B930033A02Rik; ABC13
-2.89696	Abca6	-3.36895	9.21421	9.75971	9.68047	0.881263	ABCA6	Mus musculus ATP-binding cassette, sub-family A (ABC1), member 6 (Abca6), mRNA.	6330565N06Rik
2.11404	Abca7	77.3166	4.21616	163.451	107.914	0.691215	ABCA7	Mus musculus ATP-binding cassette, sub-family A (ABC1), member 7 (Abca7), mRNA.	ABCX; Abc51
-2.01865	Abca8a	-5.57165	58.913	11.2472	52.2989	0.871307	ABCA8A	Mus musculus ATP-binding cassette, sub-family A (ABC1), member 8a (Abca8a), mRNA.
1.55099	Abca8b	724.906	13.3054	1124.32	904.319	0.738793	ABCA8B	Mus musculus ATP-binding cassette, sub-family A (ABC1), member 8b (Abca8b), mRNA.	Abca8
0.626536	Abca9	256.844	75.3623	160.922	187.997	0.573189	ABCA9	Mus musculus ATP-binding cassette transporter sub-family A member 9 (Abca9), mRNA.	D630040K07Rik
0.232889	Abcb10	-58.8424	4.71487	-13.7037	1.61197	0.612446	ABCB10	Mus musculus ATP-binding cassette, sub-family B (MDR/TAP), member 10 (Abcb10), nuclear gene encoding mitochondrial protein, mRNA.	AU016331; Abcb12; C76534; Abc-me
0.427698	Abcb11	-31.2616	12.7898	-13.3705	3.39293	0.841048	ABCB11	Mus musculus ATP-binding cassette, sub-family B (MDR/TAP), member 11 (Abcb11), mRNA.	Bsep; ABC16; PFIC2; Lith1; SPGP; PGY4
0.677978	Abcb1a	-39.4788	17.1721	-26.7657	21.4974	0.887352	ABCB1A	Mus musculus ATP-binding cassette, sub-family B (MDR/TAP), member 1A (Abcb1a), mRNA.	Mdr1a; MDR3; Pgp; Evi32; Abcb4; Pgy-3; P-gp; mdr-3; Pgy3
2.27441	Abcb1b	36.4936	18.4041	83.0013	36.9366	0.614517	ABCB1B	Mus musculus ATP-binding cassette, sub-family B (MDR/TAP), member 1B (Abcb1b), mRNA.	Pgy-1; Mdr1; Abcb1; mdr; Pgy1; Mdr1b
2.18384	Abcb4	33.6044	7.47113	73.3867	71.4208	0.696273	ABCB4	Mus musculus ATP-binding cassette, sub-family B (MDR/TAP), member 4 (Abcb4), mRNA.	mdr-2; Mdr2; Pgy2; Pgy-2
1.37776	Abcb6	128.702	11.95	177.321	3.02159	0.609846	ABCB6	Mus musculus ATP-binding cassette, sub-family B (MDR/TAP), member 6 (Abcb6), nuclear gene encoding mitochondrial protein, mRNA.	1200005B17Rik
1.78091	Abcb8	80.8656	17.9481	144.015	47.9787	0.521037	ABCB8	Mus musculus ATP-binding cassette, sub-family B (MDR/TAP), member 8 (Abcb8), nuclear gene encoding mitochondrial protein, mRNA.	AA409895; 4833412N02Rik
1.0637	Abcb9	489.443	69.2843	520.62	69.8368	0.773222	ABCB9
0.322768	Abcc1	-26.1097	13.5552	-8.42737	21.388	0.843477	ABCC1	Mus musculus ATP-binding cassette, sub-family C (CFTR/MRP), member 1 (Abcc1), mRNA.	Abcc1b; Mrp1; Abcc1a; MRP; Mdrap
1.04421	Abcc10	17.4773	1.81077	18.2499	47.4116	0.946322	ABCC10	Mus musculus ATP-binding cassette, sub-family C (CFTR/MRP), member 10 (Abcc10), transcript variant mrp7A, mRNA.	Mrp7; mFLJ00002
1.1783	Abcc12	-29.3234	31.127	-34.5517	10.2336	0.954168	ABCC12	Mus musculus ATP-binding cassette, sub-family C (CFTR/MRP), member 12 (Abcc12), mRNA.	MRP9; 4930467B22Rik
1.25586	Abcc2	-12.7904	5.98	-16.0631	8.95768	0.967993	ABCC2	Mus musculus ATP-binding cassette, sub-family C (CFTR/MRP), member 2 (Abcc2), mRNA.	AI173996; Abc30; Cmoat; cMRP; Mrp2
0.0804608	Abcc3	66.462	105.624	5.34759	14.9982	0.598659	ABCC3	Mus musculus ATP-binding cassette, sub-family C (CFTR/MRP), member 3 (Abcc3), mRNA.	MRP3; MLP2; ABC31; MOAT-D; 1700019L09Rik
1.61513	Abcc5	632.056	2.41288	1020.85	500.429	0.233649	ABCC5	Mus musculus ATP-binding cassette, sub-family C (CFTR/MRP), member 5 (Abcc5), transcript variant 1, mRNA.	MGC116567; Abcc5a; AI132311; Abcc5b; 2900011L11Rik; Mrp5
3.53929	Abcc6	17.007	43.392	60.1927	59.2311	0.671527	ABCC6	Mus musculus ATP-binding cassette, sub-family C (CFTR/MRP), member 6 (Abcc6), mRNA.	Abcc1b; Mrp6
1.79584	Abcc8	116.28	12.518	208.821	145.726	0.496586	ABCC8	Mus musculus ATP-binding cassette, sub-family C (CFTR/MRP), member 8 (Abcc8), mRNA.	SUR1; Sur; D930031B21Rik
0.356754	Abcc9	-18.7367	3.32082	-6.6844	7.67726	0.887194	ABCC9	Mus musculus ATP-binding cassette, sub-family C (CFTR/MRP), member 9 (Abcc9), transcript variant 2, mRNA.	AI414027; AI449286; SUR2B; Sur2; SUR2A
0.585805	Abcd1	89.4581	51.5588	52.405	5.72255	0.702579	ABCD1	Mus musculus ATP-binding cassette, sub-family D (ALD), member 1 (Abcd1), mRNA. XM_973409	Ald; ALDP; Aldgh
0.571558	Abcd2	476.233	3.3953	272.195	33.3646	0.0451227	ABCD2	Mus musculus ATP-binding cassette, sub-family D (ALD), member 2 (Abcd2), mRNA.	ALDR; ABC39; ALDL1; ALDRP
0.761985	Abcd3	2016.69	73.0457	1536.68	117.152	0.0268648	ABCD3	Mus musculus ATP-binding cassette, sub-family D (ALD), member 3 (Abcd3), mRNA.	AU018866; Pxmp1; AI313901; PMP68; AW146054; PMP70
1.19739	Abcd4	49.7882	13.1585	59.6161	9.17006	0.901484	ABCD4	Mus musculus ATP-binding cassette, sub-family D (ALD), member 4 (Abcd4), mRNA.	P69r; P70R; Pxmp1l
1.09322	Abce1	1134.99	170.327	1240.78	81.5371	0.617667	ABCE1	Mus musculus ATP-binding cassette, sub-family E (OABP), member 1 (Abce1), mRNA.	C79080; Rnaseli; Oabp; RNS41; RLI
1.2467	Abcf1	380.781	62.364	474.718	211.649	0.706675	ABCF1	Mus musculus ATP-binding cassette, sub-family F (GCN20), member 1 (Abcf1), mRNA.	AU041969; D17Wsu166e; Abc50; GCN20
1.32139	Abcf2	829.749	8.94317	1096.42	340.743	0.409439	ABCF2	Mus musculus ATP-binding cassette, sub-family F (GCN20), member 2 (Abcf2), nuclear gene encoding mitochondrial protein, mRNA.	E430001O06; 0710005O05Rik; Drr3
1.37417	Abcf3	1623.69	96.789	2231.23	437.127	0.064379	ABCF3	Mus musculus ATP-binding cassette, sub-family F (GCN20), member 3 (Abcf3), mRNA.	AI326318; BB119416; AU016058
1.24893	Abcg1	118.747	13.411	148.307	53.7552	0.759916	ABCG1
0.453143	Abcg2	70.943	18.9181	32.1473	3.19049	0.668213	ABCG2	Mus musculus ATP-binding cassette, sub-family G (WHITE), member 2 (Abcg2), mRNA.	BCRP; Bcrp1; MXR; ABC15; ABCP; AI428558; MXR1
0.671704	Abcg3	-30.116	3.00459	-20.229	12.7966	0.911651	ABCG3	Mus musculus ATP-binding cassette, sub-family G (WHITE), member 3 (Abcg3), mRNA.	Mxr2; Abcp2
1.77381	Abcg4	322.241	40.4206	571.597	166.739	0.0956524	ABCG4	Mus musculus ATP-binding cassette, sub-family G (WHITE), member 4 (Abcg4), mRNA. XM_989296 XM_989324	6430517O04Rik
0.600584	Abcg5	-38.0366	14.4548	-22.8442	8.03705	0.864515	ABCG5	Mus musculus ATP-binding cassette, sub-family G (WHITE), member 5 (Abcg5), mRNA.	MGC123400; Sterolin-1; AW112016; sterolin 1
0.632593	Abcg8	-38.5225	8.59465	-24.3691	0.0413654	0.873666	ABCG8	Mus musculus ATP-binding cassette, sub-family G (WHITE), member 8 (Abcg8), mRNA.	1300003C16Rik; Sterolin-2; sterolin 2; AI114946
3.68127	Abhd1	17.4575	12.7035	64.2658	3.59661	0.599724	ABHD1	Mus musculus abhydrolase domain containing 1 (Abhd1), transcribed RNA.	LABH-1; LABH1
0.219983	Abhd10	-11.1918	2.40562	-2.46199	30.5612	0.923518	ABHD10	Mus musculus abhydrolase domain containing 10 (Abhd10), mRNA.	D630018L06; D230019K24Rik
1.18239	Abhd11	337.15	15.8105	398.642	116.946	0.615755	ABHD11	Mus musculus abhydrolase domain containing 11 (Abhd11), mRNA.	Wbscr21; 1110054D16Rik; A630008N09Rik
0.664466	Abhd12	550.486	34.3091	365.779	90.7081	0.100369	ABHD12	Mus musculus abhydrolase domain containing 12 (Abhd12), mRNA.	AI431047; 6330583M11Rik; AW547313
1.1928	Abhd14a	111.158	23.4415	132.589	39.9363	0.819258	ABHD14A	Mus musculus abhydrolase domain containing 14A (Abhd14a), mRNA.	1110013B16Rik; Dorz1; AW558221
1.28142	Abhd14b	160.475	29.1163	205.636	123.358	0.718599	ABHD14B	Mus musculus abhydrolase domain containing 14b (Abhd14b), mRNA.	1810013B01Rik
0.694084	Abhd2	581.724	32.5116	403.765	44.4073	0.117369	ABHD2	Mus musculus abhydrolase domain containing 2 (Abhd2), mRNA.	Labh-2; 2210009N18Rik; LABH2; MGC107122
0.437719	Abhd3	654.382	136.002	286.435	137.881	0.0236184	ABHD3	Mus musculus abhydrolase domain containing 3 (Abhd3), mRNA.	LABH3; AA675331
0.427624	Abhd4	335.398	124.076	143.424	20.1746	0.132552	ABHD4	Mus musculus abhydrolase domain containing 4 (Abhd4), mRNA.	1110035H23Rik; AI429574
0.567672	Abhd5	315.023	107.63	178.83	15.6145	0.260257	ABHD5	Mus musculus abhydrolase domain containing 5 (Abhd5), mRNA.	IECN5; 2010002J10Rik; CDS; NCIE2; CGI-58; 1300003D03Rik
0.598851	Abhd6	273.471	77.87	163.768	39.7289	0.311822	ABHD6	Mus musculus abhydrolase domain containing 6 (Abhd6), mRNA.	AA673485; AV065425; 0610041D24Rik
0.507115	Abhd7	441.045	41.7324	223.66	52.6218	0.0499429	ABHD7	Mus musculus abhydrolase domain containing 7 (Abhd7), mRNA.	Gm1382; Ephxrp
0.973059	Abhd8	447.399	7.10466	435.345	302.373	0.958655	ABHD8	Mus musculus abhydrolase domain containing 8 (Abhd8), mRNA.	AB030191; 0910001L24Rik
0.965166	Abi1	1663.93	87.8085	1605.97	244.692	0.784764	ABI1	Mus musculus abl-interactor 1 (Abi1), transcript variant 1, mRNA.	NAP1; E3B1; MGC6064; Ssh3bp1
1.0172	Abi2	1655.8	3.60261	1684.27	159.671	0.92448	ABI2	Mus musculus abl-interactor 2 (Abi2), mRNA.	AI839867; 8430425M24Rik; C130078H13; MGC90855; MGC90836
0.274456	Abi3	660.334	288.861	181.233	77.6062	0.0363661	ABI3
2.69647	Abi3bp	77.3269	36.6516	208.51	35.8387	0.173152	ABI3BP	Mus musculus ABI gene family, member 3 (NESH) binding protein (Abi3bp), transcript variant 1, mRNA.	D930038M13Rik; BG172926; TARSH; 5033411B22Rik; AI506287
0.514334	Abl1	209.26	29.2328	107.629	56.9643	0.344405	ABL1	Mus musculus v-abl Abelson murine leukemia oncogene 1 (Abl1), mRNA.	MGC117749; AI325092; c-Abl; Abl; E430008G22Rik
1.09041	Ablim1	214.787	34.9487	234.205	45.5214	0.791886	ABLIM1	Mus musculus actin-binding LIM protein 1 (Ablim1), mRNA.	mKIAA0059; Limab1; abLIM-M; AW060987; abLIM-L; 2210411C18Rik; 2610209L21Rik; abLIM-S; 9330196J19Rik; 4833406P10Rik; AW215784; AV079770
1.79117	Ablim2	412.595	42.5916	739.029	183.743	0.0641678	ABLIM2	Mus musculus actin-binding LIM protein 2 (Ablim2), mRNA.	C230091L11; AI606905
1.89446	Ablim3	90.0227	18.4349	170.545	61.491	0.408852	ABLIM3	Mus musculus actin binding LIM protein family, member 3 (Ablim3), mRNA.	MGC69876; AW990719; KIAA0843; D930036B08Rik
0.522936	Abo	23.9123	1.48335	12.5046	17.8636	0.890281	ABO	Mus musculus ABO blood group (transferase A, alpha 1-3-N-acetylgalactosaminyltransferase, transferase B, alpha 1-3-galactosyltransferase) (Abo), mRNA.
1.83293	Abp1	30.1461	1.5418	55.2557	59.6431	0.79786	ABP1	Mus musculus amiloride binding protein 1 (amine oxidase, copper-containing) (Abp1), mRNA.	1600012D06Rik; DAO
0.0371034	Abpa	-27.2864	0.643421	-1.01242	0.148595	0.768923	ABPA	Mus musculus androgen binding protein alpha (Abpa), mRNA.	Abp; Tcp; Sal-1
0.843425	Abpb	118.08	0.417584	99.5918	72.3886	0.897162	ABPB	Mus musculus androgen binding protein beta (Abpb), mRNA.
-0.133133	Abpe	-14.7292	2.848	1.96094	20.391	0.852124	ABPE	Mus musculus androgen binding protein epsilon (Abpe), mRNA.	lacrimal
0.894087	Abpg	-48.5641	7.03749	-43.4205	14.7962	0.945562	ABPG	Mus musculus androgen binding protein gamma (Abpg), mRNA.	Scgb2b4; MGC130244; MGC130243; C2d
0.927262	Abpz	-46.2655	12.3691	-42.9003	23.4235	0.970084	ABPZ	Mus musculus androgen binding protein zeta (Abpz), mRNA.	C2b; Scgb2b3
1.13963	Abr	650.373	10.2515	741.187	225.374	0.638104	ABR	Mus musculus active BCR-related gene (Abr), transcript variant 1, mRNA.	AU042359; 6330400K15Rik
1.55984	Abra	32.7845	34.0471	51.1388	116.278	0.880936	ABRA	Mus musculus actin-binding Rho activating protein (Abra), mRNA.	C130068O12Rik; STARS
0.509085	Abt1	121.426	23.0873	61.8163	36.5715	0.520628	ABT1	Mus musculus activator of basal transcription (Abt1), mRNA.
0.96829	Abtb1	362.705	6.86217	351.203	69.9265	0.912798	ABTB1	Mus musculus ankyrin repeat and BTB (POZ) domain containing 1 (Abtb1), mRNA.	BPOZ; MGC7237; BC003234; AI847549; EF1ABP
0.725142	Abtb2	85.3447	16.5877	61.8871	0.875169	0.797223	ABTB2	Mus musculus ankyrin repeat and BTB (POZ) domain containing 2 (Abtb2), mRNA.	AW539457
1.19837	Acaa1a	4588.08	321.531	5498.2	772.368	0.170917	ACAA1A	Mus musculus acetyl-Coenzyme A acyltransferase 1A (Acaa1a), mRNA.	D9Ertd25e; PTL; Acaa1; MGC7090; Acaa
1.24136	Acaa1b	71.9872	49.128	89.3622	42.5226	0.860583	ACAA1B	Mus musculus acetyl-Coenzyme A acyltransferase 1B (Acaa1b), mRNA.	MGC29978
0.321642	Acaa2	105.83	14.4435	34.0394	4.26709	0.284346	ACAA2	Mus musculus acetyl-Coenzyme A acyltransferase 2 (mitochondrial 3-oxoacyl-Coenzyme A thiolase) (Acaa2), mRNA.	AI255831; D18Ertd240e; AI265397; 0610011L04Rik
-0.365972	Acad10	-7.14374	1.90444	2.61441	7.57955	0.900517	ACAD10	Mus musculus acyl-Coenzyme A dehydrogenase family, member 10 (Acad10), mRNA.	2410021P16Rik
0.810685	Acad8	171.671	27.2154	139.171	17.8214	0.735143	ACAD8	Mus musculus acyl-Coenzyme A dehydrogenase family, member 8 (Acad8), mRNA.	AI786953; 2310016C19Rik
1.10178	Acad9	119.05	14.4845	131.167	43.9951	0.89647	ACAD9
0.509755	Acadl	91.1957	26.3961	46.4875	1.6508	0.630598	ACADL	Mus musculus acyl-Coenzyme A dehydrogenase, long-chain (Acadl), mRNA.	AA960361; LCAD; C79855; AU018452
0.867583	Acadm	524.473	32.355	455.024	20.0967	0.536699	ACADM	Mus musculus acyl-Coenzyme A dehydrogenase, medium chain (Acadm), mRNA.	AU018656; MCAD
0.710372	Acads	302.245	131.631	214.707	22.5921	0.726787	ACADS	Mus musculus acyl-Coenzyme A dehydrogenase, short chain (Acads), nuclear gene encoding mitochondrial protein, mRNA.	SCAD; Bcd-1; AI196007; Bcd1
1.26692	Acadsb	1584.09	247.574	2006.91	225.867	0.166785	ACADSB	Mus musculus acyl-Coenzyme A dehydrogenase, short/branched chain (Acadsb), nuclear gene encoding mitochondrial protein, mRNA.	1300003O09Rik; BB066609
0.959088	Acadvl	917.51	21.7226	879.973	5.26393	0.798869	ACADVL	Mus musculus acyl-Coenzyme A dehydrogenase, very long chain (Acadvl), mRNA.	vlcad
1.80043	Acan	39.4236	37.058	70.9795	48.5872	0.752569	ACAN	Mus musculus aggrecan (Acan), mRNA.	Cspg1; cmd; Agc1; Agc
0.998796	Acap3	214.816	3.89179	214.557	44.8819	0.961759	ACAP3	Mus musculus ArfGAP with coiled-coil, ankyrin repeat and PH domains 3 (Acap3), mRNA.	mKIAA1716; Kiaa1716-hp
1.03382	Acat1	218.736	43.6703	226.135	47.2803	0.941539	ACAT1
1.08787	Acat2	738.308	38.1985	803.186	279.057	0.766764	ACAT2	Mus musculus acetyl-Coenzyme A acetyltransferase 2 (Acat2), mRNA.	AW742799; Tcp1-rs1; Tcp-1x
0.0716459	Acat3	-26.2088	22.2002	-1.87775	46.4044	0.797575	ACAT3
0.818252	Acbd3	865.273	59.6195	708.011	140.98	0.258755	ACBD3	Mus musculus acyl-Coenzyme A binding domain containing 3 (Acbd3), mRNA.	GOLPH1; Gocap1; D1Ertd10e; 8430407O11Rik; 60kDa; Pap7; GCP60
1.271	Acbd4	194.024	64.7337	246.603	70.5375	0.675985	ACBD4	Mus musculus acyl-Coenzyme A binding domain containing 4 (Acbd4), transcript variant 1, mRNA.	2010015A21Rik; 2010009P05Rik; AI849317
0.552171	Acbd5	677.12	133.634	373.886	48.1296	0.0442245	ACBD5	Mus musculus acyl-Coenzyme A binding domain containing 5 (Acbd5), mRNA.	1300014E15Rik; MGC90942
1.30039	Acbd6	692.739	18.2102	900.832	276.99	0.337993	ACBD6	Mus musculus acyl-Coenzyme A binding domain containing 6 (Acbd6), mRNA.	MGC144462; 2610100E10Rik; MGC106946; MGC144461; 0610010G04Rik
1.86166	Accn1	168.018	30.7012	312.793	134.169	0.420779	ACCN1	Mus musculus amiloride-sensitive cation channel 1, neuronal (degenerin) (Accn1), transcript variant 1, mRNA.	ACIC2; BNC1; Mdeg; BNaC1a; ASIC2
1.98778	Accn2	385.906	17.0983	767.095	290.68	0.0898119	ACCN2	Mus musculus amiloride-sensitive cation channel 2, neuronal (Accn2), mRNA.	AI843610; ASIC1a; BNaC2; B530003N02Rik; ASIC1; ASIC1 beta; ASIC; ASICalpha
-2.60163	Accn3	-8.21216	3.00657	21.365	0.650207	0.747142	ACCN3	Mus musculus amiloride-sensitive cation channel 3 (Accn3), mRNA.	ASIC3; AW742291; TNAC1; SLNAC1; DRASIC
0.139807	Accn4	39.7237	2.74345	5.55366	6.12842	0.703666	ACCN4	Mus musculus amiloride-sensitive cation channel 4, pituitary (Accn4), mRNA.	Asic4; BNAC4
0.398349	Accn5	-57.0458	7.45903	-22.7242	18.8373	0.70026	ACCN5	Mus musculus amiloride-sensitive cation channel 5, intestinal (Accn5), mRNA.	Inac; Blinac
2.00024	Accs	153.232	14.707	306.5	153.32	0.274838	ACCS	Mus musculus 1-aminocyclopropane-1-carboxylate synthase homolog (Arabidopsis)(non-functional) (Accs), mRNA.	Phacs; RP23-290E9.2; MGC48140
1.212	Acd	945.797	6.72575	1146.31	99.8839	0.240115	ACD	Mus musculus adrenocortical dysplasia (Acd), mRNA.
1.57769	Ace	138.573	2.38308	218.626	66.2027	0.41897	ACE	Mus musculus angiotensin I converting enzyme (peptidyl-dipeptidase A) 1 (Ace), transcript variant 1, mRNA.	MGC117827; CD143; AW208573
0.843367	Ace2	-41.2493	20.2556	-34.7882	23.2337	0.942948	ACE2	Mus musculus angiotensin I converting enzyme (peptidyl-dipeptidase A) 2 (Ace2), mRNA.	2010305L05Rik
1.95778	Ache	116.424	29.1149	227.933	175.442	0.46688	ACHE	Mus musculus acetylcholinesterase (Ache), mRNA.	mE1c; mE1a; mE1c-long; mE1d; mE1b; mE1d'; mE1e
1.71132	Acin1	247.265	25.0415	423.15	8.9863	0.123689	ACIN1	Mus musculus apoptotic chromatin condensation inducer 1 (Acin1), transcript variant 1, mRNA.	2610036I19Rik; acinusL; 2610510L13Rik; mKIAA0670; acinusS; ACN; C79325; Acinus
1.14361	Acly	4151.86	67.9289	4748.12	1006.58	0.414952	ACLY	Mus musculus ATP citrate lyase (Acly), mRNA.	AW538652; A730098H14Rik
0.559375	Acn9	325.075	25.0737	181.839	88.4798	0.192336	ACN9	Mus musculus ACN9 homolog (S. cerevisiae) (Acn9), mRNA.	4933430A16Rik; 0610005M07Rik
1.03219	Acnat2	-48.4836	5.12082	-50.0442	30.1045	0.986893	ACNAT2	Mus musculus acyl-coenzyme A amino acid N-acyltransferase 2 (Acnat2), mRNA.
1.42999	Aco1	59.5986	55.5498	85.2251	9.93536	0.795629	ACO1	Mus musculus aconitase 1 (Aco1), mRNA.	Irp1; Aco-1; Irebp; AI256519
1.03971	Aco2	2282.43	18.3469	2373.07	541.039	0.821366	ACO2	Mus musculus aconitase 2, mitochondrial (Aco2), nuclear gene encoding mitochondrial protein, mRNA.	D10Wsu183e; Aco-2; Aco3
0.547474	Acot1	491.059	85.8742	268.842	44.1802	0.112831	ACOT1	Mus musculus acyl-CoA thioesterase 1 (Acot1), mRNA.	CTE-I; ACH2; Cte1; D12Ucla1; CTE-1
1.85313	Acot10	116.511	37.1293	215.909	27.0118	0.297059	ACOT10	Mus musculus acyl-CoA thioesterase 10 (Acot10), mRNA.	MGC124133; MT-ACT48; p48; MGC124134; Acate3
0.484429	Acot11	523.242	105.036	253.474	87.3259	0.0488857	ACOT11	Mus musculus acyl-CoA thioesterase 11 (Acot11), mRNA.	BFIT1; Them1; AW060409; BFIT; Thea; mKIAA0707; MGC25974; 2010309H15Rik; 1110020M10Rik
-0.0603991	Acot12	40.6463	8.18202	-2.455	25.1495	0.633215	ACOT12	Mus musculus acyl-CoA thioesterase 12 (Acot12), mRNA.	AV027244; mCACH-1; 4930449F15Rik; 1300004O04Rik; Cach
0.787093	Acot2	18.1444	10.2715	14.2813	6.10692	0.942063	ACOT2	Mus musculus acyl-CoA thioesterase 2 (Acot2), nuclear gene encoding mitochondrial protein, mRNA.	AA571646; MTE-I; Mte1
-1.83424	Acot3	-16.5444	23.297	30.3464	75.9364	0.652297	ACOT3	Mus musculus acyl-CoA thioesterase 3 (Acot3), mRNA.	PTE-Ia; Pte2a; AW108394
0.744652	Acot4	-74.0059	7.81466	-55.1087	12.6859	0.831011	ACOT4	Mus musculus acyl-CoA thioesterase 4 (Acot4), mRNA.	PTE-Ib; B430212I04Rik; Pte2b; Pte1b
0.641861	Acot5	-60.4189	0.673038	-38.7805	0.280535	0.80735	ACOT5	Mus musculus acyl-CoA thioesterase 5 (Acot5), mRNA.	PTE-Ic; BC016076
0.831481	Acot6	305.829	5.40918	254.291	45.4825	0.605071	ACOT6	Mus musculus acyl-CoA thioesterase 6 (Acot6), mRNA. XM_992672 XM_992697	A330054B07; BE688602; 4632408A20Rik
1.18817	Acot7	2320.12	140.554	2756.7	704.342	0.550507	ACOT7	Mus musculus acyl-CoA thioesterase 7 (Acot7), mRNA.	LACH1; AU015130; AU042212; Bach; ACH1; 2410041A17Rik; ACT; CTE-II; AW557066
1.01145	Acot8	433.696	45.7356	438.663	64.0667	0.869637	ACOT8	Mus musculus acyl-CoA thioesterase 8 (Acot8), mRNA.	Pte1; PTE-2
1.39497	Acot9	506.546	157.36	706.619	237.053	0.361905	ACOT9	Mus musculus acyl-CoA thioesterase 9 (Acot9), mRNA.	MT-ACT48; Acate2; C76421; 0610041P13Rik; p48; U8
1.02578	Acox1	916.308	93.9018	939.929	97.4622	0.883431	ACOX1	Mus musculus acyl-Coenzyme A oxidase 1, palmitoyl (Acox1), mRNA.	D130055E20Rik; AI042784; AOX
0.689262	Acox2	184.878	15.7132	127.429	71.109	0.575208	ACOX2	Mus musculus acyl-Coenzyme A oxidase 2, branched chain (Acox2), mRNA.
1.22607	Acox3	371.971	18.5875	456.064	57.9383	0.427458	ACOX3	Mus musculus acyl-Coenzyme A oxidase 3, pristanoyl (Acox3), mRNA.	PCOX; BI685180; EST-s59
0.544447	Acoxl	-75.8281	11.5484	-41.2844	20.3925	0.698762	ACOXL	Mus musculus acyl-Coenzyme A oxidase-like (Acoxl), mRNA.	1200014P05Rik; AV025673
2.43534	Acp1	10.8956	4.75796	26.5345	9.84856	0.862236	ACP1	Mus musculus acid phosphatase 1, soluble (Acp1), mRNA.	Acp-1; MGC132904; LMW-PTP; MGC103115; AI427468; 4632432E04Rik
0.92325	Acp2	387.657	99.8616	357.904	31.694	0.811481	ACP2	Mus musculus acid phosphatase 2, lysosomal (Acp2), mRNA.	LAP; Acp-2
0.669434	Acp5	459.205	111.634	307.408	42.1511	0.233571	ACP5
5.41579	Acp6	18.0733	12.3744	97.8814	23.0317	0.385634	ACP6	Mus musculus acid phosphatase 6, lysophosphatidic (Acp6), mRNA.	5730559A09Rik; AU022842; ACPL1; mPACPL1
0.976392	Acpl2	374.989	28.577	366.136	64.4963	0.967121	ACPL2	Mus musculus acid phosphatase-like 2 (Acpl2), mRNA.	DKFZp434B2119; BB177120; 9430094M07Rik; C130099A20Rik; MGC38214
1.31616	Acpp	-16.0712	27.3253	-21.1522	6.64968	0.957306	ACPP	Mus musculus acid phosphatase, prostate (Acpp), transcript variant 1, mRNA.	A030005E02Rik; Ppal; Lap; PAP; AI324033
0.668355	Acr	-47.526	7.2432	-31.7642	9.0433	0.8546	ACR	Mus musculus acrosin prepropeptide (Acr), mRNA.	AI323726; MGC124043
-10.3958	Acrbp	-10.8413	7.64622	112.704	6.24528	0.160512	ACRBP	Mus musculus proacrosin binding protein (Acrbp), mRNA.	OY-TES-1; sp32
1.14955	Acrv1	-53.6746	12.5899	-61.7019	16.6301	0.92809	ACRV1	Mus musculus acrosomal vesicle protein 1 (Acrv1), mRNA.	Msa63
0.23457	Acsbg1	451.731	27.7112	105.963	79.8398	0.00136795	ACSBG1	Mus musculus acyl-CoA synthetase bubblegum family member 1 (Acsbg1), mRNA.	R75185; BG1; E230019G03Rik; mKIAA0631; Lpd; Bgm
0.53895	Acsbg2	-42.5282	4.45482	-22.9206	1.38236	0.825667	ACSBG2	Mus musculus acyl-CoA synthetase bubblegum family member 2 (Acsbg2), mRNA.
16.8541	Acsf3	6.00731	10.0078	101.248	115.224	0.428229	ACSF3	Mus musculus acyl-CoA synthetase family member 3 (Acsf3), mRNA.	BB101783; MGC37904
0.773904	Acsl1	561.138	157.045	434.267	113.3	0.435124	ACSL1	Mus musculus acyl-CoA synthetase long-chain family member 1 (Acsl1), mRNA.	FACS; Acs; Facl2; Acas; Acas1
0.805821	Acsl3	2013.18	181.781	1622.26	206.421	0.145978	ACSL3	Mus musculus acyl-CoA synthetase long-chain family member 3 (Acsl3), transcript variant 1, mRNA.	PRO2194; 2610510B12Rik; ACS3; Facl3; C85929
1.4878	Acsl4	353.983	64.4812	526.656	152.161	0.344983	ACSL4	Mus musculus acyl-CoA synthetase long-chain family member 4 (Acsl4), transcript variant 3, mRNA.	AU018108; Facl4; ACS4; 9430020A05Rik; Lacs4
0.984172	Acsl5	875.99	73.3219	862.125	310.604	0.954326	ACSL5	Mus musculus acyl-CoA synthetase long-chain family member 5 (Acsl5), mRNA.	ACS2; 1700030F05Rik; Facl5; ACS5
0.655299	Acsl6	1530.26	183.452	1002.78	263.022	0.0575461	ACSL6	Mus musculus acyl-CoA synthetase long-chain family member 6 (Acsl6), transcript variant 2, mRNA.	MGC36650; AW050338; LACS; mKIAA0837; A330035H04Rik; Facl6; Lacsl
0.708423	Acsm1	-33.5816	8.57946	-23.79	9.96299	0.912434	ACSM1	Mus musculus acyl-CoA synthetase medium-chain family member 1 (Acsm1), mRNA.	Bucs1; Acas3; Macs
0.804325	Acsm2	-73.4707	8.82196	-59.0943	2.24426	0.870902	ACSM2	Mus musculus acyl-CoA synthetase medium-chain family member 2 (Acsm2), nuclear gene encoding mitochondrial protein, mRNA.	BC031140; MGC37245; AI315615
0.471306	Acsm3	105.591	10.8345	49.7659	12.0562	0.509341	ACSM3	Mus musculus acyl-CoA synthetase medium-chain family member 3 (Acsm3), transcript variant 2, mRNA.	Sa; Sah
0.682094	Acsm4	40.808	4.88601	27.8349	24.9001	0.885746	ACSM4	Mus musculus acyl-CoA synthetase medium-chain family member 4 (Acsm4), mRNA.	MGC56918
0.116734	Acsm5	17.6414	11.5611	2.05935	8.94415	0.830155	ACSM5	Mus musculus acyl-CoA synthetase medium-chain family member 5 (Acsm5), mRNA. XM_979651 XM_979684 XM_989322 XM_989384 XM_989414	C730019D22
0.505124	Acss1	1130.81	192.823	571.198	335.732	0.0515531	ACSS1	Mus musculus acyl-CoA synthetase short-chain family member 1 (Acss1), nuclear gene encoding mitochondrial protein, mRNA.	AceCS2; AI788978; 1110032O15Rik; Acas2l; Acas2
1.04855	Acss2	237.078	22.533	248.588	86.9186	0.895789	ACSS2	Mus musculus acyl-CoA synthetase short-chain family member 2 (Acss2), mRNA.	AceCS1; 1110017C11Rik; ACAS; Acs1; Acas2; Acas1
0.558193	Acss3	-75.7973	13.1069	-42.3095	12.9858	0.705624	ACSS3	Mus musculus acyl-CoA synthetase short-chain family member 3 (Acss3), mRNA.	Gm874
-4.52417	Acta1	-3.29219	22.8183	14.8944	0.169003	0.8408	ACTA1	Mus musculus actin, alpha 1, skeletal muscle (Acta1), mRNA.	Acts; AA959943; Actsk-1; Acta-2
0.541825	Acta2	1089.09	270.074	590.094	17.7284	0.026576	ACTA2	Mus musculus actin, alpha 2, smooth muscle, aorta (Acta2), mRNA.	0610041G09Rik; SMalphaA; a-SMA; Actvs
0.796142	Actb	7430.28	256.766	5915.56	25.0771	0.0834103	ACTB	Mus musculus actin, beta (Actb), mRNA.	beta-actin; Actx; E430023M04Rik
0.783258	Actbl2	-63.0814	28.5336	-49.409	26.5407	0.881659	ACTBL2	Mus musculus actin, beta-like 2 (Actbl2), mRNA.
0.437532	Actc1	-42.8239	4.36797	-18.7368	9.4392	0.787281	ACTC1	Mus musculus actin, alpha, cardiac muscle 1 (Actc1), mRNA.	Actc-1
0.994518	Actg2	-19.0626	13.6388	-18.9581	10.5337	0.999065	ACTG2	Mus musculus actin, gamma 2, smooth muscle, enteric (Actg2), mRNA.	SMGA; Act4; ACTA3; Act-4
0.955027	Actl6a	282.599	115.979	269.889	159.532	0.938492	ACTL6A	Mus musculus actin-like 6A (Actl6a), mRNA.	Actl6; C79802; Baf53a; ARP4; 2810432C06Rik; AI851094
0.949575	Actl6b	288.287	4.03763	273.75	79.3561	0.967024	ACTL6B	Mus musculus actin-like 6B (Actl6b), mRNA.	Baf53b; Actl6; ArpNa
0.683881	Actl7a	-46.8572	1.41167	-32.0447	2.12356	0.867632	ACTL7A	Mus musculus actin-like 7a (Actl7a), mRNA.	Tact2
0.597937	Actl7b	-71.8258	9.43522	-42.9473	5.00763	0.744599	ACTL7B	Mus musculus actin-like 7b (Actl7b), mRNA.	MGC151192; Tact1; MGC151194
1.35497	Actn1	400.024	45.372	542.022	31.6339	0.23324	ACTN1	Mus musculus actinin, alpha 1 (Actn1), mRNA.	3110023F10Rik; Actn1a
-0.107249	Actn2	-45.264	17.106	4.85454	12.3483	0.57641	ACTN2	Mus musculus actinin alpha 2 (Actn2), mRNA.	MGC107582; 1110008F24Rik
-3.20925	Actn3	-10.1826	20.1068	32.6784	20.7403	0.651464	ACTN3	Mus musculus actinin alpha 3 (Actn3), mRNA.	MGC132876
1.27454	Actn4	80.1543	19.5588	102.16	86.1598	0.831469	ACTN4	Mus musculus actinin alpha 4 (Actn4), mRNA.	C77391; MGC102374
1.02055	Actr10	2276.37	131.262	2323.15	267.608	0.863857	ACTR10	Mus musculus ARP10 actin-related protein 10 homolog (S. cerevisiae) (Actr10), mRNA.	Arp11; Actr11
1.23073	Actr1a	1073.24	11.2752	1320.87	572.923	0.55263	ACTR1A	Mus musculus ARP1 actin-related protein 1 homolog A, centractin alpha (yeast) (Actr1a), mRNA.	alpha-Arp1; Arp1
1.22217	Actr1b	1370.03	5.72395	1674.41	230.172	0.173879	ACTR1B	Mus musculus ARP1 actin-related protein 1 homolog B, centractin beta (yeast) (Actr1b), mRNA.	AI851923; AA960180; MGC36526; 2310066K23Rik; Arp1b
0.699445	Actr2	2307.5	3.46587	1613.97	237.286	0.0022875	ACTR2	Mus musculus ARP2 actin-related protein 2 homolog (yeast) (Actr2), mRNA.	MGC36604; D6Ertd746e; 4921510D23Rik; Arp2; AA409782
0.653398	Actr3	1810.82	250.538	1183.19	121.111	0.0103564	ACTR3	Mus musculus ARP3 actin-related protein 3 homolog (yeast) (Actr3), mRNA.	1200003A09Rik; Arp3; MGC118188
0.947177	Actr3b	316.287	99.6278	299.58	96.121	0.8988	ACTR3B	Mus musculus ARP3 actin-related protein 3 homolog B (yeast) (Actr3b), mRNA.	9630005C02; Arp3b; MGC91290; Arp3beta; AW047569; ARP11
0.492724	Actr5	-22.4387	12.9431	-11.0561	15.5286	0.89784	ACTR5	Mus musculus ARP5 actin-related protein 5 homolog (yeast) (Actr5), mRNA.	B430109J19Rik; AA545173
1.34608	Actr6	68.8532	2.38871	92.6817	19.5181	0.79577	ACTR6	Mus musculus ARP6 actin-related protein 6 homolog (yeast) (Actr6), mRNA.	AU044443; CDA12; 2010200J04Rik; ArpX; Arp6
1.06427	Actr8	564.737	10.3704	601.034	174.602	0.813962	ACTR8	Mus musculus ARP8 actin-related protein 8 homolog (S. cerevisiae) (Actr8), mRNA.	ARP8; 5730542K05Rik
1.15894	Actrt1	-40.9572	0.266485	-47.4668	20.6287	0.941961	ACTRT1	Mus musculus actin-related protein T1 (Actrt1), mRNA.	1700061J02Rik; MGC144638; MGC144637; Arp-T1
2.44956	Actrt2	12.4436	4.31111	30.4813	12.882	0.841525	ACTRT2	Mus musculus actin-related protein T2 (Actrt2), mRNA.	Arpm2; Arp-T2; 1700052K15Rik
1.30289	Acvr1	270.811	14.616	352.836	26.1609	0.432544	ACVR1	Mus musculus activin A receptor, type 1 (Acvr1), mRNA.	ALK2; Acvr; SKR1; Acvrlk2; Tsk7L; Alk8; ActR-I; Alk-2; ActRIA; D330013D15Rik
1.13721	Acvr1b	180.674	32.7359	205.464	160.352	0.86439	ACVR1B	Mus musculus activin A receptor, type 1B (Acvr1b), mRNA.	SKR2; Acvrlk4; ActR-IB; Alk4; 6820432J04; ActRIB
-0.664741	Acvr1c	11.7639	43.9908	-7.81993	10.8192	0.834912	ACVR1C	Mus musculus activin A receptor, type IC (Acvr1c), mRNA.	ACVRLK7; C230097P10; Alk-7; ALK7
1.126	Acvr2a	152.432	11.2984	171.638	30.9428	0.84009	ACVR2A	Mus musculus activin receptor IIA (Acvr2a), mRNA.	tActRII; ActRIIa; Acvr2
1.88322	Acvr2b	283.545	46.8582	533.977	133.78	0.0599471	ACVR2B	Mus musculus activin receptor IIB (Acvr2b), mRNA.	MGC118477; ActRIIB
-1.04459	Acvrl1	15.5813	44.1894	-16.276	2.34062	0.734369	ACVRL1	Mus musculus activin A receptor, type II-like 1 (Acvrl1), mRNA.	Acvrlk1; Alk1; Alk-1; AI115505; AI427544
1.05416	Acy1	157.304	9.91592	165.824	75.2136	0.934597	ACY1	Mus musculus aminoacylase 1 (Acy1), mRNA.	Acy-1; 1110014J22Rik
0.815638	Acy1l2	80.3422	16.6672	65.5301	55.1472	0.878552	ACY1L2	Mus musculus aminoacylase 1-like 2 (Acy1l2), mRNA.	Gm424
0.426096	Acy3	191.987	43.1176	81.805	79.5296	0.309776	ACY3	Mus musculus aspartoacylase (aminoacylase) 3 (Acy3), mRNA.	Acy-3; HCBP1; AW107362; 0610006H10Rik
0.971478	Acyp1	-6.99092	3.20166	-6.79152	9.54689	0.998221	ACYP1	Mus musculus acylphosphatase 1, erythrocyte (common) type (Acyp1), mRNA.	AI325944; 1110039O14Rik
0.683193	Acyp2	437.949	39.3364	299.204	46.9066	0.179725	ACYP2	Mus musculus acylphosphatase 2, muscle type (Acyp2), mRNA.	2310004B09Rik
2.78403	Ada	14.0998	10.1866	39.2543	40.0871	0.778103	ADA	Mus musculus adenosine deaminase (Ada), mRNA.
0.616132	Adad1	-57.8259	22.0427	-35.6284	22.547	0.806042	ADAD1	Mus musculus adenosine deaminase domain containing 1 (testis specific) (Adad1), mRNA.	Tenr
0.636184	Adal	165.755	5.46076	105.451	29.0997	0.502485	ADAL	Mus musculus adenosine deaminase-like (Adal), mRNA. XM_900859 XM_900862 XM_917792 XM_925262 XM_925265 XM_925269 XM_925272 XM_925275 XM_986097 XM_986134 XM_986169 XM_986201 XM_986236 XM_986298	MGC62428; 4930578F03Rik; MGC63264
1.12995	Adam10	49.6592	10.3548	56.1123	7.48466	0.943453	ADAM10	Mus musculus a disintegrin and metallopeptidase domain 10 (Adam10), mRNA.	kuzbanian; kuz; MADM; 1700031C13Rik
1.79045	Adam11	160.909	16.5614	288.099	33.8918	0.194451	ADAM11	Mus musculus a disintegrin and metallopeptidase domain 11 (Adam11), mRNA.	AW060611; Mdc
0.504352	Adam12	83.9588	42.4702	42.3448	1.57156	0.659948	ADAM12	Mus musculus a disintegrin and metallopeptidase domain 12 (meltrin alpha) (Adam12), mRNA.	M[a]; KIAA4001; mKIAA4001; Mltna
1.0993	Adam15	440.802	2.92844	484.574	79.0862	0.757217	ADAM15	Mus musculus a disintegrin and metallopeptidase domain 15 (metargidin) (Adam15), transcript variant 2, mRNA.	metargidin; MDC15
0.590071	Adam17	1952.17	428.661	1151.92	865.134	0.244983	ADAM17	Mus musculus a disintegrin and metallopeptidase domain 17 (Adam17), mRNA.	CD156b; Tace
0.445185	Adam1b	87.4666	5.50348	38.9388	28.7866	0.491731	ADAM1B	Mus musculus a disintegrin and metallopeptidase domain 1b (Adam1b), mRNA.	Ftna; Adam1
0.444887	Adam2	-62.6399	12.6711	-27.8677	6.9433	0.695619	ADAM2	Mus musculus a disintegrin and metallopeptidase domain 2 (Adam2), mRNA.	AI323749; Ph30-beta; Ftnb
0.734373	Adam21	-45.8771	3.717	-33.6909	24.5954	0.892166	ADAM21	Mus musculus a disintegrin and metallopeptidase domain 21 (Adam21), mRNA.	Adam31
1.41286	Adam22	1167.83	119.799	1649.98	207.188	0.0620321	ADAM22	Mus musculus a disintegrin and metallopeptidase domain 22 (Adam22), transcript variant 1, mRNA.	MDC2; AI854032; 2900022I03Rik
1.03286	Adam23	3821.73	532.101	3947.3	10.2722	0.831915	ADAM23	Mus musculus a disintegrin and metallopeptidase domain 23 (Adam23), mRNA.	MDC3; AW046396
0.833182	Adam24	-18.1253	27.2029	-15.1017	4.45889	0.973382	ADAM24	Mus musculus a disintegrin and metallopeptidase domain 24 (testase 1) (Adam24), mRNA.	Dtgn5
0.462396	Adam25	-48.5096	18.8271	-22.4306	11.3306	0.770594	ADAM25	Mus musculus a disintegrin and metallopeptidase domain 25 (testase 2) (Adam25), mRNA.	4930529F22Rik
0.61947	Adam26a	-45.9787	3.09159	-28.4824	1.3559	0.844569	ADAM26A	Mus musculus a disintegrin and metallopeptidase domain 26A (testase 3) (Adam26a), mRNA.	Dtgn4; Adam26
0.920996	Adam28	-38.674	2.67704	-35.6186	21.1181	0.97072	ADAM28	Mus musculus a disintegrin and metallopeptidase domain 28 (Adam28), transcript variant 1, mRNA.	Dtgn1; C130072N01Rik; MDC-Ls; MDC-Lm; MDCL; D430033C21Rik; eMDCII; MDC-L
0.644348	Adam29	-57.7839	12.8778	-37.233	22.9265	0.816454	ADAM29	Mus musculus a disintegrin and metallopeptidase domain 29 (Adam29), mRNA.
0.668533	Adam3	-52.9503	15.2984	-35.399	18.6856	0.844118	ADAM3	Mus musculus a disintegrin and metallopeptidase domain 3 (cyritestin) (Adam3), mRNA.	Cyrn1; Taz83; MGC150317; tMDC
1.05797	Adam30	45.5073	4.98827	48.1452	74.5505	0.979583	ADAM30	Mus musculus a disintegrin and metallopeptidase domain 30 (Adam30), mRNA.	MGC132801; 4933424D07Rik; MGC132802; svph4
2.32316	Adam32	55.6196	53.6391	129.213	48.339	0.467993	ADAM32	Mus musculus a disintegrin and metallopeptidase domain 32 (Adam32), mRNA.
0.557125	Adam33	126.48	1.93437	70.465	3.12683	0.541448	ADAM33	Mus musculus a disintegrin and metallopeptidase domain 33 (Adam33), mRNA.	Adaml
0.471085	Adam39	-83.5696	15.1113	-39.3684	22.8658	0.622293	ADAM39	Mus musculus a disintegrin and metallopeptidase domain 39 (Adam39), mRNA.	1700056P18Rik
2.25239	Adam4	120.213	12.126	270.767	265.443	0.483619	ADAM4	Mus musculus a disintegrin and metallopeptidase domain 4 (Adam4), mRNA.	AV274654; tMDCV
2.30165	Adam5	-3.86596	17.25	-8.89809	7.46102	0.955157	ADAM5
0.520864	Adam6	-50.6097	4.00617	-26.3608	1.2332	0.785128	ADAM6	Mus musculus a disintegrin and metallopeptidase domain 6 (Adam6), mRNA.	tMDCIV
-0.898829	Adam7	-22.4201	14.4289	20.1518	48.8333	0.653365	ADAM7	Mus musculus a disintegrin and metallopeptidase domain 7 (Adam7), mRNA.	EAPI; EAP1
0.830094	Adam8	-11.7891	24.3366	-9.78603	1.4778	0.981037	ADAM8	Mus musculus a disintegrin and metallopeptidase domain 8 (Adam8), mRNA.	E430039A18Rik; MS2; CD156; CD156a
0.652553	Adam9	369.135	30.2634	240.881	3.21862	0.197393	ADAM9	Mus musculus a disintegrin and metallopeptidase domain 9 (meltrin gamma) (Adam9), mRNA.	MDC9; Mltng; AU020942; mKIAA0021
0.880634	Adamdec1	-30.4108	2.4042	-26.7808	13.8227	0.967469	ADAMDEC1	Mus musculus ADAM-like, decysin 1 (Adamdec1), mRNA.	Dcsn; 2210414L24Rik; AI574231
0.438798	Adamts1	109.853	20.1873	48.2034	28.9008	0.411933	ADAMTS1	Mus musculus a disintegrin-like and metallopeptidase (reprolysin type) with thrombospondin type 1 motif, 1 (Adamts1), mRNA.	METH-1; C3-C5; METH1; ADAM-TS1; ADAMTS
0.982122	Adamts12	-39.2911	8.06575	-38.5886	5.34684	0.993689	ADAMTS12	Mus musculus a disintegrin-like and metallopeptidase (reprolysin type) with thrombospondin type 1 motif, 12 (Adamts12), mRNA.	AI605170; ADAMTS-12
0.524334	Adamts13	206.721	69.7498	108.391	82.6329	0.399391	ADAMTS13	Mus musculus a disintegrin-like and metallopeptidase (reprolysin type) with thrombospondin type 1 motif, 13 (Adamts13), mRNA.	Gm710; vWF-CP
0.652724	Adamts15	293.759	58.8137	191.744	31.8674	0.323383	ADAMTS15	Mus musculus a disintegrin-like and metallopeptidase (reprolysin type) with thrombospondin type 1 motif, 15 (Adamts15), mRNA.
0.865786	Adamts16	105.339	21.8694	91.2008	78.5532	0.892772	ADAMTS16	Mus musculus a disintegrin-like and metallopeptidase (reprolysin type) with thrombospondin type 1 motif, 16 (Adamts16), mRNA.	MGC37086
1.09562	Adamts17	830.564	35.8567	909.984	383.449	0.782339	ADAMTS17	Mus musculus ADAM metallopeptidase with thrombospondin type 1 motif, 17 (Adamts17), mRNA.
2.43442	Adamts18	44.7936	26.6168	109.046	114.784	0.595115	ADAMTS18
0.023818	Adamts19	-52.5209	11.7494	-1.25094	8.99496	0.566035	ADAMTS19	Mus musculus a disintegrin-like and metallopeptidase (reprolysin type) with thrombospondin type 1 motif, 19 (Adamts19), mRNA.	4831407I23Rik; AU015154; D230034E10Rik
2.48834	Adamts2	-16.422	5.07043	-40.8637	15.9817	0.763669	ADAMTS2	Mus musculus a disintegrin-like and metallopeptidase (reprolysin type) with thrombospondin type 1 motif, 2 (Adamts2), mRNA.	PCINP; ADAMTS-3; KIAA4060; mKIAA4060; 4732482M10; hPCPNI; A430089F14; ADAM-TS2
0.508674	Adamts20	51.6859	33.3054	26.2913	1.06191	0.763197	ADAMTS20	Mus musculus a disintegrin-like and metallopeptidase (reprolysin type) with thrombospondin type 1 motif, 20 (Adamts20), mRNA.	ADAMTS-20; bt; ADAMST-20; Adamst20
2.85786	Adamts3	17.9626	43.3776	51.3346	79.5044	0.758454	ADAMTS3	PREDICTED: Mus musculus ADAM metallopeptidase with thrombospondin type 1 motif, 3, transcript variant 1 (Adamts3), mRNA.
0.456331	Adamts4	2254.31	215.749	1028.71	729.599	0.0245444	ADAMTS4
-0.0241058	Adamts7	31.9864	3.4146	-0.771058	6.81039	0.714918	ADAMTS7	Mus musculus a disintegrin-like and metallopeptidase (reprolysin type) with thrombospondin type 1 motif, 7 (Adamts7), mRNA.	ADAM-TS7; ADAMTS7B
0.731112	Adamts8	252.635	73.6743	184.704	27.4508	0.528255	ADAMTS8	Mus musculus a disintegrin-like and metallopeptidase (reprolysin type) with thrombospondin type 1 motif, 8 (Adamts8), mRNA.	METH2; METH-2
0.136769	Adamtsl2	-60.6924	20.6196	-8.30086	8.2851	0.559844	ADAMTSL2	Mus musculus ADAMTS-like 2 (Adamtsl2), mRNA.	A930008K15Rik; tcp-1
0.739249	Adamtsl4	506.641	236.479	374.534	169.817	0.554875	ADAMTSL4	Mus musculus ADAMTS-like 4 (Adamtsl4), mRNA.	MGC28749; Tsrc1
0.569211	Adamtsl5	59.0715	46.82	33.6241	16.923	0.789697	ADAMTSL5	Mus musculus ADAMTS-like 5 (Adamtsl5), transcript variant 2, mRNA.	MGC41037; Thsd6; 2010109H09Rik
1.00824	Adap1	112.109	52.4186	113.033	21.2284	0.968017	ADAP1	Mus musculus ArfGAP with dual PH domains 1 (Adap1), mRNA.	4930431P11Rik; GC1L; p42IP4
0.778973	Adap2	242.627	104.533	189	197.517	0.766617	ADAP2	Mus musculus ArfGAP with dual PH domains 2 (Adap2), mRNA.
2.2105	Adar	177.517	1.48012	392.403	224.337	0.304188	ADAR	Mus musculus adenosine deaminase, RNA-specific (Adar), transcript variant 1, mRNA.	mZaADAR; Adar1; AV242451
1.1232	Adarb1	938.332	180.397	1053.93	95.7699	0.62626	ADARB1	Mus musculus adenosine deaminase, RNA-specific, B1 (Adarb1), transcript variant 3, mRNA.	1700057H01Rik; D10Bwg0447e; AW558573; ADAR2; AW124433; BB220382; RED1
0.841395	Adarb2	176.167	49.3258	148.226	47.1598	0.779979	ADARB2
2.664	Adat1	18.9793	0.588562	50.5609	21.1213	0.706579	ADAT1	Mus musculus adenosine deaminase, tRNA-specific 1 (Adat1), mRNA.	mADAT1; MMADAT1
1.46978	Adc	46.3043	5.56591	68.057	11.5319	0.767581	ADC	Mus musculus arginine decarboxylase (Adc), mRNA.	Odcp; RP23-269B7.4; 4933429I20Rik; B930082O19
1.63531	Adck1	85.3897	36.7555	139.638	55.2683	0.585198	ADCK1	Mus musculus aarF domain containing kinase 1 (Adck1), mRNA.	2610005A10Rik
-0.772915	Adck2	-40.9387	10.9341	31.6422	69.772	0.472686	ADCK2	Mus musculus aarF domain containing kinase 2 (Adck2), mRNA.	BB006057; AA408112
2.15214	Adck4	29.7274	3.01861	63.9774	49.5373	0.718969	ADCK4
2.6607	Adck5	34.5333	21.8054	91.8827	36.4611	0.535787	ADCK5	Mus musculus aarF domain containing kinase 5 (Adck5), mRNA.	MGC69569; A230108P17
0.82173	Adcy1	1441.36	210.578	1184.41	718.193	0.631933	ADCY1	Mus musculus adenylate cyclase 1 (Adcy1), mRNA.	mKIAA4070; D11Bwg1392e; I-AC; brl; KIAA4070; AC1
0.204155	Adcy10	-30.564	39.9491	-6.23979	11.8034	0.793859	ADCY10	Mus musculus adenylate cyclase 10 (Adcy10), mRNA.	sAC; Adcy10; 4931412F17; 4930431D04Rik
1.72341	Adcy2	808.243	112.737	1392.94	504.915	0.1201	ADCY2	Mus musculus adenylate cyclase 2 (Adcy2), mRNA.	MGC47193; mKIAA1060
2.14681	Adcy4	26.5804	43.4625	57.0629	24.5012	0.762715	ADCY4	Mus musculus adenylate cyclase 4 (Adcy4), mRNA.	KIAA4004; mKIAA4004
0.67874	Adcy5	61.0829	14.6006	41.4594	9.10713	0.828672	ADCY5	Mus musculus adenylate cyclase 5 (Adcy5), mRNA.	AW121902; Ac5
3.16808	Adcy6	38.1418	21.623	120.836	8.47405	0.380391	ADCY6	Mus musculus adenylate cyclase 6 (Adcy6), mRNA.	mKIAA0422
1.68443	Adcy7	116.52	13.826	196.271	6.58469	0.3877	ADCY7	Mus musculus adenylate cyclase 7 (Adcy7), transcript variant 1, mRNA.	AA407758; MGC141539
1.51631	Adcy8	213.72	31.8091	324.066	38.2709	0.285938	ADCY8	Mus musculus adenylate cyclase 8 (Adcy8), mRNA.	AW060868; AC8
1.83001	Adcy9	69.1909	2.78329	126.62	50.7225	0.548303	ADCY9	Mus musculus adenylate cyclase 9 (Adcy9), mRNA.	mKIAA0520
3.57211	Adcyap1	822.804	116.949	2939.15	627.037	4.10587e-06	ADCYAP1	Mus musculus adenylate cyclase activating polypeptide 1 (Adcyap1), mRNA.	PACAP
1.26031	Adcyap1r1	615.449	43.8203	775.658	271.873	0.556892	ADCYAP1R1	Mus musculus adenylate cyclase activating polypeptide 1 receptor 1 (Adcyap1r1), transcript variant 1, mRNA.	2900024I10Rik; AI846590; PACAP1-R; PAC1; PAC1R
1.03365	Add1	506.796	9.13625	523.851	56.6214	0.929935	ADD1
-1.44625	Add2	-21.7722	13.5802	31.4881	50.6836	0.58451	ADD2	Mus musculus adducin 2 (beta) (Add2), mRNA.	2900072M03Rik
0.700074	Add3	1977.55	78.801	1384.43	432.977	0.16803	ADD3	Mus musculus adducin 3 (gamma) (Add3), mRNA.	AI463285; R75380
0.258317	Adfp	402.095	213.323	103.868	40.5078	0.0915965	ADFP	Mus musculus adipose differentiation related protein (Adfp), mRNA.	Adrp; ADPH; AA407157
1.02882	Adh1	-29.9835	15.9116	-30.8475	4.52144	0.992186	ADH1	Mus musculus alcohol dehydrogenase 1 (class I) (Adh1), mRNA.	AI194826; ADH-AA; Adh-1-t; Adh-3e; Adh1-e; Adh1-t; Adh3-e; Adh1tl; Adh-1t; Adh-1e; Adh-1
0.797144	Adh4	-56.9848	8.76044	-45.4251	18.149	0.896754	ADH4	Mus musculus alcohol dehydrogenase 4 (class II), pi polypeptide (Adh4), mRNA.	Adh2
0.738823	Adh5	404.061	36.3148	298.529	141.466	0.583331	ADH5	Mus musculus alcohol dehydrogenase 5 (class III), chi polypeptide (Adh5), mRNA.	Adh-5; GSNOR; Adh3
0.880072	Adh7	-56.699	49.2842	-49.8991	4.54456	0.942771	ADH7	Mus musculus alcohol dehydrogenase 7 (class IV), mu or sigma polypeptide (Adh7), mRNA.	Adh3-t; Adh-3t; Adh-3e; Adt-1; Adh4; AI325182; Adh3-e; Adh3; Adh-3
0.702881	Adhfe1	47.1505	6.11839	33.1412	39.5175	0.785356	ADHFE1
0.465666	Adi1	242.663	58.9181	113	56.5185	0.188421	ADI1	Mus musculus acireductone dioxygenase 1 (Adi1), mRNA.	AL024210
0.374304	Adipoq	-37.2629	0.510053	-13.9476	13.3485	0.793747	ADIPOQ	Mus musculus adiponectin, C1Q and collagen domain containing (Adipoq), mRNA.	adipo; Acrp30; GBP28; Acdc; apM1; 30kDa
0.677421	Adipor1	583.973	73.2302	395.596	95.8087	0.123358	ADIPOR1	Mus musculus adiponectin receptor 1 (Adipor1), mRNA.	Paqr1; ACDCR1; 2810031L11Rik; CGI-45
0.73681	Adipor2	1253.82	308.895	923.823	346.297	0.33123	ADIPOR2
0.517943	Adk	780.006	62.4758	403.998	43.4371	0.00201172	ADK	Mus musculus adenosine kinase (Adk), mRNA.	AI255373; Ak; MGC6593; 5033405D03Rik; AI987814; 2310026J05Rik
1.08078	Adm	4.89056	31.9538	5.28561	15.238	0.996564	ADM	Mus musculus adrenomedullin (Adm), mRNA.	AM
0.350317	Adm2	-51.3803	4.19376	-17.9994	4.92285	0.707806	ADM2	Mus musculus adrenomedullin 2 (Adm2), mRNA.	Imdn; Am2
1.17661	Adnp	879.186	19.4575	1034.46	62.1485	0.332428	ADNP	Mus musculus activity-dependent neuroprotective protein (Adnp), mRNA.	mKIAA0784; AA589558
2.86253	Ado	-11.289	22.4961	-32.3153	28.7917	0.817943	ADO	Mus musculus 2-aminoethanethiol (cysteamine) dioxygenase (Ado), mRNA.	MGC73511; MGC67243
0.71135	Adora1	1020.78	72.1974	726.13	125.301	0.0372986	ADORA1	Mus musculus adenosine A1 receptor (Adora1), transcript variant 1, mRNA.	A1AR; A1R; BB176431; AI848715
-15.9497	Adora2a	-2.05584	19.6032	32.7901	7.63983	0.700319	ADORA2A	Mus musculus adenosine A2a receptor (Adora2a), mRNA.	A2AAR; MGC118414; A2aR
-2.08248	Adora2b	13.2681	26.7113	-27.6306	4.60852	0.650817	ADORA2B	Mus musculus adenosine A2b receptor (Adora2b), mRNA.	MGC144574; AI605384; MGC144575; AI480866
-0.130102	Adora3	22.0057	8.83878	-2.86299	12.6063	0.781361	ADORA3	Mus musculus adenosine A3 receptor (Adora3), transcript variant 1, mRNA.	ARA3; 4930578J19Rik; 1700001D09Rik; MGC118217; A3AR; Gpcr2
0.704983	Adpgk	222.145	18.7999	156.608	30.8145	0.535285	ADPGK
1.03195	Adprh	4896.47	152.615	5052.92	443.24	0.794301	ADPRH	Mus musculus ADP-ribosylarginine hydrolase (Adprh), mRNA.	Arh1
1.02352	Adprhl1	121.969	11.4298	124.837	52.0661	0.888636	ADPRHL1	Mus musculus ADP-ribosylhydrolase like 1 (Adprhl1), mRNA.	D330008N11Rik; Arh2
1.63288	Adprhl2	31.6083	23.7442	51.6125	12.6944	0.826874	ADPRHL2	Mus musculus ADP-ribosylhydrolase like 2 (Adprhl2), mRNA.	Arh3; AI836109
1.56791	Adra1a	264.092	26.8605	414.073	24.6888	0.281956	ADRA1A	Mus musculus adrenergic receptor, alpha 1a (Adra1a), mRNA.	[a]1a; Adra1c; MGC130524
-0.823726	Adra1b	15.0717	4.45726	-12.4149	4.465	0.758526	ADRA1B
0.791194	Adra1d	-49.857	4.47318	-39.4466	20.6952	0.907378	ADRA1D	Mus musculus adrenergic receptor, alpha 1d (Adra1d), mRNA.	Spr8; Adra1a; Adra-1; [a]1d; Adra1; alpha1D-AR; Gpcr8
1.14915	Adra2a	933.824	78.1941	1073.1	432.941	0.666512	ADRA2A	Mus musculus adrenergic receptor, alpha 2a (Adra2a), mRNA.	AW122659; alpha2-C10; Adra-2; alpha2A; Adra-2a
0.24075	Adra2b	-38.2471	2.61377	-9.20799	10.8836	0.746849	ADRA2B	Mus musculus adrenergic receptor, alpha 2b (Adra2b), mRNA.	alpha2B; alpha2-C2; [a]2B; Adra-2b
0.835754	Adra2c	262.226	49.7467	219.157	52.6713	0.70111	ADRA2C	Mus musculus adrenergic receptor, alpha 2c (Adra2c), mRNA.	alpha2-C4; Adra-2c; [a]2C; alpha2C
0.717453	Adrb1	293.38	1.72436	210.486	118.558	0.500532	ADRB1	Mus musculus adrenergic receptor, beta 1 (Adrb1), mRNA.	beta-AR; Adrb-1
0.767178	Adrb2	124.969	30.1123	95.8737	68.067	0.77589	ADRB2	Mus musculus adrenergic receptor, beta 2 (Adrb2), mRNA.	Badm; Gpcr7; Adrb-2
1.95267	Adrb3	13.3342	6.33847	26.0372	1.17217	0.887907	ADRB3	Mus musculus adrenergic receptor, beta 3 (Adrb3), mRNA.	Adrb-3
1.3432	Adrbk1	637.283	19.7688	855.999	158.966	0.134222	ADRBK1	Mus musculus adrenergic receptor kinase, beta 1 (Adrbk1), mRNA.	betaARK1; Bark-1; GRK2; Adrbk-1
1.73954	Adrbk2	56.5809	2.07273	98.4249	29.2184	0.627965	ADRBK2	Mus musculus adrenergic receptor kinase, beta 2 (Adrbk2), transcript variant 1, mRNA.	AI851927; Adrbk-2; 4833444A01Rik; GRK3; AW551196; Bark-2
1.54509	Adrm1	290.086	83.4784	448.209	267.4	0.465357	ADRM1	Mus musculus adhesion regulating molecule 1 (Adrm1), mRNA.	AA408205; 2510006J17Rik; Arm1; ARM-1; 1110063P18Rik; AU043535; Gp110
1.98578	Adsl	20.4822	17.9724	40.673	26.722	0.823538	ADSL
0.986943	Adss	927.347	133.308	915.239	11.0163	0.944077	ADSS	Mus musculus adenylosuccinate synthetase, non muscle (Adss), mRNA.	AS; AI314886; Adss2
0.750212	Adssl1	289.444	12.5887	217.144	69.1703	0.505226	ADSSL1	Mus musculus adenylosuccinate synthetase like 1 (Adssl1), mRNA.	Adss1; AI528595; Adss
0.378922	Aebp1	880.551	71.2737	333.66	218.983	0.0031009	AEBP1	Mus musculus AE binding protein 1 (Aebp1), mRNA.	ACLP
1.0755	Aebp2	136.418	2.11667	146.717	4.94693	0.876705	AEBP2	Mus musculus AE binding protein 2 (Aebp2), transcript variant 3, mRNA.	B230313N05Rik
-1.20904	Aen	-20.6075	27.8175	24.9152	41.5209	0.629899	AEN	Mus musculus apoptosis enhancing nuclease (Aen), mRNA.	2700083B06Rik
1.23646	Aes	733.634	110.201	907.11	13.7206	0.28911	AES	Mus musculus amino-terminal enhancer of split (Aes), mRNA.	Grg; Grg5; AL024115
1.45854	AF067061	-18.2282	0.208966	-26.5866	20.1193	0.925542	AF067061	Mus musculus cDNA sequence AF067061 (AF067061), mRNA.
0.696304	AF067063	-64.7104	8.75986	-45.0582	19.4795	0.825618	AF067063	Mus musculus cDNA sequence AF067063 (AF067063), mRNA.	clone L5; clone L2
0.175918	AF251705	74.2994	58.4716	13.0706	15.2111	0.532881	AF251705	Mus musculus cDNA sequence AF251705 (AF251705), mRNA.	CLM4; Cd300c; DIgR1; MAIR-II; Igsf7; Lmir2
1.44448	AF366264	63.7002	41.6306	92.0137	60.6539	0.781106	AF366264	Mus musculus cDNA sequence AF366264 (AF366264), mRNA.	SUSP4; SUMO-1
0.667853	AF529169	-28.476	5.0074	-19.0178	31.2787	0.917209	AF529169	Mus musculus cDNA sequence AF529169 (AF529169), mRNA.	DD1
1.58768	Afap1	43.1157	4.93136	68.4539	9.26075	0.766824	AFAP1	Mus musculus actin filament associated protein 1 (Afap1), mRNA.	AI848729; mKIAA3018; Afap; 9630044L16Rik; 2600003E23Rik
0.441527	Afap1l1	-31.95	2.04204	-14.1068	25.9614	0.843076	AFAP1L1	Mus musculus actin filament associated protein 1-like 1 (Afap1l1), mRNA.	AI173486
7.42295	Afap1l2	2.51017	7.27786	18.6328	9.63917	0.857708	AFAP1L2	Mus musculus actin filament associated protein 1-like 2 (Afap1l2), mRNA.	AU041783; MGC28084; KIAA1914; C86904; mKIAA1914
0.689247	Aff1	259.315	27.6007	178.732	83.8566	0.572307	AFF1	Mus musculus AF4/FMR2 family, member 1 (Aff1), transcript variant 1, mRNA.	Mllt2h; 9630032B01Rik; Rob; Af4; AW319193
3.32074	Aff2	48.7955	6.35107	162.037	48.9937	0.23386	AFF2	Mus musculus AF4/FMR2 family, member 2 (Aff2), mRNA.	Ox19; Fmr2; Oxh
0.958981	Aff4	159.631	82.5266	153.083	74.0715	0.955588	AFF4	Mus musculus AF4/FMR2 family, member 4 (Aff4), mRNA.	MGC107469; Alf4; Laf4l; AF5Q31; MCEF
0.816673	Afg3l1	135.539	49.9341	110.691	4.38042	0.802668	AFG3L1	Mus musculus AFG3(ATPase family gene 3)-like 1 (yeast) (Afg3l1), mRNA.	1700047G05Rik; 3110061K15Rik
1.34015	Afg3l2	537.239	43.5198	719.982	125.243	0.165748	AFG3L2	Mus musculus AFG3(ATPase family gene 3)-like 2 (yeast) (Afg3l2), mRNA.	AW260507; 2310036I02Rik
0.933687	Afm	-44.9256	18.9365	-41.9464	23.2301	0.973634	AFM	Mus musculus afamin (Afm), mRNA.	MGC118711; Alf; alpha-Alb
5.62379	Afmid	5.09491	9.36107	28.6527	20.0538	0.769468	AFMID	Mus musculus arylformamidase (Afmid), mRNA.	formylase; Ammd; Kf; 9030621K19Rik
0.708496	Afp	-61.5221	19.344	-43.5882	14.6817	0.840796	AFP	Mus musculus alpha fetoprotein (Afp), mRNA.
0.954717	Aftph	2113.97	139.222	2018.24	18.5174	0.723397	AFTPH	Mus musculus aftiphilin (Aftph), mRNA.	AU019184; AU018432; 9130023F12Rik; RP23-452C23.3
0.636708	Aga	154.029	27.6499	98.0713	25.2483	0.548511	AGA	Mus musculus aspartylglucosaminidase (Aga), mRNA.	AW060726
1.30623	Agap1	939.559	115.116	1227.28	232.082	0.208909	AGAP1	Mus musculus ArfGAP with GTPase domain, ankyrin repeat and PH domain 1 (Agap1), transcript variant 1, mRNA.	Ggap1; R75364; mKIAA1099
0.921063	Agbl1	200.696	51.3297	184.854	101.737	0.894118	AGBL1	Mus musculus ATP/GTP binding protein-like 1 (Agbl1), mRNA.	EG244071; D430020F16; Nna1-l1
0.435804	Agbl2	-36.2037	14.7091	-15.7777	16.4971	0.818781	AGBL2	Mus musculus ATP/GTP binding protein-like 2 (Agbl2), mRNA.	4930524K04; A430081C19Rik
1.17423	Ager	44.0966	45.9119	51.7794	12.5714	0.89457	AGER	Mus musculus advanced glycosylation end product-specific receptor (Ager), mRNA.	RAGE
0.829915	Agfg1	440.335	5.77164	365.441	23.1017	0.512251	AGFG1	Mus musculus ArfGAP with FG repeats 1 (Agfg1), mRNA.	C130049H11Rik; Rip; RAB; AU045498; D730048C23Rik; C85612
0.895556	Agfg2	147.972	15.8797	132.518	7.90063	0.793852	AGFG2	Mus musculus ArfGAP with FG repeats 2 (Agfg2), transcript variant 1, mRNA.	RABR; MGC7148; A630095P14Rik; MGC61203
0.937163	Aggf1	392.401	42.0862	367.744	5.1516	0.717877	AGGF1	Mus musculus angiogenic factor with G patch and FHA domains 1 (Aggf1), mRNA.	VG5Q; AW112072; 2310029P06Rik; 2010009L17Rik; Peg3
2.78551	Agk	3.17627	23.8904	8.84753	43.1463	0.952042	AGK	Mus musculus acylglycerol kinase (Agk), mRNA.	AI465370; 2610037M15Rik; Mulk
-0.280745	Agpat1	-33.2191	10.1992	9.3261	46.8633	0.651723	AGPAT1	Mus musculus 1-acylglycerol-3-phosphate O-acyltransferase 1 (lysophosphatidic acid acyltransferase, alpha) (Agpat1), mRNA.	1-AGP; 1-AGPAT; AW047140
0.55529	Agpat2	-50.2664	17.4405	-27.9125	1.78055	0.802152	AGPAT2	Mus musculus 1-acylglycerol-3-phosphate O-acyltransferase 2 (lysophosphatidic acid acyltransferase, beta) (Agpat2), mRNA.	LPAAB; BSCL1; AV000834; 2510002J07Rik; LPAAT-beta; BSCL
0.455275	Agpat3	592.831	67.7763	269.901	43.1549	0.00310299	AGPAT3	Mus musculus 1-acylglycerol-3-phosphate O-acyltransferase 3 (Agpat3), mRNA.	AW493985; D10Jhu12e; AW061257
0.888688	Agpat4	7854.6	107.156	6980.29	417.166	0.291317	AGPAT4	Mus musculus 1-acylglycerol-3-phosphate O-acyltransferase 4 (lysophosphatidic acid acyltransferase, delta) (Agpat4), mRNA.	1500003P24Rik
1.71548	Agpat5	34.6276	34.1709	59.4029	49.7861	0.79934	AGPAT5	Mus musculus 1-acylglycerol-3-phosphate O-acyltransferase 5 (lysophosphatidic acid acyltransferase, epsilon) (Agpat5), mRNA.	1110013A05Rik; D8Ertd319e
1.17942	Agpat6	1385.35	46.8274	1633.91	354.502	0.466676	AGPAT6	Mus musculus 1-acylglycerol-3-phosphate O-acyltransferase 6 (lysophosphatidic acid acyltransferase, zeta) (Agpat6), mRNA.	AW545732; Tsarg7; AU041707
1.01458	Agpat9	175.427	15.3975	177.984	97.7916	0.931841	AGPAT9	Mus musculus 1-acylglycerol-3-phosphate O-acyltransferase 9 (Agpat9), transcript variant 1, mRNA.	4933408F15
0.946197	Agps	442.055	18.2693	418.271	93.9337	0.738178	AGPS	Mus musculus alkylglycerone phosphate synthase (Agps), mRNA.	9930035G10Rik; 5832437L22; ADHAPS; ADAP-S; ADPS; ALDHPSY; AW123847; ADAS
0.0773623	Agr2	11.2194	13.7842	0.86796	39.284	0.91107	AGR2	Mus musculus anterior gradient 2 (Xenopus laevis) (Agr2), mRNA.	HAG-2; Agr2h; mAG-2; XAG-2; Gob-4
0.709129	Agr3	-37.6012	11.3305	-26.6641	13.728	0.902177	AGR3	Mus musculus anterior gradient homolog 3 (Xenopus laevis) (Agr3), mRNA.	BCMP11; E030025L21Rik; Gm888
1.76702	Agrn	1761.97	280.627	3113.44	490.149	0.00120103	AGRN	Mus musculus agrin (Agrn), mRNA.	Agrin
-53.9654	Agrp	-0.243182	3.51754	13.1234	18.3009	0.881677	AGRP	Mus musculus agouti related protein (Agrp), mRNA.	Agrt; Art
0.169254	Agt	123.005	36.9558	20.8191	43.2948	0.289212	AGT	Mus musculus angiotensinogen (serpin peptidase inhibitor, clade A, member 8) (Agt), mRNA.	Aogen; AI265500; Serpina8
1.29708	Agtpbp1	713.965	79.8458	926.073	162.625	0.174282	AGTPBP1	Mus musculus ATP/GTP binding protein 1 (Agtpbp1), transcript variant 2, mRNA.	BB114605; Nna1; 1700020N17Rik; MGC90651; 2900054O13Rik; 5730402G09Rik; nmf243; pcd; mKIAA1035; 4930445M19Rik
1.15901	Agtr1a	-36.6696	10.2674	-42.5005	13.7304	0.947632	AGTR1A	Mus musculus angiotensin II receptor, type 1a (Agtr1a), mRNA.	AT2R1A; Agtr-1a; AT2R1; Agtr1; AT1; AI551199; AT1a; MGC37610; Angtr-1a; AG2S; 1810074K20Rik
-2.29194	Agtr1b	8.6083	16.7497	-19.7297	0.368701	0.750907	AGTR1B	Mus musculus angiotensin II receptor, type 1b (Agtr1b), mRNA.	AT2R1B; MGC129325; Angtr-1b; Agtr-1b; AT1B
0.377387	Agtr2	56.9847	3.2011	21.5053	7.24802	0.694144	AGTR2	Mus musculus angiotensin II receptor, type 2 (Agtr2), mRNA.	AW107640; AI316812
0.892456	Agtrap	1671.45	137.545	1491.69	42.1883	0.416521	AGTRAP	Mus musculus angiotensin II, type I receptor-associated protein (Agtrap), mRNA.	Atrap; 3300002E14Rik; AT1R; D4Wsu124e
0.745897	Agxt	-70.1403	20.8821	-52.3174	27.2307	0.844572	AGXT	Mus musculus alanine-glyoxylate aminotransferase (Agxt), mRNA.	Agt1; Agxt1
0.554476	Agxt2	212.322	41.4342	117.728	79.545	0.381789	AGXT2	Mus musculus alanine-glyoxylate aminotransferase 2 (Agxt2), nuclear gene encoding mitochondrial protein, mRNA.	AI663818; AI303810
0.536678	Agxt2l1	536.869	87.5357	288.126	223.454	0.193278	AGXT2L1	Mus musculus alanine-glyoxylate aminotransferase 2-like 1 (Agxt2l1), mRNA.	1300019H02Rik; AI195447
1.56005	Agxt2l2	78.3924	15.2225	122.296	26.9269	0.68267	AGXT2L2	Mus musculus alanine-glyoxylate aminotransferase 2-like 2 (Agxt2l2), mRNA.	2900006B13Rik; RP23-79E13.3
1.74168	Ahctf1	203.096	28.8876	353.728	44.9881	0.149865	AHCTF1	Mus musculus AT hook containing transcription factor 1 (Ahctf1), mRNA.	6230412P20Rik; Elys; AV011447
1.46397	Ahcy	154.312	53.6543	225.908	161.809	0.630907	AHCY	Mus musculus S-adenosylhomocysteine hydrolase (Ahcy), mRNA.	AL024110; MGC118063; SAHH; CuBP; AA987153
0.72121	Ahcyl1	4477.26	714.108	3229.05	633.877	0.0667539	AHCYL1	Mus musculus S-adenosylhomocysteine hydrolase-like 1 (Ahcyl1), mRNA.	Ahcy-rs3; 1110034F20Rik; AA409031; AA414901; DCAL; Irbit
0.781306	Ahdc1	316.949	60.8006	247.634	9.39972	0.513711	AHDC1	Mus musculus AT hook, DNA binding motif, containing 1 (Ahdc1), mRNA.	MGC29331; RP23-125F21.2; D030015G18Rik
2.13053	Ahi1	2510.6	646	5348.91	1165.35	0.00270341	AHI1	Mus musculus Abelson helper integration site (Ahi1), mRNA.	D10Bwg0629e; 1700015F03Rik; Ahi-1
0.630849	Ahnak	1108.43	248.655	699.253	392.564	0.496042	AHNAK	Mus musculus AHNAK nucleoprotein (desmoyokin) (Ahnak), transcript variant 3, mRNA.	2310047C17Rik; AA589382; AV091586; 1110004P15Rik; DY6
0.615727	Ahnak2	121.829	25.7203	75.0132	26.4908	0.612124	AHNAK2	Mus musculus AHNAK nucleoprotein 2 (Ahnak2), mRNA.	Gm1185
0.146462	Ahr	-28.498	11.9145	-4.17388	4.51219	0.785496	AHR	Mus musculus aryl-hydrocarbon receptor (Ahr), mRNA.	Ahre; Ah; Ahh; In
1.72607	Ahrr	53.5011	4.14142	92.3464	42.4459	0.677994	AHRR	Mus musculus aryl-hydrocarbon receptor repressor (Ahrr), mRNA.	mKIAA1234; KIAA1234
0.787306	Ahsa1	703.486	116.533	553.859	126.283	0.317865	AHSA1	Mus musculus AHA1, activator of heat shock protein ATPase homolog 1 (yeast) (Ahsa1), mRNA.	MGC36589; p38; MGC36618; BC023857
2.70749	Ahsa2	234.903	50.032	635.999	94.2017	0.00154425	AHSA2	Mus musculus AHA1, activator of heat shock protein ATPase homolog 2 (yeast) (Ahsa2), mRNA.	RP23-188K3.2; 1110064P04Rik; AI450991; FLJ36626
0.579458	Ahsg	-62.8167	12.8483	-36.3996	1.4628	0.765328	AHSG	Mus musculus alpha-2-HS-glycoprotein (Ahsg), mRNA.	fetuin-A
2.44761	AI118078	41.3776	124.508	101.276	108.329	0.681461	AI118078	Mus musculus expressed sequence AI118078 (AI118078), mRNA.	9630029F15
0.740282	AI132487	195.659	77.8446	144.843	91.2319	0.676855	AI132487	Mus musculus expressed sequence AI132487 (AI132487), mRNA.	HDMCP; AI876593; MGC107675
0.585012	AI182371	-78.1422	21.7987	-45.7141	26.4739	0.721301	AI182371	Mus musculus expressed sequence AI182371 (AI182371), mRNA.	AI046667
1.48051	AI314180	1208.99	43.9823	1789.92	314.004	0.017224	AI314180	Mus musculus expressed sequence AI314180 (AI314180), mRNA.	AW558785; KIAA0368; BB181316; RP23-211P15.1; mKIAA0368
0.561497	AI314976	450.751	42.7535	253.095	58.7203	0.0523869	AI314976	Mus musculus expressed sequence AI314976 (AI314976), mRNA.	AW558560
1.10198	AI316807	658.4	15.926	725.543	187.413	0.678847	AI316807	Mus musculus expressed sequence AI316807 (AI316807), mRNA.	BG694986; EST-c39
2.6946	AI317395	20.5429	18.9034	55.355	12.5085	0.702021	AI317395	Mus musculus expressed sequence AI317395 (AI317395), mRNA.	MGC25869; AI482555
0.755523	AI326477	47.6314	15.0803	35.9866	13.9976	0.897608	AI326477
1.00398	AI413582	699.994	0.842937	702.776	78.1453	0.983092	AI413582	Mus musculus expressed sequence AI413582 (AI413582), mRNA.	MGC41609; AI854251
0.931333	AI413782	302.97	59.5316	282.166	47.869	0.846307	AI413782	Mus musculus expressed sequence AI413782 (AI413782), mRNA.
-2.96062	AI427809	3.631	35.8345	-10.75	19.8685	0.876156	AI427809	Mus musculus expressed sequence AI427809 (AI427809), mRNA.	Gm1659
14.0292	AI428936	10.5496	34.2356	148.003	53.7168	0.162926	AI428936	Mus musculus expressed sequence AI428936 (AI428936), mRNA.	0610012K07Rik; MGC38513
1.79034	AI447904	-21.6226	32.0467	-38.7118	15.1579	0.851245	AI447904	Mus musculus expressed sequence AI447904 (AI447904), mRNA.	4930422C14; MGC130359; MGC130358
0.934932	AI449175	132.049	3.57038	123.457	11.0206	0.92602	AI449175	Mus musculus expressed sequence AI449175 (AI449175), transcript variant 1, mRNA.	C530032E20; mszf62; AW108241
1.05711	AI450540	318.791	7.44056	336.998	62.0566	0.860953	AI450540	Mus musculus expressed sequence AI450540 (AI450540), mRNA.	mKIAA1600
2.35972	AI451557	69.6741	22.7601	164.411	79.4279	0.368313	AI451557	Mus musculus expressed sequence AI451557 (AI451557), mRNA.
1.22154	AI451617	-21.2475	6.74742	-25.9547	31.7577	0.95879	AI451617	Mus musculus expressed sequence AI451617 (AI451617), mRNA.
1.69383	AI467606	39.8696	12.3917	67.5322	67.6859	0.783451	AI467606	Mus musculus expressed sequence AI467606 (AI467606), mRNA.
3.14053	AI480653	7.97588	9.91013	25.0485	25.0105	0.849809	AI480653	Mus musculus expressed sequence AI480653 (AI480653), mRNA.	MGC19367
1.75007	AI504432	231.975	39.8548	405.971	248.008	0.379647	AI504432	PREDICTED: Mus musculus expressed sequence AI504432 (AI504432), misc RNA.
1.25419	AI507495	-4.60127	36.3565	-5.77087	3.66095	0.989896	AI507495
1.07246	AI553587	172.193	64.0739	184.671	45.2245	0.905044	AI553587
1.10877	AI593442	765.531	27.0246	848.798	304.587	0.760223	AI593442	Mus musculus expressed sequence AI593442 (AI593442), transcript variant 1, mRNA.	MGC130101; E130102D23
1.06797	AI595366	84.8928	19.0716	90.6633	61.0239	0.953378	AI595366	Mus musculus expressed sequence AI595366 (AI595366), mRNA.
52.2513	AI595406	1.96266	18.0352	102.551	132.916	0.435958	AI595406	Mus musculus expressed sequence AI595406 (AI595406), mRNA.	MGC62475
0.810188	AI597468	1323.77	26.8296	1072.5	85.2843	0.133708	AI597468	Mus musculus expressed sequence AI597468 (AI597468), mRNA.
0.728444	AI597479	561.677	74.4612	409.15	97.0798	0.215429	AI597479	Mus musculus expressed sequence AI597479 (AI597479), mRNA.
0.990949	AI606181	2585.7	55.3783	2562.29	369.304	0.94217	AI606181	PREDICTED: Mus musculus expressed sequence AI606181 (AI606181), misc RNA.
1.02923	AI646023	323.361	77.1719	332.812	178.138	0.953719	AI646023	Mus musculus expressed sequence AI646023 (AI646023), mRNA.	MGC67483; MGC65625
0.611345	AI661453	137.828	28.0875	84.2605	44.3666	0.577779	AI661453	Mus musculus expressed sequence AI661453 (AI661453), mRNA.
0.315074	AI662250	75.5983	50.994	23.8191	9.58399	0.590717	AI662250	Mus musculus expressed sequence AI662250 (AI662250), mRNA.	Vmac
1.73361	AI747448	17.1717	8.89515	29.7692	6.02337	0.888598	AI747448	Mus musculus expressed sequence AI747448 (AI747448), mRNA.
0.523698	AI747699	124.254	10.31	65.0714	28.3081	0.518124	AI747699	Mus musculus expressed sequence AI747699 (AI747699), mRNA.
1.14858	AI836003	842.068	116.807	967.185	525.245	0.748623	AI836003	Mus musculus expressed sequence AI836003 (AI836003), mRNA.	5630400A08
0.898945	AI837181	477.124	1.7254	428.908	219.255	0.788895	AI837181	Mus musculus expressed sequence AI837181 (AI837181), mRNA.	N28173; Bles03
-2.31014	AI842396	-6.99561	2.46177	16.1609	10.3198	0.796588	AI842396	Mus musculus expressed sequence AI842396 (AI842396), mRNA.	Inca1
1.39755	AI846148	84.915	75.527	118.673	50.7503	0.756135	AI846148	Mus musculus expressed sequence AI846148 (AI846148), mRNA. XM_896219 XM_896224 XM_912777 XM_922495 XM_922500 XM_922504 XM_922508 XM_922513 XM_922518	1700105P06Rik
2.5104	AI847670	127.264	47.8797	319.484	88.3967	0.0884321	AI847670	Mus musculus expressed sequence AI847670 (AI847670), mRNA.	4631428I10
1.39901	AI851790	173.568	25.5955	242.822	91.6912	0.530775	AI851790	Mus musculus expressed sequence AI851790 (AI851790), mRNA.	FAM19A2 TAFA-2; TAFA2; Tafa-2; 6330575M02
1.15603	AI894139	655.607	45.155	757.903	172.633	0.505761	AI894139	Mus musculus expressed sequence AI894139 (AI894139), mRNA.
1.55641	AI931714	315.3	79.7793	490.735	8.25888	0.159337	AI931714	Mus musculus expressed sequence AI931714 (AI931714), mRNA.
-0.302237	AI987692	-29.2825	25.0504	8.85026	28.8515	0.679606	AI987692	Mus musculus expressed sequence AI987692 (AI987692), mRNA.	MGC130607; 9130023H10
0.781625	AI987944	66.5056	28.3162	51.9824	35.4866	0.876311	AI987944
0.743271	Aicda	-69.3466	13.0008	-51.5433	9.44907	0.841318	AICDA	Mus musculus activation-induced cytidine deaminase (Aicda), mRNA.	Aid; Arp2
0.267883	Aif1	1705.85	404.366	456.967	35.801	1.20162e-05	AIF1	Mus musculus allograft inflammatory factor 1 (Aif1), mRNA.	G1; AIF-1; D17H6S50E; AI607846; Iba1
1.06374	Aifm1	423.715	14.3536	450.725	65.717	0.881759	AIFM1	Mus musculus apoptosis-inducing factor, mitochondrion-associated 1 (Aifm1), nuclear gene encoding mitochondrial protein, mRNA.	Hq; AIFsh2; mAIF; Pdcd8; MGC5706; AIF
1.67414	Aifm2	218.811	12.5284	366.32	89.7448	0.309022	AIFM2	Mus musculus apoptosis-inducing factor, mitochondrion-associated 2 (Aifm2), nuclear gene encoding mitochondrial protein, transcript variant 3, mRNA.	PRG3; Amid; D730001I10Rik; 5430437E11Rik
1.90566	Aifm3	225.748	74.6053	430.198	319.501	0.409697	AIFM3	Mus musculus apoptosis-inducing factor, mitochondrion-associated 3 (Aifm3), nuclear gene encoding mitochondrial protein, mRNA.	AI840249; Aifl; 2810401C16Rik
2.19971	Aig1	22.5941	47.4458	49.7004	76.8851	0.802596	AIG1	Mus musculus androgen-induced 1 (Aig1), mRNA.	1500031O19Rik; CGI-103; AV064870; AW413422
0.496986	Aig1-pending	106.133	20.4556	52.7465	51.4511	0.578285	AIG1-PENDING
0.799756	Aim1	-32.6915	14.2733	-26.1452	6.65299	0.941371	AIM1
2.7069	Aim2	19.181	60.2279	51.9209	20.2722	0.742103	AIM2	Mus musculus absent in melanoma 2 (Aim2), mRNA.	Gm1313
0.860051	Aip	1527.77	4.04433	1313.96	397.348	0.47664	AIP	Mus musculus aryl-hydrocarbon receptor-interacting protein (Aip), mRNA.	D19Bwg1412e; Ara9; Xap2; AA408703; AW476050; Fkbp16
0.326852	Aipl1	88.9937	9.2876	29.0877	38.7669	0.519138	AIPL1
0.468925	Aire	35.4312	6.2054	16.6146	4.46584	0.783169	AIRE	Mus musculus autoimmune regulator (autoimmune polyendocrinopathy candidiasis ectodermal dystrophy) (Aire), mRNA.	MGC123375; MGC123374
1.06465	Ak1	740.73	39.7724	788.616	438.334	0.882505	AK1	Mus musculus adenylate kinase 1 (Ak1), mRNA.	B430205N08Rik; Ak-1
-0.308246	AK122525	-4.60019	2.02878	1.41799	7.36925	0.941373	AK122525	Mus musculus cDNA sequence AK122525 (AK122525), mRNA.	mKIAA1553
1.04568	AK129341	34.1904	0.404786	35.7524	41.081	0.986623	AK129341	Mus musculus cDNA sequence AK129341 (AK129341), mRNA.	KIAA1377; mKIAA1377
1.6304	AK162044	76.3254	40.3153	124.441	154.601	0.736455	AK162044	Mus musculus cDNA sequence AK162044 (AK162044), mRNA.	9630025C22
0.8831	Ak2	204.76	15.7232	180.823	84.0375	0.828143	AK2	Mus musculus adenylate kinase 2 (Ak2), transcript variant 2, mRNA.	D4Ertd220e; Ak-2
0.696622	Ak3	1378.91	161.661	960.581	482.216	0.23322	AK3	Mus musculus adenylate kinase 3 (Ak3), nuclear gene encoding mitochondrial protein, mRNA.	AK-3; AI506714; AA407498; Akl3l; Ak3l1; Ak3l; 1700018L02Rik
0.727195	Ak3l1	43.9638	26.6153	31.9703	9.4968	0.89561	AK3L1	Mus musculus adenylate kinase 3-like 1 (Ak3l1), nuclear gene encoding mitochondrial protein, mRNA.	Ak-3; Ak-4; Ak3; D4Ertd274e; Ak4
2.47269	Ak5	122.51	3.75209	302.93	326.3	0.465639	AK5	Mus musculus adenylate kinase 5 (Ak5), mRNA.
1.76252	Akap1	82.7661	6.54708	145.877	35.244	0.490999	AKAP1	Mus musculus A kinase (PRKA) anchor protein 1 (Akap1), nuclear gene encoding mitochondrial protein, transcript variant 2, mRNA.	C76494; AKAP121; C81186; Akap; AKAP84; S-AKAP84
0.860619	Akap10	440.759	98.0792	379.326	73.6538	0.613665	AKAP10	Mus musculus A kinase (PRKA) anchor protein 10 (Akap10), nuclear gene encoding mitochondrial protein, mRNA.	D-AKAP2; B130049N18Rik; 1500031L16Rik
0.89891	Akap12	736.242	49.5738	661.815	233.802	0.695811	AKAP12	Mus musculus A kinase (PRKA) anchor protein (gravin) 12 (Akap12), mRNA.	Srcs5; Tsga12; AI317366; SSeCKS
0.440837	Akap14	117.063	84.8386	51.6055	38.1087	0.550161	AKAP14	Mus musculus A kinase (PRKA) anchor protein 14 (Akap14), mRNA.
1.19059	Akap2	1032.84	19.3811	1229.68	130.519	0.378495	AKAP2	Mus musculus A kinase (PRKA) anchor protein 2 (Akap2), transcript variant 3, mRNA.	AKAP-KL; AI649048; B230340M18Rik; AA959716
23.5674	Akap3	1.03719	28.1243	24.4439	29.6532	0.799715	AKAP3	Mus musculus A kinase (PRKA) anchor protein 3 (Akap3), mRNA.
0.759481	Akap4	-37.5572	3.94655	-28.524	16.4918	0.91922	AKAP4	Mus musculus A kinase (PRKA) anchor protein 4 (Akap4), transcript variant 2, mRNA.	Fsc1; p82
1.66883	Akap6	1341.37	142.437	2238.52	448.677	0.00914824	AKAP6	Mus musculus A kinase (PRKA) anchor protein 6 (Akap6), mRNA.	Akapbeta; AI482140; Akapalpha; MGC73457; PRKA
0.998319	Akap7	740.072	26.5072	738.827	460.259	0.99707	AKAP7	Mus musculus A kinase (PRKA) anchor protein 7 (Akap7), mRNA.	Akap18; 6430401D08; AKAP15; AI662165; BB170514
0.953463	Akap8	739.203	58.6075	704.803	361.488	0.899859	AKAP8	Mus musculus A kinase (PRKA) anchor protein 8 (Akap8), mRNA.	AKAP95; AA673585; 1200016A02Rik; AU015639
2.5418	Akap8l	405.374	86.8004	1030.38	301.039	0.00870337	AKAP8L	Mus musculus A kinase (PRKA) anchor protein 8-like (Akap8l), mRNA.	HAP95; Nakap95
1.41124	Akap9	2649.92	28.7145	3739.67	775.672	0.0805523	AKAP9
0.826424	Akna	145.03	68.2988	119.856	88.0167	0.830811	AKNA	Mus musculus AT-hook transcription factor (Akna), mRNA.	mKIAA1968; AI597013; RP23-340H1.6; MGC116630
0.514219	Akp2	128.663	29.4397	66.1612	22.1216	0.499927	AKP2	Mus musculus alkaline phosphatase 2, liver (Akp2), mRNA.	Akp-2; TNSALP; TNAP
0.673028	Akp3	-59.9774	22.7325	-40.3665	18.001	0.827469	AKP3	Mus musculus alkaline phosphatase 3, intestine, not Mn requiring (Akp3), mRNA.	IAP; Akp-3
0.901116	Akp5	320.84	16.8323	289.114	79.0654	0.765123	AKP5	Mus musculus alkaline phosphatase 5 (Akp5), mRNA.	EAP; C77216; D1Ertd816e
0.774939	Akr1a4	2566.3	174.808	1988.72	589.103	0.200686	AKR1A4	Mus musculus aldo-keto reductase family 1, member A4 (aldehyde reductase) (Akr1a4), mRNA.	2610201A18Rik; Akr1a1
1.23823	Akr1b3	638.459	17.4978	790.56	267.108	0.470231	AKR1B3	Mus musculus aldo-keto reductase family 1, member B3 (aldose reductase) (Akr1b3), mRNA.	Aldor1; Aldr1; Ahr-1; Akr1b1; ALR2; AR; Ahr1
1.7687	Akr1b7	-26.6957	18.1334	-47.2167	12.8826	0.81772	AKR1B7	Mus musculus aldo-keto reductase family 1, member B7 (Akr1b7), mRNA.	MGC107658; Avdp; MVDP
-2.1151	Akr1b8	10.4996	24.5658	-22.2076	25.2633	0.719536	AKR1B8	Mus musculus aldo-keto reductase family 1, member B8 (Akr1b8), mRNA.	Fgrp; Fgfrp; FR-1
0.414914	Akr1c12	-31.8183	8.50227	-13.2018	10.941	0.834697	AKR1C12	Mus musculus aldo-keto reductase family 1, member C12 (Akr1c12), mRNA.	AI266976; Akra
1.36905	Akr1c13	-40.9313	0.0586812	-56.0372	15.3837	0.865044	AKR1C13	Mus musculus aldo-keto reductase family 1, member C13 (Akr1c13), mRNA.	mKIAA4014; KIAA4014
0.236209	Akr1c14	22.1026	4.74778	5.22085	11.5667	0.835401	AKR1C14	Mus musculus aldo-keto reductase family 1, member C14 (Akr1c14), mRNA.	9030611N15Rik; AW557061
0.938233	Akr1c18	-62.4767	17.7091	-58.6176	22.1788	0.965754	AKR1C18	Mus musculus aldo-keto reductase family 1, member C18 (Akr1c18), mRNA.	AW146047
0.571207	Akr1c19	-68.5989	20.5882	-39.1842	9.57607	0.742137	AKR1C19	Mus musculus aldo-keto reductase family 1, member C19 (Akr1c19), mRNA.	1810010N06Rik
0.972712	Akr1c20	-50.552	2.57907	-49.1726	15.0562	0.987608	AKR1C20	Mus musculus aldo-keto reductase family 1, member C20 (Akr1c20), mRNA.	2610528B18Rik
0.546837	Akr1c21	-43.2323	7.61607	-23.641	12.9641	0.825785	AKR1C21	Mus musculus aldo-keto reductase family 1, member C21 (Akr1c21), mRNA.	AI315367; 9430025F20Rik; MGC102401
0.798463	Akr1c6	-57.057	5.33597	-45.5579	34.9226	0.900042	AKR1C6	Mus musculus aldo-keto reductase family 1, member C6 (Akr1c6), mRNA.	3alpha-HSD; Akr1c1; Hsd17b5
-0.136411	Akr1d1	-29.3353	16.1947	4.00166	38.1943	0.718235	AKR1D1	Mus musculus aldo-keto reductase family 1, member D1 (Akr1d1), mRNA.	MGC25814
1.03393	Akr1e1	848.61	48.1731	877.403	5.58141	0.844191	AKR1E1	Mus musculus aldo-keto reductase family 1, member E1 (Akr1e1), mRNA.	1810061I10Rik
1.46913	Akr7a5	159.017	8.71373	233.617	120.437	0.611397	AKR7A5	Mus musculus aldo-keto reductase family 7, member A5 (aflatoxin aldehyde reductase) (Akr7a5), mRNA.	Afar1; 0610025K21Rik; Afar
0.620034	Akt1	313.947	17.0111	194.658	8.59449	0.219306	AKT1	Mus musculus thymoma viral proto-oncogene 1 (Akt1), mRNA.	PKBalpha; Akt; PKB; PKB/Akt
2.32018	Akt1s1	12.3062	2.94803	28.5525	60.2835	0.868549	AKT1S1	Mus musculus AKT1 substrate 1 (proline-rich) (Akt1s1), mRNA.	Lobel; PRAS40; AI227026; Lobe; 1110012J22Rik
0.73084	Akt2	66.2609	43.4408	48.4261	77.2179	0.816056	AKT2
1.28644	Akt3	821.96	95.7744	1057.4	182.129	0.372302	AKT3	Mus musculus thymoma viral proto-oncogene 3 (Akt3), mRNA.	AI851531; D930002M15Rik
0.833287	Aktip	2141.8	34.2213	1784.74	452.128	0.294994	AKTIP	Mus musculus thymoma viral proto-oncogene 1 interacting protein (Aktip), mRNA.	Ft1; Fif; Ft; Fts
1.27609	Alad	486.618	134.914	620.967	260.594	0.550854	ALAD	Mus musculus aminolevulinate, delta-, dehydratase (Alad), mRNA.	Lv
1.04835	Alas1	1148.9	106.894	1204.45	302.901	0.819512	ALAS1	Mus musculus aminolevulinic acid synthase 1 (Alas1), mRNA.	Alas-h; Alas-1; ALAS
0.255285	Alas2	130.248	58.918	33.2502	34.4283	0.332161	ALAS2
0.607166	Alb	-86.7755	7.14465	-52.6872	6.41706	0.700061	ALB	Mus musculus albumin (Alb), mRNA.	Alb-1; Alb1
1.1899	Alcam	1015.66	109.421	1208.54	258.187	0.373602	ALCAM	Mus musculus activated leukocyte cell adhesion molecule (Alcam), mRNA.	AI853494; MuSC; MGC27910; BEN; CD166; DM-GRASP; SC1
1.34082	Aldh16a1	69.0196	39.3974	92.5427	0.462688	0.804822	ALDH16A1	Mus musculus aldehyde dehydrogenase 16 family, member A1 (Aldh16a1), mRNA.	2410004H02Rik; AI452234; mFLJ00209; MGC19339; FLJ00209
1.15963	Aldh18a1	100.082	42.9372	116.058	0.437391	0.868711	ALDH18A1	Mus musculus aldehyde dehydrogenase 18 family, member A1 (Aldh18a1), nuclear gene encoding mitochondrial protein, transcript variant 1, mRNA.	2810433K04Rik; Pycs; AI429789; MGC32233
0.189055	Aldh1a1	1401.5	274.112	264.961	210.209	1.18893e-05	ALDH1A1	Mus musculus aldehyde dehydrogenase family 1, subfamily A1 (Aldh1a1), mRNA.	Raldh1; E1; Ahd2; Aldh1a2; Ahd-2; Aldh1
0.283665	Aldh1a2	146.376	73.4379	41.5218	10.5423	0.312488	ALDH1A2	Mus musculus aldehyde dehydrogenase family 1, subfamily A2 (Aldh1a2), mRNA.	Raldh1; AV116159; Raldh2; RALDH-2; Aldh1a7
-3.30344	Aldh1a3	-11.4374	31.059	37.7829	10.0769	0.593583	ALDH1A3	Mus musculus aldehyde dehydrogenase family 1, subfamily A3 (Aldh1a3), mRNA.	RALDH3; ALDH6; V1
0.89345	Aldh1a7	-48.0291	4.5837	-42.9116	11.2009	0.954008	ALDH1A7	Mus musculus aldehyde dehydrogenase family 1, subfamily A7 (Aldh1a7), mRNA.	Aldh1a4; Aldhpb; AI987940; Aldh-pb; Ahd2-like
-0.760494	Aldh1b1	-26.5184	21.9368	20.1671	64.4934	0.64054	ALDH1B1	Mus musculus aldehyde dehydrogenase 1 family, member B1 (Aldh1b1), nuclear gene encoding mitochondrial protein, mRNA.	2700007F14Rik; MGC101971
0.457031	Aldh1l1	342.389	86.0987	156.482	18.7165	0.101735	ALDH1L1	Mus musculus aldehyde dehydrogenase 1 family, member L1 (Aldh1l1), mRNA.	Fthfd; 1810048F20Rik
1.06355	Aldh1l2	239.921	7.23982	255.169	219.088	0.85826	ALDH1L2	Mus musculus aldehyde dehydrogenase 1 family, member L2 (Aldh1l2), mRNA.	D330038I09Rik; MGC19039
0.731673	Aldh2	3782.04	535.509	2767.22	1208.21	0.279596	ALDH2	Mus musculus aldehyde dehydrogenase 2, mitochondrial (Aldh2), nuclear gene encoding mitochondrial protein, mRNA.	Ahd5; Ahd-5
1.29259	Aldh3a1	69.2846	1.34998	89.5569	70.3452	0.84198	ALDH3A1	Mus musculus aldehyde dehydrogenase family 3, subfamily A1 (Aldh3a1), mRNA.	Ahd-4; Aldh3; Ahd4; Aldh
0.818327	Aldh3a2	810.394	150.227	663.168	69.4368	0.366614	ALDH3A2	Mus musculus aldehyde dehydrogenase family 3, subfamily A2 (Aldh3a2), mRNA.	Ahd3-r; Ahd-3; Ahd-3r; Ahd3; Aldh4; Aldh4-r; AI194803
0.580318	Aldh3b1	263.204	69.0234	152.742	143.178	0.420219	ALDH3B1	Mus musculus aldehyde dehydrogenase 3 family, member B1 (Aldh3b1), mRNA.	ALDH7; ALDH4; 1700001N19Rik
0.824579	Aldh4a1	931.629	262.552	768.202	100.367	0.473249	ALDH4A1	Mus musculus aldehyde dehydrogenase 4 family, member A1 (Aldh4a1), nuclear gene encoding mitochondrial protein, mRNA.	Aldh5a1; Ssdh1; P5CD; ALDH4; E330022C09; P5CDH; P5CDhL; A930035F14Rik; Ahd-1; P5CDhS; Ahd1
0.893841	Aldh5a1	1347.14	86.9487	1204.13	415.375	0.751543	ALDH5A1	Mus musculus aldhehyde dehydrogenase family 5, subfamily A1 (Aldh5a1), mRNA.	Ssdh1; 6330403E24Rik; D630032B01Rik; Ahd-1; Ahd1
0.538848	Aldh6a1	1309.34	166.063	705.536	174.965	0.00163951	ALDH6A1	Mus musculus aldehyde dehydrogenase family 6, subfamily A1 (Aldh6a1), nuclear gene encoding mitochondrial protein, mRNA.	MGC37325; AI314632; 1110038I05Rik
0.627392	Aldh7a1	222.61	33.2173	139.664	138.273	0.533988	ALDH7A1	Mus musculus aldehyde dehydrogenase family 7, member A1 (Aldh7a1), mRNA.	Atq1; D18Wsu181e
0.591551	Aldh8a1	-29.4181	11.8238	-17.4023	14.2466	0.890464	ALDH8A1	Mus musculus aldehyde dehydrogenase 8 family, member A1 (Aldh8a1), mRNA.	Raldh4
-24.0977	Aldh9a1	-0.894001	9.9205	21.5434	20.0283	0.80306	ALDH9A1	Mus musculus aldehyde dehydrogenase 9, subfamily A1 (Aldh9a1), mRNA.	AA139417; ESTM40; TMABA-DH
1.02521	Aldoa	5817.4	396.811	5964.06	726.903	0.841035	ALDOA	Mus musculus aldolase A, fructose-bisphosphate (Aldoa), mRNA.	Aldo-1; MGC107164; Aldo1
1.64407	Aldob	42.9137	44.9665	70.553	31.5478	0.772906	ALDOB	Mus musculus aldolase B, fructose-bisphosphate (Aldob), mRNA.	BC016435; Aldo2; Aldo-2; MGC36398
0.464239	Aldoc	4954.88	150.635	2300.25	341.431	6.19612e-16	ALDOC	Mus musculus aldolase C, fructose-bisphosphate (Aldoc), mRNA.	AI847350; AU040929; Scrg2; Aldo3
1.86427	Alg1	60.9294	0.365006	113.589	29.654	0.569865	ALG1	Mus musculus asparagine-linked glycosylation 1 homolog (yeast, beta-1,4-mannosyltransferase) (Alg1), mRNA.	MGC18946; HMT1; HMAT1
0.801682	Alg10b	400.614	1.66316	321.165	92.0477	0.477406	ALG10B	Mus musculus asparagine-linked glycosylation 10 homolog B (yeast, alpha-1,2-glucosyltransferase) (Alg10b), mRNA. XM_922905	AA469671; Gm917; AU045404; C85569; AW123895
1.02449	Alg11	878.694	95.316	900.218	196.139	0.904741	ALG11	Mus musculus asparagine-linked glycosylation 11 homolog (yeast, alpha-1,2-mannosyltransferase) (Alg11), mRNA.	AI849156; AW492253; B230397C21
1.10316	Alg12	105.777	35.845	116.689	17.7173	0.894944	ALG12	Mus musculus asparagine-linked glycosylation 12 homolog (yeast, alpha-1,6-mannosyltransferase) (Alg12), mRNA.	ECM39; MGC29374
0.54729	Alg13	92.3157	35.3942	50.5234	8.70606	0.654207	ALG13	Mus musculus asparagine-linked glycosylation 13 homolog (S. cerevisiae) (Alg13), mRNA.	4833435D08Rik; 2810046O15Rik; Glt28d1; MDS031
0.807884	Alg14	221.181	18.2532	178.689	18.3233	0.657562	ALG14	Mus musculus asparagine-linked glycosylation 14 homolog (yeast) (Alg14), mRNA.	AI854024; 5430428G01Rik
1.57732	Alg2	713.326	55.476	1125.15	454.005	0.219057	ALG2	Mus musculus asparagine-linked glycosylation 2 homolog (yeast, alpha-1,3-mannosyltransferase) (Alg2), mRNA.	CDGIi; ALPG2; 1110018A23Rik; MNCb-5081; 1300013N08Rik
0.759995	Alg3	68.6554	37.9246	52.1778	1.09314	0.851887	ALG3	Mus musculus asparagine-linked glycosylation 3 homolog (yeast, alpha-1,3-mannosyltransferase) (Alg3), mRNA.	D16Ertd36e; MGC36684
0.585163	Alg5	702.688	118.692	411.187	23.2517	0.0326094	ALG5	Mus musculus asparagine-linked glycosylation 5 homolog (yeast, dolichyl-phosphate beta-glucosyltransferase) (Alg5), mRNA.	AW545564; AV170001; AV009521; 1500026A19Rik; 2600005J22Rik
1.07906	Alg6	130.061	58.7088	140.344	105.453	0.932999	ALG6	Mus musculus asparagine-linked glycosylation 6 homolog (yeast, alpha-1,3,-glucosyltransferase) (Alg6), mRNA.	E230028F23Rik
0.979893	Alg8	91.4708	21.5292	89.6316	14.6308	0.998746	ALG8	Mus musculus asparagine-linked glycosylation 8 homolog (yeast, alpha-1,3-glucosyltransferase) (Alg8), mRNA.	Gm1089; AI447372; MGC74399
1.75117	Alg9	53.0142	2.29504	92.8366	30.1115	0.626171	ALG9	Mus musculus asparagine-linked glycosylation 9 homolog (yeast, alpha 1,2 mannosyltransferase) (Alg9), mRNA.	AI747665; Dibd1; 8230402H15Rik; B430313H07Rik
1.38041	Alk	128.99	41.1337	178.06	49.6252	0.619286	ALK	Mus musculus anaplastic lymphoma kinase (Alk), mRNA.	CD246; Tcrz
8.48012	Alkbh2	8.21378	21.1885	69.6538	9.14209	0.502424	ALKBH2	Mus musculus alkB, alkylation repair homolog 2 (E. coli) (Alkbh2), mRNA.	Abh2; AU016977; mABH2; 9530023G02
0.933606	Alkbh3	364.846	1.82733	340.622	139.657	0.856585	ALKBH3	Mus musculus alkB, alkylation repair homolog 3 (E. coli) (Alkbh3), mRNA. XM_924276	mABH3; Abh3; 1700108H04Rik; 1810020C19Rik
1.02762	Alkbh4	-14.5488	19.9943	-14.9505	16.0621	0.996425	ALKBH4	Mus musculus alkB, alkylation repair homolog 4 (E. coli) (Alkbh4), mRNA. XM_925313 XM_925314 XM_925316 XM_979058 XM_979099 XM_979130	Abj4; 2010004B12Rik
0.775198	Alkbh5	699.306	46.8039	542.101	16.2543	0.188757	ALKBH5	Mus musculus alkB, alkylation repair homolog 5 (E. coli) (Alkbh5), mRNA.	E130207K11; Ofoxd; AW050020; Abh5
1.07967	Alkbh7	750.292	1.48142	810.071	384.398	0.835443	ALKBH7	Mus musculus alkB, alkylation repair homolog 7 (E. coli) (Alkbh7), mRNA.	2510008E23Rik; 2310045B01Rik; Spata11; Abh7
3.0594	Alkbh8	38.582	38.4024	118.038	7.83478	0.406659	ALKBH8	Mus musculus alkB, alkylation repair homolog 8 (E. coli) (Alkbh8), mRNA.	MGC10235; Abh8; 9430088N01Rik; 8030431D03Rik; 4930562C03Rik
3.99754	Allc	10.8347	28.3153	43.3124	13.9302	0.726183	ALLC	Mus musculus allantoicase (Allc), mRNA.	MGC124130; MGC124129; 1700012B22Rik; Alc
0.689727	Alox12	-54.2321	1.25842	-37.4053	0.907832	0.849552	ALOX12	Mus musculus arachidonate 12-lipoxygenase (Alox12), mRNA.	9930022G08Rik; Alox12p; P-12LO
-0.720225	Alox12b	-26.6974	12.9585	19.2281	6.84666	0.609138	ALOX12B	Mus musculus arachidonate 12-lipoxygenase, 12R type (Alox12b), mRNA.	Aloxe2; e-LOX2; MGC130560
0.571204	Alox12e	-58.3353	13.6457	-33.3214	12.2433	0.778222	ALOX12E	Mus musculus arachidonate lipoxygenase, epidermal (Alox12e), mRNA.	Alox12-ps2; e-LOX1; AW259591; Aloxe; Alox12-ps1; 8-LOX
0.648263	Alox15	-64.707	2.02659	-41.9471	25.6238	0.800691	ALOX15	Mus musculus arachidonate 15-lipoxygenase (Alox15), mRNA.	Alox12l; 12-LO; L-12LO
0.614924	Alox5	-47.9858	37.7578	-29.5077	3.50864	0.841297	ALOX5	Mus musculus arachidonate 5-lipoxygenase (Alox5), mRNA.	5LO; F730011J02; AI850497; 5LX; 5-LOX; 5-LO
0.839134	Alox5ap	219.473	169.754	184.167	90.1631	0.827169	ALOX5AP	Mus musculus arachidonate 5-lipoxygenase activating protein (Alox5ap), mRNA.	Flap
1.17611	Alox8	-19.6956	8.8035	-23.1642	11.0175	0.968948	ALOX8	Mus musculus arachidonate 8-lipoxygenase (Alox8), mRNA.	Alox15b; 8S-LOX; 8-LOX
14.0511	Aloxe3	6.07557	18.0976	85.3686	67.5433	0.430586	ALOXE3	Mus musculus arachidonate lipoxygenase 3 (Aloxe3), mRNA.	e-LOX-3; MGC143830; MGC143829
0.58841	Alpk3	-29.9734	12.0944	-17.6366	9.41876	0.889934	ALPK3	Mus musculus alpha-kinase 3 (Alpk3), mRNA.	D330016D04; MAK; Midori; KIAA1330; mKIAA1330; AW319487
1.71122	Als2	374.655	37.1673	641.118	286.428	0.162697	ALS2	Mus musculus amyotrophic lateral sclerosis 2 (juvenile) homolog (human) (Als2), mRNA.	MGC27807; mKIAA1563; 3222402C23Rik; Alsin; Als2cr6; 9430073A21Rik
0.490585	Als2cl	-56.696	2.79901	-27.8142	8.26578	0.745267	ALS2CL	Mus musculus ALS2 C-terminal like (Als2cl), mRNA.	BC022645; 79H19D; mRn.49018; D930044G19Rik; 79H19E
0.695039	Als2cr11	-64.4021	11.8124	-44.7619	24.6704	0.826948	ALS2CR11	Mus musculus amyotrophic lateral sclerosis 2 (juvenile) chromosome region, candidate 11 (human) (Als2cr11), mRNA.	1700052H20Rik
0.747377	Als2cr12	-73.3465	2.16285	-54.8175	0.840025	0.834175	ALS2CR12	Mus musculus amyotrophic lateral sclerosis 2 (juvenile) chromosome region, candidate 12 (human) (Als2cr12), mRNA.	4933425F06Rik; 4933405P16Rik
0.908026	Als2cr13	381.256	43.9933	346.19	69.6081	0.839717	ALS2CR13	Mus musculus amyotrophic lateral sclerosis 2 (juvenile) chromosome region, candidate 13 (human) (Als2cr13), transcript variant 1, mRNA.	6330416D14Rik; 2810425F24Rik; MGC90831
1.20948	Als2cr4	141.978	6.31929	171.719	4.04783	0.790197	ALS2CR4	Mus musculus amyotrophic lateral sclerosis 2 (juvenile) chromosome region, candidate 4 (Als2cr4), transcript variant 1, mRNA.	Gm972; AI853305
0.440584	Alx1	-36.4442	0.202483	-16.0568	7.27716	0.819106	ALX1	Mus musculus ALX homeobox 1 (Alx1), mRNA.	C130005I02; AI314867; Cart1
0.480487	Alx3	80.531	13.5925	38.6941	18.8699	0.658788	ALX3	Mus musculus aristaless 3 (Alx3), mRNA.
1.50817	Alx4	248.297	17.9042	374.475	171.646	0.403224	ALX4	Mus musculus aristaless-like homeobox 4 (Alx4), mRNA.	lst
1.52408	Amac1	166.088	21.3885	253.133	277.178	0.686062	AMAC1	Mus musculus acyl-malonyl condensing enzyme 1 (Amac1), mRNA.
-0.140838	Amacr	-38.7341	21.7439	5.45525	16.8721	0.624308	AMACR	Mus musculus alpha-methylacyl-CoA racemase (Amacr), mRNA.	Macr1
0.64407	Ambn	-70.7419	0.723092	-45.5627	5.89475	0.776313	AMBN	Mus musculus ameloblastin (Ambn), mRNA.	MGC107285
0.537892	Ambp	-75.7156	12.4045	-40.7268	15.3358	0.693419	AMBP	Mus musculus alpha 1 microglobulin/bikunin (Ambp), mRNA.	ASPI; Itil; UTI; Intin4; HI-30; AI194774
1.51989	Ambra1	156.207	20.8183	237.417	13.0718	0.407961	AMBRA1	Mus musculus autophagy/beclin 1 regulator 1 (Ambra1), transcript variant 1, mRNA.	AV021921; RP23-273F8.1; AA474864; mKIAA1736; Ambra1; A130023A14; 2310079H06Rik
0.636804	Amd2	122.521	54.987	78.0218	16.6094	0.651751	AMD2	Mus musculus S-adenosylmethionine decarboxylase 2 (Amd2), mRNA.	Amd1; Amd3
3.29613	Amdhd2	12.654	6.63846	41.7094	11.0273	0.734475	AMDHD2	Mus musculus amidohydrolase domain containing 2 (Amdhd2), mRNA.	5730457F11Rik
0.465918	Amelx	-56.4033	29.472	-26.2793	13.0442	0.740084	AMELX	Mus musculus amelogenin X chromosome (Amelx), mRNA.	AMGX; AMGL; Amg; ALGN; Amel
0.762364	Amfr	1362.95	0.405238	1039.07	349.885	0.22712	AMFR	Mus musculus autocrine motility factor receptor (Amfr), mRNA.	gp78
0.269497	Amh	-47.531	3.79133	-12.8095	10.1524	0.696953	AMH	Mus musculus anti-Mullerian hormone (Amh), mRNA.	MIS
2.24293	Amhr2	12.8866	21.2644	28.9038	21.9161	0.832766	AMHR2	Mus musculus anti-Mullerian hormone type 2 receptor (Amhr2), mRNA.	Misrii; MISIIR; MGC141312
3.93282	Amica1	13.9607	28.7293	54.905	67.9552	0.688023	AMICA1	Mus musculus adhesion molecule, interacts with CXADR antigen 1 (Amica1), mRNA.	Gm638; AMICA; Crea7; MGC61025
1.30513	Amigo1	935.699	86.7696	1221.21	424.333	0.367115	AMIGO1	Mus musculus adhesion molecule with Ig like domain 1 (Amigo1), mRNA.	RP23-89M15.6; ali2; A; Amigo; MGC25558
2.51077	Amigo2	388.06	20.5385	974.33	256.192	0.00381535	AMIGO2	Mus musculus adhesion molecule with Ig like domain 2 (Amigo2), mRNA.	AI415330; AW208913; Ali1
1.31034	Amigo3	-20.4275	12.7528	-26.7671	20.7881	0.943534	AMIGO3	Mus musculus adhesion molecule with Ig like domain 3 (Amigo3), mRNA.	E430002N15Rik; ali3; mKIAA1851
0.86902	Ammecr1l	949.774	20.498	825.373	63.1519	0.384792	AMMECR1L	Mus musculus AMME chromosomal region gene 1-like (Ammecr1l), mRNA.	MGC32132; AU040755; AU022236; AW111353; E230022H04Rik; 5430429D03Rik
4.31626	Amn	36.9347	44.8567	159.419	211.103	0.486386	AMN	Mus musculus amnionless (Amn), mRNA.	5033428N14Rik; AV002116
0.00670842	Amot	20.6539	3.53383	0.138555	2.73004	0.82265	AMOT
0.553373	Amotl2	-35.2827	3.92151	-19.5245	48.0015	0.867615	AMOTL2	Mus musculus angiomotin-like 2 (Amotl2), mRNA.	MASCOT; Lccp; AW549739; mKIAA0989; C79691
0.0171429	Ampd1	-23.0815	1.94531	-0.395684	16.9256	0.799311	AMPD1	Mus musculus adenosine monophosphate deaminase 1 (isoform M) (Ampd1), mRNA. XM_921992	AI553520; Ampd-1
3.00786	Ampd2	43.1358	4.65524	129.746	95.0172	0.495906	AMPD2	Mus musculus adenosine monophosphate deaminase 2 (isoform L) (Ampd2), mRNA.	Ampd-2; 1200014F01Rik; AI552571
1.09017	Ampd3	66.551	1.32228	72.5516	23.9224	0.947703	AMPD3	Mus musculus adenosine monophosphate deaminase 3 (Ampd3), mRNA.
1.53542	Amph	187.82	25.2479	288.383	116.581	0.531534	AMPH	Mus musculus amphiphysin (Amph), mRNA.	MGC49429
0.633897	Amt	518.525	17.7941	328.692	100.941	0.103054	AMT	Mus musculus aminomethyltransferase (Amt), mRNA.	EG434437; Amt
1.68546	Amy1	276.283	10.0706	465.663	400.281	0.523691	AMY1	Mus musculus amylase 1, salivary (Amy1), mRNA.	C030014B17Rik; Amy-1
1.96456	Amy2	251.244	8.64332	493.584	388.597	0.401843	AMY2	Mus musculus amylase 2, pancreatic (Amy2), mRNA.	Amy-2
0.516643	Amy2-2	-67.8375	9.40471	-35.0477	34.5584	0.719905	AMY2-2	Mus musculus amylase 2-2, pancreatic (Amy2-2), mRNA.
1.01394	Amz1	81.0009	15.1533	82.1297	21.9042	0.990191	AMZ1	Mus musculus archaelysin family metallopeptidase 1 (Amz1), mRNA.	5330426I05; Amz1
0.661369	Amz2	357.46	54.074	236.413	32.3384	0.243616	AMZ2	Mus musculus archaelysin family metallopeptidase 2 (Amz2), mRNA.	ESTM12; AA408420; Amz2
1.23058	Anapc1	45.3525	1.05049	55.8098	12.2524	0.908463	ANAPC1
1.10852	Anapc10	24.5521	1.00186	27.2164	16.0853	0.97675	ANAPC10	Mus musculus anaphase promoting complex subunit 10 (Anapc10), mRNA.	1500026N15Rik; A830003M23Rik; APC10
1.17903	Anapc11	72.6264	13.2863	85.6289	23.4509	0.894738	ANAPC11	Mus musculus anaphase promoting complex subunit 11 (Anapc11), transcript variant 2, mRNA.	R75218; 1110011I19Rik
0.661678	Anapc13	4393.78	386.271	2907.27	970.881	0.0457256	ANAPC13	Mus musculus anaphase promoting complex subunit 13 (Anapc13), mRNA.	SWM1; 1810004D07Rik; APC13
1.36578	Anapc2	321.559	14.6441	439.18	180.262	0.45145	ANAPC2	Mus musculus anaphase promoting complex subunit 2 (Anapc2), mRNA.	AL024279; mKIAA1406; 9230107K09Rik; APC2
1.37474	Anapc4	2629.99	233.058	3615.55	117.307	0.0292144	ANAPC4	Mus musculus anaphase promoting complex subunit 4 (Anapc4), mRNA.	APC4; D5Ertd249e; 2610306D21Rik
1.31409	Anapc5	1068.49	29.8638	1404.09	306.076	0.342336	ANAPC5	Mus musculus anaphase-promoting complex subunit 5 (Anapc5), transcript variant 1, mRNA.	AA986414; AA536819; 2510006G12Rik; Anpc5; AA408751
1.49225	Anapc7	422.075	24.6167	629.839	356.706	0.438509	ANAPC7	Mus musculus anaphase promoting complex subunit 7 (Anapc7), mRNA.	APC7; AW545589
0.0867411	Ang	82.0911	30.4626	7.12067	9.97844	0.412641	ANG	Mus musculus angiogenin, ribonuclease, RNase A family, 5 (Ang), mRNA.	AI385586; Ang; Rnase5; Rnase5a; Ang1
0.691168	Ang2	-55.6528	1.33002	-38.4654	1.70709	0.846456	ANG2	Mus musculus angiogenin, ribonuclease A family, member 2 (Ang2), mRNA.	Angrp; Rnase5b
0.354623	Ang4	-22.6351	9.00263	-8.02691	6.55802	0.870101	ANG4	Mus musculus angiogenin, ribonuclease A family, member 4 (Ang4), mRNA.	Rnase5d
1.51625	Angel1	55.3473	17.1767	83.9201	68.7576	0.77743	ANGEL1	Mus musculus angel homolog 1 (Drosophila) (Angel1), mRNA.	1110030H02Rik; mKIAA0759; KIAA0759
1.00506	Angel2	1176.99	47.4462	1182.94	445.511	0.985628	ANGEL2	Mus musculus angel homolog 2 (Drosophila) (Angel2), mRNA.	D1Ertd396e; D1Ertd654e; 2610307I21Rik; 5730410O10Rik; AI845692
0.339555	Angpt1	98.9153	0.364129	33.5872	1.96387	0.470919	ANGPT1	Mus musculus angiopoietin 1 (Angpt1), mRNA.	Ang-1; 1110046O21Rik; ang1
0.785774	Angpt2	62.0201	4.87823	48.7338	33.3501	0.892545	ANGPT2	Mus musculus angiopoietin 2 (Angpt2), mRNA.	Agpt2; Ang-2; Ang2
0.559071	Angpt4	-63.3578	6.23212	-35.4215	15.4399	0.753081	ANGPT4	Mus musculus angiopoietin 4 (Angpt4), mRNA.	MGC156453; Agpt4; Ang3
1.1061	Angptl1	212.085	67.0504	234.587	196.646	0.895341	ANGPTL1	Mus musculus angiopoietin-like 1 (Angptl1), mRNA.	ANG3; 2810039D03Rik; ANGPT3; ANGY; MGC100363; ARP1
0.316758	Angptl2	34.6592	42.1125	10.9786	45.5008	0.808999	ANGPTL2	Mus musculus angiopoietin-like 2 (Angptl2), mRNA.	AI593246; Arp2; AW260363
0.308727	Angptl3	-22.9379	20.3849	-7.08155	13.2027	0.859917	ANGPTL3	Mus musculus angiopoietin-like 3 (Angptl3), mRNA.	hypl
2.0302	Angptl4	20.4355	20.4892	41.4881	37.1588	0.820166	ANGPTL4	Mus musculus angiopoietin-like 4 (Angptl4), mRNA.	HFARP; Bk89; PGARG; PGAR; pp1158; ARP4; Ng27; FIAF
1.44762	Angptl7	174.163	8.62344	252.123	115.112	0.518719	ANGPTL7	Mus musculus angiopoietin-like 7 (Angptl7), mRNA.
0.824601	Ank	2718.52	259.726	2241.7	120.142	0.149388	ANK	Mus musculus progressive ankylosis (Ank), mRNA.	mKIAA1581; D15Ertd221e
1.32448	Ank1	326.429	49.5463	432.349	58.483	0.360831	ANK1	Mus musculus ankyrin 1, erythroid (Ank1), mRNA.	nb; Ank-1
1.23013	Ank2	2371.02	501.716	2916.67	1080.42	0.520057	ANK2	Mus musculus ankyrin 2, brain (Ank2), transcript variant 3, mRNA.	AW491075; Ankyrin-B; Ank-2; ankyrin>B<; AI835472; ankyrin B; Ankyrin-2
2.04911	Ank3	401.022	15.5421	821.738	151.512	0.0584495	ANK3	Mus musculus ankyrin 3, epithelial (Ank3), transcript variant 6, mRNA.	Ankyrin-3; AnkG; 2900054D09Rik; AI314020; Ank-3; MGC14049
0.648807	Ankar	66.0968	9.11064	42.8841	10.1387	0.798588	ANKAR	Mus musculus ankyrin and armadillo repeat containing (Ankar), mRNA.	4932422E22Rik
2.28047	Ankfn1	233.429	80.3164	532.326	227.591	0.119208	ANKFN1	Mus musculus ankyrin-repeat and fibronectin type III domain containing 1 (Ankfn1), mRNA.	Gm1175
1.82365	Ankfy1	142.836	49.3348	260.483	31.3765	0.256583	ANKFY1	Mus musculus ankyrin repeat and FYVE domain containing 1 (Ankfy1), mRNA.	ZFYVE14; Ankhzn; mKIAA1255
0.764235	Ankib1	265.417	37.3204	202.841	12.7399	0.525764	ANKIB1	Mus musculus ankyrin repeat and IBR domain containing 1 (Ankib1), mRNA.	4631416I11Rik; mKIAA1386; MGC90780; C80642; AW494740; 2310061P20Rik
0.537252	Ankk1	-83.0367	7.34839	-44.6116	11.0738	0.664478	ANKK1	Mus musculus ankyrin repeat and kinase domain containing 1 (Ankk1), mRNA.	9930020N01Rik
1.18711	Ankle2	625.603	26.7948	742.659	45.1118	0.440507	ANKLE2	Mus musculus ankyrin repeat and LEM domain containing 2 (Ankle2), mRNA.	AI661024; 1110001J12Rik
-0.000837629	Ankmy1	-20.1757	0.363241	0.0168997	1.51318	0.816848	ANKMY1	Mus musculus ankyrin repeat and MYND domain containing 1 (Ankmy1), mRNA.	MGC141406; 4930483I10Rik; ZMYND13
1.29026	Ankmy2	690.787	81.6302	891.293	67.7847	0.432883	ANKMY2	Mus musculus ankyrin repeat and MYND domain containing 2 (Ankmy2), transcript variant 1, mRNA.	MGC18754; AI035571; ZMYND20
1.00474	Ankra2	570.417	11.8812	573.121	68.6873	0.982121	ANKRA2	Mus musculus ankyrin repeat, family A (RFXANK-like), 2 (Ankra2), mRNA.	AU023827; MGC90650; AI450635; Ankra; 1110004M18Rik
1.28387	Ankrd1	68.2878	9.06161	87.6724	52.2025	0.813877	ANKRD1	Mus musculus ankyrin repeat domain 1 (cardiac muscle) (Ankrd1), mRNA.	Crap; CARP; Alrp
1.28914	Ankrd10	771.696	59.4304	994.825	570.54	0.590784	ANKRD10	Mus musculus ankyrin repeat domain 10 (Ankrd10), mRNA.	4833425P12Rik; AW549277
0.984198	Ankrd12	1498.49	103.685	1474.81	569.724	0.121894	ANKRD12	Mus musculus ankyrin repeat domain 12 (Ankrd12), mRNA.	2900001A12Rik; mKIAA0874; ANCO-2; AV347965; GAC-1; AI447928
0.829164	Ankrd13a	49.618	20.5299	41.1415	1.31579	0.925643	ANKRD13A	Mus musculus ankyrin repeat domain 13a (Ankrd13a), mRNA.	1100001D10Rik; MGC118502; ANKRD13; AU046136
-8.33433	Ankrd13b	-8.22173	29.5062	68.5227	41.7644	0.418108	ANKRD13B	Mus musculus ankyrin repeat domain 13b (Ankrd13b), mRNA.	B930093C12Rik; AW124583
1.31384	Ankrd13c	13.8706	17.9861	18.2238	10.5851	0.961448	ANKRD13C	Mus musculus ankyrin repeat domain 13c (Ankrd13c), mRNA.	AI505652
1.08897	Ankrd13d	724.462	25.4396	788.916	116.847	0.64106	ANKRD13D	Mus musculus ankyrin repeat domain 13 family, member D (Ankrd13d), mRNA.	AI430801; 0710001P18Rik
-2.41467	Ankrd16	-24.8358	28.5044	59.9704	41.9514	0.370346	ANKRD16	Mus musculus ankyrin repeat domain 16 (Ankrd16), mRNA. XM_001003070 XM_001003077	AI646698; D430029B21Rik; 2810455F06Rik
1.40742	Ankrd17	514.996	1.30959	724.818	33.7352	0.246077	ANKRD17	Mus musculus ankyrin repeat domain 17 (Ankrd17), transcript variant 2, mRNA.	AU040470; Foe; Gtar; 4933425K22Rik; Mask; AA516750; mKIAA0697; A130069E23Rik; AA407558; A930008M01
8.14084	Ankrd2	0.986643	36.8433	8.0321	3.48038	0.939412	ANKRD2	Mus musculus ankyrin repeat domain 2 (stretch responsive muscle) (Ankrd2), mRNA.	mArpp; Arpp
0.931931	Ankrd22	-48.4294	15.8666	-45.1328	29.206	0.97101	ANKRD22	Mus musculus ankyrin repeat domain 22 (Ankrd22), mRNA.	D19Ertd675e; 5430429D21Rik
1.08529	Ankrd23	47.3478	56.3961	51.386	18.7452	0.967249	ANKRD23	Mus musculus ankyrin repeat domain 23 (Ankrd23), mRNA.	MARP3; 2310041C05Rik; 1110058D09Rik; Darp; AI853437
1.30019	Ankrd24	39.7941	28.1928	51.7397	12.5237	0.896797	ANKRD24	Mus musculus ankyrin repeat domain 24 (Ankrd24), mRNA.	D10Bur2e; 5730519E19Rik; 4631433D01Rik
0.696916	Ankrd25	721.875	13.8162	503.087	292.186	0.335266	ANKRD25	Mus musculus ankyrin repeat domain 25 (Ankrd25), mRNA.	BC010245; AI504612; MGC7734; MGC12143
1.63485	Ankrd27	65.3931	21.4095	106.908	79.6135	0.668507	ANKRD27	Mus musculus ankyrin repeat domain 27 (VPS9 domain) (Ankrd27), transcript variant 2, mRNA.	MGC25907; BC016493; Varp; D330003H11Rik; AA408090
10.5004	Ankrd32	8.86896	26.8154	93.1279	76.1704	0.420409	ANKRD32	Mus musculus ankyrin repeat domain 32 (Ankrd32), mRNA.	MGC102362; AW545819; C730024G01Rik
1.00779	Ankrd33	33.3262	3.74023	33.5859	24.7123	0.990049	ANKRD33	Mus musculus ankyrin repeat domain 33 (Ankrd33), mRNA.	MGC31569; A930021G21Rik
1.39425	Ankrd34a	402.206	104.238	560.777	347.934	0.558984	ANKRD34A	Mus musculus ankyrin repeat domain 34A (Ankrd34a), mRNA.
1.13758	Ankrd35	122.297	37.8104	139.123	0.2392	0.861335	ANKRD35	Mus musculus ankyrin repeat domain 35 (Ankrd35), mRNA.	4732436F15Rik
12.2161	Ankrd36	5.39329	20.8884	65.8848	100.058	0.59431	ANKRD36	Mus musculus ankyrin repeat domain 36 (Ankrd36), mRNA.	1700012M14Rik; Ankrd48; RP23-387E5.1; 1700008J08Rik
1.19795	Ankrd37	273.442	79.466	327.57	12.8749	0.639875	ANKRD37	Mus musculus ankyrin repeat domain 37 (Ankrd37), mRNA.
1.29817	Ankrd39	52.3323	23.7924	67.9364	60.4559	0.874666	ANKRD39	Mus musculus ankyrin repeat domain 39 (Ankrd39), mRNA.	9130416N05Rik; C030004B10Rik
1.3859	Ankrd40	407.209	2.34676	564.352	344.163	0.772903	ANKRD40	Mus musculus ankyrin repeat domain 40 (Ankrd40), transcript variant 1, mRNA.	Gcap15; 5530600A18Rik; MGC29030; RP23-65I14.1; 1110011C06Rik
-0.568115	Ankrd42	-38.6181	2.68786	21.9396	22.5826	0.500231	ANKRD42	Mus musculus ankyrin repeat domain 42 (Ankrd42), mRNA.	4931426M20; 4933417L02Rik
0.999301	Ankrd46	580.826	1.77799	580.42	266.508	0.998457	ANKRD46	Mus musculus ankyrin repeat domain 46 (Ankrd46), mRNA.	1110054N06Rik; AI987733; AI314978
1.32736	Ankrd47	117.686	17.1873	156.211	44.0373	0.683249	ANKRD47	Mus musculus ankyrin repeat domain 47 (Ankrd47), mRNA.	0610013D04Rik; NG28; D17Ertd288e
0.375781	Ankrd49	167.531	18.6535	62.9549	55.0029	0.282659	ANKRD49	Mus musculus ankyrin repeat domain 49 (Ankrd49), mRNA.	MGC25252; Gbif; AW060934
0.317241	Ankrd5	-50.6737	11.6385	-16.0758	5.02984	0.697774	ANKRD5	Mus musculus ankyrin repeat domain 5 (Ankrd5), mRNA.	AV276460
2.00426	Ankrd50	109.288	17.3999	219.041	112.902	0.35832	ANKRD50	Mus musculus ankrin repeat domain 50 (Ankrd50), mRNA.	E430012K20Rik; KIAA1223; AI662170; mKIAA1223; mKIAA3019
-1.63256	Ankrd53	-7.68166	19.2105	12.5408	33.8309	0.825702	ANKRD53	Mus musculus ankyrin repeat domain 53 (Ankrd53), mRNA.	4930564N15Rik
1.43301	Ankrd54	32.7712	4.56374	46.9613	7.33591	0.871254	ANKRD54	Mus musculus ankyrin repeat domain 54 (Ankrd54), mRNA.	C730048E16Rik; EST475269; MGC25673; EST1068184
-0.825974	Ankrd55	-18.1639	21.7061	15.0029	9.80103	0.713716	ANKRD55	Mus musculus ankyrin repeat domain 55 (Ankrd55), mRNA.	C030011J08Rik
0.465026	Ankrd56	221.817	22.8627	103.151	2.28307	0.203076	ANKRD56	Mus musculus ankyrin repeat domain 56 (Ankrd56), mRNA.	5730467H21Rik
3.3254	Ankrd58	-6.98354	2.28255	-23.2231	3.82674	0.855461	ANKRD58	Mus musculus ankyrin repeat domain 58 (Ankrd58), mRNA.	MGC130350; A630014H24Rik; MGC130351
1.11921	Ankrd6	121.514	23.316	135.999	65.7354	0.921404	ANKRD6	Mus musculus ankyrin repeat domain 6 (Ankrd6), transcript variant 2, mRNA.
7.22202	Ankrd7	2.27596	18.0987	16.437	36.8055	0.878047	ANKRD7	Mus musculus ankyrin repeat domain 7 (Ankrd7), mRNA.	4930532L20Rik; AV278427
0.613802	Ankrd9	239.111	27.2241	146.767	54.5564	0.344297	ANKRD9
0.878651	Anks1	94.1958	1.15834	82.7652	50.7619	0.905019	ANKS1	Mus musculus ankyrin repeat and SAM domain containing 1 (Anks1), mRNA.	MGC59413; mKIAA0229
1.93215	Anks3	312.524	8.49529	603.844	217.022	0.213249	ANKS3	Mus musculus ankyrin repeat and sterile alpha motif domain containing 3 (Anks3), mRNA.	C81345; 2700067D09Rik; mKIAA1977
1.65945	Anks6	52.3335	7.1595	86.8446	13.5629	0.710041	ANKS6	Mus musculus ankyrin repeat and sterile alpha motif domain containing 6 (Anks6), mRNA.	2210417J20Rik; Gm635; Ankrd14; Samd6
1.17718	Ankzf1	89.0472	3.60326	104.825	121.465	0.874314	ANKZF1	Mus musculus ankyrin repeat and zinc finger domain containing 1 (Ankzf1), mRNA.	1300008P06Rik; 2810025E10Rik; D1Ertd161e
0.441999	Anln	259.828	154.311	114.844	142.681	0.464772	ANLN	Mus musculus anillin, actin binding protein (Anln), mRNA.	2900037I21Rik; Scraps; ANILLIN; C78101; 1110037A17Rik
-1.54719	Ano1	-10.9872	9.15265	16.9993	5.10759	0.7554	ANO1	Mus musculus anoctamin 1, calcium activated chloride channel (Ano1), mRNA.	AW559012; AU040576
0.970705	Ano10	57.4796	24.3623	55.7958	46.5693	0.985884	ANO10	Mus musculus anoctamin 10 (Ano10), mRNA.	AI604832; MGC106272
1.52775	Ano4	390.731	45.083	596.941	16.4618	0.0933947	ANO4	Mus musculus anoctamin 4 (Ano4), mRNA.	A330096O15Rik
0.186785	Ano5	-20.6845	12.1638	-3.86354	29.4726	0.852896	ANO5	Mus musculus anoctamin 5 (Ano5), mRNA.	Gdd1; 9330162L24
0.270889	Ano6	481.824	110.101	130.521	20.3337	0.00360984	ANO6	Mus musculus anoctamin 6 (Ano6), mRNA.	2900059G15Rik; AW554778; AA407480; F730003B03Rik
2.29401	Ano7	4.68434	1.31119	10.7459	6.3783	0.946169	ANO7	Mus musculus anoctamin 7 (Ano7), mRNA.	Pcanap5; IPCA-5; NGEP-L; NGEP
0.833205	Anp32a	1168.64	236.886	973.719	48.6619	0.148876	ANP32A	Mus musculus acidic (leucine-rich) nuclear phosphoprotein 32 family, member A (Anp32a), mRNA.	pp32; W91701; PHAP1; I1PP2A; LANP; Anp32
0.955059	Anp32b	523.685	53.9954	500.15	264.731	0.910842	ANP32B	Mus musculus acidic (leucine-rich) nuclear phosphoprotein 32 family, member B (Anp32b), mRNA.	Ssp29; 2410015B15Rik; MGC103080; PAL31; PHAPI2a
0.617675	Anp32e	1579.71	266.844	975.746	121.037	0.0122138	ANP32E	Mus musculus acidic (leucine-rich) nuclear phosphoprotein 32 family, member E (Anp32e), mRNA.	AI326868; AI047746; MGC11640; LANP-L; CPD1; 2810018A15Rik; LANPL; mLANP-L
-0.00741233	Anpep	42.9264	7.61996	-0.318184	2.29829	0.629888	ANPEP	Mus musculus alanyl (membrane) aminopeptidase (Anpep), mRNA.	Apn; Lap-1; Cd13; p150; Lap1
0.570187	Antxr1	213.835	37.1714	121.926	58.1478	0.361777	ANTXR1	Mus musculus anthrax toxin receptor 1 (Antxr1), mRNA.	2310008J16Rik; Antrx1; 2810405N18Rik; Tem8
1.1665	Antxrl	-48.3598	15.4119	-56.4116	13.3613	0.927745	ANTXRL	Mus musculus anthrax toxin receptor-like (Antxrl), mRNA.	1700112N15Rik; 4933430J11
0.161142	Anubl1	-16.5299	19.841	-2.66365	29.7044	0.879128	ANUBL1	Mus musculus AN1, ubiquitin-like, homolog (Xenopus laevis) (Anubl1), mRNA.	2810002D23Rik
-0.389051	Anxa1	103.95	163.329	-40.4419	26.3559	0.323184	ANXA1	Mus musculus annexin A1 (Anxa1), mRNA.	Lpc-1; C430014K04Rik; Anx-A1; Lpc1; Anx-1
0.547005	Anxa10	-84.7242	13.4567	-46.3445	28.2169	0.671017	ANXA10	Mus musculus annexin A10 (Anxa10), transcript variant 2, mRNA.	MGC159022
0.606823	Anxa11	301.046	85.0797	182.682	23.2973	0.282249	ANXA11	Mus musculus annexin A11 (Anxa11), mRNA.	Anx11; A830099O17Rik
0.437113	Anxa13	-54.9016	9.10316	-23.9982	8.27832	0.7283	ANXA13	Mus musculus annexin A13 (Anxa13), mRNA.	AV055219; 1810034H17Rik
0.32643	Anxa2	2183.16	920.866	712.65	150.512	0.0271494	ANXA2	Mus musculus annexin A2 (Anxa2), mRNA.	AW215814; Cal1h
0.355506	Anxa3	373.649	66.0301	132.834	108.134	0.0488777	ANXA3	Mus musculus annexin A3 (Anxa3), mRNA.	Anx3
0.519801	Anxa4	387.946	142.361	201.655	133.103	0.253962	ANXA4	Mus musculus annexin A4 (Anxa4), mRNA.	AW106930; AIV; Xanx-4; AI265406; Anx4
0.441589	Anxa5	1924.2	24.3463	849.707	110.569	7.52869e-12	ANXA5	Mus musculus annexin A5 (Anxa5), mRNA.	Anx5; R74653
0.783905	Anxa6	761.865	47.3655	597.229	55.2618	0.184337	ANXA6	Mus musculus annexin A6 (Anxa6), mRNA.	Camb; Anx6; Cabm; AW107198; AnxVI
0.902563	Anxa7	1354.49	30.369	1222.51	56.723	0.46625	ANXA7	Mus musculus annexin A7 (Anxa7), mRNA.	Anx7; synexin; AI316497; AI265384
0.700001	Anxa8	-59.7435	9.68473	-41.8205	9.20558	0.839447	ANXA8	Mus musculus annexin A8 (Anxa8), mRNA.	MGC40628; Anx8; AI466995
-0.647157	Anxa9	-36.9719	27.706	23.9266	26.0654	0.506382	ANXA9	Mus musculus annexin A9 (Anxa9), transcript variant 2, mRNA.	2310069F17Rik; 1110003P15Rik
0.981329	Aoah	-11.0303	12.265	-10.8244	5.91951	0.998161	AOAH	Mus musculus acyloxyacyl hydrolase (Aoah), mRNA.	MGC107583; 4930433E13Rik
-0.387246	Aoc2	-25.295	13.1308	9.79538	15.2503	0.698847	AOC2	Mus musculus amine oxidase, copper containing 2 (retina-specific) (Aoc2), mRNA.	RAO
0.623994	Aoc3	169.721	78.1199	105.905	104.717	0.616207	AOC3	Mus musculus amine oxidase, copper containing 3 (Aoc3), mRNA.	VAP1; SSAO
0.809932	Aof1	249.502	3.03655	202.079	132.252	0.750103	AOF1	Mus musculus amine oxidase, flavin containing 1 (Aof1), mRNA.	4632428N09Rik; AI482520; MGC38211
1.3072	Aof2	659.183	76.7726	861.684	44.19	0.177402	AOF2	Mus musculus amine oxidase (flavin containing) domain 2 (Aof2), mRNA.	mKIAA0601; 1810043O07Rik; LSD1; D4Ertd478e; AA408884
1.41815	Aox1	-7.96814	6.66881	-11.3	2.48665	0.969967	AOX1
0.448403	Aox3	-8.68673	6.83559	-3.89516	13.2817	0.957283	AOX3	Mus musculus aldehyde oxidase 3 (Aox3), mRNA.	Aoh2; Aoh1; 1200011D03Rik; AI326299
0.970913	Aox3l1	-30.7502	15.0307	-29.8558	10.6567	0.991979	AOX3L1	Mus musculus aldehyde oxidase 3-like 1 (Aox3l1), mRNA.	Aoh3
0.465426	Aox4	-65.4421	3.11898	-30.4584	13.7565	0.693712	AOX4	Mus musculus aldehyde oxidase 4 (Aox4), mRNA.	MGC144190; Aoh2; 2310003G12Rik; MGC144189
1.17711	Ap1b1	2693.36	177.004	3170.39	408.253	0.225532	AP1B1
1.19743	Ap1g1	1307.88	101.668	1566.09	134.495	0.212072	AP1G1	Mus musculus adaptor protein complex AP-1, gamma 1 subunit (Ap1g1), mRNA.	AU041323; D8Ertd374e; Adtg; AW551707; AA409002
4.04336	Ap1g2	25.0869	18.8604	101.436	86.0233	0.588604	AP1G2	Mus musculus adaptor protein complex AP-1, gamma 2 subunit (Ap1g2), mRNA.	Adtg2; G2ad; MGC118107
1.0343	Ap1gbp1	898.763	15.7148	929.591	284.33	0.891115	AP1GBP1	Mus musculus AP1 gamma subunit binding protein 1 (Ap1gbp1), transcript variant 2, mRNA.	L71-5; SYNG; C76297; AF007009
1.60264	Ap1m1	411.183	54.6041	658.976	24.3549	0.0553135	AP1M1	Mus musculus adaptor-related protein complex AP-1, mu subunit 1 (Ap1m1), mRNA.	Adtm1A; AA408894; mu1A; [m]1A; Cltnm; AP47
0.511291	Ap1m2	-44.3511	4.24133	-22.6763	0.823998	0.801273	AP1M2	Mus musculus adaptor protein complex AP-1, mu 2 subunit (Ap1m2), mRNA.	D9Ertd818e; mu1B; [m]1B
0.782173	Ap1s1	453.137	46.8844	354.432	85.8005	0.472486	AP1S1	Mus musculus adaptor protein complex AP-1, sigma 1 (Ap1s1), mRNA.	AP19
0.828463	Ap1s2	239.632	39.0123	198.526	57.3453	0.747233	AP1S2	Mus musculus adaptor-related protein complex 1, sigma 2 subunit (Ap1s2), mRNA.	AI853648; 1500012A13Rik; EST1
0.824176	Ap1s3	203.137	19.4196	167.421	23.1427	0.714357	AP1S3	Mus musculus adaptor-related protein complex AP-1, sigma 3 (Ap1s3), mRNA.	[s]3A; 1190009B22; Jr2
1.3789	Ap2a1	241.098	44.4952	332.45	184.404	0.560833	AP2A1	Mus musculus adaptor protein complex AP-2, alpha 1 subunit (Ap2a1), transcript variant 2, mRNA.	Adtaa
1.42593	Ap2a2	616.454	115.016	879.018	241.76	0.20814	AP2A2	Mus musculus adaptor protein complex AP-2, alpha 2 subunit (Ap2a2), mRNA.	AW146353; C78001; Adtab; AF006990; L25; 2410074K14Rik
1.14766	Ap2b1	858.437	75.9011	985.192	284.501	0.598962	AP2B1	Mus musculus adaptor-related protein complex 2, beta 1 subunit (Ap2b1), transcript variant 1, mRNA.	1300012O03Rik; AI788979
1.15375	Ap2m1	2312.8	184.917	2668.38	873.731	0.577028	AP2M1	Mus musculus adaptor protein complex AP-2, mu1 (Ap2m1), mRNA.	MGC102136
1.01265	Ap2s1	636.188	60.8731	644.233	365.326	0.989056	AP2S1	Mus musculus adaptor-related protein complex 2, sigma 1 subunit (Ap2s1), mRNA.	AI043088; MGC62945
2.48863	Ap3b1	75.1435	19.9123	187.005	24.3234	0.241328	AP3B1	Mus musculus adaptor-related protein complex 3, beta 1 subunit (Ap3b1), mRNA.	C78395; AU015684; Hps2; beta3A; rim2; pearl; pe
1.87174	Ap3b2	588.797	111.345	1102.08	329.193	0.0491273	AP3B2	Mus musculus adaptor-related protein complex 3, beta 2 subunit (Ap3b2), mRNA.	Naptb; beta3B; AU042881; beta-NAP; AI549966; MGC36656; [b]-NAP
1.46388	Ap3d1	1291.07	115.321	1889.97	199.1	0.0176097	AP3D1	Mus musculus adaptor-related protein complex 3, delta 1 subunit (Ap3d1), mRNA.	Ap3d; mh; mocha; Bolvr; mBLVR1; AA407035
1.24132	Ap3m1	126.714	17.9557	157.292	71.9602	0.765484	AP3M1
1.30768	Ap3m2	1636.4	151.603	2139.89	688.621	0.319935	AP3M2	Mus musculus adaptor-related protein complex 3, mu 2 subunit (Ap3m2), mRNA.	5830445E16Rik; AP-3B
0.821512	Ap3s2	570.019	60.2928	468.278	61.7017	0.423574	AP3S2	Mus musculus adaptor-related protein complex 3, sigma 2 subunit (Ap3s2), mRNA.	[s]3B
7.26846	Ap4b1	8.03125	22.18	58.3748	26.7738	0.581908	AP4B1	Mus musculus adaptor-related protein complex AP-4, beta 1 (Ap4b1), mRNA.	1810038H16Rik; AV004952; Ap4b4
5.2793	Ap4m1	9.14486	1.38862	48.2784	13.9992	0.668132	AP4M1	Mus musculus adaptor-related protein complex AP-4, mu 1 (Ap4m1), mRNA.	Ap4m4; 4930443L05Rik
0.863622	Ap4s1	2930.72	27.1664	2531.03	85.3851	0.21577	AP4S1	Mus musculus adaptor-related protein complex AP-4, sigma 1 (Ap4s1), mRNA.	AI314282
2.33515	Apaf1	184.036	66.0162	429.753	149.354	0.0775656	APAF1	Mus musculus apoptotic peptidase activating factor 1 (Apaf1), transcript variant 1, mRNA.	fog; 6230400I06Rik; Apaf-1; KIAA0413; Apaf1l; mKIAA0413
1.28409	Apba1	210.5	50.8646	270.3	78.479	0.585899	APBA1	Mus musculus amyloid beta (A4) precursor protein binding, family A, member 1 (Apba1), mRNA.	X11; Mint; Lin-10; Mint1; 6430513E09Rik; X11alpha
1.12421	Apba2	249.329	18.1944	280.298	57.0719	0.69823	APBA2	Mus musculus amyloid beta (A4) precursor protein-binding, family A, member 2 (Apba2), mRNA.	X11-like; X11L; mXllL; XllL
1.05038	Apba3	237.091	5.0658	249.036	129.228	0.92567	APBA3	Mus musculus amyloid beta (A4) precursor protein-binding, family A, member 3 (Apba3), mRNA.	lin-10; AW208791; Mint-3; X11gamma; mint3
1.02966	Apbb1	5841.46	333.526	6014.71	513.8	0.809979	APBB1	Mus musculus amyloid beta (A4) precursor protein-binding, family B, member 1 (Apbb1), mRNA.	Rir; Fe65
0.516077	Apbb1ip	-35.276	5.69586	-18.2051	17.7962	0.844566	APBB1IP
1.01019	Apbb2	294.07	53.3483	297.065	71.6394	0.977872	APBB2	Mus musculus amyloid beta (A4) precursor protein-binding, family B, member 2 (Apbb2), mRNA.	Zfra; FE65L1; TR2L; 2310007D03Rik; Rirl1
1.94594	Apbb3	153.298	63.0337	298.308	52.0751	0.183724	APBB3	Mus musculus amyloid beta (A4) precursor protein-binding, family B, member 3 (Apbb3), mRNA.	Rirl2; MGC38710; Fe65l2; TR2S
0.780118	Apbh	-45.1355	4.16911	-35.211	2.77585	0.91105	APBH	Mus musculus androgen-binding protein eta (Apbh), mRNA.	Scgb1b1; Mja1l; LGP
1.28631	Apc	407.774	102.472	524.525	6.25513	0.356322	APC
2.34305	Apc2	183.352	41.8468	429.602	263.278	0.236158	APC2	Mus musculus adenomatosis polyposis coli 2 (Apc2), mRNA.	APCL; AI852447; R75424
0.105575	Apcdd1	139.505	5.803	14.7281	9.26089	0.168047	APCDD1	Mus musculus adenomatosis polyposis coli down-regulated 1 (Apcdd1), mRNA.	AB023957; EIG180; Drapc1; AU041258
1.20201	Apcs	43.4065	29.5482	52.1751	40.4059	0.926064	APCS	Mus musculus serum amyloid P-component (Apcs), mRNA.	Sap
1.71676	Apeh	1132.48	129.813	1944.2	35.3018	0.00186981	APEH	Mus musculus acylpeptide hydrolase (Apeh), mRNA.	MGC38101
1.44851	Apex1	160.584	11.9575	232.608	209.074	0.676567	APEX1	Mus musculus apurinic/apyrimidinic endonuclease 1 (Apex1), mRNA.	Ref-1; HAP1; APE; Apex
1.00311	Apex2	20.5056	13.4711	20.5693	9.2209	0.999436	APEX2
0.772093	Aph1a	1147.26	63.6817	885.787	285.211	0.226749	APH1A	Mus musculus anterior pharynx defective 1a homolog (C. elegans) (Aph1a), transcript variant 1, mRNA.	MGC36389; MGC7221; 6530402N02Rik
0.591842	Aph1b	861.5	104.906	509.872	38.7927	0.0090581	APH1B	Mus musculus anterior pharynx defective 1b homolog (C. elegans) (Aph1b), mRNA.	Aph1c; 2310057K14Rik
-5.40438	Aph1c	-5.58166	13.1112	30.1654	26.408	0.692207	APH1C	Mus musculus anterior pharynx defective 1c homolog (C. elegans) (Aph1c), mRNA.	APH-1b; Aph1b; 0610008A10Rik
0.703489	Api5	492.399	35.7612	346.397	50.6923	0.167388	API5	Mus musculus apoptosis inhibitor 5 (Api5), mRNA.	AAC-11; AI196452
0.816312	Apip	285.785	29.6659	233.29	101.313	0.661236	APIP	Mus musculus APAF1 interacting protein (Apip), mRNA.	APIP2; Mmrp19; CGI-29
0.591659	Apitd1	151	20.3822	89.3406	39.2955	0.508972	APITD1	Mus musculus apoptosis-inducing, TAF9-like domain 1 (Apitd1), mRNA.	MGC58422; 2610040C18Rik; 2810407L01Rik
0.980797	Aplf	233.419	70.1979	228.937	35.9565	0.966965	APLF	Mus musculus aprataxin and PNKP like factor (Aplf), mRNA.	AI452191
0.2425	Apln	1258.72	170.125	305.24	224.357	1.16931e-05	APLN	Mus musculus apelin (Apln), mRNA.	6030430G11Rik; Apel
-0.083708	Aplnr	46.2732	63.8527	-3.87344	46.7546	0.629543	APLNR	Mus musculus apelin receptor (Aplnr), mRNA.	msr/apj; APJ
1.00971	Aplp1	1061.73	82.5205	1072.03	553.633	0.979716	APLP1
1.0384	Aplp2	4324.45	209.433	4490.51	671.034	0.756893	APLP2	Mus musculus amyloid beta (A4) precursor-like protein 2 (Aplp2), transcript variant 3, mRNA.	AI790698
0.470741	Apoa1	-64.1747	10.4838	-30.2096	43.8926	0.716218	APOA1	Mus musculus apolipoprotein A-I (Apoa1), mRNA.	Sep-1; Brp-14; Lvtw-1; Sep-2; Sep2; Apoa-1; MGC102525; Ltw-1; Alp-1
0.69111	Apoa1bp	816.154	48.6429	564.052	211.545	0.155242	APOA1BP	Mus musculus apolipoprotein A-I binding protein (Apoa1bp), mRNA.	AI-BP; ESTM37; Apoa1ip; AA087124; AIBP
0.931929	Apoa2	-41.9934	1.45403	-39.1349	17.8488	0.974408	APOA2	Mus musculus apolipoprotein A-II (Apoa2), mRNA.	ApoA-II; Alp-2; Apoa-2; Hdl-1; ApoAII
0.806215	Apoa4	-45.6429	25.0364	-36.7979	5.53231	0.921709	APOA4	Mus musculus apolipoprotein A-IV (Apoa4), mRNA.	Apoa-4
0.655933	Apoa5	-66.9942	1.98893	-43.9437	17.6379	0.795634	APOA5	Mus musculus apolipoprotein A-V (Apoa5), mRNA.	1300007O05Rik; Apoav; RAP3
-3.21345	Apob48r	4.81484	44.2888	-15.4723	0.50427	0.83046	APOB48R	Mus musculus apolipoprotein B48 receptor (Apob48r), mRNA.	Apob-48r
0.137401	Apobec1	138.295	167.088	19.0019	14.518	0.420296	APOBEC1	Mus musculus apolipoprotein B mRNA editing enzyme, catalytic polypeptide 1 (Apobec1), transcript variant 1, mRNA.	Cdar1
-0.583111	Apobec3	27.2993	2.2008	-15.9185	51.0025	0.651076	APOBEC3	Mus musculus apolipoprotein B mRNA editing enzyme, catalytic polypeptide 3 (Apobec3), mRNA.	CEM15; BC003314; MGC7002; Arp3
0.368992	Apoc1	272.583	92.1234	100.581	98.6256	0.163289	APOC1	Mus musculus apolipoprotein C-I (Apoc1), mRNA.
0.566927	Apoc2	163.252	26.5843	92.5518	8.58389	0.407119	APOC2	Mus musculus apolipoprotein C-II (Apoc2), mRNA.	MGC117889
0.444605	Apoc3	-55.7126	4.57145	-24.7701	3.93969	0.727929	APOC3	Mus musculus apolipoprotein C-III (Apoc3), mRNA.	Apoc
1.17146	Apoc4	-22.4839	30.4475	-26.339	17.6271	0.966236	APOC4	Mus musculus apolipoprotein C-IV (Apoc4), mRNA.	Acl
0.167423	Apoe	6305.52	307.031	1055.69	571.431	2.60513e-29	APOE	Mus musculus apolipoprotein E (Apoe), mRNA.	AI255918
0.272898	Apof	83.8238	12.3073	22.8753	21.4895	0.500098	APOF	Mus musculus apolipoprotein F (Apof), mRNA.	AI255964
0.668894	Apoh	-53.7185	14.1132	-35.932	9.69373	0.841266	APOH	Mus musculus apolipoprotein H (Apoh), mRNA.	beta-2-GPI; B2GPI; beta2-GPI
0.919039	Apol7b	-57.8293	19.5084	-53.1474	23.1639	0.9586	APOL7B	Mus musculus apolipoprotein L 7b (Apol7b), mRNA.
0.0708316	Apol7c	-32.6532	12.3069	-2.31288	14.1315	0.734297	APOL7C	Mus musculus apolipoprotein L 7c (Apol7c), mRNA.
0.209269	Apol9b	-46.1721	6.39329	-9.66238	13.196	0.682367	APOL9B	Mus musculus apolipoprotein L 9b (Apol9b), mRNA.
0.47989	Apom	-47.9613	2.88402	-23.0162	13.0884	0.779258	APOM	Mus musculus apolipoprotein M (Apom), mRNA.	G3a; NG20; 1190010O19Rik
0.560253	Apon	-78.7764	16.3829	-44.1347	17.2985	0.697805	APON	Mus musculus apolipoprotein N (Apon), mRNA.	D10Ucla2; AI195275; MGC37850
-4.36826	Apool	2.88382	9.45178	-12.5973	6.93673	0.862455	APOOL	Mus musculus apolipoprotein O-like (Apool), mRNA.	E130106L15Rik; 9430083G14Rik; RP23-436F2.1; 6720473G16Rik
1.15725	App	3509.01	221.979	4060.79	822.918	0.364936	APP
1.5171	Appbp1	871.198	159.868	1321.69	29.5884	0.0434061	APPBP1	Mus musculus amyloid beta precursor protein binding protein 1 (Appbp1), mRNA.	59kDa; MGC36437; MGC36630; MGC29435
0.965333	Appbp2	943.263	143.268	910.563	67.6908	0.852796	APPBP2
1.26312	Appl1	1607.48	92.0606	2030.44	140.041	0.105669	APPL1	Mus musculus adaptor protein, phosphotyrosine interaction, PH domain and leucine zipper containing 1 (Appl1), mRNA.	AW209077; AI585782; DIP13; 7330406P05Rik; BB022931; C88264; 2900057D21Rik
1.20788	Appl2	2293.04	447.829	2769.71	2255.64	0.769743	APPL2	Mus musculus adaptor protein, phosphotyrosine interaction, PH domain and leucine zipper containing 2 (Appl2), mRNA.	Dip3b
0.891715	Aprin	156.834	59.5479	139.851	18.6963	0.867374	APRIN	Mus musculus androgen-induced proliferation inhibitor (Aprin), mRNA.	AW212954; AS3; mKIAA0979; AI646570
0.813136	Aprt	1078.68	399.472	877.114	330.872	0.592982	APRT
-0.306129	Aptx	-22.3982	14.4764	6.85672	34.781	0.749558	APTX	Mus musculus aprataxin (Aptx), transcript variant 1, mRNA.	2410016G21Rik; AA388047
0.181392	Aqp1	82.1703	118.728	14.9051	8.80744	0.7565	AQP1	Mus musculus aquaporin 1 (Aqp1), mRNA.
0.831787	Aqp11	63.711	6.58594	52.994	42.6781	0.895758	AQP11	Mus musculus aquaporin 11 (Aqp11), mRNA.	MGC144512; AI648923; MGC144511; 1700015P13Rik
-0.165118	Aqp12	57.3739	15.2131	-9.47344	16.4766	0.455886	AQP12	Mus musculus aquaporin 12 (Aqp12), mRNA.	MGC130119; mAQP12; MGC130120; AB084104
0.635553	Aqp2	214.918	90.8558	136.592	27.5713	0.486607	AQP2	Mus musculus aquaporin 2 (Aqp2), mRNA.	cph; jpk
0.626445	Aqp3	48.7762	13.1817	30.5556	32.4975	0.842197	AQP3	Mus musculus aquaporin 3 (Aqp3), mRNA.	AQP-2
0.381081	Aqp4	3619.46	202.411	1379.31	989.514	0.00185001	AQP4	Mus musculus aquaporin 4 (Aqp4), mRNA.	MIWC; aquaporin-4; mMIWC
275.015	Aqp5	0.0848876	25.7818	23.3453	41.4588	0.804901	AQP5	Mus musculus aquaporin 5 (Aqp5), mRNA.
0.852301	Aqp6	-45.8094	3.05982	-39.0434	33.0269	0.940882	AQP6	Mus musculus aquaporin 6 (Aqp6), mRNA.	AI790337
1.79782	Aqp7	109.799	0.703138	197.399	170.118	0.801418	AQP7	Mus musculus aquaporin 7 (Aqp7), mRNA.	AQP 7; AQP7L; AQPap
-0.367109	Aqp8	-16.5819	7.82448	6.08737	21.3044	0.803763	AQP8	Mus musculus aquaporin 8 (Aqp8), mRNA.	AI255744
2.14428	Aqp9	-18.7348	14.2108	-40.1728	0.716304	0.809387	AQP9	Mus musculus aquaporin 9 (Aqp9), mRNA.	AI266899
3.23318	Aqr	19.8982	2.95584	64.3345	5.32397	0.611237	AQR	Mus musculus aquarius (Aqr), mRNA.	mKIAA0560; AW495846
1.76485	Ar	92.1241	30.6572	162.585	97.1647	0.534476	AR	Mus musculus androgen receptor (Ar), mRNA.	AW320017; Tfm
2.05589	Araf	57.3843	28.8533	117.976	77.5877	0.587851	ARAF	Mus musculus v-raf murine sarcoma 3611 viral oncogene homolog (Araf), mRNA.	Araf1; AW495444; 1200013E08Rik; A-Raf
-0.140914	Arap1	-7.73245	11.5252	1.08961	8.20995	0.918389	ARAP1	Mus musculus ArfGAP with RhoGAP domain, ankyrin repeat and PH domain 1 (Arap1), transcript variant 2, mRNA.	2410002L19Rik; mKIAA0782
1.14051	Arc	343.797	202.27	392.106	233.836	0.837485	ARC	Mus musculus activity regulated cytoskeletal-associated protein (Arc), mRNA.	arg 3.1; C86064; Arc3.1
1.42988	Arcn1	115.013	30.8153	164.454	115.843	0.685052	ARCN1	Mus musculus archain 1 (Arcn1), mRNA.	MGC27546; 4632432M07Rik; MGC102316
1.30099	Ard1	90.8686	2.71061	118.219	52.2957	0.77615	ARD1
1.09025	Ard1a	673.048	212.423	733.791	339.228	0.837552	ARD1A	Mus musculus ARD1 homolog A, N-acetyltransferase (S. cerevisiae) (Ard1a), mRNA.	Te2; 2310039H09Rik
0.20278	Areg	-45.8911	2.59342	-9.30577	2.51042	0.681769	AREG	Mus musculus amphiregulin (Areg), mRNA.	AR; Sdgf
0.905047	Arf2	1077.52	13.0426	975.203	269.62	0.633813	ARF2	Mus musculus ADP-ribosylation factor 2 (Arf2), mRNA.
0.940972	Arf3	3059.68	236.756	2879.07	249.372	0.635394	ARF3	Mus musculus ADP-ribosylation factor 3 (Arf3), mRNA.	AI854770; 5430400P17Rik
1.02398	Arf4	25.1032	17.0824	25.7052	8.76396	0.994672	ARF4	Mus musculus ADP-ribosylation factor 4 (Arf4), mRNA.	AA407803
0.93388	Arf5	41.3522	3.28022	38.618	26.5384	0.975904	ARF5	Mus musculus ADP-ribosylation factor 5 (Arf5), mRNA.
0.770256	Arf6	1693.33	125.205	1304.3	244.345	0.0677751	ARF6	Mus musculus ADP-ribosylation factor 6 (Arf6), mRNA.	AW496366; MGC102530
1.47659	Arfgap1	725.881	48.4638	1071.83	390.466	0.433523	ARFGAP1	Mus musculus ADP-ribosylation factor GTPase activating protein 1 (Arfgap1), mRNA.	Arf1gap; AI115377
1.25534	Arfgap2	182.419	8.08667	228.999	18.9826	0.636264	ARFGAP2	Mus musculus ADP-ribosylation factor GTPase activating protein 2 (Arfgap2), mRNA.	2310032E02Rik
2.03946	Arfgap3	46.1069	35.6049	94.0329	33.5444	0.61199	ARFGAP3	Mus musculus ADP-ribosylation factor GTPase activating protein 3 (Arfgap3), mRNA.	Arfgap1; 1810035F16Rik; 1810004P07Rik; 9130416J18Rik; 0610009H19Rik
1.07694	Arfip2	180.023	19.2608	193.875	63.3889	0.95598	ARFIP2	Mus musculus ADP-ribosylation factor interacting protein 2 (Arfip2), mRNA.	POR; Por1; 2310002N04Rik
0.730104	Arfl4	397.362	63.5333	290.115	153.487	0.464248	ARFL4	Mus musculus ADP-ribosylation factor 4-like (Arfl4), mRNA.	1110036H21Rik; ARL6; AW456149
1.03359	Arfrp1	225.751	4.32559	233.334	119.363	0.891621	ARFRP1	Mus musculus ADP-ribosylation factor related protein 1 (Arfrp1), mRNA.	MGC6837; 1500006I01Rik; AI480700
-2.16804	Arg1	7.72763	64.8414	-16.7538	7.61404	0.806019	ARG1	Mus musculus arginase 1, liver (Arg1), mRNA.	AI256583; PGIF; AI; Arg-1; arginase I
0.9213	Arg2	172.04	16.4431	158.501	26.9695	0.886427	ARG2	Mus musculus arginase type II (Arg2), mRNA.	AU022422; AII
1.25374	Arglu1	1859.79	51.0782	2331.69	1020.51	0.518198	ARGLU1	Mus musculus arginine and glutamate rich 1 (Arglu1), mRNA.	C130008N12
1.01856	Arhgap1	228.236	50.876	232.473	73.6474	0.931586	ARHGAP1	Mus musculus Rho GTPase activating protein 1 (Arhgap1), mRNA.	B230365D05Rik; p50rhoGAP; MGC7050; MGC101942; C76222
1.23922	Arhgap10	125.965	28.4211	156.099	62.8781	0.752618	ARHGAP10	Mus musculus Rho GTPase activating protein 10 (Arhgap10), mRNA.	A930033B01Rik; PSGAP-s; PSGAP-m
0.991692	Arhgap12	1163.51	12.3974	1153.84	178.393	0.99869	ARHGAP12	Mus musculus Rho GTPase activating protein 12 (Arhgap12), transcript variant 2, mRNA.	2810011M08Rik
1.60841	Arhgap15	-1.27183	15.247	-2.04562	0.805379	0.984698	ARHGAP15	Mus musculus Rho GTPase activating protein 15 (Arhgap15), transcript variant 2, mRNA.	5830480G12Rik
1.41319	Arhgap17	139.188	16.4708	196.7	117.729	0.712356	ARHGAP17	Mus musculus Rho GTPase activating protein 17 (Arhgap17), mRNA.	5730403H17Rik; Rich1; Nadrin; Wbp15
0.648861	Arhgap18	98.0837	33.8765	63.6426	48.9741	0.723106	ARHGAP18	Mus musculus Rho GTPase activating protein 18 (Arhgap18), mRNA.	AI314906; 4833419J07Rik; AI843501
0.748899	Arhgap19	-18.8755	19.8527	-14.1359	10.967	0.957847	ARHGAP19	Mus musculus Rho GTPase activating protein 19 (Arhgap19), mRNA.	FLJ00368; 4933411B03Rik; mFLJ00368; AW546831; AI120128
1.71824	Arhgap20	307.876	28.4613	529.005	50.3228	0.056172	ARHGAP20	Mus musculus Rho GTPase activating protein 20 (Arhgap20), mRNA.	mKIAA1391; A530023E23Rik; 6530403F17Rik
1.14947	Arhgap22	90.2524	34.3582	103.743	12.163	0.886534	ARHGAP22	Mus musculus Rho GTPase activating protein 22 (Arhgap22), mRNA.	MGC47316; p68RacGAP; B230341L19Rik; RHOGAP2
0.994996	Arhgap24	481.966	33.7881	479.554	175.669	0.679009	ARHGAP24	Mus musculus Rho GTPase activating protein 24 (Arhgap24), transcript variant 1, mRNA.	0610025G21Rik; MGC38749
0.722749	Arhgap25	113.936	57.9111	82.3469	43.5944	0.828456	ARHGAP25	Mus musculus Rho GTPase activating protein 25 (Arhgap25), transcript variant 2, mRNA. XM_899325 XM_899332 XM_899339 XM_899344 XM_914946 XM_923470 XM_923471 XM_923481 XM_923488 XM_923492 XM_923496 XM_923499 XM_923504	A130039I20Rik
1.4055	Arhgap26	1696.75	40.1738	2384.79	275.8	0.0206685	ARHGAP26	Mus musculus Rho GTPase activating protein 26 (Arhgap26), mRNA.	1810044B20Rik; mKIAA0621; AI853435; 4933432P15Rik; 2610010G17Rik
2.76106	Arhgap27	35.3777	19.0777	97.6799	80.8503	0.554756	ARHGAP27	Mus musculus Rho GTPase activating protein 27 (Arhgap27), transcript variant 1, mRNA.	2310069I04Rik; MGC62780
0.551535	Arhgap28	120.634	6.18227	66.5337	23.7892	0.554774	ARHGAP28	Mus musculus Rho GTPase activating protein 28 (Arhgap28), mRNA.	AU044757; E130310N06; AW550892
0.836003	Arhgap29	986.006	166.62	824.304	515.02	0.680476	ARHGAP29	Mus musculus Rho GTPase activating protein 29 (Arhgap29), mRNA.	C76601; A830014I19; Parg1; 6720461J18Rik; B130017I01Rik; AU040217
0.612185	Arhgap30	307.454	113.903	188.219	126.257	0.422864	ARHGAP30	Mus musculus Rho GTPase activating protein 30 (Arhgap30), mRNA.	FLJ00267; mFLJ00267; Gm102; 6030405P05Rik; MGC99989
-12.0932	Arhgap4	-8.54809	23.6199	103.374	91.7805	0.310258	ARHGAP4	Mus musculus Rho GTPase activating protein 4 (Arhgap4), mRNA.	mKIAA0131; A530015A20Rik; MGC124367; MGC124368; A130009C12Rik; c1
0.59348	Arhgap5	285.412	126.495	169.386	119.676	0.442626	ARHGAP5	Mus musculus Rho GTPase activating protein 5 (Arhgap5), mRNA.	p190-B
-4.4765	Arhgap6	-5.41802	15.0278	24.2538	20.8488	0.750142	ARHGAP6	Mus musculus Rho GTPase activating protein 6 (Arhgap6), transcript variant 2, mRNA.	AI504284; RhoGAPX-1; C130038E13
0.507301	Arhgap8	-44.5867	11.6493	-22.6189	11.9696	0.805076	ARHGAP8	Mus musculus Rho GTPase activating protein 8 (Arhgap8), mRNA.	AI430858
-1.89848	Arhgap9	9.67305	34.0658	-18.3641	24.3671	0.761766	ARHGAP9	Mus musculus Rho GTPase activating protein 9 (Arhgap9), mRNA. XM_986639 XM_986675 XM_986715	MGC37568; AU043488
0.313994	Arhgdib	251.03	138.172	78.8218	2.94588	0.205952	ARHGDIB	Mus musculus Rho, GDP dissociation inhibitor (GDI) beta (Arhgdib), mRNA.	Ly-GDI; Gdid4; D4
1.41836	Arhgdig	484.597	5.75006	687.331	149.334	0.147135	ARHGDIG	Mus musculus Rho GDP dissociation inhibitor (GDI) gamma (Arhgdig), mRNA.	Rho-GDI-3; Gdi5; RIP2; Rho-GDI2
1.81162	Arhgef1	61.1627	19.7004	110.803	34.5666	0.585955	ARHGEF1	Mus musculus Rho guanine nucleotide exchange factor (GEF) 1 (Arhgef1), mRNA.	Lsc; Lbcl2
0.570142	Arhgef10	301.444	50.88	171.866	99.2125	0.266084	ARHGEF10	Mus musculus Rho guanine nucleotide exchange factor (GEF) 10 (Arhgef10), transcript variant 1, mRNA.	6430549H08Rik; KIAA0294; mKIAA0294
0.774253	Arhgef10l	62.3643	32.1052	48.2858	10.3174	0.861978	ARHGEF10L	Mus musculus Rho guanine nucleotide exchange factor (GEF) 10-like (Arhgef10l), mRNA.	2810441C07Rik; mKIAA1626
1.21234	Arhgef15	438.242	60.7734	531.296	198.113	0.608732	ARHGEF15	Mus musculus Rho guanine nucleotide exchange factor (GEF) 15 (Arhgef15), mRNA.	MGC144141; MGC102247; MGC144142; D530030K12Rik; D130071N09; RP23-396M19.6
1.54562	Arhgef18	536.648	42.6692	829.453	175.943	0.059089	ARHGEF18	Mus musculus rho/rac guanine nucleotide exchange factor (GEF) 18 (Arhgef18), mRNA.	D030053O22Rik; AI467246
1.20964	Arhgef19	68.7565	25.1889	83.1709	11.7693	0.876142	ARHGEF19	Mus musculus Rho guanine nucleotide exchange factor (GEF) 19 (Arhgef19), mRNA.	WGEF; 6430573B13Rik; 6030432F23
1.42309	Arhgef2	55.7044	7.34786	79.2723	30.4738	0.796992	ARHGEF2	Mus musculus rho/rac guanine nucleotide exchange factor (GEF) 2 (Arhgef2), mRNA.	P40; GEF; LFP40; mKIAA0651; AA408978; Lfc; Lbcl1; GEF-H1; GEFH1
0.929889	Arhgef3	1571	85.7302	1460.85	25.7064	0.591352	ARHGEF3	Mus musculus Rho guanine nucleotide exchange factor (GEF) 3 (Arhgef3), mRNA.	1200004I24Rik; 9830169H03Rik; C76747
1.25959	Arhgef4	740.439	25.2059	932.649	93.8858	0.200975	ARHGEF4	Mus musculus Rho guanine nucleotide exchange factor (GEF) 4 (Arhgef4), mRNA.	9330140K16Rik; Asef
1.11604	Arhgef6	220.9	10.0501	246.533	8.14197	0.768699	ARHGEF6	Mus musculus Rac/Cdc42 guanine nucleotide exchange factor (GEF) 6 (Arhgef6), mRNA.	4930592P22Rik; 1700038J06Rik; 1600028C08Rik
1.07128	Arhgef7	159.3	60.3222	170.655	77.2322	0.919033	ARHGEF7	Mus musculus Rho guanine nucleotide exchange factor (GEF7) (Arhgef7), mRNA.	Pak3bp; betaPix-b; PIX; mKIAA0142; Cool; betaPix-c; p85SPR; p85Cool1
1.3108	Arid1a	158.211	30.2906	207.383	9.20861	0.614404	ARID1A	Mus musculus AT rich interactive domain 1A (SWI-like) (Arid1a), mRNA.	Osa1; Smarcf1; 1110030E03Rik
1.64237	Arid2	167.462	23.6813	275.033	79.4609	0.345641	ARID2	Mus musculus AT rich interactive domain 2 (ARID, RFX-like) (Arid2), mRNA.	4432409D24Rik; zipzap/p200
0.921688	Arid3a	412.102	108.241	379.829	157.099	0.840986	ARID3A
0.433299	Arid3b	-32.4266	3.30267	-14.0504	7.91266	0.836771	ARID3B	Mus musculus AT rich interactive domain 3B (BRIGHT-like) (Arid3b), mRNA.	MGC59291; Bdp; Dri2
0.147707	Arid3c	-28.2375	13.4032	-4.17088	10.1681	0.787715	ARID3C	Mus musculus AT rich interactive domain 3C (Bright like) (Arid3c), mRNA.
1.40203	Arid4a	495.384	18.3659	694.541	135.739	0.133708	ARID4A	Mus musculus AT rich interactive domain 4A (RBP1-like) (Arid4a), mRNA.	A630009N03; A630067N03Rik; MmRBBP1; Rbbp1
1.44336	Arid4b	372.855	16.2491	538.164	190.22	0.342615	ARID4B	Mus musculus AT rich interactive domain 4B (RBP1-like) (Arid4b), transcript variant 2, mRNA.	BCAA; 6720480E17Rik; 5930400I17; BRCAA1; 6330417L24Rik; SAP180; Rbp1l1; RBBP1L1; 9330186M13
-0.422873	Arid5a	-24.6286	31.097	10.4147	21.8244	0.702282	ARID5A	Mus musculus AT rich interactive domain 5A (MRF1-like) (Arid5a), mRNA.	Mrf1; D430024K22Rik; MGC36895
1.44851	Arid5b	137.868	98.6639	199.704	77.6582	0.62008	ARID5B	Mus musculus AT rich interactive domain 5B (MRF1-like) (Arid5b), mRNA.	Mrf2; Mrf2alpha; AI467247; 4930580B11; Mrf2beta; Desrt; 5430435G07Rik
1.02098	Arih1	294.099	86.1872	300.269	47.9288	0.957875	ARIH1	Mus musculus ariadne ubiquitin-conjugating enzyme E2 binding protein homolog 1 (Drosophila) (Arih1), mRNA.	ARI; HHARI; UBCH7BP; AU021774; UIP77; Ari1; HARI
1.12367	Arih2	439.284	72.3109	493.61	0.830291	0.65752	ARIH2	Mus musculus ariadne homolog 2 (Drosophila) (Arih2), mRNA.	UIP48; TRIAD1; AI843547; ARI2
0.834857	Arl1	3692.96	204.955	3083.09	635.774	0.204261	ARL1	Mus musculus ADP-ribosylation factor-like 1 (Arl1), mRNA.	AU019749; 2310008D22Rik
3.70427	Arl10	78.6271	3.16972	291.256	234.15	0.257671	ARL10	Mus musculus ADP-ribosylation factor-like 10 (Arl10), mRNA.	Arl10a; MGC144317; Arm1
-0.231738	Arl11	84.8598	152.819	-19.6652	3.59787	0.454211	ARL11	Mus musculus ADP-ribosylation factor-like 11 (Arl11), mRNA.	ARLTS1; C730007L20Rik
1.17237	Arl16	249.131	40.3779	292.074	99.9954	0.711585	ARL16	Mus musculus ADP-ribosylation factor-like 16 (Arl16), mRNA.	2600005N12Rik
1.21979	Arl2	493.191	19.0354	601.592	451.575	0.744216	ARL2	Mus musculus ADP-ribosylation factor-like 2 (Arl2), mRNA.	AW553335; 2610009M23Rik; AI115441
0.616416	Arl2bp	805.055	77.5239	496.249	139.375	0.0419307	ARL2BP	Mus musculus ADP-ribosylation factor-like 2 binding protein (Arl2bp), transcript variant 1, mRNA.	6330544B05Rik; Bart1; 1700027H16Rik; 1700010P10Rik; AI482273; AI849834
0.691075	Arl3	1795.83	184.129	1241.05	66.3448	0.0154479	ARL3	Mus musculus ADP-ribosylation factor-like 3 (Arl3), mRNA.
0.811875	Arl4a	126.226	22.9062	102.48	40.8799	0.850164	ARL4A	Mus musculus ADP-ribosylation factor-like 4A (Arl4a), transcript variant 1, mRNA.	Arl4; AI467555
1.93518	Arl4c	199.398	13.4616	385.872	300.344	0.418387	ARL4C	Mus musculus ADP-ribosylation factor-like 4C (Arl4c), mRNA.	LAK; Arl7; A630084M22Rik
0.594818	Arl4d	210.886	12.6318	125.439	27.4323	0.36268	ARL4D	Mus musculus ADP-ribosylation factor-like 4D (Arl4d), mRNA.	MGC28743; Arf4l; 1110036H21Rik; Arl5; ARL6; Arfl4; AW456149
0.733412	Arl5a	1913.79	221.301	1403.59	307.748	0.0704091	ARL5A	Mus musculus ADP-ribosylation factor-like 5A (Arl5a), mRNA.	T25534; AW610751; 2410015N24Rik; Arl5; 2810410P22Rik; AA408731
0.758173	Arl5b	719.752	95.04	545.697	30.6563	0.191237	ARL5B	Mus musculus ADP-ribosylation factor-like 5B (Arl5b), mRNA.	AW146430; Arl8; 4930587A11Rik
1.66017	Arl5c	-17.2321	3.48384	-28.6082	11.4795	0.898329	ARL5C	Mus musculus ADP-ribosylation factor-like 5C (Arl5c), mRNA.	Arl12; MGC73657; BC065791
1.11183	Arl6	354.119	7.30245	393.721	99.3417	0.729667	ARL6	Mus musculus ADP-ribosylation factor-like 6 (Arl6), mRNA.	1110018H24Rik; 2210411E14Rik
0.924687	Arl6ip1	4683.01	24.0405	4330.32	1121.03	0.66464	ARL6IP1	Mus musculus ADP-ribosylation factor-like 6 interacting protein 1 (Arl6ip1), mRNA.	AU042858; C85138; mKIAA0069; Aip-1; AL022945; ARMER; Arl6ip; AIP-6
1.14365	Arl6ip4	1282.84	12.043	1467.13	294.532	0.489279	ARL6IP4	Mus musculus ADP-ribosylation factor-like 6 interacting protein 4 (Arl6ip4), mRNA.	AA408210; AA408365; Aip-4; Srp25
0.792153	Arl6ip5	499.686	81.8484	395.828	207.799	0.488537	ARL6IP5	Mus musculus ADP-ribosylation factor-like 6 interacting protein 5 (Arl6ip5), mRNA.	5930404D22Rik; Gtrap3-18; AV001879; Aip-5
0.89098	Arl6ip6	102.368	54.4468	91.2076	22.8539	0.91006	ARL6IP6	Mus musculus ADP-ribosylation factor-like 6 interacting protein 6 (Arl6ip6), mRNA.	Aip-6; 2610529A11Rik; 2310057C01Rik
1.09532	Arl8a	3131.06	377.648	3429.52	815.22	0.641646	ARL8A	Mus musculus ADP-ribosylation factor-like 8A (Arl8a), mRNA.	Arl10b; 1110033P22Rik; gie2
0.947248	Arl8b	2916.11	12.4504	2762.28	845.718	0.80197	ARL8B	Mus musculus ADP-ribosylation factor-like 8B (Arl8b), mRNA.	gie1; Arl10c; 3100002J04Rik; 2610313E07Rik
0.77023	Arl9	47.8605	29.267	36.8636	1.3624	0.904771	ARL9	Mus musculus ADP-ribosylation factor-like 9 (Arl9), mRNA.	1700110A09Rik
1.02728	Armc10	784.626	297.448	806.034	164.472	0.933308	ARMC10	Mus musculus armadillo repeat containing 10 (Armc10), mRNA.	Svh; 2810037C14Rik
0.384274	Armc3	110.585	14.0156	42.495	47.8088	0.474065	ARMC3	Mus musculus armadillo repeat containing 3 (Armc3), mRNA.	4921513G22Rik
0.404867	Armc5	372.68	142.426	150.886	28.2957	0.105615	ARMC5	Mus musculus armadillo repeat containing 5 (Armc5), mRNA.	BC032200; MGC102240; MGC36606; AW049683
1.2013	Armc6	107.28	6.68872	128.875	9.98891	0.822016	ARMC6	Mus musculus armadillo repeat containing 6 (Armc6), mRNA.	2410153K17Rik; MGC67564; AW554412
1.21617	Armc7	85.2922	20.5616	103.73	53.8158	0.848662	ARMC7	Mus musculus armadillo repeat containing 7 (Armc7), mRNA.	RP23-392H19.6; MGC27721; A630084C13; BC023126
1.17567	Armc8	1140.51	113.336	1340.87	100.993	0.455495	ARMC8	Mus musculus armadillo repeat containing 8 (Armc8), mRNA.	HSPC056; 1200015K23Rik
2.35403	Armc9	46.6141	9.68871	109.731	40.5873	0.515876	ARMC9	Mus musculus armadillo repeat containing 9 (Armc9), transcript variant 1, mRNA.	4930438O05Rik; 5730415N24Rik; 3830422A13Rik; 4831423D23Rik
1.07111	Armcx1	786.194	76.3589	842.101	201.705	0.750582	ARMCX1	Mus musculus armadillo repeat containing, X-linked 1 (Armcx1), mRNA.	3010033I09Rik; ALEX1
1.20594	Armcx2	1286.11	123.998	1550.97	430.304	0.420147	ARMCX2	Mus musculus armadillo repeat containing, X-linked 2 (Armcx2), mRNA.	ALEX2; 3230401N03Rik; AI043003
1.00009	Armcx3	2075.95	44.417	2076.14	12.6777	0.999427	ARMCX3	Mus musculus armadillo repeat containing, X-linked 3 (Armcx3), mRNA.	ALEX3; 1200004E24Rik; AI450003
1.269	Armcx5	112.444	24.3412	142.692	69.6663	0.766756	ARMCX5	Mus musculus armadillo repeat containing, X-linked 5 (Armcx5), mRNA.	AW556585; MGC38735
1.14573	Armcx6	333.788	55.3275	382.431	131.061	0.916045	ARMCX6	Mus musculus armadillo repeat containing, X-linked 6 (Armcx6), mRNA.	MGC27863; AW060994
0.537171	Armet	621.489	148.187	333.846	47.0241	0.0486094	ARMET	Mus musculus arginine-rich, mutated in early stage tumors (Armet), mRNA.	AA408789; AA673178; AA407711; 3230402M22Rik; D18Mgi17; D17914
-1.91297	Armetl1	-15.1153	12.8292	28.9152	33.8976	0.630393	ARMETL1	Mus musculus arginine-rich, mutated in early stage tumors-like 1 (Armetl1), mRNA.	9330140G23; MGC129430
1.83904	Arnt	77.8323	29.0976	143.137	72.7281	0.529911	ARNT	Mus musculus aryl hydrocarbon receptor nuclear translocator (Arnt), transcript variant 2, mRNA.	W08714; mKIAA4051; Hif1b; ESTM42; Drnt; D3Ertd557e; KIAA4051
1.05288	Arnt2	1016.8	21.8988	1070.58	232.572	0.778811	ARNT2	Mus musculus aryl hydrocarbon receptor nuclear translocator 2 (Arnt2), mRNA.	Hif-2b; mKIAA0307
0.598895	Arntl	189.223	22.2719	113.325	89.4037	0.488079	ARNTL	Mus musculus aryl hydrocarbon receptor nuclear translocator-like (Arntl), mRNA.	Bmal1; MOP3; bmal1b'; BMAL1b; Arnt3
4.6006	Arntl2	15.7351	8.55329	72.391	122.156	0.646741	ARNTL2	Mus musculus aryl hydrocarbon receptor nuclear translocator-like 2 (Arntl2), mRNA.	CLIF; BMAL2; MOP9; 4632430A05Rik; MGC124257
0.937966	Arpc1a	543.763	19.8754	510.031	220.628	0.862722	ARPC1A	Mus musculus actin related protein 2/3 complex, subunit 1A (Arpc1a), mRNA.	1110030K07Rik; Sid329; 41kDa; 0610010H08Rik; AA407347; Sid32
0.500492	Arpc1b	831.828	347.648	416.323	155.587	0.178521	ARPC1B	Mus musculus actin related protein 2/3 complex, subunit 1B (Arpc1b), mRNA.	SOP2Hs; AA408534; MGC102425; p41-ARC; AA408064; L72; AW208418; AF007010; 41kDa; AA571392
0.730476	Arpc3	2132.49	455.576	1557.73	704.919	0.338033	ARPC3	Mus musculus actin related protein 2/3 complex, subunit 3 (Arpc3), mRNA.	p21Arc; p21-Ar; 1110006A04Rik; AI788639; AA408672; 21kDa
0.703218	Arpc4	920.044	118.784	646.991	271.001	0.228674	ARPC4	Mus musculus actin related protein 2/3 complex, subunit 4 (Arpc4), mRNA.	p20-Arc; 20kDa; AI327076; 5330419I20Rik
0.787057	Arpc5	1937.9	242.042	1525.24	155.483	0.0912608	ARPC5	Mus musculus actin related protein 2/3 complex, subunit 5 (Arpc5), mRNA.	165kDa; 5830443F10Rik; p16-Arc
0.919129	Arpc5l	1521.92	23.1267	1398.85	89.0151	0.536053	ARPC5L	Mus musculus actin related protein 2/3 complex, subunit 5-like (Arpc5l), mRNA.	AW742746; AW555592; ARC16-2; AI852867; 2010015J01Rik
0.3249	Arpm1	-51.1952	2.04583	-16.6334	15.6888	0.69804	ARPM1	Mus musculus actin related protein M1 (Arpm1), mRNA.	MGC130225; 1700119I24Rik
0.716212	Arpp19	655.497	22.7931	469.475	50.6172	0.104065	ARPP19	Mus musculus cAMP-regulated phosphoprotein 19 (Arpp19), mRNA.	ARPP-19; Arpp12; 19kDa; AW559096
1.37845	Arpp21	120.858	40.945	166.597	58.14	0.623246	ARPP21	Mus musculus cyclic AMP-regulated phosphoprotein, 21 (Arpp21), transcript variant 2, mRNA.	ARPP-21; 0710001E13Rik; AI853636; D9Bwg1012e; Tarpp
-0.519362	Arr3	-5.23566	3.57068	2.7192	19.6491	0.931204	ARR3	Mus musculus arrestin 3, retinal (Arr3), mRNA.	CAR; mCARFL; mCAR
1.15885	Arrb1	1266.09	2.85706	1467.21	183.158	0.407014	ARRB1	Mus musculus arrestin, beta 1 (Arrb1), transcript variant a, mRNA.	1200006I17Rik; AW208571; MGC124269; MGC124270; G430100A01Rik
1.30864	Arrb2	437.631	154.973	572.702	281.045	0.578727	ARRB2	Mus musculus arrestin, beta 2 (Arrb2), mRNA.	RP23-42P20.7; AI326910; AW122872
0.257267	Arrdc1	-60.0622	0.799678	-15.452	9.5775	0.616488	ARRDC1	Mus musculus arrestin domain containing 1 (Arrdc1), mRNA.	BC004091; AI957342; MGC28029
1.14112	Arrdc2	234.454	17.5662	267.539	174.482	0.828262	ARRDC2	Mus musculus arrestin domain containing 2 (Arrdc2), mRNA.	4632416I05Rik; Ilad1
0.793847	Arrdc3	877.092	78.3907	696.277	210.18	0.318361	ARRDC3
1.05514	Arrdc4	284.808	21.8872	300.511	173.512	0.917806	ARRDC4	Mus musculus arrestin domain containing 4 (Arrdc4), transcript variant 1, mRNA.	AV216361; 2410003C09Rik
1.51815	Ars2	513.797	62.6908	780.021	97.3854	0.0552322	ARS2	Mus musculus arsenate resistance protein 2 (Ars2), mRNA.	ASR2B; ASR2D; ASR2A; Asr2; ASR2C
0.950253	Arsa	881.739	143.362	837.875	205.143	0.824214	ARSA	Mus musculus arylsulfatase A (Arsa), mRNA.	AW212749; ASA; C230037L18Rik; As-2; AS-A; As2; TISP73
0.61062	Arsb	497.938	20.1252	304.051	24.5334	0.0683246	ARSB	Mus musculus arylsulfatase B (Arsb), mRNA.	As-1r; Asr-1; As-1t; As1-r; 1110007C02Rik; As1-s; As-1; As1-t; As-1s; Ast-1; As1; AI480648
0.200236	Arsg	422.899	50.3391	84.6796	77.3862	0.00196416	ARSG	Mus musculus arylsulfatase G (Arsg), mRNA.	AI846872; MGC90567; 6330406P08Rik
-0.107201	Arsi	-27.8464	30.9616	2.98517	20.6753	0.736203	ARSI	Mus musculus arylsulfatase i (Arsi), mRNA.	BC020108
-0.0162696	Arsj	-48.029	1.1864	0.781413	34.4155	0.557283	ARSJ	Mus musculus arylsulfatase J (Arsj), mRNA.	D830047F08; 9330196J05Rik
0.541398	Arsk	31.5574	3.71777	17.0851	26.525	0.872915	ARSK	Mus musculus arylsulfatase K (Arsk), mRNA.	4833414G15Rik; 2810429K17Rik
0.87801	Art1	-60.6625	19.8649	-53.2623	21.1988	0.934459	ART1	Mus musculus ADP-ribosyltransferase 1 (Art1), mRNA.	ADPRT
0.828722	Art2a	-39.7258	21.1908	-32.9216	13.5182	0.939434	ART2A	Mus musculus ADP-ribosyltransferase 2a (Art2a), mRNA.	Rt-6; Ly92a; Rt6; Rt6-1
0.71638	Art2b	-54.0821	0.728993	-38.7433	1.52601	0.8628	ART2B	Mus musculus ADP-ribosyltransferase 2b (Art2b), mRNA.	Rt-6; Rt6-2; ART2.2; Art; Rt6; Ly92b
1.02169	Art3	73.2082	6.67379	74.7963	28.4926	0.996777	ART3	Mus musculus ADP-ribosyltransferase 3 (Art3), mRNA.	4930569O04Rik
0.371639	Art4	-31.0551	29.9802	-11.5413	19.1046	0.830475	ART4	Mus musculus ADP-ribosyltransferase 4 (Art4), mRNA.	DOK1; 4432404K01Rik; DO
0.823347	Art5	176.833	41.7862	145.595	48.9735	0.751706	ART5	Mus musculus ADP-ribosyltransferase 5 (Art5), mRNA.	MGC151200; MGC151226; Yac-2
0.349114	Artn	-43.5167	13.5927	-15.1923	26.0674	0.748591	ARTN	Mus musculus artemin (Artn), mRNA.	neublastin
-0.740821	Arv1	-4.97215	13.2654	3.68348	17.1447	0.923046	ARV1	Mus musculus ARV1 homolog (yeast) (Arv1), mRNA.	AW121084; 1110067L22Rik; AI461928
0.280372	Arvcf	-54.2261	15.7223	-15.2035	17.1665	0.661929	ARVCF	Mus musculus armadillo repeat gene deleted in velo-cardio-facial syndrome (Arvcf), mRNA.
0.539665	Arx	90.1137	79.5256	48.6312	48.4304	0.705051	ARX	Mus musculus aristaless related homeobox (Arx), mRNA.
1.29329	As3mt	206.168	2.61957	266.636	65.0888	0.55025	AS3MT
0.751679	Asah1	815.972	112.421	613.349	0.669405	0.230046	ASAH1	Mus musculus N-acylsphingosine amidohydrolase 1 (Asah1), mRNA.	AC; 2310081N20Rik; AU044555; Asah; AL022942
0.944411	Asah2	357.788	6.29731	337.898	134.878	0.879806	ASAH2	Mus musculus N-acylsphingosine amidohydrolase 2 (Asah2), mRNA.	AI585898
1.2625	Asah3	1005.46	115.756	1269.39	509.106	0.696084	ASAH3	Mus musculus N-acylsphingosine amidohydrolase (alkaline ceramidase) 3 (Asah3), mRNA.	AI662009; Cer1; 2310024P18Rik
0.53294	Asah3l	1575.64	100.543	839.725	777.301	0.189664	ASAH3L	Mus musculus N-acylsphingosine amidohydrolase 3-like (Asah3l), mRNA.	CRG-L1; Acer2; maCER2; RP24-468M3.3; 2410116I05Rik
1.03868	Asap3	273.499	77.1807	284.079	125.96	0.938145	ASAP3	Mus musculus ArfGAP with SH3 domain, ankyrin repeat and PH domain 3 (Asap3), mRNA.	Gm140; 9430088F20Rik; MGC102639; UPLC1
-5.07653	Asb1	-5.00026	12.3298	25.384	42.9904	0.755657	ASB1	Mus musculus ankyrin repeat and SOCS box-containing 1 (Asb1), transcript variant 2, mRNA.	AI426616; mKIAA1146; AI851378; 1700054C17Rik; 1700029O08Rik
0.664667	Asb10	50.5064	5.50007	33.5699	4.34707	0.851469	ASB10	Mus musculus ankyrin repeat and SOCS box-containing protein 10 (Asb10), mRNA.	Asb-10; BB137407
1.04562	Asb11	-50.674	1.83849	-52.9859	16.1034	0.979255	ASB11	Mus musculus ankyrin repeat and SOCS box-containing 11 (Asb11), mRNA.	1110067L12Rik; 1600009D24Rik
0.696437	Asb12	-32.2625	26.903	-22.4688	10.6022	0.913786	ASB12	Mus musculus ankyrin repeat and SOCS box-containing protein 12 (Asb12), mRNA.	Asb-12; 2310036C05Rik; MGC130200
0.890578	Asb13	887.084	9.54908	790.017	40.2321	0.261944	ASB13	Mus musculus ankyrin repeat and SOCS box-containing 13 (Asb13), mRNA.	2210015B19Rik; Asb-13; 6430573K02Rik; C85285
0.708171	Asb15	-75.0132	12.096	-53.1222	11.9964	0.804676	ASB15	Mus musculus ankyrin repeat and SOCS box-containing 15 (Asb15), mRNA.	4930400E23Rik; Asb-15
1.1066	Asb16	186.546	16.195	206.432	98.3967	0.860603	ASB16
0.733225	Asb17	-58.1722	9.83041	-42.6533	7.90297	0.861107	ASB17	Mus musculus ankyrin repeat and SOCS box-containing 17 (Asb17), mRNA.	4933436O18Rik
0.482378	Asb18	-61.423	15.7898	-29.6291	9.27965	0.721027	ASB18	Mus musculus ankyrin repeat and SOCS box-containing 18 (Asb18), mRNA.	Asb-18
0.924176	Asb2	71.6005	0.478969	66.1714	29.826	0.952603	ASB2	Mus musculus ankyrin repeat and SOCS box-containing 2 (Asb2), mRNA.	1110008E15Rik
2.30458	Asb3	20.7917	7.39597	47.916	19.7008	0.777598	ASB3	Mus musculus ankyrin repeat and SOCS box-containing 3 (Asb3), mRNA.	2400011J03Rik
1.4845	Asb4	95.4075	71.767	141.633	127.534	0.811131	ASB4
0.522935	Asb5	-60.3408	6.29447	-31.5543	2.93362	0.7459	ASB5	Mus musculus ankyrin repeat and SOCs box-containing 5 (Asb5), mRNA.	MGC118455; 1110018D09Rik
1.57627	Asb6	40.528	22.0453	63.8831	41.7391	0.788437	ASB6	Mus musculus ankyrin repeat and SOCS box-containing 6 (Asb6), mRNA.	2510004M11Rik; AA409356
0.737234	Asb7	-9.62854	0.141745	-7.09849	6.3684	0.979428	ASB7	Mus musculus ankyrin repeat and SOCS box-containing protein 7 (Asb7), transcript variant 2, mRNA.	Asb-7; AI449039; D030055C23Rik
0.925081	Asb8	3078.84	422.715	2848.18	620.375	0.668117	ASB8	Mus musculus ankyrin repeat and SOCS box-containing 8 (Asb8), mRNA.	C430011H06Rik; AI788835; 4930539L19Rik
2.70831	Asb9	3.80123	6.57545	10.2949	17.3498	0.94233	ASB9	Mus musculus ankyrin repeat and SOCS box-containing 9 (Asb9), mRNA.	1700011M07Rik
1.52708	Ascc1	144.152	57.4423	220.131	119.896	0.594742	ASCC1	Mus musculus activating signal cointegrator 1 complex subunit 1 (Ascc1), mRNA.	CGI-18; ASC1p50; AI550520; 1810015P09Rik
1.27697	Ascc2	149.346	28.8137	190.71	96.7869	0.712135	ASCC2	Mus musculus activating signal cointegrator 1 complex subunit 2 (Ascc2), mRNA.	ASC1p100; 2610034L15Rik; RP23-280J3.3; AI482016; AW046480; 1700011I11Rik; FLJ21588
1.34564	Ascc3l1	1892.77	233.121	2546.99	205.451	0.0604764	ASCC3L1	Mus musculus activating signal cointegrator 1 complex subunit 3-like 1 (Ascc3l1), mRNA.	U5-200-KD; A330064G03Rik; KIAA0788; HELIC2; U5-200KD; BC011390
0.763698	Ascl1	-37.0511	24.8972	-28.2959	27.2953	0.923706	ASCL1	Mus musculus achaete-scute complex homolog 1 (Drosophila) (Ascl1), mRNA.	ASH1; AI225900; Mash1
1.3426	Ascl2	228.924	7.47484	307.354	274.201	0.713482	ASCL2	Mus musculus achaete-scute complex homolog 2 (Drosophila) (Ascl2), mRNA.	2410083I15Rik; Mash2
0.642511	Ascl3	-61.677	15.204	-39.6282	26.9764	0.807111	ASCL3	Mus musculus achaete-scute complex homolog 3 (Drosophila) (Ascl3), mRNA.	MGC129412; Sgn1; MGC129413
1.47506	Asf1a	26.0327	23.6697	38.3997	33.6595	0.893432	ASF1A	Mus musculus ASF1 anti-silencing function 1 homolog A (S. cerevisiae) (Asf1a), mRNA.	C79052; 2310079C17Rik
0.442639	Asf1b	94.1342	17.333	41.6675	33.98	0.568516	ASF1B	Mus musculus ASF1 anti-silencing function 1 homolog B (S. cerevisiae) (Asf1b), mRNA.	AA409591; 1700003K02Rik
0.697104	Asgr1	281.761	7.82111	196.417	13.2238	0.378753	ASGR1	Mus musculus asialoglycoprotein receptor 1 (Asgr1), mRNA.	ASGPR1; Asgr-1; Asgr
1.4845	Asgr2	-13.6217	16.2539	-20.2215	6.01331	0.94103	ASGR2	Mus musculus asialoglycoprotein receptor 2 (Asgr2), mRNA.	ASGPR2; Asgr-2; Asgr
1.16892	Ash1l	275.758	42.3765	322.339	73.091	0.688411	ASH1L
0.996735	Ash2l	313.08	8.25428	312.058	19.3167	0.986236	ASH2L	Mus musculus ash2 (absent, small, or homeotic)-like (Drosophila) (Ash2l), transcript variant 1, mRNA.
0.955966	Asl	62.2525	17.6299	59.5113	15.3232	0.97841	ASL
1.03455	Asna1	1960.4	3.34493	2028.14	482.137	0.850618	ASNA1	Mus musculus arsA arsenite transporter, ATP-binding, homolog 1 (bacterial) (Asna1), mRNA.	1810048H22Rik; ArsA
1.63395	Asns	846.991	8.8338	1383.94	651.056	0.294456	ASNS	Mus musculus asparagine synthetase (Asns), mRNA.
0.846036	Asnsd1	99.5885	9.0934	84.2554	42.8736	0.872511	ASNSD1	Mus musculus asparagine synthetase domain containing 1 (Asnsd1), mRNA. XM_920067	2210409M21Rik
0.481417	Aspa	237.446	43.2763	114.311	75.4246	0.249976	ASPA	Mus musculus aspartoacylase (Aspa), mRNA.	Acy-2; Acy2
0.669092	Asph	177.985	66.2608	119.088	101.603	0.797864	ASPH	Mus musculus aspartate-beta-hydroxylase (Asph), transcript variant 2, mRNA.	BAH; AI848629; cI-37; 2310005F16Rik; 3110001L23Rik; AW561901; C79816; AW261690
1.37031	Asphd1	542.884	87.9442	743.922	332.724	0.436993	ASPHD1	Mus musculus aspartate beta-hydroxylase domain containing 1 (Asphd1), mRNA.	A830007L07Rik; Gm168; MGC130534
1.33111	Asphd2	459.865	9.39306	612.132	175.512	0.323295	ASPHD2	Mus musculus aspartate beta-hydroxylase domain containing 2 (Asphd2), mRNA.	MGC54823; 2900006N09Rik; 9230106G13Rik
0.167278	Aspm	-40.2255	12.9172	-6.72884	50.0769	0.724547	ASPM	Mus musculus asp (abnormal spindle)-like, microcephaly associated (Drosophila) (Aspm), mRNA.	Calmbp1; Sha1; MCPH5; D330028K02Rik; FLJ10518
0.726663	Aspn	-56.5119	0.390624	-41.0651	14.6981	0.861852	ASPN	Mus musculus asporin (Aspn), mRNA.	PLAP1; AA986886; 4631401G09Rik; SLRR1C
11.4969	Asprv1	2.33894	21.6552	26.8905	2.96831	0.786495	ASPRV1	Mus musculus aspartic peptidase, retroviral-like 1 (Asprv1), mRNA.	2300003P22Rik; SASPase; AA986851; SASP; Taps
1.25956	Aspscr1	92.5254	25.1988	116.542	28.6509	0.796489	ASPSCR1	Mus musculus alveolar soft part sarcoma chromosome region, candidate 1 (human) (Aspscr1), transcript variant 2, mRNA.	ASPS; ASPC; ASPCR1; TUG; 1190006K01Rik; ASPL; RCC17
0.378407	Asrgl1	461.716	28.6434	174.717	60.0593	0.00442925	ASRGL1	Mus musculus asparaginase like 1 (Asrgl1), mRNA.	ALP1; AW060375; AU040643; 2410004D18Rik; ALP
1.4741	Ass1	246.3	40.6545	363.072	66.3614	0.2754	ASS1	Mus musculus argininosuccinate synthetase 1 (Ass1), mRNA.	AA408052; Ass-1; ASS; MGC103151
1.61862	Aste1	48.212	2.12043	78.0368	65.735	0.765608	ASTE1	Mus musculus asteroid homolog 1 (Drosophila) (Aste1), mRNA.	AV006403; 1100001A21Rik; MGC107393
1.45166	Astn1	1010.08	122.222	1466.3	571.439	0.309854	ASTN1	Mus musculus astrotactin 1 (Astn1), mRNA.	Astn; mKIAA0289; GC14
1.2732	Astn2	650.075	34.7623	827.675	65.917	0.235472	ASTN2	Mus musculus astrotactin 2 (Astn2), transcript variant 1, mRNA.	bM452J22.1
1.13346	Asxl2	120.944	82.2973	137.085	18.8826	0.882552	ASXL2	Mus musculus additional sex combs like 2 (Drosophila) (Asxl2), mRNA.	4930556B16Rik; mKIAA1685
0.479098	Asz1	195.798	40.8868	93.8065	52.8889	0.30559	ASZ1	Mus musculus ankyrin repeat, SAM and basic leucine zipper domain containing 1 (Asz1), mRNA.	4933400N19Rik; ORF3; Gasz
0.631344	Atad1	669.768	55.4671	422.855	126.059	0.0594415	ATAD1	Mus musculus ATPase family, AAA domain containing 1 (Atad1), mRNA.	AW107648; 4921525H23Rik
1.93201	Atad2	40.8994	43.5723	79.0181	47.7651	0.702751	ATAD2	Mus musculus ATPase family, AAA domain containing 2 (Atad2), mRNA. XM_977863 XM_986850 XM_986886 XM_986920 XM_986957 XM_986994 XM_987027 XM_987064 XM_987087	MGC38189; 2610509G12Rik
1.42081	Atad3a	503.655	2.48037	715.6	41.5224	0.105171	ATAD3A	Mus musculus ATPase family, AAA domain containing 3A (Atad3a), mRNA.	KIAA1273; Tob3; 2400004H09Rik; mKIAA1273
0.480223	Atad4	-62.9156	17.7122	-30.2135	9.2983	0.71761	ATAD4	Mus musculus ATPase family, AAA domain containing 4 (Atad4), mRNA.	MGC37495; BC022765; E230006A12Rik
0.183452	Atcay	-21.1919	3.93156	-3.8877	14.3258	0.846531	ATCAY	Mus musculus ataxia, cerebellar, Cayman type homolog (human) (Atcay), mRNA.	CLAC; 3322401A10Rik; BNIP-H; BB077577; hes; ji
1.27511	Ate1	2983.95	157.347	3804.88	128.513	0.217363	ATE1	Mus musculus arginyltransferase 1 (Ate1), transcript variant 1, mRNA.	AI225793; AW547406
0.612616	Atf1	252.722	7.49833	154.822	1.50338	0.303567	ATF1
0.810827	Atf2	573.011	17.1132	464.613	52.308	0.408233	ATF2	Mus musculus activating transcription factor 2 (Atf2), transcript variant 1, mRNA.	MGC105211; Creb2; Atf-2; mXBP; D130078H02Rik; CRE-BP; MGC105222; D18875
10.0604	Atf3	17.2021	5.26586	173.061	115.217	0.194938	ATF3	Mus musculus activating transcription factor 3 (Atf3), mRNA.	LRG-21
1.03296	Atf4	1688.42	57.0396	1744.08	224.837	0.911563	ATF4	Mus musculus activating transcription factor 4 (Atf4), mRNA.	TAXREB67; MGC96460; CREB2; Atf-4; C/ATF
0.801743	Atf5	2010.41	93.8958	1611.83	196.357	0.0749281	ATF5	Mus musculus activating transcription factor 5 (Atf5), mRNA.	AFTA; Atf7; MGC102397; Atfx; ODA-10
1.32225	Atf7	96.4803	37.952	127.571	87.875	0.811495	ATF7	Mus musculus activating transcription factor 7 (Atf7), mRNA.	1110012F10Rik; AI549878; 9430065F09Rik; MGC31554; C130020M04Rik
1.68224	Atf7ip	101.783	26.2105	171.224	61.8266	0.485911	ATF7IP	Mus musculus activating transcription factor 7 interacting protein (Atf7ip), mRNA.	2610204M12Rik; AM; Mcaf1
0.535775	Atf7ip2	-61.5474	8.23768	-32.9756	17.9331	0.74831	ATF7IP2	PREDICTED: Mus musculus activating transcription factor 7 interacting protein 2, transcript variant 2 (Atf7ip2), mRNA.
0.526485	Atg10	99.5137	68.3458	52.3924	46.718	0.691588	ATG10	Mus musculus autophagy-related 10 (yeast) (Atg10), mRNA.	Atg10l; 5430428K15Rik; AI852123; Apg10p; APG10; 5330424L23Rik; Agp10; Apg10l
1.0699	Atg12	410.812	4.90351	439.527	66.1066	0.795115	ATG12	Mus musculus autophagy-related 12 (yeast) (Atg12), mRNA.	4931423H11Rik; Atg12l; A330058M13Rik; Apg12l
1.56578	Atg16l1	535.759	29.6822	838.88	84.8447	0.0315379	ATG16L1	Mus musculus autophagy-related 16-like 1 (yeast) (Atg16l1), transcript variant b, mRNA.	WDR30; AI225866; 1500009K01Rik; Atg16l; Apg16l; AI035639
1.23729	Atg2a	310.474	19.837	384.148	97.5384	0.298195	ATG2A	Mus musculus ATG2 autophagy related 2 homolog A (S. cerevisiae) (Atg2a), mRNA.	mKIAA0404; MGC67447; A830054M12; 1810013C15Rik; BC023754
1.67114	Atg2b	1408.09	8.60455	2353.11	405.319	0.0374466	ATG2B	Mus musculus ATG2 autophagy related 2 homolog B (S. cerevisiae) (Atg2b), mRNA.	C630028L02Rik; KIAA4067; 2410024A21Rik; AI503411; AI047755; AW558123; mKIAA4067; C030004M05Rik
0.788055	Atg3	370.481	47.6457	291.959	63.4447	0.469568	ATG3	Mus musculus autophagy-related 3 (yeast) (Atg3), mRNA.	PC3-96; APG3; Atg3l; Apg3l; 2610016C12Rik
0.426553	Atg4a	-16.8961	23.2938	-7.20711	42.1106	0.917893	ATG4A	Mus musculus autophagy-related 4A (yeast) (Atg4a), mRNA.	AI627006; Atg4al; Apg4a; AV169859; Autl2; MGC107179
0.96174	Atg4b	1247.28	194.674	1199.56	143.195	0.827613	ATG4B	Mus musculus autophagy-related 4B (yeast) (Atg4b), mRNA.	Apg4b; Autl1; Atg4bl; 2510009N07Rik
0.790229	Atg4c	1199.83	6.78747	948.137	159.319	0.184365	ATG4C	Mus musculus autophagy-related 4C (yeast) (Atg4c), mRNA.	Apg4c; Apg4-C; Atg4cl; Autl1
1.40682	Atg4d	119.061	15.1825	167.497	107.305	0.678666	ATG4D	Mus musculus autophagy-related 4D (yeast) (Atg4d), mRNA.	9830134P12Rik; Atg4dl; MGC31226; Autl4; Apg4d; APG4-D
1.0198	Atg5	609.48	59.9308	621.548	88.8405	0.911435	ATG5	Mus musculus autophagy-related 5 (yeast) (Atg5), mRNA.	Paddy; Atg5l; AW319544; 2010107M05Rik; Apg5l; C88337; 3110067M24Rik
1.03085	Atg7	110.566	64.5683	113.977	25.0176	0.973434	ATG7	Mus musculus autophagy-related 7 (yeast) (Atg7), mRNA.	Atg7l; Apg7l; 1810013K23Rik; Agp7
2.21873	Atg9b	418.61	116.114	928.783	457	0.138899	ATG9B	Mus musculus ATG9 autophagy related 9 homolog B (S. cerevisiae) (Atg9b), mRNA.	Apg9l2; Nos3as; Apg912; sONE; eONE; Apgdc2; Gm574
0.747847	Athl1	499.597	39.8255	373.622	132.403	0.337258	ATHL1	Mus musculus ATH1, acid trehalase-like 1 (yeast) (Athl1), mRNA.	5730511L01Rik; BC023151; MGC28193
1.03896	Atic	200.223	11.0081	208.024	89.9112	0.926816	ATIC	Mus musculus 5-aminoimidazole-4-carboxamide ribonucleotide formyltransferase/IMP cyclohydrolase (Atic), mRNA.	AA536954; AW212393; 2610509C24Rik
1.49886	Atl1	487.434	41.9741	730.594	105.61	0.0831318	ATL1	Mus musculus atlastin GTPase 1 (Atl1), mRNA.	SPG3; FSP1; AD-FSP; 4930435M24Rik
0.778338	Atl2	526.601	105.642	409.873	123.844	0.425363	ATL2	Mus musculus atlastin GTPase 2 (Atl2), transcript variant 1, mRNA.	AV334690; AA407293; 2010110I21Rik; Aip-2
0.694025	Atl3	226.642	1.44063	157.295	64.314	0.49943	ATL3	Mus musculus atlastin GTPase 3 (Atl3), mRNA.	4633402C03Rik; AI465397; MGC28761
17.3276	Atm	4.67791	4.40594	81.0569	76.4586	0.479803	ATM	Mus musculus ataxia telangiectasia mutated homolog (human) (Atm), mRNA.	C030026E19Rik; AI256621
1.74432	Atmin	165.847	34.948	289.291	174.7	0.575401	ATMIN	Mus musculus ATM interactor (Atmin), mRNA.	mKIAA0431; MGC79206
1.19485	Atn1	413.641	10.566	494.24	291.34	0.720454	ATN1	Mus musculus atrophin 1 (Atn1), mRNA.	Drpla; Atr1; atrophin-1
0.779949	Atoh1	-63.193	4.42615	-49.2873	16.4296	0.875695	ATOH1	Mus musculus atonal homolog 1 (Drosophila) (Atoh1), mRNA.	MATH-1; Math1; Hath1
0.341489	Atoh8	-47.804	14.3054	-16.3245	7.64549	0.723885	ATOH8	Mus musculus atonal homolog 8 (Drosophila) (Atoh8), mRNA.	okadin; Hath6; 4933425C05Rik; Math6
0.587725	Atox1	1640.34	324.706	964.069	448.151	0.0917186	ATOX1	Mus musculus ATX1 (antioxidant protein 1) homolog 1 (yeast) (Atox1), mRNA.	AI256639; Atx1
0.574894	Atp10a	123.381	25.8972	70.931	50.1286	0.585871	ATP10A	Mus musculus ATPase, class V, type 10A (Atp10a), mRNA.	Atp10c; pfatp
-0.240723	Atp10d	-34.5598	4.43706	8.31936	12.0235	0.63216	ATP10D	Mus musculus ATPase, Class V, type 10D (Atp10d), mRNA.	D5Buc24e; MGC37731; 9830145H18Rik; ATPVD
1.31562	Atp11c	427.052	108.2	561.839	343.207	0.617477	ATP11C	Mus musculus ATPase, class VI, type 11C (Atp11c), transcript variant 1, mRNA.	Ig; MGC117487; A330005H02Rik
-0.384716	Atp12a	-35.6416	4.59601	13.7119	20.0751	0.582078	ATP12A	Mus musculus ATPase, H+/K+ transporting, nongastric, alpha polypeptide (Atp12a), mRNA.	cHKA; HKalpha2; Atp1al1; MGC124416
2.0467	Atp13a1	435.387	10.4595	891.108	90.0146	0.00301552	ATP13A1	Mus musculus ATPase type 13A1 (Atp13a1), mRNA.	catp; Atp13a; Cgi152
1.55466	Atp13a2	460.657	89.1739	716.168	188.46	0.136251	ATP13A2	Mus musculus ATPase type 13A2 (Atp13a2), mRNA.	1110012E06Rik; AA589443
1.17555	Atp13a4	239.739	12.3724	281.824	286.849	0.849496	ATP13A4	Mus musculus ATPase type 13A4 (Atp13a4), mRNA.	4631413J11Rik; 9330174J19Rik; 4832416L12
0.41064	Atp13a5	108.058	3.92911	44.373	58.7107	0.516245	ATP13A5	Mus musculus ATPase type 13A5 (Atp13a5), mRNA.	C630015F21Rik
0.754516	Atp1a1	2447.9	94.4819	1846.98	79.4461	0.0166199	ATP1A1	Mus musculus ATPase, Na+/K+ transporting, alpha 1 polypeptide (Atp1a1), mRNA.	Atpa-1; MGC38419; BC010319
0.400061	Atp1a2	870.867	103.576	348.4	290.791	0.0263259	ATP1A2	Mus musculus ATPase, Na+/K+ transporting, alpha 2 polypeptide (Atp1a2), mRNA.	Atpa-3; mKIAA0778; AW060654
1.95935	Atp1a3	6.20529	29.4373	12.1584	28.5053	0.948563	ATP1A3	Mus musculus ATPase, Na+/K+ transporting, alpha 3 polypeptide (Atp1a3), mRNA.	MGC38914; MGC38713; Atpa-2; MGC27631; MGC39036
0.93522	Atp1b1	12185.6	1242.55	11396.2	354.823	0.609094	ATP1B1	Mus musculus ATPase, Na+/K+ transporting, beta 1 polypeptide (Atp1b1), mRNA.	Atpb; Atpb-1
0.64512	Atp1b2	5360.18	755.597	3457.96	933.859	0.0259055	ATP1B2	Mus musculus ATPase, Na+/K+ transporting, beta 2 polypeptide (Atp1b2), mRNA.	Atpb-2; Amog
0.789722	Atp1b3	7202.18	516.714	5687.72	894.295	0.0411016	ATP1B3	Mus musculus ATPase, Na+/K+ transporting, beta 3 polypeptide (Atp1b3), mRNA.	AW212096; AI664000; AA409958
0.713214	Atp1b4	-62.2906	27.935	-44.4265	37.5442	0.848723	ATP1B4	Mus musculus ATPase, (Na+)/K+ transporting, beta 4 polypeptide (Atp1b4), mRNA.	1110020B02Rik
0.260792	Atp2a1	-31.9619	9.70697	-8.3354	12.972	0.791312	ATP2A1	Mus musculus ATPase, Ca++ transporting, cardiac muscle, fast twitch 1 (Atp2a1), mRNA.	SERCA1
0.907594	Atp2a2	4456.05	822.049	4044.29	108.461	0.533963	ATP2A2	Mus musculus ATPase, Ca++ transporting, cardiac muscle, slow twitch 2 (Atp2a2), mRNA.	mKIAA4195; 9530097L16Rik; SERCA2; KIAA4195; D5Wsu150e
0.41912	Atp2a3	1763.12	364.29	738.958	585.667	0.115808	ATP2A3	Mus musculus ATPase, Ca++ transporting, ubiquitous (Atp2a3), mRNA.	Serca3; SERCA3b
1.30948	Atp2b1	1083.09	119.839	1418.28	285.676	0.155392	ATP2B1	Mus musculus ATPase, Ca++ transporting, plasma membrane 1 (Atp2b1), mRNA.	2810442I22Rik; E130111D10Rik; Pmca1
0.953969	Atp2b2	2114.49	160.401	2017.15	16.2411	0.879352	ATP2B2
1.34785	Atp2b3	699.047	151.656	942.211	29.4105	0.171485	ATP2B3	Mus musculus ATPase, Ca++ transporting, plasma membrane 3 (Atp2b3), mRNA.	Pmca3; 6430519O13Rik
1.45033	Atp2b4	654.632	180.421	949.429	390.135	0.360966	ATP2B4	Mus musculus ATPase, Ca++ transporting, plasma membrane 4 (Atp2b4), mRNA.	PMCA4; MGC129362; MGC129363
1.02035	Atp2c1	823.842	77.4567	840.605	39.0683	0.942555	ATP2C1	Mus musculus ATPase, Ca++-sequestering (Atp2c1), mRNA. XM_920852 XM_920861 XM_920863 XM_920866 XM_920870 XM_920876 XM_920881	SPCA; AW061228; D930003G21Rik; HHD; pmr1; ATP2C1A; 1700121J11Rik; MGC58010; BCPM
0.679334	Atp4a	-66.2124	13.6285	-44.9803	30.0312	0.814839	ATP4A	Mus musculus ATPase, H+/K+ exchanging, gastric, alpha polypeptide (Atp4a), mRNA.
0.0976021	Atp4b	-22.8884	20.8476	-2.23396	10.3113	0.818453	ATP4B	Mus musculus ATPase, H+/K+ exchanging, beta polypeptide (Atp4b), mRNA.	AV080843
1.03127	Atp5a1	3571.1	52.0451	3682.76	1421.65	0.912554	ATP5A1	Mus musculus ATP synthase, H+ transporting, mitochondrial F1 complex, alpha subunit, isoform 1 (Atp5a1), nuclear gene encoding mitochondrial protein, mRNA.	Atpm; AI035633; D18Ertd206e; AL023067; AL022851
0.969118	Atp5b	8337.54	402.3	8080.06	1875.54	0.849754	ATP5B	Mus musculus ATP synthase, H+ transporting mitochondrial F1 complex, beta subunit (Atp5b), nuclear gene encoding mitochondrial protein, mRNA.
0.862372	Atp5c1	4774.89	180.018	4117.73	663.95	0.193036	ATP5C1	Mus musculus ATP synthase, H+ transporting, mitochondrial F1 complex, gamma polypeptide 1 (Atp5c1), mRNA.	1700094F02Rik
0.942841	Atp5d	1286.53	51.1584	1212.99	733.79	0.889406	ATP5D	Mus musculus ATP synthase, H+ transporting, mitochondrial F1 complex, delta subunit (Atp5d), mRNA.	C85518; AU020773; 1500000I11Rik; 0610008F14Rik; AA960090; AI876556
0.517309	Atp5e	4259.53	131.431	2203.49	181.452	2.67315e-11	ATP5E	Mus musculus ATP synthase, H+ transporting, mitochondrial F1 complex, epsilon subunit (Atp5e), nuclear gene encoding mitochondrial protein, mRNA.	2410043G19Rik; ATPE; AV000645
0.634827	Atp5f1	351.736	42.652	223.291	111.609	0.29128	ATP5F1	Mus musculus ATP synthase, H+ transporting, mitochondrial F0 complex, subunit b, isoform 1 (Atp5f1), mRNA.	C76477
0.520807	Atp5g2	1935.11	153.475	1007.82	18.4278	7.5389e-07	ATP5G2	Mus musculus ATP synthase, H+ transporting, mitochondrial F0 complex, subunit c (subunit 9), isoform 2 (Atp5g2), mRNA.	MGC118044; 1810041M08Rik
0.934038	Atp5g3	4203.74	440.755	3926.45	759.645	0.658397	ATP5G3	Mus musculus ATP synthase, H+ transporting, mitochondrial F0 complex, subunit c (subunit 9), isoform 3 (Atp5g3), nuclear gene encoding mitochondrial protein, mRNA.	MGC124584; 6030447M23
0.814801	Atp5h	6118.14	21.1469	4985.07	192.891	0.061157	ATP5H	Mus musculus ATP synthase, H+ transporting, mitochondrial F0 complex, subunit d (Atp5h), nuclear gene encoding mitochondrial protein, mRNA.	0610009D10Rik
0.661431	Atp5j	2415.25	222.096	1597.52	156.161	0.00669147	ATP5J	Mus musculus ATP synthase, H+ transporting, mitochondrial F0 complex, subunit F (Atp5j), nuclear gene encoding mitochondrial protein, mRNA.
0.668318	Atp5j2	5817.69	1.27993	3888.06	238.363	8.59985e-05	ATP5J2	Mus musculus ATP synthase, H+ transporting, mitochondrial F0 complex, subunit f, isoform 2 (Atp5j2), nuclear gene encoding mitochondrial protein, mRNA.	1110019H14Rik
0.856559	Atp5k	6257.97	571.485	5360.32	436.492	0.219691	ATP5K
0.605877	Atp5l	1114.91	49.914	675.496	14.3793	0.000978005	ATP5L	Mus musculus ATP synthase, H+ transporting, mitochondrial F0 complex, subunit g (Atp5l), nuclear gene encoding mitochondrial protein, mRNA.	4933437C06Rik; MGC107547; MGC107313
0.612527	Atp5o	420.745	124.058	257.718	102.439	0.256219	ATP5O	Mus musculus ATP synthase, H+ transporting, mitochondrial F1 complex, O subunit (Atp5o), nuclear gene encoding mitochondrial protein, mRNA.	D12Wsu28e; OSCP; ATPO
1.00875	Atp5s	401.09	33.8646	404.601	121.326	0.977594	ATP5S	Mus musculus ATP synthase, H+ transporting, mitochondrial F0 complex, subunit s (Atp5s), nuclear gene encoding mitochondrial protein, mRNA.	facyor B; ATPW; 1110015E18Rik
0.955121	Atp5sl	570.217	19.7709	544.626	237.394	0.893788	ATP5SL	Mus musculus ATP5S-like (Atp5sl), mRNA.	C030044E10Rik
0.995542	Atp6ap1	13154.2	942.168	13095.6	248.424	0.970774	ATP6AP1	Mus musculus ATPase, H+ transporting, lysosomal accessory protein 1 (Atp6ap1), mRNA.	XAP-3; mFLJ00383; AC45; C7-1; AW108110; 16A; Atp6s1; Atp6ip1; FLJ00383; AI316502; CF2; VATPS1
1.01454	Atp6ap2	1624.57	1.57727	1648.19	285.292	0.946708	ATP6AP2	Mus musculus ATPase, H+ transporting, lysosomal accessory protein 2 (Atp6ap2), mRNA.	M8-9; APT6M8-9; 5730403E06Rik; Atp6ip2; ATP6M8-9
1.09811	Atp6v0a1	1677.41	207.663	1841.98	326.488	0.723444	ATP6V0A1
0.749317	Atp6v0a2	264.071	1.42303	197.873	70.5812	0.519575	ATP6V0A2	Mus musculus ATPase, H+ transporting, lysosomal V0 subunit A2 (Atp6v0a2), mRNA.	TJ6M; ATP6a2; AI385560; Atp6n2; C76904; Tj6; Stv1; 8430408C20Rik; AW489264; TJ6s; MGC124342; MGC124341; Atp6n1d
-9.80862	Atp6v0a4	-2.81934	15.5723	27.6538	7.55131	0.735173	ATP6V0A4	Mus musculus ATPase, H+ transporting, lysosomal V0 subunit A4 (Atp6v0a4), mRNA.	a4; Atp6n1b
1.25624	Atp6v0b	475.457	85.6802	597.289	157.1	0.428587	ATP6V0B	Mus musculus ATPase, H+ transporting, lysosomal V0 subunit B (Atp6v0b), mRNA.	VMA16; Atp6f; 2310024H13Rik
0.971702	Atp6v0d1	936.287	129.484	909.792	333.333	0.856596	ATP6V0D1	Mus musculus ATPase, H+ transporting, lysosomal V0 subunit D1 (Atp6v0d1), mRNA.	Vma6; AI267038; Ac39; P39; VATX; Atp6d
0.770613	Atp6v0d2	-46.2927	3.21564	-35.6738	30.6789	0.906922	ATP6V0D2	Mus musculus ATPase, H+ transporting, lysosomal V0 subunit D2 (Atp6v0d2), mRNA.	AI324824; V-ATPase; 1620401A02Rik
0.628106	Atp6v0e	551.519	25.4567	346.412	224.6	0.26421	ATP6V0E	Mus musculus ATPase, H+ transporting, lysosomal V0 subunit E (Atp6v0e), mRNA.	Atp6k; M9.2
1.04688	Atp6v0e2	2109.87	147.112	2208.78	935.232	0.883533	ATP6V0E2	Mus musculus ATPase, H+ transporting, lysosomal V0 subunit E2 (Atp6v0e2), mRNA.	NM9.2; 0610006O14Rik
1.11742	Atp6v1a	1816.72	201.555	2030.05	484.578	0.575847	ATP6V1A	Mus musculus ATPase, H+ transporting, lysosomal V1 subunit A (Atp6v1a), mRNA.	AI647066; Atp6a2; Atp6a1; VA68; Atp6v1a1; VPP2
0.656606	Atp6v1b1	443.719	41.7324	291.349	107.611	0.203177	ATP6V1B1	Mus musculus ATPase, H+ transporting, lysosomal V1 subunit B1 (Atp6v1b1), mRNA.	Vpp3; D630039P21Rik; Vpp-3; AW208839; D630030L16Rik; Atp6b1; D630003L15
1.07595	Atp6v1b2	4156.86	218.427	4472.58	678.14	0.555857	ATP6V1B2	Mus musculus ATPase, H+ transporting, lysosomal V1 subunit B2 (Atp6v1b2), mRNA.	HO57; Atp6b2; AI194269; R74844; AI790362
1.09283	Atp6v1c1	1043.38	88.5679	1140.24	463.184	0.778757	ATP6V1C1	Mus musculus ATPase, H+ transporting, lysosomal V1 subunit C1 (Atp6v1c1), mRNA.	1700025B18Rik; U13839
7.43682	Atp6v1c2	3.71811	3.8289	27.6509	12.4558	0.790566	ATP6V1C2	Mus musculus ATPase, H+ transporting, lysosomal V1 subunit C2 (Atp6v1c2), mRNA.	1110038G14Rik
1.04935	Atp6v1d	3204.27	187.498	3362.4	785.859	0.784394	ATP6V1D	Mus musculus ATPase, H+ transporting, lysosomal V1 subunit D (Atp6v1d), mRNA.	Atp6m; VATD; Vma8; 1110004P10Rik
1.19188	Atp6v1e1	3783.77	23.7552	4509.78	1522.38	0.504625	ATP6V1E1	Mus musculus ATPase, H+ transporting, lysosomal V1 subunit E1 (Atp6v1e1), mRNA.	2410029D23Rik; Atp6v1e; Atp6e2; D6Ertd385e; Atp6e; P31; E2; Vma4
-0.175707	Atp6v1e2	44.8915	17.4194	-7.88773	0.474518	0.555909	ATP6V1E2	Mus musculus ATPase, H+ transporting, lysosomal V1 subunit E2 (Atp6v1e2), mRNA.	Atp6e1; E1; 4930500C14Rik
0.70469	Atp6v1g1	400.674	84.956	282.351	114.997	0.376444	ATP6V1G1	Mus musculus ATPase, H+ transporting, lysosomal V1 subunit G1 (Atp6v1g1), mRNA.	1810024D14Rik; Vma10; AA960677; ATP6J; Atp6g1; VAG1
0.90079	Atp6v1g2	1761.53	73.3934	1586.77	497.004	0.567746	ATP6V1G2	Mus musculus ATPase, H+ transporting, lysosomal V1 subunit G2 (Atp6v1g2), mRNA.	NG38; 1500002D01Rik; Atp6g2; VAG2
0.210729	Atp6v1g3	-58.6111	9.29342	-12.351	14.3154	0.603734	ATP6V1G3	Mus musculus ATPase, H+ transporting, lysosomal V1 subunit G3 (Atp6v1g3), mRNA.	MGC130213; MGC130214
1.10282	Atp6v1h	1237.97	21.4362	1365.26	615.964	0.775921	ATP6V1H	Mus musculus ATPase, H+ transporting, lysosomal V1 subunit H (Atp6v1h), mRNA.	AU022349; SFDbeta; CGI-11; VMA13; SFDalpha; 0710001F19Rik; SFD; MGC11985
0.981118	Atp7a	72.8058	7.84701	71.431	32.8823	0.988039	ATP7A	Mus musculus ATPase, Cu++ transporting, alpha polypeptide (Atp7a), mRNA.	brindled; br; I14; Blo; Mo; DXHXS1608e; MNK; blotchy; mottled
0.957185	Atp7b	-33.4105	4.5269	-31.98	8.51567	0.984129	ATP7B	Mus musculus ATPase, Cu++ transporting, beta polypeptide (Atp7b), mRNA.	WND; tx; Atp7a
1.3134	Atp8a1	510.774	18.7219	670.852	79.6468	0.246992	ATP8A1	Mus musculus ATPase, aminophospholipid transporter (APLT), class I, type 8A, member 1 (Atp8a1), transcript variant 2, mRNA.	AW743152; B230107D19Rik; mKIAA4233; APLT; AI853962; KIAA4233; Class I; AW822227; AI481521; Atp3a2
1.16704	Atp8a2	450.88	95.0599	526.194	144.721	0.717177	ATP8A2	Mus musculus ATPase, aminophospholipid transporter-like, class I, type 8A, member 2 (Atp8a2), mRNA.	Atpc1b; AI415030; Ib
0.104321	Atp8b1	25.5702	39.3139	2.66752	24.3717	0.806533	ATP8B1	Mus musculus ATPase, class I, type 8B, member 1 (Atp8b1), mRNA.	Ic; FIC1; AI451886
0.580946	Atp8b3	-52.5641	15.3692	-30.5369	9.45123	0.801792	ATP8B3	Mus musculus ATPase, class I, type 8B, member 3 (Atp8b3), mRNA.	ATPIK; 1700042F02Rik; SAPLT; 1700056N23Rik
0.645501	Atp8b4	-77.7759	16.6705	-50.2044	30.2206	0.76177	ATP8B4	Mus musculus ATPase, class I, type 8B, member 4 (Atp8b4), mRNA. XM_901491 XM_901499 XM_925437 XM_925438 XM_925440 XM_985405	A530043E15; Im; MGC161341
1.71818	Atp9a	341.223	6.63923	586.281	392.609	0.401696	ATP9A	Mus musculus ATPase, class II, type 9A (Atp9a), mRNA.	mKIAA0611; IIa
1.9529	Atp9b	147.517	21.0956	288.087	89.9132	0.287202	ATP9B	Mus musculus ATPase, class II, type 9B (Atp9b), mRNA.	MMR; IIb; Atpc2b; AA934181
0.853785	Atpaf1	718.904	107.555	613.789	257.923	0.626756	ATPAF1	Mus musculus ATP synthase mitochondrial F1 complex assembly factor 1 (Atpaf1), nuclear gene encoding mitochondrial protein, mRNA.	AI593252; ATP11p; 6330547J17Rik; ATP11
1.1751	Atpaf2	5449.83	557.415	6404.1	4653.37	0.74129	ATPAF2	Mus musculus ATP synthase mitochondrial F1 complex assembly factor 2 (Atpaf2), nuclear gene encoding mitochondrial protein, mRNA.	ATP12p; ATP12
1.0464	Atpbd3	180.125	41.1165	188.483	21.77	0.941999	ATPBD3	Mus musculus ATP binding domain 3 (Atpbd3), mRNA.	MGC6894; BC005752
-1.13521	Atpbd4	-13.2064	5.03611	14.9919	21.1203	0.753479	ATPBD4	Mus musculus ATP binding domain 4 (Atpbd4), mRNA.	5730421E18Rik
1.00606	Atpif1	7541.8	389.608	7587.49	221.05	0.959318	ATPIF1	Mus musculus ATPase inhibitory factor 1 (Atpif1), nuclear gene encoding mitochondrial protein, mRNA.	If1; Atpi
1.94246	Atrn	29.6149	4.35709	57.5257	18.1796	0.758866	ATRN
1.8319	Atrx	374.949	27.2003	686.869	328.89	0.227234	ATRX	Mus musculus alpha thalassemia/mental retardation syndrome X-linked homolog (human) (Atrx), mRNA.	DXHXS6677E; ZNF-HX; XH2; ATR2; MRXS3; RAD54L; Hp1bp2; Hp1bp38; Rad54; Xnp
0.866636	Atxn1	1081.42	76.1104	937.202	67.1658	0.355553	ATXN1	Mus musculus ataxin 1 (Atxn1), mRNA.	C85907; Sca1; Atx1; Ataxin-1
1.19921	Atxn10	3245.05	95.8881	3891.49	1050.14	0.392814	ATXN10	Mus musculus ataxin 10 (Atxn10), mRNA.	AI325283; Tex169; TEG-169; Sca10; C77170; E46
1.42702	Atxn2	1924.96	101.665	2746.97	29.298	0.0144703	ATXN2	Mus musculus ataxin 2 (Atxn2), mRNA.	AW544490; ATX2; 9630045M23Rik; Sca2
1.0539	Atxn2l	244.608	18.9309	257.793	157.492	0.926542	ATXN2L	Mus musculus ataxin 2-like (Atxn2l), mRNA.	Atxnl2; A2lp; A2LG; A2RP; A2D
1.03077	Atxn3	206.33	7.35282	212.679	35.8864	0.953963	ATXN3	Mus musculus ataxin 3 (Atxn3), mRNA.	ATX3; 2210008M02Rik; AI647473; MJD1; ataxin-3; Mjd; Sca3
2.04349	Atxn7l1	17.3148	2.34233	35.3828	9.35259	0.841864	ATXN7L1	Mus musculus ataxin 7-like 1 (Atxn7l1), mRNA.
1.55452	Atxn7l2	90.4918	27.6504	140.671	16.205	0.595964	ATXN7L2	Mus musculus ataxin 7-like 2 (Atxn7l2), mRNA.	2610528J18Rik
1.6671	AU014645	263.785	58.6615	439.755	107.867	0.153683	AU014645	Mus musculus expressed sequence AU014645 (AU014645), mRNA. XM_899103 XM_899107 XM_907156 XM_920218 XM_920231 XM_920251 XM_920260 XM_920269 XM_920279	Ncbp1; AW538051
0.550155	AU015228	-63.5734	22.2699	-34.9752	5.35134	0.749741	AU015228	Mus musculus expressed sequence AU015228 (AU015228), mRNA.
0.142892	AU017455	-64.2226	1.36166	-9.17691	9.44787	0.534441	AU017455	Mus musculus expressed sequence AU017455 (AU017455), mRNA.
0.648452	AU018091	100.509	16.5027	65.1753	21.6576	0.699243	AU018091	Mus musculus expressed sequence AU018091 (AU018091), mRNA.	MGC91100; MGC91107
0.912483	AU018778	-54.0188	12.7877	-49.2912	16.5911	0.95761	AU018778	Mus musculus expressed sequence AU018778 (AU018778), mRNA.	TGH-2; MGC18894
0.492379	AU018829	193.02	14.8931	95.0391	41.6058	0.260981	AU018829	Mus musculus expressed sequence AU018829 (AU018829), mRNA.	MGC107506
0.795474	AU019823	193.585	22.6801	153.992	5.60533	0.676068	AU019823	Mus musculus expressed sequence AU019823 (AU019823), mRNA.	Gm639
-0.0277782	AU021034	51.9133	12.2607	-1.44206	3.98327	0.552239	AU021034	Mus musculus expressed sequence AU021034 (AU021034), mRNA.	9330158N17
0.558788	AU021092	318.601	23.8469	178.03	30.9018	0.145137	AU021092	Mus musculus expressed sequence AU021092 (AU021092), mRNA.
0.878166	AU021838	164.844	8.49694	144.761	3.19286	0.831272	AU021838	Mus musculus expressed sequence AU021838 (AU021838), mRNA.	AW536152; Prps1; MGC117905; 6720461H18
0.145143	AU022252	-58.9691	13.6934	-8.55893	13.4233	0.571928	AU022252	Mus musculus expressed sequence AU022252 (AU022252), mRNA.	RP23-344D2.9; MGC107672
-2.2274	AU022751	-10.0741	29.5052	22.439	30.1847	0.725379	AU022751	Mus musculus expressed sequence AU022751 (AU022751), mRNA.	AU023811; MGC117813
0.765035	AU022870	357.555	39.8877	273.542	77.3548	0.432643	AU022870	Mus musculus expressed sequence AU022870 (AU022870), mRNA.	MGC56855
0.54202	AU023871	-50.445	11.0936	-27.3422	0.377757	0.795022	AU023871	Mus musculus expressed sequence AU023871 (AU023871), mRNA.
1.48148	AU040320	187.916	19.3569	278.395	123.865	0.690894	AU040320	Mus musculus expressed sequence AU040320 (AU040320), transcript variant 2, mRNA.	A730047D20Rik
1.23683	AU040829	1540.76	8.1938	1905.67	413.984	0.24146	AU040829	Mus musculus expressed sequence AU040829 (AU040829), transcript variant 2, mRNA.	AW493732; Rich2; AI840762; 6330543G20
1.93626	AU042651	-14.9008	11.9775	-28.8518	12.6675	0.875494	AU042651	Mus musculus expressed sequence AU042651 (AU042651), mRNA.	E230025K15; MGC130189; MGC130190
0.996705	Auh	802.839	62.6295	800.194	101.543	0.985124	AUH	Mus musculus AU RNA binding protein/enoyl-coenzyme A hydratase (Auh), nuclear gene encoding mitochondrial protein, mRNA.	W91705; C77140
1.26852	Aup1	315.113	63.2169	399.725	40.0265	0.536918	AUP1	Mus musculus ancient ubiquitous protein 1 (Aup1), mRNA.	AA589454
0.110663	Aurka	23.0682	24.6158	2.5528	44.417	0.828465	AURKA	Mus musculus aurora kinase A (Aurka), mRNA.	Aurora-A; AU019385; Stk6; AW539821; Ark1; Ayk1; IAK; AIRK1
1.0101	Aurkaip1	1297.41	57.8298	1310.52	829.625	0.982444	AURKAIP1	Mus musculus aurora kinase A interacting protein 1 (Aurkaip1), mRNA.	0610033H09Rik; Akip; Aip
0.725473	Aurkc	-49.7394	12.4086	-36.0845	35.933	0.881713	AURKC	Mus musculus aurora kinase C (Aurkc), transcript variant 3, mRNA.	Stk13; AIE1; AIK3
0.884579	Auts2	276.525	31.0007	244.608	105.283	0.76455	AUTS2	Mus musculus autism susceptibility candidate 2 (Auts2), mRNA.	A730011F23Rik; D830032G16Rik; 2700063G02Rik
1.19478	AV028368	655.348	22.1385	782.999	173.366	0.407568	AV028368
0.763398	AV249152	66.7985	16.9639	50.9938	21.1334	0.832389	AV249152	Mus musculus expressed sequence AV249152 (AV249152), mRNA.	RP23-202E24.1
0.771582	Aven	58.2329	5.71863	44.9314	40.1956	0.889752	AVEN	Mus musculus apoptosis, caspase activation inhibitor (Aven), mRNA.	MGC124011; mAven-L; 1700056A21Rik; 1700013A01Rik; mAven-S
1.78073	Avil	-14.8607	20.3602	-26.4628	7.52027	0.896907	AVIL	Mus musculus advillin (Avil), mRNA.	DOC6; Advil
0.58896	Avp	-86.8836	2.72149	-51.171	29.869	0.693292	AVP	Mus musculus arginine vasopressin (Avp), mRNA.	Vp; Vsp
0.0811147	Avpi1	-12.4005	1.94362	-1.00586	26.5673	0.89791	AVPI1	Mus musculus arginine vasopressin-induced 1 (Avpi1), mRNA.	VIT32; esu; AA410041; 2310008N12Rik; mVIT32
3.55043	Avpr1a	36.8008	2.70041	130.659	114.787	0.496526	AVPR1A	Mus musculus arginine vasopressin receptor 1A (Avpr1a), mRNA.	AVPR; V1a; Avpr1; V1aR
0.598637	Avpr1b	-56.6167	4.28513	-33.8928	6.13907	0.798061	AVPR1B	Mus musculus arginine vasopressin receptor 1B (Avpr1b), mRNA.	VIBR; VPR3; V3/V1b; AVPR3
0.200707	Avpr2	-40.5499	9.21595	-8.13864	20.5595	0.716957	AVPR2	Mus musculus arginine vasopressin receptor 2 (Avpr2), mRNA.	DI1; V2R; MGC124213; DIR; MGC124214; MGC129321; ADHR; ND1; MGC124215
1.1743	AW049604	755.321	33.2598	886.973	293.786	0.564093	AW049604	Mus musculus expressed sequence AW049604 (AW049604), mRNA.	TAFA5
0.992022	AW061290	65.8341	16.5456	65.3089	4.52883	0.995193	AW061290	Mus musculus expressed sequence AW061290 (AW061290), mRNA.	MGC37733
0.623405	AW111922	63.7542	48.673	39.7447	30.6561	0.803699	AW111922
1.17263	AW121567	1641.4	52.7814	1924.76	327.404	0.267676	AW121567	Mus musculus expressed sequence AW121567 (AW121567), mRNA.	AW121567; 6430500D16
0.575555	AW125391	-31.9648	7.99625	-18.3975	1.24464	0.87901	AW125391
-0.588981	AW146020	-24.2644	30.9053	14.2913	48.3506	0.696897	AW146020	Mus musculus expressed sequence AW146020 (AW146020), mRNA.	GCF2; A130099G21
0.854873	AW146242	299.325	61.5236	255.885	115.407	0.733098	AW146242	Mus musculus expressed sequence AW146242 (AW146242), mRNA.
2.3321	AW146299	6.10624	18.7066	14.2403	24.0566	0.936104	AW146299	Mus musculus expressed sequence AW146299 (AW146299), mRNA.	Gm1055
0.719352	AW209491	-73.7359	10.8272	-53.0421	2.36406	0.81517	AW209491	Mus musculus expressed sequence AW209491 (AW209491), mRNA.
9.80976	AW540478	6.08914	6.10505	59.733	63.0442	0.587929	AW540478
0.413577	AW544981	-59.334	7.80477	-24.5392	26.0817	0.699218	AW544981	Mus musculus expressed sequence AW544981 (AW544981), mRNA.	MGC27770
0.882174	AW548124	130.411	34.6884	115.045	7.22525	0.869063	AW548124	Mus musculus expressed sequence AW548124 (AW548124), mRNA.	AI115348; X83346; MGC99930; ESTM17
0.963273	AW549877	1581.02	190.348	1522.95	326.127	0.836303	AW549877	Mus musculus expressed sequence AW549877 (AW549877), mRNA.	AI195826
2.91117	AW551984	112.356	72.431	327.087	210.328	0.27987	AW551984	Mus musculus expressed sequence AW551984 (AW551984), mRNA.	3222402N16
-0.523341	AW554918	-34.1321	21.6022	17.8627	43.2686	0.580368	AW554918	Mus musculus expressed sequence AW554918 (AW554918), mRNA.	AI461742; KIAA1328; mKIAA1328; 4921538P22
1.24822	AW555464	4817.67	120.744	6013.5	361.254	0.0877548	AW555464
1.27734	Axin2	211.578	46.7846	270.257	176.261	0.706624	AXIN2	Mus musculus axin2 (Axin2), mRNA.	Axil; Conductin; Axi1
0.292304	Axl	510.089	182.861	149.101	54.6487	0.0248594	AXL	Mus musculus AXL receptor tyrosine kinase (Axl), mRNA.	AI323647; Ufo; Ark; Tyro7
-0.207952	Axud1	-41.9399	10.4434	8.72149	36.4568	0.581442	AXUD1	Mus musculus AXIN1 up-regulated 1 (Axud1), mRNA.	4931429D10Rik; taip-3; URAX1
0.597344	AY026312	444.405	62.5808	265.463	46.3548	0.0957944	AY026312	Mus musculus cDNA sequence AY026312 (AY026312), mRNA.
0.448749	AY053573	-59.3124	16.5805	-26.6164	15.2704	0.713807	AY053573	Mus musculus cDNA sequence AY053573 (AY053573), mRNA.
0.499428	AY074887	-71.1374	2.3078	-35.528	8.63118	0.688226	AY074887	Mus musculus cDNA sequence AY074887 (AY074887), mRNA.	Mcpr1
0.658514	AY358078	18.5248	8.04441	12.1988	17.3459	0.943879	AY358078	Mus musculus cDNA sequence AY358078 (AY358078), mRNA.
-0.518263	AY761184	-18.8781	7.83905	9.78383	1.69562	0.749227	AY761184	Mus musculus cDNA sequence AY761184 (AY761184), mRNA.	CRS1C-3
0.400769	AY761185	145.17	8.50116	58.1798	30.9781	0.343066	AY761185	Mus musculus cDNA sequence AY761185 (AY761185), mRNA.
0.439276	Aym1	182.918	35.4555	80.3513	30.0408	0.275586	AYM1	Mus musculus activator of yeast meiotic promoters 1 (Aym1), mRNA.
0.914063	Aytl2	563.505	66.2521	515.079	26.2336	0.691822	AYTL2	Mus musculus acyltransferase like 2 (Aytl2), mRNA.	MGC8148; C87117; BB137372; 2900035H07Rik; LPCAT; BC005662
0.468738	Azgp1	-49.4243	0.622162	-23.1671	4.41253	0.76539	AZGP1	Mus musculus alpha-2-glycoprotein 1, zinc (Azgp1), mRNA.
3.04213	Azi1	83.8169	40.7961	254.982	4.50291	0.0919581	AZI1	Mus musculus 5-azacytidine induced gene 1 (Azi1), mRNA.	AZ1; Azi
1.18583	Azi2	405.014	26.0578	480.279	32.7828	0.502317	AZI2	Mus musculus 5-azacytidine induced gene 2 (Azi2), transcript variant 2, mRNA.	AZ2; AA410145
1.03693	Azin1	358.962	2.25245	372.219	20.1776	0.900644	AZIN1	Mus musculus antizyme inhibitor 1 (Azin1), mRNA.	1700085L02Rik; Oazi; Oazin; AI414949
0.569463	B020004J07Rik	-73.9951	3.0506	-42.1375	28.8775	0.724623	B020004J07RIK	Mus musculus RIKEN cDNA B020004J07 gene (B020004J07Rik), mRNA.
1.23644	B020006M18Rik	108.579	23.192	134.252	38.5351	0.784356	B020006M18RIK	Mus musculus RIKEN cDNA B020006M18 gene (B020006M18Rik), mRNA.
0.795897	B020018G12Rik	1549.01	77.1294	1232.86	60.0362	0.0858049	B020018G12RIK	Mus musculus RIKEN cDNA B020018G12 gene (B020018G12Rik), mRNA.	Y14
0.435434	B020031M17Rik	-61.9077	7.97131	-26.9567	22.1575	0.696216	B020031M17RIK	Mus musculus RIKEN cDNA B020031M17 gene (B020031M17Rik), mRNA.
0.517725	B230118H07Rik	723.832	276.146	374.746	47.8719	0.114441	B230118H07RIK	Mus musculus RIKEN cDNA B230118H07 gene (B230118H07Rik), mRNA.	RP23-325I3.1; NWC
0.6588	B230120H23Rik	111.946	20.1207	73.75	50.6626	0.701342	B230120H23RIK	Mus musculus RIKEN cDNA B230120H23 gene (B230120H23Rik), transcript variant 1, mRNA.	AV006891; MLTKalpha; MLTKbeta; MLTK; Zak
0.57413	B230206H07Rik	55.9883	10.0787	32.1446	17.7666	0.792068	B230206H07RIK	Mus musculus RIKEN cDNA B230206H07 gene (B230206H07Rik), mRNA.
0.976903	B230209C24Rik	2268.04	119.715	2215.65	429.754	0.872879	B230209C24RIK	Mus musculus RIKEN cDNA B230209C24 gene (B230209C24Rik), mRNA.
0.907807	B230217C12Rik	1286.09	210.4	1167.52	99.8045	0.59663	B230217C12RIK	Mus musculus RIKEN cDNA B230217C12 gene (B230217C12Rik), mRNA.	AI840637
2.19294	B230218L05Rik	25.6124	54.7584	56.1664	41.4936	0.760372	B230218L05RIK	Mus musculus RIKEN cDNA B230218L05 gene (B230218L05Rik), mRNA.	BB276295; Gm771
0.790142	B230219D22Rik	768.785	2.49321	607.45	27.5696	0.196127	B230219D22RIK	Mus musculus RIKEN cDNA B230219D22 gene (B230219D22Rik), mRNA.	AA119856; D530037I19Rik
1.71648	B230312A22Rik	198.403	48.3679	340.555	36.8745	0.185786	B230312A22RIK	Mus musculus RIKEN cDNA B230312A22 gene (B230312A22Rik), mRNA.	KIAA1539; RP23-124L1.9; mKIAA1539
0.879107	B230312I18Rik	767.07	75.5815	674.336	141.158	0.517141	B230312I18RIK	PREDICTED: Mus musculus RIKEN cDNA B230312I18 gene, transcript variant 3 (B230312I18Rik), mRNA.
2.33228	B230317C12Rik	76.9323	20.6592	179.428	110.552	0.395057	B230317C12RIK	Mus musculus RIKEN cDNA B230317C12 gene (B230317C12Rik), mRNA.	AB030186; AW209000; PIP49; RP23-125H15.2
0.670424	B230339H12Rik	88.2072	48.0055	59.1362	2.79599	0.762698	B230339H12RIK
1.42144	B230339M05Rik	923.195	61.1681	1312.26	122.231	0.0596959	B230339M05RIK	Mus musculus RIKEN cDNA B230339M05 gene (B230339M05Rik), mRNA. XM_910657 XM_921691 XM_921698 XM_921704 XM_921713 XM_982128 XM_982164 XM_982240 XM_982273 XM_982333	AI507211; mKIAA1219; 9330195P16; RP23-392P11.1
2.58355	B230340J04Rik	34.9677	3.35411	90.3409	66.4689	0.58063	B230340J04RIK	Mus musculus RIKEN cDNA B230340J04 gene (B230340J04Rik), mRNA.
1.63427	B230342M21Rik	494.165	85.9645	807.598	19.0299	0.0346955	B230342M21RIK	Mus musculus RIKEN cDNA B230342M21 gene (B230342M21Rik), mRNA.	AI428195
0.994224	B230358A15Rik	-56.6071	8.93533	-56.2801	7.66181	0.997054	B230358A15RIK	Mus musculus RIKEN cDNA B230358A15 gene (B230358A15Rik), mRNA.	RP23-348N10.1
1.92242	B230373P09Rik	147.06	176.53	282.712	107.297	0.425807	B230373P09RIK
1.16562	B230378H13Rik	767.668	14.1095	894.805	216.158	0.463583	B230378H13RIK
1.51134	B230380D07Rik	5517.27	360.315	8338.46	6037.43	0.509557	B230380D07RIK	Mus musculus RIKEN cDNA B230380D07 gene (B230380D07Rik), mRNA.	KIAA1164; mKIAA1164
1.49942	B230396O12Rik	17.5354	1.19156	26.2929	5.22647	0.922609	B230396O12RIK	Mus musculus RIKEN cDNA B230396O12 gene (B230396O12Rik), mRNA.	4932418L02
0.404837	B230399E16Rik	351.967	104.312	142.489	52.5546	0.0818986	B230399E16RIK	Mus musculus RIKEN cDNA B230399E16 gene (B230399E16Rik), mRNA.
0.314757	B2m	3697.18	100.772	1163.71	67.2127	1.2302e-24	B2M	Mus musculus beta-2 microglobulin (B2m), mRNA.	Ly-m11; beta2-m
1.15449	B3galnt1	398.263	2.22427	459.789	19.5945	0.609186	B3GALNT1	Mus musculus UDP-GalNAc:betaGlcNAc beta 1,3-galactosaminyltransferase, polypeptide 1 (B3galnt1), mRNA.	b3GT3; B3galt3
0.809389	B3galnt2	406.597	84.2711	329.095	293.543	0.739466	B3GALNT2	Mus musculus UDP-GalNAc:betaGlcNAc beta 1,3-galactosaminyltransferase, polypeptide 2 (B3galnt2), mRNA.	D230016N13Rik; MGC103263; A930105D20Rik; C80633
1.69965	B3galt1	30.1886	40.8375	51.31	12.4046	0.823004	B3GALT1	Mus musculus UDP-Gal:betaGlcNAc beta 1,3-galactosyltransferase, polypeptide 1 (B3galt1), mRNA.	beta3GalT-I; beta3GalT1; 6330417G03Rik
-1.98343	B3galt2	-15.893	34.8809	31.5226	47.7077	0.625212	B3GALT2	Mus musculus UDP-Gal:betaGlcNAc beta 1,3-galactosyltransferase, polypeptide 2 (B3galt2), mRNA.
0.790083	B3galt4	75.7284	6.36329	59.8318	3.21241	0.865529	B3GALT4	Mus musculus UDP-Gal:betaGalNAc beta 1,3-galactosyltransferase, polypeptide 4 (B3galt4), mRNA.	Gal-T2
0.725152	B3galt5	481.78	165.322	349.363	52.7121	0.394066	B3GALT5	Mus musculus UDP-Gal:betaGlcNAc beta 1,3-galactosyltransferase, polypeptide 5 (B3galt5), mRNA.	b3Galt-V; 1190002B21Rik; AU045265
1.52969	B3galt6	478.76	0.656029	732.356	382.155	0.374132	B3GALT6	Mus musculus UDP-Gal:betaGal beta 1,3-galactosyltransferase, polypeptide 6 (B3galt6), mRNA.	MGC91010; BB129894; GalTII
1.08744	B3gat1	508.128	29.7303	552.561	5.3253	0.726901	B3GAT1	Mus musculus beta-1,3-glucuronyltransferase 1 (glucuronosyltransferase P) (B3gat1), mRNA.	HNK-1; mKIAA4235; KIAA4235; 0710007K08Rik; GlcAT-P; AI846286
1.53469	B3gat2	219.963	17.8676	337.576	118.761	0.338081	B3GAT2	Mus musculus beta-1,3-glucuronyltransferase 2 (glucuronosyltransferase S) (B3gat2), mRNA.	GlcAT-S; KIAA1963; mKIAA1963; C130037I06
1.28706	B3gat3	408.711	3.92424	526.036	364.905	0.762331	B3GAT3	Mus musculus beta-1,3-glucuronyltransferase 3 (glucuronosyltransferase I) (B3gat3), mRNA.	2810405M13Rik
1.03067	B3gnt1	4912.34	149.051	5062.98	1414.14	0.882327	B3GNT1	Mus musculus UDP-GlcNAc:betaGal beta-1,3-N-acetylglucosaminyltransferase 1 (B3gnt1), mRNA.	iGNT; B3gnt6; BETA3GNT1; iGAT; 1500032M01Rik
0.176291	B3gnt2	-20.6971	14.8508	-3.64871	2.90566	0.848782	B3GNT2	Mus musculus UDP-GlcNAc:betaGal beta-1,3-N-acetylglucosaminyltransferase 2 (B3gnt2), mRNA.	B3gnt1; AA409404; B3Galt6; AW260308; AA408337; Beta3gnt; beta-3Gnt
-0.0323008	B3gnt3	208.61	20.0516	-6.73828	1.37657	0.0173865	B3GNT3	Mus musculus UDP-GlcNAc:betaGal beta-1,3-N-acetylglucosaminyltransferase 3 (B3gnt3), mRNA.	2210008L19Rik
-0.697697	B3gnt5	17.0864	1.83514	-11.9211	20.3386	0.746153	B3GNT5	Mus musculus UDP-GlcNAc:betaGal beta-1,3-N-acetylglucosaminyltransferase 5 (B3gnt5), mRNA.	beta3GnT5
0.892181	B3gnt6	54.1496	16.6026	48.3112	29.4175	0.948858	B3GNT6	Mus musculus UDP-GlcNAc:betaGal beta-1,3-N-acetylglucosaminyltransferase 6 (core 3 synthase) (B3gnt6), mRNA.	BC039789
0.154985	B3gnt7	-50.0768	9.6225	-7.76115	1.71855	0.635344	B3GNT7	Mus musculus UDP-GlcNAc:betaGal beta-1,3-N-acetylglucosaminyltransferase 7 (B3gnt7), mRNA.	beta-3GnT7; C330001H22Rik
0.624345	B3gnt8	95.8091	80.4052	59.8179	36.8323	0.614105	B3GNT8	Mus musculus UDP-GlcNAc:betaGal beta-1,3-N-acetylglucosaminyltransferase 8 (B3gnt8), transcript variant 2, mRNA.	B7galt7; MGC32391; BC025206; B3galt7
0.463767	B430203M17Rik	-24.2398	16.5415	-11.2416	6.91474	0.884378	B430203M17RIK	Mus musculus RIKEN cDNA B430203M17 gene (B430203M17Rik), mRNA.
-2.56902	B430211C08Rik	-12.8718	4.65588	33.0678	45.9674	0.625451	B430211C08RIK	Mus musculus RIKEN cDNA B430211C08 gene (B430211C08Rik), mRNA. XM_921960
0.474683	B430306N03Rik	-32.2459	14.5357	-15.3066	10.5139	0.849343	B430306N03RIK	Mus musculus RIKEN cDNA B430306N03 gene (B430306N03Rik), mRNA.	Treml6
1.16659	B430319F04Rik	1076.91	3.01251	1256.31	727.263	0.731917	B430319F04RIK	PREDICTED: Mus musculus RIKEN cDNA B430319F04 gene (B430319F04Rik), misc RNA.
0.425636	B4galnt2	-52.0009	3.25567	-22.1335	16.2322	0.737173	B4GALNT2	Mus musculus beta-1,4-N-acetyl-galactosaminyl transferase 2 (B4galnt2), mRNA.	Dlb1; Galg2; Galgt2; AI593864; Dlb-1; Ggm3
0.618874	B4galnt3	423.143	94.2006	261.872	74.8987	0.186702	B4GALNT3	Mus musculus beta-1,4-N-acetyl-galactosaminyl transferase 3 (B4galnt3), mRNA.	C330047A21; AB114826; B4GalNAcT3
3.74696	B4galnt4	148.978	37.4126	558.214	209	0.0185599	B4GALNT4	Mus musculus beta-1,4-N-acetyl-galactosaminyl transferase 4 (B4galnt4), mRNA.	Gm1095; BC038881; MGC48196; beta4GalNAcT4
0.208646	B4galt1	334.207	185.074	69.7309	37.3588	0.097679	B4GALT1	Mus musculus UDP-Gal:betaGlcNAc beta 1,4- galactosyltransferase, polypeptide 1 (B4galt1), mRNA.	4-GalT; GalT; Ggtb; B-1; Ggtb2; AA407245
0.653769	B4galt2	351.595	104.061	229.862	99.2871	0.36448	B4GALT2	Mus musculus UDP-Gal:betaGlcNAc beta 1,4- galactosyltransferase, polypeptide 2 (B4galt2), mRNA.	Ggtb2
1.39659	B4galt3	147.954	2.69066	206.632	36.4391	0.573975	B4GALT3	Mus musculus UDP-Gal:betaGlcNAc beta 1,4-galactosyltransferase, polypeptide 3 (B4galt3), mRNA.	AW125175; ESTM26; 9530061M23Rik; R74981; ESTM6; AA104562
1.00004	B4galt4	670.205	24.7582	670.23	82.1883	0.999844	B4GALT4	Mus musculus UDP-Gal:betaGlcNAc beta 1,4-galactosyltransferase, polypeptide 4 (B4galt4), mRNA.	B4galt-IV; beta4GalT-IV; 9130402O08Rik
0.840519	B4galt5	386.853	28.5456	325.157	39.1971	0.552199	B4GALT5	Mus musculus UDP-Gal:betaGlcNAc beta 1,4-galactosyltransferase, polypeptide 5 (B4galt5), mRNA.	9430078I07Rik; AW049941; AW539721
1.39337	B4galt7	69.373	12.4169	96.6619	25.5615	0.767211	B4GALT7	Mus musculus xylosylprotein beta1,4-galactosyltransferase, polypeptide 7 (galactosyltransferase I) (B4galt7), mRNA.	MGC28643
0.808234	B630005N14Rik	271.768	42.009	219.653	3.11858	0.603199	B630005N14RIK	Mus musculus RIKEN cDNA B630005N14 gene (B630005N14Rik), mRNA.	AI666701
1.47134	B630019K06Rik	913.029	55.9038	1343.37	463.795	0.208121	B630019K06RIK	Mus musculus RIKEN cDNA B630019K06 gene (B630019K06Rik), mRNA.	AI843180
1.6263	B830045N13Rik	90.2403	20.0885	146.758	29.8714	0.547393	B830045N13RIK	Mus musculus RIKEN cDNA B830045N13 gene (B830045N13Rik), mRNA.	MGC107461; MGC40674
0.179143	B930007M17Rik	51.2399	24.7696	9.17924	8.95466	0.642787	B930007M17RIK	Mus musculus RIKEN cDNA B930007M17 gene (B930007M17Rik), mRNA.	Gm1017
1.35894	B930011P16Rik	480.354	149.657	652.774	752.072	0.753585	B930011P16RIK	Mus musculus RIKEN cDNA B930011P16 gene (B930011P16Rik), mRNA.	Gm1377
2.59689	B930037P14Rik	191.304	42.2173	496.795	86.5327	0.00817084	B930037P14RIK	Mus musculus RIKEN cDNA B930037P14 gene (B930037P14Rik), mRNA.
1.08214	B930041F14Rik	1019.05	59.636	1102.75	329.199	0.74036	B930041F14RIK	Mus musculus RIKEN cDNA B930041F14 gene (B930041F14Rik), mRNA.	MNCb-3966
-4.87692	B930041G04	-16.961	16.0127	82.7172	50.3405	0.295298	B930041G04	Mus musculus hypothetical protein B930041G04 (B930041G04), mRNA.	RP23-137E3.1
1.38694	B930076A02	684.939	117.556	949.965	279.614	0.252659	B930076A02
1.21624	B9d1	220.818	36.6222	268.568	35.1957	0.637752	B9D1	Mus musculus B9 protein domain 1 (B9d1), mRNA.	AW045994; B9
1.60642	B9d2	736.125	168.67	1182.52	278.875	0.0702045	B9D2	Mus musculus B9 protein domain 2 (B9d2), mRNA.	MGC41256
0.966851	Baalc	147.86	9.88303	142.958	5.01466	0.946186	BAALC	Mus musculus brain and acute leukemia, cytoplasmic (Baalc), mRNA.	2810457D07Rik
0.442504	Baat	-51.0532	15.651	-22.5912	21.3379	0.750714	BAAT	Mus musculus bile acid-Coenzyme A: amino acid N-acyltransferase (Baat), mRNA.	AI158864; AI118337; BAT
1.17096	Bace1	389.659	7.70475	456.276	71.1206	0.550159	BACE1	Mus musculus beta-site APP cleaving enzyme 1 (Bace1), mRNA.	C76936
0.630504	Bace2	52.1678	0.151755	32.892	3.9837	0.818812	BACE2	Mus musculus beta-site APP-cleaving enzyme 2 (Bace2), mRNA.	ALP56; 1110059C24Rik; DRAP; ARP1; AI850424; CEAP1; BAE2; CDA13; ASP21; AEPLC
0.173058	Bach1	-19.8441	5.29371	-3.43418	20.8835	0.854553	BACH1	Mus musculus BTB and CNC homology 1 (Bach1), mRNA.	6230421P05Rik; AI323795
2.50447	Bach2	84.7741	24.9609	212.314	14.6579	0.18881	BACH2	Mus musculus BTB and CNC homology 2 (Bach2), mRNA.	MGC117590
1.01933	Bad	495.484	107.614	505.062	194.641	0.957567	BAD	Mus musculus BCL2-associated agonist of cell death (Bad), mRNA.	Bbc2; AI325008
0.837667	Bag1	3054.02	304.706	2558.25	216.454	0.187399	BAG1	Mus musculus Bcl2-associated athanogene 1 (Bag1), mRNA.	Rap46
1.1958	Bag2	12.9817	19.8176	15.5236	36.2937	0.978045	BAG2	Mus musculus BCL2-associated athanogene 2 (Bag2), mRNA.	BC016230; MGC36682; 2610042A13Rik
0.510876	Bag3	614.476	60.4693	313.921	8.4009	0.00587759	BAG3	Mus musculus BCL2-associated athanogene 3 (Bag3), mRNA.	Bis; AA407278
1.30972	Bag4	816.759	107.518	1069.73	721.028	0.628523	BAG4	Mus musculus BCL2-associated athanogene 4 (Bag4), mRNA.	SODD; 2410112I15Rik
1.18494	Bag5	914.611	127.719	1083.76	216.594	0.393451	BAG5	Mus musculus BCL2-associated athanogene 5 (Bag5), mRNA.	1600025G07Rik; 4930405J06Rik
-0.130194	Bahcc1	-34.5517	3.41208	4.4984	0.360865	0.662627	BAHCC1	Mus musculus BAH domain and coiled-coil containing 1 (Bahcc1), mRNA.	MGC79150; B930044J06; KIAA1447; BC060615
1.64939	Bahd1	286.572	33.4397	472.67	169.785	0.216244	BAHD1	Mus musculus bromo adjacent homology domain containing 1 (Bahd1), mRNA.	KIAA0945; AW541238; mKIAA0945; AL022997; Gm117; MGC117747
0.636593	Bai1	44.5721	39.6071	28.3743	4.68494	0.862691	BAI1
1.7604	Bai2	115.299	1.61934	202.972	37.1908	0.373506	BAI2	Mus musculus brain-specific angiogenesis inhibitor 2 (Bai2), mRNA.
1.12015	Bai3	892.05	74.7818	999.231	33.3607	0.505545	BAI3
1.11257	Baiap2	194.946	11.7491	216.89	38.2855	0.83789	BAIAP2	Mus musculus brain-specific angiogenesis inhibitor 1-associated protein 2 (Baiap2), transcript variant 1, mRNA.	R75030; IRSp53
3.64233	Baiap2l2	-0.939222	34.9157	-3.42096	30.8869	0.978849	BAIAP2L2	Mus musculus BAI1-associated protein 2-like 2 (Baiap2l2), mRNA.	BC048937; MGC56984
0.40511	Bak1	309.723	13.8137	125.472	91.149	0.0965062	BAK1	Mus musculus BCL2-antagonist/killer 1 (Bak1), mRNA.	N-Bak; Bak; N-BAK1
0.729005	Bambi	-54.6197	0.0125798	-39.818	2.87007	0.867536	BAMBI	Mus musculus BMP and activin membrane-bound inhibitor, homolog (Xenopus laevis) (Bambi), mRNA.	2610003H06Rik
0.658048	Banf1	365.623	78.9322	240.597	70.8917	0.290714	BANF1	Mus musculus barrier to autointegration factor 1 (Banf1), transcript variant 1, mRNA.	Bcrp1; Baf; L2bp1/Baf; C78287
1.08929	Banf2	-28.7625	12.2865	-31.3306	0.819808	0.976674	BANF2	Mus musculus barrier to autointegration factor 2 (Banf2), transcript variant 2, mRNA.	RP23-17O9.1; Baf-L; Baf-like; Gm115
1.22309	Banp	770.069	53.8004	941.861	454.356	0.608271	BANP	Mus musculus Btg3 associated nuclear protein (Banp), mRNA.	SMAR1; AA408158
1.00578	Bap1	824.138	34.3585	828.9	21.5267	0.973301	BAP1
0.826489	Bapx1	-32.5232	0.30915	-26.8801	40.7051	0.951521	BAPX1
2.88972	Bard1	18.4389	28.9649	53.2833	30.0981	0.706269	BARD1	Mus musculus BRCA1 associated RING domain 1 (Bard1), mRNA.
0.660493	Barhl1	222.274	6.17141	146.811	48.7361	0.431709	BARHL1	Mus musculus BarH-like 1 (Drosophila) (Barhl1), mRNA.	MBH2; Dres115
147.094	Barx1	0.317151	5.51576	46.6511	17.962	0.594008	BARX1	Mus musculus BarH-like homeobox 1 (Barx1), mRNA.
0.0386682	Barx2	-42.2745	28.6079	-1.63468	45.0889	0.670119	BARX2	Mus musculus BarH-like homeobox 2 (Barx2), mRNA.	2310006E12Rik; Barx2b
0.801051	Basp1	-43.5365	4.94913	-34.875	22.505	0.923012	BASP1	Mus musculus brain abundant, membrane attached signal protein 1 (Basp1), mRNA.	CAP-23; Ckap3; 2610024P12Rik; NAP22; NAP-22; CAP23
1.21896	Bat1a	954.297	104.315	1163.25	24.3949	0.236891	BAT1A	Mus musculus HLA-B-associated transcript 1A (Bat1a), mRNA.	MGC38799; AI428441; 0610030D10Rik; Bat1; Bat-1; D17H6S81E-1; D6S81Eh; D17H6S81E; MGC19235
1.30317	Bat2	135.541	37.6414	176.633	8.37777	0.673887	BAT2	Mus musculus HLA-B associated transcript 2 (Bat2), mRNA.	D17H6S51E; Bat-2; 3110039B05Rik; G2; mKIAA4178; KIAA4178; Wbp12
1.71348	Bat3	306.078	99.061	524.459	287.177	0.346524	BAT3	Mus musculus HLA-B-associated transcript 3 (Bat3), mRNA.	G3; AA408914; 2410045D21Rik; Scythe; BAG6; D17H6S52E
0.98686	Bat4	169.711	4.81752	167.481	30.0205	0.817874	BAT4	Mus musculus HLA-B associated transcript 4 (Bat4), mRNA.	Bat-4; G5; D17H6S54E
1.35065	Bat5	663.257	105.459	895.828	122.341	0.149104	BAT5	Mus musculus HLA-B associated transcript 5 (Bat5), mRNA.	D17H6S82E; MGC19234; AI326074; Bat-5; NG26
0.800931	Batf	-16.5103	20.4486	-13.2236	1.4609	0.970789	BATF	Mus musculus basic leucine zipper transcription factor, ATF-like (Batf), mRNA.	B-ATF; SFA-2
0.310721	Batf2	-67.6496	11.3444	-21.0202	4.15794	0.600165	BATF2	Mus musculus basic leucine zipper transcription factor, ATF-like 2 (Batf2), mRNA.	4933430F08Rik
0.812522	Bax	729.339	224.619	592.604	153.002	0.517369	BAX	Mus musculus Bcl2-associated X protein (Bax), mRNA.
0.628208	Baz1a	-54.7007	14.8357	-34.3634	9.93729	0.819032	BAZ1A	PREDICTED: Mus musculus bromodomain adjacent to zinc finger domain 1A (Baz1a), mRNA.
0.765933	Baz1b	289	46.9611	221.355	33.5207	0.504801	BAZ1B	Mus musculus bromodomain adjacent to zinc finger domain, 1B (Baz1b), mRNA.	Wbscr9; C87820; WSTF
1.58987	Baz2a	81.3052	34.2682	129.264	41.1472	0.615326	BAZ2A	Mus musculus bromodomain adjacent to zinc finger domain, 2A (Baz2a), mRNA.	Walp3; mKIAA0314; Tip5; C78388; C030005G16Rik; AA415431
1.10838	BB014433	-26.8181	2.29503	-29.7246	0.204794	0.973942	BB014433	Mus musculus expressed sequence BB014433 (BB014433), mRNA.
0.902822	BB128963	126.101	27.0313	113.847	73.4497	0.905868	BB128963
-0.00291495	BB146404	33.8998	75.5056	-0.0988161	15.3375	0.74283	BB146404	Mus musculus expressed sequence BB146404 (BB146404), mRNA.
1.18505	BB287469	48.3824	14.3411	57.3358	24.5923	0.921626	BB287469	Mus musculus expressed sequence BB287469 (BB287469), mRNA.
1.60272	Bbc3	335.223	72.509	537.268	125.028	0.379756	BBC3	Mus musculus BCL2 binding component 3 (Bbc3), mRNA.	PUMA; PUMA/JFY1
0.0197187	Bbox1	56.4261	13.6736	1.11265	31.294	0.506388	BBOX1	Mus musculus butyrobetaine (gamma), 2-oxoglutarate dioxygenase 1 (gamma-butyrobetaine hydroxylase) (Bbox1), mRNA.	AI874739
-0.424628	Bbs1	-15.0978	31.2217	6.41096	9.16284	0.814405	BBS1	Mus musculus Bardet-Biedl syndrome 1 (human) (Bbs1), mRNA. XM_902508 XM_907591 XM_920481 XM_920493 XM_920494 XM_920497 XM_920501	AI451249; D19Ertd609e
1.41254	Bbs12	193.725	22.5415	273.644	99.363	0.482113	BBS12	Mus musculus Bardet-Biedl syndrome 12 (human) (Bbs12), mRNA.	Gm407; MGC102209; Gm721; Gm1805
1.95022	Bbs2	285.623	18.6293	557.026	38.5237	0.0210298	BBS2	Mus musculus Bardet-Biedl syndrome 2 (human) (Bbs2), mRNA.	2410125H22Rik; AI447581
1.4808	Bbs4	1506.95	80.4412	2231.5	452.138	0.03146	BBS4	Mus musculus Bardet-Biedl syndrome 4 (human) (Bbs4), mRNA.	AW537059; AW742241; D9Ertd464e
1.79714	Bbs5	248.736	25.2532	447.014	54.5436	0.0715089	BBS5	Mus musculus Bardet-Biedl syndrome 5 (human) (Bbs5), mRNA.	RP23-436E15.1; 1700049I01Rik; 2700023J09Rik
1.86926	Bbs7	199.473	5.59972	372.867	173.812	0.253961	BBS7	Mus musculus Bardet-Biedl syndrome 7 (Bbs7), mRNA.	8430406N16Rik
1.31916	Bbs9	684.349	20.2315	902.767	29.4243	0.250417	BBS9	Mus musculus Bardet-Biedl syndrome 9 (Bbs9), mRNA.	E130103I17Rik
1.15727	Bbx	642.335	86.7516	743.353	62.0691	0.482468	BBX	Mus musculus bobby sox homolog (Drosophila) (Bbx), mRNA.	5730403O13Rik
-0.188489	BC002059	-42.9027	2.65906	8.08668	29.543	0.573762	BC002059	Mus musculus cDNA sequence BC002059 (BC002059), mRNA.	MGC6110
0.779698	BC002163	3733.78	523.66	2911.22	859.217	0.251208	BC002163	Mus musculus cDNA sequence BC002163 (BC002163), non-coding RNA.
0.960068	BC002199	785.149	22.8889	753.797	8.62937	0.817626	BC002199	Mus musculus cDNA sequence BC002199 (BC002199), mRNA.	MGC7434; C78909; AA407621
3.24624	BC002216	19.3033	21.0523	62.6631	4.21148	0.635254	BC002216	Mus musculus cDNA sequence BC002216 (BC002216), mRNA.	MGC7473
1.12609	BC002230	68.9935	17.3998	77.6928	45.0153	0.926441	BC002230	PREDICTED: Mus musculus cDNA sequence BC002230, transcript variant 1 (BC002230), mRNA.
0.820194	BC003236	815.443	22.8107	668.821	234.747	0.44368	BC003236
0.811399	BC003266	375.994	22.1108	305.082	97.314	0.533436	BC003266	Mus musculus cDNA sequence BC003266 (BC003266), mRNA.	MGC7764
-0.451317	BC003267	-4.1014	20.6266	1.85103	15.5841	0.947286	BC003267	Mus musculus cDNA sequence BC003267 (BC003267), mRNA.
-0.635289	BC003281	-25.3961	0.732221	16.1339	2.32907	0.643606	BC003281
0.988277	BC003331	117.076	83.1803	115.703	40.0524	0.989977	BC003331	Mus musculus cDNA sequence BC003331 (BC003331), transcript variant 1, mRNA.	MGC7150
0.867258	BC003885	1248.1	92.1087	1082.42	520.326	0.488495	BC003885
1.17275	BC003993	295.195	16.3572	346.19	85.0767	0.626672	BC003993	Mus musculus cDNA sequence BC003993 (BC003993), mRNA.	MGC107219; B230213M24; MGC7531; mKIAA1604; AL022752; AI173004; AA684037; MGC107450
1.59962	BC004004	43.6931	35.1479	69.8926	93.4673	0.81589	BC004004	Mus musculus cDNA sequence BC004004 (BC004004), mRNA.	2400006G15Rik; MGC7550
1.01401	BC004044	418.494	92.7882	424.359	182.684	0.976078	BC004044	Mus musculus cDNA sequence BC004044 (BC004044), mRNA.	C76981; MGC7673; KIAA4081; Fam20c; mKIAA4081
0.634973	BC004701	-58.3804	28.7444	-37.07	0.597099	0.81393	BC004701
0.556023	BC004728	-8.86332	5.84399	-4.92821	12.4258	0.955341	BC004728
0.868283	BC005537	408.575	4.61741	354.759	75.1125	0.61016	BC005537	Mus musculus cDNA sequence BC005537 (BC005537), mRNA.	C78201; 8030460C05Rik; RP23-92G13.4; MGC7474
1.42939	BC005624	142.205	42.7722	203.266	84.452	0.579709	BC005624	Mus musculus cDNA sequence BC005624 (BC005624), mRNA.	RP23-221O14.10; MGC11690
0.378416	BC005682	245.839	27.0633	93.0292	11.6819	0.100668	BC005682
0.678511	BC005764	679.299	123.46	460.912	15.9914	0.118231	BC005764	Mus musculus cDNA sequence BC005764 (BC005764), mRNA.	Prg2; mKIAA4076; KIAA4076
-0.741861	BC006779	-19.9126	0.0504375	14.7724	0.931786	0.699015	BC006779	Mus musculus cDNA sequence BC006779 (BC006779), mRNA. XM_001001098 XM_001003843 XM_001003848 XM_001003853 XM_001003857 XM_994341 XM_994355 XM_994381 XM_994398	mKIAA1769; MGC63178
1.38036	BC008163	113.19	7.60468	156.243	22.3838	0.639084	BC008163	Mus musculus cDNA sequence BC008163 (BC008163), mRNA.	MGC11672; RP23-464L12.5
0.641313	BC010462	-35.3524	8.13356	-22.672	17.6166	0.886839	BC010462
1.7472	BC011248	64.9902	1.6358	113.551	66.4927	0.699788	BC011248	Mus musculus cDNA sequence BC011248 (BC011248), mRNA.	MGC19067
0.542332	BC011426	-44.2553	13.8356	-24.0011	15.627	0.819971	BC011426	Mus musculus cDNA sequence BC011426 (BC011426), mRNA.	MGC18740
0.184086	BC013491	20.4009	15.9724	3.75552	16.1271	0.817489	BC013491	Mus musculus cDNA sequence BC013491 (BC013491), mRNA. XM_925312
0.687328	BC013529	655.083	84.844	450.257	66.8369	0.098487	BC013529	Mus musculus cDNA sequence BC013529 (BC013529), mRNA.	AA589616; MGC19209
0.171088	BC013712	16.6101	0.739554	2.84178	13.0304	0.877983	BC013712	Mus musculus cDNA sequence BC013712 (BC013712), mRNA.	RP23-442A20.5; ICB-1
1.06828	BC014805	44.606	1.93532	47.6518	1.97556	0.973226	BC014805	Mus musculus cDNA sequence BC014805 (BC014805), mRNA.	MGC25980
0.853364	BC015286	-67.8688	1.07078	-57.9168	13.4321	0.910592	BC015286	Mus musculus cDNA sequence BC015286 (BC015286), mRNA.
0.918955	BC016201	32.6057	0.303073	29.9631	0.58849	0.976652	BC016201	Mus musculus cDNA sequence BC016201 (BC016201), mRNA.	MGC27656
1.26353	BC016423	45.5015	22.7283	57.4923	16.8449	0.895715	BC016423	PREDICTED: Mus musculus cDNA sequence BC016423, transcript variant 2 (BC016423), mRNA.
1.85772	BC016495	21.0031	0.136042	39.0178	5.45045	0.842116	BC016495	Mus musculus cDNA sequence BC016495 (BC016495), mRNA.	D630020N23Rik; AA408380; MGC25909
1.04329	BC016548	97.9711	11.227	102.212	74.1392	0.979564	BC016548	Mus musculus cDNA sequence BC016548 (BC016548), mRNA.	MGC27847
0.805332	BC016579	-46.4286	24.2234	-37.3905	8.82941	0.919898	BC016579	Mus musculus cDNA sequence, BC016579 (BC016579), mRNA.	MGC27720
2.06371	BC017158	120.748	4.43419	249.189	78.4416	0.220506	BC017158	Mus musculus cDNA sequence BC017158 (BC017158), mRNA.	MGC28903
0.954967	BC017612	-55.5328	7.07886	-53.032	7.29237	0.977479	BC017612	Mus musculus cDNA sequence BC017612 (BC017612), mRNA.	Fn5
1.09336	BC017643	67.9277	9.25033	74.2695	30.12	0.944766	BC017643	Mus musculus cDNA sequence BC017643 (BC017643), mRNA.	MGC37382; MGC37062; MGC28978
1.27176	BC017647	577.803	113.132	734.827	41.0842	0.302007	BC017647	Mus musculus cDNA sequence BC017647 (BC017647), mRNA.	MGC28990
1.42421	BC018101	79.185	13.6352	112.776	6.89204	0.717167	BC018101	Mus musculus cDNA sequence BC018101 (BC018101), mRNA.
1.12815	BC018242	290.651	54.4784	327.899	63.5297	0.779744	BC018242	Mus musculus cDNA sequence BC018242 (BC018242), mRNA.	PRG-4; MGC25492
1.00528	BC018465	-43.2299	34.489	-43.4582	35.4162	0.998069	BC018465	Mus musculus cDNA sequence BC018465 (BC018465), mRNA.	MGC27784
-1.42368	BC019943	-8.9743	28.5955	12.7765	20.2306	0.81173	BC019943
1.57866	BC020002	106.585	10.8795	168.262	3.52528	0.515361	BC020002	Mus musculus cDNA sequence BC020002 (BC020002), mRNA.	C81488; MGC25527
0.886557	BC020108	57.6856	18.0856	51.1416	12.3559	0.942604	BC020108
-1.66701	BC020535	-20.6114	4.66079	34.3593	67.6594	0.584095	BC020535	Mus musculus cDNA sequence BC020535 (BC020535), mRNA.	MGC19360
1.78961	BC021381	378.967	63.1825	678.204	342.546	0.252352	BC021381	Mus musculus cDNA sequence BC021381 (BC021381), mRNA.	MGC29235; MGC38018; MGC39032
0.653942	BC021614	-56.0397	5.45428	-36.6467	4.83504	0.827088	BC021614	Mus musculus cDNA sequence BC021614 (BC021614), mRNA.	MGC37914
0.595758	BC021785	-77.9388	2.84549	-46.4327	6.77681	0.722096	BC021785	Mus musculus cDNA sequence BC021785 (BC021785), mRNA.
0.904846	BC021790	461.282	8.62813	417.39	168.369	0.770013	BC021790
0.123492	BC021891	-63.1847	11.8305	-7.8028	24.2322	0.537336	BC021891	Mus musculus cDNA sequence BC021891 (BC021891), mRNA.	mKIAA1804; KIAA1804; MGC27778
4.25325	BC022224	10.7698	32.7859	45.8065	28.7892	0.706023	BC022224	Mus musculus cDNA sequence BC022224 (BC022224), mRNA.	MGC18716
0.99915	BC022623	184.614	12.827	184.458	17.8031	0.998694	BC022623	Mus musculus cDNA sequence BC022623 (BC022623), mRNA.
-1.7162	BC022651	-23.6697	23.6146	40.6219	110.674	0.587933	BC022651	Mus musculus cDNA sequence BC022651 (BC022651), mRNA.	MGC31268; A630041N19
-0.458129	BC022687	-33.8128	11.7308	15.4906	60.7168	0.615362	BC022687	Mus musculus cDNA sequence BC022687 (BC022687), mRNA.	C130001I08Rik; Flj20080; AW050009
0.314776	BC023105	-43.7804	16.6998	-13.781	15.0958	0.737078	BC023105	Mus musculus cDNA sequence BC023105 (BC023105), mRNA.	MGC28198
0.367124	BC023151	-32.4237	6.9348	-11.9035	14.4032	0.818112	BC023151
0.614375	BC023179	-21.9158	53.2653	-13.4645	4.407	0.930033	BC023179	Mus musculus cDNA sequence BC023179 (BC023179), mRNA.	MGC37070; MGC118009
0.59989	BC023744	-29.8437	10.8216	-17.9029	9.79205	0.893441	BC023744	Mus musculus cDNA sequence BC023744 (BC023744), mRNA. XM_923702
1.77683	BC023814	168.574	62.0746	299.527	197.603	0.442892	BC023814	Mus musculus cDNA sequence BC023814 (BC023814), mRNA.	MGC38548
0.698601	BC023829	317.297	48.88	221.664	18.2132	0.34794	BC023829
1.00046	BC023882	737.761	51.6238	738.102	388.61	0.999064	BC023882	Mus musculus cDNA sequence BC023882 (BC023882), mRNA.	D5H4S43; MGC38108; MGC36997; D4S43h; D5H4S43E; MGC38583
-2.61087	BC024139	-2.33919	15.211	6.10731	21.0959	0.924946	BC024139	Mus musculus cDNA sequence BC024139 (BC024139), mRNA.	6230424I18Rik; MGC37978
-10.1538	BC024479	-2.61192	20.9136	26.521	32.9524	0.775707	BC024479	Mus musculus cDNA sequence BC024479 (BC024479), mRNA.	MGC37388
0.77193	BC024561	-25.4463	15.9424	-19.6428	8.89038	0.948122	BC024561	Mus musculus cDNA sequence BC024561 (BC024561), mRNA.	VCC-1; Vcc1; MGC37641
5.13065	BC024814	7.07331	5.0591	36.2907	20.8331	0.746328	BC024814
-1.13133	BC024868	-16.3497	6.73806	18.4969	34.0053	0.703391	BC024868	Mus musculus cDNA sequence BC024868 (BC024868), mRNA.	Gm158
0.662026	BC024997	-65.1954	12.3718	-43.1611	3.99966	0.803743	BC024997	Mus musculus cDNA sequence BC024997 (BC024997), mRNA.	MGC32231
0.539	BC025076	125.003	34.7803	67.3764	106.929	0.626208	BC025076
3.49779	BC025446	-1.1046	1.94072	-3.86366	3.45044	0.969272	BC025446	Mus musculus cDNA sequence BC025446 (BC025446), mRNA.	MGC29251
1.30072	BC025546	614.665	20.2137	799.509	52.2952	0.181288	BC025546	Mus musculus cDNA sequence BC025546 (BC025546), mRNA.	MGC38131; AU022703; C730036L12Rik
3.00786	BC025920	10.7218	6.91612	32.2498	3.38651	0.811456	BC025920	Mus musculus cDNA sequence BC025920 (BC025920), mRNA.
0.593768	BC026374	-78.8197	8.57795	-46.8006	10.0985	0.717742	BC026374	Mus musculus cDNA sequence BC026374 (BC026374), mRNA.	MGC31116
0.694642	BC026439	-50.5933	20.1975	-35.1442	11.6293	0.862813	BC026439	Mus musculus cDNA sequence BC026439 (BC026439), mRNA.	MGC31374
0.643459	BC026585	78.984	53.8861	50.823	6.05157	0.77301	BC026585
1.91759	BC026590	77.0587	6.56875	147.767	59.097	0.474113	BC026590	Mus musculus cDNA sequence BC026590 (BC026590), mRNA.	RP23-455B1.1
-0.468739	BC026782	11.4826	14.305	-5.38234	24.7331	0.848945	BC026782	Mus musculus cDNA sequence BC026782 (BC026782), mRNA.	Cfhrb_4/2
0.590219	BC027072	-51.9552	22.8759	-30.665	12.2318	0.812568	BC027072	Mus musculus cDNA sequence BC027072 (BC027072), mRNA.	MGC38716
1.2956	BC027231	119.633	11.4715	154.996	49.5151	0.765131	BC027231	Mus musculus cDNA sequence BC027231 (BC027231), mRNA.	MGC27931
14.0141	BC027344	3.91702	30.0016	54.8934	36.3529	0.586564	BC027344	Mus musculus cDNA sequence BC027344 (BC027344), mRNA.
0.249332	BC028528	450.884	58.38	112.42	109.648	0.0207243	BC028528	Mus musculus cDNA sequence BC028528 (BC028528), mRNA.	L259; MGC41379
1.09831	BC029214	394.138	21.0219	432.885	45.6153	0.724769	BC029214	Mus musculus cDNA sequence BC029214 (BC029214), mRNA.	MGC36831; RP23-47P18.9; D930050G13Rik
0.735777	BC030183	15.6604	13.118	11.5226	25.9619	0.963461	BC030183	Mus musculus cDNA sequence BC030183 (BC030183), mRNA.	MGC29254
1.30441	BC030307	-29.4875	5.68957	-38.4638	12.5236	0.919533	BC030307	Mus musculus cDNA sequence BC030307 (BC030307), transcript variant 1, mRNA.	Gnn; Nt5dc3; MGC40847
0.475854	BC030396	426.188	117.445	202.803	90.7395	0.102255	BC030396	Mus musculus cDNA sequence BC030396 (BC030396), mRNA.	MGC40696
0.738535	BC030440	-59.7148	5.47567	-44.1015	16.0393	0.860541	BC030440	Mus musculus cDNA sequence BC030440 (BC030440), mRNA.	MGC40914
1.12155	BC030476	19724.1	1916.04	22121.5	12019.1	0.82494	BC030476	Mus musculus cDNA sequence BC030476 (BC030476), mRNA.	MGC117582; MGC40815
0.991893	BC030499	1418.27	72.9214	1406.77	822.242	0.984471	BC030499	Mus musculus cDNA sequence BC030499 (BC030499), mRNA.	BC037104
3.4067	BC030500	42.5092	34.1224	144.816	101.145	0.376327	BC030500	Mus musculus cDNA sequence BC030500 (BC030500), mRNA.	MGC40983
1.14774	BC030867	321.829	20.3635	369.376	173.748	0.755155	BC030867	Mus musculus cDNA sequence BC030867 (BC030867), mRNA.	MGC117894; RP23-461C4.3; MGC31269
0.766426	BC031181	3152.27	78.3268	2415.98	116.725	0.019008	BC031181	Mus musculus cDNA sequence BC031181 (BC031181), mRNA.
1.45539	BC031353	609.71	54.1929	887.367	531.316	0.473861	BC031353	Mus musculus cDNA sequence BC031353 (BC031353), mRNA.	C130047D21Rik; AI553555; 6330415I01Rik; mKIAA1370; MGC41344; MGC38960
0.365889	BC031441	-54.8422	19.9911	-20.0662	6.66317	0.697912	BC031441	Mus musculus cDNA sequence BC031441 (BC031441), mRNA.	MGC18735
0.95189	BC031575	502.714	111.34	478.528	125.98	0.869913	BC031575
0.914925	BC031748	924.503	83.061	845.851	11.0153	0.601377	BC031748	Mus musculus cDNA sequence BC031748 (BC031748), mRNA.	MGC19245; RP23-272P2.1
1.3707	BC031781	896.372	124.888	1228.66	282.299	0.157728	BC031781	Mus musculus cDNA sequence BC031781 (BC031781), mRNA.	MGC30618
2.04568	BC031853	22.7513	32.0145	46.5418	63.1344	0.813605	BC031853	Mus musculus cDNA sequence BC031853 (BC031853), mRNA.	D430050E18; MGC25764
0.575691	BC032265	105.222	12.6784	60.5755	18.3665	0.625072	BC032265	Mus musculus cDNA sequence BC032265 (BC032265), mRNA.	FN3K-RP; MGC40640
101.124	BC034076	-0.21173	39.6127	-21.4109	2.46866	0.819272	BC034076	Mus musculus cDNA sequence BC034076 (BC034076), mRNA.	MGC31312; MGC49669; D030068H01
1.51196	BC037034	2134.3	229.421	3226.97	55.7446	0.00806858	BC037034	Mus musculus cDNA sequence BC037034 (BC037034), mRNA.	MGC47434
0.513928	BC037594	-58.7372	4.17695	-30.1867	13.7813	0.747979	BC037594
0.42479	BC037703	-63.2458	10.8519	-26.8662	39.4	0.693885	BC037703	Mus musculus cDNA sequence BC037703 (BC037703), mRNA.	MGC47256
0.891756	BC038156	366.197	18.2509	326.558	2.37174	0.702305	BC038156	Mus musculus cDNA sequence BC038156 (BC038156), mRNA.	E230011F09
0.636551	BC038613	429.713	23.3603	273.534	137.516	0.241353	BC038613	Mus musculus cDNA sequence BC038613 (BC038613), mRNA.	MGC47347
1.59925	BC038822	54.6425	31.6452	87.3869	17.8824	0.726428	BC038822	Mus musculus cDNA sequence BC038822 (BC038822), mRNA.	MGC47262
1.0885	BC038925	80.5652	1.57031	87.6955	9.61618	0.938206	BC038925	Mus musculus cDNA sequence BC038925 (BC038925), mRNA.	MGC49416
0.801841	BC039093	1016.01	264.421	814.676	123.612	0.383852	BC039093
-0.489889	BC040758	-37.8653	8.83839	18.5498	4.62219	0.528917	BC040758	Mus musculus cDNA sequence BC040758 (BC040758), mRNA.	PC-LKC; Gm624
2.47345	BC043301	10.9927	32.4962	27.1899	19.5251	0.86595	BC043301	Mus musculus cDNA sequence BC043301 (BC043301), mRNA.	MGC102645
0.510484	BC043934	-62.5391	15.5555	-31.9252	11.4227	0.73082	BC043934	Mus musculus cDNA sequence BC043934 (BC043934), mRNA.	MGC31404; MGC49691; D030022H06
1.74937	BC046331	160.167	49.8336	280.193	134.25	0.370047	BC046331	Mus musculus cDNA sequence BC046331 (BC046331), mRNA.	mKIAA0562; A930027E11; MGC54921; RP23-254N4.3; AI115523
0.839054	BC046404	285.304	38.8528	239.386	21.5497	0.696634	BC046404	Mus musculus cDNA sequence BC046404 (BC046404), mRNA.	MGC59632
0.677351	BC048355	-26.7655	9.16635	-18.1296	9.5979	0.922832	BC048355
0.797857	BC048403	67.6261	11.6297	53.9559	32.2679	0.879859	BC048403	Mus musculus cDNA sequence BC048403 (BC048403), mRNA.	E030027L10
0.616503	BC048502	-28.7134	32.2352	-17.7019	12.4057	0.904105	BC048502	Mus musculus cDNA sequence BC048502 (BC048502), mRNA.	MGC58362
0.284802	BC048546	97.4164	94.0288	27.7444	8.30455	0.531245	BC048546	Mus musculus cDNA sequence BC048546 (BC048546), mRNA.	MGC58520
0.50903	BC048562	-32.3581	2.44045	-16.4712	9.81244	0.858572	BC048562	Mus musculus cDNA sequence BC048562 (BC048562), mRNA.	MGC58561
-0.0783312	BC048599	19.6499	7.96044	-1.5392	0.849241	0.813086	BC048599	Mus musculus cDNA sequence BC048599 (BC048599), mRNA.	1700020H15
0.668158	BC048644	36.9793	11.9513	24.708	7.38838	0.891783	BC048644	Mus musculus cDNA sequence BC048644 (BC048644), mRNA.
0.697246	BC048651	-78.596	11.7446	-54.8008	28.9233	0.792433	BC048651	Mus musculus cDNA sequence BC048651 (BC048651), mRNA.	NYD-SP18; MGC58790; Gm764
0.620757	BC048671	-83.9007	6.05763	-52.0819	15.9388	0.720048	BC048671	Mus musculus cDNA sequence BC048671 (BC048671), mRNA.	MGC58841
0.681303	BC048679	168.887	10.471	115.063	18.1727	0.56393	BC048679	Mus musculus cDNA sequence BC048679 (BC048679), mRNA.
0.195151	BC049635	8.21875	41.2945	1.6039	8.48036	0.951061	BC049635	Mus musculus cDNA sequence BC049635 (BC049635), mRNA.	RP23-124L1.1; 4931430D02; MGC58387
0.718255	BC049702	-58.1386	20.3763	-41.7583	2.88458	0.854531	BC049702	Mus musculus cDNA sequence BC049702 (BC049702), mRNA.	Gm720; MGC58623
0.475048	BC049730	-53.1104	19.1442	-25.23	16.462	0.755219	BC049730	Mus musculus cDNA sequence BC049730 (BC049730), mRNA.	MGC58740
0.457427	BC049762	-61.3831	12.9489	-28.0783	9.56431	0.707865	BC049762	Mus musculus cDNA sequence BC049762 (BC049762), mRNA.	4930503F14
1.07691	BC049806	1444.68	229.824	1555.79	186.296	0.744005	BC049806	Mus musculus cDNA sequence BC049806 (BC049806), mRNA.	D630010C10
1.15715	BC050092	70.3053	0.335483	81.354	29.8995	0.904143	BC050092	Mus musculus cDNA sequence BC050092 (BC050092), mRNA.	MGC60727; 6720416P20
0.639764	BC050210	10.7179	23.7553	6.85692	4.36743	0.965973	BC050210	Mus musculus cDNA sequence BC050210 (BC050210), mRNA.	MGC60970; Gm990
0.923206	BC050777	65.0969	47.6691	60.0979	24.0768	0.958565	BC050777	Mus musculus cDNA sequence BC050777 (BC050777), mRNA.	RP23-33L3.1; 1700095H12
1.28387	BC050811	654.846	93.5165	840.737	669.365	0.748677	BC050811	Mus musculus cDNA sequence BC050811 (BC050811), mRNA.	MGC58791
1.11411	BC051019	212.178	15.2726	236.389	5.61337	0.805339	BC051019	Mus musculus cDNA sequence BC051019 (BC051019), mRNA.	AA571491; D7H11orf16; ICRFP703B1614Q5.5
0.741792	BC051070	-61.8628	7.00824	-45.8894	23.8156	0.858711	BC051070	Mus musculus cDNA sequence BC051070 (BC051070), mRNA.	MGC58999
-5.09251	BC051142	-14.9101	45.4281	75.9298	70.7597	0.390932	BC051142	Mus musculus cDNA sequence BC051142 (BC051142), mRNA.
-0.209468	BC051227	63.0889	21.8216	-13.2151	5.39898	0.396095	BC051227	Mus musculus cDNA sequence BC051227 (BC051227), mRNA.	MGC63135; Fksg24
0.618527	BC051628	97.0328	4.69457	60.0174	24.3881	0.685186	BC051628	Mus musculus cDNA sequence BC051628 (BC051628), mRNA.	1700026M20Rik; MGC58365
-9.62562	BC051665	-2.67332	6.08481	25.7323	40.6136	0.759813	BC051665	Mus musculus cDNA sequence BC051665 (BC051665), mRNA.	MGC60730
-76.1437	BC052055	-0.773365	10.172	58.8869	31.6459	0.512814	BC052055	Mus musculus cDNA sequence BC052055 (BC052055), mRNA.	MGC62438
0.213214	BC053393	-36.4686	7.29856	-7.7756	6.60873	0.747925	BC053393	Mus musculus cDNA sequence BC053393 (BC053393), mRNA.	RP23-248K2.9
0.968716	BC053749	146.996	16.3212	142.397	45.426	0.95522	BC053749	Mus musculus cDNA sequence BC053749 (BC053749), mRNA.	MGC59495
0.977675	BC054059	-54.1605	4.06234	-52.9513	5.3692	0.989111	BC054059	Mus musculus cDNA sequence BC054059 (BC054059), mRNA.	RP23-392P11.2; SMAF1
0.600806	BC055111	-70.8532	0.847647	-42.569	32.575	0.756116	BC055111	Mus musculus cDNA sequence BC055111 (BC055111), mRNA.	MGC58608
1.2658	BC055324	23.1231	50.7854	29.2693	12.052	0.949129	BC055324	Mus musculus cDNA sequence BC055324 (BC055324), mRNA.	MGC65590
1.06803	BC055368	389.765	29.0384	416.279	54.0223	0.807809	BC055368
0.805142	BC056474	1500.07	208.073	1207.77	433.652	0.405262	BC056474	Mus musculus cDNA sequence BC056474 (BC056474), mRNA.	MGC107693
0.679071	BC057022	265.372	36.023	180.206	51.8581	0.386438	BC057022	Mus musculus cDNA sequence BC057022 (BC057022), mRNA.	MGC67174
0.418005	BC057170	69.2102	19.5937	28.9302	35.028	0.64504	BC057170	Mus musculus cDNA sequence BC057170 (BC057170), mRNA.	Gbp6; E430029F06
1.08567	BC057371	492.163	53.4862	534.327	12.7698	0.723825	BC057371	Mus musculus cDNA sequence BC057371 (BC057371), mRNA.	RP23-132L14.2; B930030J24
2.03399	BC057552	127.033	42.7622	258.384	18.0884	0.198413	BC057552	Mus musculus cDNA sequence BC057552 (BC057552), mRNA.	MGC66593; 6720484B16
0.892508	BC057627	989.22	91.6583	882.886	206.471	0.559453	BC057627	Mus musculus cDNA sequence BC057627 (BC057627), mRNA.	Gm768; KIAA1064; mKIAA1064; MGC67629
1.06949	BC057893	695.773	29.9689	744.118	226.78	0.794729	BC057893	Mus musculus cDNA sequence BC057893 (BC057893), mRNA.	3010020C06
0.0769139	BC060267	-11.5647	1.33255	-0.889485	1.80452	0.905053	BC060267	Mus musculus cDNA sequence BC060267 (BC060267), mRNA.	BB124106; MGC69711
0.794725	BC060615	185.937	26.5753	147.768	14.5085	0.663016	BC060615
0.713936	BC060632	884.09	192.363	631.184	103.182	0.16519	BC060632	Mus musculus cDNA sequence BC060632 (BC060632), mRNA.	MGC79213
0.156613	BC061039	16.8131	20.9203	2.63316	39.6818	0.879043	BC061039	Mus musculus cDNA sequence BC061039 (BC061039), mRNA.	4931415M17
0.425441	BC061212	-26.9865	6.98433	-11.4812	6.96312	0.86088	BC061212	Mus musculus cDNA sequence BC061212 (BC061212), mRNA.	MGC74356
0.606604	BC061237	74.4258	24.4636	45.147	7.43346	0.748724	BC061237	Mus musculus cDNA sequence BC061237 (BC061237), mRNA.	MGC74390
1.12087	BC062109	304.247	3.18898	341.022	101.856	0.749955	BC062109	Mus musculus cDNA sequence BC062109 (BC062109), mRNA.
0.129943	BC062115	-26.1873	26.5192	-3.40285	12.3677	0.801669	BC062115	Mus musculus cDNA sequence BC062115 (BC062115), mRNA. XM_924416	MGC102234
0.761853	BC062127	114.697	55.2788	87.382	36.3971	0.783321	BC062127	Mus musculus cDNA sequence BC062127 (BC062127), mRNA.	A130081B01
0.778093	BC062650	201.653	16.6109	156.905	14.5397	0.637307	BC062650
-0.104446	BC064033	31.1549	33.9701	-3.25402	15.9974	0.708225	BC064033	Mus musculus cDNA sequence BC064033 (BC064033), mRNA.	B230314O19
0.414838	BC065085	35.8484	9.2844	14.8713	15.046	0.815685	BC065085	Mus musculus cDNA sequence BC065085 (BC065085), mRNA.	A030013D21
1.98385	BC065397	37.0925	23.4132	73.5859	36.5903	0.694263	BC065397	Mus musculus cDNA sequence BC065397 (BC065397), mRNA.	parl7
1.49402	BC066028	1478.65	258.205	2209.14	933.326	0.28998	BC066028	Mus musculus cDNA sequence BC066028 (BC066028), mRNA.
1.15351	BC066107	68.0095	9.28513	78.4495	32.6784	0.90931	BC066107	Mus musculus cDNA sequence BC066107 (BC066107), mRNA.	MGC86136; AI173952
1.18861	BC066135	41.65	5.78669	49.5056	27.3598	0.93104	BC066135	Mus musculus cDNA sequence BC066135 (BC066135), mRNA.	RP23-16P3.6; 4732416F18
0.692234	BC067047	414.738	45.303	287.096	104.553	0.283554	BC067047	Mus musculus cDNA sequence BC067047 (BC067047), mRNA. XM_902966 XM_902967 XM_902969 XM_914522 XM_923276 XM_923283 XM_923288 XM_923292 XM_923299 XM_923308 XM_983285	Setd6; P-REX1; G630042G04; RP23-183N8.1
1.59045	BC067068	30.1558	5.57757	47.9612	32.2295	0.845529	BC067068	Mus musculus cDNA sequence BC067068 (BC067068), mRNA.
2.03925	BC068157	160.881	26.8917	328.078	203.899	0.324727	BC068157	Mus musculus cDNA sequence BC068157 (BC068157), mRNA.
1.65642	BC068281	137.533	13.4224	227.813	122.042	0.466599	BC068281	Mus musculus cDNA sequence BC068281 (BC068281), mRNA.	A430092C04
0.705431	BC080695	-59.1136	6.28495	-41.7006	18.7559	0.845121	BC080695	Mus musculus cDNA sequence BC080695 (BC080695), mRNA.	MGC91106
0.710709	BC085271	542.251	55.9599	385.383	19.5677	0.160158	BC085271	Mus musculus cDNA sequence BC085271 (BC085271), mRNA.	MGC103372
0.664836	BC087945	582.286	93.0466	387.124	40.9629	0.114126	BC087945	Mus musculus cDNA sequence BC087945 (BC087945), mRNA.	C79097
0.530247	BC088983	58.207	12.5891	30.8641	52.362	0.775912	BC088983	Mus musculus cDNA sequence BC088983 (BC088983), mRNA.	4933440G23Rik; KIAA1712; mKIAA1712; MGC113766
1.53342	BC089491	353.653	160.674	542.298	197.536	0.346134	BC089491	Mus musculus cDNA sequence BC089491 (BC089491), mRNA.	Selv; MGC107154
-0.943738	BC094274	-13.7968	34.1319	13.0205	2.11212	0.771316	BC094274	Mus musculus cDNA sequence BC094274 (BC094274), mRNA.	QRFP; P518
0.708661	BC094916	-49.4256	1.23649	-35.026	0.793539	0.871413	BC094916	Mus musculus cDNA sequence BC094916 (BC094916), mRNA.
0.434424	BC099439	-38.6953	7.90305	-16.8102	10.3405	0.80603	BC099439	Mus musculus cDNA sequence BC099439 (BC099439), mRNA.
0.553889	BC107230	-4.4561	19.5442	-2.46818	6.1943	0.982345	BC107230	Mus musculus cDNA sequence BC107230 (BC107230), mRNA.	MGC130166; MGC130165; Tessp5
0.521833	BC117090	-56.5231	12.9731	-29.4956	15.1754	0.761047	BC117090	Mus musculus cDNA sequence BC1179090 (BC117090), mRNA.
1.20225	Bcam	123.353	30.1747	148.301	64.1857	0.804807	BCAM	Mus musculus basal cell adhesion molecule (Bcam), mRNA.	1200005K12Rik; Lu; B-CAM; Gplu
0.509634	Bcan	376.93	8.18278	192.096	120.317	0.145776	BCAN	Mus musculus brevican (Bcan), mRNA.	Cspg7
0.80492	Bcap29	923.583	42.929	743.411	201.425	0.296072	BCAP29	Mus musculus B-cell receptor-associated protein 29 (Bcap29), mRNA.	Bap29; AW208404
0.755115	Bcap31	1383.46	67.5275	1044.67	411.893	0.248797	BCAP31	Mus musculus B-cell receptor-associated protein 31 (Bcap31), mRNA.	Bap31
0.698878	Bcar1	541.525	11.369	378.459	52.3486	0.130901	BCAR1	Mus musculus breast cancer anti-estrogen resistance 1 (Bcar1), mRNA.	Crkas; AI385681; Cas
2.39893	Bcar3	-6.6517	1.60856	-15.957	17.0549	0.916976	BCAR3	Mus musculus breast cancer anti-estrogen resistance 3 (Bcar3), mRNA.	AND-34; AI131758
0.625778	Bcas1	11108.1	1946.6	6951.2	5749.21	0.332886	BCAS1	Mus musculus breast carcinoma amplified sequence 1 (Bcas1), mRNA.	2210416M21Rik; AI841227; NABC1; 9030223A09Rik
1.1054	Bcas2	3799.64	151.361	4200.15	352.664	0.424691	BCAS2	Mus musculus breast carcinoma amplified sequence 2 (Bcas2), mRNA.	C76366; C80030; AI132645; MGC7712; 6430539P16Rik
1.13072	Bcas3	522.756	53.3228	591.092	81.4882	0.581977	BCAS3	Mus musculus breast carcinoma amplified sequence 3 (Bcas3), mRNA.	rudhira; 2610028P08Rik; BC028339; K20D4; AU021018; 1500019F07Rik
1.07323	Bcat1	2427.49	407.242	2605.25	611.456	0.7358	BCAT1	Mus musculus branched chain aminotransferase 1, cytosolic (Bcat1), transcript variant 2, mRNA.	Eca39; BCATc
0.818433	Bcat2	58.2935	2.22307	47.7093	23.7872	0.907217	BCAT2	Mus musculus branched chain aminotransferase 2, mitochondrial (Bcat2), mRNA.	Bcat-2; Eca40
0.865427	Bccip	1032.9	99.1278	893.899	117.105	0.382098	BCCIP	Mus musculus BRCA2 and CDKN1A interacting protein (Bccip), mRNA.	TOK-1; 1110013J05Rik
-0.306353	Bcdin3d	-26.045	13.5736	7.97896	2.47039	0.704151	BCDIN3D	Mus musculus BCDIN3 domain containing (Bcdin3d), mRNA.	4930556P03Rik; AV138748
-1.06097	Bcdo2	1.92906	20.5827	-2.04667	1.44361	0.964748	BCDO2	Mus musculus beta-carotene 9', 10'-dioxygenase 2 (Bcdo2), mRNA.	B-diox-II; MGC129323; MGC129322; CMO2
0.494536	Bche	148.51	6.51862	73.4436	3.4011	0.414207	BCHE	Mus musculus butyrylcholinesterase (Bche), mRNA.	C730038G20Rik; MGC107651
1.16496	Bckdha	225.321	22.4807	262.489	59.4911	0.708839	BCKDHA	Mus musculus branched chain ketoacid dehydrogenase E1, alpha polypeptide (Bckdha), mRNA.
1.02239	Bckdhb	3160.66	248.919	3231.45	438.465	0.865689	BCKDHB	Mus musculus branched chain ketoacid dehydrogenase E1, beta polypeptide (Bckdhb), nuclear gene encoding mitochondrial protein, mRNA.
1.21022	Bckdk	80.7244	2.57899	97.6941	50.8618	0.864442	BCKDK	Mus musculus branched chain ketoacid dehydrogenase kinase (Bckdk), nuclear gene encoding mitochondrial protein, mRNA.	AI327402
0.473793	Bcl10	696.606	117.699	330.047	64.8127	0.005165	BCL10	Mus musculus B-cell leukemia/lymphoma 10 (Bcl10), mRNA.	CARMEN; cE10; C81403; BCL-10; CLAP; CIPER; ME10; AI132454
2.13627	Bcl11a	211.309	47.8387	451.411	239.575	0.215129	BCL11A	Mus musculus B-cell CLL/lymphoma 11A (zinc finger protein) (Bcl11a), mRNA.	2810047E18Rik; Evi9; mKIAA1809; Ctip1; D930021L15Rik
288.017	Bcl11b	0.211668	13.1783	60.9638	75.8425	0.556736	BCL11B	Mus musculus B-cell leukemia/lymphoma 11B (Bcl11b), transcript variant 2, mRNA.	B630002E05Rik; AI604821; Rit1; 9130430L19Rik; Ctip2
0.869968	Bcl2	524.383	0.821609	456.196	74.4089	0.551646	BCL2	Mus musculus B-cell leukemia/lymphoma 2 (Bcl2), transcript variant 1, mRNA.	D630044D05Rik; AW986256; C430015F12Rik; Bcl-2; D830018M01Rik
-0.924093	Bcl2a1c	19.6415	29.2165	-18.1506	4.84154	0.677532	BCL2A1C	Mus musculus B-cell leukemia/lymphoma 2 related protein A1c (Bcl2a1c), mRNA.	A1-c
2.04223	Bcl2a1d	-18.4765	44.058	-37.7332	33.2696	0.840881	BCL2A1D	Mus musculus B-cell leukemia/lymphoma 2 related protein A1d (Bcl2a1d), mRNA.	A1-d
0.784816	Bcl2l1	720.873	80.3519	565.753	202.831	0.184356	BCL2L1	Mus musculus BCL2-like 1 (Bcl2l1), nuclear gene encoding mitochondrial protein, mRNA.	Bcl(X)L; BclX; Bcl-Xs; MGC99998; Bcl2l; bcl-x; Bcl-XL; MGC113803
0.743708	Bcl2l10	-25.888	10.7504	-19.2531	4.00164	0.940242	BCL2L10	Mus musculus Bcl2-like 10 (Bcl2l10), mRNA.	C85687; AU023065; Diva; Boo; AA420380
0.748921	Bcl2l11	186.921	22.9752	139.989	57.434	0.633185	BCL2L11
0.0817952	Bcl2l12	-21.4738	16.2172	-1.75645	27.4238	0.837736	BCL2L12	Mus musculus BCL2-like 12 (proline rich) (Bcl2l12), mRNA.	Bcl-L12; 5430429M05Rik; Bcl2-L12; 2810475P17Rik
-2.36019	Bcl2l13	-8.44723	24.7143	19.937	13.5973	0.754814	BCL2L13	Mus musculus BCL2-like 13 (apoptosis facilitator) (Bcl2l13), nuclear gene encoding mitochondrial protein, mRNA.	Mil-1; MGC38758; BCL-RAMBO; E430016C20Rik; Mil1
0.610379	Bcl2l14	-58.5756	0.94827	-35.7533	22.12	0.79994	BCL2L14	Mus musculus BCL2-like 14 (apoptosis facilitator) (Bcl2l14), mRNA.	Bclg; 4933405K19Rik; AI429211; 9030625M01Rik; 4930452K23Rik
1.06386	Bcl2l2	691.667	37.7852	735.84	32.3508	0.882353	BCL2L2	Mus musculus BCL2-like 2 (Bcl2l2), mRNA.	c98; Bcl-w; bclw; Gtrosa41; Gtrgal2; AW048834
1.05224	Bcl3	-15.6003	13.1991	-16.4152	9.13063	0.992712	BCL3	Mus musculus B-cell leukemia/lymphoma 3 (Bcl3), mRNA.	AI528691; Bcl-3
0.785296	Bcl6	1432.59	227.325	1125.01	46.9219	0.179806	BCL6	Mus musculus B-cell leukemia/lymphoma 6 (Bcl6), mRNA.	Bcl5
0.914281	Bcl6b	106.689	75.6483	97.5439	78.5422	0.937543	BCL6B	Mus musculus B-cell CLL/lymphoma 6, member B (Bcl6b), mRNA.	Bazf
1.37481	Bcl7a	691.763	12.9815	951.043	270.612	0.223766	BCL7A	Mus musculus B-cell CLL/lymphoma 7A (Bcl7a), mRNA.	AI448316; 4432415N06Rik
1.34124	Bcl7b	192.745	0.467221	258.517	87.4911	0.614055	BCL7B	Mus musculus B-cell CLL/lymphoma 7B (Bcl7b), mRNA.
0.44563	Bcl9	810.844	174.24	361.337	91.6386	0.00627881	BCL9	Mus musculus B-cell CLL/lymphoma 9 (Bcl9), mRNA.	8030475K17Rik; Gm130; 2610202E01Rik; A330041G23Rik
1.14428	Bcl9l	483.16	76.4919	552.871	85.6873	0.702441	BCL9L	Mus musculus B-cell CLL/lymphoma 9-like (Bcl9l), mRNA.	B9L; MGC7014; DLNB11; BC003321; BCL9-2
1.88659	Bclaf1	2059.67	119.452	3885.75	1251.73	0.0322041	BCLAF1	Mus musculus BCL2-associated transcription factor 1 (Bclaf1), transcript variant 2, mRNA.	AI450190; 2610102K23Rik; AW556225; Btf; mKIAA0164; 5730534O06Rik; 2700025J07Rik; MGC58035; MGC30519; KIAA0164; 2810454G14Rik
0.174257	Bclp2	-40.6618	9.86032	-7.0856	14.2633	0.705651	BCLP2	Mus musculus chitinase like protein 2 (Bclp2), mRNA.	Bclp; MGC156874; Bclp1
0.845409	Bcmo1	-54.3832	0.795673	-45.976	22.6782	0.925252	BCMO1	Mus musculus beta-carotene 15,15'-monooxygenase (Bcmo1), mRNA.	beta-CD; Bcdo1; Bcdo; betaCMOOX
0.760001	Bcor	54.6216	39.7904	41.5125	9.05797	0.869695	BCOR
1.25723	Bcorl1	138.314	13.8359	173.893	35.2865	0.718787	BCORL1	Mus musculus BCL6 co-repressor-like 1 (Bcorl1), mRNA.	6720425J07Rik; B930011H20Rik
0.953303	Bcs1l	283.245	47.4166	270.018	12.5249	0.898498	BCS1L	Mus musculus BCS1-like (yeast) (Bcs1l), mRNA.	9130022O19Rik
0.979362	Bdh1	476.031	57.4569	466.207	116.868	0.932121	BDH1	Mus musculus 3-hydroxybutyrate dehydrogenase, type 1 (Bdh1), mRNA.	AI327223; Bdh; 2310032J20Rik
0.393489	Bdh2	269.016	8.35007	105.855	96.747	0.148649	BDH2	Mus musculus 3-hydroxybutyrate dehydrogenase, type 2 (Bdh2), mRNA.	1810026B04Rik; Dhrs6
0.197371	Bdkrb1	-33.3941	8.59326	-6.591	21.223	0.764596	BDKRB1	Mus musculus bradykinin receptor, beta 1 (Bdkrb1), mRNA.	BKR1; B1BKR; Bdkrb; B1R; BRADYB1
0.0973618	Bdkrb2	-15.3416	14.6332	-1.49369	1.47573	0.876998	BDKRB2	Mus musculus bradykinin receptor, beta 2 (Bdkrb2), mRNA.	BRB2; BK-2; B2; B(2); BK2; BK2R; B2R; BKR2
3.06329	Bdnf	29.9025	13.4901	91.5999	36.2986	0.496019	BDNF	Mus musculus brain derived neurotrophic factor (Bdnf), transcript variant 3, mRNA.
0.90002	Becn1	371.332	11.6722	334.206	35.5986	0.745069	BECN1	Mus musculus beclin 1 (coiled-coil, myosin-like BCL2-interacting protein) (Becn1), mRNA.	5430417M23Rik; MGC6843; 4921513J16Rik
-0.108605	Bend5	-45.3849	20.4874	4.92902	2.22503	0.576432	BEND5	Mus musculus BEN domain containing 5 (Bend5), mRNA.
-8.05005	Bend7	-6.35462	1.53005	51.155	8.79602	0.525648	BEND7	Mus musculus BEN domain containing 7 (Bend7), mRNA.	1110017O21Rik; RP23-198G1.1
1.33891	Best2	-27.006	25.0835	-36.1587	8.74735	0.919007	BEST2	Mus musculus bestrophin 2 (Best2), mRNA.	Vmd2l1
0.45309	Best3	-13.1339	11.1487	-5.95083	18.6755	0.931857	BEST3	Mus musculus bestrophin 3 (Best3), mRNA.	Vmd2l3; mBest4
0.493673	Bet1	551.993	59.8526	272.504	74.9204	0.0116431	BET1	Mus musculus blocked early in transport 1 homolog (S. cerevisiae) (Bet1), mRNA.	AW555236; Bet-1
1.04252	Bet1l	787.085	57.1959	820.555	102.504	0.814108	BET1L	Mus musculus blocked early in transport 1 homolog (S. cerevisiae)-like (Bet1l), mRNA.	Gs15; 2610021K23Rik
1.48643	Bex1	3440.73	0.139092	5114.42	1087.86	0.0326945	BEX1	Mus musculus brain expressed gene 1 (Bex1), mRNA.	AA407839; Rex3; MGC107097; AU018692; Bex4
1.21383	Bex2	3914.7	146.866	4751.8	1077.31	0.344259	BEX2	PREDICTED: Mus musculus brain expressed X-linked 2 (Bex2), mRNA.
1.82929	Bex4	755.111	31.3794	1381.31	672.302	0.192371	BEX4	Mus musculus brain expressed gene 4 (Bex4), mRNA.
0.698551	Bex6	-48.526	0.413859	-33.8979	7.22597	0.869219	BEX6	Mus musculus brain expressed gene 6 (Bex6), mRNA.	B020003O03Rik
1.10288	Bfar	203.458	8.77418	224.39	20.5505	0.845195	BFAR	Mus musculus bifunctional apoptosis regulator (Bfar), mRNA.	BAR; AW107665; 3010001A07Rik; AI666707; RNF47
-0.484811	Bfsp2	27.3187	21.2065	-13.2444	7.0587	0.651634	BFSP2	Mus musculus beaded filament structural protein 2, phakinin (Bfsp2), mRNA.	5830418P13Rik; CP49; AI448593
-0.0747212	Bglap1	-14.7298	1.84641	1.10063	9.93844	0.856196	BGLAP1	Mus musculus bone gamma carboxyglutamate protein 1 (Bglap1), transcript variant 1, mRNA.	OC; mOC-A; Bglap; OG1
3.15556	Bglap2	-4.97419	24.6806	-15.6964	21.3127	0.905789	BGLAP2	Mus musculus bone gamma-carboxyglutamate protein 2 (Bglap2), mRNA.	OG2; mOC-B
2.77871	Bglap-rs1	-5.83137	3.53736	-16.2037	16.9644	0.907495	BGLAP-RS1	Mus musculus bone gamma-carboxyglutamate protein, related sequence 1 (Bglap-rs1), mRNA.	MGC123552; mOC-X; ORG; AI461847
0.462161	Bgn	3324.97	2079.22	1536.67	122.751	0.228245	BGN	Mus musculus biglycan (Bgn), mRNA.	SLRR1A; BG; PG-S1; PGI; DSPG1
0.821363	Bhlhb2	1661.07	123.696	1364.34	290.277	0.21575	BHLHB2	Mus musculus basic helix-loop-helix domain containing, class B2 (Bhlhb2), mRNA.	Clast5; Stra14; Dec1; Stra13; C130042M06Rik; CR8; Sharp2
0.852933	Bhlhb3	-68.1913	22.8279	-58.1627	28.2468	0.912532	BHLHB3	Mus musculus basic helix-loop-helix domain containing, class B3 (Bhlhb3), mRNA.	Bhlhb2l; Sharp1; DEC2
0.872669	Bhlhb4	-35.858	14.6791	-31.2922	21.1566	0.959309	BHLHB4	Mus musculus basic helix-loop-helix domain containing, class B4 (Bhlhb4), mRNA.	BETA4; A930001L02Rik
0.609169	Bhlhb5	268.986	68.0486	163.858	13.6329	0.317245	BHLHB5	Mus musculus basic helix-loop-helix domain containing, class B5 (Bhlhb5), mRNA.	Beta3
0.673413	Bhlhb8	-47.4655	0.741806	-31.9639	0.481493	0.858138	BHLHB8	Mus musculus basic helix-loop-helix domain containing, class B, 8 (Bhlhb8), mRNA.	1810009C13Rik; Mist1
1.28926	Bhlhb9	3018.04	216.775	3891.03	3.84371	0.0665686	BHLHB9	Mus musculus basic helix-loop-helix domain containing, class B9 (Bhlhb9), mRNA.	2700087I09Rik
0.545983	Bhmt	-91.457	22.6096	-49.9339	25.7211	0.647804	BHMT	Mus musculus betaine-homocysteine methyltransferase (Bhmt), mRNA.	MGC117976; MGC46866
0.582301	Bhmt2	-84.6614	1.2383	-49.2984	6.0378	0.689566	BHMT2	Mus musculus betaine-homocysteine methyltransferase 2 (Bhmt2), mRNA.	C81077; D13Ucla2
1.02899	Bicc1	-26.7295	21.3849	-27.5045	18.4882	0.993119	BICC1	Mus musculus bicaudal C homolog 1 (Drosophila) (Bicc1), mRNA.	jcpk; MGC124370; Bic-C; bpk
0.911414	Bicd1	278.796	74.3683	254.098	109.674	0.847327	BICD1	Mus musculus bicaudal D homolog 1 (Drosophila) (Bicd1), mRNA.	B830009D06Rik; mKIAA4125; KIAA4125
1.35478	Bicd2	1276.4	16.3632	1729.24	461.764	0.232995	BICD2	Mus musculus bicaudal D homolog 2 (Drosophila) (Bicd2), transcript variant 3, mRNA.	KIAA0699; 1110005D12Rik; 0610027D24Rik; AA408834; mKIAA0699
1.00063	Bid	205.937	4.83475	206.067	47.9247	0.928181	BID	Mus musculus BH3 interacting domain death agonist (Bid), mRNA.	AI875481; AU022477; 2700049M22Rik
0.37875	Bik	-63.3487	17.5061	-23.9933	1.60148	0.659343	BIK	Mus musculus BCL2-interacting killer (Bik), mRNA.	Nbk; Blk; Biklk
1.17409	Bin1	656.731	24.9216	771.059	81.1327	0.436881	BIN1	Mus musculus bridging integrator 1 (Bin1), transcript variant 2, mRNA.	BRAMP-2; Amphl; SH3P9; ALP-1
-0.042999	Bin3	-21.3631	0.0179144	0.918591	24.6165	0.804435	BIN3	Mus musculus bridging integrator 3 (Bin3), mRNA.	1700015F07Rik
1.29953	Birc2	1227.64	106.18	1595.35	464.397	0.351719	BIRC2	Mus musculus baculoviral IAP repeat-containing 2 (Birc2), mRNA.	Api2; MIHC; MIAP2; IAP2; Birc3; MIHB; MIAP1; RNF48; HIAP2; HIAP1; Api1; AW146227; cIAP-2; IAP1; cIAP-1; cIAP1; mcIAP1; cIAP2
0.77898	Birc3	-48.4547	1.89256	-37.7453	1.91758	0.903999	BIRC3	Mus musculus baculoviral IAP repeat-containing 3 (Birc3), mRNA.	RNF49; Api2; MIHC; MIAP2; IAP2; MIHB; MIAP1; Birc2; Api1; HIAP2; cIAP-2; IAP1; AW107670; cIAP1; cIAP-1; cIAP2
0.556184	Birc4	157.789	19.8915	87.7599	14.0052	0.459734	BIRC4	Mus musculus baculoviral IAP repeat-containing 4 (Birc4), mRNA.	Aipa; ILP-1; XIAP; mXIAP; MIHA; Api3; IAP3
-0.831542	Birc5	17.6453	53.0229	-14.6728	22.4151	0.732261	BIRC5
1.86913	Birc6	516.412	2.10065	965.24	497.707	0.21725	BIRC6	Mus musculus baculoviral IAP repeat-containing 6 (Birc6), mRNA.	A430032G04Rik; AA501170; A430040A19Rik; D630005A10Rik; mKIAA1289; Bruce
1.47213	Bivm	234.725	92.913	345.545	18.6995	0.361454	BIVM	Mus musculus basic, immunoglobulin-like variable motif containing (Bivm), mRNA.	AI854267
1.63612	Blcap	642.483	76.0373	1051.18	471.491	0.241419	BLCAP	Mus musculus bladder cancer associated protein homolog (human) (Blcap), mRNA.	AI462828; Bc10; MGC102074
0.107505	Blk	15.1918	15.9489	1.63319	2.60636	0.859078	BLK	Mus musculus B lymphoid kinase (Blk), mRNA.
23.4167	Blm	2.03603	2.60791	47.677	27.6101	0.621324	BLM	Mus musculus Bloom syndrome homolog (human) (Blm), transcript variant 2, mRNA.
1.18245	Blmh	1227.73	74.6929	1451.73	457.277	0.508946	BLMH	Mus musculus bleomycin hydrolase (Blmh), mRNA.	AI035728; MGC37104; MGC39026; MGC36899; BMH; BH
0.589602	Blnk	125.053	28.9139	73.7315	26.8005	0.584241	BLNK	Mus musculus B-cell linker (Blnk), mRNA.	Ly57; SLP-65; Bca; BASH; Lyw-57; Ly-57
0.625861	Bloc1s1	974.306	13.4312	609.78	196.593	0.0317625	BLOC1S1	Mus musculus biogenesis of lysosome-related organelles complex-1, subunit 1 (Bloc1s1), mRNA.	AI839753; Gcn5l1; BLOS1
0.569112	Bloc1s3	50.2742	11.6554	28.6116	17.2525	0.810497	BLOC1S3
0.904933	Blvra	894.896	206.894	809.821	26.1469	0.669727	BLVRA
0.392213	Blvrb	148.057	11.2663	58.0699	42.5466	0.338695	BLVRB	Mus musculus biliverdin reductase B (flavin reductase (NADPH)) (Blvrb), mRNA.	MGC27866; MGC11726
1.02185	Bmf	56.9515	26.5585	58.1958	51.3194	0.98973	BMF
0.941844	Bmi1	366.741	37.1255	345.413	116.535	0.862454	BMI1	Mus musculus Bmi1 polycomb ring finger oncogene (Bmi1), mRNA.	Pcgf4; AW546694; Bmi-1
1.64438	Bmp1	409.608	20.0584	673.549	488.658	0.700457	BMP1	Mus musculus bone morphogenetic protein 1 (Bmp1), mRNA.	TLD
0.364551	Bmp10	52.7769	18.576	19.2399	18.3102	0.709907	BMP10	Mus musculus bone morphogenetic protein 10 (Bmp10), mRNA.
0.660334	Bmp15	-77.9934	18.2127	-51.5017	23.4439	0.768717	BMP15	Mus musculus bone morphogenetic protein 15 (Bmp15), mRNA.	Bmp-15; AU021453; AU018861; C86824; AU015375; GDF-9B; C87336
1.37894	Bmp2	-15.4303	17.2802	-21.2775	8.10864	0.947791	BMP2
0.421453	Bmp2k	65.2452	8.89276	27.4978	33.3491	0.672499	BMP2K	Mus musculus BMP2 inducible kinase (Bmp2k), mRNA.	AV128808; AA673486; BIKE; 4933417M22Rik
0.955581	Bmp3	-25.734	8.28317	-24.5909	11.0316	0.989759	BMP3	Mus musculus bone morphogenetic protein 3 (Bmp3), mRNA.	9130206H07; 9530029I04Rik
0.290601	Bmp4	95.5843	36.0465	27.7769	65.8687	0.508039	BMP4	Mus musculus bone morphogenetic protein 4 (Bmp4), mRNA.	Bmp2b1; Bmp2b-1; Bmp2b
0.481034	Bmp5	418.422	50.6347	201.275	59.5599	0.0360685	BMP5	Mus musculus bone morphogenetic protein 5 (Bmp5), mRNA.	AU023399; se
0.176583	Bmp6	102.263	0.260455	18.0578	32.4884	0.358902	BMP6	Mus musculus bone morphogenetic protein 6 (Bmp6), mRNA.	Vgr-1; D13Wsu115e; Vgr1
-0.336358	Bmp7	39.3916	27.587	-13.2497	17.5497	0.561669	BMP7	Mus musculus bone morphogenetic protein 7 (Bmp7), mRNA.	OP1
0.743788	Bmp8a	-54.356	10.6373	-40.4294	9.1433	0.875291	BMP8A	Mus musculus bone morphogenetic protein 8a (Bmp8a), mRNA.	OP-2; OP2; Bmp7r1
0.751229	Bmp8b	-33.585	9.83427	-25.23	5.33329	0.925223	BMP8B	Mus musculus bone morphogenetic protein 8b (Bmp8b), mRNA.	Op3
0.901219	Bmper	221.091	13.6228	199.252	35.2319	0.821294	BMPER	Mus musculus BMP-binding endothelial regulator (Bmper), mRNA.	CV-2; Cv2; 3110056H04Rik; Crim3
0.527081	Bmpr1a	611.233	43.3018	322.169	2.58817	0.00569366	BMPR1A	Mus musculus bone morphogenetic protein receptor, type 1A (Bmpr1a), mRNA.	BMPR-IA; Bmpr; AU045487; 1110037I22Rik; ALK3
0.243334	Bmpr1b	210.501	12.9222	51.222	44.7187	0.0947775	BMPR1B	Mus musculus bone morphogenetic protein receptor, type 1B (Bmpr1b), mRNA.	Acvrlk6; AI385617; CFK-43a; Alk6; AV355320; ALK-6; BMPR-IB
0.9802	Bmpr2	528.905	151.097	518.433	161.605	0.960404	BMPR2	Mus musculus bone morphogenic protein receptor, type II (serine/threonine kinase) (Bmpr2), mRNA.	2610024H22Rik; AL117858; AW546137; BMPR-II; BMP-2; BB189135
1.4621	Bms1	427.766	27.9372	625.436	244.683	0.312131	BMS1	Mus musculus BMS1 homolog, ribosome assembly protein (yeast) (Bms1), mRNA.	AA408648; BC030906; KIAA0187; mKIAA0187; BB007109; Bms1l; AU020092; AU043373
0.727913	Bmx	43.6388	10.2285	31.7653	28.3533	0.914482	BMX	Mus musculus BMX non-receptor tyrosine kinase (Bmx), mRNA.	Etk; Etk/Bmx; Tyro8
0.981435	Bmyc	582.627	91.3093	571.811	347.264	0.967876	BMYC	Mus musculus brain expressed myelocytomatosis oncogene (Bmyc), mRNA.	AW060705; 2900002K07Rik
0.916663	Bnc1	77.6123	94.7022	71.1443	42.4023	0.954865	BNC1	Mus musculus basonuclin 1 (Bnc1), mRNA.	AI047752; AW546376; Bnc
2.26405	Bnc2	191.521	80.1887	433.613	266.132	0.274647	BNC2	Mus musculus basonuclin 2 (Bnc2), mRNA.	MGC124423; MGC124424; 5031434M05Rik
1.45031	Bnip1	126.732	25.4383	183.801	61.2155	0.565734	BNIP1	Mus musculus BCL2/adenovirus E1B interacting protein 1 (Bnip1), mRNA.	Sec20; MGC41600; 5930429G21Rik
0.997309	Bnip2	273.01	14.9369	272.275	236.722	0.981883	BNIP2	Mus musculus BCL2/adenovirus E1B interacting protein 2 (Bnip2), transcript variant beta, mRNA.	BNIP2beta; 5730523P12Rik; Nip21
0.484236	Bnip3	-58.6878	18.7136	-28.4187	6.52767	0.734745	BNIP3	Mus musculus BCL2/adenovirus E1B interacting protein 3 (Bnip3), nuclear gene encoding mitochondrial protein, mRNA.	Nip3
0.544451	Bnip3l	1338.78	190.67	728.902	155.166	0.00172989	BNIP3L	Mus musculus BCL2/adenovirus E1B interacting protein 3-like (Bnip3l), mRNA.	C86132; Nip3L; D14Ertd719e; Nix
1.20936	Bnipl	155.047	30.361	187.508	33.2965	0.631019	BNIPL	Mus musculus BCL2/adenovirus E1B 19kD interacting protein like (Bnipl), mRNA.	BNIPL-2; BNIP-S; PP73; BNIPL-1; BNIPL1; BNIPL2; 1700128A13Rik; PP753; MGC8103
0.720279	Boc	-61.1378	21.2648	-44.0363	5.79315	0.848329	BOC	Mus musculus biregional cell adhesion molecule-related/down-regulated by oncogenes (Cdon) binding protein (Boc), mRNA.	mFLJ00376; 4732455C11; DKFZp434L072
0.917945	Bok	219.672	86.6276	201.647	84.0581	0.938031	BOK	Mus musculus BCL2-related ovarian killer protein (Bok), mRNA.	AI847676; mtd; AU021146; matador
1.23099	Bola1	-4.22261	12.2906	-5.19797	34.2143	0.991505	BOLA1	Mus musculus bolA-like 1 (E. coli) (Bola1), mRNA.	1810037G04Rik
0.674209	Bola2	2547.3	109.598	1717.41	24.0848	0.000541318	BOLA2	Mus musculus bolA-like 2 (E. coli) (Bola2), mRNA.	1110025L05Rik; BolA-2
0.722777	Bola3	314.965	34.3686	227.649	52.5355	0.37847	BOLA3	Mus musculus bolA-like 3 (E. coli) (Bola3), mRNA.	1810056O20Rik
0.00278073	Boll	-43.9074	12.3117	-0.122095	33.9529	0.63194	BOLL	Mus musculus bol, boule-like (Drosophila) (Boll), mRNA.	4930554P13Rik; 4930597B14Rik
1.5027	Bop1	215.276	20.2627	323.495	47.9105	0.291408	BOP1	Mus musculus block of proliferation 1 (Bop1), mRNA.	D18861; AW146150; Erb1p; Kiaa0124; mKIAA0124; AU020183
0.217108	Bpgm	-18.7052	18.486	-4.06106	33.0747	0.873006	BPGM	Mus musculus 2,3-bisphosphoglycerate mutase (Bpgm), mRNA.	C86192; AL022789; AI323730
1.17379	Bphl	43.2905	16.0809	50.8142	76.3576	0.942176	BPHL	Mus musculus biphenyl hydrolase-like (serine hydrolase, breast epithelial mucin-associated antigen) (Bphl), mRNA.	5730533B08Rik; 2010012D11Rik; AI115341
0.6551	Bpi	-49.2507	5.42634	-32.2642	16.9994	0.84863	BPI	Mus musculus bactericidal permeablility increasing protein (Bpi), mRNA.	9230105K17Rik
0.75235	Bpil1	-51.3642	40.4597	-38.6438	1.9044	0.890899	BPIL1	Mus musculus bactericidal/permeability-increasing protein-like 1 (Bpil1), mRNA.	RYSR; MGC144837; 2310034L21Rik; LPLUNC2; AV089125; MGC144836; 2310069A01Rik
-23.6513	Bpil2	-6.92881	6.68592	163.876	6.37715	0.0696256	BPIL2	Mus musculus bactericidal/permeability-increasing protein-like 2 (Bpil2), mRNA.	4732454E24; MGC130596
0.750069	Bpil3	-65.5054	2.33045	-49.1336	24.9384	0.855449	BPIL3	Mus musculus bactericidal/permeability-increasing protein-like 3 (Bpil3), mRNA.	Gm119
0.810321	Bpnt1	396.355	26.1327	321.174	125.246	0.571753	BPNT1
0.75733	Brap	317.332	38.6471	240.325	4.9955	0.443466	BRAP	Mus musculus BRCA1 associated protein (Brap), mRNA.	3010002G07Rik
0.967788	Brca1	-28.6855	9.22938	-27.7615	33.7832	0.991937	BRCA1	Mus musculus breast cancer 1 (Brca1), mRNA.
1.54651	Brca2	31.5499	14.0511	48.7922	19.5855	0.83091	BRCA2	Mus musculus breast cancer 2 (Brca2), transcript variant 1, mRNA.	Fancd1; RAB163; AW045498; AI256696
0.731359	Brcc3	245.925	37.9738	179.859	39.0358	0.456609	BRCC3	Mus musculus BRCA1/BRCA2-containing complex, subunit 3 (Brcc3), mRNA.	C6.1A; MGC29148
1.5847	Brd1	190.411	26.755	301.745	104.156	0.337205	BRD1	Mus musculus bromodomain containing 1 (Brd1), mRNA. XM_922207	KIAA4191; mKIAA4191; 1110059H06Rik; AI316859
1.17293	Brd2	2484.27	203.57	2913.88	38.864	0.22493	BRD2	Mus musculus bromodomain containing 2 (Brd2), transcript variant 2, mRNA.	mKIAA4005; Rnf3; AW228947; KIAA4005; Fsrg1; NAT; Ring3; Frg-1; D17H6S113E
1.85533	Brd4	109.52	0.399338	203.195	12.5086	0.361288	BRD4	Mus musculus bromodomain containing 4 (Brd4), transcript variant 2, mRNA.	WI-11513; HUNK1; Brd5; MCAP
1.67564	Brd8	367.227	20.0269	615.341	26.6218	0.0573488	BRD8	Mus musculus bromodomain containing 8 (Brd8), mRNA.	SMAP; 4432404P07Rik; 2610007E11Rik
1.61797	Brd9	454.586	14.8437	735.508	27.4206	0.0325824	BRD9	Mus musculus bromodomain containing 9 (Brd9), mRNA.	AL022779
1.26995	Brdt	25.5273	9.59162	32.4184	4.15953	0.929668	BRDT	Mus musculus bromodomain, testis-specific (Brdt), transcript variant 2, mRNA.	7420412D09Rik; Fsrg3; Brd6
1.64815	Bre	83.2013	24.0536	137.128	119.209	0.728648	BRE	Mus musculus brain and reproductive organ-expressed protein (Bre), transcript variant 1, mRNA.	6030405P19Rik; AI429776; B830038C02Rik
1.28104	Brf1	1122.65	4.31615	1438.16	159.72	0.113161	BRF1	Mus musculus BRF1 homolog, subunit of RNA polymerase III transcription initiation factor IIIB (S. cerevisiae) (Brf1), mRNA.	2510002F24Rik; TAF3C; TAFIII90; GTF3B; TFIIIB90
1.11113	Brf2	138.864	22.4255	154.297	153.581	0.912503	BRF2	Mus musculus BRF2, subunit of RNA polymerase III transcription initiation factor, BRF1-like (Brf2), mRNA.	AU022602; 5730512K07Rik; TFIIIB50; 2700059M06Rik; AU018504; BRFU
0.84565	Bri3	4176.6	38.2619	3531.94	202.707	0.139736	BRI3
0.974708	Brip1	-53.5683	22.377	-52.2135	4.47342	0.987917	BRIP1	Mus musculus BRCA1 interacting protein C-terminal helicase 1 (Brip1), mRNA.	3110009N10Rik; 8030460J03Rik; Bach1; OF
1.05455	Brms1	349.402	15.8096	368.462	168.465	0.89862	BRMS1	Mus musculus breast cancer metastasis-suppressor 1 (Brms1), mRNA.	AW554636; AV003220
33.3819	Brp16	2.30684	32.2047	77.0066	18.4074	0.431517	BRP16	Mus musculus brain protein 16 (Brp16), mRNA.	D15Ertd741e; MNCb-5873
1.32393	Brp17	941.929	42.5994	1247.05	873.159	0.625404	BRP17
0.676119	Brp44	812.809	119.767	549.556	103.648	0.206656	BRP44	Mus musculus brain protein 44 (Brp44), mRNA.	2010002I07Rik; ESTM43; AA108335; 0610006C01Rik; 2610205H19Rik
1.09577	Brpf1	252.314	33.4934	276.478	92.267	0.814338	BRPF1	Mus musculus bromodomain and PHD finger containing, 1 (Brpf1), mRNA.	Brpf2; 4833438B11Rik; 4930540D11Rik
0.849639	Brs3	130.439	15.1258	110.826	35.0404	0.832848	BRS3	Mus musculus bombesin-like receptor 3 (Brs3), mRNA.	BRS-3; MGC129147; MGC129146
-9.87878	Brsk1	-2.70821	0.0420292	26.7538	9.60655	0.743595	BRSK1	Mus musculus BR serine/threonine kinase 1 (Brsk1), mRNA.	Gm1100; MGC99905; SAD-B; SADB
0.862906	Brsk2	275.626	33.5593	237.84	54.0488	0.707829	BRSK2	Mus musculus BR serine/threonine kinase 2 (Brsk2), transcript variant 2, mRNA.	SAD-A; SADA; 4833424K13Rik
1.50329	Brunol4	831.988	57.3584	1250.72	467.582	0.213543	BRUNOL4	Mus musculus bruno-like 4, RNA binding protein (Drosophila) (Brunol4), mRNA. XM_919930 XM_919943 XM_919956 XM_919979 XM_919988 XM_920000 XM_920011 XM_920025 XM_920039	Brul4; A230070D14Rik; C130060B05Rik; BRUNOL-4; CELF4
2.07432	Brwd1	408.712	25.9386	847.801	385.738	0.101401	BRWD1	Mus musculus bromodomain and WD repeat domain containing 1 (Brwd1), mRNA.	D530019K20Rik; Wdr9; 5330419I02Rik
1.18234	Brwd2	472.762	9.74276	558.968	8.08147	0.46862	BRWD2	Mus musculus bromodomain and WD repeat domain containing 2 (Brwd2), mRNA.	mKIAA1351; AW489876; 2900055P10Rik; MGC47139; Wdr11
2.20811	Brwd3	98.1195	1.19284	216.658	184.622	0.514623	BRWD3	Mus musculus bromodomain and WD repeat domain containing 3 (Brwd3), mRNA.	Gm596; Brodl; D030064D06Rik
1.43465	Bscl2	1206.96	255.579	1731.57	736.502	0.347286	BSCL2	Mus musculus Bernardinelli-Seip congenital lipodystrophy 2 homolog (human) (Bscl2), transcript variant 2, mRNA.	Gng3lg; AI046355; 2900097C17Rik
0.959566	Bsdc1	486.061	38.8935	466.408	16.1661	0.861855	BSDC1	Mus musculus BSD domain containing 1 (Bsdc1), mRNA.	1110063F24Rik; AW011758
2.50652	Bsg	23.5817	52.0972	59.108	70.1326	0.734187	BSG
0.971575	Bsn	108.888	33.1628	105.793	4.34309	0.973841	BSN	Mus musculus bassoon (Bsn), mRNA.
1.08651	Bsnd	23.8369	32.4629	25.8991	11.4117	0.982159	BSND	Mus musculus Bartter syndrome, infantile, with sensorineural deafness (Barttin) (Bsnd), mRNA.	MGC47291
0.233587	Bspry	-48.8816	11.7772	-11.4181	14.333	0.674407	BSPRY	Mus musculus B-box and SPRY domain containing (Bspry), mRNA.
10.6729	Bst1	-2.56091	31.3032	-27.3323	9.84266	0.785681	BST1	Mus musculus bone marrow stromal cell antigen 1 (Bst1), mRNA.	A530073F09; 114/A10; Bsta1; BP-3; CD157; Bp3; Ly65
0.794767	Bst2	607.876	52.7664	483.12	162.251	0.402743	BST2	Mus musculus bone marrow stromal cell antigen 2 (Bst2), mRNA.	DAMP-1; C87040; 2310015I10Rik
0.682016	Bsx	152.594	25.0379	104.072	4.82976	0.602141	BSX	Mus musculus brain specific homeobox (Bsx), mRNA.	MGC129478; MGC129479
0.772074	Btbd1	2438.28	194.744	1882.53	199.674	0.0432656	BTBD1	Mus musculus BTB (POZ) domain containing 1 (Btbd1), mRNA.	1190005H08Rik; MGC37676
0.921121	Btbd10	284.534	25.7225	262.09	58.1194	0.822223	BTBD10	Mus musculus BTB (POZ) domain containing 10 (Btbd10), mRNA.	Gmrp1; 1110056N09Rik
1.74529	Btbd11	844.048	83.3914	1473.11	657.331	0.186915	BTBD11	Mus musculus BTB (POZ) domain containing 11 (Btbd11), transcript variant 2, mRNA.	6330404E16Rik
1.71739	Btbd12	213.028	62.2175	365.851	4.64134	0.173442	BTBD12	Mus musculus BTB (POZ) domain containing 12 (Btbd12), mRNA.	AI426760; D16Bwg1016e; AI256635
-0.369804	Btbd16	-36.1362	8.93455	13.3633	34.4799	0.588672	BTBD16	Mus musculus BTB (POZ) domain containing 16 (Btbd16), mRNA.	E330040A16Rik
0.935676	Btbd3	3234.03	464.029	3026	387.695	0.671056	BTBD3
1.22213	Btbd6	165.081	19.8648	201.75	83.3051	0.731594	BTBD6	Mus musculus BTB (POZ) domain containing 6 (Btbd6), mRNA.
-0.010745	Btbd7	-34.5206	4.30279	0.370925	23.837	0.697712	BTBD7	Mus musculus BTB (POZ) domain containing 7 (Btbd7), mRNA.	8030448M07; 5730507E09Rik; MGC49574; mKIAA1525; FUP1; E130118E17Rik
1.84956	Btbd9	144.874	3.14074	267.954	23.7282	0.215394	BTBD9	Mus musculus BTB (POZ) domain containing 9 (Btbd9), mRNA.	1700023F20Rik; 4930402L05; AI464421
0.193425	Btc	-47.5501	10.851	-9.19738	12.0959	0.667283	BTC	Mus musculus betacellulin, epidermal growth factor family member (Btc), mRNA.
0.312052	Btd	88.5979	84.5196	27.6471	19.103	0.570722	BTD	Mus musculus biotinidase (Btd), mRNA.
0.799375	Btf3	990.438	90.6115	791.732	265.48	0.359477	BTF3
-0.351002	Btf3l4	-26.4431	2.82431	9.28158	11.6401	0.690187	BTF3L4	Mus musculus basic transcription factor 3-like 4 (Btf3l4), mRNA.	5730434I03Rik; 4632412E09Rik; AU022207; AW552446; AI316863
0.660342	Btg1	2373.34	12.899	1567.22	311.898	0.00196908	BTG1	Mus musculus B-cell translocation gene 1, anti-proliferative (Btg1), mRNA.	AW546738
1.87311	Btg2	388.696	269.716	728.068	588.613	0.466579	BTG2	Mus musculus B-cell translocation gene 2, anti-proliferative (Btg2), mRNA.	Pc3; AA959598; TIS21; APRO1
3.3141	Btg3	46.7797	5.88443	155.032	129.082	0.49225	BTG3	Mus musculus B-cell translocation gene 3 (Btg3), mRNA.	ANA; tob5
0.0939828	Btg4	-47.9233	23.3877	-4.50397	6.1672	0.630469	BTG4	Mus musculus B-cell translocation gene 4 (Btg4), mRNA.	PC3B; C86116
1.61996	Btk	-27.0912	18.595	-43.8868	10.9168	0.850522	BTK	Mus musculus Bruton agammaglobulinemia tyrosine kinase (Btk), mRNA.	AI528679; xid
1.30351	Btla	45.3739	2.15812	59.1452	54.31	0.886569	BTLA	Mus musculus B and T lymphocyte associated (Btla), transcript variant 2, mRNA.	MGC124217; A630002H24; MGC124218
-0.395078	Btn1a1	-43.1118	8.89669	17.0325	35.8079	0.512205	BTN1A1	Mus musculus butyrophilin, subfamily 1, member A1 (Btn1a1), mRNA.	Btn
-0.0649866	Btn2a2	19.7731	8.54615	-1.28499	3.26479	0.788876	BTN2A2	Mus musculus butyrophilin, subfamily 2, member A2 (Btn2a2), mRNA.	D030063K05; Btn2
0.4116	Btnl2	-25.1688	4.95017	-10.3595	0.782882	0.868257	BTNL2	Mus musculus butyrophilin-like 2 (Btnl2), mRNA.	BTL-II; NG9; Gm315; Btl2
0.755562	Btnl7	-82.8057	11.462	-62.5648	8.53477	0.81889	BTNL7	Mus musculus butyrophilin-like 7 (Btnl7), mRNA.	Gm34
2.63375	Btnl9	-18.532	3.91774	-48.8088	31.9923	0.739765	BTNL9	Mus musculus butyrophilin-like 9 (Btnl9), mRNA.	Btn3; RP23-10M12.3; B430208I01; D330012D11Rik
1.73038	Btrc	353.382	20.4952	611.485	249.716	0.250205	BTRC	Mus musculus beta-transducin repeat containing protein (Btrc), transcript variant 2, mRNA.	Beta-Trcp1; mSlimb; b-TrCP; Slimb; FWD1; mKIAA4123; Fbw1a; KIAA4123; beta-TrCP
0.663186	Bub1	-40.6195	12.9377	-26.9383	10.4993	0.877786	BUB1	Mus musculus budding uninhibited by benzimidazoles 1 homolog (S. cerevisiae) (Bub1), mRNA.	C80208; AL022991; Bub1a; D2Xrf87
0.52117	Bub1b	256.88	162.08	133.878	65.7641	0.417067	BUB1B	Mus musculus budding uninhibited by benzimidazoles 1 homolog, beta (S. cerevisiae) (Bub1b), mRNA.	MGC36092; BUBR1; AU045529
1.14194	Bub3	308.81	10.9093	352.643	189.677	0.786237	BUB3	Mus musculus budding uninhibited by benzimidazoles 3 homolog (S. cerevisiae) (Bub3), mRNA.	AU019800; AU021329; AU043350; AW146323; C78067
0.731518	Bud13	443.571	1.61871	324.48	19.6212	0.252979	BUD13	Mus musculus BUD13 homolog (yeast) (Bud13), mRNA.	MGC38070; D030060M11Rik; AV305342
0.539141	Bud31	809.371	18.747	436.365	76.2061	0.00105673	BUD31	Mus musculus BUD31 homolog (yeast) (Bud31), mRNA.	EDG-2; C77604; EDG2; G10
0.872901	Butr1	-59.7559	14.2168	-52.161	31.8575	0.933499	BUTR1	Mus musculus butyrophilin related 1 (Butr1), mRNA.	BUTR-1
0.684298	Bves	181.881	23.3917	124.461	36.2625	0.539837	BVES
0.929083	Bxdc1	284.398	28.9658	264.229	61.6371	0.813266	BXDC1
0.610459	Bxdc2	508.915	58.8046	310.672	57.2809	0.0855047	BXDC2	Mus musculus brix domain containing 2 (Bxdc2), mRNA.	C76935; 1110064N10Rik
0.884199	Bxdc5	73.1517	6.47056	64.6806	11.4111	0.927537	BXDC5	Mus musculus brix domain containing 5 (Bxdc5), transcript variant 1, mRNA.	2310066N05Rik; Rpf1; MGC102255; 2210420E24Rik
0.598168	BY080835	-70.0002	4.40413	-41.8719	23.6877	0.753804	BY080835	Mus musculus cDNA sequence BY080835 (BY080835), mRNA.
0.238252	Bysl	23.2885	45.8721	5.54852	27.1165	0.852437	BYSL	Mus musculus bystin-like (Bysl), mRNA.	Enp1; Bys
2.37631	Bzrap1	453.681	20.5419	1078.09	59.764	0.000108637	BZRAP1	Mus musculus benzodiazapine receptor associated protein 1 (Bzrap1), mRNA.	D230016K05; mKIAA0612
0.776003	Bzrpl1	-45.362	10.1981	-35.2011	6.45356	0.908939	BZRPL1	Mus musculus benzodiazapine receptor, peripheral-like 1 (Bzrpl1), mRNA.	MGC129410; MGC129411; 2510027D20Rik
0.660961	Bzw1	1375	14.2759	908.82	156.626	0.00252223	BZW1
1.13585	Bzw2	296.204	19.1634	336.442	116.084	0.747173	BZW2	Mus musculus basic leucine zipper and W2 domains 2 (Bzw2), mRNA.	1110001I24Rik; Bdm2; HSPC028; MGC7203
0.869136	C030006K11Rik	86.9555	30.0444	75.5761	25.323	0.90261	C030006K11RIK	Mus musculus RIKEN cDNA C030006K11 gene (C030006K11Rik), mRNA.	MGC38904; 1110033I13Rik
1.17202	C030011O14Rik	1050.77	76.5847	1231.52	427.139	0.571106	C030011O14RIK
0.958445	C030014K22Rik	148.197	7.64642	142.039	34.0182	0.935497	C030014K22RIK	Mus musculus RIKEN cDNA C030014K22 gene (C030014K22Rik), mRNA.	C030020L09Rik
2.02624	C030018G13Rik	622.233	92.2729	1260.79	239.986	0.00155596	C030018G13RIK	PREDICTED: Mus musculus RIKEN cDNA C030018G13 gene (C030018G13Rik), mRNA.
2.3065	C030019I05Rik	425.397	118.623	981.179	132.894	0.00125203	C030019I05RIK	Mus musculus RIKEN cDNA C030019I05 gene (C030019I05Rik), mRNA.	MGC27121; RP23-370F7.2; MGC129499; MGC129498
-1.14301	C030030A07Rik	18.4444	3.34784	-21.0823	3.71782	0.658002	C030030A07RIK	Mus musculus RIKEN cDNA C030030A07 gene (C030030A07Rik), mRNA.
1.66216	C030039L03Rik	117.423	3.18154	195.176	100.008	0.493797	C030039L03RIK	Mus musculus RIKEN cDNA C030039L03 gene (C030039L03Rik), mRNA.
0.601587	C030045D06Rik	402.102	42.1723	241.899	154.333	0.374822	C030045D06RIK	Mus musculus RIKEN cDNA C030045D06 gene (C030045D06Rik), mRNA.	D430013K02; AI316880; AI553603
-15.4322	C030046E11Rik	-1.9857	7.7388	30.6438	28.622	0.718894	C030046E11RIK	PREDICTED: Mus musculus RIKEN cDNA C030046E11 gene, transcript variant 2 (C030046E11Rik), mRNA.
1.35806	C030046I01Rik	6.9046	10.9163	9.37686	51.1236	0.979349	C030046I01RIK	Mus musculus RIKEN cDNA C030046I01 gene (C030046I01Rik), mRNA.	AI503502
1.05578	C030048B08Rik	520.912	65.731	549.97	81.5785	0.809515	C030048B08RIK	Mus musculus RIKEN cDNA C030048B08 gene (C030048B08Rik), mRNA.	AW548102
1.34652	C130022K22Rik	1432.15	48.2305	1928.42	175.079	0.046559	C130022K22RIK	Mus musculus RIKEN cDNA C130022K22 gene (C130022K22Rik), mRNA.
0.769533	C130023O10Rik	-45.5566	15.3757	-35.0573	7.83004	0.906015	C130023O10RIK	Mus musculus RIKEN cDNA C130023O10 gene (C130023O10Rik), mRNA.
1.03753	C130026I21Rik	27.9544	32.4316	29.0035	16.1671	0.990929	C130026I21RIK	Mus musculus RIKEN cDNA C130026I21 gene (C130026I21Rik), transcript variant 1, mRNA.	4930565N07Rik
1.11121	C130032J12Rik	1633.74	70.6509	1815.42	729.559	0.730339	C130032J12RIK	Mus musculus RIKEN cDNA C130032J12 gene (C130032J12Rik), mRNA.	9130202B12
1.63532	C130038G02Rik	125.959	53.7385	205.983	14.2142	0.434823	C130038G02RIK	Mus musculus RIKEN cDNA C130038G02 gene (C130038G02Rik), transcript variant 2, mRNA.	mKIAA0774; AU067634; 5730592G18Rik; Gm763; A730013O20Rik
0.712797	C130050O18Rik	-55.1859	15.7888	-39.3364	1.74795	0.858512	C130050O18RIK	Mus musculus RIKEN cDNA C130050O18 gene (C130050O18Rik), mRNA.
0.732884	C130053K05Rik	-78.2473	16.6168	-57.3462	3.7603	0.813875	C130053K05RIK	Mus musculus RIKEN cDNA C130053K05 gene (C130053K05Rik), mRNA.
-0.875279	C130057D23Rik	-8.59325	20.3593	7.52149	26.1806	0.858976	C130057D23RIK	Mus musculus RIKEN cDNA C130057D23 gene (C130057D23Rik), mRNA.
2.83582	C130060K24Rik	173.674	119.96	492.509	238.315	0.125329	C130060K24RIK	Mus musculus RIKEN cDNA C130060K24 gene (C130060K24Rik), mRNA.
1.35613	C130073D16Rik	218.392	14.2394	296.169	248.927	0.693707	C130073D16RIK
-6.71456	C130074G19Rik	1.92375	10.9656	-12.9171	5.0743	0.868076	C130074G19RIK	Mus musculus RIKEN cDNA C130074G19 gene (C130074G19Rik), mRNA.
0.98831	C130079G13Rik	-36.0356	19.9379	-35.6143	4.44208	0.996239	C130079G13RIK	Mus musculus RIKEN cDNA C130079G13 gene (C130079G13Rik), mRNA.
0.486401	C130090K23Rik	141.85	3.57044	68.996	36.0025	0.301901	C130090K23RIK	Mus musculus RIKEN cDNA C130090K23 gene (C130090K23Rik), mRNA.
0.88723	C1d	-10.8023	13.8546	-9.58414	16.4882	0.989122	C1D	Mus musculus nuclear DNA binding protein (C1d), mRNA.	SUN-CoR; 1110036E10Rik; AI875855
1.42661	C1galt1	19.6373	21.2476	28.0147	54.7981	0.931154	C1GALT1	Mus musculus core 1 synthase, glycoprotein-N-acetylgalactosamine 3-beta-galactosyltransferase, 1 (C1galt1), mRNA.	2210410E06Rik; T-synthase; AV284120
0.753139	C1galt1c1	920.044	163.194	692.922	187.705	0.247725	C1GALT1C1	Mus musculus C1GALT1-specific chaperone 1 (C1galt1c1), mRNA.	C81205; 1500002I11Rik; AB030184
0.139559	C1qa	803.644	214.431	112.156	62.1708	0.000128257	C1QA	Mus musculus complement component 1, q subcomponent, alpha polypeptide (C1qa), mRNA.	C1q; AI255395
0.109332	C1qb	1824.38	180.413	199.463	83.5687	1.04979e-22	C1QB	Mus musculus complement component 1, q subcomponent, beta polypeptide (C1qb), mRNA.
1.09502	C1qbp	491.696	24.6117	538.415	253.741	0.816665	C1QBP	Mus musculus complement component 1, q subcomponent binding protein (C1qbp), nuclear gene encoding mitochondrial protein, mRNA.	HABP1; D11Wsu182e; AA407365; P32; gC1qBP; AA986492
0.0849608	C1qc	994.472	238.691	84.4911	30.3736	2.05513e-06	C1QC	Mus musculus complement component 1, q subcomponent, C chain (C1qc), mRNA.	Ciqc; C1qg; AI385742
0.845497	C1ql1	284.298	0.277698	240.373	194.014	0.788927	C1QL1	Mus musculus complement component 1, q subcomponent-like 1 (C1ql1), mRNA.	CRF; gliacolin; C1qrf
6.12598	C1ql2	14.0367	21.8561	85.9886	74.8183	0.486965	C1QL2	Mus musculus complement component 1, q subcomponent-like 2 (C1ql2), mRNA.	BC040774; MGC49730
1.41729	C1ql3	104.894	19.9275	148.666	104.528	0.704931	C1QL3
2.37847	C1ql4	49.1379	0.633641	116.873	86.3415	0.528984	C1QL4	Mus musculus complement component 1, q subcomponent-like 4 (C1ql4), mRNA.	C1qtnf11
0.965476	C1qtnf1	-33.4778	2.1672	-32.322	36.192	0.989963	C1QTNF1	Mus musculus C1q and tumor necrosis factor related protein 1 (C1qtnf1), mRNA.	CTRP1; 1600017K21Rik; Zsig37
1.1357	C1qtnf2	-6.58215	4.02614	-7.47534	14.8888	0.992029	C1QTNF2	Mus musculus C1q and tumor necrosis factor related protein 2 (C1qtnf2), mRNA.	1810033K05Rik; CTRP2; RP23-26M1.6
0.670264	C1qtnf3	79.0861	11.4591	53.0086	29.7426	0.661807	C1QTNF3	Mus musculus C1q and tumor necrosis factor related protein 3 (C1qtnf3), mRNA.	CTRP3; Cors; AI315029; Corcs; CORS-26; 2310005P21Rik
-1.97451	C1qtnf4	-12.5872	1.25795	24.8536	43.7246	0.689077	C1QTNF4	Mus musculus C1q and tumor necrosis factor related protein 4 (C1qtnf4), mRNA.	CTRP4; 0710001E10Rik; 9430004J15Rik
-7.43932	C1qtnf6	1.99307	13.9712	-14.827	4.24721	0.850627	C1QTNF6	Mus musculus C1q and tumor necrosis factor related protein 6 (C1qtnf6), mRNA.	AW743441; 2810036M19Rik; CTRP6
2.09438	C1qtnf7	-26.603	37.8522	-55.7166	6.7555	0.751644	C1QTNF7	Mus musculus C1q and tumor necrosis factor related protein 7 (C1qtnf7), mRNA.	CTRP7; 5530401N20Rik; 8430425G24Rik
-0.195256	C1qtnf9	-12.3471	22.4249	2.41085	19.5961	0.870115	C1QTNF9	Mus musculus C1q and tumor necrosis factor related protein 9 (C1qtnf9), mRNA.	9130217G22Rik; Ciqtnf9
-0.387324	C1r	40.0165	50.365	-15.4994	39.4434	0.573409	C1R	Mus musculus complement component 1, r subcomponent (C1r), mRNA.	C1rb; AI132558
1.01301	C1rl	135.893	35.4759	137.661	63.4639	0.983332	C1RL	Mus musculus complement component 1, r subcomponent-like (C1rl), mRNA.	C1rlp; C1r-LP; C1rl1
0.311076	C1s	44.873	20.3974	13.9589	26.9036	0.74327	C1S	Mus musculus complement component 1, s subcomponent (C1s), transcript variant 1, mRNA.	MGC132830; C1sa; AI255193; MGC37773; AA959438; AI327365
-1.94393	C2	8.54388	15.4601	-16.6087	13.665	0.778243	C2	Mus musculus complement component 2 (within H-2S) (C2), mRNA.
0.254328	C230021P08Rik	-48.4636	7.44666	-12.3256	10.6268	0.685445	C230021P08RIK	Mus musculus Riken cDNA C230021P08 gene (C230021P08Rik), mRNA.
0.442499	C230029F24Rik	-40.0526	18.5894	-17.7232	6.23194	0.802941	C230029F24RIK	Mus musculus RIKEN cDNA C230029F24 gene (C230029F24Rik), mRNA.
2.59745	C230052I12Rik	22.8063	7.54846	59.2381	42.2691	0.706282	C230052I12RIK	Mus musculus RIKEN cDNA C230052I12 gene (C230052I12Rik), mRNA.	AW538696; AW124591
-0.127676	C230055K05Rik	-19.846	15.4718	2.53385	39.2809	0.808942	C230055K05RIK	Mus musculus RIKEN cDNA C230055K05 gene (C230055K05Rik), mRNA.
0.880131	C230071H18Rik	220.803	77.3987	194.335	144.202	0.85531	C230071H18RIK	Mus musculus RIKEN cDNA C230071H18 gene (C230071H18Rik), mRNA.
0.523065	C230078M08Rik	-24.2283	30.2449	-12.673	47.1649	0.904344	C230078M08RIK	Mus musculus RIKEN cDNA C230078M08 gene (C230078M08Rik), mRNA.
1.65637	C230078M14Rik	116.504	19.8974	192.973	78.8388	0.466288	C230078M14RIK	Mus musculus RIKEN cDNA C230078M14Rik gene (C230078M14Rik), mRNA.	Caspr5-2
1.62994	C230090D14	-17.3465	31.2248	-28.2738	0.167015	0.904493	C230090D14
1.79129	C230094A16Rik	24.5631	10.8959	43.9998	24.6067	0.83008	C230094A16RIK	Mus musculus RIKEN cDNA C230094A16 gene (C230094A16Rik), mRNA.	MGC38936; RP23-176O5.5; 2900083P10Rik
0.699427	C230095G01Rik	162.735	9.78301	113.821	70.0956	0.631705	C230095G01RIK	Mus musculus RIKEN cDNA C230095G01 gene (C230095G01Rik), mRNA.
1.31045	C230096C10Rik	493.4	5.20793	646.577	123.479	0.414065	C230096C10RIK	Mus musculus RIKEN cDNA C230096C10 gene (C230096C10Rik), transcript variant 1, mRNA.	mKIAA0090; RP23-371E13.1; 2700016F22Rik
4.57217	C2cd3	30.203	8.46301	138.093	19.4085	0.247792	C2CD3	Mus musculus C2 calcium-dependent domain containing 3 (C2cd3), mRNA. XM_898162 XM_898171 XM_898180 XM_898190 XM_898198 XM_898211 XM_898219 XM_906365 XM_919792 XM_919798 XM_919811 XM_919824 XM_919836 XM_919846 XM_919852 XM_919861 XM_919867 XM_919873 XM_919879 XM_919890 XM_919906
0.415853	C3	219.147	33.496	91.1326	40.953	0.179025	C3
4.98744	C330001K17Rik	33.5545	21.883	167.351	46.5774	0.15844	C330001K17RIK	Mus musculus RIKEN cDNA C330001K17 gene (C330001K17Rik), mRNA.	AI644415
1.14888	C330005M16Rik	95.4179	22.5305	109.624	37.2917	0.878496	C330005M16RIK	Mus musculus RIKEN cDNA C330005M16 gene (C330005M16Rik), mRNA.	AU017076
4.37621	C330011K17Rik	11.1903	14.0474	48.971	13.4237	0.676786	C330011K17RIK	Mus musculus RIKEN cDNA C330011K17 gene (C330011K17Rik), mRNA.	Rslcan15; MGC91167
1.67473	C330016O10Rik	31.3858	18.9683	52.5627	38.5999	0.819377	C330016O10RIK
1.21176	C330019G07Rik	191.356	4.83124	231.878	46.5245	0.678991	C330019G07RIK	Mus musculus RIKEN cDNA C330019G07 gene (C330019G07Rik), mRNA.
1.21453	C330019L16Rik	108.287	8.44404	131.518	87.8827	0.830395	C330019L16RIK	Mus musculus RIKEN cDNA C330019L16 gene (C330019L16Rik), mRNA. XM_924349
0.616801	C330021F23Rik	4916.92	72.6113	3032.76	331.873	1.95795e-06	C330021F23RIK	Mus musculus RIKEN cDNA C330021F23 gene (C330021F23Rik), mRNA.	2610027C06Rik
2.45123	C330023M02Rik	151.898	48.1197	372.338	64.1495	0.0433484	C330023M02RIK	Mus musculus RIKEN cDNA C330023M02 gene (C330023M02Rik), mRNA.	A630046C11; AI450868; 4833422K13Rik
0.660919	C330027C09Rik	-54.8133	4.16254	-36.2272	18.4957	0.830192	C330027C09RIK	Mus musculus RIKEN cDNA C330027C09 gene (C330027C09Rik), mRNA.	AU018569; AA408511
0.485897	C330043M08Rik	-62.9044	4.72451	-30.565	8.58207	0.715839	C330043M08RIK	Mus musculus RIKEN cDNA C330043M08 gene (C330043M08Rik), mRNA.
0.661514	C330046G03Rik	-67.1387	7.23835	-44.4132	27.8722	0.80129	C330046G03RIK	Mus musculus RIKEN cDNA C330046G03 gene (C330046G03Rik), mRNA.	Tnep1; ORF65
0.166181	C3ar1	779.263	528.33	129.498	13.1162	0.0912977	C3AR1	Mus musculus complement component 3a receptor 1 (C3ar1), mRNA.	HNFAG09; C3AR; AZ3B
1.21519	C430003P19Rik	845.751	30.5832	1027.75	87.5784	0.253396	C430003P19RIK	Mus musculus RIKEN cDNA C430003P19 gene (C430003P19Rik), mRNA.	AI853413; AA589499
0.937913	C430004E15Rik	754.528	162.641	707.682	271.743	0.845539	C430004E15RIK	Mus musculus RIKEN cDNA C430004E15 gene (C430004E15Rik), mRNA.	MGC107193; C87750
1.05388	C430048L16Rik	2088.78	171.494	2201.33	972.398	0.872926	C430048L16RIK	Mus musculus RIKEN cDNA C430048L16 gene (C430048L16Rik), mRNA.	RP23-203A12.6; AV299215; MGC91091
0.535389	C4a	-51.0146	15.4117	-27.3126	1.20669	0.790081	C4A	Mus musculus complement component 4A (Rodgers blood group) (C4a), mRNA.	Slp
0.74939	C4b	1749.85	489.849	1311.32	583.851	0.421858	C4B	Mus musculus complement component 4B (Childo blood group) (C4b), mRNA. XM_921663 XM_921673 XM_921676 XM_921678	Ss; C4
0.556496	C4bp	-70.3298	1.25662	-39.1383	12.8796	0.725097	C4BP	Mus musculus complement component 4 binding protein (C4bp), mRNA.	AI195242
0.96555	C530008M07Rik	-59.3173	2.89856	-57.2738	34.0737	0.982159	C530008M07RIK	Mus musculus RIKEN cDNA C530008M07 gene (C530008M07Rik), mRNA.	Gm516
0.951484	C530028I08Rik	51.5692	3.42348	49.0673	27.8309	0.994302	C530028I08RIK	Mus musculus RIKEN cDNA C530028I08 gene (C530028I08Rik), mRNA.	Gm159
2.09726	C530028O21Rik	118.409	6.16968	248.335	237.583	0.494294	C530028O21RIK	Mus musculus RIKEN cDNA C530028O21 gene (C530028O21Rik), mRNA.	AU067746; AI255183
0.590252	C530044N13Rik	559.115	107.51	330.019	121.808	0.11281	C530044N13RIK	Mus musculus RIKEN cDNA C530044N13 gene (C530044N13Rik), mRNA.	MGC27760
6.99213	C5ar1	-5.56867	49.6442	-38.9368	21.3606	0.727016	C5AR1	Mus musculus complement component 5a receptor 1 (C5ar1), mRNA.	Cd88; C5aR; D7Msu1; C5r1
0.952409	C6	23.7368	1.88143	22.6071	1.75968	0.989924	C6	Mus musculus complement component 6 (C6), mRNA.	AW111623
1.42369	C630004H02Rik	339.518	42.1677	483.367	123.931	0.318148	C630004H02RIK	Mus musculus RIKEN cDNA C630004H02 gene (C630004H02Rik), mRNA.
-0.173049	C630007B19Rik	-21.7357	10.6918	3.76134	20.7542	0.775832	C630007B19RIK	Mus musculus RIKEN cDNA C630007B19 gene (C630007B19Rik), mRNA.	TAFA1; Tafa-1; FAM19A1 TAFA-1
0.596517	C630011I23	320.693	110.87	191.299	3.7041	0.292099	C630011I23
1.14704	C630028N24Rik	3185.91	22.3489	3654.37	2053.69	0.748179	C630028N24RIK	Mus musculus RIKEN cDNA C630028N24 gene (C630028N24Rik), mRNA.
1.22351	C630035N08Rik	149.839	35.5368	183.329	47.5069	0.731264	C630035N08RIK	Mus musculus RIKEN cDNA C630035N08 gene (C630035N08Rik), mRNA.
0.741874	C730025P13Rik	282.172	85.7705	209.336	185.388	0.666359	C730025P13RIK	Mus musculus RIKEN cDNA C730025P13 gene (C730025P13Rik), mRNA.	RP23-132N23.14
-2.13429	C730027P07Rik	-10.6933	13.207	22.8226	5.32977	0.709461	C730027P07RIK	Mus musculus RIKEN cDNA C730027P07 gene (C730027P07Rik), mRNA.	MGC130602
0.239457	C730034F03Rik	-40.7858	6.7257	-9.76646	17.051	0.728123	C730034F03RIK	Mus musculus RIKEN cDNA C730034F03 gene (C730034F03Rik), mRNA.
0.837802	C77080	-40.264	20.6297	-33.7333	3.51122	0.941814	C77080	Mus musculus expressed sequence C77080 (C77080), mRNA.	mKIAA1522
1.16387	C78339	811.673	135.786	944.68	345.193	0.63054	C78339	Mus musculus expressed sequence C78339 (C78339), mRNA.
1.36726	C78409	29.2834	6.20777	40.0379	7.58198	0.905408	C78409	Mus musculus expressed sequence C78409 (C78409), mRNA.	MGC107595; D630010I07
0.518042	C79127	381.657	164.856	197.714	21.8832	0.22089	C79127	Mus musculus expressed sequence C79127 (C79127), mRNA.	A930002H20
4.21653	C79267	17.1702	6.47826	72.3988	28.365	0.545052	C79267	Mus musculus expressed sequence C79267 (C79267), mRNA.	MGC36549
1.61073	C79407	18.5453	29.5704	29.8714	11.7585	0.903305	C79407	Mus musculus expressed sequence C79407 (C79407), mRNA.	6720403H11; KIAA1903; mKIAA1903
0.478375	C80008	-78.4413	5.78494	-37.5243	7.46758	0.644561	C80008	Mus musculus expressed sequence C80008 (C80008), mRNA.
0.767375	C80913	375.029	45.0132	287.788	4.56326	0.401579	C80913	Mus musculus expressed sequence C80913 (C80913), mRNA.	NNX3; Rmp
1.76484	C85492	598.125	56.6118	1055.6	631.838	0.279749	C85492	Mus musculus expressed sequence C85492 (C85492), mRNA.	Ago61; MGC31712
0.59637	C85627	-68.1905	4.99056	-40.6668	4.50942	0.756298	C85627	Mus musculus expressed sequence C85627 (C85627), mRNA.
1.79951	C87436	52.2838	8.07667	94.0854	18.4026	0.650551	C87436	Mus musculus expressed sequence C87436 (C87436), mRNA.	MGC25529
0.634071	C87499	-91.3626	8.4572	-57.9304	10.2185	0.705341	C87499	Mus musculus expressed sequence C87499 (C87499), mRNA.	MGC60825
0.388873	C8a	90.0124	0.00922972	35.0034	6.32858	0.544074	C8A	Mus musculus complement component 8, alpha polypeptide (C8a), mRNA.	MGC29381
1.0568	C8b	116.881	16.7632	123.52	58.1938	0.945985	C8B	Mus musculus complement component 8, beta polypeptide (C8b), mRNA.	4930439B20Rik; AI595927
0.686254	C8g	157.775	82.9086	108.274	20.266	0.648757	C8G	Mus musculus complement component 8, gamma polypeptide (C8g), mRNA.	RP23-47P18.13; 1700013L23Rik
-1.19312	C9	4.13687	15.3247	-4.93578	5.27395	0.918777	C9	Mus musculus complement component 9 (C9), mRNA.
1.68791	C920005C14Rik	33.601	9.83261	56.7155	3.22048	0.799319	C920005C14RIK	Mus musculus RIKEN cDNA C920005C14 gene (C920005C14Rik), mRNA.
1.04636	C920016K16Rik	103.359	13.4452	108.151	15.1789	0.958777	C920016K16RIK	Mus musculus RIKEN cDNA C920016K16 gene (C920016K16Rik), mRNA.	BC057593; MGC67168
0.913174	Cab39	205.053	95.1861	187.249	72.7181	0.883841	CAB39	Mus musculus calcium binding protein 39 (Cab39), mRNA.	AA960512; C78372; AA408805; 39kDa; MO25
0.808914	Cab39l	837.824	53.8834	677.728	13.1626	0.22023	CAB39L	Mus musculus calcium binding protein 39-like (Cab39l), mRNA.	4930520C08Rik; MO2L; 1500031K13Rik; AA589432; 2810425O13Rik
2.13422	Cabc1	26.368	7.60489	56.2752	85.3166	0.780048	CABC1	Mus musculus chaperone, ABC1 activity of bc1 complex like (S. pombe) (Cabc1), nuclear gene encoding mitochondrial protein, mRNA.	AI462003; 4632432J16Rik; mKIAA0451
0.718944	Cables2	207.005	15.8078	148.825	64.8023	0.562758	CABLES2	Mus musculus CDK5 and Abl enzyme substrate 2 (Cables2), mRNA.	ik3-2
0.74493	Cabp1	138.966	18.0384	103.52	55.4515	0.715667	CABP1	Mus musculus calcium binding protein 1 (Cabp1), mRNA.
0.675314	Cabp2	80.2489	3.92687	54.1932	45.7282	0.782653	CABP2	Mus musculus calcium binding protein 2 (Cabp2), mRNA.	MGC129493
0.618916	Cabp4	71.4252	26.6395	44.2062	23.9099	0.732697	CABP4	Mus musculus calcium binding protein 4 (Cabp4), mRNA.	2410038D05Rik
0.50277	Cabp7	135.596	77.0004	68.1737	16.7464	0.522675	CABP7	Mus musculus calcium binding protein 7 (Cabp7), mRNA.	MGC129429; MGC129428
0.934944	Cabyr	506.341	4.68933	473.4	132.404	0.426373	CABYR	Mus musculus calcium-binding tyrosine-(Y)-phosphorylation regulated (fibrousheathin 2) (Cabyr), transcript variant 5, mRNA.	1700016C01Rik; FSP-2; 4933421A18Rik; MGC130218; CBP86; MGC130217
1.47688	Cachd1	58.2116	8.81305	85.9715	21.9729	0.763173	CACHD1	Mus musculus cache domain containing 1 (Cachd1), mRNA.	mKIAA1573; B430218L07Rik; Vwcd1; RP23-29O24.1; AI852726; 1190007F10Rik
1.78758	Cacna1a	309.74	26.6137	553.686	479.457	0.486831	CACNA1A
3.0653	Cacna1b	86.33	41.5346	264.627	32.3228	0.142141	CACNA1B	Mus musculus calcium channel, voltage-dependent, N type, alpha 1B subunit (Cacna1b), transcript variant 1, mRNA.	AW060892; alpha(1B); AW822256; Cav2.2; Cchn1a; AW050276
2.65627	Cacna1c	55.9595	12.3519	148.644	85.5139	0.432348	CACNA1C
-0.748814	Cacna1d	-34.3614	17.4613	25.7303	1.56394	0.504796	CACNA1D	Mus musculus calcium channel, voltage-dependent, L type, alpha 1D subunit (Cacna1d), transcript variant 2, mRNA.	Cacnl1a2; Cchl1a; D-LTCC; C79217; 8430418G19Rik; Cchl1a2
2.08299	Cacna1f	44.6834	4.97	93.0751	131.276	0.81293	CACNA1F
1.63168	Cacna1g	180.613	113.235	294.704	41.6173	0.392059	CACNA1G	Mus musculus calcium channel, voltage-dependent, T type, alpha 1G subunit (Cacna1g), mRNA.	[a]1G; mKIAA1123; Cav3.1d; a1G; alpha-1G
2.98715	Cacna1h	82.4737	58.4638	246.362	141.454	0.239209	CACNA1H	Mus musculus calcium channel, voltage-dependent, T type, alpha 1H subunit (Cacna1h), mRNA.	alpha13.2; MNCb-1209; Cav3.2
2.12104	Cacna2d1	1310.92	171.06	2780.51	198.956	3.1509e-05	CACNA2D1	Mus musculus calcium channel, voltage-dependent, alpha2/delta subunit 1 (Cacna2d1), mRNA.	MGC141430; Cchl2a; Cacna2
1.1759	Cacna2d3	844.233	92.6172	992.731	84.5541	0.368188	CACNA2D3	Mus musculus calcium channel, voltage-dependent, alpha2/delta subunit 3 (Cacna2d3), mRNA.	Cacnad3
0.765249	Cacnb1	100.214	60.2063	76.6889	2.41043	0.843887	CACNB1	Mus musculus calcium channel, voltage-dependent, beta 1 subunit (Cacnb1), transcript variant variant 2, mRNA.	Cchlb1; Cchb1
1.26826	Cacnb2	345.077	23.5918	437.647	35.8654	0.451139	CACNB2	Mus musculus calcium channel, voltage-dependent, beta 2 subunit (Cacnb2), mRNA.	MGC129334; AW060387; Cchb2; MGC129335
2.33504	Cacnb3	42.7231	28.3714	99.7599	53.4295	0.612307	CACNB3	Mus musculus calcium channel, voltage-dependent, beta 3 subunit (Cacnb3), transcript variant 1, mRNA.	Cchb3; Beta3
0.852058	Cacnb4	1029.83	184.097	877.476	293.875	0.594767	CACNB4	Mus musculus calcium channel, voltage-dependent, beta 4 subunit (Cacnb4), transcript variant 1, mRNA.	lh; lethargic; Cchb4; 3110038O15Rik; MGC31529
0.170611	Cacng1	-48.9918	7.69568	-8.35852	3.78442	0.648824	CACNG1	Mus musculus calcium channel, voltage-dependent, gamma subunit 1 (Cacng1), mRNA.	MGC117703
0.925744	Cacng2	309.154	18.1104	286.197	12.2896	0.820595	CACNG2	Mus musculus calcium channel, voltage-dependent, gamma subunit 2 (Cacng2), mRNA.	stg; B930041E13Rik; B230105C07Rik; AW060990; stargazer; MGC123981; stargazin; wag; waggler
0.994521	Cacng3	225.032	122.771	223.8	48.0893	0.992386	CACNG3	Mus musculus calcium channel, voltage-dependent, gamma subunit 3 (Cacng3), mRNA.
1.13473	Cacng4	102.292	48.189	116.074	8.80444	0.888028	CACNG4
1.10743	Cacng5	175.434	11.3887	194.28	67.6218	0.8499	CACNG5	Mus musculus calcium channel, voltage-dependent, gamma subunit 5 (Cacng5), mRNA.
0.899454	Cacng6	-39.9786	17.3229	-35.9589	3.54629	0.964014	CACNG6	Mus musculus calcium channel, voltage-dependent, gamma subunit 6 (Cacng6), mRNA.	MGC144252; AW050150; MGC144251; 2310033H20Rik
1.03056	Cacng7	345.085	85.0841	355.632	69.6669	0.929392	CACNG7	Mus musculus calcium channel, voltage-dependent, gamma subunit 7 (Cacng7), mRNA.
1.90639	Cacng8	71.7077	2.26867	136.703	78.4074	0.53437	CACNG8	Mus musculus calcium channel, voltage-dependent, gamma subunit 8 (Cacng8), mRNA.
1.13304	Cacybp	1127.95	97.557	1278.01	352.254	0.582409	CACYBP	Mus musculus calcyclin binding protein (Cacybp), mRNA.
2.55864	Cad	22.2299	36.2236	56.8783	20.8195	0.711291	CAD	Mus musculus carbamoyl-phosphate synthetase 2, aspartate transcarbamylase, and dihydroorotase (Cad), mRNA.	Cpad; 2410008J01Rik; AU018859
0.998213	Cadm2	570.607	64.3729	569.588	51.7157	0.993505	CADM2	Mus musculus cell adhesion molecule 2 (Cadm2), mRNA.	Igdf4d; SynCAM2; NECL3; 9330131D06; Igsf4d; A830029E02Rik
1.06085	Cadm3	3735.46	242.446	3962.78	1274.98	0.805232	CADM3	Mus musculus cell adhesion molecule 3 (Cadm3), mRNA.	SynCAM3; Necl1; Igsf4b; Necl-1; Tsll1; BIgR
1.37608	Cadps	1441.23	46.933	1983.25	210.205	0.0334627	CADPS	Mus musculus Ca2+-dependent secretion activator (Cadps), transcript variant 2, mRNA.	mKIAA1121; AU067781; CAPS; CAPS1; MGC90712
0.93607	Cadps2	1649.13	273.028	1543.71	633.258	0.772387	CADPS2	Mus musculus Ca2+-dependent activator protein for secretion 2 (Cadps2), mRNA.	Cpd2; Caps2; A230044C21Rik
0.553972	Cage1	-36.7307	9.91991	-20.3478	9.95867	0.854081	CAGE1	Mus musculus cancer antigen 1 (Cage1), mRNA.	4933427I01Rik; Ctag3; MGC100323
-0.134272	Calb1	18.7761	39.6993	-2.5211	13.7626	0.819051	CALB1	Mus musculus calbindin 1 (Calb1), mRNA.	CB; Calb-1; Brain-2; Calb
1.80207	Calb2	2478.42	182.623	4466.28	1370.36	0.0541049	CALB2	Mus musculus calbindin 2 (Calb2), mRNA.	CR
9.67064	Calca	87.3764	11.1618	844.986	40.7653	6.7287e-06	CALCA
1.0795	Calcb	47.5413	8.29381	51.3208	20.589	0.966816	CALCB	Mus musculus calcitonin-related polypeptide, beta (Calcb), mRNA.	CGRP2; MGC130530; Calc2
1.20017	Calcoco1	574.941	93.257	690.026	66.533	0.532196	CALCOCO1	Mus musculus calcium binding and coiled coil domain 1 (Calcoco1), mRNA.	mKIAA1536; KIAA1536; Cocoa; 1810009B06Rik
0.051839	Calcr	-24.8702	11.5138	-1.28925	53.8018	0.815643	CALCR
-0.625175	Calcrl	34.9483	3.98417	-21.8488	1.93404	0.525003	CALCRL	Mus musculus calcitonin receptor-like (Calcrl), mRNA.	CRLR; AV071593
0.483593	Cald1	303.248	32.4626	146.649	73.7496	0.113796	CALD1	Mus musculus caldesmon 1 (Cald1), mRNA.	C920027I18Rik; AV071549; MGC30319; 4833423D12Rik; AI195384; AW536160
0.906729	Calm1	3272.79	113.213	2967.54	83.6088	0.409545	CALM1	Mus musculus calmodulin 1 (Calm1), mRNA.	AI461935; CaM; Calm; AL024000; AI327027; AI256814
0.832868	Calm2	4668.34	430.389	3888.11	344.068	0.151045	CALM2	Mus musculus calmodulin 2 (Calm2), mRNA.	AL024017; 1500001E21Rik
0.980577	Calm3	9540.68	252.721	9355.37	1219.53	0.865286	CALM3	Mus musculus calmodulin 3 (Calm3), mRNA.	R75142; CaMA
0.551588	Calm4	-60.7206	26.209	-33.4928	16.1394	0.762949	CALM4	Mus musculus calmodulin 4 (Calm4), mRNA.	AI649108; Scarf; DD112; 2310037J09Rik
-2.29065	Calm5	-16.8592	17.0158	38.6184	33.7648	0.544749	CALM5	Mus musculus calmodulin 5 (Calm5), mRNA.	Scarf2; AY314008
0.54132	Calml3	212.75	15.5482	115.166	25.1673	0.296879	CALML3	Mus musculus calmodulin-like 3 (Calml3), mRNA.	AI326174; 2310068O22Rik
0.730752	Calml4	294.798	40.7332	215.424	47.0536	0.426507	CALML4
1.31415	Caln1	1380.52	249.438	1814.22	53.7597	0.135687	CALN1	Mus musculus calneuron 1 (Caln1), mRNA.	MNCb-0849; Cabp8; 9630012C17Rik
0.803144	Calr	3084.72	260.589	2477.47	756.938	0.289087	CALR	Mus musculus calreticulin (Calr), mRNA.	Calregulin; CRT
1.53092	Calr3	7.60975	15.8393	11.6499	8.01124	0.958755	CALR3	Mus musculus calreticulin 3 (Calr3), transcript variant 2, mRNA.	6330586I20Rik; Crt2; 1700031L01Rik
1.44505	Calr4	201.096	65.3624	290.595	253.902	0.662492	CALR4	Mus musculus calreticulin 4 (Calr4), mRNA.	AU017583; 4933403L16Rik
0.709325	Calu	427.798	13.5453	303.448	75.6047	0.258954	CALU	Mus musculus calumenin (Calu), transcript variant 2, mRNA.	9530075H20Rik
3.06986	Caly	128.668	23.6279	394.991	352.65	0.314592	CALY	Mus musculus calcyon neuron-specific vesicular protein (Caly), mRNA.	1110004A22Rik; 0710001P07Rik; Calcyon
1.38941	Camk1	513.436	76.8209	713.374	412.114	0.517741	CAMK1	Mus musculus calcium/calmodulin-dependent protein kinase I (Camk1), mRNA.	AI505105; CaMKIalpha; D6Ertd263e
1.45419	Camk1d	39.6396	12.9252	57.6437	16.7122	0.844695	CAMK1D	Mus musculus calcium/calmodulin-dependent protein kinase ID (Camk1d), mRNA.	A630059D12Rik; E030025C11Rik; CKLiK; CaMKIdelta
2.79946	Camk1g	53.5879	25.2701	150.017	150.077	0.504486	CAMK1G	Mus musculus calcium/calmodulin-dependent protein kinase I gamma (Camk1g), mRNA.	CaMKIgamma; CLICK-III; MGC30513
1.05254	Camk2a	350.982	242.662	369.422	200.15	0.937764	CAMK2A	Mus musculus calcium/calmodulin-dependent protein kinase II alpha (Camk2a), transcript variant 1, mRNA.	R74975; CaMKII; mKIAA0968
1.38235	Camk2b	2239.01	4.71954	3095.11	577.244	0.044284	CAMK2B	Mus musculus calcium/calmodulin-dependent protein kinase II, beta (Camk2b), mRNA.	MGC90738; Camk2d
1.21037	Camk2d	347.804	44.8288	420.972	12.6844	0.374266	CAMK2D	Mus musculus calcium/calmodulin-dependent protein kinase II, delta (Camk2d), transcript variant 1, mRNA.	8030469K03Rik; 2810011D23Rik; MGC60852; mKIAA4163; KIAA4163; [d]-CaMKII
1.12515	Camk2g	1185.36	19.3983	1333.71	63.7701	0.419003	CAMK2G	Mus musculus calcium/calmodulin-dependent protein kinase II gamma (Camk2g), transcript variant 1, mRNA. XM_896390 XM_896399 XM_896412 XM_896420 XM_896426 XM_896437 XM_896445 XM_896451 XM_896460 XM_896470 XM_896481 XM_896491 XM_896501 XM_896509 XM_896518 XM_896526 XM_896534 XM_896546 XM_907307	5930429P18Rik; Camkg
0.919306	Camk2n1	5524.59	922.839	5078.79	505.017	0.609345	CAMK2N1	Mus musculus calcium/calmodulin-dependent protein kinase II inhibitor 1 (Camk2n1), mRNA.	1810006K23Rik
0.800443	Camk4	1225.5	232.986	980.942	621.72	0.608599	CAMK4	Mus musculus calcium/calmodulin-dependent protein kinase IV (Camk4), mRNA.	D18Bwg0362e; A430110E23Rik; CaMKIV/Gr; CaMKIV; AI666733
1.55116	Camkk1	143.349	11.7982	222.358	92.7302	0.475063	CAMKK1	Mus musculus calcium/calmodulin-dependent protein kinase kinase 1, alpha (Camkk1), mRNA.	AI846603; Camkk; CaMKKalpha
1.00748	Camkk2	207.468	28.5448	209.02	6.62674	0.924941	CAMKK2	Mus musculus calcium/calmodulin-dependent protein kinase kinase 2, beta (Camkk2), mRNA.	6330570N16Rik; mKIAA0787; AW061083
1.78905	Camkv	196.843	135.072	352.162	204.64	0.423976	CAMKV	Mus musculus CaM kinase-like vesicle-associated (Camkv), mRNA.	BC017634; MGC118008; MGC28873; BB074618; 1G5
0.892329	Caml	232.968	2.81855	207.884	8.57748	0.796195	CAML	Mus musculus calcium modulating ligand (Caml), mRNA.	AI385748; Camlg
0.413357	Camp	247.971	59.9843	102.501	22.9835	0.148557	CAMP	Mus musculus cathelicidin antimicrobial peptide (Camp), mRNA.	MCLP; FALL39; CAP18; Cnlp; Cramp
1.55687	Camsap1l1	969.102	147.258	1508.77	149.694	0.0168678	CAMSAP1L1	Mus musculus calmodulin regulated spectrin-associated protein 1-like 1 (Camsap1l1), mRNA.	4930541M15Rik; mKIAA1078; 1600013L13Rik
1.4653	Camta2	2026.66	66.0618	2969.66	295.042	0.00879312	CAMTA2	Mus musculus calmodulin binding transcription activator 2 (Camta2), mRNA.	mKIAA0909; RP23-326P7.7; Kiaa0909-hp
0.718496	Cand2	71.3835	25.0083	51.2888	12.5998	0.826402	CAND2	Mus musculus cullin-associated and neddylation-dissociated 2 (putative) (Cand2), mRNA.	2210404G23Rik; Tp120b; mKIAA0667
1.19306	Cant1	464.584	105.953	554.278	84.2351	0.901435	CANT1	Mus musculus calcium activated nucleotidase 1 (Cant1), transcript variant 2, mRNA.	Entpd8; D11Bwg0554e; SCAN-1; Shapy; 5830420C20Rik; Apy1h
0.851533	Canx	487.714	50.7016	415.304	155.185	0.617326	CANX	Mus musculus calnexin (Canx), mRNA.	D11Ertd153e; 1110069N15Rik; CNX; AI988026
0.833411	Cap1	482.473	93.9063	402.098	229.162	0.681463	CAP1	Mus musculus CAP, adenylate cyclase-associated protein 1 (yeast) (Cap1), mRNA.
1.21184	Cap2	273.092	23.6895	330.943	90.4303	0.600086	CAP2	Mus musculus CAP, adenylate cyclase-associated protein, 2 (yeast) (Cap2), mRNA.	2810452G09Rik; AV045235
0.250698	Capg	217.804	166.029	54.6033	20.1292	0.297858	CAPG	Mus musculus capping protein (actin filament), gelsolin-like (Capg), transcript variant 1, mRNA.	mbh1; gCap39
0.758064	Capn1	647.688	14.6703	490.989	74.0247	0.175825	CAPN1	Mus musculus calpain 1 (Capn1), mRNA.	mu-calpin; Capa-1; Capa1
0.935269	Capn10	253.29	149.369	236.894	65.8122	0.909912	CAPN10
1.21704	Capn11	-34.5268	4.56675	-42.0206	28.6824	0.934033	CAPN11	Mus musculus calpain 11 (Capn11), mRNA.	protease
0.62056	Capn12	234.139	0.809908	145.297	30.8539	0.348156	CAPN12	Mus musculus calpain 12 (Capn12), mRNA.
0.990521	Capn13	-50.3821	10.785	-49.9045	15.2576	0.99571	CAPN13	Mus musculus calpain 13 (Capn13), mRNA.	Gm943
0.839449	Capn2	809.068	100.35	679.172	0.471284	0.37737	CAPN2	Mus musculus calpain 2 (Capn2), mRNA.	m-calpin; m-calpain; AI326419; Capa2; Capa-2
-2.70149	Capn3	0.866301	5.44813	-2.3403	26.9723	0.965432	CAPN3	Mus musculus calpain 3 (Capn3), mRNA.	Capa3; p94; Lp82; AI323605; Capa-3
1.14129	Capn5	536.484	113.58	612.287	253.265	0.724333	CAPN5	Mus musculus calpain 5 (Capn5), mRNA.
0.802133	Capn6	-38.3155	19.9485	-30.7342	10.387	0.932447	CAPN6	Mus musculus calpain 6 (Capn6), mRNA.
1.23153	Capn7	471.613	99.3849	580.804	102.048	0.425182	CAPN7	Mus musculus calpain 7 (Capn7), mRNA.	PalBH; AU022319
1.37125	Capn8	23.4931	7.42724	32.2151	14.8059	0.883428	CAPN8	Mus musculus calpain 8 (Capn8), mRNA.	nCL-2; nCL-2'; MGC159211; MGC159207
0.852656	Capns1	1247.83	132.041	1063.97	137.969	0.316237	CAPNS1
1.10027	Caprin1	824.053	39.7353	906.68	402.833	0.795119	CAPRIN1	Mus musculus cell cycle associated protein 1 (Caprin1), mRNA.	Gpiap1; MMGPIP137; AL022980; P137; caprin-1; Gpiap
0.517081	Caps2	-60.2476	4.01996	-31.1529	5.28459	0.736984	CAPS2	Mus musculus calcyphosphine 2 (Caps2), mRNA.	D630005B03Rik
0.258447	Capsl	80.5322	2.15767	20.8133	11.7737	0.508508	CAPSL	Mus musculus calcyphosine-like (Capsl), mRNA.	1700028N11Rik; AW125205; MGC74120
0.741257	Capza1	953.332	145.792	706.664	221.775	0.23366	CAPZA1	Mus musculus capping protein (actin filament) muscle Z-line, alpha 1 (Capza1), mRNA.	Cappa1; CAPZ; CAZ1
0.64948	Capza2	676.638	41.9194	439.463	139.052	0.120764	CAPZA2	Mus musculus capping protein (actin filament) muscle Z-line, alpha 2 (Capza2), mRNA.	1110053K06Rik; AW208808; Cappa2
0.56079	Capza3	-78.415	6.40767	-43.9743	4.84303	0.697525	CAPZA3	Mus musculus capping protein (actin filament) muscle Z-line, alpha 3 (Capza3), mRNA.	Cappa3; Tex8; Gsg3
0.861843	Capzb	783.486	16.3312	675.243	362.524	0.216325	CAPZB	Mus musculus capping protein (actin filament) muscle Z-line, beta (Capzb), transcript variant 1, mRNA.	Cappb1; AI325129; 1700120C01Rik; CPbeat2; CPB2; CPbeta2; CPbeta1; CPB1
1.47177	Car11	417.616	98.9512	614.634	44.5072	0.156152	CAR11	Mus musculus carbonic anhydrase 11 (Car11), mRNA.
3.21106	Car12	12.7506	9.11212	40.9429	56.8664	0.771647	CAR12	Mus musculus carbonic anyhydrase 12 (Car12), mRNA.	AI314958; 2310047E01Rik
0.464396	Car13	79.788	9.67625	37.0532	76.5634	0.681	CAR13	Mus musculus carbonic anhydrase 13 (Car13), mRNA.	2310075C21Rik
0.589165	Car14	300.903	111.221	177.282	156.725	0.444522	CAR14	Mus musculus carbonic anhydrase 14 (Car14), mRNA.	AW536446
1.05507	Car15	84.9788	30.1954	89.6589	107.732	0.968375	CAR15	Mus musculus carbonic anhydrase 15 (Car15), mRNA.	Cals2; AI315043
0.418147	Car2	1835.7	322.952	767.591	644	0.00232535	CAR2	Mus musculus carbonic anhydrase 2 (Car2), mRNA.	Lvtw-5; CAII; AI131712; Car-2; Ltw-5
0.62534	Car3	-89.4009	0.0906748	-55.9059	15.4258	0.705771	CAR3	Mus musculus carbonic anhydrase 3 (Car3), mRNA.	Car-3; BB219044
0.694924	Car4	517.142	224.185	359.374	370.641	0.620443	CAR4	Mus musculus carbonic anhydrase 4 (Car4), mRNA.	AW456718
0.225678	Car5b	58.7712	1.90618	13.2634	5.36586	0.597884	CAR5B	Mus musculus carbonic anhydrase 5b, mitochondrial (Car5b), nuclear gene encoding mitochondrial protein, mRNA.	CAVB; 7330410H16Rik; D730005F19Rik; CarVb
0.720526	Car6	-79.2752	1.44685	-57.1198	3.03819	0.802243	CAR6	Mus musculus carbonic anhydrase 6 (Car6), mRNA.	DOC1
0.439734	Car7	46.2887	10.7885	20.3547	0.958198	0.773596	CAR7	Mus musculus carbonic anhydrase 7 (Car7), mRNA.	AV343731
0.912977	Car9	21.7034	2.70352	19.8147	0.112262	0.981681	CAR9	Mus musculus carbonic anhydrase 9 (Car9), mRNA.	CAIX; MN/CA9
0.484059	Card10	-20.926	29.0468	-10.1294	28.161	0.907533	CARD10	Mus musculus caspase recruitment domain family, member 10 (Card10), mRNA.	AI449026; CARMA3; Bimp1
-0.233175	Card11	-9.96521	5.98215	2.32364	0.29676	0.890862	CARD11	Mus musculus caspase recruitment domain family, member 11 (Card11), mRNA.	BIMP3; 0610008L17Rik; 2410011D02Rik; CARMA1
0.703022	Card14	-73.1927	11.6003	-51.4561	6.98239	0.806078	CARD14	Mus musculus caspase recruitment domain family, member 14 (Card14), mRNA.	Bimp2; CARMA2
1.36466	Carf	189.329	61.343	258.369	99.8472	0.566972	CARF	Mus musculus calcium response factor (Carf), mRNA.	Als2cr8
0.304579	Carhsp1	832.755	19.4068	253.64	128.283	1.10454e-05	CARHSP1	Mus musculus calcium regulated heat stable protein 1 (Carhsp1), mRNA.	MGC101919; Crhsp-24; 1200011K09Rik; D16Ertd465e
1.12254	Carkd	176.729	41.7702	198.386	43.9109	0.827411	CARKD	Mus musculus carbohydrate kinase domain containing (Carkd), mRNA.	2810407E01Rik
1.63693	Carm1	126.334	25.8988	206.799	80.6162	0.448287	CARM1	Mus musculus coactivator-associated arginine methyltransferase 1 (Carm1), mRNA.	MGC46828; Prmt4
2.79691	Cars	1.11492	4.94935	3.11834	16.973	0.980197	CARS	Mus musculus cysteinyl-tRNA synthetase (Cars), mRNA.	CA3
2.46805	Cart	81.1664	66.5502	200.322	187.806	0.472634	CART
1.65168	Cartpt	102.451	40.236	169.217	147.077	0.630818	CARTPT	Mus musculus CART prepropeptide (Cartpt), transcript variant 1, mRNA.	Cart
0.178626	Casc1	-33.9477	19.7702	-6.06395	9.51694	0.751457	CASC1	Mus musculus cancer susceptibility candidate 1 (Casc1), mRNA.	Las1; A230084G12Rik
1.35841	Casc3	2515.71	133.096	3417.37	2.27179	0.0280652	CASC3	Mus musculus cancer susceptibility candidate 3 (Casc3), mRNA.	Mln51; Btz
1.00445	Casc4	329.583	17.7524	331.051	4.78619	0.962661	CASC4	Mus musculus cancer susceptibility candidate 4 (Casc4), transcript variant 1, mRNA.	VGFG2573; D130060C09Rik
1.22101	Casd1	153.697	7.64919	187.665	21.3905	0.72297	CASD1	Mus musculus CAS1 domain containing 1 (Casd1), mRNA.	MGC6840; Cas1; Cast1
0.959875	Cask	807.374	1.49633	774.978	127.622	0.814171	CASK	Mus musculus calcium/calmodulin-dependent serine protein kinase (MAGUK family) (Cask), mRNA.	mLin-2; DXPri1; MGC7449; LIN-2; DXRib1; Pals3
1.6373	Caskin1	1140.35	123.021	1867.09	464.473	0.0916094	CASKIN1	Mus musculus CASK interacting protein 1 (Caskin1), mRNA.	mKIAA1306; C630036E02Rik; 3300002N10Rik; C130061I24
0.911297	Caskin2	204.459	26.6555	186.323	142.822	0.893147	CASKIN2	Mus musculus CASK-interacting protein 2 (Caskin2), mRNA.	mKIAA1139
0.228286	Casp1	181.753	112.12	41.4916	17.0993	0.241246	CASP1	Mus musculus caspase 1 (Casp1), mRNA.	Il1bc; ICE
1.33551	Casp12	54.4016	7.35158	72.6542	23.6601	0.841767	CASP12	Mus musculus caspase 12 (Casp12), mRNA.
0.621281	Casp14	-81.3004	17.4584	-50.5104	19.8504	0.731072	CASP14	Mus musculus caspase 14 (Casp14), mRNA.	mini-ICE; MICE; MGC123949; MGC123948
1.43004	Casp2	388.849	15.917	556.069	200.377	0.320435	CASP2	Mus musculus caspase 2 (Casp2), mRNA.	ICH-1; Nedd2; Caspase-2
0.854096	Casp3	76.5147	34.5563	65.3508	25.5591	0.904968	CASP3	Mus musculus caspase 3 (Casp3), mRNA.	A830040C14Rik; Apopain; Yama; Lice; CPP32; Caspase-3
10.5213	Casp4	1.24144	28.8458	13.0616	5.61458	0.890603	CASP4	Mus musculus caspase 4, apoptosis-related cysteine peptidase (Casp4), mRNA.	Caspl; Casp11; ich-3; Caspase-11
0.499623	Casp6	107.817	22.0066	53.868	0.165283	0.550647	CASP6	Mus musculus caspase 6 (Casp6), mRNA.	Mch2; mCASP-6
1.24515	Casp7	-26.9847	1.56905	-33.5999	3.16745	0.940701	CASP7	Mus musculus caspase 7 (Casp7), mRNA.	CMH-1; AI314680; caspase-7; ICE-IAP3; mCASP-7; Mch3
0.837338	Casp8	49.8765	10.9063	41.7635	38.7498	0.94478	CASP8	Mus musculus caspase 8 (Casp8), transcript variant 2, mRNA.	MACH; FLICE; Caspase-8; Mch5
-0.213767	Casp8ap2	-18.1836	1.28035	3.88705	5.74644	0.805338	CASP8AP2	Mus musculus caspase 8 associated protein 2 (Casp8ap2), mRNA.	FLASH; mKIAA1315; D4Ertd659e; AA387232
0.913099	Casp9	295.359	2.0687	269.692	46.4291	0.835386	CASP9	Mus musculus caspase 9 (Casp9), mRNA.	AI115399; ICE-LAP6; Mch6; AW493809; Caspase-9
0.981167	Casq1	-35.9861	11.2495	-35.3084	3.13407	0.993915	CASQ1	Mus musculus calsequestrin 1 (Casq1), nuclear gene encoding mitochondrial protein, mRNA.	CSQ1; CSQ-1; CSQ
0.367012	Casq2	141.04	21.9833	51.7635	52.0494	0.354277	CASQ2	Mus musculus calsequestrin 2 (Casq2), mRNA.	MGC115896; AW146219; AA033488; ESTM52
0.572078	Casr	75.4008	43.1709	43.1351	28.8498	0.734113	CASR	Mus musculus calcium-sensing receptor (Casr), mRNA.	CaR; Gprc2a
0.758129	Cass4	139.879	30.0812	106.047	31.1715	0.731153	CASS4	Mus musculus Cas scaffolding protein family member 4 (Cass4), transcript variant 1, mRNA.	RP23-228E2.3
1.17623	Cast	48.8849	32.6488	57.4999	41.2588	0.915156	CAST	Mus musculus calpastatin (Cast), mRNA.
0.5062	Casz1	-63.1034	0.597469	-31.943	44.7805	0.739331	CASZ1	Mus musculus castor homolog 1, zinc finger (Drosophila) (Casz1), mRNA.	AV096627; MGC31683; Cst; D4Ertd432e; BC040081; 2410019P08Rik
0.519479	Cat	677.911	89.5164	352.161	65.7419	0.00685147	CAT	Mus musculus catalase (Cat), mRNA.	2210418N07; Cas1; Cas-1; Cs-1
0.487868	Catsper1	-54.4361	0.180404	-26.5577	16.247	0.753894	CATSPER1	Mus musculus cation channel, sperm associated 1 (Catsper1), mRNA.	Catsper; KSper
1.68277	Catsper2	67.7904	11.3829	114.076	122.058	0.708384	CATSPER2	Mus musculus cation channel, sperm associated 2 (Catsper2), mRNA.
1.85865	Catsper3	45.1638	10.3656	83.9438	23.8056	0.672371	CATSPER3	Mus musculus cation channel, sperm associated 3 (Catsper3), mRNA.	MGC107210; CACRC; 4921522D01Rik
1.33562	Catsper4	67.3398	9.32911	89.9404	29.6452	0.805898	CATSPER4	Mus musculus channel, sperm associated 4 (Catsper4), mRNA.	MGC124305; 4933412L05; MGC124306
-0.0618035	Cav1	84.2008	60.6689	-5.2039	1.4479	0.364272	CAV1	Mus musculus caveolin 1, caveolae protein (Cav1), mRNA.	Cav; Cav-1
0.557691	Cav2	-23.7992	8.40068	-13.2726	21.4208	0.897326	CAV2	Mus musculus caveolin 2 (Cav2), mRNA.	AI447843
0.389939	Cav3	-60.525	8.7796	-23.601	6.70467	0.678047	CAV3	Mus musculus caveolin 3 (Cav3), mRNA.	Cav-3; M-caveolin; AI385751; caveolin-3; M-cav
1.29353	Cbara1	297.349	53.9128	384.629	159.188	0.554427	CBARA1
1.96626	Cbfa2t2	92.4463	14.8926	181.773	119.454	0.493825	CBFA2T2	Mus musculus core-binding factor, runt domain, alpha subunit 2, translocated to, 2 (human) (Cbfa2t2), mRNA.	A430091M07; Cbfa2t2h; MTGR1; C330013D05Rik
0.722674	Cbfa2t3h	42.5334	11.2451	30.7377	4.62856	0.890283	CBFA2T3H	Mus musculus core-binding factor, runt domain, alpha subunit 2, translocated to, 3 homolog (human) (Cbfa2t3h), mRNA.	ETO-2; A630044F12Rik; MTGR2
0.912667	Cbfb	822.285	19.3146	750.473	115.989	0.679673	CBFB	Mus musculus core binding factor beta (Cbfb), mRNA.	PEBP2b; Pebp2; PEA2; Pebpb2; AI893578
2.31861	Cbl	50.3442	2.73703	116.728	104.082	0.564373	CBL	Mus musculus Casitas B-lineage lymphoma (Cbl), mRNA.	Cbl-2; c-Cbl; 4732447J05Rik
1.07087	Cblb	186.715	56.9567	199.947	6.29851	0.922803	CBLB	Mus musculus Casitas B-lineage lymphoma b (Cblb), mRNA. XM_001003462 XM_001003472 XM_001003476 XM_001003639 XM_001003649 XM_156257 XM_902056 XM_902058 XM_917535 XM_924994 XM_924996	AI851073; AI429560; Cbl-b
0.837716	Cblc	-52.0128	11.2386	-43.572	26.3462	0.925376	CBLC	Mus musculus Casitas B-lineage lymphoma c (Cblc), mRNA.	MGC117886; 2310079L19Rik; Cbl3; 2310076I21Rik
0.810202	Cbll1	100.461	31.687	81.3936	53.6638	0.845844	CBLL1	Mus musculus Casitas B-lineage lymphoma-like 1 (Cbll1), mRNA.	c-Cbl-like; Hakai; AI467391
1.03471	Cbln1	1886.88	582.652	1952.38	182.483	0.891333	CBLN1	Mus musculus cerebellin 1 precursor protein (Cbln1), mRNA.	AI323299
5.02864	Cbln2	116.982	21.0499	588.26	141.865	0.0027215	CBLN2	Mus musculus cerebellin 2 precursor protein (Cbln2), mRNA.	A730004O05; 6330593N19Rik
0.331968	Cbln3	433.102	110.17	143.776	135.446	0.0579889	CBLN3	Mus musculus cerebellin 3 precursor protein (Cbln3), mRNA.
1.28357	Cbln4	408.768	4.82513	524.684	376.367	0.680242	CBLN4	Mus musculus cerebellin 4 precursor protein (Cbln4), mRNA.	AI848962
1.30838	Cbr1	515.027	30.3578	673.853	180.836	0.313288	CBR1	Mus musculus carbonyl reductase 1 (Cbr1), mRNA.	CR; Cbr; AW261796
-0.65244	Cbr2	9.48801	33.7219	-6.19036	13.9103	0.864461	CBR2	Mus musculus carbonyl reductase 2 (Cbr2), mRNA.	MLCR
0.963257	Cbr3	51.2767	36.6442	49.3926	19.0055	0.981487	CBR3	Mus musculus carbonyl reductase 3 (Cbr3), mRNA.	1110001J05Rik; C81353; MGC99956
0.4255	Cbs	59.3172	36.1518	25.2394	2.28632	0.70549	CBS	Mus musculus cystathionine beta-synthase (Cbs), transcript variant 1, mRNA.	MGC37300; MGC18895; AI047524; AI303044; MGC18856; HIP4
0.519401	Cbwd1	401.759	6.48327	208.674	4.76498	0.0496103	CBWD1	Mus musculus COBW domain containing 1 (Cbwd1), mRNA.	MGC28027; AV349248; MGC59411; BC018472
0.433078	Cbx2	-39.4391	24.5822	-17.0802	9.33137	0.80425	CBX2	Mus musculus chromobox homolog 2 (Drosophila Pc class) (Cbx2), mRNA.	pc; MOD2; M33
0.729554	Cbx3	299.578	24.2318	218.559	167.622	0.58635	CBX3	Mus musculus chromobox homolog 3 (Drosophila HP1 gamma) (Cbx3), mRNA.	MGC118084; HP1g; M32
1.19082	Cbx4	274.031	23.965	326.322	49.2622	0.611951	CBX4	Mus musculus chromobox homolog 4 (Drosophila Pc class) (Cbx4), mRNA.	MPc2; MGC143698; MGC143697; PC2
0.960125	Cbx5	550.347	88.3499	528.402	240.993	0.923256	CBX5	Mus musculus chromobox homolog 5 (Drosophila HP1a) (Cbx5), transcript variant 2, mRNA.	C75991; 2610029O15Rik; Hp1a; HP1
1.06373	Cbx6	4340.22	12.9497	4616.83	632.209	0.614846	CBX6	Mus musculus chromobox homolog 6 (Cbx6), mRNA.
2.72516	Cbx7	29.0886	7.38895	79.271	18.0204	0.58338	CBX7	Mus musculus chromobox homolog 7 (Cbx7), mRNA.	AI851678; D15Ertd417e; 1600014J01Rik
0.214875	Cbx8	-42.6009	4.9667	-9.15386	27.2497	0.711042	CBX8	Mus musculus chromobox homolog 8 (Drosophila Pc class) (Cbx8), mRNA.	Pc3
1.22187	Cby1	174.739	18.0208	213.509	93.4716	0.658516	CBY1	Mus musculus chibby homolog 1 (Drosophila) (Cby1), mRNA.	Pgea1; arb1; PGEA14; 1110014P06Rik; CBY
2.30245	Cc2d1a	236.189	46.888	543.813	178.424	0.0502708	CC2D1A	Mus musculus coiled-coil and C2 domain containing 1A (Cc2d1a), mRNA.	MGC27560; BC016188; MGC38983; Freud-1
1.57365	Cc2d1b	76.5642	10.0172	120.486	8.13715	0.636612	CC2D1B	Mus musculus coiled-coil and C2 domain containing 1B (Cc2d1b), mRNA.	A830039B04Rik
1.60397	Cc2d2a	501.437	111.05	804.292	383.944	0.306046	CC2D2A	Mus musculus coiled-coil and C2 domain containing 2A (Cc2d2a), mRNA.
1.06672	Ccar1	859.777	92.1688	917.142	265.13	0.791466	CCAR1
0.575862	Ccbe1	-74.3097	8.89032	-42.7921	17.1598	0.723021	CCBE1	Mus musculus collagen and calcium binding EGF domains 1 (Ccbe1), mRNA.	4933426F18Rik; mKIAA1983; 9430093N24Rik; MGC118667; KIAA1983
[truncated: 14,865 more rows]

## Sheet:  (2) Diff. genes p<0.05 FC
FC	SYMBOL	Input.AVG_Signal	Input.ARRAY_STDEV	IP.AVG_Signal	IP.ARRAY_STDEV	IP.Diff Pval	ILMN_GENE	DEFINITION	SYNONYMS
15.4312	Crh	24.1164	13.5165	372.145	87.5726	0.00127015	CRH	Mus musculus corticotropin releasing hormone (Crh), mRNA.	Gm1347; CRF; MGC151298
9.67064	Calca	87.3764	11.1618	844.986	40.7653	6.7287e-06	CALCA
6.7996	Crhbp	67.3836	9.34766	458.182	25.0189	0.000374919	CRHBP	Mus musculus corticotropin releasing hormone binding protein (Crhbp), mRNA.	CRH-BP
6.61828	Slc35d3	119.329	17.1491	789.755	185.655	2.36134e-05	SLC35D3	Mus musculus solute carrier family 35, member D3 (Slc35d3), mRNA.	Frcl1; 6230421J19Rik
5.95664	Lmx1a	104.265	45.5679	621.068	150.487	0.00077035	LMX1A	Mus musculus LIM homeobox transcription factor 1 alpha (Lmx1a), mRNA.	MGC129357; Lmx1.1; dr; dreher; sst; MGC129356
5.92408	Nts	251.422	34.9602	1489.44	254.749	3.75582e-09	NTS	Mus musculus neurotensin (Nts), mRNA.	5033428E16Rik; NMN-125; NN; NT; NT/N; NTS1
5.02864	Cbln2	116.982	21.0499	588.26	141.865	0.0027215	CBLN2	Mus musculus cerebellin 2 precursor protein (Cbln2), mRNA.	A730004O05; 6330593N19Rik
4.35546	Lrrc7	63.5927	2.22501	276.975	54.8451	0.0318222	LRRC7	Mus musculus leucine rich repeat containing 7 (Lrrc7), mRNA.	mKIAA1365; AK122498
4.23776	Hook2	69.2272	32.1202	293.368	45.5009	0.0277844	HOOK2	Mus musculus hook homolog 2 (Drosophila) (Hook2), mRNA.	MGC91008; MGC28586; A630054I03Rik
4.03349	Ecel1	180.494	66.4786	728.021	302.736	0.0203551	ECEL1	Mus musculus endothelin converting enzyme-like 1 (Ecel1), mRNA.	DINE; xce
3.83205	Tac1	217.283	47.8871	832.641	382.134	0.0314699	TAC1	Mus musculus tachykinin 1 (Tac1), mRNA.	PPT-A; NK-1; NK1; 4930528L02Rik; MGC151458; SP; Nkna
3.74696	B4galnt4	148.978	37.4126	558.214	209	0.0185599	B4GALNT4	Mus musculus beta-1,4-N-acetyl-galactosaminyl transferase 4 (B4galnt4), mRNA.	Gm1095; BC038881; MGC48196; beta4GalNAcT4
3.67952	Ftsj3	118.769	13.2054	437.012	154.866	0.0240849	FTSJ3	Mus musculus FtsJ homolog 3 (E. coli) (Ftsj3), mRNA.	AA537063; AU045295; Epcs3; C79843; D11Ertd400e
3.58428	Fchsd1	97.7725	68.9504	350.444	25.6135	0.0417535	FCHSD1	Mus musculus FCH and double SH3 domains 1 (Fchsd1), mRNA.	A030002D08Rik
3.57211	Adcyap1	822.804	116.949	2939.15	627.037	4.10587e-06	ADCYAP1	Mus musculus adenylate cyclase activating polypeptide 1 (Adcyap1), mRNA.	PACAP
3.55814	Sema3c	178.947	10.7233	636.717	245.37	0.0189802	SEMA3C
3.52957	Celsr3	209.986	20.6986	741.161	89.2107	0.000610037	CELSR3	Mus musculus cadherin, EGF LAG seven-pass G-type receptor 3 (flamingo homolog, Drosophila) (Celsr3), mRNA.	mKIAA0812
3.43446	Dgkk	142.272	1.32706	488.627	191.17	0.0323995	DGKK	Mus musculus diacylglycerol kinase kappa (Dgkk), mRNA.	Gm360
3.35857	Spnb3	445.542	85.314	1496.38	263.154	9.46349e-07	SPNB3	Mus musculus spectrin beta 3 (Spnb3), mRNA.	mKIAA0302; MGC99874; KIAA0302
3.26157	Wdr6	341.105	25.1349	1112.54	507.599	0.0371484	WDR6	Mus musculus WD repeat domain 6 (Wdr6), mRNA.
3.22673	Dgka	102.853	42.8861	331.879	21.001	0.0309449	DGKA	Mus musculus diacylglycerol kinase, alpha (Dgka), mRNA.	AW146112; 80kDa; Dagk1
3.13073	Wbp7	155.064	28.3702	485.463	72.7083	0.00334657	WBP7	Mus musculus WW domain binding protein 7 (Wbp7), mRNA.	Mll2; 2610014H22Rik; mKIAA0304
3.01744	Ints1	297.451	66.8495	897.541	233.866	0.0018777	INTS1	Mus musculus integrator complex subunit 1 (Ints1), mRNA.	KIAA1440; 1110015K06Rik
3.0073	Cdan1	162.479	8.53267	488.625	146.089	0.0168643	CDAN1	Mus musculus congenital dyserythropoietic anemia, type I (human) (Cdan1), mRNA. XM_925221 XM_985468 XM_985530 XM_985568	CDA1; MGC144128; AI448026; 1500015A01Rik; CDA-I; AW492297; CDAI
2.992	Wdr9	166.097	73.0135	496.961	190.052	0.0496136	WDR9
2.90877	Rpgrip1l	176.224	40.2542	512.594	116.696	0.00653168	RPGRIP1L	Mus musculus Rpgrip1-like (Rpgrip1l), mRNA.	1700047E16Rik; Ftm; 4931437C01
2.84486	Rasgrf1	1487.81	174.791	4232.62	1168.32	0.00918115	RASGRF1	Mus musculus RAS protein-specific guanine nucleotide-releasing factor 1 (Rasgrf1), transcript variant 1, mRNA.	CDC25Mm; p190; p190RhoGEF; Ras-GRF1; Grfbeta; Grf1; P190-A; CDC25
2.81989	Klhl1	465.701	4.51539	1313.23	523.6	0.0262663	KLHL1	Mus musculus kelch-like 1 (Drosophila) (Klhl1), mRNA.	KIAA1490; mKIAA1490
2.77992	Trrap	210.669	92.7053	585.641	36.1251	0.00543194	TRRAP	Mus musculus transformation/transcription domain-associated protein (Trrap), mRNA.	AI481500
2.75375	Vars2	138.162	3.84395	380.463	51.5231	0.0214714	VARS2	Mus musculus valyl-tRNA synthetase 2, mitochondrial (putative) (Vars2), mRNA.	1190004I24Rik; Vars2l; mKIAA1885
2.71939	Zfc3h1	675.755	60.3614	1837.64	806.211	0.0445396	ZFC3H1	Mus musculus zinc finger, C3H1-type containing (Zfc3h1), mRNA. XM_925322	BC033596; Psrc2
2.70749	Ahsa2	234.903	50.032	635.999	94.2017	0.00154425	AHSA2	Mus musculus AHA1, activator of heat shock protein ATPase homolog 2 (yeast) (Ahsa2), mRNA.	RP23-188K3.2; 1110064P04Rik; AI450991; FLJ36626
2.68608	Zfp92	300.595	132.901	807.422	280.859	0.0321349	ZFP92	Mus musculus zinc finger protein 92 (Zfp92), mRNA.
2.65554	Chd6	135.979	52.8546	361.098	53.565	0.0399475	CHD6	Mus musculus chromodomain helicase DNA binding protein 6 (Chd6), mRNA.	5430439G14Rik; 6330406J24Rik
2.65001	Tcfap2b	155.213	15.5999	411.314	85.304	0.0269814	TCFAP2B
2.63332	Kcna4	147.502	19.2877	388.421	25.7711	0.0228853	KCNA4	Mus musculus potassium voltage-gated channel, shaker-related subfamily, member 4 (Kcna4), mRNA.	MGC124445; Kv1.4
2.59689	B930037P14Rik	191.304	42.2173	496.795	86.5327	0.00817084	B930037P14RIK	Mus musculus RIKEN cDNA B930037P14 gene (B930037P14Rik), mRNA.
2.5418	Akap8l	405.374	86.8004	1030.38	301.039	0.00870337	AKAP8L	Mus musculus A kinase (PRKA) anchor protein 8-like (Akap8l), mRNA.	HAP95; Nakap95
2.53544	Herc2	900.38	203.859	2282.86	322.329	1.09405e-05	HERC2	Mus musculus hect (homologous to the E6-AP (UBE3A) carboxyl terminus) domain and RCC1 (CHC1)-like domain (RLD) 2 (Herc2), mRNA.	D15F32S1h; mKIAA0393; KIAA0393; jdf2; rjs; D7H15F32S1; D7H15F37S1
2.53004	Ift172	158.335	13.8739	400.595	77.4314	0.0219206	IFT172	Mus musculus intraflagellar transport 172 homolog (Chlamydomonas) (Ift172), mRNA.	wim; Slb; 4930553F24Rik
2.52241	Sgsm1	634.451	126.745	1600.34	233.693	2.24703e-05	SGSM1	Mus musculus small G protein signaling modulator 1 (Sgsm1), mRNA.	AA408781; E130107M15; D5Bwg1524e; 2410098H20Rik
2.51077	Amigo2	388.06	20.5385	974.33	256.192	0.00381535	AMIGO2	Mus musculus adhesion molecule with Ig like domain 2 (Amigo2), mRNA.	AI415330; AW208913; Ali1
2.49079	Zc3h13	229.842	43.2606	572.488	97.5048	0.0117398	ZC3H13	Mus musculus zinc finger CCCH type containing 13 (Zc3h13), mRNA.	C87618; 4930570G11Rik; 3110050K21Rik; 2600010B19Rik
2.48821	Plxna2	228.738	60.3109	569.149	190.946	0.040912	PLXNA2	Mus musculus plexin A2 (Plxna2), mRNA.	AA589422; 2810428A13Rik; OCT; mKIAA0463; Plxn2; AW457381
2.47969	Odz1	799.996	149.446	1983.74	207.513	1.15763e-05	ODZ1	Mus musculus odd Oz/ten-m homolog 1 (Drosophila) (Odz1), mRNA.	Ten-m1; Odz2; TCAP-1
2.47158	Fbxo6	239.384	95.3881	591.657	146.827	0.0202007	FBXO6	Mus musculus F-box protein 6 (Fbxo6), mRNA.	Fbx6b; Fbxo6b; FBG2; AA408845; Fbs2
2.46938	4933427D14Rik	251.637	35.2788	621.388	169.804	0.0141543	4933427D14RIK	Mus musculus RIKEN cDNA 4933427D14 gene (4933427D14Rik), mRNA.	RP23-207N15.3; C85113
2.45123	C330023M02Rik	151.898	48.1197	372.338	64.1495	0.0433484	C330023M02RIK	Mus musculus RIKEN cDNA C330023M02 gene (C330023M02Rik), mRNA.	A630046C11; AI450868; 4833422K13Rik
2.38307	Mprip	206.391	12.4695	491.842	122.001	0.0154318	MPRIP	Mus musculus myosin phosphatase Rho interacting protein (Mprip), transcript variant 1, mRNA.	9530046C02; RP23-180B18.4; MGC67316; p116Rip; AI647711; Rhoip3; RIP3; C76423; mKIAA0864
2.37631	Bzrap1	453.681	20.5419	1078.09	59.764	0.000108637	BZRAP1	Mus musculus benzodiazapine receptor associated protein 1 (Bzrap1), mRNA.	D230016K05; mKIAA0612
2.33489	Fbf1	236.367	26.7253	551.89	58.9348	0.0069975	FBF1	Mus musculus Fas (TNFRSF6) binding factor 1 (Fbf1), mRNA.	1110033G01Rik; RP23-42F6.10; mKIAA1863; 5930413D20
2.31987	Slc16a14	163.195	9.78753	378.592	19.3764	0.0409561	SLC16A14	Mus musculus solute carrier family 16 (monocarboxylic acid transporters), member 14 (Slc16a14), mRNA.	1110004H10Rik
2.3065	C030019I05Rik	425.397	118.623	981.179	132.894	0.00125203	C030019I05RIK	Mus musculus RIKEN cDNA C030019I05 gene (C030019I05Rik), mRNA.	MGC27121; RP23-370F7.2; MGC129499; MGC129498
2.30259	Mycbp2	687.962	40.1213	1584.09	472.918	0.00967004	MYCBP2	Mus musculus MYC binding protein 2 (Mycbp2), mRNA.	Pam; R75243; AW107953; C130061D10Rik; AW546647; AU023734
2.3008	Flrt3	998.852	44.8024	2298.16	66.5099	4.87027e-06	FLRT3	Mus musculus fibronectin leucine rich transmembrane protein 3 (Flrt3), mRNA.	5530600M07Rik; mKIAA1469; C430047I10Rik
2.28045	A230050P20Rik	611.222	239.928	1393.86	336.182	0.0102634	A230050P20RIK	Mus musculus RIKEN cDNA A230050P20 gene (A230050P20Rik), mRNA.
2.26594	Fry	180.116	19.2881	408.131	40.303	0.0334682	FRY	PREDICTED: Mus musculus furry homolog (Drosophila) (Fry), mRNA.
2.25559	Polrmt	245.411	29.8206	553.546	4.79728	0.00870106	POLRMT	Mus musculus polymerase (RNA) mitochondrial (DNA directed) (Polrmt), nuclear gene encoding mitochondrial protein, mRNA.	MGC118526; 4932416K13; 1110018N15Rik
2.24105	Nup210	272.457	7.63116	610.59	18.699	0.00535583	NUP210	Mus musculus nucleoporin 210 (Nup210), mRNA.	Pom210; 9830001L10; gp210; AI836801; gp190
2.23775	Lmo1	172.29	4.14639	385.541	83.7351	0.0464883	LMO1	Mus musculus LIM domain only 1 (Lmo1), mRNA.	Rbtn1; Rbtn-1; Ttg1
2.23455	Myh10	611.376	67.6559	1366.15	128.096	8.81143e-05	MYH10	Mus musculus myosin, heavy polypeptide 10, non-muscle (Myh10), mRNA.	Myhn-2; 5730504C04Rik; SMemb; NMHC-B; 9330167F11Rik; MGC115764; mKIAA3005; NMHC II-B; Myhn2
2.22816	Dhx38	331.897	15.6413	739.52	138.815	0.00224956	DHX38	Mus musculus DEAH (Asp-Glu-Ala-His) box polypeptide 38 (Dhx38), mRNA.	Prp16; Ddx38; AW540902; AI325984; 5730550P09Rik; mKIAA0224
2.22218	Gnl2	580.308	36.9131	1289.55	187.277	0.0160739	GNL2	Mus musculus guanine nucleotide binding protein-like 2 (nucleolar) (Gnl2), mRNA.	Ngp-1; MGC7863; BC003262; HUMAUANTIG
2.21658	Gpsm1	187.075	49.2506	414.668	3.58184	0.0417609	GPSM1	Mus musculus G-protein signalling modulator 1 (AGS3-like, C. elegans) (Gpsm1), mRNA.	AW107933; 1810037C22Rik; Ags3
2.20628	Nav1	272.62	87.3628	601.477	48.9977	0.0219867	NAV1	Mus musculus neuron navigator 1 (Nav1), mRNA.	9930003A20Rik; POMFIL3; mKIAA1151; unc53H1; 9530089B19; C230080M11Rik; steerin-1
2.19366	Tro	715.584	82.5569	1569.75	479.329	0.0242726	TRO	Mus musculus trophinin (Tro), transcript variant 1, mRNA.	Tnn; magphinin; Maged3l; AA409408; Trol; Maged3
2.18352	Scg2	3117.42	62.1643	6806.93	846.975	1.94039e-06	SCG2	Mus musculus secretogranin II (Scg2), mRNA.	SgII; Chgc
2.1824	Chd8	369.992	56.1341	807.47	65.1176	0.00192965	CHD8	Mus musculus chromodomain helicase DNA binding protein 8 (Chd8), mRNA.	mKIAA1564; Duplin; 5830451P18Rik; HELSNF1; AU015341
2.14759	Vat1l	2316.71	377.965	4975.35	1135.87	0.00178355	VAT1L	Mus musculus vesicle amine transport protein 1 homolog-like (T. californica) (Vat1l), mRNA.	9430073I07; mKIAA1576
2.14532	Peg3	1419.22	122.593	3044.67	155.187	1.12181e-05	PEG3	Mus musculus paternally expressed 3 (Peg3), mRNA.	Gcap4; End4; mKIAA0287; AL022617; Zfp102; Pw1
2.14142	Mical3	474.183	84.3813	1015.42	253.648	0.00937982	MICAL3	Mus musculus microtubule associated monoxygenase, calponin and LIM domain containing 3 (Mical3), mRNA.	mKIAA1364; MICAL-3; C130040D16Rik
2.13053	Ahi1	2510.6	646	5348.91	1165.35	0.00270341	AHI1	Mus musculus Abelson helper integration site (Ahi1), mRNA.	D10Bwg0629e; 1700015F03Rik; Ahi-1
2.12557	LOC100048721	720.066	56.0799	1530.55	77.9544	0.000360265	LOC100048721	PREDICTED: Mus musculus similar to fibronectin leucine rich transmembrane protein 3, transcript variant 1 (LOC100048721), mRNA.
2.12249	Mib2	537.4	95.7857	1140.63	180.611	0.000718973	MIB2	Mus musculus mindbomb homolog 2 (Drosophila) (Mib2), mRNA.	skd; Zzank1; 2210008I11Rik
2.12104	Cacna2d1	1310.92	171.06	2780.51	198.956	3.1509e-05	CACNA2D1	Mus musculus calcium channel, voltage-dependent, alpha2/delta subunit 1 (Cacna2d1), mRNA.	MGC141430; Cchl2a; Cacna2
2.08881	L3mbtl2	199.294	30.9216	416.287	62.5329	0.0456122	L3MBTL2	Mus musculus l(3)mbt-like 2 (Drosophila) (L3mbtl2), mRNA.	MGC31247; M4mbt; 4732493N06Rik
2.07566	Pnoc	235.994	4.92255	489.843	86.7902	0.0243378	PNOC	Mus musculus prepronociceptin (Pnoc), mRNA.	OFQ/N; N23K; N/OFQ; Npnc1
2.05526	Ep400	367.995	41.0367	756.326	166.132	0.00933817	EP400	Mus musculus E1A binding protein p400 (Ep400), transcript variant 1, mRNA.	mDomino; AU023439; 1700020J09Rik; mKIAA1498; p400
2.04781	Mcf2l	390.079	13.5988	798.807	222.56	0.0212174	MCF2L	Mus musculus mcf.2 transforming sequence-like (Mcf2l), mRNA.	mKIAA0362; Ost; C130040G20Rik; Ost gamma; Dbs
2.0467	Atp13a1	435.387	10.4595	891.108	90.0146	0.00301552	ATP13A1	Mus musculus ATPase type 13A1 (Atp13a1), mRNA.	catp; Atp13a; Cgi152
2.03485	6430598A04Rik	300.972	26.4865	612.433	156.193	0.0288991	6430598A04RIK	Mus musculus RIKEN cDNA 6430598A04 gene (6430598A04Rik), mRNA.
2.03183	Eif4g1	575.51	26.7655	1169.34	203.516	0.000519843	EIF4G1	Mus musculus eukaryotic translation initiation factor 4, gamma 1 (Eif4g1), transcript variant 1, mRNA.	E030015G23Rik; MGC90776; MGC37551; eIF4GI
2.02826	Pam	1827.38	361.434	3706.4	871.797	0.0052423	PAM	Mus musculus peptidylglycine alpha-amidating monooxygenase (Pam), mRNA.	PHM
2.02624	C030018G13Rik	622.233	92.2729	1260.79	239.986	0.00155596	C030018G13RIK	PREDICTED: Mus musculus RIKEN cDNA C030018G13 gene (C030018G13Rik), mRNA.
2.02323	Rab3gap2	219.033	2.80495	443.154	63.6332	0.0408809	RAB3GAP2	PREDICTED: Mus musculus RAB3 GTPase activating protein subunit 2, transcript variant 4 (Rab3gap2), mRNA.
2.01849	Syngr3	634.152	12.7603	1280.03	373.208	0.0210115	SYNGR3	Mus musculus synaptogyrin 3 (Syngr3), mRNA.
2.00928	Map3k4	667.973	163.252	1342.15	138.534	0.00192032	MAP3K4	Mus musculus mitogen-activated protein kinase kinase kinase 4 (Map3k4), mRNA.	Mek4b; MAPKKK4; mKIAA0213; Mekk4; RP17; Rp17a; MTK1; D17Rp17e; D17Rp17
1.99721	Zmym3	595.173	95.9803	1188.69	117.736	0.0153659	ZMYM3	Mus musculus zinc finger, MYM-type 3 (Zmym3), mRNA.	MGC118059; Zfp261; AW122925; 9030216B10Rik
1.99676	Dfna5h	250.453	21.7905	500.094	48.4738	0.0278411	DFNA5H	Mus musculus deafness, autosomal dominant 5 homolog (human) (Dfna5h), mRNA.	4932441K13Rik; 2310037D07Rik; DFNA5; Fin15
1.98345	Sfrs14	899.126	50.116	1783.38	512.605	0.0183947	SFRS14	Mus musculus splicing factor, arginine/serine-rich 14 (Sfrs14), mRNA.	mKIAA0365; MGC66544
1.98211	Edc4	911.043	267.021	1805.79	275.122	0.00265285	EDC4	Mus musculus enhancer of mRNA decapping 4 (Edc4), mRNA.	BC022641
1.95878	Tpbg	1173.39	194.881	2298.41	19.8962	0.00032456	TPBG	Mus musculus trophoblast glycoprotein (Tpbg), mRNA.	5T4; AW495680
1.95596	Tnrc4	1283.74	225.566	2510.96	686.873	0.0179764	TNRC4	Mus musculus trinucleotide repeat containing 4 (Tnrc4), mRNA.	CAGH4; BRUNOL1; 4930415M08Rik; ERDA4; Celf3
1.95022	Bbs2	285.623	18.6293	557.026	38.5237	0.0210298	BBS2	Mus musculus Bardet-Biedl syndrome 2 (human) (Bbs2), mRNA.	2410125H22Rik; AI447581
1.92432	Ercc4	258.701	10.3382	497.824	92.0946	0.0479367	ERCC4	Mus musculus excision repair cross-complementing rodent repair deficiency, complementation group 4 (Ercc4), mRNA.	AI606920; Xpf
1.90481	Smarca1	402.876	101.222	767.404	170.632	0.0275283	SMARCA1	Mus musculus SWI/SNF related, matrix associated, actin dependent regulator of chromatin, subfamily a, member 1 (Smarca1), mRNA.	Snf2l; 5730494M04Rik
1.88659	Bclaf1	2059.67	119.452	3885.75	1251.73	0.0322041	BCLAF1	Mus musculus BCL2-associated transcription factor 1 (Bclaf1), transcript variant 2, mRNA.	AI450190; 2610102K23Rik; AW556225; Btf; mKIAA0164; 5730534O06Rik; 2700025J07Rik; MGC58035; MGC30519; KIAA0164; 2810454G14Rik
1.88213	Mcm3ap	460.417	86.716	866.564	71.8375	0.00802357	MCM3AP	Mus musculus minichromosome maintenance deficient 3 (S. cerevisiae) associated protein (Mcm3ap), mRNA.	mKIAA0572; GANP
1.87408	Pnpla6	702.191	16.5504	1315.96	136.59	0.000892692	PNPLA6	Mus musculus patatin-like phospholipase domain containing 6 (Pnpla6), mRNA.	AI661849; MSws; Nte
1.87174	Ap3b2	588.797	111.345	1102.08	329.193	0.0491273	AP3B2	Mus musculus adaptor-related protein complex 3, beta 2 subunit (Ap3b2), mRNA.	Naptb; beta3B; AU042881; beta-NAP; AI549966; MGC36656; [b]-NAP
1.86244	Hdac3	866.197	92.7746	1613.24	247.364	0.000714419	HDAC3	Mus musculus histone deacetylase 3 (Hdac3), mRNA.	AW537363
1.85952	Sec24b	297.185	27.6974	552.62	103.291	0.0295379	SEC24B	Mus musculus Sec24 related gene family, member B (S. cerevisiae) (Sec24b), mRNA.	SEC24; AI605202
1.84526	Ppp1r9a	638.195	155.112	1177.63	229.056	0.0118424	PPP1R9A	Mus musculus protein phosphatase 1, regulatory (inhibitor) subunit 9A (Ppp1r9a), mRNA.	2810430P21Rik; neurabin-I; BB181831; mKIAA1222; 5330407E15; A230094E16Rik; 4930518N04Rik
1.84071	Hcfc1	1413.39	10.2492	2601.64	601.883	0.00669346	HCFC1	Mus musculus host cell factor C1 (Hcfc1), mRNA.	AW060991; HCF-1; HCF1
1.83374	Tusc4	527.192	37.2442	966.732	237.378	0.0216878	TUSC4	Mus musculus tumor suppressor candidate 4 (Tusc4), mRNA.	NPR2L; 2810446G01Rik; G21; NPRL2
1.8198	LOC100045019	786.769	11.5641	1431.76	383.099	0.0246453	LOC100045019	PREDICTED: Mus musculus similar to Tubulin, gamma 2 (LOC100045019), mRNA.
1.81729	Tubgcp3	600.644	31.5081	1091.54	278.321	0.0240731	TUBGCP3	Mus musculus tubulin, gamma complex associated protein 3 (Tubgcp3), mRNA.	Spc98p; GCP3
1.80888	Ikbkap	458.112	7.27088	828.669	175.694	0.016296	IKBKAP	Mus musculus inhibitor of kappa light polypeptide enhancer in B-cells, kinase complex-associated protein (Ikbkap), mRNA.	Elp1; 3110040G09Rik; C78473; 6030413P05
1.8072	Cnot10	449.488	5.80511	812.313	75.3843	0.0086732	CNOT10	Mus musculus CCR4-NOT transcription complex, subunit 10 (Cnot10), mRNA.	MGC37693; 2600001P13Rik
1.79892	Dync1h1	2866.86	94.4302	5157.24	123.681	0.000123146	DYNC1H1	Mus musculus dynein cytoplasmic 1 heavy chain 1 (Dync1h1), mRNA.	Loa; Dnchc1; AI894280; 9930018I23Rik; mKIAA0325; Dnec1; DNCL; P22; DHC1a; MAP1C; Dnecl; DHC1
1.79792	Sfxn4	520.342	76.7439	935.533	113.483	0.0105442	SFXN4	Mus musculus sideroflexin 4 (Sfxn4), mRNA.	MGC107253
1.79469	Usp29	1218.36	201.667	2186.57	587.616	0.0306606	USP29	Mus musculus ubiquitin specific peptidase 29 (Usp29), mRNA.	Ocat
1.79386	Dhx30	776.556	39.9533	1393.03	172.03	0.00136335	DHX30	Mus musculus DEAH (Asp-Glu-Ala-His) box polypeptide 30 (Dhx30), mRNA.	2810477H02Rik; C130058C04Rik; Ddx30; HELG; AA682062; AU015424
1.79345	Cit	427.37	92.4055	766.469	81.2187	0.0213041	CIT	Mus musculus citron (Cit), mRNA.	CRIK; C030025P15Rik; Cit-k; CRIK-SK
1.79195	Gprasp1	2092.44	200.938	3749.56	266.187	0.00302126	GPRASP1	Mus musculus G protein-coupled receptor associated sorting protein 1 (Gprasp1), transcript variant 3, mRNA.	C87852; MGC100209; GASP1; GASP; 3110031O14Rik; 2210415K24Rik
1.7859	Jarid1c	408.216	17.4224	729.035	119.578	0.0285304	JARID1C	Mus musculus jumonji, AT rich interactive domain 1C (Rbp2 like) (Jarid1c), mRNA.	Smcx; mKIAA0234
1.78144	Fbxo34	450.944	79.7595	803.331	61.2854	0.0298588	FBXO34	Mus musculus F-box protein 34 (Fbxo34), mRNA.	2900057B08Rik; 5830426G16Rik
1.77866	Sema5b	365.19	6.30957	649.552	89.3989	0.0227502	SEMA5B
1.77625	Kif21a	1978.12	217.494	3513.64	624.597	0.00125014	KIF21A	Mus musculus kinesin family member 21A (Kif21a), mRNA.	AI850764; mKIAA1708
1.76702	Agrn	1761.97	280.627	3113.44	490.149	0.00120103	AGRN	Mus musculus agrin (Agrn), mRNA.	Agrin
1.75527	4632411B12Rik	404.413	8.08851	709.854	38.6974	0.0376644	4632411B12RIK	Mus musculus RIKEN cDNA 4632411B12 gene (4632411B12Rik), mRNA.	AI647574; C85723; mKIAA1310; AI431067; 4932435K23
1.74852	Ubr5	806.809	114.774	1410.72	140.306	0.00358071	UBR5	Mus musculus ubiquitin protein ligase E3 component n-recognin 5 (Ubr5), mRNA.	4432411E13Rik; C77315; D030042K14; Edd; AW549941; mKIAA0896; Edd1
1.7403	Dpysl5	382.662	92.3237	665.949	53.3236	0.0431488	DPYSL5	Mus musculus dihydropyrimidinase-like 5 (Dpysl5), mRNA.	CRAM; Crmp5; CRMP-5
1.73587	Trip12	1063.97	268.258	1846.92	130.385	0.0257008	TRIP12	Mus musculus thyroid hormone receptor interactor 12 (Trip12), mRNA.	6720416K24Rik; 1110036I07Rik; AA410158; MGC31615; Gtl6
1.72026	Tsc2	1244.11	112.862	2140.19	16.984	0.0017222	TSC2	Mus musculus tuberous sclerosis 2 (Tsc2), transcript variant 2, mRNA.	Tcs2
1.71676	Apeh	1132.48	129.813	1944.2	35.3018	0.00186981	APEH	Mus musculus acylpeptide hydrolase (Apeh), mRNA.	MGC38101
1.71339	Znhit6	1277	61.3372	2188.01	410.669	0.00307773	ZNHIT6	Mus musculus zinc finger, HIT type 6 (Znhit6), mRNA.
1.70901	Eps15l1	568.794	82.4633	972.073	76.0869	0.0120282	EPS15L1	Mus musculus epidermal growth factor receptor pathway substrate 15-like 1 (Eps15l1), mRNA.	Eps15R; Eps15-rs; AI593686; 9830147J04Rik
1.70567	Clstn3	1043.42	119.795	1779.73	96.9677	0.0210306	CLSTN3	Mus musculus calsyntenin 3 (Clstn3), mRNA.	Cst-3; mKIAA0726; Cs3; CSTN3
1.69778	Smarca4	699.509	119.713	1187.61	60.1923	0.0099468	SMARCA4	Mus musculus SWI/SNF related, matrix associated, actin dependent regulator of chromatin, subfamily a, member 4 (Smarca4), mRNA.	Brg1; HP1-BP72; SW1/SNF; SNF2beta
1.69614	Wdfy3	541.796	108.097	918.96	165.741	0.0450924	WDFY3	Mus musculus WD repeat and FYVE domain containing 3 (Wdfy3), mRNA.	ALFY; mKIAA0993; D5Ertd66e; Ggtb3; 2610509D04Rik; B930017C24; ZFYVE25; AW319683; BWF1; Bchs
1.68694	Msh2	384.484	26.5898	648.603	105.342	0.0344531	MSH2	Mus musculus mutS homolog 2 (E. coli) (Msh2), mRNA.	AI788990
1.68604	Itfg2	376.413	34.1956	634.647	49.0542	0.037166	ITFG2	Mus musculus integrin alpha FG-GAP repeat containing 2 (Itfg2), mRNA.	AI646725; 2700050P07Rik
1.67515	Plekha6	1217.32	225.861	2039.2	135.742	0.00616963	PLEKHA6	Mus musculus pleckstrin homology domain containing, family A member 6 (Plekha6), mRNA.	AU042621; Pepp3
1.67114	Atg2b	1408.09	8.60455	2353.11	405.319	0.0374466	ATG2B	Mus musculus ATG2 autophagy related 2 homolog B (S. cerevisiae) (Atg2b), mRNA.	C630028L02Rik; KIAA4067; 2410024A21Rik; AI503411; AI047755; AW558123; mKIAA4067; C030004M05Rik
1.66883	Akap6	1341.37	142.437	2238.52	448.677	0.00914824	AKAP6	Mus musculus A kinase (PRKA) anchor protein 6 (Akap6), mRNA.	Akapbeta; AI482140; Akapalpha; MGC73457; PRKA
1.6669	Ica1	638.112	124.836	1063.67	65.1771	0.0186442	ICA1	Mus musculus islet cell autoantigen 1 (Ica1), mRNA.	ICA69; 69kDa
1.66255	Srrp	410.036	50.5189	681.705	92.3616	0.0368841	SRRP	Mus musculus serine-arginine repressor protein (Srrp), mRNA.	B830039L16
1.66043	Rex3	4538.9	419.6	7536.52	1448.5	0.00508422	REX3
1.65813	Zfyve27	694.952	61.636	1152.32	84.129	0.00772786	ZFYVE27	Mus musculus zinc finger, FYVE domain containing 27 (Zfyve27), mRNA.	protrudin; AI426636; 9530077C24Rik; 2210011N02Rik; AI593546; AI835681
1.65529	Sharpin	371.534	36.0984	614.996	117.171	0.0482376	SHARPIN	Mus musculus SHANK-associated RH domain interacting protein (Sharpin), mRNA.	RBCKL1; 0610041B22Rik; SIPL1; AW121341
1.6489	Ppfia2	531.435	20.2385	876.282	102.202	0.0166898	PPFIA2	Mus musculus protein tyrosine phosphatase, receptor type, f polypeptide (PTPRF), interacting protein (liprin), alpha 2 (Ppfia2), mRNA.	KIAA4112; 5330438O12; mKIAA4112; E130120L08Rik; B230207K17Rik
1.64584	Clk3	783.985	127.989	1290.32	44.459	0.01164	CLK3	Mus musculus CDC-like kinase 3 (Clk3), mRNA.	MGC103028; MGC36552; AI256811
1.64379	Xlr4a	1575.53	338.205	2589.84	578.765	0.0353571	XLR4A	Mus musculus X-linked lymphocyte-regulated 4A (Xlr4a), mRNA. XM_985903 XM_985942 XM_985977 XM_988796 XM_988827 XM_988867 XM_988909 XM_988942 XM_988983	MGC106987
1.64231	LOC100044257	435.718	20.2425	715.584	30.1347	0.0318111	LOC100044257	PREDICTED: Mus musculus hypothetical protein LOC100044257 (LOC100044257), mRNA.
1.64041	D10Bwg1379e	1360.14	188.017	2231.19	62.4704	0.00423157	D10BWG1379E	Mus musculus DNA segment, Chr 10, Brigham & Women's Genetics 1379 expressed (D10Bwg1379e), mRNA.	B930094H20Rik; mKIAA1244; 9630004D11
1.63761	Ercc5	626.398	5.13875	1025.79	56.4531	0.0134917	ERCC5	Mus musculus excision repair cross-complementing rodent repair deficiency, complementation group 5 (Ercc5), mRNA.	Xpg
1.63427	B230342M21Rik	494.165	85.9645	807.598	19.0299	0.0346955	B230342M21RIK	Mus musculus RIKEN cDNA B230342M21 gene (B230342M21Rik), mRNA.	AI428195
1.6324	LOC100046744	535.264	14.0125	873.763	111.719	0.0201307	LOC100046744	PREDICTED: Mus musculus similar to Serine/arginine repetitive matrix protein 2 (LOC100046744), mRNA.
1.63007	Pi4ka	761.415	65.5023	1241.16	176.304	0.00785929	PI4KA	Mus musculus phosphatidylinositol 4-kinase, catalytic, alpha polypeptide (Pi4ka), mRNA.	Pik4ca
1.62748	5830434P21Rik	2080.8	142.629	3386.46	510.022	0.00140801	5830434P21RIK	Mus musculus RIKEN cDNA 5830434P21 gene (5830434P21Rik), mRNA.	AI173903; D430039P21; mKIAA0515
1.62342	Madd	871.542	95.6203	1414.87	109.797	0.0206072	MADD	Mus musculus MAP-kinase activating death domain (Madd), mRNA.	IG20; 9630059K23Rik
1.61797	Brd9	454.586	14.8437	735.508	27.4206	0.0325824	BRD9	Mus musculus bromodomain containing 9 (Brd9), mRNA.	AL022779
1.60841	Sin3a	422.779	9.82246	680.002	4.70522	0.043686	SIN3A	Mus musculus transcriptional regulator, SIN3A (yeast) (Sin3a), mRNA.	KIAA4126; Sin3; mSin3A; AW553200; mKIAA4126
1.60803	Rgs7	721.985	10.1292	1160.98	32.8745	0.0100014	RGS7	Mus musculus regulator of G protein signaling 7 (Rgs7), mRNA.
1.60799	Ocrl	671.639	30.6775	1079.99	229.592	0.0293313	OCRL	Mus musculus oculocerebrorenal syndrome of Lowe (Ocrl), mRNA.	9530014D17Rik; OCRL1; BB143339
1.60643	Srrm2	2278.79	146.862	3660.73	412.655	0.0011476	SRRM2	Mus musculus serine/arginine repetitive matrix 2 (Srrm2), mRNA.	5033413A03Rik; mKIAA0324; AA410130
1.5925	Grb10	2053.31	543.646	3269.89	613.193	0.037903	GRB10
1.59213	Hdgfrp2	971.917	25.3635	1547.41	213.121	0.00580348	HDGFRP2	Mus musculus hepatoma-derived growth factor, related protein 2 (Hdgfrp2), mRNA.	HRP-2
1.58607	Ell3	695.53	12.9802	1103.16	231.363	0.0306867	ELL3	Mus musculus elongation factor RNA polymerase II-like 3 (Ell3), mRNA.	A930015D22Rik; MGC31450
1.58455	Supt6h	1345.6	14.6057	2132.16	271.74	0.00348558	SUPT6H	Mus musculus suppressor of Ty 6 homolog (S. cerevisiae) (Supt6h), mRNA.	5131400N11Rik; mKIAA0162; AI132449; SPT6
1.58273	Dnmt1	1780.46	283.157	2817.99	391.179	0.00794138	DNMT1	Mus musculus DNA methyltransferase (cytosine-5) 1 (Dnmt1), mRNA.	MommeD2; Met-1; Dnmt; Dnmt1o; Met1; Cxxc9; MTase
1.58065	9330186A19Rik	1777.51	169.56	2809.63	343.851	0.00370284	9330186A19RIK
1.58	A630042L21Rik	2589.79	91.0166	4091.86	97.5129	0.00180845	A630042L21RIK	Mus musculus RIKEN cDNA A630042L21 gene (A630042L21Rik), transcript variant 2, mRNA.	2510002C16Rik; AI413166; mKIAA0194
1.57071	Sdad1	611.182	50.685	959.991	77.7844	0.0224545	SDAD1	Mus musculus SDA1 domain containing 1 (Sdad1), mRNA.	AA591032; 4931421J16; AW538460
1.56952	Ubr1	629.755	49.0989	988.413	214.736	0.044756	UBR1
1.56802	Sf3b3	570.583	4.1962	894.686	62.1807	0.02631	SF3B3	Mus musculus splicing factor 3b, subunit 3 (Sf3b3), mRNA.	SAP130; AA409318; D8Ertd633e; 5730409A01Rik; RSE1; 1810061H24Rik; mKIAA0017
1.56578	Atg16l1	535.759	29.6822	838.88	84.8447	0.0315379	ATG16L1	Mus musculus autophagy-related 16-like 1 (yeast) (Atg16l1), transcript variant b, mRNA.	WDR30; AI225866; 1500009K01Rik; Atg16l; Apg16l; AI035639
1.56412	Slc6a7	1926.37	258.452	3013.07	561.221	0.0147383	SLC6A7	Mus musculus solute carrier family 6 (neurotransmitter transporter, L-proline), member 7 (Slc6a7), mRNA.	MGC67444; MGC61029; PROT; AW455934
1.56251	Rab9b	2768.1	324.963	4325.18	961.242	0.0312265	RAB9B	Mus musculus RAB9B, member RAS oncogene family (Rab9b), mRNA.	MGC130383; 9330195C02Rik
1.56066	Skiv2l	1318.07	82.4828	2057.06	150.668	0.0443652	SKIV2L
1.55687	Camsap1l1	969.102	147.258	1508.77	149.694	0.0168678	CAMSAP1L1	Mus musculus calmodulin regulated spectrin-associated protein 1-like 1 (Camsap1l1), mRNA.	4930541M15Rik; mKIAA1078; 1600013L13Rik
1.54669	Ndn	4679.88	391.599	7238.35	1563.4	0.0251966	NDN	Mus musculus necdin (Ndn), mRNA.	Peg6; AI528698
1.54271	Herpud1	2268.65	176.639	3499.86	570.759	0.00882437	HERPUD1	Mus musculus homocysteine-inducible, endoplasmic reticulum stress-inducible, ubiquitin-like domain member 1 (Herpud1), mRNA.	Herp; SUP
1.53719	6330569M22Rik	1333.25	91.8746	2049.45	276.858	0.00652195	6330569M22RIK	Mus musculus RIKEN cDNA 6330569M22 gene (6330569M22Rik), mRNA.	MGC38111; 6530401O14Rik
1.52993	Rsn	3497.16	35.5169	5350.41	1020.08	0.0119103	RSN
1.52314	Setx	1791.99	41.8794	2729.44	7.94266	0.00493141	SETX	Mus musculus senataxin (Setx), mRNA.	mKIAA0625; A130090N03; Sen1; SCAR1; AOA2; Als4; A930037J23Rik; AW060766
1.52208	LOC100043671	1422.12	48.0248	2164.59	37.5695	0.00654285	LOC100043671	PREDICTED: Mus musculus hypothetical protein LOC100043671 (LOC100043671), mRNA.
1.52033	Kif5a	2822.05	25.2458	4290.44	189.167	0.00994991	KIF5A	Mus musculus kinesin family member 5A (Kif5a), transcript variant 1, mRNA.	Kns; D10Bwg0738e; mKIAA4086; KIAA4086; Kif5
1.51939	Usp20	1813.71	112.9	2755.73	352.801	0.0054032	USP20	Mus musculus ubiquitin specific peptidase 20 (Usp20), mRNA.	Vdu2; AI467231; 1700055M05Rik
1.5171	Appbp1	871.198	159.868	1321.69	29.5884	0.0434061	APPBP1	Mus musculus amyloid beta precursor protein binding protein 1 (Appbp1), mRNA.	59kDa; MGC36437; MGC36630; MGC29435
1.51592	Rogdi	983.723	93.4232	1491.24	296.718	0.0320733	ROGDI	Mus musculus rogdi homolog (Drosophila) (Rogdi), mRNA.	Lzf; AU020118; C76152; 0610011C19Rik
1.51196	BC037034	2134.3	229.421	3226.97	55.7446	0.00806858	BC037034	Mus musculus cDNA sequence BC037034 (BC037034), mRNA.	MGC47434
1.50685	Stat5b	645.152	14.2685	972.146	106.243	0.0326273	STAT5B	Mus musculus signal transducer and activator of transcription 5B (Stat5b), mRNA.
1.50214	Tcfe3	650.399	41.861	976.991	135.258	0.0333654	TCFE3	Mus musculus transcription factor E3 (Tcfe3), mRNA.	Tfe-3; AI851540; Tfe3; F830016E06Rik
1.49804	Smg6	905.261	166.755	1356.12	162.411	0.0402267	SMG6	Mus musculus Smg-6 homolog, nonsense mediated mRNA decay factor (C. elegans) (Smg6), mRNA.	AI317223; RP23-143A14.6; AU041178; MGC7717
1.494	D14Ertd171e	2355.77	522.543	3519.52	628.317	0.0464632	D14ERTD171E
1.49171	0610007P22Rik	2350.13	177.935	3505.71	649.41	0.0169882	0610007P22RIK	Mus musculus RIKEN cDNA 0610007P22 gene (0610007P22Rik), mRNA.	AL022759; MGC113771; 1110014B11Rik
1.48867	Cdc2l1	700.888	20.1808	1043.39	35.9986	0.0459844	CDC2L1	Mus musculus cell division cycle 2-like 1 (Cdc2l1), mRNA.	Cdc2l2; CDK11-p110; CDK11-p58; p58; CDK11-p46; AA989746
1.48643	Bex1	3440.73	0.139092	5114.42	1087.86	0.0326945	BEX1	Mus musculus brain expressed gene 1 (Bex1), mRNA.	AA407839; Rex3; MGC107097; AU018692; Bex4
1.48258	Psmd1	1126.09	40.1756	1669.52	337.944	0.03582	PSMD1	Mus musculus proteasome (prosome, macropain) 26S subunit, non-ATPase, 1 (Psmd1), mRNA.	S1; 2410026J11Rik; P112
1.48244	Zbtb24	603.564	5.15221	894.745	126.006	0.0462731	ZBTB24	Mus musculus zinc finger and BTB domain containing 24 (Zbtb24), mRNA.	Bif1; ZNF450; Bsg1; BC055367
1.4808	Bbs4	1506.95	80.4412	2231.5	452.138	0.03146	BBS4	Mus musculus Bardet-Biedl syndrome 4 (human) (Bbs4), mRNA.	AW537059; AW742241; D9Ertd464e
1.48051	AI314180	1208.99	43.9823	1789.92	314.004	0.017224	AI314180	Mus musculus expressed sequence AI314180 (AI314180), mRNA.	AW558785; KIAA0368; BB181316; RP23-211P15.1; mKIAA0368
1.48003	Usp7	651.832	34.0165	964.731	58.2781	0.0401127	USP7	Mus musculus ubiquitin specific peptidase 7 (Usp7), mRNA.	AU019296; AW548146; AA409944; Hausp; 2210010O09Rik; AA617399; C80752
1.47289	D16H22S680E	1941.81	271.482	2860.07	180.439	0.0187184	D16H22S680E	Mus musculus DNA segment, Chr 16, human D22S680E, expressed (D16H22S680E), mRNA.	T10
1.47186	Rab3gap1	2731.3	14.0394	4020.09	103.21	0.00663453	RAB3GAP1	Mus musculus RAB3 GTPase activating protein subunit 1 (Rab3gap1), mRNA.	4732493F09Rik; 1700003B17Rik; Rab3gap; AL117896
1.46941	Paf1	1351.26	127.848	1985.56	123.188	0.0470441	PAF1	Mus musculus Paf1, RNA polymerase II associated factor, homolog (S. cerevisiae) (Paf1), mRNA.	FLJ11123; 5730511K23Rik; MGC102062; AA675045
1.46834	Gm347	1577.82	270.565	2316.77	313.222	0.0304816	GM347	Mus musculus gene model 347, (NCBI) (Gm347), mRNA.	MGC99945; mKIAA0649
1.46578	LOC100047369	2798.93	69.3128	4102.61	361.322	0.00657495	LOC100047369	PREDICTED: Mus musculus similar to 0610007P22Rik protein (LOC100047369), misc RNA.
1.4653	Camta2	2026.66	66.0618	2969.66	295.042	0.00879312	CAMTA2	Mus musculus calmodulin binding transcription activator 2 (Camta2), mRNA.	mKIAA0909; RP23-326P7.7; Kiaa0909-hp
1.46388	Ap3d1	1291.07	115.321	1889.97	199.1	0.0176097	AP3D1	Mus musculus adaptor-related protein complex 3, delta 1 subunit (Ap3d1), mRNA.	Ap3d; mh; mocha; Bolvr; mBLVR1; AA407035
1.4512	Pom121	1153.45	130.117	1673.88	309.047	0.0395058	POM121	Mus musculus nuclear pore membrane protein 121 (Pom121), mRNA.	mKIAA0618; 2610027A18Rik; C80273
1.45107	Prpf6	2823.63	141.141	4097.28	582.993	0.00843468	PRPF6	Mus musculus PRP6 pre-mRNA splicing factor 6 homolog (yeast) (Prpf6), mRNA.	2610031L17Rik; ANT-1; U5-102K; MGC11655; 1190003A07Rik; MGC38351; MGC36967
1.4509	Sf4	1141.79	120.161	1656.62	191.942	0.0260252	SF4	Mus musculus splicing factor 4 (Sf4), mRNA.	5730496N02Rik
1.43958	Tpr	829.014	32.5841	1193.43	26.0158	0.0373327	TPR	Mus musculus translocated promoter region (Tpr), mRNA.	C77892; 2610029M07Rik
1.43597	Gria2	1790.43	49.3653	2571	377.673	0.0494319	GRIA2
1.42702	Atxn2	1924.96	101.665	2746.97	29.298	0.0144703	ATXN2	Mus musculus ataxin 2 (Atxn2), mRNA.	AW544490; ATX2; 9630045M23Rik; Sca2
1.42564	LOC216443	1290.07	15.952	1839.17	44.6462	0.0218357	LOC216443
1.41946	2410002F23Rik	1347.73	55.8506	1913.06	68.0849	0.0475347	2410002F23RIK	Mus musculus RIKEN cDNA 2410002F23 gene (2410002F23Rik), mRNA.
1.41819	Epb4.1l1	2036.16	156.749	2887.66	214.292	0.0196614	EPB4.1L1	Mus musculus erythrocyte protein band 4.1-like 1 (Epb4.1l1), transcript variant 1, mRNA.	4.1N; mKIAA0338; NBL1
1.41523	Statip1	1759.27	190.187	2489.78	45.1545	0.0267099	STATIP1	Mus musculus signal transducer and activator of transcription interacting protein 1 (Statip1), mRNA.	Elp2; StIP1; AU023723
1.41397	Fxyd6	6003.86	516.013	8489.29	1536.33	0.0305801	FXYD6	Mus musculus FXYD domain-containing ion transport regulator 6 (Fxyd6), mRNA.	0610030I18Rik; Php
1.41295	Elp2	1680.59	135.019	2374.59	62.0269	0.0225704	ELP2	Mus musculus elongation protein 2 homolog (S. cerevisiae) (Elp2), mRNA.	Statip1; Epl2; StIP1; AU023723
1.40661	Ihpk1	2117.51	70.5696	2978.52	394.769	0.0172194	IHPK1	Mus musculus inositol hexaphosphate kinase 1 (Ihpk1), mRNA.	InsP6; AU022776; Itpk6; 1200016D08Rik
1.4055	Arhgap26	1696.75	40.1738	2384.79	275.8	0.0206685	ARHGAP26	Mus musculus Rho GTPase activating protein 26 (Arhgap26), mRNA.	1810044B20Rik; mKIAA0621; AI853435; 4933432P15Rik; 2610010G17Rik
1.4049	2700087H15Rik	1951.35	120.016	2741.45	152.558	0.0195443	2700087H15RIK
1.39988	Cd200	1539.17	87.3714	2154.64	314.507	0.0284687	CD200
1.39803	H2-Ke6	1463.89	114.478	2046.57	0.537512	0.0293204	H2-KE6	Mus musculus H2-K region expressed gene 6 (H2-Ke6), mRNA.	MGC107650; D17H6S112E; Ke6; H-2Ke6; Ring2
1.39352	Lmnb2	1478.35	128.233	2060.1	166.674	0.0323288	LMNB2	Mus musculus lamin B2 (Lmnb2), mRNA.
1.3912	Ncoa5	1394.55	104.142	1940.1	165.055	0.0322444	NCOA5	Mus musculus nuclear receptor coactivator 5 (Ncoa5), mRNA.	CIA; MGC28864
1.39027	Sltm	1162.94	128.085	1616.8	128.467	0.0345486	SLTM	Mus musculus SAFB-like, transcription modulator (Sltm), transcript variant 1, mRNA.	5730455C01Rik; 5730555F13Rik; Met; 9130215G10Rik
1.38824	Tubb2a	4086.69	520.342	5673.32	494.785	0.0323466	TUBB2A	Mus musculus tubulin, beta 2a (Tubb2a), mRNA.	M(beta)2; Tubb2
1.38699	Ddx25	2784.04	137.89	3861.43	584.071	0.018757	DDX25	Mus musculus DEAD (Asp-Glu-Ala-Asp) box polypeptide 25 (Ddx25), mRNA.	AW047046; GRTH
1.38532	Ylpm1	1236.07	40.8426	1712.34	216.375	0.0355146	YLPM1	Mus musculus YLP motif containing 1 (Ylpm1), mRNA.	Zap3; ZAP; A930013E17Rik; AI851834
1.38235	Camk2b	2239.01	4.71954	3095.11	577.244	0.044284	CAMK2B	Mus musculus calcium/calmodulin-dependent protein kinase II, beta (Camk2b), mRNA.	MGC90738; Camk2d
1.37947	Gap43	3360.78	512.225	4636.08	61.6464	0.0472458	GAP43	Mus musculus growth associated protein 43 (Gap43), mRNA.	Basp2; B-50; GAP-43
1.37874	Nisch	5211.9	317.282	7185.83	746.658	0.0186473	NISCH	Mus musculus nischarin (Nisch), mRNA.	1200007D05Rik; 3202002H23Rik; AW494485; I-1
1.37658	Nol10	1069.65	80.3027	1472.46	231.288	0.0492589	NOL10	Mus musculus nucleolar protein 10 (Nol10), mRNA.	MGC113734; Gm67
1.37608	Cadps	1441.23	46.933	1983.25	210.205	0.0334627	CADPS	Mus musculus Ca2+-dependent secretion activator (Cadps), transcript variant 2, mRNA.	mKIAA1121; AU067781; CAPS; CAPS1; MGC90712
1.37474	Anapc4	2629.99	233.058	3615.55	117.307	0.0292144	ANAPC4	Mus musculus anaphase promoting complex subunit 4 (Anapc4), mRNA.	APC4; D5Ertd249e; 2610306D21Rik
1.36323	Rbm4b	1205.29	85.0795	1643.09	271.09	0.0486755	RBM4B	Mus musculus RNA binding motif protein 4B (Rbm4b), mRNA.	4921506I22Rik; AI504630; AI506404; Lark2; MGC115931
1.3622	Mgrn1	2471.03	46.7143	3366.03	579.072	0.0366739	MGRN1	Mus musculus mahogunin, ring finger 1 (Mgrn1), mRNA.	md; mKIAA0544; 2610042J20Rik; nc; N28182
1.35909	Usp47	1195.02	11.5485	1624.14	115.14	0.0486157	USP47	Mus musculus ubiquitin specific peptidase 47 (Usp47), mRNA.	MGC118655; A630020C16Rik; 4930502N04Rik
1.35841	Casc3	2515.71	133.096	3417.37	2.27179	0.0280652	CASC3	Mus musculus cancer susceptibility candidate 3 (Casc3), mRNA.	Mln51; Btz
1.34652	C130022K22Rik	1432.15	48.2305	1928.42	175.079	0.046559	C130022K22RIK	Mus musculus RIKEN cDNA C130022K22 gene (C130022K22Rik), mRNA.
1.33165	Smarca2	3459.36	68.6226	4606.65	27.2359	0.0459706	SMARCA2	Mus musculus SWI/SNF related, matrix associated, actin dependent regulator of chromatin, subfamily a, member 2 (Smarca2), transcript variant 1, mRNA.	SNF2alpha; brahma; Snf2l2; brm; 2610209L14Rik
1.3247	Dusp26	3945.89	131.888	5227.12	331.225	0.0359218	DUSP26	Mus musculus dual specificity phosphatase 26 (putative) (Dusp26), mRNA.	2310043K02Rik; Skrp3
1.32347	Maged1	4622.22	112.072	6117.35	751.565	0.0352131	MAGED1	Mus musculus melanoma antigen, family D, 1 (Maged1), mRNA.	FLJ00163; 5430405L04Rik; Dlixin; 2810433C11Rik; DXBwg1492e; NRAGE; Dlxin1; mFLJ00163; Dlxin-1
1.31971	Slc12a5	6135.07	206.392	8096.51	596.561	0.0351987	SLC12A5	Mus musculus solute carrier family 12, member 5 (Slc12a5), mRNA.	KCC2; mKIAA1176
1.3169	Immt	2374.06	69.4196	3126.41	312.526	0.0469343	IMMT	Mus musculus inner membrane protein, mitochondrial (Immt), nuclear gene encoding mitochondrial protein, mRNA.	1700082C19Rik; D830041H16Rik; HMP; P87/89; P89; P87
1.30419	Tmem132a	3789.12	21.6976	4941.73	458.931	0.0478169	TMEM132A	Mus musculus transmembrane protein 132A (Tmem132a), mRNA.	Hspa5bp1; 6720481D13Rik; Orai1; R74613
1.30315	Rangap1	5873.25	197.366	7653.73	943.093	0.0435906	RANGAP1	Mus musculus RAN GTPase activating protein 1 (Rangap1), mRNA.	mKIAA1835; Fug1; C79654
1.29924	Fam171a2	5598.38	139.109	7273.62	60.8967	0.0460818	FAM171A2	Mus musculus family with sequence similarity 171, member A2 (Fam171a2), mRNA.	RP23-226P4.5
0.798686	LOC546015	9532.19	220.595	7613.23	633.491	0.000122492	LOC546015	PREDICTED: Mus musculus similar to ribosomal protein S9 (LOC546015), misc RNA.
0.792171	Picalm	2647.51	13.6092	2097.28	323.507	0.0471506	PICALM
0.789722	Atp1b3	7202.18	516.714	5687.72	894.295	0.0411016	ATP1B3	Mus musculus ATPase, Na+/K+ transporting, beta 3 polypeptide (Atp1b3), mRNA.	AW212096; AI664000; AA409958
0.789554	Pfdn2	9478.81	704.302	7484.03	913.756	0.0412758	PFDN2	Mus musculus prefoldin 2 (Pfdn2), mRNA.	W48336; ESTM27
0.786431	Marcks	6431.75	203.584	5058.13	889.858	0.0406955	MARCKS	Mus musculus myristoylated alanine rich protein kinase C substrate (Marcks), mRNA.	PKCSL; Macs
0.78526	Sdhd	4231.4	31.2111	3322.75	165.61	0.0289657	SDHD	Mus musculus succinate dehydrogenase complex, subunit D, integral membrane protein (Sdhd), nuclear gene encoding mitochondrial protein, mRNA.	C78570; PRO19626; AVLL5809; 3110001M13Rik
0.783108	2010107E04Rik	5492.64	318.422	4301.33	542.957	0.0284131	2010107E04RIK	Mus musculus RIKEN cDNA 2010107E04 gene (2010107E04Rik), mRNA.	AU043134; 9430003J03Rik; AV124504
0.782177	Serinc3	2252.63	62.6492	1761.95	115.528	0.0414413	SERINC3	Mus musculus serine incorporator 3 (Serinc3), mRNA.	Tde1; AA960047; TMS-1; DIFF33; AIGP1; AA959945
0.781217	Cntn1	4271.77	277.308	3337.18	530.916	0.0326279	CNTN1
0.781027	Vti1b	3160.83	4.4963	2468.7	50.2799	0.0322214	VTI1B	Mus musculus vesicle transport through interaction with t-SNAREs 1B homolog (Vti1b), mRNA.	Vti1-rp1; GES30; SNARE; AU015348; MVti1b
0.778526	Cox5b	9345.25	81.9976	7275.52	55.2422	0.0179873	COX5B
0.777808	Ssr3	5961.35	196.374	4636.79	101.367	0.0197048	SSR3	Mus musculus signal sequence receptor, gamma (Ssr3), mRNA.	AL022999; AW553833; TRAPG; 0610038P07Rik; AU022074
0.772997	Deb1	1594.74	4.58087	1232.73	57.0719	0.0497585	DEB1	Mus musculus differentially expressed in B16F10 1 (Deb1), mRNA.	AI463209; 1110020I04Rik
0.772769	Tmem50a	2737.32	156.021	2115.31	238.849	0.0286407	TMEM50A	Mus musculus transmembrane protein 50A (Tmem50a), mRNA.	Smp1; RP23-79J18.2; CAM; 3200001F09Rik
0.772576	Stau2	2275.77	127.891	1758.2	14.2252	0.0330564	STAU2	Mus musculus staufen (RNA binding protein) homolog 2 (Drosophila) (Stau2), transcript variant 3, mRNA.
0.772074	Btbd1	2438.28	194.744	1882.53	199.674	0.0432656	BTBD1	Mus musculus BTB (POZ) domain containing 1 (Btbd1), mRNA.	1190005H08Rik; MGC37676
0.771818	Gnb2l1	2843.65	255.423	2194.78	236.049	0.0458713	GNB2L1	Mus musculus guanine nucleotide binding protein (G protein), beta polypeptide 2 like 1 (Gnb2l1), mRNA.	Rack1; p205; Gnb2-rs1; GB-like; AL033335
0.770964	Mrps18c	2403.29	41.4725	1852.85	249.64	0.0282835	MRPS18C	Mus musculus mitochondrial ribosomal protein S18C (Mrps18c), nuclear gene encoding mitochondrial protein, mRNA.	1110037D14Rik
0.767524	Rer1	1970.89	74.6833	1512.7	167.676	0.0348808	RER1	Mus musculus RER1 retention in endoplasmic reticulum 1 homolog (S. cerevisiae) (Rer1), mRNA.	AU043380; 5830454N22Rik; 1110060F11Rik
0.766426	BC031181	3152.27	78.3268	2415.98	116.725	0.019008	BC031181	Mus musculus cDNA sequence BC031181 (BC031181), mRNA.
0.763965	Diablo	1869.51	161.342	1428.24	168.752	0.0485986	DIABLO	Mus musculus diablo homolog (Drosophila) (Diablo), nuclear gene encoding mitochondrial protein, mRNA.	AU040403; Smac; 0610041G12Rik
0.761985	Abcd3	2016.69	73.0457	1536.68	117.152	0.0268648	ABCD3	Mus musculus ATP-binding cassette, sub-family D (ALD), member 3 (Abcd3), mRNA.	AU018866; Pxmp1; AI313901; PMP68; AW146054; PMP70
0.75954	1810020D17Rik	1589.39	10.3208	1207.21	154.323	0.0359183	1810020D17RIK	Mus musculus RIKEN cDNA 1810020D17 gene (1810020D17Rik), mRNA.	1810037D19Rik
0.7585	Cox4i1	6012.45	195.063	4560.45	521.898	0.00963121	COX4I1
0.756792	Sdhc	4091.2	58.2784	3096.19	343.583	0.00583643	SDHC	Mus musculus succinate dehydrogenase complex, subunit C, integral membrane protein (Sdhc), nuclear gene encoding mitochondrial protein, mRNA.	AU019277; AI316496; MGC103103; 0610010E03Rik
0.756244	Polr1d	1401.73	54.0042	1060.05	2.32808	0.0436233	POLR1D	Mus musculus polymerase (RNA) I polypeptide D (Polr1d), transcript variant 2, mRNA.	AU018636; MGC107156; 16kDa; mRPA16; 1110003G10Rik; C81327
0.755931	Sec61g	1742.91	44.7244	1317.52	87.6184	0.028112	SEC61G	Mus musculus SEC61, gamma subunit (Sec61g), mRNA.
0.755185	Slc6a1	2256.53	18.1263	1704.1	270.014	0.0188379	SLC6A1	Mus musculus solute carrier family 6 (neurotransmitter transporter, GABA), member 1 (Slc6a1), mRNA. XM_976103	GABATR; Gabt; Gat1; Xtrp1; GABATHG; A730043E01; Gabt1; XT-1
0.754516	Atp1a1	2447.9	94.4819	1846.98	79.4461	0.0166199	ATP1A1	Mus musculus ATPase, Na+/K+ transporting, alpha 1 polypeptide (Atp1a1), mRNA.	Atpa-1; MGC38419; BC010319
0.754294	Usmg5	4268.91	425.735	3220.01	425.901	0.0300861	USMG5	Mus musculus upregulated during skeletal muscle growth 5 (Usmg5), mRNA.	2010301L15Rik
0.752171	Cox6b1	5779.83	488.555	4347.42	458.928	0.00492784	COX6B1	Mus musculus cytochrome c oxidase, subunit VIb polypeptide 1 (Cox6b1), mRNA.	2010000G05Rik; Cox6b
0.750661	Rgs10	7514.53	469.769	5640.87	91.676	0.00937345	RGS10	Mus musculus regulator of G-protein signalling 10 (Rgs10), mRNA.	MGC129414; 2310010N19Rik
0.746666	Ppt1	2026.93	8.47919	1513.44	167.001	0.0168311	PPT1	Mus musculus palmitoyl-protein thioesterase 1 (Ppt1), mRNA.	CLN1; 9530043G02Rik; MGC107420; D4Ertd184e; INCL; AA960502; C77813; PPT
0.744514	Ckb	17573.5	956.146	13083.8	1212.06	0.00511539	CKB	Mus musculus creatine kinase, brain (Ckb), mRNA.	B-CK; Ck-3
0.743041	Dnajc3	2503.62	70.4377	1860.29	45.3685	0.0109367	DNAJC3	Mus musculus DnaJ (Hsp40) homolog, subfamily C, member 3 (Dnajc3), mRNA.	MGC6474; mp58; AU067833; Dnajc3b; Prkri; p58; p58IPK; Dnajc3; AA408985
0.742469	Rps11	3339.48	81.145	2479.46	387.941	0.00762155	RPS11	Mus musculus ribosomal protein S11 (Rps11), mRNA.
0.741876	Hadhb	1219.46	90.8504	904.686	24.3496	0.0455151	HADHB	Mus musculus hydroxyacyl-Coenzyme A dehydrogenase/3-ketoacyl-Coenzyme A thiolase/enoyl-Coenzyme A hydratase (trifunctional protein), beta subunit (Hadhb), nuclear gene encoding mitochondrial protein, mRNA.	4930479F15Rik; Mtpb
0.741216	Clint1	2688	188.78	1992.38	54.8417	0.0138884	CLINT1	Mus musculus clathrin interactor 1 (Clint1), mRNA.	mKIAA0171; KIAA0171; AI642036; Enth; F630206G17Rik; C530049I24Rik; Epn4; RP23-298M7.4; AW537616
0.740431	Map1lc3b	3493.37	242.852	2586.6	59.7764	0.0107379	MAP1LC3B	Mus musculus microtubule-associated protein 1 light chain 3 beta (Map1lc3b), mRNA.	1010001C15Rik; MGC118046; Map1lc3
0.738998	Rap1b	4656.4	617.674	3441.07	519.392	0.0406505	RAP1B	Mus musculus RAS related protein 1b (Rap1b), mRNA.	2810443E11Rik
0.738714	2610204K14Rik	1860.37	213.173	1374.28	59.6555	0.0431479	2610204K14RIK	Mus musculus RIKEN cDNA 2610204K14 gene (2610204K14Rik), mRNA.	2410047I02Rik
0.738324	Ywhaq	1701.64	183.412	1256.36	48.7673	0.0415916	YWHAQ	Mus musculus tyrosine 3-monooxygenase/tryptophan 5-monooxygenase activation protein, theta polypeptide (Ywhaq), mRNA.	AU021156; R74690; MGC118161; AA409740; 14-3-3theta; RP23-402H11.1; 2700028P07Rik
0.737893	Cetn3	3738.94	21.6558	2758.94	118.326	0.0056869	CETN3	Mus musculus centrin 3 (Cetn3), mRNA.	MmCEN3
0.737822	Lman2	2831.14	167.523	2088.87	406.886	0.021659	LMAN2	Mus musculus lectin, mannose-binding 2 (Lman2), mRNA.	GP36B; 1300009F09Rik; AA408240; AU040819; VIP36; AL023023; 1110003H06Rik
0.737587	Hip2	2298.54	215.883	1695.38	101.338	0.023864	HIP2
0.737381	Ndufb4	3481.44	17.727	2567.15	409.512	0.00596998	NDUFB4	Mus musculus NADH dehydrogenase (ubiquinone) 1 beta subcomplex 4 (Ndufb4), nuclear gene encoding mitochondrial protein, mRNA.	0610006N12Rik; 1300010H20Rik
0.736885	Ndufs6	4312.91	89.3761	3178.12	591.794	0.0121951	NDUFS6	Mus musculus NADH dehydrogenase (ubiquinone) Fe-S protein 6 (Ndufs6), mRNA.	MGC107676; IP13; BC059730
0.734743	Rab5c	6201.78	684.676	4556.72	74.4522	0.0209054	RAB5C	Mus musculus RAB5C, member RAS oncogene family (Rab5c), mRNA.	AI326010; Rabl
0.734166	Rpl9	2919.96	55.5621	2143.74	17.1081	0.00641888	RPL9	Mus musculus ribosomal protein L9 (Rpl9), mRNA.	MGC102393
0.734086	Nsbp1	2772.45	326.548	2035.21	348.145	0.0344976	NSBP1	Mus musculus nucleosome binding protein 1 (Nsbp1), mRNA.	NBP-45; MGC103386; GARP45
0.731757	Cnbp	1935.09	118.315	1416.01	229.688	0.0129141	CNBP	Mus musculus cellular nucleic acid binding protein (Cnbp), mRNA.	Znf9; AA408710; Cnbp1
0.730414	Ptp4a2	1888.01	42.7747	1379.03	152.296	0.0145211	PTP4A2	Mus musculus protein tyrosine phosphatase 4a2 (Ptp4a2), mRNA.	MGC102154; Prl-2; MGC103400
0.729116	Cox7b	4977.77	419.337	3629.37	71.5178	0.00897493	COX7B	Mus musculus cytochrome c oxidase subunit VIIb (Cox7b), nuclear gene encoding mitochondrial protein, mRNA.	1100001F07Rik; MGC107263; C80563; 1110004F07Rik
0.727409	Klhl2	2062.74	75.3487	1500.46	246.288	0.0086098	KLHL2	Mus musculus kelch-like 2, Mayven (Drosophila) (Klhl2), mRNA.	Mav; AU020744; KIAA4249; ABP-KELCH; 6030411N21Rik; mKIAA4249
0.726992	Pik3r1	2818.97	294.92	2049.37	208.87	0.0266224	PIK3R1	Mus musculus phosphatidylinositol 3-kinase, regulatory subunit, polypeptide 1 (p85 alpha) (Pik3r1), transcript variant 2, mRNA.	p55alpha; AA414921; PI3K; p50alpha; p85alpha; C530050K14
0.726758	LOC100046044	4940.7	297.904	3590.69	649.203	0.00845042	LOC100046044	PREDICTED: Mus musculus similar to COUP-TFI (LOC100046044), mRNA.
0.725861	LOC677317	2514.57	322.891	1825.23	201.617	0.0342589	LOC677317	PREDICTED: Mus musculus similar to Mod1 protein, transcript variant 4 (LOC677317), mRNA.
0.725646	Scg3	1991.84	62.5218	1445.37	182.864	0.00865831	SCG3	Mus musculus secretogranin III (Scg3), mRNA.	AI385542; Chgd; SgIII; 1B1075
0.72451	Mrps33	1988.63	152.659	1440.78	384.566	0.0240477	MRPS33	Mus musculus mitochondrial ribosomal protein S33 (Mrps33), nuclear gene encoding mitochondrial protein, transcript variant 2, mRNA.	Gdap3; CGI-139; PTD003; AI841153; MRP-S33; MGC106490
0.72297	Cmpk	2999.13	223.702	2168.28	468.512	0.0277099	CMPK	Mus musculus cytidylate kinase (Cmpk), mRNA.	UMP-CMPk; 0610011D08Rik
0.72236	Tmem65	1361.22	27.4742	983.295	183.294	0.0226491	TMEM65	Mus musculus transmembrane protein 65 (Tmem65), mRNA.	2610029O13Rik; 4930438D12Rik
0.722043	Tpd52	2460.71	112.886	1776.74	35.0193	0.00683749	TPD52	Mus musculus tumor protein D52 (Tpd52), transcript variant 3, mRNA.	mD52; AI043038
0.721237	LOC100047490	2056.56	2.39096	1483.27	191.82	0.00694592	LOC100047490	PREDICTED: Mus musculus similar to putative oral cancer suppressor (LOC100047490), mRNA.
0.718145	H2afz	2853.92	60.3774	2049.53	489.939	0.0304816	H2AFZ	Mus musculus H2A histone family, member Z (H2afz), mRNA.	H2A.Z
0.716272	LOC100047615	5131.94	39.9122	3675.86	832.778	0.0189551	LOC100047615	PREDICTED: Mus musculus similar to 40S ribosomal protein S17 (LOC100047615), misc RNA.
0.716232	Extl2	3251.13	95.5282	2328.56	343.062	0.00261863	EXTL2	Mus musculus exostoses (multiple)-like 2 (Extl2), mRNA.	3000001D04Rik; AW146439
0.716182	Ddit4	3837.88	138.18	2748.61	195.785	0.00212502	DDIT4	Mus musculus DNA-damage-inducible transcript 4 (Ddit4), mRNA.	Rtp801; REDD1; 5830413E08Rik; dig2; AA415483
0.71613	Hmgn3	970.131	92.4601	694.739	33.8652	0.0426521	HMGN3	Mus musculus high mobility group nucleosomal binding domain 3 (Hmgn3), transcript variant 2, mRNA.	HMGN3b; TRIP7; 1110002A15Rik; HMGN3a; BB071015; 6330514M13Rik
0.715981	Lsm2	1469.8	44.0053	1052.35	97.7885	0.0389523	LSM2	Mus musculus LSM2 homolog, U6 small nuclear RNA associated (S. cerevisiae) (Lsm2), mRNA.	SmX5; D17H6S56E-2; G7b; snRNP; Dmapl; D17H6S56E2; Sm-X5; MGC13889; Dmpkap
0.71581	Phyh	1122.23	90.1722	803.303	145.531	0.0328254	PHYH	Mus musculus phytanoyl-CoA hydroxylase (Phyh), mRNA.	AI256161; PAHX; AI265699; Lnap1
0.71579	Ndufa4	6415.02	677.74	4591.8	1069.61	0.0427057	NDUFA4	Mus musculus NADH dehydrogenase (ubiquinone) 1 alpha subcomplex, 4 (Ndufa4), mRNA.	MLRQ
0.715286	Ids	1751.51	111.144	1252.83	50.8095	0.0462521	IDS	Mus musculus iduronate 2-sulfatase (Ids), transcript variant 1, mRNA.	AW214631
0.715001	Rps25	2360.45	38.2972	1687.72	331.574	0.0111022	RPS25	Mus musculus ribosomal protein S25 (Rps25), mRNA.	2810009D21Rik
0.713893	Hsd17b7	2785.23	29.3327	1988.36	210.013	0.00297757	HSD17B7	Mus musculus hydroxysteroid (17-beta) dehydrogenase 7 (Hsd17b7), mRNA.	AI266814
0.712636	Tmem111	1125.04	48.2387	801.746	10.4368	0.0286429	TMEM111	Mus musculus transmembrane protein 111 (Tmem111), mRNA.	0610039A15Rik; AI225901; AW260416
0.71135	Adora1	1020.78	72.1974	726.13	125.301	0.0372986	ADORA1	Mus musculus adenosine A1 receptor (Adora1), transcript variant 1, mRNA.	A1AR; A1R; BB176431; AI848715
0.711326	Sec11c	4871.89	380.107	3465.5	648.439	0.00903046	SEC11C	Mus musculus SEC11 homolog C (S. cerevisiae) (Sec11c), mRNA.	1810029G24Rik; Sec11l3
0.710276	Rab7	1686.6	36.9615	1197.95	204.058	0.00181792	RAB7	Mus musculus RAB7, member RAS oncogene family (Rab7), mRNA.	MGC102153
0.710192	Hibadh	1500.07	19.9043	1065.34	209.7	0.0170158	HIBADH	Mus musculus 3-hydroxyisobutyrate dehydrogenase (Hibadh), mRNA.	AI265272; 6430402H10Rik
0.708867	Idi1	3188.5	24.9863	2260.22	165.323	0.00191986	IDI1	Mus musculus isopentenyl-diphosphate delta isomerase (Idi1), transcript variant 2, mRNA.	MGC118013; 4832416K17Rik; MGC8139
0.707785	Hspe1	3254.71	266.491	2303.63	551.104	0.0312773	HSPE1	Mus musculus heat shock protein 1 (chaperonin 10) (Hspe1), mRNA.	mt-cpn10; MGC117526; 10kDa
0.707569	l7Rn6	853.693	28.7728	604.046	111.29	0.0464602	L7RN6	Mus musculus lethal, Chr 7, Rinchik 6 (l7Rn6), mRNA.	0610007P06Rik; l(7)6Rn; 1110002N09Rik
0.706724	Rhob	2434.37	170.399	1720.43	464.544	0.0477703	RHOB	Mus musculus ras homolog gene family, member B (Rhob), mRNA.	Arh6; AA017882; MGC117867; Arhb
0.705999	Rpl12	3626.3	481.499	2560.17	546.12	0.0411989	RPL12	Mus musculus ribosomal protein L12 (Rpl12), mRNA.	MGC102573; E430018F03; MGC102182
0.705347	Rps14	8422.86	89.4168	5941.04	809.272	0.000659593	RPS14	Mus musculus ribosomal protein S14 (Rps14), mRNA.	MGC86125; AL023078; 2600014J02Rik
0.703464	Hmgn2	2741.56	331.312	1928.59	181.203	0.0159524	HMGN2	Mus musculus high mobility group nucleosomal binding domain 2 (Hmgn2), mRNA.	MGC103384; MGC102472; MGC103137; MGC118420; Hmg17; HMG-17
0.701168	Rpl7a	1630.08	51.6556	1142.96	189.575	0.00591927	RPL7A	Mus musculus ribosomal protein L7a (Rpl7a), mRNA.	Surf-3; MGC103146; Surf3
0.699445	Actr2	2307.5	3.46587	1613.97	237.286	0.0022875	ACTR2	Mus musculus ARP2 actin-related protein 2 homolog (yeast) (Actr2), mRNA.	MGC36604; D6Ertd746e; 4921510D23Rik; Arp2; AA409782
0.697056	H3f3b	4072.53	274.273	2838.78	506.834	0.00307671	H3F3B	Mus musculus H3 histone, family 3B (H3f3b), mRNA.	H3.3B; 9430068D06Rik
0.694587	Rpa1	1644.56	137.091	1142.29	145.868	0.00871774	RPA1	Mus musculus replication protein A1 (Rpa1), mRNA.	Rpa; 70kDa; 5031405K23Rik; AW557552; AA589576; RF-A; RP-A
0.694253	Tceb1	2770.73	168.003	1923.59	111.743	0.0016879	TCEB1	Mus musculus transcription elongation factor B (SIII), polypeptide 1 (Tceb1), mRNA.	AI987979; AA407206; AW049146; 2610043E24Rik; 2610301I15Rik
0.694071	Eif3h	1008.96	48.6187	700.292	42.5234	0.0212234	EIF3H	Mus musculus eukaryotic translation initiation factor 3, subunit H (Eif3h), mRNA.	EIF3-P40; MGC107627; EIF3-gamma; Eif3s3; 9430017H16Rik; 40kD; 1110008A16Rik
0.692615	Ndufa3	2423.1	57.0555	1678.27	434.87	0.0247948	NDUFA3	Mus musculus NADH dehydrogenase (ubiquinone) 1 alpha subcomplex, 3 (Ndufa3), mRNA.	1010001M12Rik; 1700022J01Rik
0.692189	Ier3ip1	1179.16	128.286	816.201	78.0433	0.0264908	IER3IP1	Mus musculus immediate early response 3 interacting protein 1 (Ier3ip1), mRNA.	1110057H19Rik; AI644142; AL022863; AV026606; AL022842
0.691075	Arl3	1795.83	184.129	1241.05	66.3448	0.0154479	ARL3	Mus musculus ADP-ribosylation factor-like 3 (Arl3), mRNA.
0.690814	1110001J03Rik	2189.7	178.474	1512.67	235.636	0.00430705	1110001J03RIK	Mus musculus RIKEN cDNA 1110001J03 gene (1110001J03Rik), mRNA.
0.69013	Mrpl18	1196.41	126.023	825.682	22.2937	0.0313997	MRPL18	Mus musculus mitochondrial ribosomal protein L18 (Mrpl18), nuclear gene encoding mitochondrial protein, mRNA.	HSPC071; MRP-L18; 1010001C05Rik; C79879
0.686028	Nacc2	3188.73	173.481	2187.55	127.887	0.00195918	NACC2	Mus musculus nucleus accumbens associated 2, BEN and BTB (POZ) domain containing (Nacc2), transcript variant 2, mRNA.	0610020I02Rik; AI448087; C030048H19Rik
0.684949	Ndufa9	2034.32	198.171	1393.41	277.994	0.0125722	NDUFA9	Mus musculus NADH dehydrogenase (ubiquinone) 1 alpha subcomplex, 9 (Ndufa9), mRNA.	1010001N11Rik
0.683923	2700094K13Rik	2150	183.089	1470.44	335.176	0.0166863	2700094K13RIK	Mus musculus RIKEN cDNA 2700094K13 gene (2700094K13Rik), transcript variant 2, mRNA.	Selh
0.683674	Sdcbp	1679.16	3.4596	1148	301.361	0.018339	SDCBP	Mus musculus syndecan binding protein (Sdcbp), transcript variant 1, mRNA.	Sycl
0.683097	2310016M24Rik	2108.1	99.6696	1440.04	289.827	0.00471003	2310016M24RIK	Mus musculus RIKEN cDNA 2310016M24 gene (2310016M24Rik), mRNA.	MGC106475; AA959804
0.682452	Etfb	2813.4	156.174	1920.01	545.912	0.0328731	ETFB	Mus musculus electron transferring flavoprotein, beta polypeptide (Etfb), mRNA.	2810441H06Rik; 0610009I16Rik
0.680951	Vps29	1106.56	140.129	753.512	118.792	0.0437165	VPS29	Mus musculus vacuolar protein sorting 29 (S. pombe) (Vps29), mRNA.	PEP11; AW049835; 2010015D08Rik
0.680471	Lsm3	1053.99	20.2559	717.209	53.2224	0.0130843	LSM3	Mus musculus LSM3 homolog, U6 small nuclear RNA associated (S. cerevisiae) (Lsm3), mRNA.	USS2; 1010001J12Rik; SMX4; 6030401D18Rik
0.679161	Mrpl33	968.978	15.2128	658.092	131.561	0.0354902	MRPL33	Mus musculus mitochondrial ribosomal protein L33 (Mrpl33), nuclear gene encoding mitochondrial protein, mRNA.	0610009M10Rik
0.679119	Degs1	3781.18	135.691	2567.87	729.439	0.0245378	DEGS1	Mus musculus degenerative spermatocyte homolog 1 (Drosophila) (Degs1), mRNA.	Mdes; Des1; Degs; AA536663
0.677171	Rps6	720.265	55.0323	487.743	35.2108	0.0479945	RPS6	Mus musculus ribosomal protein S6 (Rps6), mRNA.	MGC103209; MGC102571
0.676988	Tmem38b	1298.88	24.7854	879.328	101.397	0.0127505	TMEM38B	Mus musculus transmembrane protein 38B (Tmem38b), mRNA.	AV051057; 1600017F22Rik; AA437809; D4Ertd89e; TRIC-B; mg33b
0.675492	Hey1	1940.36	88.192	1310.7	107.945	0.00127084	HEY1	Mus musculus hairy/enhancer-of-split related with YRPW motif 1 (Hey1), mRNA.	AI316788; HRT1; Hesr1; hesr-1; Herp2; AI414254
0.675456	0610007P14Rik	754.99	20.2382	509.963	88.8602	0.0378237	0610007P14RIK	Mus musculus RIKEN cDNA 0610007P14 gene (0610007P14Rik), mRNA.	AU019315; C77855; 1190004E09Rik; ORF11
0.675439	Rab33b	834.947	6.17539	563.956	130.353	0.0412524	RAB33B	Mus musculus RAB33B, member of RAS oncogene family (Rab33b), mRNA.
0.674209	Bola2	2547.3	109.598	1717.41	24.0848	0.000541318	BOLA2	Mus musculus bolA-like 2 (E. coli) (Bola2), mRNA.	1110025L05Rik; BolA-2
0.673961	Rpl30	1204.3	22.1299	811.648	111.513	0.00663089	RPL30	Mus musculus ribosomal protein L30 (Rpl30), mRNA.	MGC106425; MGC107559
0.67237	Robld3	3564.25	52.6014	2396.49	383.144	0.000229589	ROBLD3	Mus musculus roadblock domain containing 3 (Robld3), mRNA.	2010111E04Rik; Rab25; AL022628; P14
0.672112	4833439L19Rik	1225.57	87.2215	823.722	45.7358	0.0117128	4833439L19RIK	Mus musculus RIKEN cDNA 4833439L19 gene (4833439L19Rik), mRNA.	C81457; 4930558H15Rik
0.671322	Ddah2	743.426	4.2808	499.078	47.0011	0.0370212	DDAH2	Mus musculus dimethylarginine dimethylaminohydrolase 2 (Ddah2), mRNA.	AU019324; NG30; G6a; 1110003M04Rik; Ddah; AW413173
0.670904	Spg20	738.761	68.6008	495.638	73.2629	0.0455551	SPG20
0.670048	LOC100044779	4715.18	49.4207	3159.4	399.747	0.000125507	LOC100044779	PREDICTED: Mus musculus similar to prothymosin alpha (LOC100044779), misc RNA.
0.669755	Shisa4	1106.3	72.7244	740.949	31.2158	0.00892042	SHISA4	Mus musculus shisa homolog 4 (Xenopus laevis) (Shisa4), mRNA.	mShisa4; 9330132O05Rik
0.669531	Scn1b	690.483	28.2737	462.3	18.5658	0.0459184	SCN1B	Mus musculus sodium channel, voltage-gated, type I, beta (Scn1b), mRNA.
0.668318	Atp5j2	5817.69	1.27993	3888.06	238.363	8.59985e-05	ATP5J2	Mus musculus ATP synthase, H+ transporting, mitochondrial F0 complex, subunit f, isoform 2 (Atp5j2), nuclear gene encoding mitochondrial protein, mRNA.	1110019H14Rik
0.666811	Ufc1	698.556	35.8526	465.805	22.1928	0.0422707	UFC1	Mus musculus ubiquitin-fold modifier conjugating enzyme 1 (Ufc1), mRNA.	AA062310; 1110021H02Rik; ESTM29
0.666284	Ppp1cb	3169.99	633.861	2112.11	350.007	0.0358423	PPP1CB
0.666041	LOC100048613	10205.6	544.12	6797.36	840.356	7.02582e-05	LOC100048613	PREDICTED: Mus musculus similar to cytochrome c oxidase, subunit VIIc, transcript variant 1 (LOC100048613), mRNA.
0.662512	Ndufa5	2117.62	312.876	1402.94	232.173	0.0207283	NDUFA5	Mus musculus NADH dehydrogenase (ubiquinone) 1 alpha subcomplex, 5 (Ndufa5), nuclear gene encoding mitochondrial protein, mRNA.	2900002J19Rik
0.662473	2310016E02Rik	1646.88	116.139	1091.01	257.853	0.0108936	2310016E02RIK	Mus musculus RIKEN cDNA 2310016E02 gene (2310016E02Rik), transcript variant 1, mRNA.
0.661798	Slc30a4	947.494	46.5728	627.049	59.3895	0.0122737	SLC30A4	Mus musculus solute carrier family 30 (zinc transporter), member 4 (Slc30a4), mRNA.	lm; Znt4
0.661678	Anapc13	4393.78	386.271	2907.27	970.881	0.0457256	ANAPC13	Mus musculus anaphase promoting complex subunit 13 (Anapc13), mRNA.	SWM1; 1810004D07Rik; APC13
0.661603	Timm8b	1614	23.6358	1067.83	146.22	0.00276608	TIMM8B	Mus musculus translocase of inner mitochondrial membrane 8 homolog b (yeast) (Timm8b), mRNA.	Tim8b
0.661431	Atp5j	2415.25	222.096	1597.52	156.161	0.00669147	ATP5J	Mus musculus ATP synthase, H+ transporting, mitochondrial F0 complex, subunit F (Atp5j), nuclear gene encoding mitochondrial protein, mRNA.
0.660961	Bzw1	1375	14.2759	908.82	156.626	0.00252223	BZW1
0.660569	Ndufa13	6056.38	124.793	4000.66	391.385	4.77502e-05	NDUFA13	Mus musculus NADH dehydrogenase (ubiquinone) 1 alpha subcomplex, 13 (Ndufa13), mRNA.	CDA016; Grim19; CGI-39; 2700054G14Rik; GRIM-19; AU022060
0.660506	6720456B07Rik	2053.51	197.738	1356.36	166.212	0.00336012	6720456B07RIK	Mus musculus RIKEN cDNA 6720456B07 gene (6720456B07Rik), mRNA.	AW011779
0.660342	Btg1	2373.34	12.899	1567.22	311.898	0.00196908	BTG1	Mus musculus B-cell translocation gene 1, anti-proliferative (Btg1), mRNA.	AW546738
0.659702	Ube2a	964.485	10.613	636.272	90.761	0.010829	UBE2A	Mus musculus ubiquitin-conjugating enzyme E2A, RAD6 homolog (S. cerevisiae) (Ube2a), mRNA.	HR6A; Mhr6a; HHR6A
0.658806	Rpl37	2614.98	87.6383	1722.76	58.0778	0.0316356	RPL37	Mus musculus ribosomal protein L37 (Rpl37), mRNA.	3110005M08Rik
0.658787	Ndufb9	2627.92	316.257	1731.24	282.366	0.00448918	NDUFB9	Mus musculus NADH dehydrogenase (ubiquinone) 1 beta subcomplex, 9 (Ndufb9), mRNA.	1190008J14Rik
0.65798	1810035L17Rik	1397.31	93.1664	919.404	263.827	0.00710126	1810035L17RIK	Mus musculus RIKEN cDNA 1810035L17 gene (1810035L17Rik), mRNA.
0.65755	LOC654426	2905.48	428.72	1910.5	45.5813	0.0101768	LOC654426	Mus musculus ATP synthase, H+ transporting, mitochondrial F0 complex, subunit F pseudogene (LOC654426), non-coding RNA.
0.657307	Phpt1	1302.18	52.4475	855.936	224.177	0.0180551	PHPT1	Mus musculus phosphohistidine phosphatase 1 (Phpt1), mRNA.	1700008C22Rik; Php14
0.657214	Ndufa2	2799.61	38.1457	1839.94	585.182	0.0273029	NDUFA2	Mus musculus NADH dehydrogenase (ubiquinone) 1 alpha subcomplex, 2 (Ndufa2), mRNA.	AV000592; B8; C1-B8
0.65559	Nrn1	1790.29	328.942	1173.7	98.1986	0.0316628	NRN1	Mus musculus neuritin 1 (Nrn1), mRNA.	0710008J23Rik; Nrn; MGC40786; cpg15
0.654596	Gabarap	2290.7	8.16562	1499.48	466.238	0.0243651	GABARAP	Mus musculus gamma-aminobutyric acid receptor associated protein (Gabarap), mRNA.
0.653677	2510040D07Rik	1030.61	61.2927	673.684	133.242	0.00873154	2510040D07RIK
0.653398	Actr3	1810.82	250.538	1183.19	121.111	0.0103564	ACTR3	Mus musculus ARP3 actin-related protein 3 homolog (yeast) (Actr3), mRNA.	1200003A09Rik; Arp3; MGC118188
0.65245	Dynlt3	4699.16	523.563	3065.97	28.4108	0.00161036	DYNLT3	Mus musculus dynein light chain Tctex-type 3 (Dynlt3), mRNA.	AU042796; Tcte1l; 2310075M16Rik
0.650369	Tmem56	1137.12	21.461	739.548	133.758	0.00404646	TMEM56	Mus musculus transmembrane protein 56 (Tmem56), mRNA.	C730036B01Rik; AW109744; 4930577M16Rik; AU018104
0.649787	Rgs8	1961.2	263.475	1274.37	295.713	0.0192512	RGS8	Mus musculus regulator of G-protein signaling 8 (Rgs8), mRNA.	6530413N01Rik
0.649191	4631427C17Rik	1172.46	150.519	761.15	12.2209	0.0150676	4631427C17RIK	Mus musculus RIKEN cDNA 4631427C17 gene (4631427C17Rik), mRNA.	AI227036; KIAA0828; mKIAA0828
0.648212	Spry2	1294.97	46.7238	839.418	192.767	0.00751842	SPRY2	Mus musculus sprouty homolog 2 (Drosophila) (Spry2), mRNA.	sprouty2
0.647855	Srr	852.487	135.388	552.288	64.5182	0.045326	SRR	Mus musculus serine racemase (Srr), mRNA.	Srs
0.646987	Ndufb3	1725.69	105.622	1116.5	233.605	0.00248141	NDUFB3	Mus musculus NADH dehydrogenase (ubiquinone) 1 beta subcomplex 3 (Ndufb3), mRNA.	2700033I16Rik; AI415450
0.645678	Frzb	681.644	29.4031	440.123	16.892	0.0323461	FRZB	Mus musculus frizzled-related protein (Frzb), mRNA.	Sfrp3; frezzled; fritz; Frp; frzb-1
0.64512	Atp1b2	5360.18	755.597	3457.96	933.859	0.0259055	ATP1B2	Mus musculus ATPase, Na+/K+ transporting, beta 2 polypeptide (Atp1b2), mRNA.	Atpb-2; Amog
0.644441	Dnajb9	2353.18	259.768	1516.48	70.9031	0.00213042	DNAJB9	Mus musculus DnaJ (Hsp40) homolog, subfamily B, member 9 (Dnajb9), mRNA.	AA673481; AW556981; mDj7; AA408011; Mdg1; AA673251; ERdj4
0.643115	0610007C21Rik	1404.69	26.9576	903.378	95.8806	0.00514976	0610007C21RIK	Mus musculus RIKEN cDNA 0610007C21 gene (0610007C21Rik), transcript variant 2, mRNA.	AI316792; HSPC013; Apr3; p18
0.640906	Errfi1	778.112	84.6535	498.697	22.8979	0.0274715	ERRFI1	Mus musculus ERBB receptor feedback inhibitor 1 (Errfi1), mRNA.	Mig-6; 1300002F13Rik; Mig6; AI788755; RALT
0.640258	Rpl36al	5993.62	259.37	3837.46	369.949	1.02337e-05	RPL36AL	Mus musculus ribosomal protein L36a-like (Rpl36al), mRNA.	RPL36A; 2410038A03Rik
0.638864	1810046J19Rik	2363.62	68.767	1510.03	140.722	9.39211e-05	1810046J19RIK	Mus musculus RIKEN cDNA 1810046J19 gene (1810046J19Rik), mRNA.	Rdx12; AI463380
0.63773	Dbp	751.296	38.5767	479.124	95.8852	0.0193068	DBP	Mus musculus D site albumin promoter binding protein (Dbp), mRNA.
0.634549	Itgb1bp1	858.813	68.6616	544.96	89.6301	0.0118821	ITGB1BP1	Mus musculus integrin beta 1 binding protein 1 (Itgb1bp1), mRNA.	AU019480; bodenin; AI449260
0.63422	Sec23ip	1155.43	114.251	732.794	84.6234	0.00555516	SEC23IP	Mus musculus Sec23 interacting protein (Sec23ip), mRNA.	D7Ertd373e
0.634162	Icmt	1741.93	156.019	1104.67	147.03	0.00112952	ICMT	Mus musculus isoprenylcysteine carboxyl methyltransferase (Icmt), mRNA.	C80758; STE14; MGC118506; PPMT; 1700008E11Rik; HSTE14; pcCMT
0.633746	Gclm	1337.37	127.921	847.553	48.9185	0.00310659	GCLM	Mus musculus glutamate-cysteine ligase , modifier subunit (Gclm), mRNA.	Glclr
0.63239	Rpl24	2537.81	131.736	1604.89	321.993	0.000353616	RPL24	Mus musculus ribosomal protein L24 (Rpl24), mRNA.	0610008L05Rik; Bst
0.632257	Lhfpl2	2596.81	163.842	1641.85	608.573	0.0355001	LHFPL2	Mus musculus lipoma HMGIC fusion partner-like 2 (Lhfpl2), mRNA.	6030465B15; mKIAA0206; AI447312; AW050335
0.632075	Sec22b	704.431	22.0925	445.253	122.8	0.0428151	SEC22B	Mus musculus SEC22 vesicle trafficking protein homolog B (S. cerevisiae) (Sec22b), mRNA.	4930564D15Rik; ERS-24; C81333; Sec22l1; AI480645; AA517334
0.631647	2810004N20Rik	1255.7	109.502	793.158	152.251	0.00361231	2810004N20RIK
0.630835	Cd164	1785	3.90514	1126.04	115.228	0.000203122	CD164	Mus musculus CD164 antigen (Cd164), mRNA.	AA589639; A115; MGC-24; MSSP; A24; AW540279
0.630144	Hspa2	2076.22	47.2654	1308.32	332.782	0.0106727	HSPA2	Mus musculus heat shock protein 2 (Hspa2), transcript variant 1, mRNA.	MGC7795; HSP70.2; 70kDa; MGC58299; HSP70A2; Hsp70-2
0.630078	Tm9sf3	577.327	26.6415	363.761	41.7687	0.0484048	TM9SF3	Mus musculus transmembrane 9 superfamily member 3 (Tm9sf3), mRNA.	AI413748; Smbp; AI115521; 1810073M23Rik; KIAA4036; AW549777; 2810031D16Rik; mKIAA4036; AW146116
0.629417	Gmfb	1223.42	141.264	770.043	48.5566	0.0062336	GMFB	Mus musculus glia maturation factor, beta (Gmfb), mRNA.	3110001O16Rik; 3110001H22Rik; C79176; AI851627; D14Ertd630e
0.629406	Zbed3	1619.34	66.5809	1019.22	334.455	0.0209872	ZBED3	Mus musculus zinc finger, BED domain containing 3 (Zbed3), mRNA.	2610005H11Rik; 0610037K01Rik; AU024588; AU018975
0.629334	Nrsn1	981.972	6.31657	617.988	58.9752	0.0043624	NRSN1	Mus musculus neurensin 1 (Nrsn1), mRNA.	Vmp; Neuro-p24; Neurensin-1
0.628726	LOC100044087	2909.67	409.148	1829.38	221.928	0.00361241	LOC100044087	PREDICTED: Mus musculus similar to brain protein 44 (LOC100044087), misc RNA.
0.627807	Plekha3	745.703	111.737	468.158	95.3445	0.0410961	PLEKHA3	Mus musculus pleckstrin homology domain-containing, family A (phosphoinositide binding specific) member 3 (Plekha3), mRNA.	FAPP1
0.627725	D10Ertd322e	1394.95	186.439	875.642	150.444	0.00717771	D10ERTD322E	Mus musculus DNA segment, Chr 10, ERATO Doi 322, expressed (D10Ertd322e), mRNA.	Mrpl42; 2900055D03Rik; 2700009F22Rik
0.625861	Bloc1s1	974.306	13.4312	609.78	196.593	0.0317625	BLOC1S1	Mus musculus biogenesis of lysosome-related organelles complex-1, subunit 1 (Bloc1s1), mRNA.	AI839753; Gcn5l1; BLOS1
0.625697	Fam162a	1101.15	10.4388	688.988	130.17	0.00232886	FAM162A	Mus musculus family with sequence similarity 162, member A (Fam162a), mRNA.
0.625576	Ndufb2	1341.2	51.8443	839.024	247.825	0.0135091	NDUFB2	Mus musculus NADH dehydrogenase (ubiquinone) 1 beta subcomplex, 2 (Ndufb2), mRNA.	AGGG; 8kDa; AI325567; 1810011O01Rik
0.62507	3830406C13Rik	611.633	33.342	382.313	17.9786	0.0389964	3830406C13RIK	Mus musculus RIKEN cDNA 3830406C13 gene (3830406C13Rik), transcript variant 2, mRNA.	MGC36213; AV167947
0.624483	Rps2	1907.65	50.8673	1191.29	365.585	0.0111848	RPS2	Mus musculus ribosomal protein S2 (Rps2), mRNA.	MGC118038; Llrep3; MGC118037
0.624399	Rps5	2257.67	203.355	1409.69	203.173	0.000384209	RPS5	Mus musculus ribosomal protein S5 (Rps5), mRNA.	AA617411
0.624126	Rab10	1249.88	163.126	780.086	10.3841	0.00745086	RAB10	Mus musculus RAB10, member RAS oncogene family (Rab10), mRNA.	AW107754
0.622524	Il6st	959.021	24.2793	597.014	23.2275	0.00405374	IL6ST	Mus musculus interleukin 6 signal transducer (Il6st), mRNA.	gp130; BB405851; CD130; AA389424; 5133400A03Rik; D13Ertd699e
0.622121	Rexo2	645.906	78.0614	401.832	87.5821	0.0158773	REXO2	Mus musculus REX2, RNA exonuclease 2 homolog (S. cerevisiae) (Rexo2), mRNA.	Sfn; Smfn; 1810038D15Rik; AW107347
0.621709	Hmgb1	645.533	40.2575	401.333	37.5068	0.0266902	HMGB1	Mus musculus high mobility group box 1 (Hmgb1), mRNA.	MGC103168; Hmg1; MGC117897; MGC103169; MGC117896
0.620711	2022-09-04	1390.27	244.854	862.956	233.743	0.0385679	2022-09-04	Mus musculus septin 4 (Sept4), mRNA.	Bh5; Pnutl2
0.619576	Uqcr	2913.49	26.8204	1805.13	633.149	0.0178676	UQCR	Mus musculus ubiquinol-cytochrome c reductase (6.4kD) subunit (Uqcr), mRNA.	AL022707; 0710008D09Rik
0.617675	Anp32e	1579.71	266.844	975.746	121.037	0.0122138	ANP32E	Mus musculus acidic (leucine-rich) nuclear phosphoprotein 32 family, member E (Anp32e), mRNA.	AI326868; AI047746; MGC11640; LANP-L; CPD1; 2810018A15Rik; LANPL; mLANP-L
0.617617	LOC100039532	4074.25	105.72	2516.32	229.921	3.33512e-06	LOC100039532	PREDICTED: Mus musculus similar to ribosomal protein L35a (LOC100039532), mRNA.
0.616801	C330021F23Rik	4916.92	72.6113	3032.76	331.873	1.95795e-06	C330021F23RIK	Mus musculus RIKEN cDNA C330021F23 gene (C330021F23Rik), mRNA.	2610027C06Rik
0.616416	Arl2bp	805.055	77.5239	496.249	139.375	0.0419307	ARL2BP	Mus musculus ADP-ribosylation factor-like 2 binding protein (Arl2bp), transcript variant 1, mRNA.	6330544B05Rik; Bart1; 1700027H16Rik; 1700010P10Rik; AI482273; AI849834
0.616068	Cox17	3443.89	142.013	2121.67	116.411	4.85783e-06	COX17	Mus musculus cytochrome c oxidase, subunit XVII assembly protein homolog (yeast) (Cox17), mRNA.	AI037035
0.615549	Lrrn1	1403.15	329.491	863.709	100.264	0.04725	LRRN1	Mus musculus leucine rich repeat protein 1, neuronal (Lrrn1), mRNA.	2810047E21Rik; NLRR-1
0.615368	Mxi1	971.265	36.1353	597.686	35.1491	0.00306009	MXI1	Mus musculus Max interacting protein 1 (Mxi1), transcript variant 3, mRNA.	Mad2
0.615314	Slc25a5	2998.11	75.7214	1844.78	534.255	0.00414758	SLC25A5	Mus musculus solute carrier family 25 (mitochondrial carrier, adenine nucleotide translocator), member 5 (Slc25a5), nuclear gene encoding mitochondrial protein, mRNA.	MGC101927; Ant2
0.613754	Rps3a	4091.51	163.802	2511.18	684.071	0.00201087	RPS3A	Mus musculus ribosomal protein S3a (Rps3a), mRNA.	MGC117914; MGC102469
0.612541	Timm8a1	1585.99	208.8	971.487	119.49	0.003457	TIMM8A1	Mus musculus translocase of inner mitochondrial membrane 8 homolog a1 (yeast) (Timm8a1), mRNA.	Fci-12; Tim8a; Timm8a; DXHXS1274E; Ddp1
0.612386	Fis1	1605.53	131.903	983.204	133.642	0.000933031	FIS1	Mus musculus fission 1 (mitochondrial outer membrane) homolog (yeast) (Fis1), mRNA.	2010003O14Rik; Ttc11
0.612087	Foxn3	3035.05	446.486	1857.71	431.505	0.00854746	FOXN3	Mus musculus forkhead box N3 (Foxn3), mRNA.	5430426H20Rik; AA589593; AW556347; MGC107530; HTLFL1; Ches1; MGC36260; Ches1l
0.611047	Rfk	1247.96	44.4313	762.563	159.946	0.0014056	RFK	Mus musculus riboflavin kinase (Rfk), mRNA.	0610038L10Rik; KOI-4; AF031381
0.609694	LOC100043391	2982.55	6.27202	1818.44	76.2459	4.92755e-06	LOC100043391	PREDICTED: Mus musculus similar to QM protein (LOC100043391), mRNA.
0.609395	Zfand3	1234.47	15.574	752.283	145.714	0.00084783	ZFAND3	Mus musculus zinc finger, AN1-type domain 3 (Zfand3), mRNA.	MGC103362; TEG-27; MGC118625; AW539211; Tex27
0.60931	Igfbp5	608.867	10.6519	370.989	5.19249	0.0277992	IGFBP5	Mus musculus insulin-like growth factor binding protein 5 (Igfbp5), mRNA.	IGFBP-5; AW208790; AI256729
0.609275	Rap2c	1033.32	9.49194	629.575	85.0763	0.00455159	RAP2C	Mus musculus RAP2C, member of RAS oncogene family (Rap2c), mRNA.	2010200P20Rik; AL022976; AI194294
0.608885	Psenen	917.194	5.03039	558.466	206.069	0.0402045	PSENEN	Mus musculus presenilin enhancer 2 homolog (C. elegans) (Psenen), mRNA.	1700023M09Rik; MGC102026
0.607375	Rpl22	684.68	25.5487	415.858	26.9666	0.0158363	RPL22	Mus musculus ribosomal protein L22 (Rpl22), mRNA.	2700038K18Rik
0.606218	Hus1	1657.04	72.1737	1004.53	229.182	0.00336795	HUS1	Mus musculus Hus1 homolog (S. pombe) (Hus1), mRNA.	mHus1
0.605877	Atp5l	1114.91	49.914	675.496	14.3793	0.000978005	ATP5L	Mus musculus ATP synthase, H+ transporting, mitochondrial F0 complex, subunit g (Atp5l), nuclear gene encoding mitochondrial protein, mRNA.	4933437C06Rik; MGC107547; MGC107313
0.60577	E330036I19Rik	798.933	154.506	483.97	7.49442	0.0428702	E330036I19RIK	Mus musculus RIKEN cDNA E330036I19 gene (E330036I19Rik), mRNA.	MGC27690
0.605627	Tspan31	1041.1	131.794	630.517	2.65992	0.00724796	TSPAN31	Mus musculus tetraspanin 31 (Tspan31), mRNA.	Sas; AW742554; 2700085A14Rik
0.605267	Mrps21	993.386	198.077	601.264	76.6482	0.0328936	MRPS21	Mus musculus mitochondrial ribosomal protein S21 (Mrps21), nuclear gene encoding mitochondrial protein, mRNA.	1810031B19Rik
0.605195	Idh1	839.555	23.9383	508.095	59.3661	0.00523358	IDH1	Mus musculus isocitrate dehydrogenase 1 (NADP+), soluble (Idh1), mRNA.	Idh-1; E030024J03Rik; MGC115782; AI788952; IDPc; AI314845; Id-1
0.604219	Sri	630.543	45.6517	380.986	36.1005	0.0246359	SRI	Mus musculus sorcin (Sri), transcript variant 1, mRNA.	Sor; 2210417O06Rik; 2900070H08Rik
0.60213	Ndufb6	2197.77	201.322	1323.35	478.613	0.0222082	NDUFB6	Mus musculus NADH dehydrogenase (ubiquinone) 1 beta subcomplex, 6 (Ndufb6), nuclear gene encoding mitochondrial protein, mRNA.	Gm137
0.600593	Ccnd3	625.315	61.2687	375.56	55.8995	0.0110983	CCND3	Mus musculus cyclin D3 (Ccnd3), transcript variant 1, mRNA.	AA682053; AW146355; 9230106B05Rik; AL024085; C78795
0.600311	Cox6a1	3720.3	240.685	2233.34	660.16	0.0024793	COX6A1	Mus musculus cytochrome c oxidase, subunit VI a, polypeptide 1 (Cox6a1), nuclear gene encoding mitochondrial protein, mRNA.	VIaL
0.600023	Mcee	997.427	18.7362	598.479	183.25	0.0139757	MCEE	Mus musculus methylmalonyl CoA epimerase (Mcee), mRNA.	1110007A04Rik
0.59964	Ccdc12	569.601	78.5597	341.556	13.1908	0.0494256	CCDC12	Mus musculus coiled-coil domain containing 12 (Ccdc12), mRNA.	2700094L05Rik; C76605
0.597432	Etfa	2214.89	143.233	1323.24	171.808	3.18464e-05	ETFA	Mus musculus electron transferring flavoprotein, alpha polypeptide (Etfa), nuclear gene encoding mitochondrial protein, mRNA.	D9Ertd394e; 2010200I21Rik
0.597135	Ephx2	1055.73	248.03	630.415	89.5863	0.0460459	EPHX2	Mus musculus epoxide hydrolase 2, cytoplasmic (Ephx2), mRNA.	AW106936; Eph2
0.5968	Megf9	1444.39	289.605	862.01	61.2665	0.0188912	MEGF9	Mus musculus multiple EGF-like-domains 9 (Megf9), mRNA.	mKIAA0818; 4933405H16Rik; 9630025C07; Egfl5
0.596769	Uqcrfs1	522.399	6.1418	311.751	24.0517	0.0431493	UQCRFS1	Mus musculus ubiquinol-cytochrome c reductase, Rieske iron-sulfur polypeptide 1 (Uqcrfs1), mRNA.	4430402G14Rik; AI875505
0.596692	EG668668	6474.71	386.458	3863.41	55.4964	6.36621e-07	EG668668	Mus musculus predicted gene, EG668668 (EG668668), mRNA.
0.595601	Hbegf	775.283	114.195	461.759	15.4672	0.0209976	HBEGF	Mus musculus heparin-binding EGF-like growth factor (Hbegf), mRNA.	DTS; MGC107656; Dtr; HB-EGF; Hegfl; AW047313
0.595085	2610039C10Rik	949.733	184.684	565.172	127.521	0.0338863	2610039C10RIK	Mus musculus RIKEN cDNA 2610039C10 gene (2610039C10Rik), mRNA.	2810018N07Rik; MGC100039
0.594679	St13	505.14	25.7466	300.396	60.8847	0.0477725	ST13	Mus musculus suppression of tumorigenicity 13 (St13), mRNA.	HOP; SNC6; HSPABP; PRO0786; 3110002K08Rik; HIP; HSPABP1; 1110007I03Rik; p48; AW555194
0.594045	Lsm8	921.438	16.3026	547.375	49.9584	0.00219832	LSM8	Mus musculus LSM8 homolog, U6 small nuclear RNA associated (S. cerevisiae) (Lsm8), mRNA.	2010003I05Rik; AW214405
0.593318	Rps9	2977.81	54.4943	1766.79	121.455	1.01388e-05	RPS9	Mus musculus ribosomal protein S9 (Rps9), mRNA.	AL022771; AL022885; MGC4138; 3010033P07Rik
0.591842	Aph1b	861.5	104.906	509.872	38.7927	0.0090581	APH1B	Mus musculus anterior pharynx defective 1b homolog (C. elegans) (Aph1b), mRNA.	Aph1c; 2310057K14Rik
0.591605	Rps12	1734.01	2.42527	1025.85	469.853	0.0430578	RPS12	Mus musculus ribosomal protein S12 (Rps12), mRNA.	MGC102112; MGC102499; MGC117504; MGC102111
0.591496	Skap2	1924.32	259.402	1138.23	145.189	0.00143155	SKAP2	Mus musculus src family associated phosphoprotein 2 (Skap2), mRNA.	AA960083; RA70; Saps; 2610021A10Rik; BB137539; mSKAP55R; Scap2; SKAP-HOM
0.588721	Ctnna1	2529.06	93.9956	1488.91	44.8759	1.99689e-06	CTNNA1	Mus musculus catenin (cadherin associated protein), alpha 1 (Ctnna1), mRNA.	2010010M04Rik; AA517462; AI988031; Catna1
0.588707	Tspan5	1790.19	37.2945	1053.9	66.7787	1.72928e-05	TSPAN5	Mus musculus tetraspanin 5 (Tspan5), mRNA.	Tm4sf9; NET-4; 4930505M03Rik; AU024142; 2810455A09Rik
0.587509	Serpinf1	2218.89	448.356	1303.62	377.65	0.0307461	SERPINF1	Mus musculus serine (or cysteine) peptidase inhibitor, clade F, member 1 (Serpinf1), mRNA.	Sdf3; AI195227; Pedfl; EPC-1; Pedf
0.587201	LOC381629	1314.33	94.5976	771.777	185.823	0.00155945	LOC381629
0.586234	Rnf5	1204.28	92.9415	705.993	251.306	0.0169799	RNF5	Mus musculus ring finger protein 5 (Rnf5), mRNA.	AA407576; 2410131O05Rik; NG2
0.585915	P2ry1	1546.1	321.997	905.883	251.59	0.0339752	P2RY1	Mus musculus purinergic receptor P2Y, G-protein coupled 1 (P2ry1), mRNA.	P2Y1
0.585749	Cyb5	560.504	40.5349	328.315	94.7351	0.0419383	CYB5	Mus musculus cytochrome b-5 (Cyb5), mRNA.	0610009N12Rik
0.585163	Alg5	702.688	118.692	411.187	23.2517	0.0326094	ALG5	Mus musculus asparagine-linked glycosylation 5 homolog (yeast, dolichyl-phosphate beta-glucosyltransferase) (Alg5), mRNA.	AW545564; AV170001; AV009521; 1500026A19Rik; 2600005J22Rik
0.58496	Rps10	1693.92	5.83086	990.876	28.2316	2.01161e-05	RPS10	Mus musculus ribosomal protein S10 (Rps10), mRNA.	2210402A09Rik; MGC107635
0.582791	Pnrc2	820.6	10.3637	478.239	163.03	0.0214376	PNRC2	Mus musculus proline-rich nuclear receptor coactivator 2 (Pnrc2), mRNA.	MGC11707; D4Bwg0593e; 0610011E17Rik
0.582573	Timp3	2523.36	74.9597	1470.04	686.494	0.00687592	TIMP3	Mus musculus tissue inhibitor of metalloproteinase 3 (Timp3), mRNA.	Timp-3
0.580278	Pfdn5	2292.32	166.001	1330.18	408.176	0.00135907	PFDN5	Mus musculus prefoldin 5 (Pfdn5), mRNA.	MM-1; 1700010A06Rik; Eig1; 1190001O17Rik; D15Ertd697e
0.580061	6330578E17Rik	882.19	120.056	511.724	48.9202	0.0427992	6330578E17RIK	Mus musculus RIKEN cDNA 6330578E17 gene (6330578E17Rik), mRNA.	1700001A24Rik
0.579942	Taf13	5529.21	278.401	3206.62	399.132	4.75705e-08	TAF13	Mus musculus TAF13 RNA polymerase II, TATA box binding protein (TBP)-associated factor (Taf13), mRNA.	TAFII18; AI847295; 2010309N11Rik; 1810004N01Rik
0.579727	LOC100046120	4359.66	199.381	2527.41	177.83	7.14905e-08	LOC100046120	PREDICTED: Mus musculus similar to clusterin (LOC100046120), mRNA.
0.578512	Vps25	814.384	9.67622	471.131	83.4865	0.00279406	VPS25	Mus musculus vacuolar protein sorting 25 (yeast) (Vps25), mRNA.	D11Wsu68e; AW107467; 1110020N13Rik
0.578227	Tceal8	1480.64	74.7754	856.146	335.858	0.0162525	TCEAL8	Mus musculus transcription elongation factor A (SII)-like 8 (Tceal8), mRNA.	3930402F23Rik
0.577713	Pip4k2a	3424.42	395.179	1978.33	379.694	0.000272882	PIP4K2A	Mus musculus phosphatidylinositol-5-phosphate 4-kinase, type II, alpha (Pip4k2a), mRNA.	AW742916
0.577091	Mettl9	595.84	61.203	343.854	16.2184	0.0180427	METTL9	Mus musculus methyltransferase like 9 (Mettl9), mRNA.	0610012D09Rik; Drev; AA517660; MNCb-5680
0.575481	Hexa	4504.35	1236.86	2592.17	147.217	0.0394544	HEXA	Mus musculus hexosaminidase A (Hexa), mRNA.	Hex-1
0.575191	OTTMUSG00000011595	569.715	43.6578	327.695	21.1312	0.0220892	OTTMUSG00000011595	Mus musculus predicted gene, OTTMUSG00000011595 (OTTMUSG00000011595), non-coding RNA. XR_000457 XR_000458 XR_000459
0.575013	Serf2	1651.11	357.162	949.409	100.868	0.0164508	SERF2	Mus musculus small EDRK-rich factor 2 (Serf2), mRNA.	Msmac1l; C80083; m4F5rel
0.574859	Laptm4a	2713.72	37.6044	1560.01	461.872	0.00104927	LAPTM4A	Mus musculus lysosomal-associated protein transmembrane 4A (Laptm4a), mRNA.	MTP; LAPTM4; AA286466; mKIAA0108; Mtrp
0.571558	Abcd2	476.233	3.3953	272.195	33.3646	0.0451227	ABCD2	Mus musculus ATP-binding cassette, sub-family D (ALD), member 2 (Abcd2), mRNA.	ALDR; ABC39; ALDL1; ALDRP
0.571174	Rpl27	3735.23	211.031	2133.47	452.309	1.05967e-05	RPL27	Mus musculus ribosomal protein L27 (Rpl27), mRNA.	MGC103134
0.570709	4931406C07Rik	577.102	82.3815	329.358	73.6954	0.0348485	4931406C07RIK	Mus musculus RIKEN cDNA 4931406C07 gene (4931406C07Rik), mRNA.
0.570177	Sepw1	2745.43	8.36523	1565.38	242.53	2.44216e-07	SEPW1	Mus musculus selenoprotein W, muscle 1 (Sepw1), mRNA.	selW
0.567489	Lgsn	565.166	69.4172	320.726	18.1677	0.036554	LGSN	Mus musculus lengsin, lens protein with glutamine synthetase domain (Lgsn), mRNA.	Gdh-X; Glud; AI118167; Gludl
0.567144	LOC100048187	1630.45	171.896	924.701	135.091	0.000196583	LOC100048187	PREDICTED: Mus musculus similar to ribosomal protein S27 (metallopanstimulin 1) (LOC100048187), mRNA.
0.565982	Sas	903.235	90.4108	511.215	78.6882	0.00245931	SAS
0.565588	Lsm5	1386.99	215.856	784.464	88.3011	0.00296206	LSM5	Mus musculus LSM5 homolog, U6 small nuclear RNA associated (S. cerevisiae) (Lsm5), mRNA.	2310034K10Rik; 2010208O10Rik
0.565573	Tex261	1186.45	37.3373	671.027	79.8924	0.000299551	TEX261	Mus musculus testis expressed gene 261 (Tex261), mRNA.	TEG-261; 3110001O07Rik; AI480706; AA409339; AL033351
0.565072	1810027O10Rik	1772.12	45.6533	1001.37	132.517	3.80391e-06	1810027O10RIK	Mus musculus RIKEN cDNA 1810027O10 gene (1810027O10Rik), mRNA. XM_109683 XM_909001	RP23-422L16.23; 3110009M16Rik
0.565026	Dok4	676.753	77.0618	382.383	44.2868	0.012342	DOK4	Mus musculus docking protein 4 (Dok4), mRNA.
0.564867	Ndufa1	3922.47	106.328	2215.68	379.381	5.21413e-08	NDUFA1	Mus musculus NADH dehydrogenase (ubiquinone) 1 alpha subcomplex, 1 (Ndufa1), nuclear gene encoding mitochondrial protein, mRNA.	MWFE; 1810049F12Rik
0.561883	Cdc42ep4	660.466	19.8997	371.104	57.1048	0.00771667	CDC42EP4	Mus musculus CDC42 effector protein (Rho GTPase binding) 4 (Cdc42ep4), mRNA.	Borg4; 1500041M20Rik; CEP4
0.560848	Ncan	1498.7	120.733	840.544	127.62	5.07574e-05	NCAN	Mus musculus neurocan (Ncan), mRNA.	Tgfbit; C230035B04; Cspg3
0.5589	Hsd17b4	1525.86	302.464	852.8	28.2496	0.00835362	HSD17B4	Mus musculus hydroxysteroid (17-beta) dehydrogenase 4 (Hsd17b4), mRNA.	perMFE-2; MFE-2; Mfp-2; MFP2; AW208803; 17[b]-HSD
0.558824	Supt4h1	638.069	115.511	356.568	30.0732	0.0319874	SUPT4H1	Mus musculus suppressor of Ty 4 homolog 1 (S. cerevisiae) (Supt4h1), mRNA.	AL022777; Supt4h
0.556696	Wdr42a	468.426	2.70024	260.771	69.4873	0.0456215	WDR42A	Mus musculus WD repeat domain 42A (Wdr42a), mRNA.	C76055; AA408877; AA792214; MGC38511; D1Ucla4; H326; AU018973
0.556686	Nudt4	1297.06	169.407	722.054	215.311	0.00684196	NUDT4	Mus musculus nudix (nucleoside diphosphate linked moiety X)-type motif 4 (Nudt4), mRNA.	DIPP2alpha; DIPP2beta; HDCMB47P; 4933436C10Rik; DIPP2
0.556524	Mtap4	826.69	115.84	460.073	42.9387	0.00407844	MTAP4	Mus musculus microtubule-associated protein 4 (Mtap4), mRNA.	MAP4; Mtap-4; AA407148
0.556466	Rps16	980.714	144.422	545.734	55.7753	0.00467681	RPS16	Mus musculus ribosomal protein S16 (Rps16), mRNA.	AA420385; AI317031
0.556087	St6gal1	1499.74	114.03	833.986	373.471	0.0215506	ST6GAL1	Mus musculus beta galactoside alpha 2,6 sialyltransferase 1 (St6gal1), mRNA.	ST6Gal; Cd75; ST6Gal I; AW742324; Siat1; St6Gal-I; MGC116663
0.556018	Itm2b	2750.91	101.927	1529.55	292.73	0.000270312	ITM2B	Mus musculus integral membrane protein 2B (Itm2b), mRNA.	E25BMM; D14Sel6; AI256040
0.55448	Rpl34	2593.65	86.63	1438.13	24.6955	7.88295e-08	RPL34	Mus musculus ribosomal protein L34 (Rpl34), transcript variant 1, mRNA.	1100001I22Rik; RPL34; MGC103270
0.552171	Acbd5	677.12	133.634	373.886	48.1296	0.0442245	ACBD5	Mus musculus acyl-Coenzyme A binding domain containing 5 (Acbd5), mRNA.	1300014E15Rik; MGC90942
0.551756	1500032L24Rik	1233.99	135.326	680.864	216.684	0.00586824	1500032L24RIK	Mus musculus RIKEN cDNA 1500032L24 gene (1500032L24Rik), mRNA.	MGC106724
0.55146	Gyg	729.611	40.5613	402.352	91.3694	0.00449573	GYG	Mus musculus glycogenin (Gyg), mRNA.	AU017667; Gyg1
0.551164	5730469M10Rik	2722.29	371.365	1500.43	19.2616	0.000211855	5730469M10RIK	Mus musculus RIKEN cDNA 5730469M10 gene (5730469M10Rik), mRNA.	AU040822
0.550081	Pigyl	455.886	52.0071	250.774	15.263	0.0483964	PIGYL	Mus musculus phosphatidylinositol glycan anchor biosynthesis, class Y-like (Pigyl), mRNA.	Pigy; 1810008A14Rik; PIG-Y
0.549583	Trem1	459.293	44.972	252.42	49.3327	0.0251416	TREM1	Mus musculus triggering receptor expressed on myeloid cells 1 (Trem1), mRNA.
0.54736	2310003P10Rik	830.507	197.155	454.587	102.546	0.0366663	2310003P10RIK
0.545585	Serpinb8	768.386	94.3163	419.22	50.3313	0.00546138	SERPINB8	Mus musculus serine (or cysteine) peptdiase inhibitor, clade B, member 8 (Serpinb8), mRNA.	CAP-2; ovalbumin; CAP2; Spi8; NK10
0.545585	LOC100047934	1235.9	134.597	674.289	198.762	0.00328094	LOC100047934	PREDICTED: Mus musculus hypothetical protein LOC100047934 (LOC100047934), mRNA.
0.545311	Rab1b	635.924	16.1806	346.776	66.7429	0.00018007	RAB1B	Mus musculus RAB1B, member RAS oncogene family (Rab1b), mRNA.	1110011F09Rik
0.544685	Dr1	589.201	36.5256	320.929	21.7057	0.0107942	DR1	Mus musculus down-regulator of transcription 1 (Dr1), mRNA.	Dr1l; NC2beta; 1700121L09Rik; NC2
0.544451	Bnip3l	1338.78	190.67	728.902	155.166	0.00172989	BNIP3L	Mus musculus BCL2/adenovirus E1B interacting protein 3-like (Bnip3l), mRNA.	C86132; Nip3L; D14Ertd719e; Nix
0.541933	Rbbp9	458.873	62.9698	248.678	44.1674	0.0490816	RBBP9	Mus musculus retinoblastoma binding protein 9 (Rbbp9), mRNA.	Bog
0.541825	Acta2	1089.09	270.074	590.094	17.7284	0.026576	ACTA2	Mus musculus actin, alpha 2, smooth muscle, aorta (Acta2), mRNA.	0610041G09Rik; SMalphaA; a-SMA; Actvs
0.539639	Ramp2	558.875	15.7572	301.59	72.7064	0.0149723	RAMP2	Mus musculus receptor (calcitonin) activity modifying protein 2 (Ramp2), mRNA.
0.539141	Bud31	809.371	18.747	436.365	76.2061	0.00105673	BUD31	Mus musculus BUD31 homolog (yeast) (Bud31), mRNA.	EDG-2; C77604; EDG2; G10
0.538975	Fdx1	520.496	46.2609	280.534	71.3898	0.0239485	FDX1	Mus musculus ferredoxin 1 (Fdx1), nuclear gene encoding mitochondrial protein, mRNA.
0.538879	Rhou	611.031	65.475	329.272	144.448	0.0477141	RHOU	Mus musculus ras homolog gene family, member U (Rhou), mRNA.	Arhu; AI182090; G28K; WRCH1; WRCH-1; CDC42L1; mG28K; 2310026M05Rik
0.538848	Aldh6a1	1309.34	166.063	705.536	174.965	0.00163951	ALDH6A1	Mus musculus aldehyde dehydrogenase family 6, subfamily A1 (Aldh6a1), nuclear gene encoding mitochondrial protein, mRNA.	MGC37325; AI314632; 1110038I05Rik
0.537597	Gprc5b	662.705	109.337	356.268	96.4267	0.0235058	GPRC5B	Mus musculus G protein-coupled receptor, family C, group 5, member B (Gprc5b), mRNA.	AW125761; Raig2
0.53727	Ptn	4115.73	462.221	2211.26	132.98	7.48735e-06	PTN	Mus musculus pleiotrophin (Ptn), mRNA.	Osf-1; Osf1; OSF; HBGF-8; HBNF; HARP; HB-GAM; HBBN
0.537171	Armet	621.489	148.187	333.846	47.0241	0.0486094	ARMET	Mus musculus arginine-rich, mutated in early stage tumors (Armet), mRNA.	AA408789; AA673178; AA407711; 3230402M22Rik; D18Mgi17; D17914
0.535811	Epb4.1l2	1077.21	8.01009	577.183	233.681	0.00941688	EPB4.1L2
0.535723	Tuba8	1777.15	356.446	952.062	375.285	0.0283446	TUBA8	Mus musculus tubulin, alpha 8 (Tuba8), mRNA.
0.535054	Nfix	1099.29	26.7189	588.177	196.13	0.0232558	NFIX	Mus musculus nuclear factor I/X (Nfix), transcript variant 2, mRNA. XM_921228 XM_921240 XM_921250 XM_921261 XM_921270 XM_921288 XM_921293 XM_921299 XM_921300 XM_921307
0.534726	Lmo4	2120.05	660.96	1133.65	97.5856	0.0464755	LMO4	Mus musculus LIM domain only 4 (Lmo4), mRNA.	Etohi4; A730077C12Rik; Crp3
0.532795	Rplp1	7443.3	518.579	3965.76	197.788	3.1733e-09	RPLP1	Mus musculus ribosomal protein, large, P1 (Rplp1), mRNA.	MGC103133; Arpp1; C430017H15Rik; 2410042H16Rik
0.532442	Hist2h2ac	1678.04	180.918	893.458	294.699	0.00252268	HIST2H2AC	Mus musculus histone cluster 2, H2ac (Hist2h2ac), mRNA.	H2a-613b
0.532346	Snx5	496.661	10.6836	264.395	43.0022	0.022849	SNX5	Mus musculus sorting nexin 5 (Snx5), mRNA. XM_001004302	0910001N05Rik; 1810032P22Rik; D2Ertd52e; AU019504
0.532207	Kctd12	1574	23.2115	837.695	70.5032	1.10273e-06	KCTD12	Mus musculus potassium channel tetramerisation domain containing 12 (Kctd12), mRNA.	AW538430; Pfetin; AU046135; Pfet1
0.53182	Snapin	1138.06	75.1864	605.244	52.3417	4.52724e-05	SNAPIN	Mus musculus SNAP-associated protein (Snapin), mRNA.	Snap25bp; AV026596; 25kDa; AA407989
0.531494	Fads1	4277.69	197.33	2273.57	834.261	0.00110749	FADS1	Mus musculus fatty acid desaturase 1 (Fads1), mRNA.	MGC37858; DSD; 0710001O03Rik; AI317215; A930006B21Rik
0.5299	Rps21	7523.06	76.1769	3986.47	199.08	1.6085e-11	RPS21	Mus musculus ribosomal protein S21 (Rps21), mRNA.	2410030A14Rik; MGC107620; 1810049N11Rik
0.529766	Mgl1	1797.7	48.1529	952.361	488.419	0.019836	MGL1	Mus musculus macrophage galactose N-acetyl-galactosamine specific lectin 1 (Mgl1), mRNA.	Mgl
0.52771	Cdc42	521.32	41.9702	275.105	35.7701	0.0120374	CDC42	Mus musculus cell division cycle 42 homolog (S. cerevisiae) (Cdc42), mRNA.	AI747189; AU018915
0.527599	Nras	4345.95	174.578	2292.92	781.958	0.000396791	NRAS	Mus musculus neuroblastoma ras oncogene (Nras), mRNA.	AV095280; N-ras
0.527081	Bmpr1a	611.233	43.3018	322.169	2.58817	0.00569366	BMPR1A	Mus musculus bone morphogenetic protein receptor, type 1A (Bmpr1a), mRNA.	BMPR-IA; Bmpr; AU045487; 1110037I22Rik; ALK3
0.523827	Ppp1r3c	2932.95	45.2383	1536.36	878.451	0.0281078	PPP1R3C	Mus musculus protein phosphatase 1, regulatory (inhibitor) subunit 3C (Ppp1r3c), mRNA.	PTG; Ppp1r5
0.522977	Rasl11b	3284.88	53.6679	1717.92	790.381	0.00758518	RASL11B	Mus musculus RAS-like, family 11, member B (Rasl11b), mRNA.	1190017B18Rik; MGC103217
0.522123	Tmem47	1286.8	249.807	671.87	135.863	0.00644156	TMEM47	Mus musculus transmembrane protein 47 (Tmem47), mRNA.	AI115536; 3010015F07Rik; Tm4sf10; BCMP1
0.522005	LOC100040402	517.368	5.07617	270.069	104.393	0.0360235	LOC100040402	PREDICTED: Mus musculus hypothetical protein LOC100040402 (LOC100040402), mRNA.
0.520807	Atp5g2	1935.11	153.475	1007.82	18.4278	7.5389e-07	ATP5G2	Mus musculus ATP synthase, H+ transporting, mitochondrial F0 complex, subunit c (subunit 9), isoform 2 (Atp5g2), mRNA.	MGC118044; 1810041M08Rik
0.519798	Ctsd	3118.5	576.632	1620.99	299.514	0.00136689	CTSD	Mus musculus cathepsin D (Ctsd), mRNA.	CD; CatD
0.519479	Cat	677.911	89.5164	352.161	65.7419	0.00685147	CAT	Mus musculus catalase (Cat), mRNA.	2210418N07; Cas1; Cas-1; Cs-1
0.519401	Cbwd1	401.759	6.48327	208.674	4.76498	0.0496103	CBWD1	Mus musculus COBW domain containing 1 (Cbwd1), mRNA.	MGC28027; AV349248; MGC59411; BC018472
0.519013	Chst11	672.613	67.9094	349.094	87.5441	0.00591241	CHST11	Mus musculus carbohydrate sulfotransferase 11 (Chst11), mRNA.	C4ST1; C4s; C4ST-1; C4ST; 1110020P09Rik
0.518756	Ndufc2	1424.02	89.043	738.716	390.384	0.0207641	NDUFC2	Mus musculus NADH dehydrogenase (ubiquinone) 1, subcomplex unknown, 2 (Ndufc2), mRNA.	G1; R75094; 2010300P09Rik; 1810004I06Rik
0.517943	Adk	780.006	62.4758	403.998	43.4371	0.00201172	ADK	Mus musculus adenosine kinase (Adk), mRNA.	AI255373; Ak; MGC6593; 5033405D03Rik; AI987814; 2310026J05Rik
0.517309	Atp5e	4259.53	131.431	2203.49	181.452	2.67315e-11	ATP5E	Mus musculus ATP synthase, H+ transporting, mitochondrial F1 complex, epsilon subunit (Atp5e), nuclear gene encoding mitochondrial protein, mRNA.	2410043G19Rik; ATPE; AV000645
0.516471	Slc6a9	2449.07	22.3563	1264.87	424.071	0.00026878	SLC6A9	Mus musculus solute carrier family 6 (neurotransmitter transporter, glycine), member 9 (Slc6a9), mRNA.	Glyt-1; Glyt1
[truncated: 359 more rows]
