# Supplementary figures and images for: Molecular and anatomical characterization of parabrachial neurons and their axonal projections
Source: eLife journal article supplement (doi:10.7554/elife.81868), 2022-11-01

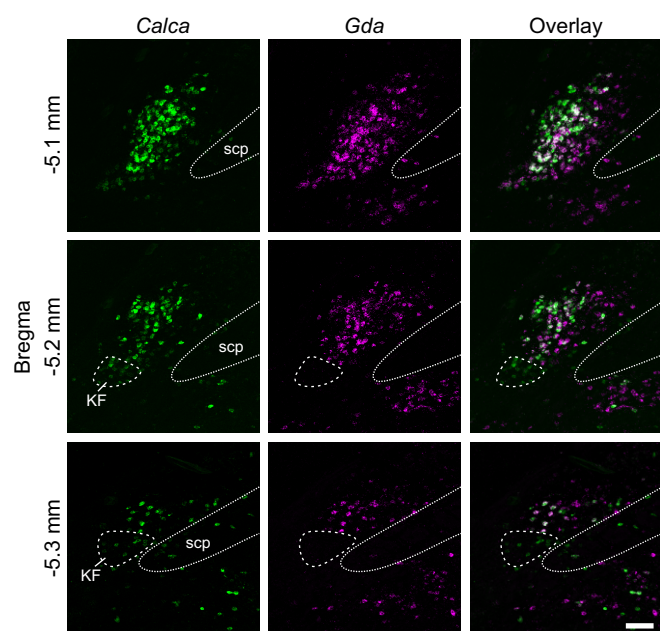

Supplement: supp [file elife-81868-supp-v1.zip]

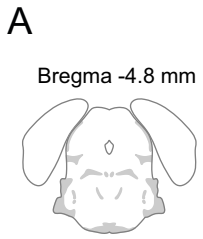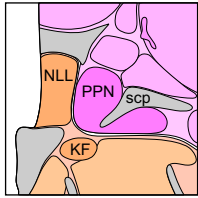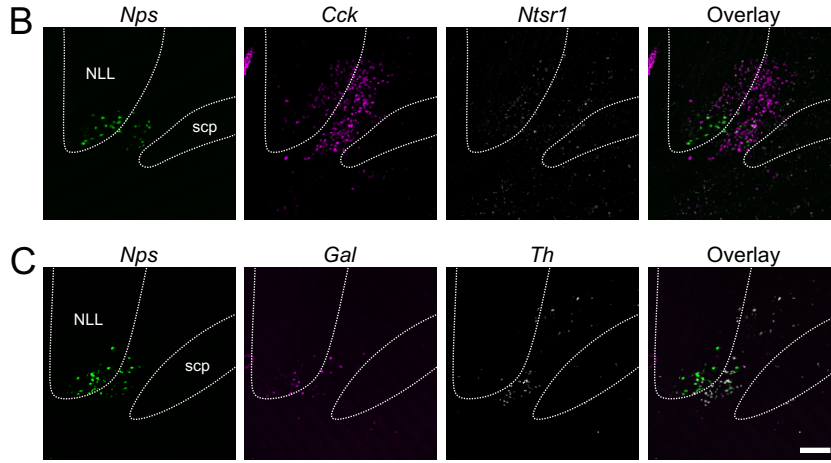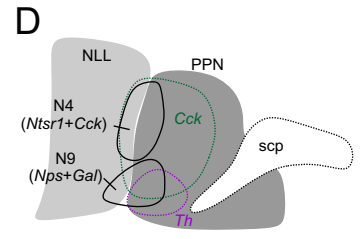

Supplement: supp [file elife-81868-supp-v1.zip]

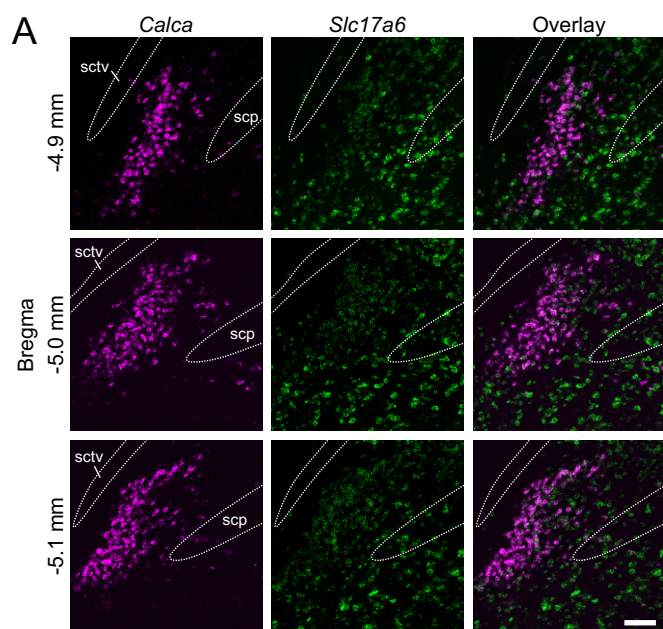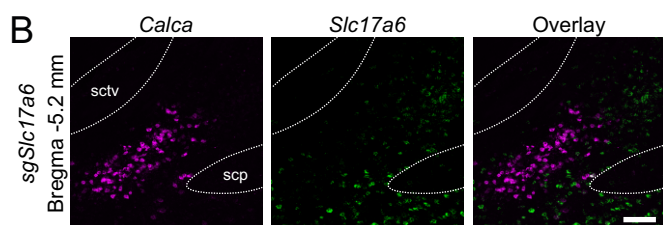

Supplement: supp [file elife-81868-supp-v1.zip]

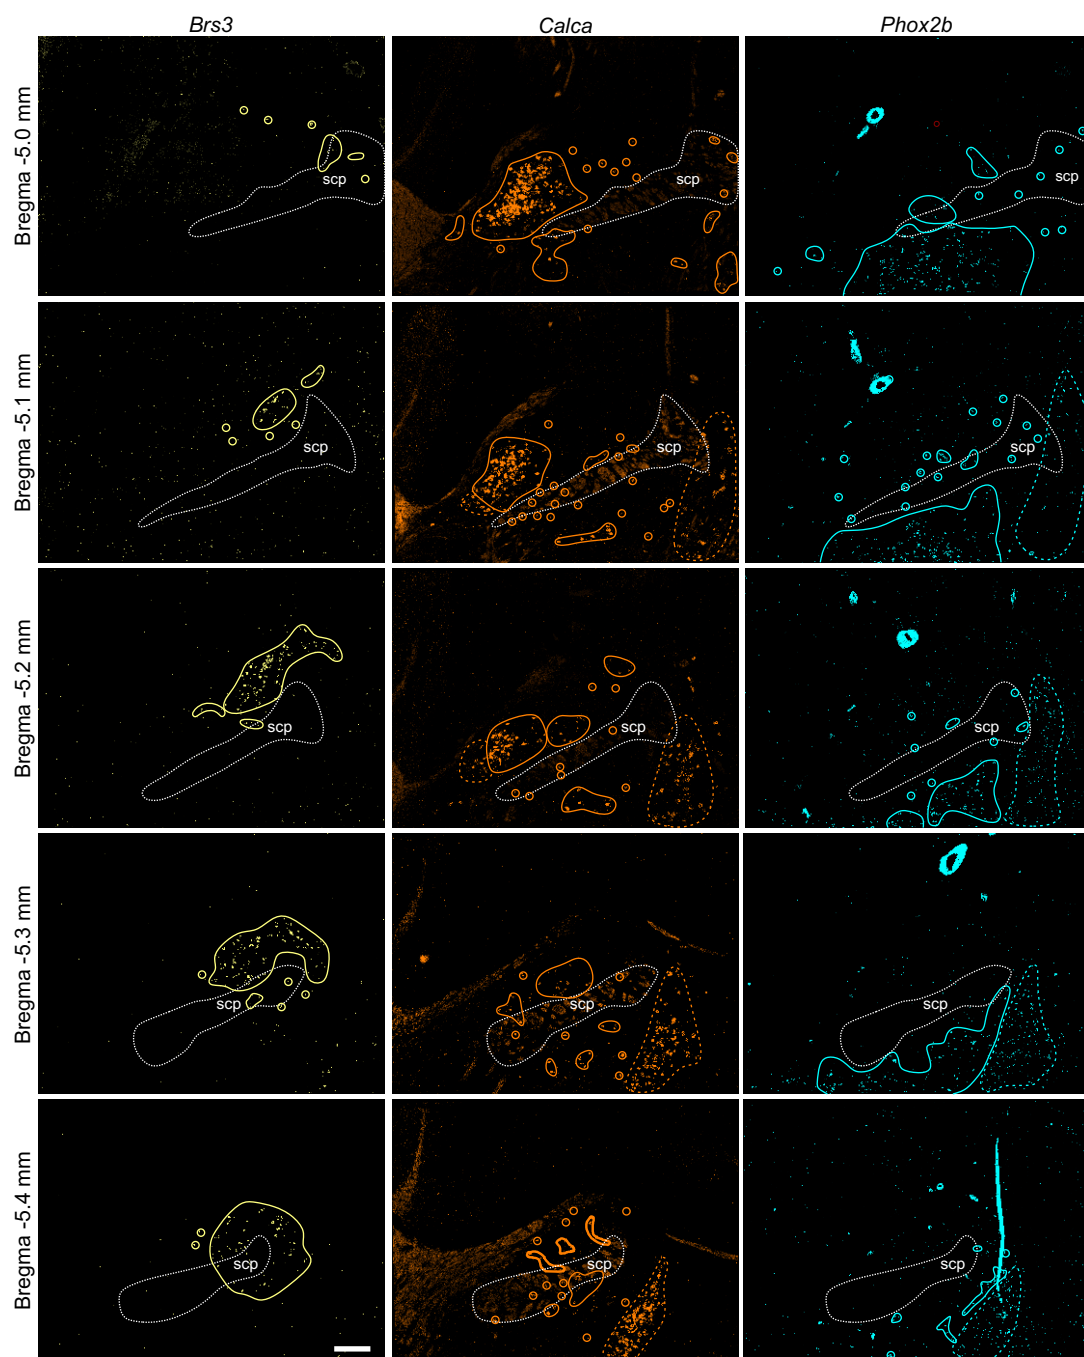

Supplement: supp [file elife-81868-supp-v1.zip]

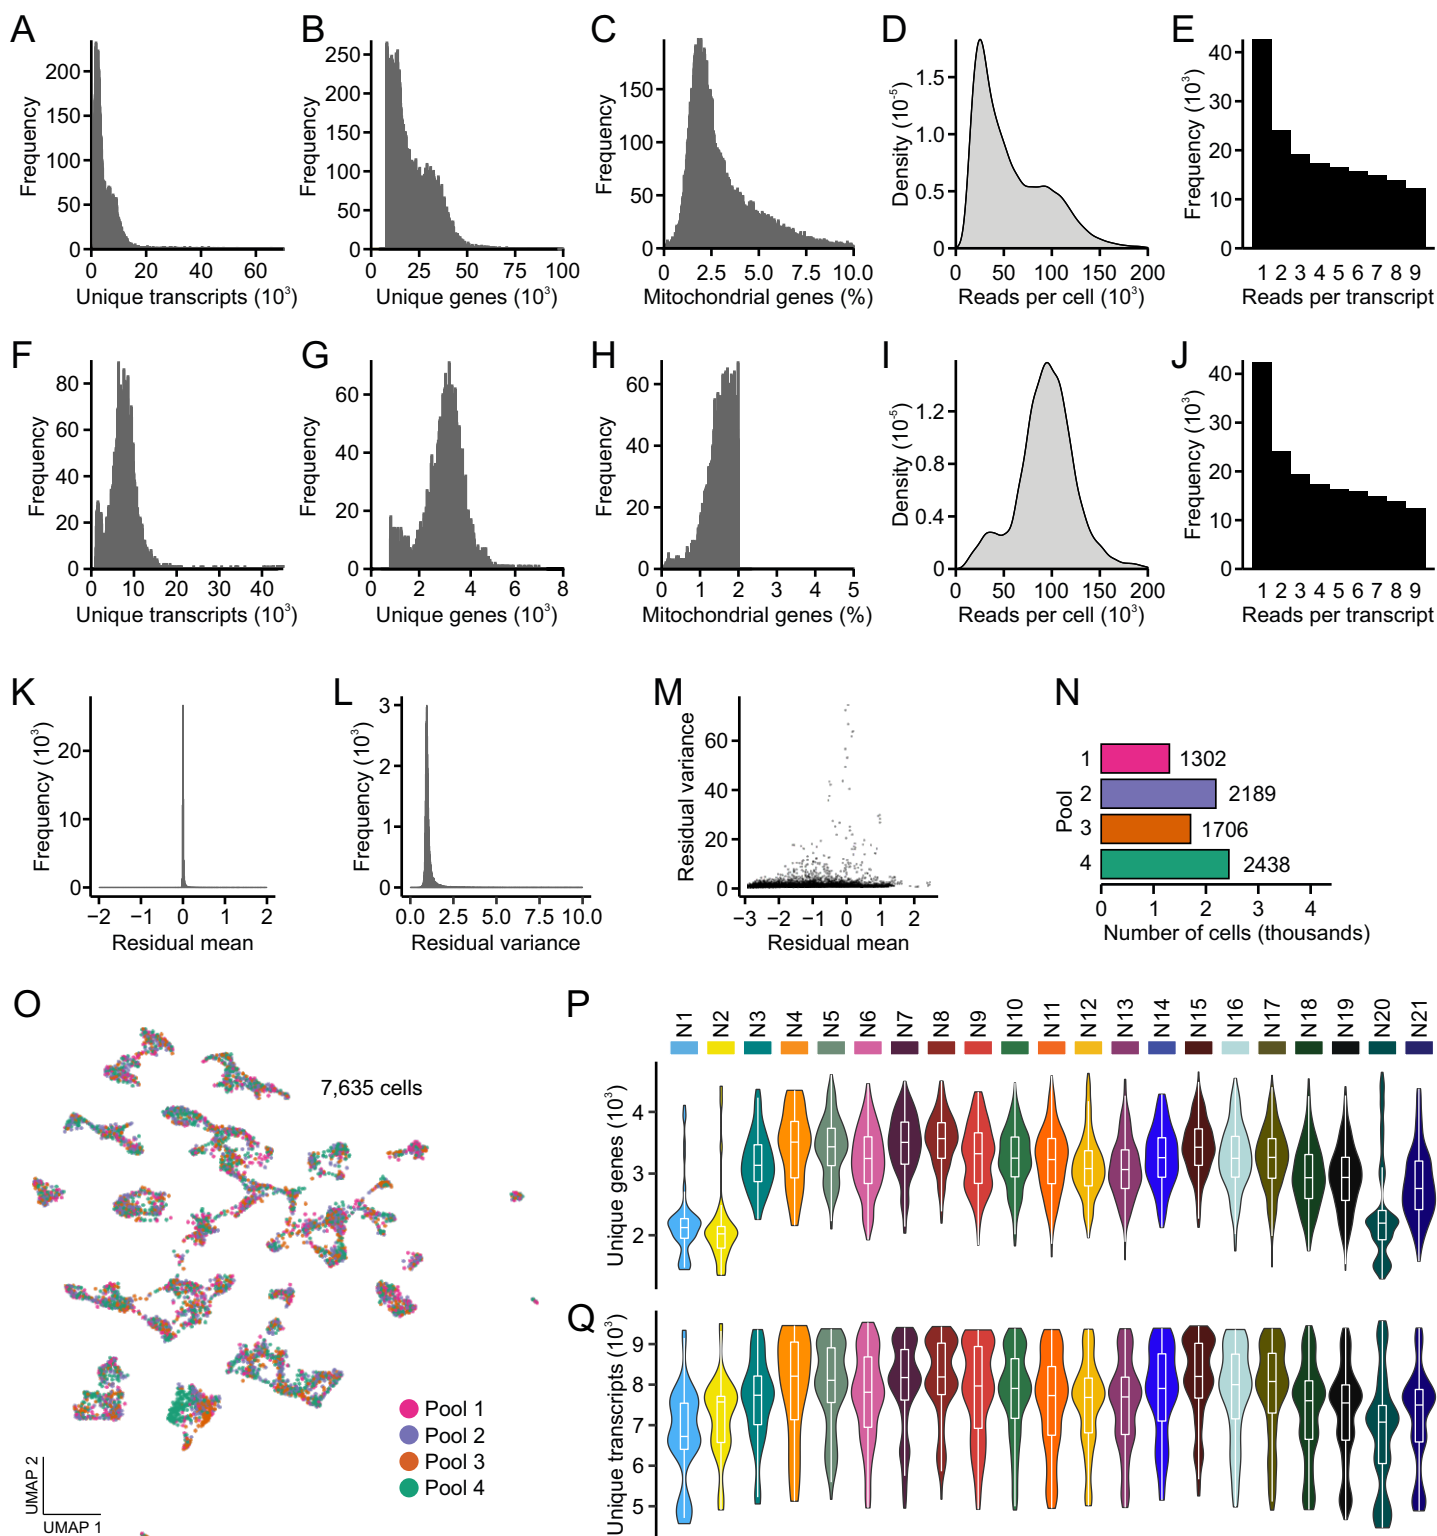

Supplement: supp [file elife-81868-supp-v1.zip]

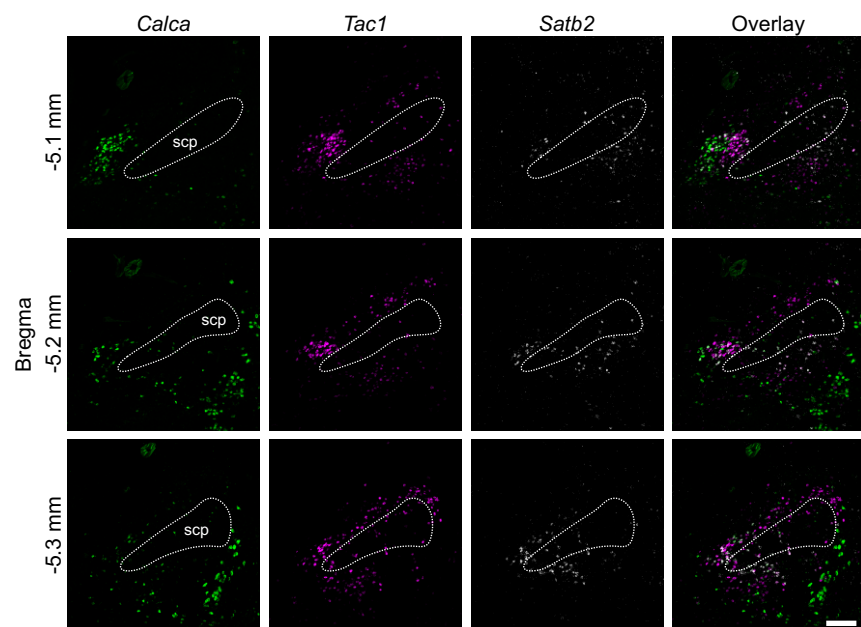

Supplement: supp [file elife-81868-supp-v1.zip]

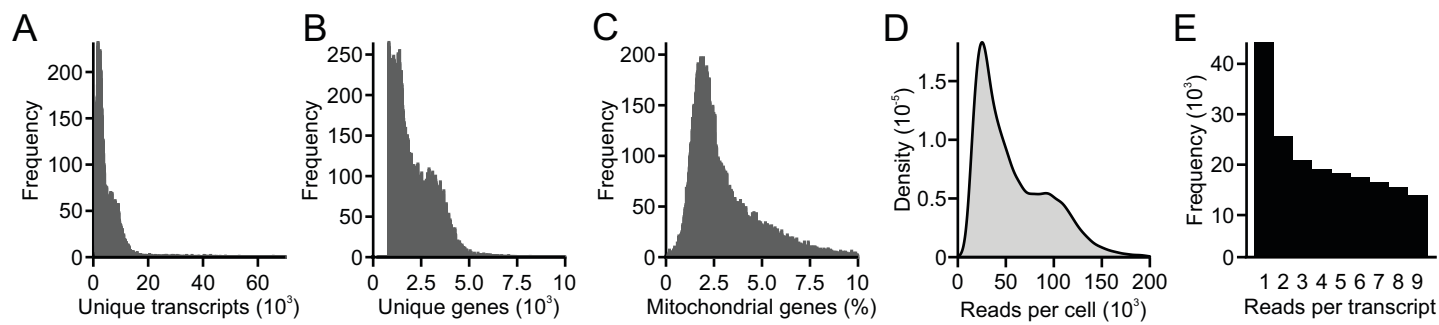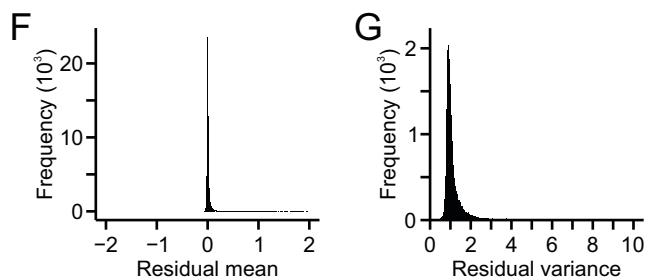

**H**

| Pool | Total mice |
|------|------------|
| 1    | 5; 3♀ + 2♂ |
| 2    |            |
| 3    | 5; 2♀ + 3♂ |
| 4    |            |

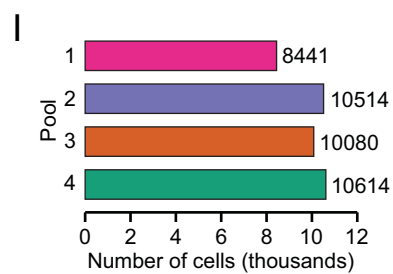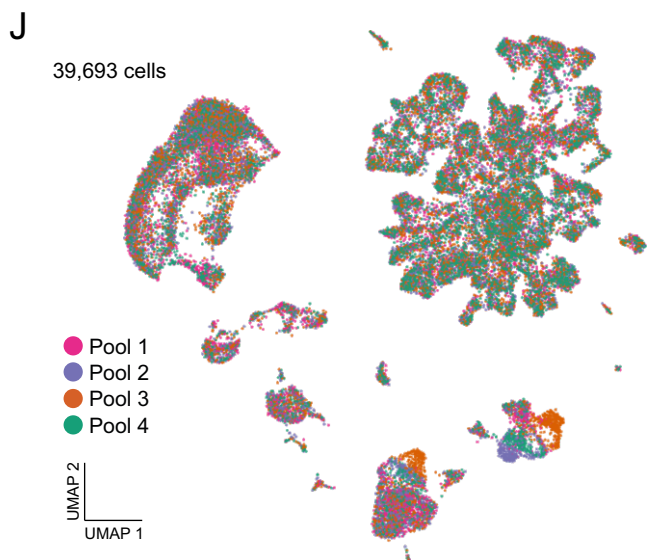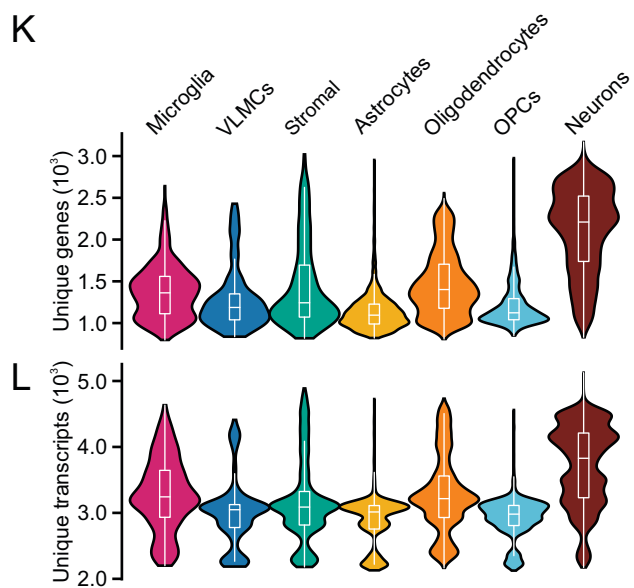

Supplement: supp [file elife-81868-supp-v1.zip]
